# Supplementary material for: Ancestry Dependent DNA Methylation and Influence of Maternal Nutrition
Source: PLoS One. 2015 Mar 5;10(3):e0118466. doi: 10.1371/journal.pone.0118466 (PMC4350920; doi:10.1371/journal.pone.0118466)
Supplement: S1 Data — List of probes that overlap SNPs defined in the 1000 Genomes Project. (XLSX) [file pone.0118466.s001.xlsx]

## Sheet: Sheet1
Data S1: List of filtered probes with SNPs
Infinium array probes that contain SNPs at 1% MAF in all populations defined in the 1000 Genomes Project
ProbeSet	Chr	MapInfo	Source	SourceVersion	SourceSeq	TSS_Coordinate	Gene_Strand	Gene_ID	Symbol	Synonym	Accession	GID	Annotation	Product	Distance_to_TSS	CPG_ISLAND	CPG_ISLAND_LOCATIONS
cg00000292	16	28797601	NCBI:RefSeq	36.1	CGGCCTCAATGGTAAGTGTCCCTTGGAAGAGCGGCTGGTAATTAATGCCC	28797310	+	GeneID:487	ATP2A1	ATP2A; SERCA1;	NM_173201.2	GI:47132613	isoform a is encoded by transcript variant a; sarcoplasmic/endoplasmic reticulum calcium ATPase 1; calcium pump 1; SR Ca(2+)-ATPase 1; calcium-transporting ATPase sarcoplasmic reticulum type; fast twitch skeletal muscle isoform; endoplasmic reticulum class 1/2 Ca(2+) ATPase; go_component: membrane; go_component: integral to membrane; go_component: sarcoplasmic reticulum; go_component: smooth endo…	ATPase; Ca++ transporting; fast twitch 1 isoform a	291	TRUE	16:28797486-28797825
cg00006414	7	148453770	NCBI:RefSeq	36.1	CTCGGAAACCGAGCAGGGCAAAACCCCAGTGCTGATCGTTAGTGGGATCG	148454441	+	GeneID:57541	ZNF398	P51; P71; ZER6; KIAA1339;	NM_020781.2	GI:25777702	isoform b is encoded by transcript variant 2; zinc finger DNA binding protein ZER6; zinc finger-estrogen receptor interaction; clone 6; zinc finger DNA binding protein p52/p71; go_component: nucleus; go_function: DNA binding; go_function: zinc ion binding; go_function: metal ion binding; go_function: transcriptional activator activity; go_process: transcription; go_process: regulation of transcri…	zinc finger 398 isoform b	671	TRUE	7:148453584-148455804
cg00008493	14	92883530	NCBI:RefSeq	36.1	CTGTCTGCCGCGGTGAGTTGAGGCCCAGCCATCATGGTGGGCGGGAAGCG	92883290	+	GeneID:341947	COX8C	COX8-3; MGC119774; MGC119775;	NM_182971.1	GI:33667031	cytochrome c oxidase subunit VIII isoform 3; go_component: mitochondrion; go_component: integral to membrane; go_component: organelle inner membrane; go_function: oxidoreductase activity; go_function: cytochrome-c oxidase activity; go_process: electron transport	cytochrome c oxidase subunit 8C	240	TRUE	14:92883203-92883973
cg00008713	18	11970953	NCBI:RefSeq	36.1	CAGAACAGTACGGAGTTCTGCACGAGCCGGGGGTGGGGCCTGTCTCAGCG	11971455	+	GeneID:3613	IMPA2		NM_014214.1	GI:7657235	inosine monophosphatase 2; go_function: hydrolase activity; go_function: magnesium ion binding; go_function: inositol-1(or 4)-monophosphatase activity; go_process: signal transduction; go_process: phosphate metabolism	inositol(myo)-1(or 4)-monophosphatase 2	502	TRUE	18:11970322-11972436
cg00010193	4	1135216	NCBI:RefSeq	36.1	AAGTCAGGGCGAGCCTGGGCACTGTTGCAGCCTGGCCAGGTGTGCACACG	1135160	+	GeneID:401114	FLJ35816		NM_207489.1	GI:46409601		hypothetical protein LOC401114	56	FALSE
cg00012199	14	20220864	NCBI:RefSeq	36.1	GGGGCTGAGGCGGTGGGACGCACACAATTCTGACTGCGCAACTGTGAACG	20222212	+	GeneID:6038	RNASE4	RNS4; MGC9306;	NM_194430.1	GI:37577169	go_component: cellular component unknown; go_function: hydrolase activity; go_function: nucleic acid binding; go_function: endonuclease activity; go_function: pancreatic ribonuclease activity; go_process: mRNA cleavage	ribonuclease; RNase A family; 4 precursor	1348	TRUE	14:20220472-20221241
cg00013618	22	20710839	NCBI:RefSeq	36.1	CGGTCAGGGATCCCTGAGGGCAGAGAATTTCCAAACATCACAGTTTTGGG	20710659	+	GeneID:3535							180	FALSE
cg00015770	4	122521457	NCBI:RefSeq	36.1	GAACATTTTTTGGTCACTGAGATCGAGTCTCCCAGTGCTTTGGCTTCCCG	122521252	-	GeneID:84109	GPR103	AQ27; SP9155;	NM_198179.1	GI:38016136	QRFP receptor; go_component: integral to membrane; go_function: receptor activity; go_function: neuropeptide Y receptor activity; go_function: rhodopsin-like receptor activity; go_process: signal transduction; go_process: G-protein coupled receptor protein signaling pathway	G protein-coupled receptor 103	205	TRUE	4:122520698-122521834
cg00019495	4	57242282	NCBI:RefSeq	36.1	CGTGCTATCAGCAGCCTGCGTCAGCCAGCCCAGCTATTTAAGCAGGCTGG	57242322	-	GeneID:84525	HOP	OB1; LAGY; Toto; Cameo; NECC1; SMAP31; MGC20820;	NM_032495.4	GI:47717119	lung cancer-associated Y protein; not expressed in choriocarcinoma clone 1; heart odd homeobox 1 protein; go_component: nucleus; go_function: transcription factor activity; go_process: development; go_process: regulation of transcription; DNA-dependent	homeodomain-only protein	40	FALSE
cg00020533	6	35588894	NCBI:RefSeq	36.1	GGATCCAGTCTAATGTTTTCTTCCACATCCCATTGACAAATGACTAATCG	35588623	-	GeneID:7287	TULP1	RP14; TUBL1;	NM_003322.2	GI:6715609	Tubby-like protein-1; go_process: sensory perception; go_process: visual perception	tubby like protein 1	271	FALSE
cg00042156	10	42290848	NCBI:RefSeq	36.1	CTGATTGGATAATATGACCCAATCAGGGCTGGCTGAAATGTTCCTTCTCG	42290967	+	GeneID:84856	MGC16291		NM_032770.3	GI:75812959		hypothetical protein LOC84856	119	FALSE
cg00044729	22	38620922	NCBI:RefSeq	36.1	CTGGCTCAGCTTTCATGCCTTTACACATGATGTGTCCTTTGCCTCTTACG	38619740	-	GeneID:150350	FLJ25421	dJ370M22.3;	NM_152512.3	GI:34222283	dJ370M22.3 (EPSIN 2B)	hypothetical protein LOC150350	1182	FALSE
cg00059740	7	134506229	NCBI:RefSeq	36.1	CGCCACCGGCTTGAGGAGGGTGAAAGTTCAATTCTTGGCCCCTGAAGTTA	134505987	-	GeneID:78996	MGC5242	FLJ22450;	NM_024033.1	GI:13162284	go_function: lyase activity; go_function: carboxy-lyase activity	hypothetical protein LOC78996	242	TRUE	7:134505281-134506466
cg00059930	13	47792383	NCBI:RefSeq	36.1	CGCCAAGCCAGCTGCCAAGCCCACCGTGCACAAGGAGCAGCCCGCATTGC		+	GeneID:5925	RB1	RB; OSRC;	NT_024524.13	retinoblastoma 1	retinoblastoma-1; retinoblastoma suspectibility protein; retinoblastoma susceptibility protein; go_component: nucleus; go_component: nucleus; go_component: chromatin; go_function: protein binding; go_function: protein binding; go_function: androgen receptor binding; go_function: transcription factor activity; go_function: transcription coactivator activity; go_process: M phase; go_process: G1 pha…			TRUE	13:47792306-47793951
cg00060762	15	50051425	NCBI:RefSeq	36.1	TGAACCTGTTCTCGCCTGGGTATGCATGGTATATAAGCCCGGCCATTTCG	50051250	-	GeneID:123169	LEO1	RDL;	NM_138792.2	GI:37059738	senescence downregulated leo1-like; replicative senescence downregulated leo1-like	Leo1; Paf1/RNA polymerase II complex component; homolog	175	TRUE	15:50050679-50052347
cg00061629	11	44281834	NCBI:RefSeq	36.1	GCGGGTTGGGGTCAGGTGGAGAAGCCGCTCTTTGTTAAGGTGACAGAACG		-	GeneID:60529	ALX4	FPP; PFM; PFM1; PFM2; KIAA1788;	NT_009237.17	aristaless-like homeobox 4	homeodomain transcription factor ALX4; parietal foramina 1; parietal foramina 2; go_component: nucleus; go_function: transcription factor activity; go_process: development; go_process: skeletal development; go_process: skeletal development; go_process: regulation of transcription; DNA-dependent			TRUE	11:44281312-44281846
cg00069261	16	22294032	NCBI:RefSeq	36.1	GCGGTAGCTCTTGTCTCCTTGACATCTGAGCCCTGGGAATTAAACTCACG	22293439	-	GeneID:1039	CDR2	Yo; CDR62;	NM_001802.1	GI:55770831	cerebellar degeneration-related protein (62kD); cerebellar degeneration-related antigen-2 (62kD); major Yo paraneoplastic antigen; paraneoplastic cerebellar degeneration-associated antigen; go_component: nucleus; go_function: molecular function unknown; go_process: regulation of translation	cerebellar degeneration-related protein 2	593	TRUE	16:22292441-22294185
cg00073650	16	87449667	NCBI:RefSeq	36.1	CTGTGCTGACCAGTGGGGGCCACGGGCCACACCCAAGGGCTGGGCAGTCG	87451007	+	GeneID:51693	HSPC176		NM_016209.1	GI:7706428	go_process: transport	hematopoietic stem/progenitor cells 176	1340	FALSE
cg00075967	15	72282407	NCBI:RefSeq	36.1	CGCCTGCCCCAGAGCTCCCAAGCCCCTGCCCGCCACATCTGCAGTGCCGC	72282245	-	GeneID:64220	STRA6	PP14296; FLJ12541;	NM_022369.2	GI:21314699	synonyms: PP14296; FLJ12541	stimulated by retinoic acid gene 6 homolog	162	FALSE
cg00077457	1	90232588	NCBI:RefSeq	36.1	AAGCAGGCCATGTTTTAGAATTCTTTCCAGGCGGGTCGCATTGGCTCACG	90233268	+	GeneID:284695	ZNF326	ZAN75; Zfp326; FLJ20403; MGC61591; dJ871E2.1;	NM_181781.2	GI:33946292	isoform 2 is encoded by transcript variant 2; dJ871E2.1 (novel protein (ortholog of mouse zinc finger protein Zan75)); go_component: nucleus; go_function: DNA binding; go_function: metal ion binding; go_process: transcription; go_process: regulation of transcription; DNA-dependent	zinc finger protein 326 isoform 2	680	TRUE	1:90232439-90232665
cg00077877	8	131483656	NCBI:RefSeq	36.1	TGCAAGTAAGTGCTCAGGAATCCTTCTGGCATTCTATTTCTAGCTCTACG	131483399	-	GeneID:50807	DDEF1	PAP; PAG2; AMAP1; ASAP1; ZG14P; KIAA1249;	NM_018482.2	GI:46094080	go_component: membrane; go_function: metal ion binding; go_function: protein binding; go_function: GTPase activator activity; go_process: regulation of GTPase activity	development and differentiation enhancing factor 1	257	FALSE
cg00079056	9	33229641	NCBI:RefSeq	36.1	CGGGAAAACATTTTGCAGAATATGAAATGAGCTGTAAACGTAAGCAGAAA	33230196	+	GeneID:27290	SPINK4	PEC-60; MGC133107;	NM_014471.1	GI:7657452	gastrointestinal peptide; go_function: serine-type endopeptidase inhibitor activity	serine protease inhibitor; Kazal type 4	555	FALSE
cg00081935	12	3057167	NCBI:RefSeq	36.1	CGGTCTTCCTCGGAGCCATCCCCTGGAGGACCCCACTTCGCTCGGTGCCC	3056818	+	GeneID:10867	TSPAN9	NET-5; PP1057;	NM_006675.3	GI:57232744	transmembrane 4 superfamily member tetraspan NET-5; go_component: membrane fraction; go_component: integral to plasma membrane	tetraspanin 9	349	TRUE	12:3055745-3057325
cg00083937	22	49386671	NCBI:RefSeq	36.1	GGGACTGGGGTTGGGAGGACGCTGGGCCTCTGGGTTTAGGCCTCACTCCG	49385997	+	GeneID:23542	MAPK8IP2	IB2; JIP2; PRKM8IPL;	NM_012324.2	GI:21237770	isoform 1 is encoded by transcript variant 1; PRKM8 interacting protein-like; JNK-interacting protein 2; islet-brain 2; JNK MAP kinase scaffold protein JIP2; homologous to mouse JIP-1; go_component: cytoplasm; go_function: kinesin binding; go_function: beta-amyloid binding; go_function: protein kinase binding; go_function: MAP-kinase scaffold activity; go_function: structural molecule activity; g…	mitogen-activated protein kinase 8 interacting protein 2 isoform 1	674	TRUE	22:49384789-49386716
cg00091693	17	36295128	NCBI:RefSeq	36.1	TGACATGTCACTAGGATTGGCACCACAGTCCACCTTGCCTTACTTCCACG	36295005	-	GeneID:54474	KRT20	K20; CK20; KRT21; MGC35423;	NM_019010.1	GI:27894336	cytokeratin 20; keratin; type I cytoskeletal 20; go_component: intermediate filament; go_function: structural constituent of cytoskeleton; go_process: biological process unknown	keratin 20	123	FALSE
cg00094319	13	24568530	NCBI:RefSeq	36.1	TGGCTTGCCCTTTATAACATCAAAATTCATGGTGTCCAGAGCATGCTCCG	24568276	+	GeneID:5042	PABPC3	PABP3; PABPL3;	NM_030979.2	GI:45238848	poly(A)-binding protein-like 3; poly(A)-binding protein; cytoplasmic 3; testis-specific poly(A)-binding protein (PABP); testis-specific poly(A)-binding protein 3; go_component: cytoplasm; go_function: RNA binding; go_function: nucleotide binding; go_function: poly(A) binding; go_process: mRNA metabolism	poly(A) binding protein; cytoplasmic 3	254	TRUE	13:24567943-24568646
cg00095526	1	199348309	NCBI:RefSeq	36.1	CGGGCCTGAGCTTCTGAGGCCAGGCAGCTGTCATTCCACCCAGCCCAGCC	199348317	-	GeneID:779	CACNA1S	MHS5; HOKPP; hypoPP; CCHL1A3; CACNL1A3;	NM_000069.1	GI:4557400	calcium channel; L type; alpha 1 polypeptide; isoform 3 (skeletal muscle; hypokalemic periodic paralysis); go_component: membrane; go_component: membrane fraction; go_component: integral to membrane; go_component: voltage-gated calcium channel complex; go_component: voltage-gated calcium channel complex; go_function: calcium ion binding; go_function: voltage-gated calcium channel activity; go_fun…	calcium channel; voltage-dependent; L type; alpha 1S subunit	8	FALSE
cg00098162	10	90609553	NCBI:RefSeq	36.1	TTGTGTAATGTGCCTAAGAATAACTTGGGGGCCACACATGGTGGCTCACG	90609876	-	GeneID:118932	ANKRD22	MGC22805;	NM_144590.1	GI:21389370	synonym: MGC22805	ankyrin repeat domain 22	323	FALSE
cg00098239	19	7505173	NCBI:RefSeq	36.1	CGACCCTCGAAGGGACACCCCTGCGAGGCTAACGGAAACCCAGACTCACC	7505075	+	GeneID:10908	NTE	sws;	NM_006702.2	GI:31543298	go_function: molecular function unknown; go_process: lipid metabolism	neuropathy target esterase	98	TRUE	19:7504300-7507429
cg00107488	22	18310437	NCBI:RefSeq	36.1	CGGTAAGCCCCAGTGGCAAACCCAGATCAGTTGGTTTCACAGGGGCCAAC	18309515	-	GeneID:10587	TXNRD2	TR; TR3; SELZ; TRXR2; TR-BETA;	NM_145747.1	GI:22035667	isoform 2 is encoded by transcript variant 2; thioredoxin reductase 3; selenoprotein Z; thioredoxin reductase beta; go_component: mitochondrion; go_function: FAD binding; go_function: selenium binding; go_function: disulfide oxidoreductase activity; go_function: thioredoxin-disulfide reductase activity; go_function: oxidoreductase activity; acting on NADH or NADPH; disulfide as acceptor; go_proce…	thioredoxin reductase 2 isoform 2	922	FALSE
cg00113020	19	59865294	NCBI:RefSeq	36.1	CGCAGCCAGGTCATGGTCGGCTACTCATGTCCCATGGGACCTGCCCACTT	59866264	+	GeneID:11006	LILRB4	HM18; ILT3; LIR5; CD85K; LIR-5; LILRB5;	NM_006847.2	GI:21314640	leukocyte immunoglobulin-like receptor 5; leukocyte immunoglobulin-like receptor-5; go_component: plasma membrane; go_component: integral to membrane; go_function: antigen binding; go_function: receptor activity; go_process: immune response; go_process: signal transduction	leukocyte immunoglobulin-like receptor; subfamily B (with TM and ITIM domains); member 4	970	TRUE	19:59865129-59865357
cg00116234	9	18464243	NCBI:RefSeq	36.1	CGGCAGCATTCCATGCTTGGATCCTTGCCGGAATCAGAATCGGACACTGA	18464167	+	GeneID:92949	ADAMTSL1	ADAMTSR1; MGC40193;	NM_052866.2	GI:21327690	isoform 2 is encoded by transcript variant 2; ADAM-TS related protein 1; thrombospondin; punctin; ADAMTS-like; go_component: extracellular matrix (sensu Metazoa)	ADAMTS-like 1 isoform 2	76	FALSE
cg00117172	1	25128425	NCBI:RefSeq	36.1	CGCCCCAAAACCCAGGTGGAGCGGGGCAACCCCGTTAAAAGTCATTCCTG		-	GeneID:864	RUNX3	AML2; CBFA3; PEBP2aC;	NT_004610.18	runt-related transcription factor 3 isoform 2	isoform 2 is encoded by transcript variant 2; core-binding factor; runt domain; alpha subunit 3; encoded by distal 5' portion of the mRNA; go_component: nucleus; go_function: ATP binding; go_function: transcription factor activity; go_process: transcription; go_process: cell proliferation; go_process: regulation of transcription; DNA-dependent; go_process: transcription from RNA polymerase II pro…			TRUE	1:25127692-25131906
cg00128560	16	3292014	NCBI:RefSeq	36.1	TGAGATACCAGCCATTTCCCTTATTTCTCTGACATACTTTTCTTTCTTCG	3291401	-	GeneID:91151	TIGD7	Sancho;	NM_033208.2	GI:22325391	jerky (mouse) homolog-like; go_component: nucleus; go_component: chromosome; pericentric region; go_function: DNA binding; go_process: regulation of transcription	tigger transposable element derived 7	613	FALSE
cg00128766	1	46957803	NCBI:RefSeq	36.1	CGTGTCAGGAGCTGTTCTAGCGCTGGGGATACAGCCATGAACAAAATAAC	46957323	-	GeneID:9813	KIAA0494	RP11-8J9.3;	NM_014774.1	GI:7662159	go_function: calcium ion binding	hypothetical protein LOC9813	480	TRUE	1:46956670-46957806
cg00129774	12	54646681	NCBI:RefSeq	36.1	CGCCCCACCGGGGAAGAAACTTGTCTAGCCCCCAAGAACCAAACTTGCCT		+	GeneID:1017	CDK2	9606;	NT_029419.11	cyclin-dependent kinase 2 isoform 1	isoform 1 is encoded by transcript variant 1; cdc2-related protein kinase; cell devision kinase 2; p33 protein kinase; go_component: nucleus; go_component: cytoplasm; go_function: ATP binding; go_function: nucleotide binding; go_function: protein binding; go_function: protein binding; go_function: protein binding; go_function: protein binding; go_function: transferase activity; go_function: prote…			TRUE	12:54646626-54647300
cg00134539	21	42697140	NCBI:RefSeq	36.1	CGCAGCTCTACGCCAAGGTCTCCAACAAGCTCAAGAGCCGCAGCAGCCCC	42697088	+	GeneID:53347	UBASH3A	TULA;	NM_018961.2	GI:49640012	long form is encoded by transcript variant 1; T-cell ubiquitin ligand protein; go_component: nucleus; go_function: catalytic activity; go_process: metabolism	ubiquitin associated and SH3 domain containing; A long form	52	FALSE
cg00136736	22	28279905	NCBI:RefSeq	36.1	CGTGTTATCTTGGACATAACACAACATTAATTCAACTACTCGGTGGAGCG	28279736	-	GeneID:8563	C22orf19	Fmip; PK1.3;	NM_003678.4	GI:50959084	NF2/meningioma region protein pK1.3; placental protein 39.2	Fms-interacting protein	169	TRUE	22:28279363-28280020
cg00149659	3	10132352	NCBI:RefSeq	36.1	CGCCCCGACCCTACAGGCCTCTAGTGCGCCTGCGCTGCCAGGCCACACCC	10132333	+	GeneID:55845	C3orf10	MDS027; hHBrk1; HSPC300;	NM_018462.4	GI:54262137	uncharacterized hematopoietic stem/progenitor cells protein MDS027; Brk1-like protein	chromosome 3 open reading frame 10	19	TRUE	3:10131593-10133050
cg00168785	2	159850889	NCBI:RefSeq	36.1	TGTGTTTACGCTGGCCAACTGACCTGGTGTGCCCGGGAATTTACTGTTCG	159851309	-	GeneID:151525	WDSUB1	UBOX6; WDSAM1; FLJ36175;	NM_152528.1	GI:22749102	WD repeat and SAM domain containing 1; 2610014F08Rik; go_component: ubiquitin ligase complex; go_function: kinase activity; go_function: ubiquitin-protein ligase activity; go_process: protein ubiquitination	WD repeat; SAM and U-box domain containing 1	420	TRUE	2:159850758-159852121
cg00174901	19	660889	NCBI:RefSeq	36.1	CGGGGGTCCAGGGATCCCAGCCCAGGGCCAGCCCACTCCTGTAGCTACAC	660002	+	GeneID:5064	PALM	KIAA0270;	NM_002579.1	GI:4557041	go_component: plasma membrane; go_component: integral to plasma membrane; go_component: cytoplasmic membrane-bound vesicle; go_process: cell motility; go_process: regulation of cell shape	paralemmin	887	FALSE
cg00177013	20	61809544	NCBI:RefSeq	36.1	TGTGACAGGAGCCAGCTTTGGCTGCTTGTCGGGGAGCCTCAGACCTGGCG	61809809	-	GeneID:10139	ARFRP1	ARP;	NM_003224.2	GI:33466360	ARF-related protein; ADP-ribosylation factor-related protein 1; go_component: Golgi stack; go_component: membrane fraction; go_function: GTP binding; go_function: nucleotide binding; go_function: GTPase activity; go_function: protein binding; go_process: signal transduction; go_process: intracellular protein transport; go_process: small GTPase mediated signal transduction	ADP-ribosylation factor related protein 1	265	TRUE	20:61808609-61811354
cg00177698	17	43373874	NCBI:RefSeq	36.1	ACCAAGCTAACAGGTCCTAAGTCCTCGGAGCCAATGAGTTTCCAGGATCG	43373936	+	GeneID:55163	PNPO	PDXPO; FLJ10535;	NM_018129.1	GI:8922497	pyridoxine-5prime-phosphate oxidase; go_function: FMN binding; go_function: oxidoreductase activity; go_function: pyridoxamine-phosphate oxidase activity; go_process: pyridoxine biosynthesis	pyridoxine 5prime-phosphate oxidase	62	TRUE	17:43373577-43374274
cg00178790	18	13716864	NCBI:RefSeq	36.1	AGGAGTTCCCATTTTCCTTGGGACTGAGGACACAAGGCAATAGACCCACG	13716559	-	GeneID:125228	C18orf19	HsT2329; MGC24180;	NM_152352.1	GI:22748762	synonyms: HsT2329; MGC24180	hypothetical protein LOC125228	305	TRUE	18:13715841-13717430
cg00185839	11	794954	NCBI:RefSeq	36.1	CGGCCCCAGGACCCCGAAGCTGCCCAATGGCTCACGCCCCAGGCCCTCAC	795245	-	GeneID:55367	LRDD	PIDD; MGC16925; DKFZp434D229;	NM_018494.3	GI:61742781	isoform 2 is encoded by transcript variant 2; leucine-rich and death domain containing; go_function: protein binding; go_function: protein binding; go_function: death receptor binding; go_process: signal transduction; go_process: signal transduction	leucine rich repeat and death domain containing protein isoform 2	291	TRUE	11:794772-796159
cg00197381	5	137701568	NCBI:RefSeq	36.1	AATATCGCAGAAAGTGGACGGCCCCAGTTGGAGGCACATCTTGAAACCCG	137701867	+	GeneID:51307	FAM53C	C5orf6;	NM_016605.1	GI:7706138	contains a proline-rich sequence; putative nuclear protein	family 53; member C protein	299	TRUE	5:137701170-137702293
cg00199549	22	34125374	NCBI:RefSeq	36.1	CGGGCCCCACGACCGGGAAGCGAATACTCCACAGGGCACAGTCTCCCAAT	34126128	+	GeneID:4174	MCM5	CDC46; MGC5315; P1-CDC46;	NM_006739.2	GI:23510447	minichromosome maintenance deficient (S. cerevisiae) 5 (cell division cycle 46); DNA replication licensing factor; go_component: nucleus; go_component: nucleus; go_function: ATP binding; go_function: DNA binding; go_function: nucleotide binding; go_function: protein binding; go_function: protein binding; go_function: DNA-dependent ATPase activity; go_process: transcription; go_process: DNA replic…	minichromosome maintenance deficient protein 5	754	TRUE	22:34125141-34127172
cg00226923	6	37080005	NCBI:RefSeq	36.1	CTGGTCTGTGTCCTGGAGTGCAGGGCCTGAGCCTCGGTGCTCTTGGTACG	37081401	+	GeneID:221472	FGD2	ZFYVE4; MGC71330;	NM_173558.2	GI:34222232	FGD1 family; member 2; go_component: ruffle; go_component: cytoskeleton; go_component: lamellipodium; go_component: Golgi apparatus; go_function: protein binding; go_function: zinc ion binding; go_function: metal ion binding; go_function: small GTPase binding; go_function: guanyl-nucleotide exchange factor activity; go_process: filopodium formation; go_process: regulation of cell shape; go_proces…	FYVE; RhoGEF and PH domain containing 2	1396	FALSE
cg00228799	9	130620412	NCBI:RefSeq	36.1	TGAGACTAAGCAGTGACAGTAAAAGCTTTCGACAGTGCTTGACCCTTCCG	130620600	+	GeneID:2021	ENDOG		NM_004435.2	GI:53759133	go_component: mitochondrion; go_function: DNA binding; go_function: hydrolase activity; go_function: endonuclease activity; go_function: magnesium ion binding; go_process: DNA metabolism	endonuclease G precursor	188	TRUE	9:130619231-130621779
cg00234961	22	48632577	NCBI:RefSeq	36.1	CGTCCAGCCTGCAGCCGGGTTTTCTATGGTGCCTGAGCTAAGAATGCTTT	48633533	+	GeneID:9889	ZBED4		NM_014838.1	GI:7662217	go_function: DNA binding; go_function: metal ion binding; go_function: protein dimerization activity	zinc finger; BED domain containing 4	956	TRUE	22:48631731-48634537
cg00237010	12	643122	NCBI:RefSeq	36.1	GTCATAAAGCTACTAGCTCAAAGCAGGCTGGGTGACCTCAGATGGCTCCG	643016	-	GeneID:4815	NINJ2		NM_016533.4	GI:39725945	go_component: integral to plasma membrane; go_function: protein binding; go_process: cell adhesion; go_process: neuron adhesion; go_process: tissue regeneration; go_process: nervous system development	ninjurin 2	106	FALSE
cg00239071	14	99859490	NCBI:RefSeq	36.1	CTGTTACCTCCGATGGCTCCAGCGACAAAATCCATGAACAAGGTGTGGCG	99859432	+	GeneID:283600	C14orf68	HDMCP; HMFN1655;	NM_207117.2	GI:46397376	hepatocellular carcinoma-downregulated mitochondrial carrier protein; go_component: membrane; go_component: integral to membrane; go_component: mitochondrial inner membrane; go_function: binding; go_function: transporter activity; go_process: transport	chromosome 14 open reading frame 68	58	FALSE
cg00240432	7	19123821	NCBI:RefSeq	36.1	CGGAGGTATAAGAGCCTCCAAGTCTGCAGCTCTCGCCCAACTCCCAGACA	19123820	-	GeneID:7291	TWIST1	SCS; ACS3; BPES2; BPES3; TWIST;	NM_000474.3	GI:68160957	blepharophimosis; epicanthus inversus and ptosis 3; acrocephalosyndactyly 3; TWIST homolog of drosophila; blepharophimosis; epicanthus inversus; and ptosis 2; H-twist; B-HLH DNA binding protein; go_component: nucleus; go_function: DNA binding; go_function: protein binding; go_function: enzyme inhibitor activity; go_function: RNA polymerase II transcription factor activity; go_process: morphogenes…	twist	1	TRUE	7:19122442-19124663
cg00241355	12	6513890	NCBI:RefSeq	36.1	CTTGGGCTGGGACTGGCTGAGCCTGGCGGGAGGCGGGGTCCGAGTCACCG	6513945	+	GeneID:2597	GAPDH	G3PD; GAPD; MGC88685;	NM_002046.2	GI:7669491	go_component: cytoplasm; go_function: NAD binding; go_function: oxidoreductase activity; go_function: glyceraldehyde-3-phosphate dehydrogenase (phosphorylating) activity; go_process: glycolysis; go_process: glucose metabolism	glyceraldehyde-3-phosphate dehydrogenase	55	TRUE	12:6513372-6514989
cg00243313	5	1936413	NCBI:RefSeq	36.1	CCACTGTAATCATTCGTCTCAATTACAAATGAGACCTATGAAAGGACACG	1935880	-	GeneID:50805	IRX4		NM_016358.1	GI:7705554	go_component: nucleus; go_function: transcription factor activity; go_process: heart development; go_process: regulation of transcription; DNA-dependent	iroquois homeobox protein 4	533	TRUE	5:1934753-1937496
cg00245878	7	64088310	NCBI:RefSeq	36.1	TATGATTAACTGCCTTTGTTCTGCTTCTGTAAGACTGCTTTCTCACCTCG	64088849	-	GeneID:51351	H-plk		NM_015852.1	GI:7705388	go_component: nucleus; go_function: zinc ion binding; go_function: nucleic acid binding; go_process: biological_process unknown	Krueppel-related zinc finger protein	539	FALSE
cg00256166	15	84139432	NCBI:RefSeq	36.1	CGGTGTTCTAGAGCTTTCCAGAGGGAGCACTGTAGATTGCATATGCCTCT	84139104	-	GeneID:64410	KLHL25	ENC2; FLJ12587;	NM_022480.2	GI:21362104	go_function: protein binding	BTB/POZ KELCH domain protein	328	TRUE	15:84138113-84139588
cg00259755	10	134059753	NCBI:RefSeq	36.1	GCGGACGTGCTGGTGCTCGGGGAAGTCGGGGGCTTTGACGCCTGAAGGCG	134060694	+	GeneID:170394	PWWP2	pp8607; FLJ46823; bA432J24.1; RP11-273H7.1;	NM_138499.2	GI:46358349	synonyms: pp8607; FLJ46823; bA432J24.1; RP11-273H7.1	PWWP domain containing 2	941	TRUE	10:134059284-134061280
cg00269932	19	59705108	NCBI:RefSeq	36.1	CGCCAAGCGACGCAGAGGCAGAGACCAAGTACTGCATGATGTCACTTACA	59705825	+	GeneID:3904	LAIR2	CD306; MGC71634;	NM_002288.3	GI:32481203	isoform a is encoded by transcript variant 1; go_function: receptor activity	leukocyte-associated Ig-like receptor 2 isoform a	717	FALSE
cg00273068	20	39429161	NCBI:RefSeq	36.1	CTCTGAAGACAAGCGTATCCTGAGGGTGGACGACTCCTGGAAAGTCCACG	39428912	-	GeneID:90187	EMILIN3	EMILIN5; C20orf130; dJ620E11.4; DKFZp434A2410;	NM_052846.1	GI:45433500	elastin microfibril interfacer 5; go_component: extracellular matrix (sensu Metazoa)	elastin microfibril interfacer 3	249	TRUE	20:39427979-39429312
cg00283535	8	124818745	NCBI:RefSeq	36.1	CGTCATGTAAGTACTCATTGCCTTTGGGAATTGGTTTTAATTTTGGTTAG	124818828	-	GeneID:312	ANXA13	ISA; ANX13;	NM_004306.2	GI:51895794	isoform a is encoded by transcript variant 1; annexin; intestine-specific; annexin XIII; go_component: plasma membrane; go_function: calcium ion binding; go_function: calcium-dependent phospholipid binding; go_process: cell differentiation; go_process: negative regulation of coagulation	annexin A13 isoform a	83	FALSE
cg00288562	7	23538170	NCBI:RefSeq	36.1	CGTCGTGCTCTGAGGAGGCCAGGAGATTTCTGGCGGCGCCGGCGCCATTT	23538124	-	GeneID:29896	TRA2A	HSU53209;	NM_013293.2	GI:33620726	htra-2 alpha; putative MAPK activating protein PM24; go_component: nucleus; go_function: RNA binding; go_function: nucleotide binding; go_process: nuclear mRNA splicing; via spliceosome	transformer-2 alpha	46	TRUE	7:23537186-23539238
cg00290028	13	36291125	NCBI:RefSeq	36.1	CGGTTCAAAGTATCTTCTACAGGAGTTCCAGTATGCAAATTAGGATTGTT	36291339	+	GeneID:5994	RFXAP		NM_000538.2	GI:19924157	RFX-associated protein; RFX DNA-binding complex 36 kDa subunit; go_component: nucleus; go_function: transcription factor activity; go_function: transcription coactivator activity; go_process: transcription from RNA polymerase II promoter	regulatory factor X-associated protein	214	TRUE	13:36291043-36292272
cg00293409	3	197851066	NCBI:RefSeq	36.1	CGGGGCTGGGCTACCTCCTTGCTGTGGGGCATCAGATTATTTTAGCACCA	197851053	+	GeneID:375387	LRRC33	GARPL1; UNQ3030; MGC50789;	NM_198565.1	GI:38348405	ELLP3030; go_component: membrane; go_component: integral to membrane	leucine rich repeat containing 33	13	TRUE	3:197850472-197851449
cg00295325	2	169596178	NCBI:RefSeq	36.1	TAAGGATCAATGTCCCTAAGGGCAGCCCAAGCACAGTTCAGTGACATACG	169596079	-	GeneID:8647	ABCB11	BSEP; PGY4; SPGP; ABC16; PFIC2; PFIC-2;	NM_003742.2	GI:21536377	progressive familial intrahepatic cholestasis 2; ABC member 16; MDR/TAP subfamily; bile salt export pump; sister p-glycoprotein; go_component: membrane fraction; go_component: integral to plasma membrane; go_function: ATP binding; go_function: ATPase activity; go_function: nucleotide binding; go_function: transporter activity; go_function: bile acid-exporting ATPase activity; go_function: sodium-…	ATP-binding cassette; sub-family B (MDR/TAP); member 11	99	FALSE
cg00296685	6	30984051	NCBI:RefSeq	36.1	CTGGGCTCTTGCCTGTGAAATCTTTCTTTGCTTTCCCCATCTTTTCCTCG	30983956	+	GeneID:2968	GTF2H4	TFIIH;	NM_001517.4	GI:54144651	general transcription factor IIH; polypeptide 4 (52kD subunit); TFIIH basal transcription factor complex p52 subunit; go_component: nucleus; go_component: transcription factor TFIIH complex; go_function: transcription factor activity; go_process: transcription; go_process: DNA repair; go_process: regulation of transcription; DNA-dependent; go_process: transcription from RNA polymerase II promoter	general transcription factor IIH; polypeptide 4; 52kDa	95	TRUE	6:30983195-30984459
cg00297600	8	35521212	NCBI:RefSeq	36.1	CGGATTCGGTCATTTAAGAGACACAGAAACTCTCCAAGGTGGGTGTCACT	35521452	+	GeneID:137970	UNC5D	Unc5h4; KIAA1777; PRO34692;	NM_080872.1	GI:18254471	go_component: integral to membrane; go_function: protein binding; go_function: receptor activity; go_process: apoptosis; go_process: development; go_process: signal transduction	netrin receptor Unc5h4	240	FALSE
cg00298951	12	107257921	NCBI:RefSeq	36.1	CGCTGCCTGGCTGTCGGTTGTTTTGATTATTCCACTAATGATGGTGACCA	107257212	-	GeneID:1240	CMKLR1	DEZ; ChemR23; MGC126105; MGC126106;	NM_004072.1	GI:4758013	orphan G-protein coupled receptor; Dez; go_component: integral to membrane; go_component: integral to plasma membrane; go_function: receptor activity; go_function: receptor activity; go_function: chemokine receptor activity; go_function: rhodopsin-like receptor activity; go_function: C5a anaphylatoxin receptor activity; go_function: G-protein coupled receptor activity; unknown ligand; go_process:…	chemokine-like receptor 1	709	TRUE	12:107257760-107257967
cg00312919	7	38184235	NCBI:RefSeq	36.1	AACCTATTGGCCAGATGACATGTCAATCTTCTACTGACCAGTAAACGACG	38184458	+	GeneID:83930	STARD3NL	MENTHO; MGC3251;	NM_032016.2	GI:31543655	MLN64 N-terminal domain homolog; go_component: integral to membrane	MLN64 N-terminal homolog	223	TRUE	7:38183900-38185055
cg00319692	8	87180235	NCBI:RefSeq	36.1	AACCCTGACTATCACCTGATAGATTGCTTGTGCTGCCTGATAATTACTCG	87180255	+	GeneID:245972	ATP6V0D2	VMA6; ATP6D2; FLJ38708;	NM_152565.1	GI:22749164	ATPase; H+ transporting; lysosomal 38kD; V0 subunit d isoform 2; go_component: proton-transporting two-sector ATPase complex; go_function: hydrogen-transporting ATPase activity; rotational mechanism; go_function: hydrogen-transporting ATP synthase activity; rotational mechanism; go_process: ATP synthesis coupled proton transport	ATPase; H+ transporting; lysosomal 38kDa; V0 subunit d isoform 2	20	FALSE
cg00321478	1	195505021	NCBI:RefSeq	36.1	ACACTGTGTGCTAATGCCAAGTTGTCTTGTTCAACGGCAGCTGCTCTACG	195504031	+	GeneID:23418	CRB1	RP12;	NM_012076.2	GI:41327706	isoform I precursor is encoded by transcript variant 1; crumbs (Drosophila) homolog 1; crumbs homologue 1 (alternative protein); go_component: integral to membrane; go_function: calcium ion binding; go_process: visual perception; go_process: sensory perception; go_process: cell-cell signaling; go_process: establishment and/or maintenance of cell polarity	crumbs homolog 1 isoform I precursor	990	FALSE
cg00324733	11	17254923	NCBI:RefSeq	36.1	CGCCTGGTGCTTGCGTCCAGCGCACAAACCTGTCCTCCAGCCCCCGGCCC	17254888	+	GeneID:4925	NUCB2	NEFA;	NM_005013.1	GI:4826869	Nucb2 splice variant; go_component: cytosol; go_component: plasma membrane; go_component: extracellular space; go_component: ER-Golgi intermediate compartment; go_function: DNA binding; go_function: calcium ion binding	nucleobindin 2	35	TRUE	11:17254226-17255295
cg00327483	1	158427211	NCBI:RefSeq	36.1	TCCATGAGTGCTACAGACAGGATGGGGCCCAGAGCTGTGCCGGGTCTGCG	158427020	+	GeneID:844	CASQ1	CASQ; PDIB1; CALMITINE;	NM_001231.2	GI:21536273	calmitine; calsequestrine; Calsequestrin; fast-twitch; skeletal muscle-1; calsequestrin 1; fast-twitch; skeletal muscle; go_component: mitochondrial matrix; go_component: smooth endoplasmic reticulum; go_function: calcium ion binding; go_process: muscle development	skeletal muscle calsequestrin 1	191	FALSE
cg00332153	4	102931033	NCBI:RefSeq	36.1	CGCAGGCCCCTCGGCTTCAACCGCCACAATGCTGCCAGCAGCGCCAGGCA	102930919	+	GeneID:55024	BANK1	BANK; FLJ20706; FLJ34204;	NM_017935.2	GI:32484980	synonyms: BANK; FLJ20706; FLJ34204	B-cell scaffold protein with ankyrin repeats 1	114	TRUE	4:102930744-102931523
cg00333226	7	49784309	NCBI:RefSeq	36.1	TAGGTTTGGCGCCGGTCTTCAGGGCTGAGGGTGCATGCTGGGTGTCCCCG	49783803	+	GeneID:375567	UNQ739	MGC131845;	NM_198570.1	GI:38348413	PSST739	hypothetical protein LOC375567	506	TRUE	7:49783381-49786431
cg00343092	22	41877918	NCBI:RefSeq	36.1	TCAAGAGCCCGAGGTCTCCCAGATATTCTGAGACCCTCAAGGGAGTTCCG	41877479	+	GeneID:706	BZRP	DBI; IBP; MBR; PBR; PKBS; PTBR; mDRC; pk18;	NM_000714.4	GI:74275349	isoform PBR is encoded by transcript variant PBR; benzodiazepine peripheral binding site; peripheral-type benzodiazepine receptor; mitochondrial benzodiazepine receptor; go_component: membrane; go_component: mitochondrion; go_component: integral to membrane; go_component: mitochondrial outer membrane; go_function: receptor activity; go_function: benzodiazepine receptor activity; go_function: benz…	peripheral benzodiazapine receptor isoform PBR	439	TRUE	22:41877019-41878182
cg00359325	3	49352423	NCBI:RefSeq	36.1	CGGAGACTCAGAAGTCCGAGCTTGGACCCTTAATGAGGACCACACTCCAA	49352519	-	GeneID:7375	USP4	UNP; Unph;	NM_003363.2	GI:40795664	isoform a is encoded by transcript variant 1; ubiquitin specific protease; proto-oncogene; ubiquitin specific protease 4 (proto-oncogene); ubiquitin carboxyl-terminal hydrolase 4; ubiquitin thiolesterase 4; ubiquitin-specific processing protease 4; deubiquitinating enzyme 4; go_component: nucleus; go_component: lysosome; go_function: peptidase activity; go_function: ubiquitin thiolesterase activi…	ubiquitin specific protease; proto-oncogene isoform a	96	TRUE	3:49352231-49353294
cg00364814	12	55977722	NCBI:RefSeq	36.1	CGTGTGTTTATATGAATATGTTGTTAACAGTGAGATTTCTGATATGGTAT	55977083	-	GeneID:22864	R3HDM2	PR01365; KIAA1002;	NM_014925.2	GI:33356165	go_component: nucleus; go_function: nucleic acid binding	hypothetical protein LOC22864	639	FALSE
cg00368022	5	31568410	NCBI:RefSeq	36.1	CGCCCTCTGCTTGGCCCTCTGAGCGTCAGGGCTTCCGCTGATTCTGCCCC	31568158	+	GeneID:55322	FLJ11193	DKFZp667N066;	NM_018356.1	GI:8922930	synonym: DKFZp667N066	hypothetical protein LOC55322	252	TRUE	5:31567403-31568710
cg00368415	1	149851022	NCBI:RefSeq	36.1	CGCAGTTCGGAAGCAAGGCCTGCCGGGAGTTGTAGTTTATCTTTCATGCT	149851286	+	GeneID:81609	SNX27	MY014; KIAA0488; MGC20471;	NM_030918.5	GI:73695940	go_function: protein binding; go_process: protein transport; go_process: intracellular signaling cascade	sorting nexin family member 27	264	TRUE	1:149850872-149852255
cg00384537	17	36891489	NCBI:RefSeq	36.1	CGGTAAAATGGGACAGCTTATCACCCTAGATACTGCAGAGCCCTGATGGA	36891194	-	GeneID:3886	KRTHA5	HA5; Ha-5; hHa5;	NM_002280.3	GI:15431313	hard keratin; type I; 5; go_component: intermediate filament; go_function: structural molecule activity; go_process: morphogenesis	type I hair keratin 5	295	FALSE
cg00386408	5	135392869	NCBI:RefSeq	36.1	CGCCCCCAGCCCAGTTCAATGCCCCCAGCGGCTTGCGCTCCGAGCCCCGA	135392597	+	GeneID:7045	TGFBI	CSD; CDB1; CDG2; CSD1; CSD2; CSD3; LCD1; BIGH3; CDGG1;	NM_000358.1	GI:4507466	corneal dystrophy; kerato-epithelin; go_component: extracellular space; go_component: extracellular matrix (sensu Metazoa); go_function: protein binding; go_function: integrin binding; go_process: cell adhesion; go_process: sensory perception; go_process: visual perception; go_process: cell proliferation; go_process: negative regulation of cell adhesion	transforming growth factor; beta-induced; 68kDa	272	TRUE	5:135392351-135393108
cg00396894	2	27215924	NCBI:RefSeq	36.1	GCTCTGGGACCTTCTTCAAGAGACCATCCAAAGGCTGGCCCTTGATAACG	27215782	-	GeneID:339779	MGC44505		NM_178553.2	GI:31341713		hypothetical protein LOC339779	142	FALSE
cg00397545	19	50109366	NCBI:RefSeq	36.1	CGTGCACCCACTTAGAGTTGTGAGCCCTTAAAAGGAACAGGGATTGCTCA	50109761	+	GeneID:341	APOC1		NM_001645.3	GI:51944963	go_component: extracellular region; go_function: lipid transporter activity; go_process: lipid transport; go_process: lipid metabolism; go_process: lipoprotein metabolism	apolipoprotein C-I precursor	395	TRUE	19:50109252-50109549
cg00397740	1	159402945	NCBI:RefSeq	36.1	CGCCTGAGTTCTGAGGTGCTCTGCTTGCCACACCTCTGTAGGCCAACAAG	159402818	+	GeneID:5498	PPOX	VP; PPO; V290M; MGC8485;	NM_000309.2	GI:45439340	go_component: mitochondrion; go_function: oxidoreductase activity; go_function: electron transporter activity; go_function: protoporphyrinogen oxidase activity; go_process: electron transport; go_process: heme biosynthesis	protoporphyrinogen oxidase	127	TRUE	1:159402295-159403660
cg00402366	1	74436338	NCBI:RefSeq	36.1	CTTATGAGTTGGAGACAAGTGGCCCAGCCCCAACACAGTCAGACAAATCG	74436419	-	GeneID:127255	LRRC44	MGC22773;	NM_145258.1	GI:21687083	synonym: MGC22773	leucine rich repeat containing 44	81	TRUE	1:74436070-74436782
cg00405677	5	153838295	NCBI:RefSeq	36.1	CGGATCCAAGGAAAGGAATCCAGAATCACCAAGCGAAAAGAAGGCCTACA	153838017	-	GeneID:9421	HAND1	Hxt; eHand; Thing1;	NM_004821.1	GI:4758505	go_component: nucleus; go_function: transcription factor activity; go_process: development; go_process: heart development; go_process: regulation of transcription; DNA-dependent; go_process: transcription from RNA polymerase II promoter	basic helix-loop-helix transcription factor HAND1	278	FALSE
cg00406188	1	150913840	NCBI:RefSeq	36.1	CGGTGGATTAAATCTGAGTTGATTCTGTCACCTAAAGCAAGGAGAATGAT	150914395	+	GeneID:353140	LCE2C	LEP11;	NM_178429.2	GI:57242770	late envelope protein 11	late cornified envelope 2C	555	FALSE
cg00406844	22	31083939	NCBI:RefSeq	36.1	AGGAGAATGGACCCTTCCTCCACCTCAGCTCAGAGCACAGTGATGATTCG	31083854	+	GeneID:10738	RFPL3		NM_006604.1	GI:5730012	go_component: ubiquitin ligase complex; go_function: zinc ion binding; go_function: metal ion binding; go_function: protein binding; go_function: ubiquitin-protein ligase activity; go_process: protein ubiquitination	ret finger protein-like 3	85	FALSE
cg00407150	3	42718798	NCBI:RefSeq	36.1	GAGCATGGTGAAGAGCCCGTGAAATAGCTTTGTCAGCTGCCTCCCACTCG	42718017	-	GeneID:57467	GUP1	OACT3; C3orf3; MSTP002; KIAA1173;	NM_020707.2	GI:21359936	go_component: cytoplasm; go_component: integral to membrane; go_function: molecular function unknown; go_process: biological process unknown	hypothetical protein LOC57467	781	FALSE
cg00410419	13	75009786	NCBI:RefSeq	36.1	TTGTGTTTCTGCTTCCGTTTCAGGTCACCAACCAGGTGGGTGAGCGGCCG	75009987	-	GeneID:170622	COMMD6	Acrg;	NM_203495.1	GI:45333905	isoform b is encoded by transcript variant 2; Acrg embryonic lethality (mouse) minimal region ortholog; AK000009 gene	COMM domain containing 6 isoform b	201	TRUE	13:75009496-75010455
cg00410831	19	49121158	NCBI:RefSeq	36.1	TCAAGTCACTGGCAAATCCAATGTCTAATGAGGCCACTCTTACTGGTTCG	49121397	-	GeneID:7596	ZNF45		NM_003425.2	GI:31377804	zinc finger protein 45 (a Kruppel-associated box (KRAB) domain polypeptide); go_component: nucleus; go_function: zinc ion binding; go_function: metal ion binding; go_function: nucleic acid binding; go_function: transcription factor activity; go_process: transcription; go_process: development; go_process: regulation of transcription; DNA-dependent; go_process: regulation of transcription; DNA-depe…	zinc finger protein 45	239	FALSE
cg00412772	19	43486685	NCBI:RefSeq	36.1	AGAGAAGTTGGGTCCTAAGGCCAAGGGCGCCTGGGCCCTGCAGAGGAGCG	43486644	+	GeneID:64073	C19orf33	IMUP; H2RSP; IMUP-1; IMUP-2; MGC39135; MGC75180;	NM_033520.1	GI:41281602	immortalization-upregulated protein; go_component: nucleus; go_function: molecular function unknown; go_process: biological process unknown	HAI-2 related small protein	41	FALSE
cg00413066	15	50192756	NCBI:RefSeq	36.1	CGGAGTAATATGAACTGAGAAAGTTTAATATAAATATTAGATGGCCGGGC	50192264	-	GeneID:10017	BCL2L10	Boo; Diva; BCL-B; MGC129810; MGC129811;	NM_020396.2	GI:20336328	go_component: mitochondrion; go_component: integral to membrane; go_component: membrane fraction; go_function: protein binding; go_process: anti-apoptosis; go_process: spermatogenesis; go_process: caspase activation; go_process: regulation of apoptosis; go_process: female gamete generation	BCL2-like 10 (apoptosis facilitator)	492	TRUE	15:50191302-50192847
cg00415993	5	75954944	NCBI:RefSeq	36.1	CGGCACAGGAGAGCAAACTTCTACAGACAGACCAAGGCTTCCATTTGCTG	75954996	-	GeneID:2151	F2RL2	PAR3;	NM_004101.2	GI:34577053	protease-activated receptor 3; Coagulation factor II receptor-like 2 (protease-actovated receptor 3); thrombin receptor-like 2; coagulation factor II receptor-like 2; go_component: plasma membrane; go_component: integral to plasma membrane; go_function: receptor activity; go_function: thrombin receptor activity; go_function: rhodopsin-like receptor activity; go_function: phosphoinositide phosphol…	coagulation factor II (thrombin) receptor-like 2 precursor	52	FALSE
cg00418150	11	44284445	NCBI:RefSeq	36.1	GGGTAGGGACGCTTGCAGCCCGGGAGGGTTTCTCTCACCAACTCTTTCCG		-	GeneID:60529	ALX4	FPP; PFM; PFM1; PFM2; KIAA1788;	NT_009237.17	aristaless-like homeobox 4	homeodomain transcription factor ALX4; parietal foramina 1; parietal foramina 2; go_component: nucleus; go_function: transcription factor activity; go_process: development; go_process: skeletal development; go_process: skeletal development; go_process: regulation of transcription; DNA-dependent			TRUE	11:44283505-44284554
cg00419564	1	151775484	NCBI:RefSeq	36.1	CTGGGGTGACCCTGAGTATCCTCTGTGGGACACCGGCATCCTGTGAGGCG	151775341	-	GeneID:6277	S100A6	2A9; PRA; 5B10; CABP; CACY;	NM_014624.3	GI:52352807	S100 calcium-binding protein A6 (calcyclin); prolactin receptor-associated protein; go_component: cytoplasm; go_component: nuclear envelope; go_function: protein binding; go_function: growth factor activity; go_function: calcium ion binding; go_process: cell cycle; go_process: axonogenesis; go_process: cell proliferation; go_process: cell-cell signaling; go_process: signal transduction; go_proces…	S100 calcium-binding protein A6	143	TRUE	1:151774923-151775537
cg00425792	17	30929616	NCBI:RefSeq	36.1	GAGCCCGGGACACAAGGGCTGACTCCAGCTGTTGGCTTTGAGTATCCCCG	30929687	-	GeneID:5193	PEX12		NM_000286.1	GI:4505720	peroxisome biogenesis factor 12; go_component: peroxisome; go_component: integral to membrane; go_component: ubiquitin ligase complex; go_component: integral to peroxisomal membrane; go_component: integral to peroxisomal membrane; go_function: protein binding; go_function: protein binding; go_function: protein binding; go_function: protein binding; go_function: zinc ion binding; go_function: ubiq…	peroxisomal biogenesis factor 12	71	TRUE	17:30929274-30930217
cg00426963	9	85725575	NCBI:RefSeq	36.1	CTCTCGGGCTTGAATGTGCCCAAGGTTCAACCTCTACGGTAGGAAATGCG	85726162	-	GeneID:55582	KIF27	RP11-575L7.3; DKFZp434D0917;	NM_017576.1	GI:30794487	go_component: microtubule; go_component: microtubule associated complex; go_function: ATP binding; go_function: nucleotide binding; go_function: microtubule motor activity; go_process: microtubule-based movement	kinesin family member 27	587	TRUE	9:85725444-85726518
cg00429618	9	99002171	NCBI:RefSeq	36.1	AGGGTTTGCGTTGCCGGCCTTGTGGGCCCTTGAAGCGCTCTGTTAAAGCG	99001731	-	GeneID:387328	ZNF322B	ZNF322; FLJ23393;	NM_199005.1	GI:39841070	go_component: nucleus; go_function: zinc ion binding; go_function: metal ion binding; go_function: nucleic acid binding	zinc finger protein 322B	440	TRUE	9:99001831-99002323
cg00431549	12	14930292	NCBI:RefSeq	36.1	CGATGGCCAAAACTTCTGCACCAGAGCAGCATCCTGTGTAACACAGTCAG	14930095	-	GeneID:4256	MGP	NTI; GIG36; MGLAP;	NM_000900.2	GI:49574513	go_component: extracellular matrix (sensu Metazoa); go_function: calcium ion binding; go_function: structural constituent of bone; go_function: extracellular matrix structural constituent; go_process: ossification; go_process: cell differentiation; go_process: cartilage condensation; go_process: sensory perception of sound; go_process: regulation of bone mineralization	matrix Gla protein	197	FALSE
cg00432979	13	20648473	NCBI:RefSeq	36.1	AGGAAAGCGGTGCGTGAGGCGGGCGGCCAGGGCACGGTGCGTGGGGTGCG	20648372	+	GeneID:78988	MRP63	bMRP63; MGC3243;	NM_024026.4	GI:46370097	mitochondrial ribosomal protein bMRP63; go_function: structural constituent of ribosome	mitochondrial ribosomal protein 63	101	TRUE	13:20648189-20649468
cg00436282	4	70896038	NCBI:RefSeq	36.1	CCAGGAAACAACTGTACCCACTGCATGTTAATCCCACTGTTAGTCTAGCG	70896237	+	GeneID:6779	STATH	STR;	NM_003154.2	GI:57164944	isoform a is encoded by transcript variant 1; go_component: extracellular region; go_function: protein binding; go_function: hydroxyapatite binding; go_function: structural constituent of tooth enamel; go_function: extracellular matrix constituent; lubricant activity; go_process: ossification; go_process: saliva secretion; go_process: negative regulation of bone mineralization	statherin isoform a	199	FALSE
cg00453258	10	105209162	NCBI:RefSeq	36.1	TTATCAAATTCAAGTCCTCTGCCAGCAAATCCAGGATGTTTCATTCTACG	105208635	-	GeneID:255022	FAM26C	MGC39514; MGC39617;	NM_001001412.1	GI:47777332	go_component: integral to membrane	hypothetical protein LOC255022	527	FALSE
cg00466436	20	71163	NCBI:RefSeq	36.1	CGGGAGGATGTAGGATATTGTGCCAACATAGCTTCAATCTATTGGCTAGC	71252	+	GeneID:81623	DEFB126	DEFB26; hBD-26; C20orf8; DEFB-26; ESP13.2; bA530N10.1;	NM_030931.2	GI:30061484	beta defensin 26; epididymal secretory protein ESP13.2; beta-defensin 26; go_component: extracellular region; go_function: protease inhibitor activity; go_process: proteolysis; go_process: defense response to bacteria	beta defensin 126 preproprotein	89	FALSE
cg00466492	19	7897731	NCBI:RefSeq	36.1	AAATGGACCTAAAGTGGCTTGGCTGACGTGGCTAGCGGGCCACTGAGCCG	7897029	-	GeneID:404217	CTXN1	CTXN; FLJ25968;	NM_206833.1	GI:45592953	cortexin; go_component: integral to membrane	cortexin 1	702	TRUE	19:7895314-7897758
cg00469635	11	73560119	NCBI:RefSeq	36.1	CGGCCCTCGAAAAGAGCATGCACCTCGGCCGCCTTCCCTCTCGCCCACCT	73560016	+	GeneID:51400	PPME1	PME-1;	NM_016147.1	GI:7706644	go_function: hydrolase activity; go_function: serine esterase activity; go_function: protein phosphatase inhibitor activity; go_process: aromatic compound metabolism; go_process: protein amino acid demethylation	protein phosphatase methylesterase-1	103	TRUE	11:73559258-73560445
cg00471562	10	1092373	NCBI:RefSeq	36.1	CGCGGCCGGCACCGCGGCCCTGAGCGCAGGCGGCCCCGGGTCTCAGGCCT	1092776	+	GeneID:22884	WDR37	FLJ40354; KIAA0982; RP11-529L18.2;	NM_014023.3	GI:71164896	synonyms: FLJ40354; KIAA0982; RP11-529L18.2	WD repeat domain 37	403	TRUE	10:1091673-1093370
cg00480209	17	10541414	NCBI:RefSeq	36.1	TTGGGGCCCAGCCGAGGGGACTGCGAGAGTCTTGCTGAGGCAGTTCTGCG	10541697	+	GeneID:56985	C17orf48	MDS006; NBLA03831;	NM_020233.3	GI:37059747	x 006 protein; putative protein product of Nbla03831	hypothetical protein LOC56985	283	TRUE	17:10541005-10542106
cg00480356	15	41880098	NCBI:RefSeq	36.1	CGCCGCCGCATAAGCCCCACCTCACGCCGACTTCCGGCAACTGACACAGC	41879913	+	GeneID:25764	HYPK	HSPC136;	NM_016400.2	GI:21361540	go_function: protein binding	Huntingtin interacting protein K	185	TRUE	15:41879712-41880502
cg00485380	7	26207085	NCBI:RefSeq	36.1	CGCTCAATGAATTGCGGAAGGCTAGAGTCCTGCTAGTTACTACCTCTTGG	26207624	+	GeneID:11335	CBX3	HECH; HP1-GAMMA; HP1Hs-gamma;	NM_016587.2	GI:20544150	heterochromatin protein HP1 gamma; chromobox homolog 3 (Drosophila HP1 gamma); HP1 gamma homolog; heterochromatin-like protein 1; go_component: chromatin; go_component: nucleus; go_function: protein binding; go_function: chromatin binding; go_process: transcription; go_process: chromatin modification; go_process: chromatin assembly or disassembly; go_process: regulation of transcription; DNA-depe…	chromobox homolog 3	539	TRUE	7:26205840-26208732
cg00489401	5	180008481	NCBI:RefSeq	36.1	GGGTGCAGGTGCACGCTGGCACTTGAGACGAATCTTGAGGAGGCGAATCG	180009172	-	GeneID:2324	FLT4	PCL; FLT41; VEGFR3;	NM_182925.1	GI:33667110	isoform 1 is encoded by transcript variant 1; fms-related tyrosine kinase-4 (vascular endothelial growth factor receptor 3); Vascular endothelial growth factor receptor 3; go_component: membrane; go_component: integral to membrane; go_component: integral to plasma membrane; go_function: ATP binding; go_function: receptor activity; go_function: nucleotide binding; go_function: transferase activity…	fms-related tyrosine kinase 4 isoform 1	691	TRUE	5:180008152-180010059
cg00501366	17	7933201	NCBI:RefSeq	36.1	AAGCTCCATGTATGTTTCATTTCTTCTCTGCCTCTGCAGTGCCTAGAACG	7931746	-	GeneID:242	ALOX12B	12R-LOX;	NM_001139.1	GI:4502052	go_function: iron ion binding; go_function: metal ion binding; go_function: lipoxygenase activity; go_function: oxidoreductase activity; go_function: electron transporter activity; go_function: arachidonate 12-lipoxygenase activity; go_process: electron transport; go_process: lipid metabolism; go_process: leukotriene biosynthesis; go_process: epidermis development	arachidonate 12-lipoxygenase; 12R type	1455	FALSE
cg00503458	1	154171063	NCBI:RefSeq	36.1	TGTGCCTACTATAAATGCGGAATCGGGGCTAGCTGAATCCATCTTTATCG	154170812	-	GeneID:22889	KIAA0907	RP11-336K24.1;	NM_014949.2	GI:55741674	synonym: RP11-336K24.1	hypothetical protein LOC22889	251	TRUE	1:154170401-154171084
cg00509670	14	36200064	NCBI:RefSeq	36.1	ACAGTGGCTGAATGTGGCAGAGCCTTGGGCTCCGTAGTGAGTGCCCCACG	36200656	+	GeneID:5083	PAX9		NM_006194.1	GI:7242166	paired domain gene 9; paired box 9; go_component: nucleus; go_function: DNA binding; go_process: development; go_process: transcription; go_process: regulation of transcription; DNA-dependent	paired box gene 9	592	TRUE	14:36199815-36200327
cg00513467	9	21325551	NCBI:RefSeq	36.1	TGTCCTATTTGGTCCCACATACAAGGCAGCTCTAAGAGGCCGGGCTGGCG	21325371	-	GeneID:55958	KLHL9	RP11-380P16.6;	NM_018847.1	GI:24308180	go_function: protein binding	kelch-like 9	180	TRUE	9:21324803-21325711
cg00514407	2	224612870	NCBI:RefSeq	36.1	CGCTGCGGGTACCTCATGCTATCACCATAGCCGGGAATCCAGTTTTCTGG	224612237	-	GeneID:5270	SERPINE2	GDN; PI7; PN1; PNI;	NM_006216.2	GI:34147323	protease inhibitor 7 (protease nexin I); serine (or cysteine) proteinase inhibitor; clade E (nexin; plasminogen activator inhibitor type 1); member 2; glial-derived nexin 1; glial-derived neurite promoting factor; go_component: extracellular region; go_component: extracellular region; go_function: heparin binding; go_function: serine-type endopeptidase inhibitor activity; go_function: serine-type…	plasminogen activator inhibitor type 1; member 2	633	TRUE	2:224611391-224613168
cg00514895	4	8645313	NCBI:RefSeq	36.1	GGGAGGGCGCCCCAAACGCAAATGCCGGAGTCGGGTTACAGTGGGCAGCG	8645335	+	GeneID:8532	CPZ	MGC99682;	NM_003652.2	GI:62388874	isoform 2 precursor is encoded by transcript variant 2; go_function: carboxypeptidase A activity; go_process: proteolysis; go_process: proteolysis	carboxypeptidase Z isoform 2 precursor	22	TRUE	4:8645191-8645719
cg00515905	1	110108030	NCBI:RefSeq	36.1	GGCCGGGTGCCTGGTCCCCCCAGGAGGCTGGTCTTGGAGCAGGTGGTCCG	110108087	-	GeneID:79574	EPS8L3	EPS8R3; FLJ21522; MGC16817;	NM_024526.2	GI:21071013	isoform c is encoded by transcript variant 3; epidermal growth factor receptor pathway substrate 8-related protein 3; EPS8-related protein 3; go_function: receptor activity	epidermal growth factor receptor pathway substrate 8-like protein 3 isoform c	57	FALSE
cg00519627	16	4406651	NCBI:RefSeq	36.1	TGGGGGCGTGGCCCAGGGGGCCGGAGACGGCTGCGATTGGCAGTGGGGCG	4406572	-	GeneID:79585	CORO7	CRN7; FLJ22021; 0610011B16Rik;	NM_024535.1	GI:13375689	go_component: membrane; go_component: Golgi stack; go_component: soluble fraction; go_component: integral to membrane of membrane fraction	coronin 7	79	TRUE	16:4405712-4407051
cg00520708	5	134209165	NCBI:RefSeq	36.1	CGCAGATTACAGGCGTAAGCCACCACGCCCCAGGAATTGTCGCATTCATT	134209269	+	GeneID:134553	FLJ37562		NM_152409.2	GI:40255110		hypothetical protein LOC134553	104	FALSE
cg00521598	1	39112000	NCBI:RefSeq	36.1	GGACCTCGGAAACTGTGGTGACCCATAGGTGCTGGGCTTCTTGGCTCTCG	39111637	-	GeneID:26292	MYCBP	AMY-1;	NM_012333.3	GI:57242776	associate of myc-1; go_component: nucleus; go_component: mitochondrion; go_function: protein binding; go_function: transcription coactivator activity; go_process: transcription; go_process: regulation of transcription; DNA-dependent	c-myc binding protein	363	TRUE	1:39110914-39112118
cg00532335	10	95506851	NCBI:RefSeq	36.1	CGGGGATGATAGTAAAGACATTCTGGAATTAAATGAAAATGATAGGCTAT	95507668	+	GeneID:9211	LGI1	EPT; ETL1; IB1099;	NM_005097.1	GI:4826815	epilepsy; partial; go_process: cell proliferation; go_process: nervous system development	leucine-rich; glioma inactivated 1 precursor	817	FALSE
cg00534274	4	139382791	NCBI:RefSeq	36.1	CGCTGAGAGAGACAGTCTGAAAGCAGAGGAAGACATCGATCAGTAACACC	139382673	-	GeneID:23657	SLC7A11	xCT; CCBR1;	NM_014331.2	GI:18141306	cystine/glutamate transporter; go_component: membrane; go_component: integral to membrane; go_component: integral to membrane; go_function: amino acid permease activity; go_function: cystine:glutamate antiporter activity; go_process: transport; go_process: amino acid transport; go_process: protein complex assembly	solute carrier family 7; (cationic amino acid transporter; y+ system) member 11	118	FALSE
cg00539955	22	42726766	NCBI:RefSeq	36.1	CGTGGGTGTTCCTGCAGCTGGGGCCTGTGCTCCCAGGCACTCATGGCTTC	42726506	+	GeneID:29780	PARVB	CGI-56;	NM_013327.3	GI:51477694	isoform b is encoded by transcript variant 2; affixin; beta-parvin; go_component: cytoskeleton; go_function: actin binding; go_function: protein binding; go_process: cell adhesion	parvin; beta isoform b	260	FALSE
cg00540544	1	199742920	NCBI:RefSeq	36.1	TGGAGTGGTGCAGTGTGCAAAGCCCACTGGTTGGCGTGGCCCGGGACACG	199742873	-	GeneID:1465	CSRP1	CRP; CRP1; CSRP; CYRP; D1S181E; DKFZp686M148;	NM_004078.1	GI:4758085	LIM-domain protein; cysteine-rich protein; go_component: nucleus; go_function: zinc ion binding; go_function: metal ion binding; go_function: zinc ion binding	cysteine and glycine-rich protein 1	47	TRUE	1:199742346-199743316
cg00540769	5	80725248	NCBI:RefSeq	36.1	GAGGATCGCTTTAGCTCAGGAGGTCGAGGCTGCAGCGACCTCTGATGGCG	80725712	-	GeneID:134526	ACOT12	Cach; THEAL; CACH-1; STARD15; MGC105114;	NM_130767.1	GI:18640735	go_function: hydrolase activity; go_function: serine esterase activity; go_function: acetyl-CoA hydrolase activity; go_process: lipid metabolism; go_process: fatty acid metabolism	cytosolic acetyl-CoA hydrolase	464	TRUE	5:80725157-80726371
cg00551244	8	125252957	NCBI:RefSeq	36.1	GAATTCTCACGAGAGCTGATGGTTCTATAAATGGCGGTTTCCCCAGCTCG	125252944	-	GeneID:157376	C8orf78	FLJ32770; MGC126551; MGC126555;	NM_182525.1	GI:32698879	synonyms: FLJ32770; MGC126551; MGC126555	hypothetical protein LOC157376	13	TRUE	8:125252840-125253126
cg00563845	3	58293345	NCBI:RefSeq	36.1	GTACGGTCCCCGAAAAGCCCAGTTCTGAGAGGCCTGGTTTGGAAATCTCG	58293657	+	GeneID:54899	PXK	FLJ20335;	NM_017771.2	GI:31543451	PX serine/threonine kinase; modulator of Na;K-ATPase long form; modulator of Na;K-ATPase short form; PX ser/thr kinase v2; PX serine/threonine kinase isoform 5; PX serine/threonine kinase isoform 4; PX serine/threonine kinase isoform 3; go_component: cytoplasm; go_function: ATP binding; go_function: ATP binding; go_function: nucleotide binding; go_function: transferase activity; go_function: nucl…	PX domain containing serine/threonine kinase	312	TRUE	3:58293322-58294326
cg00569620	3	113180343	NCBI:RefSeq	36.1	CGGGCTGATAGATACTACAGAGCTGGAAGCTCAGAAAGGAACCCTATCCA	113180589	+	GeneID:55347	ABHD10	FLJ11342;	NM_018394.1	GI:8923000	go_function: hydrolase activity; go_process: aromatic compound metabolism	abhydrolase domain containing 10	246	TRUE	3:113180107-113181019
cg00572797	1	25107166	NCBI:RefSeq	36.1	CGCGGTGATCCGAACCTCTACGACACGCGGTGATCCAAACCTCTATGACA		-	GeneID:864	RUNX3	AML2; CBFA3; PEBP2aC;	NT_004610.18	runt-related transcription factor 3 isoform 2	isoform 2 is encoded by transcript variant 2; core-binding factor; runt domain; alpha subunit 3; encoded by distal 5' portion of the mRNA; go_component: nucleus; go_function: ATP binding; go_function: transcription factor activity; go_process: transcription; go_process: cell proliferation; go_process: regulation of transcription; DNA-dependent; go_process: transcription from RNA polymerase II pro…			TRUE	1:25106952-25107518
cg00573606	2	237987419	NCBI:RefSeq	36.1	CGCAGTGAGTGGGAAAAGTATGCATCCTATTCAAACCTAATTGAATCGAG	237987559	-	GeneID:1293	COL6A3	DKFZp686D23123; DKFZp686K04147;	NM_004369.2	GI:55743097	isoform 1 precursor is encoded by transcript variant 1; collagen VI; alpha-3 polypeptide; go_component: cytoplasm; go_component: collagen type VI; go_component: extracellular matrix (sensu Metazoa); go_function: protein binding; go_function: structural molecule activity; go_function: serine-type endopeptidase inhibitor activity; go_process: cell adhesion; go_process: phosphate transport; go_proce…	alpha 3 type VI collagen isoform 1 precursor	140	FALSE
cg00577167	9	103237496	NCBI:RefSeq	36.1	CGATAGGAGTGTTCAAGTTGTTTTTCCTAGATCAGAGACTCACAAGGGCC	103237926	-	GeneID:229	ALDOB		NM_000035.2	GI:40354204	aldolase B; fructose-bisphosphatase; aldolase 2; go_component: cytoplasm; go_function: lyase activity; go_function: fructose-bisphosphate aldolase activity; go_process: glycolysis; go_process: fructose metabolism	aldolase B	430	FALSE
cg00584022	12	25294434	NCBI:RefSeq	36.1	TGCTGCATTTGGCATCTCTAGGACGAAGGTATAAACTTCTCCCTCGAGCG	25295121	-	GeneID:3845	KRAS	KRAS1; KRAS2; RASK2; KI-RAS; C-K-RAS; K-RAS2A; K-RAS2B; K-RAS4A; K-RAS4B;	NM_004985.3	GI:34485723	isoform b is encoded by transcript variant b; Kirsten rat sarcoma-2 viral (v-Ki-ras2) oncogene homolog; v-Ki-ras2 Kirsten rat sarcoma 2 viral oncogene homolog; transforming protein p21; c-Kirsten-ras protein; K-ras p21 protein; oncogene KRAS2; c-K-ras protein; PR310 c-K-ras oncogene; cellular c-Ki-ras2 proto-oncogene; go_component: membrane; go_function: GTP binding; go_function: GTPase activity;…	c-K-ras2 protein isoform b	687	TRUE	12:25294308-25295937
cg00587613	11	66976799	NCBI:RefSeq	36.1	AGCTTCCATGGTAGTGTCCATTTGGGGTCCCCAGAGTCCTGCTGGACACG	66976776	-	GeneID:390212	GPR152	PGR5;	NM_206997.1	GI:46243670	G protein-coupled receptor PGR5; go_component: membrane; go_component: integral to membrane; go_function: receptor activity; go_function: rhodopsin-like receptor activity; go_process: signal transduction; go_process: G-protein coupled receptor protein signaling pathway	G protein-coupled receptor 152	23	FALSE
cg00597076	17	1342630	NCBI:RefSeq	36.1	CGGTCTAACGCCGGGATGGCCACTTGGTTCTGCTTCAACTGCAGCCCCAG	1342745	-	GeneID:4641	MYO1C	myr2; MYO1E;	NM_033375.3	GI:46485767	myosin-I beta; go_component: myosin; go_component: unconventional myosin; go_function: ATP binding; go_function: actin binding; go_function: motor activity; go_function: calmodulin binding; go_function: nucleotide binding; go_process: detection of sound	myosin IC	115	TRUE	17:1342450-1342678
cg00600684	10	122600148	NCBI:RefSeq	36.1	AGGTCAGACCCAGTCCTTCCCTCCTTTGTGTTCAGTGTTGGGTTTATACG	122600685	+	GeneID:55717	BRWD2	DR11; WDR11; WDR15; FLJ42531; DKFZp434L1715;	NM_018117.10	GI:22547233	WD40 repeat domain 11 protein; WD repeat domain 15; WD repeat domain 11; go_component: integral to membrane	bromodomain and WD repeat domain containing 2	537	FALSE
cg00603172	2	242146552	NCBI:RefSeq	36.1	CGCATGCCCTTTGTATTGTAGATGGATTATTGGATTCGCATTTATTGAAG	242146865	+	GeneID:666	BOK	BOKL; BCL2L9; MGC4631;	NM_032515.3	GI:34335395	go_component: cellular component unknown; go_function: protein dimerization activity; go_process: regulation of apoptosis; go_process: induction of apoptosis	BCL2-related ovarian killer	313	TRUE	2:242146490-242147939
cg00605270	1	28134139	NCBI:RefSeq	36.1	CGCCTTGGAGGACTTGGAACACCTGTAACAGGACAAGGAGTTCTGCTCAG	28134091	+	GeneID:27293	SMPDL3B	ASML3B;	NM_014474.2	GI:57242797	isoform 1 is encoded by transcript variant 1; acid sphingomyelinase-like phosphodiesterase; go_function: hydrolase activity; acting on glycosyl bonds; go_process: carbohydrate metabolism	acid sphingomyelinase-like phosphodiesterase 3B isoform 1	48	FALSE
cg00612467	4	109130526	NCBI:RefSeq	36.1	GACACGGAACGCATGAACTGCCTGGTGACGAAGGCCATGGTGTGGCAGCG	109130451	+	GeneID:3033	HADHSC	SCHAD;	NM_005327.1	GI:4885386	L-3-hydroxyacyl-CoA dehydrogenase; short chain; go_component: mitochondrion; go_function: oxidoreductase activity; go_function: 3-hydroxyacyl-CoA dehydrogenase activity; go_process: lipid metabolism; go_process: fatty acid metabolism	L-3-hydroxyacyl-Coenzyme A dehydrogenase; short chain	75	TRUE	4:109130117-109131089
cg00613255	11	2138952	NCBI:RefSeq	36.1	CGCAAAGGCCCTTGGAACAGACCTGCTTGATGGCCTCTTCTGATGCAGCC	2139000	-	GeneID:3630	INS		NM_000207.1	GI:4557670	proinsulin; go_component: extracellular region; go_function: protein binding; go_function: hormone activity; go_function: insulin receptor binding; go_function: insulin-like growth factor binding; go_process: cell death; go_process: glucose transport; go_process: glucose transport; go_process: physiological process; go_process: cell-cell signaling; go_process: glucose metabolism; go_process: carb…	proinsulin precursor	48	FALSE
cg00613344	1	220789293	NCBI:RefSeq	36.1	GTCTGAATGTGTCCCTCCCTACCTCAGATTCATAGATTGGAATGTAATCG	220788067	-	GeneID:79802	KIAA1822L	FLJ13840; RP11-378J18.1;	NM_024746.2	GI:21362001	KIAA0319-like	hypothetical protein LOC79802	1226	FALSE
cg00615241	19	790689	NCBI:RefSeq	36.1	CGGATGTCTCCAGGCCTCACACAGGGACCCCTGGGGGCAGAATCACCCCA	791985	+	GeneID:5657	PRTN3	MBT; P29; ACPA; AGP7; PR-3; C-ANCA;	NM_002777.3	GI:71361687	myeloblastin; go_component: cellular component unknown; go_function: protein binding; go_function: serine-type endopeptidase activity; go_process: proteolysis; go_process: collagen catabolism; go_process: positive regulation of cell proliferation	proteinase 3 (serine proteinase; neutrophil; Wegener granulomatosis autoantigen)	1296	FALSE
cg00616369	2	232037340	NCBI:RefSeq	36.1	CGCCACTTGTCCGCTTCACACTCCGCCGCCATCATGGTGAAGCTCGCGAA	232037449	-	GeneID:4691	NCL	C23; FLJ45706;	NM_005381.2	GI:55956787	go_component: nucleus; go_component: nucleolus; go_function: DNA binding; go_function: RNA binding; go_function: nucleotide binding; go_function: nucleic acid binding	nucleolin	109	TRUE	2:232036571-232039010
cg00617305	1	200124563	NCBI:RefSeq	36.1	CGCCCAGGAGTCCACCCACCAGCGACGCCCACCTAGCCTCTGGAGCTGGG	200124655	+	GeneID:149345	TMEM58	C1orf40; MGC129813;	NM_198149.1	GI:39930574	synonyms: C1orf40; MGC129813	transmembrane protein 58	92	TRUE	1:200124397-200124974
cg00620223	1	212843527	NCBI:RefSeq	36.1	CGGATTAGTGTCCCAGACCCTACTCGGTCACGGACTCACACTTTAGGGGA	212843155	+	GeneID:1063	CENPF	CENF; PRO1779;	NM_016343.3	GI:55770833	centromere protein F (400kD); centromere protein F (350/400kD; mitosin); CENP-F kinetochore protein; AH antigen; cell-cycle-dependent 350K nuclear protein; go_component: chromatin; go_component: cytoplasm; go_component: kinetochore; go_component: spindle pole; go_component: nuclear matrix; go_component: nuclear envelope; go_component: outer kinetochore of condensed chromosome; go_component: outer…	centromere protein F (350/400kD)	372	TRUE	1:212842815-212843683
cg00620857	14	73127573	NCBI:RefSeq	36.1	AAGTGATCCTCCTGTCTCAGCCTTCGGAGTAGCTGTGACTACAGACAGCG	73128163	+	GeneID:122970	ACOT4	PTE1B; PTE2B; PTE-Ib;	NM_152331.2	GI:63999751	go_component: peroxisome; go_function: hydrolase activity; go_function: serine esterase activity; go_function: palmitoyl-CoA hydrolase activity; go_process: lipid metabolism	peroxisomal acyl-CoA thioesterase 2B	590	TRUE	14:73126775-73129376
cg00627233	2	79105419	NCBI:RefSeq	36.1	CTTAACATCAATCAAGGCAGTGGCACCAAATTGCATTGCTCATATCCACG	79106334	+	GeneID:130120	REG3G	PAP1B; PAPIB; UNQ429; REG-III; MGC118999; MGC119001;	NM_001008387.1	GI:56699412	regenerating gene III; LPPM429; PAP IB protein; go_function: sugar binding; go_process: acute-phase response; go_process: inflammatory response	regenerating islet-derived 3 gamma	915	FALSE
cg00629217	4	54120106	NCBI:RefSeq	36.1	TATTTAAACTCTTTAGCCCTGCCTCTGATGCCAAATTCCTAATGACTACG	54119124	-	GeneID:84708	LNX1	LNX; MPDZ; PDZRN2;	NM_032622.1	GI:14249127	go_function: ligase activity; go_function: zinc ion binding; go_function: metal ion binding; go_function: protein binding; go_process: ubiquitin cycle	multi-PDZ-domain-containing protein	982	FALSE
cg00633969	3	123767240	NCBI:RefSeq	36.1	CGGGGAGCTATTAAGAGCTCTAAAGTGTGCGGATTAAGTTTTACTATAGA	123766114	-	GeneID:83666	PARP9	BAL; BAL1; MGC:7868; DKFZp666B0810; DKFZp686M15238;	NM_031458.1	GI:13899296	go_component: nucleus; go_function: NAD+ ADP-ribosyltransferase activity; go_process: cell migration; go_process: protein amino acid ADP-ribosylation	B aggressive lymphoma gene	1126	FALSE
cg00647741	19	63385262	NCBI:RefSeq	36.1	ACCAAAAAAACCAACAACCCGTGGAACAAGTTTAGCAGGCAGTGTACACG	63386208	+	GeneID:10782	ZNF274	ZF2; HFB101; DKFZp686K08243;	NM_016324.2	GI:19743797	isoform b is encoded by transcript variant ZNF274b; KRAB zinc finger protein HFB101; zinc finger protein zfp2; go_component: nucleolus; go_function: zinc ion binding; go_function: metal ion binding; go_function: transcription factor activity; go_function: transcription corepressor activity; go_process: transcription; go_process: regulation of transcription; DNA-dependent	zinc finger protein 274 isoform b	946	FALSE
cg00651216	6	44321698	NCBI:RefSeq	36.1	CGGCCTCCAAGAGCTCCGGCTGCCCTGCACTGGTTCCCAGAGACTCCCTC	44322827	+	GeneID:3326	HSP90AB1	HSPC2; HSPCB; D6S182; HSP90B; HSP90-BETA;	NM_007355.2	GI:20149593	heat shock 90kD protein 1; beta; heat shock protein beta; go_component: cytoplasm; go_function: ATP binding; go_function: TPR domain binding; go_function: nucleotide binding; go_function: unfolded protein binding; go_function: unfolded protein binding; go_function: nitric-oxide synthase regulator activity; go_process: protein folding; go_process: response to unfolded protein; go_process: response…	heat shock 90kDa protein 1; beta	1129	TRUE	6:44321646-44323854
cg00658626	12	109769362	NCBI:RefSeq	36.1	CGGTCGCGGTCCCCAGTCCATTCATATCTCGCTGCCCTAAGCGTTGAAAG	109769194	+	GeneID:160762	CCDC63	FLJ35843;	NM_152591.1	GI:22749216	synonym: FLJ35843	hypothetical protein LOC160762	168	TRUE	12:109768778-109769574
cg00659129	8	131483796	NCBI:RefSeq	36.1	TGTATATTCTTCTATATCTGCCTTCTTCCTGCAACTGGTTTCCTTTGCCG	131483399	-	GeneID:50807	DDEF1	PAP; PAG2; AMAP1; ASAP1; ZG14P; KIAA1249;	NM_018482.2	GI:46094080	go_component: membrane; go_function: metal ion binding; go_function: protein binding; go_function: GTPase activator activity; go_process: regulation of GTPase activity	development and differentiation enhancing factor 1	397	FALSE
cg00661202	3	14141503	NCBI:RefSeq	36.1	CGTCCTGGAAACTATACGGTCCGGGACATTGCAGTACCTCATTGATGCGC	14141323	-	GeneID:131474	CHCHD4	FLJ31709;	NM_144636.1	GI:21389468	synonym: FLJ31709	coiled-coil-helix-coiled-coil-helix domain containing 4	180	TRUE	3:14140551-14142142
cg00662556	18	73092352	NCBI:RefSeq	36.1	CGCAAGCCAATGGCACGCTCCAGCAGCGGCCAGGAAGCCTCTCTGCACAG		+	GeneID:2587	GALR1	GALNR; GALNR1;	NT_025004.13	galanin receptor 1	go_component: plasma membrane; go_component: integral to membrane; go_component: integral to membrane; go_function: receptor activity; go_function: galanin receptor activity; go_function: galanin receptor activity; go_function: rhodopsin-like receptor activity; go_process: ion transport; go_process: digestion; go_process: signal transduction; go_process: synaptic transmission; go_process: neurope…			TRUE	18:73090255-73093032
cg00666446	1	245308896	NCBI:RefSeq	36.1	CTGCAGTCCTTTTCTAAGGCATGGATTCTGCCCTGTGCTGAGACCTGGCG	245308692	-	GeneID:93474	ZNF670	FLJ12606; MGC12466;	NM_033213.2	GI:55769531	go_component: nucleus; go_function: zinc ion binding; go_function: nucleic acid binding; go_process: regulation of transcription; DNA-dependent	zinc finger protein 670	204	TRUE	1:245308044-245308919
cg00669623	1	1645727	NCBI:RefSeq	36.1	TTTTGGAGTCCTGGACCTGAGCAAGCGCTGTTTTATGCGTCATCATCCCG	1645623	-	GeneID:985	CDC2L2	CDC2L3; p58GTA; PITSLRE; CDK11-p46; CDK11-p58; MGC131975; CDK11-p110;	NM_033527.1	GI:16357479	isoform 2 is encoded by transcript variant 2; cell division cycle 2-like 3; cell division cycle 2-like 2; p58GTA protein kinase; PITSLRE protein kinase beta; galactosyltransferase associated protein kinase; PITSLRE B; cell division cycle 2-like 2; isoform 2; go_component: nucleus; go_function: ATP binding; go_function: ATP binding; go_function: nucleotide binding; go_function: protein binding; go…	cell division cycle 2-like 2 isoform 2	104	TRUE	1:1644546-1646532
cg00672638	5	142129583	NCBI:RefSeq	36.1	AAATGTTATTTGCATCTTAAAATTACCAGCTCTTGCCTGCAGTCTTCCCG	142130476	+	GeneID:23092	ARHGAP26	GRAF; OPHN1L; OPHN1L1; KIAA0621;	NM_015071.2	GI:32189359	GTPase regulator associated with focal adhesion kinase pp125(FAK); GTPase regulator associated with FAK; go_component: cellular component unknown; go_function: Rho GTPase activator activity; go_process: nervous system development; go_process: actin cytoskeleton organization and biogenesis	GTPase regulator associated with the focal adhesion kinase pp125	893	TRUE	5:142129339-142131285
cg00678539	15	54544917	NCBI:RefSeq	36.1	CGCATGGAGCATCCCGCACACTAAGTGCCTAGTCAGCCAGGTCTCTGCTA	54544627	-	GeneID:55329	MNS1	FLJ11222;	NM_018365.1	GI:8922949	synonym: FLJ11222	meiosis-specific nuclear structural protein 1	290	TRUE	15:54544353-54544942
cg00679556	6	30188761	NCBI:RefSeq	36.1	CCCATCTGTTTTCCTCTCTTTATAATATTTTCTAGATCCTAAATTTTACG	30188846	-	GeneID:11074	TRIM31	RNF; HCG1; HCGI; C6orf13;	NM_007028.3	GI:62865603	isoform alpha is encoded by transcript variant 1; ring finger protein; go_component: ubiquitin ligase complex; go_function: zinc ion binding; go_function: metal ion binding; go_function: ubiquitin-protein ligase activity; go_process: protein ubiquitination	tripartite motif protein 31 isoform alpha	85	FALSE
cg00684178	2	242400753	NCBI:RefSeq	36.1	CGCTGGGCTCTAGCTCTGTATCTGTGCTCCTGGCAGGCCAGCACCCCATC	242400746	+	GeneID:129807	NEU4	MGC18222; MGC102757;	NM_080741.1	GI:18152772	neuraminidase 4; go_component: membrane; go_component: lysosome; go_component: organelle inner membrane; go_function: protein binding; go_function: exo-alpha-sialidase activity; go_function: hydrolase activity; acting on glycosyl bonds; go_process: carbohydrate metabolism	sialidase 4	7	FALSE
cg00687674	15	67160314	NCBI:RefSeq	36.1	ACACCTGGATGCGGAATGCACAGAGCCCTTGTGTGCAGCAGCAGAAAACG	67160256	+	GeneID:283673	TMEM84	FLJ33768; MGC126643; MGC126645;	NM_173610.1	GI:27734706	synonyms: FLJ33768; MGC126643; MGC126645	hypothetical protein LOC283673	58	FALSE
cg00702729	7	99595590	NCBI:RefSeq	36.1	CGCCTAGCTACCCCTGAGCTCCAGTACAAGGACAAGCTGGATGCCAAGCA	99594238	-	GeneID:55262	FLJ10925	DKFZp761G0712;	NM_018275.3	GI:34222158	synonym: DKFZp761G0712	hypothetical protein LOC55262	1352	TRUE	7:99595582-99595921
cg00712898	1	109036731	NCBI:RefSeq	36.1	TGCGGCTGCGAGTTGCCTGTCAGCGCGGGGCTGTTGTTAGCCATGTTGCG	109036661	+	GeneID:55119	PRPF38B	FLJ10330; MGC41809; RP11-293A10.1;	NM_018061.1	GI:8922357	sarcoma antigen NY-SAR-27	PRP38 pre-mRNA processing factor 38 (yeast) domain containing B	70	TRUE	1:109036114-109037502
cg00714377	20	34708129	NCBI:RefSeq	36.1	TTCCCCAAGTTCCTGTTTCTAGGGGAGCAGCTGCTGCCTTGTCATGATCG	34707972	-	GeneID:84174	SLA2	SLAP2; SLAP-2; FLJ21992; MGC49845; C20orf156;	NM_032214.2	GI:28416422	isoform a is encoded by transcript variant 1; Src-like adapter protein-2; go_component: cytoplasm; go_component: plasma membrane; go_component: endosome membrane; go_function: SH3/SH2 adaptor activity; go_function: protein N-terminus binding; go_process: T cell activation; go_process: B cell mediated immunity; go_process: regulation of immune response; go_process: negative regulation of B cell ac…	Src-like-adaptor 2 isoform a	157	FALSE
cg00727590	22	29866549	NCBI:RefSeq	36.1	GTATGGGGTGATCTTGGGCTTGTAACCGAATCCACCAGCCGGGCAGGACG	29866469	-	GeneID:50487	PLA2G3	GIII-SPLA2;	NM_015715.2	GI:51873062	group III secreted phospholipase A2; phosphatidylcholine 2-acylhydrolase GIII; go_component: extracellular space; go_function: hydrolase activity; go_function: calcium ion binding; go_function: calcium-dependent phospholipase A2 activity; go_process: lipid catabolism; go_process: phospholipid metabolism	phospholipase A2; group III precursor	80	FALSE
cg00727947	19	59516912	NCBI:RefSeq	36.1	CGCCCGGCTGGTGGGGAGTTGATTTCTATGTAATTCCCGATTATTATCTA	59516221	-	GeneID:353514	LILRA5	CD85; LIR9; CD85F; ILT11; LILRB7;	NM_181879.1	GI:32895360	isoform 3 is encoded by transcript variant 3; immunoglobulin-like transcript 11 protein; leukocyte Ig-like receptor 9; leukocyte immunoglobulin-like receptor; subfamily B (with TM and ITIM domains); member 7	leukocyte immunoglobulin-like receptor subfamily A member 5 isoform 3	691	TRUE	19:59516570-59517001
cg00729708	15	98901965	NCBI:RefSeq	36.1	TAGAAACCCACGAAAGTAATTACAAACTTGTTAACCGCTGGGCACTGTCG	98902448	-	GeneID:204219	LASS3	MGC27091;	NM_178842.2	GI:31341477	go_component: nucleus; go_component: integral to membrane; go_function: transcription factor activity; go_process: lipid biosynthesis; go_process: regulation of transcription; DNA-dependent	hypothetical protein LOC204219	483	TRUE	15:98901825-98902776
cg00729875	1	99884301	NCBI:RefSeq	36.1	CCTCATTACATGTGTCTGTCTGGCCTGATCTGTGCATCTGCTCGGAGACG	99884182	+	GeneID:54873	PALMD	PALML; C1orf11; FLJ20271;	NM_017734.2	GI:16306484	paralemnin-like; go_component: membrane; go_process: regulation of cell shape	palmdelphin	119	FALSE
cg00733682	19	12266568	NCBI:RefSeq	36.1	CGCGACAAAAGCCACCACAGATGTCCCAGGGCGTCTCTCAGTGACAGAAT	12266637	-	GeneID:51710	ZNF44	ZNF; KOX7; ZNF58; GIOT-2; ZNF504; DKFZp686L21136;	NM_016264.2	GI:56676339	gonadotropin inducible transcription repressor-2; zinc finger protein 58; DNA-binding protein; go_component: nucleus; go_component: intracellular; go_function: DNA binding; go_function: zinc ion binding; go_function: metal ion binding; go_function: protein binding; go_function: nucleic acid binding; go_process: transcription; go_process: regulation of transcription; DNA-dependent	zinc finger protein 44	69	TRUE	19:12265979-12267261
cg00736326	7	98761814	NCBI:RefSeq	36.1	CGCCCCCAGGGTCCTACTTGCACCTCTGCTGGGGGCATTTGTCACCGTCT	98761446	+	GeneID:10552	ARPC1A	Arc40; SOP2L; SOP2Hs;	NM_006409.2	GI:22907051	actin related protein 2/3 complex; subunit 1A (41 kD); actin binding protein (Schizosaccharomyces pombe sop2-like); SOP2-like protein	actin related protein 2/3 complex subunit 1A	368	TRUE	7:98761005-98762002
cg00750606	1	20771708	NCBI:RefSeq	36.1	TGAATATCCCAGAGGTATCCCGACACCTAGACTGGAACCTCAAACCTTCG	20771713	+	GeneID:978	CDA	CDD; hscd;	NM_001785.1	GI:11386156	small cytidine deaminase; go_function: zinc ion binding; go_function: metal ion binding; go_function: hydrolase activity; go_function: cytidine deaminase activity; go_process: cytidine metabolism; go_process: nucleobase; nucleoside; nucleotide and nucleic acid metabolism	cytidine deaminase	5	FALSE
cg00751288	5	130534684	NCBI:RefSeq	36.1	GGGTCAGGAGCCCCAGCCTCCAGAGACTCCAGACAGTTTTCTCAAGGACG	130534576	+	GeneID:90624	LOC90624	MGC24679;	NM_181705.1	GI:32171235	synonym: MGC24679	hypothetical protein LOC90624	108	TRUE	5:130534170-130534775
cg00762512	4	39137001	NCBI:RefSeq	36.1	TTTATGACAAGCAGCCAAGCTGCTCCACGATTGGCTGCTTTAGCCTTACG	39137060	+	GeneID:11019	LIAS	LAS; LIP1; HUSSY-01; MGC23245;	NM_194451.1	GI:37577163	isoform 2 precursor is encoded by transcript variant 2; lipoate synthase; go_component: mitochondrion; go_function: iron ion binding; go_function: metal ion binding; go_function: catalytic activity; go_function: lipoate synthase activity; go_function: 3 iron; 4 sulfur cluster binding; go_process: lipoate biosynthesis	lipoic acid synthetase isoform 2 precursor	59	TRUE	4:39136382-39137377
cg00763889	11	63087120	NCBI:RefSeq	36.1	CGCAAACTTTGGCCACAGTAGAACCAGACCCCATGCGGCAGCTGAGGCTG	63087431	-	GeneID:54979	HRASLS2	FLJ20556;	NM_017878.1	GI:8923525	synonym: FLJ20556	HRAS-like suppressor 2	311	FALSE
cg00783759	4	129202891	NCBI:RefSeq	36.1	CGCCGGCAAGTCCCGCAAGTCGCCCCTGCCCGCACCCTGCCAGTGCCCAA	129201953	+	GeneID:55132	LARP2	MGC75174; DKFZp686L13217;	NM_178043.1	GI:30061564	isoform 2 is encoded by transcript variant 2	La ribonucleoprotein domain family member 2 isoform 2	938	TRUE	4:129201183-129203091
cg00810473	15	62230762	NCBI:RefSeq	36.1	CGGAGCACTCACTGATGCCAGGAACTGGCGAGCGAAAATGTCACCCAACC	62230969	+	GeneID:79856	SNX22	FLJ13952;	NM_024798.2	GI:71772837	go_process: protein transport; go_process: intracellular signaling cascade	sorting nexin 22	207	TRUE	15:62230536-62232047
cg00810495	1	84717455	NCBI:RefSeq	36.1	CGCTAGATGTGTTTTGTGAGTTTTAGCCATTCAAGAAAATAGTAAAGCTG	84717546	+	GeneID:80135	BXDC5	RPF1; FLJ12475; DKFZp761G0415; DKFZp761M0215; RP11-118B23.1;	NM_025065.5	GI:38569467	RNA processing factor 1 (RPF1); 2310066N05Rik; go_component: nucleolus; go_function: rRNA binding; go_process: rRNA processing	RNA processing factor 1	91	TRUE	1:84717429-84718095
cg00815440	19	34395868	NCBI:RefSeq	36.1	TGGTTGGAAGGTCGTCCCTGTGACCGGCTTGGCGGTTGGAGCGGCTGTCG	34395954	-	GeneID:7386	UQCRFS1	RIS1;	NM_006003.1	GI:5174742	go_component: mitochondrion; go_component: inner membrane; go_component: integral to membrane; go_component: ubiquinol-cytochrome-c reductase complex (sensu Eukaryota); go_function: iron ion binding; go_function: metal ion binding; go_function: oxidoreductase activity; go_function: 2 iron; 2 sulfur cluster binding; go_function: ubiquinol-cytochrome-c reductase activity; go_process: electron trans…	ubiquinol-cytochrome c reductase; Rieske iron-sulfur polypeptide 1	86	TRUE	19:34395254-34396254
cg00815583	8	28404042	NCBI:RefSeq	36.1	TTTACCTGTTGGCCACTCTTAAAACCTGGCACAGTGGAGCCTGCATTTCG	28403703	-	GeneID:157574	FBXO16	FBX16; MGC125923; MGC125924; MGC125925;	NM_172366.2	GI:30089920	go_process: ubiquitin cycle	F-box only protein 16	339	TRUE	8:28403582-28404118
cg00816620	1	183394124	NCBI:RefSeq	36.1	CGGGACGATCAGTAAAAGGGATTTAGGACTATAACTCACAGAAGCTCCAC	183392706	-	GeneID:81627	C1orf25	MST070; MSTP070; MGC25112; MGC57134; bG120K12.3;	NM_030934.3	GI:30181237	go_component: nucleus; go_function: RNA binding; go_function: zinc ion binding; go_function: transferase activity; go_function: methyltransferase activity; go_function: tRNA (guanine-N2-)-methyltransferase activity; go_process: tRNA processing	N2;N2-dimethylguanosine tRNA methyltransferase-like	1418	FALSE
cg00818872	1	152806895	NCBI:RefSeq	36.1	AGCAGGCGGAGGCTTTTCCGGCTGCTCTTCCAGGGAATACAATTGGGACG	152806881	+	GeneID:1141	CHRNB2	EFNL3;	NM_000748.1	GI:4502832	go_component: integral to membrane; go_component: postsynaptic membrane; go_component: nicotinic acetylcholine-gated receptor-channel complex; go_function: ion channel activity; go_function: acetylcholine receptor activity; go_function: extracellular ligand-gated ion channel activity; go_function: nicotinic acetylcholine-activated cation-selective channel activity; go_process: ion transport; go_p…	cholinergic receptor; nicotinic; beta polypeptide 2 (neuronal)	14	TRUE	1:152806551-152807339
cg00830029	12	2814163	NCBI:RefSeq	36.1	CGCCGGCTCAAACAGGCCACCCAGTTCCTGCACAAGGACTCGGCCGACCT	2814450	-	GeneID:83714	NRIP2	DKFZP761G1913;	NM_031474.1	GI:13899326	go_function: receptor activity	nuclear receptor interacting protein 2	287	FALSE
cg00834796	5	147142117	NCBI:RefSeq	36.1	CGGGAGTCATTGTTCAAGTTCAGGCCAGAAATGTATACACAGGTCAAATA	147142445	-	GeneID:9832	JAKMIP2	JAMIP2; KIAA0555;	NM_014790.3	GI:45238581	synonyms: JAMIP2; KIAA0555	Jak and microtubule interacting protein 2	328	FALSE
cg00842351	9	70979473	NCBI:RefSeq	36.1	ACTGTCTTGAACCCGGTGTCCTGGATTTCTGCTGGCTTGGAGGCATCTCG	70978909	+	GeneID:9414	TJP2	ZO2; X104; ZO-2; MGC26306;	NM_201629.1	GI:42518064	isoform 2 is encoded by transcript variant 2; Friedreich ataxia region gene X104 (tight junction protein ZO-2); go_component: nucleus; go_component: membrane; go_component: tight junction; go_component: integral to plasma membrane; go_function: protein binding; go_function: guanylate kinase activity	tight junction protein 2 (zona occludens 2) isoform 2	564	TRUE	9:70978317-70979512
cg00845900	7	129718965	NCBI:RefSeq	36.1	CGGCAAAGAAAACAGAGAGGATCAGTGGGATTACTAAGAGAAGACATCAA	129720230	+	GeneID:51200	CPA4	CPA3;	NM_016352.2	GI:61743915	carboxypeptidase A3; go_component: cellular component unknown; go_function: metal ion binding; go_function: carboxypeptidase activity; go_function: metallopeptidase activity; go_function: carboxypeptidase A activity; go_process: proteolysis; go_process: histone acetylation	carboxypeptidase A4 preproprotein	1265	FALSE
cg00846036	11	84311774	NCBI:RefSeq	36.1	CTTATTTACTGCAATGTTCTTTGCATGTTACTGTGCACTCCGGACTAACG	84312086	-	GeneID:1740	DLG2	PSD-93; DKFZp781D1854; DKFZp781E0954;	NM_001364.1	GI:4557526	membrane-associated guanylate kinase; channel-associated protein of synapses; 110kDa; discs large homolog 2; go_component: plasma membrane; go_function: protein binding; go_function: guanylate kinase activity	chapsyn-110	312	FALSE
cg00848461	5	176664699	NCBI:RefSeq	36.1	CGGAGTTGTCCTAAGTTCTAAATGCAAAGCGCTCCCATCTGGCATCTATG	176663311	-	GeneID:53917	RAB24		NM_130781.1	GI:18640747	isoform 2 is encoded by transcript variant 2; go_component: Golgi stack; go_component: endoplasmic reticulum; go_function: GTP binding; go_function: nucleotide binding; go_process: autophagy; go_process: protein transport; go_process: small GTPase mediated signal transduction	RAB24 gene product isoform 2	1388	FALSE
cg00849368	5	94916167	NCBI:RefSeq	36.1	TGAATAGGGCGGTGCCTTGTGGGGCCTCTGGGTGGACCGCCTCAGGTGCG	94916621	+	GeneID:153642	ARSK	TSULF; DKFZp313G1735;	NM_198150.1	GI:39930576	telethon sulfatase; go_function: hydrolase activity; go_function: calcium ion binding; go_function: sulfuric ester hydrolase activity; go_process: metabolism	arylsulfatase K	454	TRUE	5:94916038-94917087
cg00859655	11	7651100	NCBI:RefSeq	36.1	TGTTGGGGAGTCCCCAGGCCCTAAGTCACGGGGCACCTCTTAGAGCTACG	7651397	-	GeneID:51700	CYB5R2	B5R.2;	NM_016229.2	GI:47778922	isoform 1 is encoded by transcript variant 1; cytochrome b5 reductase b5R.2; go_component: membrane; go_component: soluble fraction; go_function: FAD binding; go_function: NAD binding; go_function: oxidoreductase activity; go_function: cytochrome-b5 reductase activity; go_process: electron transport; go_process: electron transport	cytochrome b5 reductase b5R.2 isoform 1	297	FALSE
cg00871453	8	124153821	NCBI:RefSeq	36.1	ATCATAGACGCGAGGAATTGGCTTGGGAATTCCGCCCTTTGGGAGCCTCG	124154101	+	GeneID:93594	WDR67	Gm85; MGC21654;	NM_145647.1	GI:21717806	unknown MGC21654 product	WD repeat domain 67	280	TRUE	8:124153730-124155870
cg00881086	3	133924632	NCBI:RefSeq	36.1	AGCGTTTGTAGAGCAGCTGGGACCCAGGCCTGTGCTCCCTGTGAGGCACG	133923966	-	GeneID:27031	NPHP3	NPH3; FLJ30691; FLJ36696; KIAA2000; DKFZp667K242; DKFZp781K1312;	NM_153240.3	GI:34304359	nephrocystin 3; go_function: binding	nephronophthisis 3	666	TRUE	3:133923089-133924661
cg00886554	4	56197355	NCBI:RefSeq	36.1	GGGTCAGAAACTCAGGCTAGGGGGCTCGGGTCCTGCTGCAGGGTGGGGCG	56197222	-	GeneID:10874	NMU		NM_006681.1	GI:5729946	go_function: receptor binding; go_process: digestion; go_process: signal transduction; go_process: neuropeptide signaling pathway; go_process: regulation of smooth muscle contraction	neuromedin U	133	TRUE	4:56196371-56197553
cg00887700	12	122684313	NCBI:RefSeq	36.1	CGCTCCCCTGACCACCACTTGCTCTGCGCTGAGGTGCTGGGACAGCCATG	122684200	-	GeneID:1967	EIF2B1	EIF2B; EIF-2B; EIF2BA; MGC117409; MGC125868; MGC125869; EIF-2Balpha;	NM_001414.2	GI:77404351	eukaryotic translation initiation factor 2B; subunit 1 (alpha; 26kD); go_function: protein binding; go_function: translation initiation factor activity; go_function: guanyl-nucleotide exchange factor activity; go_process: protein biosynthesis; go_process: cellular biosynthesis	eukaryotic translation initiation factor 2B; subunit 1 alpha; 26kDa	113	TRUE	12:122683911-122684959
cg00892393	16	1851526	NCBI:RefSeq	36.1	AAATATAACTATCACATTTGTATGCTTCAAATAACATTCTGAATGCCTCG	1850456	-	GeneID:254528	MGC35212	gs129;	NM_152764.1	GI:22749494	synonym: gs129	hypothetical protein LOC254528	1070	FALSE
cg00895324	21	40160387	NCBI:RefSeq	36.1	CCGGGACTGGCAGAGTAACAGATGTGAATGTGCCTTCAGTCTGCACAACG	40161217	+	GeneID:5121	PCP4	PEP-19;	NM_006198.2	GI:48762917	brain specific polypeptide PEP19; go_process: central nervous system development	Purkinje cell protein 4	830	FALSE
cg00897329	6	108722981	NCBI:RefSeq	36.1	CGGCCTCCTGGTCGCTCTTGGTTACCCTGCGCCCCTTAGCACAGAGCCCG	108722791	+	GeneID:246269	LACE1		NM_145315.3	GI:62241031	CG8520 gene product	lactation elevated 1	190	TRUE	6:108722472-108723166
cg00899641	2	198007831	NCBI:RefSeq	36.1	CGGGCTCAGCTCCTACGAAAGAAACCATAGAAAAAGGCAGAATCCTAGGA	198008016	-	GeneID:23451	SF3B1	PRP10; PRPF10; SAP155; SF3b155;	NM_012433.2	GI:54112116	isoform 1 is encoded by transcript variant 1; pre-mRNA splicing factor SF3b; 155 kDa subunit; spliceosome associated protein 155; pre-mRNA processing 10; go_component: spliceosome complex; go_function: binding; go_function: RNA splicing factor activity; transesterification mechanism; go_process: nuclear mRNA splicing; via spliceosome	splicing factor 3b; subunit 1 isoform 1	185	TRUE	2:198007436-198008570
cg00901652	11	10729010	NCBI:RefSeq	36.1	GGCCAATCCTGTTTTCTTCCCAAGATTGTTAGGGATAATTCAGTCATTCG	10729379	+	GeneID:9646	SH2BP1	Ctr9; TSBP; p150; p150TSP; KIAA0155;	NM_014633.2	GI:41281407	TPR-containing; SH2-binding phosphoprotein; go_function: binding	SH2 domain binding protein 1	369	TRUE	11:10728510-10730106
cg00912191	5	171642522	NCBI:RefSeq	36.1	AGGCCGGTGTGCTGTCGGGGTGGGCTAATCACATTCCCATCTGTCTTACG	171643248	-	GeneID:92181	DC-UbP	MGC30022;	NM_152277.1	GI:22748634	go_process: protein modification	dendritic cell-derived ubiquitin-like protein	726	TRUE	5:171642475-171644347
cg00912942	1	10947071	NCBI:RefSeq	36.1	TGGTGGGGGCTGAGCTTCCAGAGCCAGACCCAAGCTCCGTGTTGGTGTCG	10946845	-	GeneID:148345	C1orf127	FLJ37118; FLJ37833;	NM_173507.1	GI:27735128	synonyms: FLJ37118; FLJ37833	hypothetical protein LOC148345	226	FALSE
cg00915206	2	171381445	NCBI:RefSeq	36.1	CGCCTCTGGAGCTTTATAGGGCGATTATAAATCCAGCTCACGGTTTTGCG	171381446	+	GeneID:2571	GAD1	GAD;	NM_013445.3	GI:58331244	isoform GAD25 is encoded by transcript variant GAD25; glutamate decarboxylase 1 (brain; 67kD); go_component: intracellular; go_component: vesicle membrane; go_component: intracellular; go_component: vesicle membrane; go_function: lyase activity; go_function: protein binding; go_function: protein binding; go_function: glutamate decarboxylase activity; go_function: glutamate decarboxylase activity;…	glutamate decarboxylase 1 isoform GAD25	1	TRUE	2:171379577-171383944
cg00917893	3	58394821	NCBI:RefSeq	36.1	TCAAATCAACTTTATTGACAGTAGGCGGTGACCGACAGGCGGGGTGCACG	58394594	-	GeneID:5162	PDHB	PHE1B; DKFZp564K0164;	NM_000925.1	GI:4505686	Pyruvate dehydrogenase; E1 beta polypeptide; go_component: mitochondrion; go_function: oxidoreductase activity; go_function: pyruvate dehydrogenase (acetyl-transferring) activity; go_process: glycolysis; go_process: glucose metabolism; go_process: tricarboxylic acid cycle	pyruvate dehydrogenase (lipoamide) beta	227	TRUE	3:58394103-58394937
cg00925717	16	23220649	NCBI:RefSeq	36.1	CGTTCCTGGGAAAAGTGGCTGCATATGTCCCCCTAAAGTCACCAACTTGC	23221141	+	GeneID:6338	SCNN1B	ENaCb; SCNEB; ENaCbeta;	NM_000336.1	GI:4506816	epithelial sodium channel beta-2 subunit; epithelial sodium channel beta-3 subunit; go_component: membrane; go_component: membrane fraction; go_component: integral to plasma membrane; go_function: sodium ion binding; go_function: protein binding; go_function: ion channel activity; go_function: amiloride-sensitive sodium channel activity; go_process: excretion; go_process: ion transport; go_proces…	sodium channel; nonvoltage-gated 1; beta	492	TRUE	16:23220598-23221543
cg00943245	5	140847570	NCBI:RefSeq	36.1	TCTTGATCACCAATTACTTTCATTTCTTACTCAGATATAGGCATGACCCG	140848992	+	GeneID:56097	PCDHGC5	MGC138286; MGC138288; PCDH-GAMMA-C5;	NM_018929.2	GI:14277683	isoform 1 precursor is encoded by transcript variant 1; go_component: membrane; go_component: integral to membrane; go_function: protein binding; go_function: calcium ion binding; go_process: cell adhesion; go_process: homophilic cell adhesion	protocadherin gamma subfamily C; 5 isoform 1 precursor	1422	FALSE
cg00945862	2	74423748	NCBI:RefSeq	36.1	CGAGGTTTTCCTGTAGTAGTGTTGCGATTTTGTTCTGCTGTGTCCCCCTA	74423170	-	GeneID:57835	SLC4A5	NBC4; MGC129662;	NM_021196.2	GI:15042958	sodium bicarbonate transporter 4; isoform a isoform a is encoded by transcript variant a; go_component: membrane; go_component: integral to membrane; go_component: integral to membrane; go_function: inorganic anion exchanger activity; go_function: sodium:bicarbonate symporter activity; go_process: anion transport; go_process: bicarbonate transport	sodium bicarbonate transporter 4 isoform a	578	FALSE
cg00948524	17	26321883	NCBI:RefSeq	36.1	CTTTAGCTGGATGTCCCTCCATTAAGATGCAGCACCGTTGGATGTCTTCG	26322082	+	GeneID:84282	RNF135	L13; MGC13061;	NM_032322.3	GI:37655166	isoform 1 is encoded by transcript variant 1; go_component: ubiquitin ligase complex; go_function: zinc ion binding; go_function: metal ion binding; go_function: ubiquitin-protein ligase activity; go_process: protein ubiquitination	ring finger protein 135 isoform 1	199	TRUE	17:26321421-26323571
cg00949442	16	2331829	NCBI:RefSeq	36.1	GAGGTGGGTCGGGGTGTCCCTGGGCCGGACCGGGTCGTGGGACTGGGTCG	2330595	-	GeneID:21	ABCA3	ABC3; ABC-C; LBM180; MGC72201; EST111653;	NM_001089.1	GI:4501848	ABC transporter 3; ATP-binding cassette 3; go_component: lamellar body; go_component: plasma membrane; go_component: membrane fraction; go_component: integral to membrane; go_function: ATP binding; go_function: ATP binding; go_function: ATPase activity; go_function: nucleotide binding; go_function: transporter activity; go_function: ATPase activity; coupled to transmembrane movement of substances…	ATP-binding cassette; sub-family A member 3	1234	TRUE	16:2329513-2332346
cg00951770	14	23811503	NCBI:RefSeq	36.1	GTTTTCTATTGTAGTGAATGGCACTATTTCCTCCTCACTTCTTAAACTCG	23810643	-	GeneID:5875	RABGGTA		NM_182836.1	GI:33469950	go_function: metal ion binding; go_function: transferase activity; go_function: protein prenyltransferase activity; go_function: Rab-protein geranylgeranyltransferase activity; go_process: visual perception; go_process: protein modification; go_process: protein modification; go_process: protein amino acid prenylation	Rab geranylgeranyltransferase; alpha subunit	860	FALSE
cg00954566	10	102096395	NCBI:RefSeq	36.1	CGTGGCAGGGAGACGTGGCAGCCACCCCAGGATCTGGAGCTTGGGGGACG	102096762	+	GeneID:6319	SCD	SCD1; FADS5; PRO0998;	NM_005063.4	GI:53759150	acyl-CoA desaturase; fatty acid desaturase; delta-9-desaturase; predicted protein of HQ0998; go_component: membrane; go_component: integral to membrane; go_component: endoplasmic reticulum; go_function: iron ion binding; go_function: oxidoreductase activity; go_function: stearoyl-CoA 9-desaturase activity; go_function: stearoyl-CoA 9-desaturase activity; go_function: oxidoreductase activity; acti…	stearoyl-CoA desaturase	367	TRUE	10:102096020-102097861
cg00958560	4	6040940	NCBI:RefSeq	36.1	AGCAATGGCCCCATGGTAGGTTGGGTCTGCATATCTGCTTACTCATCACG	6041067	-	GeneID:389197	FLJ46481		NM_207405.1	GI:46409441		hypothetical protein LOC389197	127	FALSE
cg00967316	7	113346030	NCBI:RefSeq	36.1	TTCTGTGTGGAAAATGTCCGTCCCTAAGTCAAAAGTGGTTGAAGCACTCG	113346300	-	GeneID:5506	PPP1R3A	PP1G; PPP1R3;	NM_002711.2	GI:34304342	serine /threonine specific protein phosphatase; type-1 protein phosphatase skeletal muscle glycogen targeting subunit; protein phosphatase type-1 glycogen targeting subunit; protein phosphatase 1 glycogen- associated regulatory subunit; go_component: integral to membrane; go_function: hydrolase activity; go_function: phosphoprotein phosphatase activity; go_function: type 1 serine/threonine specif…	protein phosphatase 1 glycogen-binding regulatory subunit 3	270	FALSE
cg00969271	9	116132873	NCBI:RefSeq	36.1	TGATGGGCGATTGGCCACTTCTCCTCGATAACATTACTGTTTTTCTTCCG	116131890	+	GeneID:5005	ORM2	AGP2; AGP-B; AGP-B;	NM_000608.2	GI:40807473	alpha-1-acid glycoprotein; type 2; go_component: extracellular space; go_function: binding; go_process: acute-phase response	orosomucoid 2	983	FALSE
cg00971396	3	185564094	NCBI:RefSeq	36.1	AGGGGCAGGCCACAAGAGCTGGGTGGACACGGGGCCCAGGGGCATGTCCG	185563888	+	GeneID:5437	POLR2H	RPB8; RPB17; RPABC3; hsRPB8;	NM_006232.2	GI:14589952	go_component: nucleus; go_function: zinc ion binding; go_function: protein binding; go_function: nucleic acid binding; go_function: transferase activity; go_function: DNA-directed RNA polymerase activity; go_process: transcription	RNA polymerase II; polypeptide H	206	TRUE	3:185563205-185564171
cg00974864	1	159867677	NCBI:RefSeq	36.1	CCAGTTTCCTTTTCTTGAAACTTCATCTGATTTCTCAATCTGAAGTCTCG	159867525	-	GeneID:2215	FCGR3B	CD16; FCG3; CD16b; FCGR3;	NM_000570.2	GI:50355969	Fc-gamma receptor; Fc-gamma receptor IIIB; Fc-gamma receptor IIIb (CD 16); Fc fragment of IgG; low affinity IIIb; receptor for (CD16); go_component: membrane; go_function: IgG binding; go_function: receptor activity; go_process: immune response	low affinity immunoglobulin gamma Fc region receptor III-B precursor	152	FALSE
cg00986320	5	156628129	NCBI:RefSeq	36.1	CGCTCCTGGAAAACAGTACGGGTCCCAGTCCCTACGTTTAAAGATTGGAC	156628930	+	GeneID:26999	CYFIP2	PIR121; PRO1331;	NM_014376.1	GI:24307954	synonyms: PIR121; PRO1331	p53 inducible protein	801	TRUE	5:156628075-156628275
cg00988256	19	11267173	NCBI:RefSeq	36.1	AGCTAGATTTCTGCATCACAGAGCCTCTGGATCCATTCATTCATTCTCCG	11267824	+	GeneID:26526	TSPAN16	TM-8; TM4-B; TM4SF16;	NM_012466.2	GI:21265098	tetraspanin TM4-B; go_component: integral to membrane; go_component: integral to membrane	transmembrane 4 superfamily member 16	651	FALSE
cg00995152	9	123536136	NCBI:RefSeq	36.1	ACCAGGAGTGACTGGATCAGGGCAGCTTCTGAAATTCCCCCAGCTACACG		+	GeneID:153090	DAB2IP	AIP1; AF9Q34; DIP1/2; KIAA1743;	NT_008470.18	DAB2 interacting protein isoform 2	isoform 2 is encoded by transcript variant 2; nGAP-like protein; DOC-2/DAB2 interactive protein; ASK-interacting protein; go_function: GTPase activator activity			TRUE	9:123536075-123536593
cg00997424	10	99390171	NCBI:RefSeq	36.1	CGCTTAGCTTCCAATTGGCTTACTGGACTTGGGCGCTTTCAAAACAGCAA	99390433	+	GeneID:55361	PI4KII	DKFZP761G1923; RP11-548K23.6;	NM_018425.2	GI:19923532	phosphatidylinositol 4-kinase type II (PI4KII); go_component: lipid raft; go_component: integral to plasma membrane; go_function: kinase activity; go_function: protein binding; go_function: magnesium ion binding; go_function: 1-phosphatidylinositol 4-kinase activity; go_function: phosphotransferase activity; alcohol group as acceptor; go_process: phosphatidylinositol biosynthesis	phosphatidylinositol 4-kinase type II	262	TRUE	10:99390079-99391466
cg01007201	12	8166472	NCBI:RefSeq	36.1	CGACATCCAGGAGATTGATCAAATAAGGAATAAGTGAAAGACAATGAAAG	8167495	+	GeneID:50856	CLEC4A	DCIR; LLIR; DDB27; CLECSF6; HDCGC13P;	NM_016184.2	GI:37577113	isoform 1 is encoded by transcript variant 1; dendritic cell immunoreceptor; lectin-like immunoreceptor; C-type (calcium dependent; carbohydrate-recognition domain) lectin; superfamily member 6; go_component: integral to plasma membrane; go_function: sugar binding; go_function: transmembrane receptor activity; go_process: immune response; go_process: cell adhesion; go_process: cell surface recept…	C-type lectin; superfamily member 6 isoform 1	1023	FALSE
cg01017147	1	170076728	NCBI:RefSeq	36.1	AAGGCCCTGAGTGGTCTGACCTTACTTAATTCTTCATCTGTAATGACTCG	170077261	+	GeneID:26052	DNM3	Dyna III; KIAA0820; MGC70433;	NM_015569.2	GI:42544242	dynamin family member; go_component: ribosome; go_component: microtubule; go_component: intracellular; go_function: GTP binding; go_function: motor activity; go_function: GTPase activity; go_function: hydrolase activity; go_function: nucleotide binding; go_function: structural constituent of ribosome; go_process: endocytosis; go_process: protein biosynthesis	dynamin 3	533	TRUE	1:170076556-170078344
cg01031251	1	26728010	NCBI:RefSeq	36.1	CTGAAAGGACCCCCTTCAAGTGATAGGGCAGAGCACAGATTGCAAAAACG	26728836	+	GeneID:6195	RPS6KA1	RSK; HU-1; RSK1; MAPKAPK1A; S6K-alpha 1;	NM_001006665.1	GI:55743133	isoform b is encoded by transcript variant 2; ribosomal protein S6 kinase; 90kD; polypeptide 1; ribosomal protein S6 kinase; 90kD; 1; ribosomal protein S6 kinase alpha 1; p90-RSK 1; dJ590P13.1 (ribosomal protein S6 kinase; 90kD; polypeptide 1); go_function: ATP binding; go_function: nucleotide binding; go_function: transferase activity; go_function: protein kinase activity; go_function: protein-t…	ribosomal protein S6 kinase; 90kDa; polypeptide 1 isoform b	826	TRUE	1:26727978-26728184
cg01033160	19	38557113	NCBI:RefSeq	36.1	CGGTGATCGAAAATCTGTTCAGAAGTTCAAAGACTGATCAATAAAATAGG	38556449	+	GeneID:1054	CEBPG	GPE1BP; IG/EBP-1;	NM_001806.2	GI:34452718	go_component: nucleus; go_function: transcription factor binding; go_function: sequence-specific DNA binding; go_function: protein heterodimerization activity; go_process: transcription; go_process: immune response; go_process: liver development; go_process: chromatin remodeling; go_process: B cell differentiation; go_process: nucleosome disassembly; go_process: enucleate erythrocyte differentiat…	CCAAT/enhancer binding protein gamma	664	TRUE	19:38554952-38557513
cg01035422	15	88023559	NCBI:RefSeq	36.1	CGGCTGACCGCCACCTCAGTCTCACAGAGCCCAGGCTGCAGAGTGTCTCC	88023595	-	GeneID:5346	PLIN	PERI;	NM_002666.3	GI:54112124	lipid droplet-associated protein; go_component: lipid particle; go_function: lipid binding; go_process: lipid metabolism	perilipin	36	FALSE
cg01036012	10	85127	NCBI:RefSeq	36.1	CGCCGATCTGATTCCCGCACTGCCCGATCTGCGTGAGCACGATCTCCCTC	85178	-	GeneID:347688	TUBB8	FLJ40100; RP11-631M21.2;	NM_177987.1	GI:42558278	HSA10p15 beta-tubulin 4Q; go_component: microtubule; go_component: protein complex; go_function: GTP binding; go_function: GTPase activity; go_function: nucleotide binding; go_function: structural molecule activity; go_process: protein polymerization; go_process: microtubule-based movement	tubulin; beta 8	51	TRUE	10:84480-85489
cg01037108	5	137939119	NCBI:RefSeq	36.1	GAGGGCAGGCTTTCTCCAACCATCATGCTGCGGAGCATATTACCTGTACG	137939014	-	GeneID:3313	HSPA9B	CSA; MOT; MOT2; GRP75; HSPA9; PBP74; mot-2; MGC4500; MTHSP75;	NM_004134.4	GI:39812281	heat shock 70kD protein 9B (mortalin-2); stress-70 protein; mitochondrial; 75 kDa glucose regulated protein; peptide-binding protein 74; mortalin; perinuclear; p66-mortalin; go_component: cell surface; go_component: mitochondrion; go_function: ATP binding; go_function: nucleotide binding; go_function: unfolded protein binding; go_process: protein folding; go_process: anti-apoptosis	heat shock 70kDa protein 9B precursor	105	TRUE	5:137938552-137940556
cg01041367	8	75050634	NCBI:RefSeq	36.1	TCAAATCGTATATTCTTTCTTCTGTGCCAACAGGCTAGAATCATTTTCCG	75050998	+	GeneID:54968	TMEM70	FLJ20533;	NM_017866.3	GI:34147497	synonym: FLJ20533	hypothetical protein LOC54968	364	TRUE	8:75050629-75051563
cg01055695	9	137592771	NCBI:RefSeq	36.1	CGGGCTCGATTGTAAGTTACAAAGTGATGCTTCCCTGTGGGAAAAAGTAC	137593425	+	GeneID:5047	PAEP	GD; GdA; GdF; GdS; PEP; PAEG; PP14;	NM_001018049.1	GI:65507500	glycodelin-A; glycodelin-S; glycodelin-F; progesterone-associated endometrial protein; go_function: binding; go_function: transporter activity; go_process: transport; go_process: development	glycodelin precursor	654	FALSE
cg01072821	8	10419575	NCBI:RefSeq	36.1	CGTGGCCCCAAGTCTCCTGATGGGCCCCTGTGCATTCAAGATGAAATGAC	10420491	+	GeneID:203074	UNQ9391		NM_198464.1	GI:38348247	go_function: peptidase activity; go_function: serine-type endopeptidase activity; go_process: proteolysis	hypothetical protein LOC203074	916	FALSE
cg01074640	9	21218142	NCBI:RefSeq	36.1	CGGCCATCAGTAAAGAAAAGGACAGGGCCATTGGGATGTTGCAAATGTTG	21218221	-	GeneID:3451	IFNA17	IFNA;	NM_021268.1	GI:10880984	interferon alpha-WA; go_component: extracellular space; go_function: interferon-alpha/beta receptor binding; go_process: defense response; go_process: cell-cell signaling; go_process: response to virus	interferon; alpha 17	79	FALSE
cg01078276	10	75340683	NCBI:RefSeq	36.1	CGGAGAATTTACAAGCCTCTCGATTCCTCAGTCCAGACGCTGTTGGGTCC	75340896	+	GeneID:5328	PLAU	ATF; UPA; URK; u-PA;	NM_002658.2	GI:53729348	plasminogen activator; urinary; urokinase-type plasminogen activator precursor; U-plasminogen activator; antagonist of uPA; urokinase-type plasminogen activator amino-terminal fragment; urokinase plasminogen activator; go_component: extracellular space; go_function: kinase activity; go_function: peptidase activity; go_function: plasminogen activator activity; go_function: serine-type endopeptidas…	urokinase plasminogen activator preproprotein	213	TRUE	10:75340574-75341453
cg01082679	12	47397066	NCBI:RefSeq	36.1	CGCTCAATCCGGTTCTCGCGGGAAGATACACGGTTTTTAAGAAAGAACTT	47397048	-	GeneID:904	CCNT1	CCNT; CYCT1;	NM_001240.2	GI:17978465	cyclin C-related protein; CDK9-associated C-type protein; subunit of positive elongation transcription factor b; go_component: nucleus; go_function: protein kinase binding; go_process: cell cycle; go_process: cell division; go_process: regulation of transcription; DNA-dependent; go_process: transcription from RNA polymerase II promoter; go_process: regulation of cyclin dependent protein kinase ac…	cyclin T1	18	TRUE	12:47396161-47397563
cg01086895	11	6633091	NCBI:RefSeq	36.1	AGCGTGCGCCGGGGGTGTGGGGTGCGACAGCGTTGTGTTCCAGTGCATCG	6633656	-	GeneID:8642	DCHS1	FIB1; CDH25; PCDH16; FLJ11790; KIAA1773;	NM_003737.2	GI:73623031	fibroblast cadherin FIB1; protocadherin 16; fibroblast cadherin 1; go_component: membrane; go_component: integral to membrane; go_function: protein binding; go_function: calcium ion binding; go_process: cell adhesion; go_process: homophilic cell adhesion; go_process: calcium-dependent cell-cell adhesion	dachsous 1 precursor	565	TRUE	11:6632917-6634478
cg01091448	5	34043884	NCBI:RefSeq	36.1	GGCTGGGGCTAAGGGCTGCTCAGTTTCCTTCAGCGGGGCACTGGGAAGCG	34043963	-	GeneID:23600	AMACR	RACE;	NM_014324.4	GI:42794624	isoform 1 is encoded by transcript variant 1; go_component: peroxisome; go_component: mitochondrion; go_function: lyase activity; go_function: isomerase activity; go_function: alpha-methylacyl-CoA racemase activity; go_process: metabolism	alpha-methylacyl-CoA racemase isoform 1	79	TRUE	5:34043408-34044378
cg01092036	11	102100510	NCBI:RefSeq	36.1	ACAGCAGTATTTTCCCAGCCTTTAAAGAATTCAGCTTGTTTTCATGTCCG	102100868	-	GeneID:4317	MMP8	HNC; CLG1; PMNL-CL;	NM_002424.1	GI:4505220	PMNL collagenase; matrix metalloproteinase 8 (neutrophil collagenase); neutrophil collagenase; go_component: extracellular space; go_component: extracellular matrix (sensu Metazoa); go_function: calcium ion binding; go_function: zinc ion binding; go_function: metalloendopeptidase activity; go_function: neutrophil collagenase activity; go_process: proteolysis; go_process: collagen catabolism; go_p…	matrix metalloproteinase 8 preproprotein	358	FALSE
cg01095482	1	43538383	NCBI:RefSeq	36.1	CGGCTGACAACAACCTGGGAGCAGTCGCACTGCTTTGGCAAAGTCTCTAA	43539251	+	GeneID:7075	TIE1	TIE; JTK14;	NM_005424.2	GI:31543809	Tyrosine kinase with immunoglobulin and epidermal growth factor; tyrosine kinase with immunoglobulin and epidermal growth factor homology domains; tyrosine kinase with immunoglobulin and epidermal growth factor homology domains 1; receptor tyrosine kinase; go_component: integral to plasma membrane; go_function: ATP binding; go_function: receptor activity; go_function: nucleotide binding; go_funct…	tyrosine kinase with immunoglobulin-like and EGF-like domains 1	868	FALSE
cg01097940	12	6852581	NCBI:RefSeq	36.1	CGCCAGAGACTCTCGCGAGTTCGCCCCATTTGGGCCTCAGCATGGACCAT	6852713	-	GeneID:84727	SPSB2	SSB2; GRCC9; SSB-2; MGC2519;	NM_032641.1	GI:14249177	go_component: cellular component unknown; go_function: molecular function unknown; go_process: intracellular signaling cascade	SPRY domain-containing SOCS box protein SSB-2	132	TRUE	12:6852447-6853283
cg01107741	17	74517675	NCBI:RefSeq	36.1	CGGCCCTCATGTGCCAGTGCGGACCCTCGCGCCCCTCCAGCCTGCAGCCA	74517433	-	GeneID:124583	CANT1	SHAPY; SCAN-1;	NM_138793.2	GI:31543621	apyrase; Ca2+-dependent endoplasmic reticulum nucleoside diphosphatase; soluble calcium-activated nucleotidase SCAN-1; go_component: membrane; go_component: Golgi stack; go_component: integral to membrane; go_component: endoplasmic reticulum; go_function: hydrolase activity; go_function: calcium ion binding; go_function: signal transducer activity; go_function: nucleoside-diphosphatase activity; …	calcium activated nucleotidase 1	242	TRUE	17:74517067-74517856
cg01114088	4	5072012	NCBI:RefSeq	36.1	TCCTGGCTCAGGGCCCGCATGCGGGAGTAGCAGGTCGGGGGAGTGGGCCG	5072098	-	GeneID:54360	CYTL1	C17;	NM_018659.2	GI:49472832	cytokine-like protein C17; go_component: soluble fraction; go_component: extracellular space; go_function: receptor binding; go_process: signal transduction	cytokine-like 1	86	TRUE	4:5071781-5072185
cg01119135	1	205272148	NCBI:RefSeq	36.1	AGATCGACACCGAGTTGGTAAAGCCACGGGAGAATTTCCTGTTACAGTCG	205272715	-	GeneID:79098	C1orf116	SARG; MGC2742; MGC4309; FLJ36507; DKFZp666H2010;	NM_023938.4	GI:56550121	synonyms: SARG; MGC2742; MGC4309; FLJ36507; DKFZp666H2010	specifically androgen-regulated protein	567	FALSE
cg01120761	12	7794437	NCBI:RefSeq	36.1	GATTCACGTCTCTCTTTGGTCATCCTCTAGCGGATTAGCCTGGATTTACG	7793336	-	GeneID:170482	CLEC4C	DLEC; HECL; BDCA2; CD303; CLECSF7; CLECSF11; PRO34150; MGC125791; MGC125792; MGC125793;	NM_130441.2	GI:45580689	isoform 1 is encoded by transcript variant 1; blood dendritic cell antigen 2 protein; dendritic cell lectin b; C-type (calcium dependent; carbohydrate-recognition domain) lectin; superfamily member 11; C-type (calcium dependent; carbohydrate-recognition domain) lectin; superfamily member 7; C-type lectin domain family 4; member C; isoform 1; go_component: membrane; go_component: integral to membr…	C-type lectin domain family 4; member C isoform 1	1101	FALSE
cg01125463	6	43054156	NCBI:RefSeq	36.1	CGGCTGTGAAGTGTTCGATGACTCTCTGGCCTGGGCCACCCACACCCATT	43054866	-	GeneID:5190	PEX6	PAF2; PAF-2; PXAAA1;	NM_000287.2	GI:21361243	Peroxisomal biogenesis factor 6 (peroxisomal AAA-type ATPase 1); peroxisome biogenesis factor 6; go_component: membrane; go_component: peroxisome; go_component: cytoplasm; go_component: integral to membrane; go_function: ATP binding; go_function: nucleotide binding; go_function: ATPase activity; coupled; go_function: nucleoside-triphosphatase activity; go_process: peroxisome organization and biog…	peroxisomal biogenesis factor 6	710	FALSE
cg01134491	1	11788376	NCBI:RefSeq	36.1	GGGTTGGCGGTCGCTGGAAGTGGTAGCCATTGGGAGTTACACTAATCCCG		-	GeneID:4524	MTHFR	9606;	NT_021937.18	5;10-methylenetetrahydrofolate reductase (NADPH)	Methylenetetrahydrofolate reductase; methylenetetrahydrofolate reductase intermediate form; go_function: protein binding; go_function: oxidoreductase activity; go_function: methylenetetrahydrofolate reductase (NADPH) activity; go_function: methylenetetrahydrofolate reductase (NADPH) activity; go_process: circulation; go_process: methionine metabolism; go_process: amino acid metabolism			TRUE	1:11787877-11789059
cg01136458	8	4840683	NCBI:RefSeq	36.1	AGGATGTCGAATCCTTTAAATGTCCTTCTATGGAAACCAGCCCTCACTCG	4839736	-	GeneID:64478	CSMD1	KIAA1890;	NM_033225.3	GI:41393594	go_component: membrane; go_component: integral to membrane	CUB and Sushi multiple domains 1	947	FALSE
cg01137065	17	78070299	NCBI:RefSeq	36.1	TCCTGGCTAGCGAGTCATGTCATTGTGTCAAAACTGTCCTGCAAAATACG	78070883	+	GeneID:3607	FOXK2	ILF; ILF1; ILF-1;	NM_181430.1	GI:31563333	isoform 2 is encoded by transcript variant 2; interleukin enhancer binding factor 1; cellular transcription factor ILF-1; go_component: nucleus; go_component: nucleus; go_function: transcription factor activity; go_function: RNA polymerase II transcription factor activity; go_process: transcription; go_process: regulation of transcription; DNA-dependent; go_process: regulation of transcription fr…	forkhead box K2 isoform 2	584	TRUE	17:78070105-78071937
cg01137708	4	103642400	NCBI:RefSeq	36.1	TTCCCAGCCAAGAGGACTGACAAGCACTTCTGCTTTCATTTCATGGAACG	103641518	+	GeneID:4790	NFKB1	KBF1; EBP-1; MGC54151; NFKB-p50; NFKB-p105; NF-kappa-B; DKFZp686C01211;	NM_003998.2	GI:34577121	nuclear factor kappa-B DNA binding subunit; nuclear factor NF-kappa-B p50 subunit; DNA binding factor KBF1; go_component: nucleus; go_function: protein binding; go_function: transcription factor activity; go_process: signal transduction; go_process: regulation of transcription; DNA-dependent	nuclear factor kappa-B; subunit 1	882	TRUE	4:103640972-103642752
cg01143454	20	2743601	NCBI:RefSeq	36.1	GGTCAGCATTCTGGGAGTGGGCACCCGGGGCATTGTGACCTGTTACCACG	2743657	+	GeneID:128653	C20orf141	MGC26144; dJ860F19.4;	NM_080739.2	GI:42794623	go_component: integral to membrane; go_function: cysteine-type endopeptidase activity; go_process: proteolysis	hypothetical protein LOC128653	56	FALSE
cg01144251	19	56205958	NCBI:RefSeq	36.1	CGACACAGTGAGAGAACATTCAAGGGGAGCCCAGACCCAGCTTCATAACC	56204702	-	GeneID:284366	KLK9	KLK8; KLKL3; KLK-L3;	NM_012315.1	GI:29366811	kallikrein-like protein 3; kallikrein 8; go_component: extracellular region; go_function: peptidase activity; go_function: serine-type endopeptidase activity; go_process: proteolysis	kallikrein 9	1256	FALSE
cg01144286	20	9443596	NCBI:RefSeq	36.1	CGGGCACTCTTTGCAGAGAACAGAGCCGGCAAAGTAAAGTCAATTAGCTT	9443271	+	GeneID:24141	C20orf103		NM_012261.2	GI:40804463	similar to S68401 (cattle) glucose induced gene; go_component: membrane; go_component: integral to membrane	chromosome 20 open reading frame 103 precursor	325	TRUE	20:9443099-9443680
cg01146980	5	34966001	NCBI:RefSeq	36.1	TTGTTGGACTGCAGTTTTCCCCCTACAGTGGCGATGCGGGGCCGGGGTCG	34965455	+	GeneID:134218	DNAJA5		NM_001012339.2	GI:68077165	isoform 2 is encoded by transcript variant 2; GS3 protein; go_component: nucleus; go_function: zinc ion binding; go_function: nucleic acid binding; go_function: unfolded protein binding; go_function: heat shock protein binding; go_process: protein folding	DnaJ homology subfamily A member 5 isoform 2	546	TRUE	5:34964965-34966310
cg01148741	2	96175180	NCBI:RefSeq	36.1	GGGAAGGTGTTACCCGGAGTCGGAGGGACTAGCACCCCTCCGTTTTTGCG	96174906	-	GeneID:1844	DUSP2	PAC1; PAC-1;	NM_004418.2	GI:12707563	serine/threonine specific protein phosphatase; Dual-specificity phosphatase 2; go_component: nucleus; go_function: hydrolase activity; go_function: MAP kinase phosphatase activity; go_function: protein tyrosine phosphatase activity; go_function: protein tyrosine/threonine phosphatase activity; go_process: inactivation of MAPK activity; go_process: protein amino acid dephosphorylation; go_process:…	dual specificity phosphatase 2	274	TRUE	2:96173982-96175216
cg01151686	17	30331735	NCBI:RefSeq	36.1	TGGGCTGCCCGCGGCCTGTAATGAGCAAGTTCCGAGGCCTACGGTGAGCG	30331651	+	GeneID:3980	LIG3		NM_013975.2	GI:73747828	isoform alpha precursor is encoded by transcript variant alpha; polydeoxyribonucleotide synthase [ATP]; go_component: nucleus; go_function: ATP binding; go_function: DNA binding; go_function: ligase activity; go_function: metal ion binding; go_function: nucleotide binding; go_function: DNA ligase (ATP) activity; go_process: cell cycle; go_process: cell division; go_process: DNA repair; go_process…	ligase III; DNA; ATP-dependent isoform alpha precursor	84	TRUE	17:30331330-30332433
cg01160766	17	69711466	NCBI:RefSeq	36.1	CGTCCTTTTCCCCGGTTGCTGCTTGCTGTGAGTGTCTCTAGGGTGATACG	69711412	+	GeneID:6169	RPL38		NM_000999.2	GI:16306562	60S ribosomal protein L38; go_component: ribosome; go_function: structural constituent of ribosome; go_process: protein biosynthesis	ribosomal protein L38	54	TRUE	17:69710949-69712234
cg01171858	16	31401848	NCBI:RefSeq	36.1	AGCCTTCAGCCTTGATATGACCTGATTCAGCTAAACAAAGCTGGGGAGCG	31401940	+	GeneID:6524	SLC5A2	SGLT2;	NM_003041.1	GI:4507032	solute carrier family 5 (sodium/glucose transporter); member 2; sodium/glucose cotransporter; go_component: membrane; go_component: integral to membrane; go_function: sodium ion binding; go_function: symporter activity; go_function: transporter activity; go_function: sugar porter activity; go_function: low-affinity glucose:sodium symporter activity; go_process: ion transport; go_process: sodium i…	solute carrier family 5 (sodium/glucose cotransporter); member 2	92	FALSE
cg01172899	2	230641995	NCBI:RefSeq	36.1	GCTACTGCTAGTCTCACTTGCATCCTGGATTAGATTTCAGGACCTTTCCG	230641863	-	GeneID:151473	SLC16A14	FLJ30794;	NM_152527.3	GI:42415495	go_component: integral to membrane; go_function: transporter activity; go_process: transport	solute carrier family 16 (monocarboxylic acid transporters); member 14	132	FALSE
cg01173186	6	24234200	NCBI:RefSeq	36.1	CGGCAGGGCCCAGTGACCAGCCTTCCATGGCCCTGACAGCTGCCCTAACA	24234329	+	GeneID:140767	VMP	p24;	NM_080723.2	GI:31543933	vesicular membrain protein p24	vesicular membrane protein p24	129	TRUE	6:24234185-24234658
cg01182585	7	23305260	NCBI:RefSeq	36.1	AGTGTTGCTTGCCCACCTTGCTTTGCTTTGTGTCGCAGTAGCGCATTACG	23305465	+	GeneID:115416	C7orf30		NM_138446.1	GI:19923976	go_function: molecular function unknown	hypothetical protein LOC115416	205	TRUE	7:23305201-23305941
cg01183669	1	112963814	NCBI:RefSeq	36.1	AAAGATATTAGACTTCAAATCACCTAAGGCAAACCCTACTTCCTGGGGCG	112963928	-	GeneID:54879	ST7L	ST7R; STLR; FLJ11657; FLJ20284;	NM_198327.1	GI:38201629	isoform 5 is encoded by transcript variant 5; tumor suppressor ST7 like; go_function: binding	suppression of tumorigenicity 7-like isoform 5	114	TRUE	1:112963033-112964402
cg01184522	1	245562441	NCBI:RefSeq	36.1	CGAGCCCCGTGACCCCCACTCAGGGTCAGGACTCACCGCAGCCCCTCTGC	245561668	-	GeneID:84838	ZNF496	NIZP1; MGC15548;	NM_032752.1	GI:14249385	go_component: nucleus; go_function: zinc ion binding; go_function: metal ion binding; go_function: protein binding; go_function: nucleic acid binding; go_function: transcription factor activity; go_process: transcription; go_process: regulation of transcription; DNA-dependent	zinc finger protein 496	773	TRUE	1:245560686-245562977
cg01186777	19	6482016	NCBI:RefSeq	36.1	CGGGCGGAGGGGCGTGGCCTCCTTTTGTAGCCAAGCAGCTATAAAAAGCG	6482037	+	GeneID:8744	TNFSF9	4-1BB-L;	NM_003811.2	GI:24119163	receptor 4-1BB ligand; homolog of mouse 4-1BB-L; go_component: membrane; go_component: extracellular space; go_component: integral to plasma membrane; go_function: tumor necrosis factor receptor binding; go_process: apoptosis; go_process: immune response; go_process: cell proliferation; go_process: cell-cell signaling; go_process: signal transduction	tumor necrosis factor (ligand) superfamily; member 9	21	TRUE	19:6481661-6482655
cg01192952	19	44886982	NCBI:RefSeq	36.1	CGGAATTGTGTCCAGTCTTCTGTGTGAATCTCTGAGTGGGATCATTTAAA	44886786	+	GeneID:56891	LGALS14	CLC2; PPL13; MGC22235;	NM_020129.2	GI:45439323	isoform 1 is encoded by transcript variant 1; placental protein 13-like protein; Charcot-Leyden crystal protein 2; go_component: nucleus; go_function: sugar binding	lectin; galactoside-binding; soluble; 14 isoform 1	196	FALSE
cg01195053	16	2593275	NCBI:RefSeq	36.1	CGCTAGCGGGCAATGGCAGACACCCGCCCCCAACCGCGCCCCCACTCCGT	2593352	+	GeneID:124216	LOC124216		XR_001518.1	GI:89039499	Derived by automated computational analysis using gene prediction method: BestRefseq.		77	TRUE	16:2593086-2593971
cg01197831	9	96395762	NCBI:RefSeq	36.1	AGCATTGAGTTCAGCAGCTGGGTGAGCTCCCCAGTCCCTTTGGCCTGACG	96395896	-	GeneID:8789	FBP2		NM_003837.2	GI:22907027	muscle fructose-bisphosphatase; fructose-1;6-bisphosphatase isozyme 2; D-fructose-1;6-bisphosphate 1-phosphohydrolase; FBPase; hexosediphosphatase; go_function: hydrolase activity; go_function: fructose-bisphosphatase activity; go_function: phosphoric ester hydrolase activity; go_function: fructose-2;6-bisphosphate 2-phosphatase activity; go_process: gluconeogenesis; go_process: carbohydrate meta…	fructose-1;6-bisphosphatase 2	134	TRUE	9:96395689-96395929
cg01199721	12	119117147	NCBI:RefSeq	36.1	GGGCTGGAAGTGGGTCAGGGGCTGCAAGGCGGGCCCATAGCGTTACACCG	119116896	-	GeneID:10985	GCN1L1	GCN1; GCN1L; KIAA0219;	NM_006836.1	GI:54607052	GCN1 (general control of amino-acid synthesis; yeast; homolog)-like; GCN1 (general control of amino-acid synthesis 1; yeast)-like 1; go_function: binding	GCN1 general control of amino-acid synthesis 1-like 1	251	TRUE	12:119116445-119117345
cg01200060	20	605283	NCBI:RefSeq	36.1	CGGGCGCTGCAAGAGGAAGTGAAAATCGTCCAGTAATTAATTTTCCTGCT	604823	-	GeneID:85508	SCRT2		NM_033129.1	GI:46430490	scratch (drosophila homolog) 2; zinc finger protein; transcriptional repressor scratch 2; go_component: nucleus; go_function: DNA binding; go_function: zinc ion binding; go_function: metal ion binding; go_process: transcription; go_process: regulation of transcription; DNA-dependent	scratch 2 protein	460	TRUE	20:605211-605426
cg01204439	7	144164255	NCBI:RefSeq	36.1	CCAAGGCTTCGTTTTCTGGGCTGGTTCTGCTAGCTGTAGTACTGCTGCCG	144164066	-	GeneID:27010	TPK1	HTPK1;	NM_022445.2	GI:21362109	mouse thiamin pyrophosphokinase homolog; thiamine pyrophosphokinase; go_function: ATP binding; go_function: nucleotide binding; go_function: transferase activity; go_function: thiamin diphosphokinase activity; go_process: thiamin metabolism; go_process: thiamin diphosphate biosynthesis	thiamin pyrophosphokinase 1	189	TRUE	7:144163180-144164790
cg01214321	8	26491346	NCBI:RefSeq	36.1	CGCCACGGTGGCCGACTTGAACCGAGGCTTTTATTGCTGTAGTTTATTTC	26491338	+	GeneID:1808	DPYSL2	DRP2; CRMP2; DRP-2; DHPRP2;	NM_001386.4	GI:50811906	collapsin response mediator protein hCRMP-2; go_function: hydrolase activity; go_function: dihydropyrimidinase activity; go_process: signal transduction; go_process: nervous system development; go_process: nucleobase; nucleoside; nucleotide and nucleic acid metabolism	dihydropyrimidinase-like 2	8	TRUE	8:26490154-26491537
cg01226883	1	11788229	NCBI:RefSeq	36.1	CGCCCCCATCGGTGACTCAGTGACCTGGTGACTGGATTCTCGGCCACCTG		-	GeneID:4524	MTHFR	9606;	NT_021937.18	5;10-methylenetetrahydrofolate reductase (NADPH)	Methylenetetrahydrofolate reductase; methylenetetrahydrofolate reductase intermediate form; go_function: protein binding; go_function: oxidoreductase activity; go_function: methylenetetrahydrofolate reductase (NADPH) activity; go_function: methylenetetrahydrofolate reductase (NADPH) activity; go_process: circulation; go_process: methionine metabolism; go_process: amino acid metabolism			TRUE	1:11787877-11789059
cg01227741	7	149842112	NCBI:RefSeq	36.1	CGGTTGACCAGATATTCCAGTTGGCTACGTAAGAATACTATGTTTAGAGT	149842878	+	GeneID:168537	GIMAP7	IAN7; hIAN7; MGC27027;	NM_153236.3	GI:55774985	immune associated nucleotide; go_function: GTP binding; go_function: nucleotide binding	GTPase; IMAP family member 7	766	TRUE	7:149841790-149842156
cg01234063	11	125731217	NCBI:RefSeq	36.1	CTCCGTTCCCTTGGAGTGAGCAAGCGGGACAGTTCTGCGGAAAGTTTCCG	125731306	+	GeneID:6484	ST3GAL4	STZ; SAT3; CGS23; SIAT4; NANTA3; SIAT4C; FLJ11867; ST3GalIV; ST3Gal IV;	NM_006278.1	GI:5454057	sialyltransferase 4C (beta-galactosidase alpha-2;3-sialytransferase); sialyltransferase 4C (beta-galactoside alpha-2;3-sialytransferase); alpha-3-N-acetylneuraminyltransferase; sialyltransferase 4C (beta-galactoside alpha-2;3-sialyltransferase); go_component: membrane; go_component: Golgi stack; go_component: integral to membrane; go_function: transferase activity; transferring glycosyl groups; g…	ST3 beta-galactoside alpha-2;3-sialyltransferase 4	89	TRUE	11:125730423-125731406
cg01242619	8	145121460	NCBI:RefSeq	36.1	CTGAGGTCCGGGCAGTCTCTGAAGATGTCTCCAATGGAAGCAGTGGCTCG	145121531	-	GeneID:5339	PLEC1	HD1; PCN; EBS1; EBSO; PLTN; PLEC1b;	NM_201379.1	GI:41322907	isoform 3 is encoded by transcript variant 3; plectin 1; intermediate filament binding protein; 500kD; hemidesmosomal protein 1; epidermolysis bullosa simplex 1 (Ogna); go_component: cytoskeleton; go_component: plasma membrane; go_component: intermediate filament; go_function: actin binding; go_function: structural constituent of muscle; go_function: structural constituent of cytoskeleton; go_pro…	plectin 1 isoform 3	71	TRUE	8:145120975-145121542
cg01244871	8	87589960	NCBI:RefSeq	36.1	CGCCATGACCTGCAACTTGCGGGCTGACCCTGCACTACTTCAGGCAGCTA	87590037	-	GeneID:51115	FAM82B	CGI-90; FLJ20665;	NM_016033.1	GI:7705802	go_function: binding	hypothetical protein LOC51115	77	TRUE	8:87589421-87590364
cg01248426	8	87180271	NCBI:RefSeq	36.1	CGGCCCCTGAAGATTTGCACTAGCCTGGGAAAAGTGCGAGTAATTATCAG	87180255	+	GeneID:245972	ATP6V0D2	VMA6; ATP6D2; FLJ38708;	NM_152565.1	GI:22749164	ATPase; H+ transporting; lysosomal 38kD; V0 subunit d isoform 2; go_component: proton-transporting two-sector ATPase complex; go_function: hydrogen-transporting ATPase activity; rotational mechanism; go_function: hydrogen-transporting ATP synthase activity; rotational mechanism; go_process: ATP synthesis coupled proton transport	ATPase; H+ transporting; lysosomal 38kDa; V0 subunit d isoform 2	16	FALSE
cg01249910	17	7471969	NCBI:RefSeq	36.1	TCGCAGCAGGGGGCACAACTGTCAGCCAATCAGCTTGGAGAACAGGCACG	7471889	-	GeneID:112483	SAT2	SSAT2;	NM_133491.2	GI:34147485	go_function: transferase activity; go_function: acyltransferase activity; go_function: N-acetyltransferase activity; go_function: diamine N-acetyltransferase activity	polyamine N-acetyltransferase	80	TRUE	17:7471274-7472044
cg01255591	20	42399124	NCBI:RefSeq	36.1	GCCAAGTTCCCAGGAGGCAGCATCCTCTGGGTCGGCACTGTTGGAGAACG	42399040	+	GeneID:140902	R3HDML	MGC129564; dJ881L22.3;	NM_178491.2	GI:60279649	go_component: extracellular region	R3H domain (binds single-stranded nucleic acids) containing-like	84	FALSE
cg01272601	2	69725189	NCBI:RefSeq	36.1	GTCAGCTCTGAGCTAGGCGCTGTGAGAACGCTCAGTAAGACAGTGTCTCG	69724353	-	GeneID:22848	AAK1	KIAA1048;	NM_014911.2	GI:29570779	adaptor-associated kinase 1; go_function: ATP binding; go_function: nucleotide binding; go_function: transferase activity; go_function: protein-tyrosine kinase activity; go_function: protein serine/threonine kinase activity; go_process: protein amino acid phosphorylation	AP2 associated kinase 1	836	TRUE	2:69723355-69725389
cg01274660	7	100303561	NCBI:RefSeq	36.1	GGTGGGGTCCCATGGAGTACTCCAGCACACGCAGGTGAGACCCGGGATCG	100302981	+	GeneID:7205	TRIP6	OIP1; ZRP-1; MGC3837; MGC4423; MGC10556; MGC10558; MGC29959;	NM_003302.1	GI:23308730	OPA-interacting protein 1; zyxin related protein 1; go_component: cellular component unknown; go_function: zinc ion binding; go_function: metal ion binding; go_function: protein binding; go_function: thyroid hormone receptor binding; go_process: biological process unknown	thyroid hormone receptor interactor 6	580	FALSE
cg01277844	1	153201358	NCBI:RefSeq	36.1	ATTTCTTCTACCTCTGCCTCTTAACCCTTCTGGGAAGCCTATTGTGTACG	153200882	-	GeneID:90780	PYGO2	FLJ33226; 1190004M21Rik;	NM_138300.3	GI:56676333	pygopus 2; go_component: nucleus; go_function: protein binding; go_function: zinc ion binding; go_function: metal ion binding; go_process: Wnt receptor signaling pathway; go_process: regulation of transcription; DNA-dependent	pygopus homolog 2	476	TRUE	1:153200467-153201542
cg01281797	1	149404873	NCBI:RefSeq	36.1	ATTGCAAGAATTTGTAGTACACCTTCCACTCAGAGATCCTCAAAGGTCCG	149404960	-	GeneID:388695	LYSMD1	SB145; MGC35223; RP11-68I18.5;	NM_212551.2	GI:51036605	go_process: cell wall catabolism	LysM; putative peptidoglycan-binding; domain containing 1	87	TRUE	1:149404707-149405926
cg01281904	8	54327310	NCBI:RefSeq	36.1	CGGGTATTACCTGAATTGCTGATAGTATCTGAGAAGGGCAAAACACTCTC	54326747	-	GeneID:4986	OPRK1	KOR; OPRK;	NM_000912.3	GI:75991710	Opiate receptor; kappa-1; go_component: membrane; go_component: integral to membrane; go_component: integral to plasma membrane; go_function: receptor activity; go_function: kappa-opioid receptor activity; go_function: rhodopsin-like receptor activity; go_function: kappa-opioid receptor activity; go_process: behavior; go_process: immune response; go_process: signal transduction; go_process: senso…	opioid receptor; kappa 1	563	TRUE	8:54327302-54327509
cg01282432	14	56116610	NCBI:RefSeq	36.1	ATGGAGGCCCAGAGCTGACCAGACCGAATGCCAAGAGCAGGGGCCAGACG	56116296	+	GeneID:54916	C14orf101	FLJ20392;	NM_017799.2	GI:39932586	go_component: membrane; go_component: integral to membrane	hypothetical protein LOC54916	314	TRUE	14:56115835-56116669
cg01288089	4	77163809	NCBI:RefSeq	36.1	CGAGTCTGCAACATGGGACTTCCCCAGGAACAGCCAGCAGGTTTTGCTAA	77163674	-	GeneID:3627	CXCL10	C7; IFI10; INP10; IP-10; crg-2; mob-1; SCYB10; gIP-10;	NM_001565.1	GI:4504700	small inducible cytokine subfamily B (Cys-X-Cys); member 10; protein 10 from interferon (gamma)-induced cell line; interferon-inducible cytokine IP-10; gamma IP10; go_component: soluble fraction; go_component: extracellular space; go_function: chemokine activity; go_function: cAMP-dependent protein kinase regulator activity; go_process: cell motility; go_process: chemotaxis; go_process: circulati…	small inducible cytokine B10 precursor	135	FALSE
cg01292265	20	2581870	NCBI:RefSeq	36.1	ATCAGCATATTTTAAGAGCTTCCAAGGCTGAGAACCGCTGCTTGACTGCG	2581254	+	GeneID:10528	NOL5A	NOP56;	NM_006392.2	GI:32483373	nucleolar protein 5A (56kD with KKE/D repeat); go_component: nucleolus; go_function: RNA binding; go_process: rRNA processing	nucleolar protein 5A	616	TRUE	20:2580376-2582171
cg01293143	20	62158770	NCBI:RefSeq	36.1	CCACAGAGAATTCCTAAAGGCCTATCCATATGTCCCTGTCCATAAAGACG	62158883	+	GeneID:6919	TCEA2	TFIIS;	NM_003195.4	GI:38505154	isoform a is encoded by transcript variant 1; transcription elongation factor TFIIS.1; go_component: nucleus; go_component: transcription elongation factor complex; go_function: zinc ion binding; go_function: metal ion binding; go_function: protein binding; go_function: protein binding; go_function: transcription factor activity; go_function: transcriptional elongation regulator activity; go_proc…	transcription elongation factor A protein 2 isoform a	113	FALSE
cg01294695	15	88095644	NCBI:RefSeq	36.1	CGCCTGTTTCGCCCCACCTGGGCCCTCGCTTGGGCGCCCGACCCAGCCTC	88095552	-	GeneID:55897	MESP1	MGC10676; IR1899308;	NM_018670.1	GI:14149723	go_component: nucleus; go_function: transcription regulator activity; go_process: regulation of transcription	mesoderm posterior 1	92	TRUE	15:88094552-88095740
cg01294702	17	71648573	NCBI:RefSeq	36.1	ATGATCCCCTATCATAATATTCCTTTTCAAGGATCAGAGGACCTCCACCG	71648161	-	GeneID:2302	FOXJ1	HFH4; HFH-4; FKHL13; MGC35202;	NM_001454.2	GI:50301235	forkhead (Drosophila)-like 13	forkhead box J1	412	TRUE	17:71647419-71649480
cg01301664	5	52811562	NCBI:RefSeq	36.1	TGGGGGTGGCTGCAAAGTCAGGCACTCACAGACCCAGACACAAAACCTCG	52812352	+	GeneID:10468	FST	FS;	NM_013409.1	GI:7242221	isoform FST344 precursor is encoded by transcript variant FST344; go_component: extracellular region; go_function: protein binding; go_function: activin inhibitor activity; go_process: development; go_process: negative regulation of follicle-stimulating hormone secretion	follistatin isoform FST344 precursor	790	TRUE	5:52811100-52812543
cg01307730	6	25834576	NCBI:RefSeq	36.1	CGGCAGTGTTAGAGTATCTCACAGCAGAAATCCTTGAGCTGGCAGGCAAT	25834769	-	GeneID:221613	HIST1H2AA	H2AFR; bA317E16.2;	NM_170745.3	GI:52426769	H2A histone family; member R; go_component: nucleus; go_component: nucleosome; go_function: DNA binding; go_process: nucleosome assembly; go_process: chromosome organization and biogenesis (sensu Eukaryota)	histone H2A	193	TRUE	6:25834320-25834896
cg01311051	16	29972398	NCBI:RefSeq	36.1	CGGACTGGGGAGGGGGCTTCTACCCAACAGAGACTACAACCTGCCAGCTC	29971992	+	GeneID:226	ALDOA	ALDA; MGC10942; MGC17716; MGC17767;	NM_000034.2	GI:34577108	fructose-bisphosphate aldolase A; fructose-1;6-bisphosphate triosephosphate-lyase; go_function: lyase activity; go_function: fructose-bisphosphate aldolase activity; go_process: glycolysis; go_process: fructose metabolism; go_process: striated muscle contraction	aldolase A	406	FALSE
cg01316789	20	33716110	NCBI:RefSeq	36.1	GGCGGAGGCACTCGCGCGGGGGGTAATTCGGGGTCTGGGTTCTGGTGCCG	33716252	-	GeneID:10137	RBM12	SWAN; KIAA0765; HRIHFB2091;	NM_006047.4	GI:33469952	go_component: nucleus; go_function: RNA binding; go_function: nucleotide binding	RNA binding motif protein 12	142	TRUE	20:33715695-33717580
cg01321151	11	915523	NCBI:RefSeq	36.1	TCTGTCGTTGTTGGTGGTCACTGCAAAAGAGGCGGCCACGCAGGCACACG	915841	+	GeneID:161	AP2A2	HIP9; HYPJ; ADTAB; CLAPA2;	NM_012305.2	GI:71725392	alpha-adaptin C; Huntingtin interacting protein J; adaptin; alpha B; clathrin-associated/assembly/adaptor protein; large; alpha 2; go_component: coated pit; go_component: Golgi stack; go_component: AP-2 adaptor complex; go_component: clathrin coat of trans-Golgi network vesicle; go_function: binding; go_function: lipid binding; go_function: structural molecule activity; go_process: endocytosis; g…	adaptor-related protein complex 2; alpha 2 subunit	318	TRUE	11:915181-916508
cg01322079	6	166676581	NCBI:RefSeq	36.1	CGGTCTGAAATACAGCTCCTCGCTTTAATCCTGAGGCAGGTGTTTGTGTC	166675981	-	GeneID:113402	SFT2D1	pRGR1; C6orf83; MGC19825;	NM_145169.1	GI:21553316	synonyms: pRGR1; C6orf83; MGC19825	hypothetical protein LOC113402	600	TRUE	6:166675498-166676609
cg01331554	4	76817501	NCBI:RefSeq	36.1	GTCAGAAGAGTCGCTGAGGACCGGGTGCGGCGGGTTCTTATTGCTCGCCG	76817629	-	GeneID:9908	G3BP2		NM_012297.3	GI:45359844	isoform a is encoded by transcript variant 2; go_component: nucleus; go_component: cytoplasm; go_function: RNA binding; go_function: nucleotide binding; go_function: protein transporter activity; go_function: receptor signaling complex scaffold activity; go_process: transport; go_process: mRNA processing; go_process: mRNA-nucleus export; go_process: protein-nucleus import; go_process: Ras protein…	Ras-GTPase activating protein SH3 domain-binding protein 2 isoform a	128	TRUE	4:76816555-76818076
cg01334437	8	55177208	NCBI:RefSeq	36.1	TTCCCTAGCCAGCACTGAGCATGCGCAGGCTGCGTGGTGTGGCGAAAGCG	55177130	-	GeneID:10434	LYPLA1	LPL1; APT-1; LYSOPLA;	NM_006330.2	GI:20302148	lysophospholipase 1; lysophospholipid-specific lysophospholipase; acyl-protein thioesterase-1; go_component: membrane fraction; go_function: hydrolase activity; go_function: lysophospholipase activity; go_process: lipid metabolism; go_process: fatty acid metabolism	lysophospholipase I	78	TRUE	8:55176417-55177361
cg01335367	12	108656591	NCBI:RefSeq	36.1	CGGTGGAGCCAATTCACCAGCAGGTCCCGGCAGCAACTCTTCTACAACAG	108656955	+	GeneID:84915	C12orf34	FLJ14721;	NM_032829.1	GI:14249533	synonym: FLJ14721	hypothetical protein LOC84915	364	FALSE
cg01346152	1	12601348	NCBI:RefSeq	36.1	CCTAAGCATCGTGAGGCACTTGGGTCAGGCTTTTAAAAGTCCACTCTACG	12600407	-	GeneID:9249	DHRS3	SDR1; Rsdr1; retSDR1;	NM_004753.4	GI:62988332	short-chain dehydrogenase/reductase 1; go_component: integral to membrane; go_function: nucleotide binding; go_function: oxidoreductase activity; go_function: electron transporter activity; go_process: metabolism; go_process: visual perception; go_process: fatty acid metabolism	dehydrogenase/reductase (SDR family) member 3	941	TRUE	1:12599449-12601356
cg01348757	15	88024305	NCBI:RefSeq	36.1	GGCTGTCTGGGTGCTCTTGATTAGTGATAGAATCCTAGTCAACACTGTCG	88023595	-	GeneID:5346	PLIN	PERI;	NM_002666.3	GI:54112124	lipid droplet-associated protein; go_component: lipid particle; go_function: lipid binding; go_process: lipid metabolism	perilipin	710	FALSE
cg01350700	17	77589097	NCBI:RefSeq	36.1	CGTCGATTTCAAGCACGGAAGATGGGTCACACCAGGCACTTCAAAAGACC	77588862	-	GeneID:51181	DCXR	DCR; P34H; HCRII; KIDCR;	NM_016286.2	GI:41350203	carbonyl reductase; kidney dicarbonyl reductase; carbonyl reductase II; go_component: membrane; go_function: oxidoreductase activity; go_function: L-xylulose reductase activity; go_process: metabolism; go_process: glucose metabolism; go_process: D-xylose metabolism; go_process: carbohydrate metabolism	dicarbonyl/L-xylulose reductase	235	TRUE	17:77588174-77589816
cg01351032	16	10878692	NCBI:RefSeq	36.1	CCTTGGGGCTCTGACAGGTAGGACCCAGCAGGGCGTGGAGCCAGGCAACG	10878558	+	GeneID:4261	CIITA	C2TA; MHC2TA; CIITA IV;	NM_000246.2	GI:73747680	MHC class II transactivator; MHC class II transactivator type III; go_component: nucleus; go_function: ATP binding; go_function: DNA binding; go_function: nucleotide binding; go_function: ubiquitin binding; go_function: transcription regulator activity; go_function: transcription coactivator activity; go_function: RNA polymerase II transcription factor activity; go_process: immune response; go_pr…	class II transactivator	134	FALSE
cg01354473	7	27171328	NCBI:RefSeq	36.1	CAACGCTGTACCCGCTGCGGTGTACCACCACCATCACCACCACCCCTACG	27171674	-	GeneID:3205	HOXA9	HOX1; ABD-B; HOX1G; HOX1.7; MGC1934;	NM_152739.2	GI:24497557	isoform a is encoded by transcript variant 1; homeobox protein HOXA9; homeodomain protein HOXA9; go_component: nucleus; go_component: nucleus; go_function: transcription factor activity; go_function: transcriptional activator activity; go_process: transcription; go_process: development; go_process: regulation of transcription; DNA-dependent	homeobox protein A9 isoform a	346	TRUE	7:27170287-27173690
cg01357116	4	94968519	NCBI:RefSeq	36.1	CGCCCAGAAGCCACTCAAAGCAGAGAGAAGGCCGCCTACCCTGTGCTGCC	94969101	+	GeneID:474	ATOH1	ATH1; HATH1; MATH-1;	NM_005172.1	GI:4885074	go_component: nucleus; go_function: transcription factor activity; go_process: central nervous system development; go_process: regulation of transcription; DNA-dependent; go_process: transcription from RNA polymerase II promoter	atonal homolog 1	582	TRUE	4:94968356-94970368
cg01359534	1	152560275	NCBI:RefSeq	36.1	CGGGGCCTGAGTGAAGACCATGGTGGAAACACCCTATTGCTATTCACTGC	152560216	+	GeneID:89872	AQP10	AQPA_HUMAN;	NM_080429.2	GI:22538419	small intestine aquaporin; go_component: membrane; go_component: integral to membrane; go_function: transporter activity; go_process: transport	aquaporin 10	59	FALSE
cg01361777	10	79299108	NCBI:RefSeq	36.1	CGCGCTCAGCAGATCTGGACTTCGGTGTTTCTGCCAGGCCTCCCACCTCA	79298959	-	GeneID:9231	DLG5	PDLG; KIAA0583;	NM_004747.2	GI:28466996	placenta and prostate DLG; go_component: cytoplasm; go_component: plasma membrane; go_function: protein binding; go_function: receptor signaling complex scaffold activity; go_process: cell-cell adhesion; go_process: intracellular signaling cascade; go_process: negative regulation of cell proliferation; go_process: regulation of progression through cell cycle	discs large homolog 5	149	FALSE
cg01366407	1	153222615	NCBI:RefSeq	36.1	CCTTTAAATGTCTACCTTATCCTGGGCCTTGGCCCTTTTCAATGCATTCG	153222441	+	GeneID:80308	FLAD1	FAD1; PP591; MGC31803; MGC40255; RP11-307C12.7;	NM_025207.3	GI:41872388	isoform 1 is encoded by transcript variant 1; A930017E24Rik; FAD-synthetase; FAD-synthetase (PP591); go_function: transferase activity; go_process: metabolism; go_process: Mo-molybdopterin cofactor biosynthesis	FAD synthetase isoform 1	174	TRUE	1:153222049-153222617
cg01369413	11	5487120	NCBI:RefSeq	36.1	ATGGCACGGTGCTGCCTCTTGATGACCAGGTGGACAGTGAGGCCATCTCG	5487729	-	GeneID:50613	UBQLN3	TUP-1;	NM_017481.2	GI:16753208	go_process: ubiquitin cycle	ubiquilin 3	609	FALSE
cg01369850	19	56766400	NCBI:RefSeq	36.1	ATTTAGCTTCTGTTGTTAAGTGGATCTAAGCCTATGTCGCTTACTGGACG	56766343	+	GeneID:7728	ZNF175	OTK18;	NM_007147.2	GI:37594438	go_component: nucleus; go_function: zinc ion binding; go_function: metal ion binding; go_function: transcription factor activity; go_process: transcription; go_process: response to virus; go_process: regulation of transcription; DNA-dependent	zinc finger protein 175	57	TRUE	19:56766084-56766679
cg01374047	16	3014171	NCBI:RefSeq	36.1	GGCTTAAGGGGGCTGCGGTGGACACCACTTCTTAATGTCGGGGGTCTTCG	3014288	-	GeneID:54985	HCFC1R1	HPIP; FLJ20568; MGC70711; MGC99622;	NM_001002017.1	GI:50952465	isoform 2 is encoded by transcript variant 2; HCF-1 beta-propeller interacting protein; host cell factor C1 regulator 1 (XPO1 dependant)	host cell factor C1 regulator 1 (XPO1 dependant) isoform 2	117	TRUE	16:3013862-3014613
cg01385430	1	148305705	NCBI:RefSeq	36.1	TTCAGAGTCCCGCCGGAGTTAGAGCTGGCAGAGTCCAATTGCTCAGAGCG	148306487	+	GeneID:11311	VPS45A	H1; VPS45; VSP45; VPS45B; VPS54A; VSP45A; H1VPS45;	NM_007259.2	GI:18105062	leucocyte vacuolar protein sorting 45; vacuolar protein sorting 45B (yeast); vacuolar protein sorting 45A (yeast homolog); go_component: membrane; go_component: Golgi stack; go_component: lysosome; go_component: Golgi vesicle; go_process: inflammatory response; go_process: vesicle-mediated transport; go_process: vesicle docking during exocytosis; go_process: intracellular protein transport	vacuolar protein sorting 45A	782	TRUE	1:148305518-148306511
cg01399317	8	144882327	NCBI:RefSeq	36.1	TGGCTGGTCTGGAAGCGGAAGTCGTCGCCGTGGCTGAGGAACGTCTGCCG	144882798	-	GeneID:286077	FLJ46072		NM_198488.1	GI:38348289		hypothetical protein LOC286077	471	TRUE	8:144880068-144883005
cg01404615	4	108178021	NCBI:RefSeq	36.1	AGAAATGCAATAACTTTCGAACAATCCCTTGCTTTGCTTGGAAAGTCTCG	108176902	-	GeneID:27123	DKK2	DKK-2;	NM_014421.2	GI:54792134	dickkopf related protein-2; dickkopf 2; dickkopf (Xenopus laevis) homolog 2; go_component: extracellular region; go_component: extracellular space; go_process: development; go_process: Wnt receptor signaling pathway; go_process: negative regulation of Wnt receptor signaling pathway	dickkopf homolog 2 precursor	1119	TRUE	4:108177508-108178160
cg01408558	19	10424212	NCBI:RefSeq	36.1	ACACACTTATAGGTCCACAGCTGAGCATATAGCAAATGCCTTCAGACACG	10424637	+	GeneID:5141	PDE4A	PDE4; DPDE2;	NM_006202.1	GI:5453861	Phosphodiesterase-4A; cAMP-specific (dunce (Drosophila)-homolog; phosphodiesterase 4A; cAMP-specific (dunce (Drosophila)-homolog phosphodiesterase E2); phosphodiesterase isozyme 4; cyclic AMP-specific phosphodiesterase HSPDE4A10; go_component: soluble fraction; go_component: membrane fraction; go_component: insoluble fraction; go_function: catalytic activity; go_function: hydrolase activity; go_f…	phosphodiesterase 4A; cAMP-specific (phosphodiesterase E2 dunce homolog; Drosophila)	425	FALSE
cg01413516	19	17793328	NCBI:RefSeq	36.1	CAGCACCAGCGCCCAGGCGGGCAGACGGGGGTCCATGGTGGTGGGTGGCG	17793320	-	GeneID:3640	INSL3	RLF; RLNL; MGC119818; MGC119819;	NM_005543.2	GI:38327534	leydig insulin -like peptide; leydig insulin -like hormone; relaxin-like factor; insulin-like 3; go_component: soluble fraction; go_component: extracellular region; go_function: hormone activity; go_function: insulin receptor binding; go_process: spermatogenesis; go_process: physiological process; go_process: cell-cell signaling	insulin-like 3 precursor	8	TRUE	19:17792758-17793397
cg01419479	1	180627445	NCBI:RefSeq	36.1	CGGCGACCAGGTAAGCCCCCGGACGGCCCGGTGTCACGCAAGCGAGGCGC	180627573	-	GeneID:2752	GLUL	GS; GLNS;	NM_001033056.1	GI:74271825	glutamate-ammonia ligase (glutamine synthase); go_function: ligase activity; go_function: glutamate-ammonia ligase activity; go_process: glutamine biosynthesis; go_process: nitrogen compound metabolism; go_process: regulation of neurotransmitter levels	glutamine synthetase	128	TRUE	1:180626132-180628323
cg01419675	2	20510361	NCBI:RefSeq	36.1	CGCTGAGCATACAAGACAACAGCTCCAACCAGACTGCGGTGGCAGATGAG	20510316	+	GeneID:388	RHOB	ARH6; ARHB; RHOH6;	NM_004040.2	GI:42716309	oncogene RHO H6; Aplysia RAS-related homolog 6; go_component: nucleus; go_component: plasma membrane; go_component: endosome membrane; go_function: GTP binding; go_function: protein binding; go_function: nucleotide binding; go_process: cell cycle; go_process: angiogenesis; go_process: cell adhesion; go_process: protein transport; go_process: cell differentiation; go_process: transformed cell apop…	ras homolog gene family; member B	45	TRUE	2:20509845-20511862
cg01422337	19	53444622	NCBI:RefSeq	36.1	GTGTTTTTTCCTACTCACATTGAAGATGGCCCAGATGCTTGCACTAACCG	53444737	-	GeneID:22900	CARD8	DACAR; NDPP1; TUCAN; CARDINAL; KIAA0955;	NM_014959.1	GI:7662403	tumor up-regulated CARD-containing antagonist of caspase nine; CARD inhibitor of NF-kappaB-activating ligands; go_component: nucleus; go_function: protein binding; go_process: regulation of apoptosis	caspase recruitment domain family; member 8	115	TRUE	19:53444604-53444823
cg01427567	19	59368560	NCBI:RefSeq	36.1	CGGGGGGCCAGCCACCCCCTAGAGGAGCCCCAGGCTTCTGATTCCAAGGT	59368664	-	GeneID:147798	TMC4	MGC39329;	NM_144686.1	GI:21389588	go_component: integral to membrane	transmembrane channel-like 4	104	FALSE
cg01429181	1	158498209	NCBI:RefSeq	36.1	CGGTCCCATTTGGTCCCTGTTAGTTGGAAAGCATCTGGTGGCTTGAATTT	158498603	-	GeneID:50717	WDR42A	H326; FLJ35857; MGC99640; MGC118891; DKFZp781G1096;	NM_015726.2	GI:30089953	synonyms: H326; FLJ35857; MGC99640; MGC118891; DKFZp781G1096	H326	394	TRUE	1:158498201-158499181
cg01437411	12	6904172	NCBI:RefSeq	36.1	CGCCAGGAGAAAAGGGAAAGATGAGATGCCCACACTGAAACTAAAAGGCA	6903887	+	GeneID:1822	ATN1	B37; NOD; DRPLA; D12S755E;	NM_001940.3	GI:55750040	dentatorubral-pallidoluysian atrophy (atrophin-1); go_component: nucleus; go_component: cytoplasm; go_function: protein binding; go_process: central nervous system development	atrophin-1	285	FALSE
cg01442426	3	46044370	NCBI:RefSeq	36.1	TACCTTTTACCTGTTTAACATATACCTATCTTTCTGTGATTAGCTGCTCG	46043983	-	GeneID:2829	XCR1	GPR5; CCXCR1;	NM_005283.2	GI:66932939	lymphotactin receptor; G protein-coupled receptor 5; chemokine (C motif) XC receptor 1; go_component: integral to plasma membrane; go_function: receptor activity; go_function: chemokine receptor activity; go_function: rhodopsin-like receptor activity; go_process: chemotaxis; go_process: signal transduction; go_process: inflammatory response; go_process: elevation of cytosolic calcium ion concentr…	XC chemokine receptor 1	387	FALSE
cg01442833	12	108019781	NCBI:RefSeq	36.1	GAACCGGCGAGGCTAGCCCTGGCTGTGGCTGTGGCGGTCAGCAATTGGCG	108019798	+	GeneID:7374	UNG	DGU; UDG; UNG1; HIGM4; UNG15; DKFZp781L1143;	NM_003362.2	GI:19718744	isoform UNG1 precursor is encoded by transcript variant 1; uracil-DNA glycosylase 1; HUMAN URACIL-DNA GLYCOSYLASE 2; go_component: nucleus; go_component: mitochondrion; go_function: uracil DNA N-glycosylase activity; go_function: uracil DNA N-glycosylase activity; go_function: hydrolase activity; acting on glycosyl bonds; go_process: DNA repair; go_process: carbohydrate metabolism; go_process: ba…	uracil-DNA glycosylase isoform UNG1 precursor	17	TRUE	12:108018939-108020954
cg01454134	19	61378519	NCBI:RefSeq	36.1	CGAACAAACAAAACTGTCTCCAGACTTGGTCACATGTCCTGGGGTGAGGC	61379201	+	GeneID:85569	GALP		NM_033106.1	GI:14916444	go_component: extracellular region; go_function: neuropeptide hormone activity; go_process: neuropeptide signaling pathway	galanin-like peptide precursor	682	TRUE	19:61377980-61378572
cg01465325	10	50417594	NCBI:RefSeq	36.1	GACTTAAGGCAATGTACACATGTAAGCAGGCTCTGTAGGCACTCACTCCG	50417078	-	GeneID:2074	ERCC6	CSB; CKN2; COFS; RAD26;	NM_000124.1	GI:4557564	Cockayne syndrome group B protein; Rad26 (yeast) homolog; go_component: nucleus; go_function: ATP binding; go_function: DNA binding; go_function: helicase activity; go_function: hydrolase activity; go_function: nucleotide binding; go_function: protein binding; go_function: protein binding; go_function: DNA helicase activity; go_function: RNA polymerase II transcription factor activity; go_process…	excision repair cross-complementing rodent repair deficiency; complementation group 6	516	TRUE	10:50416443-50417898
cg01465620	3	38471100	NCBI:RefSeq	36.1	GCACGATCTTGTCTGTGCAGTCATCTGCGGGATTCTGGTTCCTAGAGGCG	38470814	+	GeneID:93	ACVR2B	ActR-IIB; MGC116908;	NM_001106.2	GI:10862697	activin A type IIB receptor; go_component: membrane; go_component: cell surface; go_component: integral to plasma membrane; go_function: ATP binding; go_function: receptor activity; go_function: nucleotide binding; go_function: protein binding; go_function: protein binding; go_function: transferase activity; go_function: transforming growth factor beta receptor activity; go_process: protein amino…	activin A type IIB receptor precursor	286	TRUE	3:38469984-38472334
cg01469547	11	7803731	NCBI:RefSeq	36.1	ACGTTTGGTACGGCCGAGTGCTTCCTGCTGGCTGCCATGGCCTATGATCG	7804095	-	GeneID:120066	OR5P3	JCG1;	NM_153445.1	GI:23592229	putative taste receptor; olfactory receptor-like protein JCG1; olfactory receptor OR11-94; go_component: integral to membrane; go_function: receptor activity; go_function: olfactory receptor activity; go_process: sensory perception; go_process: signal transduction; go_process: sensory perception of smell; go_process: G-protein coupled receptor protein signaling pathway	olfactory receptor; family 5; subfamily P; member 3	364	FALSE
cg01472101	17	6924715	NCBI:RefSeq	36.1	CGGGAGAAGCCAAGGAAAAGAGCAAATTTTATTGAGTAATCTGTGATAGG	6924324	-	GeneID:10462	CLEC10A	HML; HML2; CD301; CLECSF13; CLECSF14;	NM_006344.2	GI:53832015	isoform 2 is encoded by transcript variant 2; macrophage lectin 2 (calcium dependent); C-type (calcium dependent; carbohydrate-recognition domain) lectin; superfamily member 13 (macrophage-derived); C-type (calcium dependent; carbohydrate-recognition domain) lectin; superfamily member 14 (macrophage-derived); macrophage C-type lectin; go_component: plasma membrane; go_component: integral to membr…	C-type lectin; superfamily member 14 isoform 2	391	FALSE
cg01485797	11	800820	NCBI:RefSeq	36.1	CGAGGCAAAATCGTGATTAACAAGCTTTGGAAGTTTAATACCAGTGAGCT	799965	+	GeneID:6181	RPLP2	P2; RPP2; MGC71408; D11S2243E;	NM_001004.2	GI:16905512	60S acidic ribosomal protein P2; acidic ribosomal phosphoprotein P2; go_component: ribosome; go_component: cytosolic large ribosomal subunit (sensu Eukaryota); go_function: RNA binding; go_function: structural constituent of ribosome; go_process: protein biosynthesis; go_process: translational elongation	ribosomal protein P2	855	TRUE	11:799094-800873
cg01491225	5	80633307	NCBI:RefSeq	36.1	CGGTAGCGCGGTGAGGTGAGGTTCTCAGCCACCAAAGCTGCAGGGTCTCG	80633178	+	GeneID:84240	ZCCHC9	DKFZp761J139;	NM_032280.1	GI:14150026	go_function: metal ion binding; go_function: nucleic acid binding	zinc finger; CCHC domain containing 9	129	TRUE	5:80632781-80633508
cg01491540	17	25280550	NCBI:RefSeq	36.1	CGGTTGGGCAGTTCAAAGCCTGAACAGTACAGAGCAAAAGAAAGCCAGCA	25281144	-	GeneID:85464	SSH2	SSH-2; KIAA1725; MGC78588;	NM_033389.2	GI:37674209	go_function: protein tyrosine/serine/threonine phosphatase activity; go_process: protein amino acid dephosphorylation	slingshot 2	594	FALSE
cg01492649	11	86426885	NCBI:RefSeq	36.1	CGGGTCTCACCAAGTACAGAGGAGCATAGATCTTCAGGGACTCCTCCAGG	86426713	+	GeneID:65084	FLJ22104		NM_022918.2	GI:31377710		hypothetical protein LOC65084	172	TRUE	11:86426154-86426922
cg01495509	5	169748956	NCBI:RefSeq	36.1	GCATGGAGGCTTGCCCCAGATGGGGACCAAAAGCTGCTTCCCTGGAGACG	169749216	-	GeneID:3779	KCNMB1	SLO-BETA; hslo-beta; K(VCA)beta;	NM_004137.2	GI:25777641	Maxi K channel beta subunit; BK channel beta subunit; large conductance Ca2+-activated K+ channel beta 1 subunit; go_component: membrane; go_component: integral to membrane; go_function: ion channel activity; go_function: potassium channel regulator activity; go_function: calcium-activated potassium channel activity; go_process: ion transport; go_process: smooth muscle contraction; go_process: sy…	potassium large conductance calcium-activated channel; subfamily M; beta member 1	260	FALSE
cg01500140	19	56582398	NCBI:RefSeq	36.1	GGCCATGGCAACAGACCACTGGATGCAGTACCGGCTGTCAGGGTCCTTCG	56583009	-	GeneID:3982	LIM2	MP19;	NM_030657.2	GI:21361299	lens intrinsic membrane protein 2 (19kD); go_component: membrane; go_component: cell junction; go_component: integral to membrane; go_function: structural constituent of eye lens; go_process: intercellular junction assembly	lens intrinsic membrane protein 2; 19kDa	611	FALSE
cg01500421	5	140051056	NCBI:RefSeq	36.1	CGCCGCACGCTCTGCCATCCCGGCTGTCCACTTGAGCCGCCTGCTGTCTC	140051202	+	GeneID:23438	HARSL	HO3; HARSR;	NM_012208.2	GI:18201901	HARS-related; histidine-tRNA ligase homolog; hisRS; histidine translase; go_component: cytoplasm; go_function: ATP binding; go_function: ligase activity; go_function: nucleotide binding; go_function: histidine-tRNA ligase activity; go_process: protein biosynthesis; go_process: histidyl-tRNA aminoacylation	histidyl-tRNA synthetase-like	146	TRUE	5:140050724-140051702
cg01536400	9	123963104	NCBI:RefSeq	36.1	TCTGTGTTTCCTCTGCTTCTCTCTACTACAGCTCTTACCACACTGAATCG	123961919	-	GeneID:4702	NDUFA8	PGIV; MGC793; CI-19KD; CI-PGIV;	NM_014222.2	GI:33519464	NADH dehydrogenase (ubiquinone) 1 alpha subcomplex; 8 (19kD; PGIV); NADH-ubiquinone oxidoreductase 19 kDa subunit; NADH:ubiquinone oxidoreductase PGIV subunit; go_component: mitochondrion; go_function: oxidoreductase activity; go_function: NADH dehydrogenase activity; go_function: NADH dehydrogenase (ubiquinone) activity	NADH dehydrogenase (ubiquinone) 1 alpha subcomplex; 8; 19kDa	1185	FALSE
cg01541443	7	30151840	NCBI:RefSeq	36.1	CGCCTACTCACAGGCCGATCTGGGTAAAGAATGTCTTGTTCCAAGTTAAT	30151942	+	GeneID:222166	Ells1	FLJ25903;	NM_152793.1	GI:23618862	synonym: FLJ25903	hypothetical protein LOC222166	102	FALSE
cg01546430	5	156540414	NCBI:RefSeq	36.1	AGAGAGCTGCTCAAGGGCAACTTGCCTTCAACGTTATCTTTCTATCAACG	156540485	+	GeneID:3702	ITK	EMT; LYK; PSCTK2; MGC126257; MGC126258;	NM_005546.3	GI:21614549	homolog of mouse T-cell itk/tsk; tyrosine-protein kinase ITK/TSK; tyrosine-protein kinase LYK; go_function: ATP binding; go_function: kinase activity; go_function: zinc ion binding; go_function: metal ion binding; go_function: nucleotide binding; go_function: transferase activity; go_function: protein serine/threonine kinase activity; go_function: non-membrane spanning protein tyrosine kinase act…	IL2-inducible T-cell kinase	71	FALSE
cg01546563	8	11604598	NCBI:RefSeq	36.1	GCTTGTTCATGACACCCGAGTTAAATGGAGACTTTGCAGTCGCTTGCACG		+	GeneID:2626	GATA4	9606;	NT_077531.3	GATA binding protein 4	GATA-binding protein 4; go_component: nucleus; go_component: nucleus; go_component: nucleus; go_function: DNA binding; go_function: protein binding; go_function: zinc ion binding; go_function: metal ion binding; go_function: sequence-specific DNA binding; go_function: transcription factor activity; go_function: transcription factor activity; go_function: transcriptional activator activity; go_fun…			TRUE	8:11602473-11604934
cg01550148	5	134763443	NCBI:RefSeq	36.1	TTGCACATGGAAGCGGTTAGCTACTTCGCTTCAGCAAAAGTTCACTTTCG	134763476	-	GeneID:9555	H2AFY	H2A.y; H2A/y; H2AFJ; mH2A1; H2AF12M; MACROH2A1.1; macroH2A1.2;	NM_004893.2	GI:20336744	isoform 2 is encoded by transcript variant 2; histone macroH2A1.2; histone macroH2A1.1; H2A histone family; member Y isoform 2 variant; go_component: nucleus; go_component: chromosome; go_component: nucleosome; go_component: Barr body; go_component: nucleosome; go_function: DNA binding; go_function: DNA binding; go_process: nucleosome assembly; go_process: dosage compensation; go_process: nucleos…	H2A histone family; member Y isoform 2	33	TRUE	5:134761885-134763912
cg01555431	6	151603719	NCBI:RefSeq	36.1	GCAAACTCAGGAGTGCGAACCCCTCTTTGGAGGCTTTTCAGGGTCTTTCG	151603202	+	GeneID:9590	AKAP12	AKAP250; DKFZp686M0430; DKFZp686O0331;	NM_005100.2	GI:21493021	kinase scaffold protein isoform 1 is encoded by transcript variant 1; kinase scaffold protein gravin; A-kinase anchor protein; 250kDa; myasthenia gravis autoantigen gravin; go_component: cytoplasm; go_function: protein binding; go_function: protein kinase A binding; go_process: protein targeting; go_process: signal transduction; go_process: G-protein coupled receptor protein signaling pathway	A-kinase anchor protein 12 isoform 1	517	TRUE	6:151602349-151604472
cg01556075	19	7647454	NCBI:RefSeq	36.1	CGGGAACTAACCACTGGAACGCCACACCCACATCTGGGACTGAGGACAGA	7647514	+	GeneID:199675	MCEMP1		NM_174918.1	GI:27885012		mast cell-expressed membrane protein 1	60	FALSE
cg01561916	2	42873673	NCBI:RefSeq	36.1	CGCCAGCACCGTGTTCTCAGGTGCTGGGACTTCCAACCCGCGATCTCCTC	42873219	-	GeneID:23498	HAAO	HAO; 3-HAO;	NM_012205.1	GI:6912405	go_function: iron ion binding; go_function: oxidoreductase activity; go_function: electron transporter activity; go_function: quinolinate synthetase A activity; go_function: 3-hydroxyanthranilate 3;4-dioxygenase activity; go_process: metabolism	3-hydroxyanthranilate 3;4-dioxygenase	454	TRUE	2:42873041-42874496
cg01578324	6	31812753	NCBI:RefSeq	36.1	CGCCAGCACTCCCTGAGCTGCCCAGACTGGTGTCTCAGTAGGTCCTGTGC	31812320	-	GeneID:1192	CLIC1	G6; NCC27;	NM_001288.4	GI:48375182	p64CLCP; chloride channel ABP; RNCC protein; nuclear chloride ion channel protein; go_component: membrane; go_component: cytoplasm; go_component: nuclear envelope; go_component: soluble fraction; go_component: membrane fraction; go_function: protein binding; go_function: calcium channel activity; go_function: voltage-gated chloride channel activity; go_process: ion transport; go_process: chloride…	chloride intracellular channel 1	433	FALSE
cg01593190	5	178705399	NCBI:RefSeq	36.1	CGTCCCCACCTAGAGAGCCCTTGGGGTGCCGGGTCCCACCCATCAGCCCT	178704935	-	GeneID:9509	ADAMTS2	NPI; PCINP; PCPNI; hPCPNI; ADAM-TS2; ADAMTS-3;	NM_021599.1	GI:11038658	isoform 2 is encoded by transcript variant 2; procollagen I N-proteinase; a disintegrin-like and metalloprotease (reprolysin type) with thrombospondin type 1 motif; 2; procollagen N-endopeptidase; go_component: extracellular matrix (sensu Metazoa); go_function: metal ion binding; go_function: collagenase activity; go_function: procollagen N-endopeptidase activity; go_process: collagen catabolism	ADAM metallopeptidase with thrombospondin type 1 motif; 2 isoform 2	464	TRUE	5:178703214-178705508
cg01594915	2	177786439	NCBI:RefSeq	36.1	AGGTAGTGCTTTCGCTGAAGTTCTGCCGACGCTTTTCTAGGCCTTTTACG	177785774	+	GeneID:220988	HNRPA3	FBRNP; D10S102; hnRNPA3; 2610510D13Rik;	NM_194247.1	GI:34740328	go_component: nucleus; go_component: ribonucleoprotein complex; go_function: RNA binding; go_function: nucleotide binding	heterogeneous nuclear ribonucleoprotein A3	665	TRUE	2:177785083-177786533
cg01605517	1	245148496	NCBI:RefSeq	36.1	TCATAGCTCACTGGAGGCGCAGCCTCGAACTTCTGGGATCAGTTCATCCG	245148302	-	GeneID:25909	AHCTF1	ELYS; MST108; TMBS62; MSTP108; DKFZp434N093;	NM_015446.3	GI:67551264	ELYS transcription factor-like protein TMBS62	transcription factor ELYS	194	FALSE
cg01610240	1	222368759	NCBI:RefSeq	36.1	GCTCCCTTCCCGGGGAACGCGCTCCCTTCTCATCTCCCAGACCTCGGCCG	222368436	+	GeneID:23219	FBXO28	Fbx28; FLJ10766; KIAA0483;	NM_015176.1	GI:7662157	go_process: ubiquitin cycle	F-box protein 28	323	TRUE	1:222368316-222369404
cg01610488	8	73150424	NCBI:RefSeq	36.1	CGCCCCGCCTGCTTCCTGCACTACAAAAGTAGCGCGGGCCTGAGAACTCC	73150373	-	GeneID:8989	TRPA1	ANKTM1;	NM_007332.1	GI:6601589	ankyrin-like with transmembrane domains 1; go_component: membrane; go_component: membrane fraction; go_component: integral to plasma membrane; go_function: cation channel activity; go_function: channel or pore class transporter activity; go_process: cation transport; go_process: sensory perception	ankyrin-like protein 1	51	TRUE	8:73149852-73150676
cg01612158	1	155834344	NCBI:RefSeq	36.1	CGCCCACAGCAGCATGGAAGCCTGCTCCAGGATTGGAGAAGGAGTTCTGA	155834494	-	GeneID:83417	FCRL4	FCRH4; IGFP2; IRTA1; dJ801G22.1;	NM_031282.1	GI:14550415	immunoglobulin superfamily receptor translocation associated 1; go_function: receptor activity	Fc receptor-like 4	150	FALSE
cg01636591	17	29670269	NCBI:RefSeq	36.1	CTCCTGTTACCCACAGAGGGGTAGGCCCTTGGCTCTCTTCCACTATGACG	29670179	+	GeneID:6355	CCL8	HC14; MCP2; MCP-2; SCYA8; SCYA10;	NM_005623.2	GI:22538815	small inducible cytokine subfamily A (Cys-Cys); member 8 (monocyte chemotactic protein 2); monocyte chemoattractant protein 2; go_component: membrane; go_component: extracellular space; go_function: heparin binding; go_function: chemokine activity; go_function: signal transducer activity; go_function: signal transducer activity; go_process: chemotaxis; go_process: exocytosis; go_process: sensory …	small inducible cytokine A8 precursor	90	FALSE
cg01638025	8	25097685	NCBI:RefSeq	36.1	CGGGCGCGCAATAAATATTTGTTGAATGAATGAGCAGTTGACTTCTGCCT	25098204	+	GeneID:80005	DOCK5	DKFZp451J181; DKFZp779M164; DKFZp781J211;	NM_024940.4	GI:45439361	go_function: GTP binding; go_function: GTPase binding; go_function: guanyl-nucleotide exchange factor activity	dedicator of cytokinesis 5	519	TRUE	8:25097416-25098881
cg01651364	11	95762299	NCBI:RefSeq	36.1	TTTCTCGGTGCAGAGCTCTTTTGGGGTCTGGGGGTTTCCGTCGTCCTGCG	95762709	-	GeneID:79780	FLJ23518		NM_024725.2	GI:19923843		hypothetical protein LOC79780	410	TRUE	11:95762097-95763324
cg01653445	1	32002822	NCBI:RefSeq	36.1	CGCCGCCAGGGTGTCCCGGGCCCTGCAGGCTGAAGCATTTGCTCACCTTC	32002223	-	GeneID:576	BAI2		NM_001703.1	GI:4502356	Brain-specific angiongenesis inhibitor-2; go_component: membrane; go_component: integral to membrane; go_component: integral to membrane; go_function: receptor activity; go_function: G-protein coupled receptor activity; go_function: G-protein coupled receptor activity; go_function: brain-specific angiogenesis inhibitor activity; go_function: brain-specific angiogenesis inhibitor activity; go_proc…	brain-specific angiogenesis inhibitor 2	599	TRUE	1:32000877-32002964
cg01655341	19	46595537	NCBI:RefSeq	36.1	CTGGAGTTTGCGTCAGGCACATAAAGAGGCAGCCCCGAATCTAGCCTACG	46595096	-	GeneID:56915	EXOSC5	p12B; RRP46; RRP41B; Rrp46p; hRrp46p; MGC12901;	NM_020158.3	GI:47174863	go_component: cytoplasm; go_component: nucleolus; go_component: exosome (RNase complex); go_function: RNA binding; go_function: hydrolase activity; go_function: protein binding; go_function: exonuclease activity; go_function: 3prime-5prime-exoribonuclease activity; go_process: rRNA processing	exosome component Rrp46	441	TRUE	19:46594759-46595742
cg01658815	10	116434030	NCBI:RefSeq	36.1	CGGTCTAACCTTTGTAGTCTCCCATGGTGTGATGAGGGTCCGTGAGCTCA	116434404	-	GeneID:3983	ABLIM1	ABLIM; LIMAB1; LIMATIN; MGC1224; FLJ14564; KIAA0059; DKFZp781D0148;	NM_002313.5	GI:51173710	isoform a is encoded by transcript variant 1; actin-binding double-zinc-finger protein; LIM actin-binding protein 1; go_component: actin cytoskeleton; go_function: actin binding; go_function: zinc ion binding; go_function: actin binding; go_function: metal ion binding; go_function: protein binding; go_process: visual perception; go_process: organ morphogenesis; go_process: cytoskeleton organizati…	actin-binding LIM protein 1 isoform a	374	FALSE
cg01663469	3	120904357	NCBI:RefSeq	36.1	CGGGGAGGCTGGGAGAAAGCTACTCTTAAGTCATTGATTTGCCAGTTACA	120904563	+	GeneID:89876	C3orf15	AAT1; AAT1alpha; DKFZp781A2221;	NM_033364.2	GI:38569418	MYCBP-binding protein; go_component: mitochondrion	AAT1-alpha	206	FALSE
cg01665633	15	27349434	NCBI:RefSeq	36.1	CTCTGTTTGCATGGTTTGGTAACAACACTTCACTATACTAAAAATCATCG	27349309	-	GeneID:56160	NDNL2	HCA4; MAGEG1; MAGEL3;	NM_138704.2	GI:29826297	necdin-like gene 2; hepatocellular carcinoma-associated protein HCA4; melanoma antigen; family G; 1; go_component: nucleus; go_process: regulation of cell growth	necdin-like 2	125	TRUE	15:27348312-27349567
cg01667384	19	54669078	NCBI:RefSeq	36.1	CAGTGCATGGTGAGCTGGGGCTGGAACCCGGATCTGTCTCTGGGAACTCG	54669298	+	GeneID:2323	FLT3LG		NM_001459.2	GI:38455415	go_component: membrane; go_component: extracellular space; go_component: integral to membrane; go_component: soluble fraction; go_function: cytokine activity; go_process: signal transduction; go_process: positive regulation of cell proliferation	fms-related tyrosine kinase 3 ligand	220	TRUE	19:54669027-54669358
cg01668383	13	36577573	NCBI:RefSeq	36.1	GTTACAGGGCGTGGAGTCAGCCTGATCCCTGCAGCACACCAGGATTTCCG	36577803	-	GeneID:122011	CSNK1A1L	MGC33182; RP11-532O21.2;	NM_145203.2	GI:34222183	casein kinase I alpha S-like; go_function: ATP binding; go_function: nucleotide binding; go_function: transferase activity; go_function: protein serine/threonine kinase activity; go_process: Wnt receptor signaling pathway; go_process: protein amino acid phosphorylation	casein kinase 1; alpha 1-like	230	TRUE	13:36577453-36577918
cg01668465	2	224175388	NCBI:RefSeq	36.1	CGTCACCGGGTTCAGCCACAAACCCCAGCACAAGCGAGGTTTTTCAAAGA	224175365	-	GeneID:7857	SCG2	CHGC; SgII;	NM_003469.3	GI:68160946	EM66 precursor; Chromogranin C (secretogranin II); secretoneurin precursor; go_function: calcium ion binding; go_process: protein secretion	secretogranin II precursor	23	TRUE	2:224175201-224175460
cg01669948	6	39398855	NCBI:RefSeq	36.1	GGCTGAGTGAGACAATCACCTGTCTATTTACTTTGCCCTGATTTGTCACG	39398294	-	GeneID:83795	KCNK16	TALK1; TALK-1;	NM_032115.2	GI:16753201	pancreatic 2P domain potassium channel TALK-1; go_component: membrane; go_component: integral to membrane; go_function: ion channel activity; go_function: potassium ion binding; go_function: potassium channel activity; go_function: voltage-gated ion channel activity; go_process: ion transport; go_process: potassium ion transport	potassium channel; subfamily K; member 16	561	FALSE
cg01683883	16	65170554	NCBI:RefSeq	36.1	CGAGAGGAAGCAGGTGTTCTCGATAAAAGCAGCAGCCCTAATTTTATGGT	65170852	+	GeneID:146225	CMTM2	CKLFSF2; MGC39436;	NM_144673.2	GI:31563435	chemokine-like factor super family 2; go_component: membrane; go_component: extracellular space; go_component: integral to membrane; go_function: cytokine activity; go_process: chemotaxis; go_process: sensory perception	chemokine-like factor superfamily 2	298	TRUE	16:65170077-65171345
cg01692572	8	144982775	NCBI:RefSeq	36.1	CGCACCAGAAGCCAGTTCCCACCCAGGGTGCCATTTGCTGGGCGCCCTAG	144983525	-	GeneID:22827	SIAHBP1	FIR; PUF60; RoBPI;	NM_014281.3	GI:17978510	isoform b is encoded by transcript variant 2; siah binding protein 1; pyrimidine tract binding splicing factor; Ro ribonucleoprotein-binding protein 1; poly-U binding splicing factor PUF60; go_component: ribonucleoprotein complex; go_function: nucleotide binding; go_function: protein binding; go_function: nucleic acid binding	fuse-binding protein-interacting repressor isoform b	750	TRUE	8:144982748-144984142
cg01703884	12	108362557	NCBI:RefSeq	36.1	AGAGGGTCCTCAGATCATCTCTTGAGGGATGCTATTCTAGGAAGGCTACG	108362755	+	GeneID:283446	FLJ37587		NM_173597.1	GI:27734768	go_component: myosin; go_function: motor activity	myosin 1H	198	TRUE	12:108362343-108362608
cg01718365	1	23218230	NCBI:RefSeq	36.1	CGTAGTAGGCAAGCATTAATAAATACTGGTTGAATTAACGAATAATTGGG	23218533	+	GeneID:23028	AOF2	LSD1; BHC110; KIAA0601;	NM_015013.2	GI:58761545	isoform b is encoded by transcript variant 2; FAD-binding protein BRAF35-HDAC complex; 110 kDa subunit; lysine-specific histone demethylase 1; BRAF35-HDAC complex protein BHC110; go_component: nucleus; go_function: protein binding; go_function: oxidoreductase activity; go_process: transcription; go_process: electron transport; go_process: chromatin modification; go_process: regulation of transcri…	amine oxidase (flavin containing) domain 2 isoform b	303	TRUE	1:23218216-23219536
cg01720228	17	4433683	NCBI:RefSeq	36.1	CTTTATGATATAGCGAAAACTTAGAGTTAGCTTTGCCCATCATCCCATCG	4434043	+	GeneID:342527	FLJ42461	MGC131847;	NM_198501.1	GI:38348315	synonym: MGC131847	hypothetical protein LOC342527	360	FALSE
cg01723464	4	6693021	NCBI:RefSeq	36.1	GAGGGTGGCCTCTTCTGGGTGTTTCCCTCCGATAGGGCTTCTTGAGCACG	6693346	+	GeneID:93621	MRFAP1	PGR1; PAM14;	NM_033296.1	GI:15193293	T-cell activation protein; protein associated with MRG; 14 kDa	Mof4 family associated protein 1	325	TRUE	4:6692135-6694398
cg01724150	3	140880053	NCBI:RefSeq	36.1	CGCCAGACCTCAAAGCAGGGAAGGATTTCTGGGGCCTGAAGCATACACAG	140879530	-	GeneID:349565	NMNAT3	PNAT3; PNAT-3;	NM_178177.2	GI:31342325	pyridine nucleotide adenylyltransferase 3; go_component: nucleus; go_function: transferase activity; go_function: nicotinamide-nucleotide adenylyltransferase activity; go_process: biosynthesis; go_process: NAD biosynthesis	nicotinamide nucleotide adenylyltransferase 3	523	FALSE
cg01729862	16	1764042	NCBI:RefSeq	36.1	CGGAACCTTCTCCAGCCAGCTCGGCTCTATACCAGCAGAACGGCTTGGGC	1763141	-	GeneID:65993	MRPS34	MGC2616; MRP-S12; MRP-S34;	NM_023936.1	GI:13027603	go_component: mitochondrion; go_component: ribonucleoprotein complex; go_function: structural constituent of ribosome	mitochondrial ribosomal protein S34	901	TRUE	16:1760150-1764076
cg01731685	22	15945455	NCBI:RefSeq	36.1	CGTCCAGTGACCCACAAGAGAAGCAAGAAGTCTGAACAGGGCCAAGAATC	15945858	+	GeneID:23765	IL17R	CDw217; IL17RA; IL-17RA; hIL-17R; MGC10262;	NM_014339.3	GI:23238207	go_component: membrane; go_component: integral to plasma membrane; go_function: receptor activity; go_function: interleukin-17 receptor activity; go_process: cell surface receptor linked signal transduction	interleukin 17 receptor precursor	403	TRUE	22:15945411-15947155
cg01732037	1	166516842	NCBI:RefSeq	36.1	AGGGGTGTCATCCTAGGAGCTTAGGCAAGAGCCAGGGTATCTTCTCTCCG	166516902	+	GeneID:9095	TBX19	TPIT; TBS19; TBS 19; dJ747L4.1;	NM_005149.1	GI:4827023	go_component: nucleus; go_function: transcription factor activity; go_function: RNA polymerase II transcription factor activity; go_process: transcription; go_process: morphogenesis; go_process: regulation of transcription; DNA-dependent; go_process: regulation of transcription from RNA polymerase II promoter	T-box 19	60	FALSE
cg01734338	11	2447807	NCBI:RefSeq	36.1	CGCCCAGGTTGAAGTGCTTGGTGCTATGACGGCTCACTGCAGTTCCAACT		+	GeneID:3784	KCNQ1	LQT; RWS; WRS; LQT1; ATFB1; KCNA8; KCNA9; Kv1.9; Kv7.1; KVLQT1;	NT_009237.17	potassium voltage-gated channel; KQT-like subfamily; member 1 isoform 1	isoform 1 is encoded by transcript variant 1; kidney and cardiac voltage dependend K+ channel; slow delayed rectifier channel subunit; long (electrocardiographic) QT syndrome; Ward-Romano syndrome 1; go_component: membrane; go_component: membrane fraction; go_component: integral to membrane; go_component: voltage-gated potassium channel complex; go_component: voltage-gated potassium channel compl…			TRUE	11:2447407-2447956
cg01735903	8	22158614	NCBI:RefSeq	36.1	CGGTCTCCGCGCCGGGCGGAAGTCTGCGTGGCAGGGCCTGGGCGCCGCCA	22158564	+	GeneID:661	POLR3D	RPC4; BN51T; TSBN51;	NM_001722.2	GI:55769551	BN51 (BHK21) temperature sensitivity complementing; temperature sensitive complementation; cell cycle specific; tsBN51; go_component: nucleus; go_function: DNA binding; go_function: transferase activity; go_function: DNA-directed RNA polymerase activity; go_process: transcription; go_process: tRNA metabolism; go_process: regulation of progression through cell cycle	RNA polymerase III 53 kDa subunit RPC4	50	TRUE	8:22157862-22159202
cg01737532	4	191099164	NCBI:RefSeq	36.1	TCTTGGTTCCCTTGAGCACGAGCTTGGTAGACTTCACGTAGGAGTACTCG	191098968	+	GeneID:2483	FRG1	FSG1;	NM_004477.2	GI:73695875	facioscapulohumeral muscular dystrophy region gene-1; go_component: nucleus; go_process: rRNA processing	FSHD region gene 1	196	TRUE	4:191098165-191099605
cg01739167	17	4747123	NCBI:RefSeq	36.1	CGGAGCCCTTGCCATCCTGCTGCGTGGTTCTCAGGGTTATTCTGAGCTCT	4747148	-	GeneID:1145	CHRNE	ACHRE; CMS1D; CMS1E; CMS2A; FCCMS; SCCMS;	NM_000080.2	GI:38327653	AchR epsilon subunit; cholinergic receptor; nicotinic; epsilon polypeptide; go_component: postsynaptic membrane; go_component: nicotinic acetylcholine-gated receptor-channel complex; go_function: ion channel activity; go_function: cation transporter activity; go_function: acetylcholine receptor activity; go_function: extracellular ligand-gated ion channel activity; go_function: nicotinic acetylch…	nicotinic acetylcholine receptor epsilon polypeptide precursor	25	FALSE
cg01747191	6	109556643	NCBI:RefSeq	36.1	CCAACATTTATTCACTATACTCCAAACAAATTCACTAGGATCTATCATCG	109557200	+	GeneID:285753	C6orf182	MGC21731; MGC70837; bA487F23.2;	NM_173830.3	GI:34222237	go_component: cellular component unknown; go_function: molecular function unknown; go_process: biological process unknown	hypothetical protein LOC285753	557	FALSE
cg01761409	11	87547840	NCBI:RefSeq	36.1	CGTCTGAAACTTCAAGTGCATTCCCTGGCGCTTTTGGGCTATTGCTTTAG	87548247	-	GeneID:23682	RAB38	rrGTPbp; NY-MEL-1;	NM_022337.1	GI:11641236	Rab-related GTP-binding protein; go_component: cellular component unknown; go_function: ATP binding; go_function: GTP binding; go_function: nucleotide binding; go_function: GTPase activity; go_function: protein kinase activity; go_process: intracellular protein transport; go_process: protein amino acid phosphorylation; go_process: small GTPase mediated signal transduction	RAB38	407	TRUE	11:87547744-87548663
cg01773061	1	36635594	NCBI:RefSeq	36.1	CGACCAGCCACCCGGCTGCAGCCTGATGAATCTGCGATCAAGCAAAGGTA	36636080	-	GeneID:84967	LSM10	MST074; MSTP074; MGC15749;	NM_032881.1	GI:14249631	U7 snRNP-specific Sm-like protein LSM10; U7 snRNA-associated Sm-like protein LSM10; go_component: nucleus; go_component: small nucleolar ribonucleoprotein complex; go_function: RNA binding; go_function: protein binding; go_process: nuclear mRNA splicing; via spliceosome	LSM10; U7 small nuclear RNA associated	486	TRUE	1:36635589-36636388
cg01784199	1	78243094	NCBI:RefSeq	36.1	CGTCCTGTAGCATTTGCTGTTCTAGAAAGTACAGAGACACGTAGTGAAAA	78243224	+	GeneID:11080	DNAJB4	DjB4; HLJ1; DNAJW;	NM_007034.3	GI:24431959	DnaJ-like heat shock protein 40; go_function: heat shock protein binding; go_function: unfolded protein binding; go_process: protein folding; go_process: response to heat; go_process: response to unfolded protein	DnaJ (Hsp40) homolog; subfamily B; member 4	130	FALSE
cg01785568	4	4915734	NCBI:RefSeq	36.1	CGGCCCATGTGGGCTACAGCATGTACCACCTGACATAGAGGGTCCCAGGT		+	GeneID:4487	MSX1	HOX7; HYD1; OFC5;	NT_006051.17	msh homeo box homolog 1	msh (Drosophila) homeo box homolog 1 (formerly homeo box 7); go_component: nucleus; go_function: transcription factor activity; go_process: development; go_process: skeletal development; go_process: regulation of transcription; DNA-dependent			TRUE	4:4915141-4915899
cg01794265	5	14635549	NCBI:RefSeq	36.1	CCAGAGTATTCTGTGTTGTTAGCAAGTCTCGACTGCCGCGAAGGTGTGCG	14634932	+	GeneID:54491	FAM105A	FLJ11127;	NM_019018.1	GI:9506640	synonym: FLJ11127	hypothetical protein LOC54491	617	TRUE	5:14634345-14635936
cg01794711	18	70314178	NCBI:RefSeq	36.1	TCCGGAGCTGTGGGCTTGTGCTGTGCTTCCCGGTTGCTCTTGGGTGGGCG	70314577	+	GeneID:55748	CNDP2	CN2; CPGL; PEPA; HsT2298; FLJ10830;	NM_018235.1	GI:8922698	peptidase A; cytosolic nonspecific dipeptidase; go_function: hydrolase activity; go_function: carboxypeptidase activity; go_function: metallopeptidase activity; go_function: protein dimerization activity; go_process: proteolysis	CNDP dipeptidase 2 (metallopeptidase M20 family)	399	TRUE	18:70313798-70315100
cg01795697	17	59933463	NCBI:RefSeq	36.1	CTTTGACGGGTTTTGGTCGGCGGAGAATGGTCTCTAAACTTCCCAAACCG	59932869	-	GeneID:1655	DDX5	p68; HLR1; G17P1; HUMP68; DKFZp686J01190;	NM_004396.2	GI:13514826	DEAD/H (Asp-Glu-Ala-Asp/His) box polypeptide 5 (RNA helicase; 68kD); DEAD box-5; go_component: nucleus; go_function: ATP binding; go_function: RNA binding; go_function: hydrolase activity; go_function: nucleotide binding; go_function: RNA helicase activity; go_function: ATP-dependent helicase activity; go_process: cell growth	DEAD (Asp-Glu-Ala-Asp) box polypeptide 5	594	TRUE	17:59931838-59934159
cg01803810	17	71023914	NCBI:RefSeq	36.1	CTGAGGAGCCGGCGTCTGGAGTGCAGTGCGAATGGTCACACTTGTGACCG	71024235	+	GeneID:283989	TSEN54	sen54; SEN54L; FLJ37147;	NM_207346.1	GI:46559740	go_component: nucleus; go_process: mRNA processing; go_process: tRNA processing	tRNA splicing endonuclease 54 homolog (SEN54; S. cerevisiae)	321	TRUE	17:71022571-71025073
cg01804844	18	71125307	NCBI:RefSeq	36.1	CGCTCCAGCTGCCTACTACAGGCCCACGACTGCACAGCGGAGCGACTTCA	71125161	+	GeneID:10194	SDCCAG33	TSH1; NY-CO-33;	NM_005786.3	GI:38201676	go_component: nucleus; go_function: zinc ion binding; go_function: metal ion binding; go_function: sequence-specific DNA binding; go_function: transcription factor activity; go_process: development; go_process: regulation of transcription; DNA-dependent	serologically defined colon cancer antigen 33	146	FALSE
cg01806928	11	7229380	NCBI:RefSeq	36.1	CGGGTGTGCCCAGATTGTAACCTTCGCACTAGGCATCCAAGAACGTGCTT	7229757	+	GeneID:143425	SYT9	FLJ45896;	NM_175733.2	GI:31342257	go_component: synapse; go_component: membrane; go_component: synaptic vesicle; go_component: integral to membrane; go_function: calcium ion binding; go_function: transporter activity; go_process: transport	synaptotagmin IX	377	TRUE	11:7229230-7230968
cg01808090	16	10745392	NCBI:RefSeq	36.1	CGCACAGCCGCTGGTTGGGGCATCCCTGACATGAAGCCCCTCTGCCCGCC	10745218	+	GeneID:4682	NUBP1	NBP; NBP1; MGC117406; MGC130052; MGC130053;	NM_002484.1	GI:4505336	nucleotide binding protein 1 (E.coli MinD like); nucleotide binding protein (e.coli MinD like); go_function: ATP binding; go_function: nucleotide binding; go_function: nucleoside-triphosphatase activity; go_process: septin ring assembly	nucleotide binding protein 1 (MinD homolog; E. coli)	174	TRUE	16:10744982-10745953
cg01808508	3	63984576	NCBI:RefSeq	36.1	TTTGTGCCTCATTTGTCTTACCTACTAAATAGGCTAATAGTACTACCTCG	63984160	-	GeneID:9861	PSMD6	S10; p44S10; KIAA0107; SGA-113M;	NM_014814.1	GI:7661913	proteasome regulatory particle subunit p44S10; go_component: proteasome complex (sensu Eukaryota); go_function: ATPase activity; go_function: protein binding; go_process: ATP-dependent proteolysis	proteasome (prosome; macropain) 26S subunit; non-ATPase; 6	416	FALSE
cg01819863	10	32675820	NCBI:RefSeq	36.1	CGCCCGCGCCCGAAACGACAGTTTACTCATCTCAGGCGCAGCAGATACCT	32676119	-	GeneID:80314	EPC1	Epl1; DKFZp781P2312;	NM_025209.2	GI:24475703	enhancer of polycomb homolog 1; (Drosophila) (EPC1); go_component: nucleus; go_function: transcriptional activator activity; go_function: transcriptional repressor activity; go_process: transcription; go_process: chromatin modification; go_process: regulation of cell growth; go_process: regulation of transcription; DNA-dependent	enhancer of polycomb 1	299	TRUE	10:32674946-32676775
cg01827098	7	149842085	NCBI:RefSeq	36.1	CGTAGCCAACTGGAATATCTGGTCAACCGTGAGAGCTTTGGGAACCTGCC	149842878	+	GeneID:168537	GIMAP7	IAN7; hIAN7; MGC27027;	NM_153236.3	GI:55774985	immune associated nucleotide; go_function: GTP binding; go_function: nucleotide binding	GTPase; IMAP family member 7	793	TRUE	7:149841790-149842156
cg01836044	13	60887204	NCBI:RefSeq	36.1	CTTACCGGCAGGTTCCTGTAGCTGGTGCTGCTCCTGGGACGATGTAGACG	60887282	-	GeneID:64881	PCDH20	PCDH13; FLJ22218;	NM_022843.2	GI:21536447	protocadherin 13; go_component: membrane; go_component: integral to membrane; go_function: protein binding; go_function: calcium ion binding; go_process: cell adhesion; go_process: homophilic cell adhesion	protocadherin 20	78	TRUE	13:60886730-60887871
cg01846065	2	152740615	NCBI:RefSeq	36.1	GGGGCAGCGACAAAGGCCTTGGGAGGACGCCCATGGTCGGAGGGATCTCG	152740752	-	GeneID:10254	STAM2	Hbp; STAM2A; STAM2B; DKFZp564C047;	NM_005843.3	GI:21265030	STAM-like protein containing SH3 and ITAM domains 2; go_component: membrane; go_function: protein binding; go_process: intracellular protein transport	signal transducing adaptor molecule 2	137	TRUE	2:152739982-152741292
cg01848594	16	79598825	NCBI:RefSeq	36.1	CGTTCCCGTAGCCACACACCTCTGCTGCGCTCCAACAGGCAATGCGAGGA	79597991	-	GeneID:56942	C16orf61	DC13; 2310061C15Rik;	NM_020188.2	GI:42476040	DC13 protein	hypothetical protein LOC56942	834	TRUE	16:79597334-79599889
cg01851399	12	32941484	NCBI:RefSeq	36.1	CCTCCGGGATCCCCGAGCGAGTAGTATGTCTGGTTAGTCAGGCTTTGTCG	32940993	-	GeneID:5318	PKP2	ARVD9;	NM_004572.2	GI:52630430	isoform 2b is encoded by transcript variant 2b; go_component: nucleus; go_component: cytoskeleton; go_component: desmosome; go_component: plasma membrane; go_component: integral to membrane; go_function: protein binding; go_function: structural molecule activity; go_process: cell-cell adhesion	plakophilin 2 isoform 2b	491	TRUE	12:32940472-32941602
cg01861509	10	73519632	NCBI:RefSeq	36.1	CGCCAGGACACACCCAGGAAGAATGCTTTATTACTGTGAGATGAAGACGT	73518773	-	GeneID:9806	SPOCK2	testican-2;	NM_014767.1	GI:7662035	go_component: extracellular matrix (sensu Metazoa); go_function: calcium ion binding; go_process: synaptogenesis; go_process: regulation of cell differentiation; go_process: extracellular matrix organization and biogenesis	sparc/osteonectin; cwcv and kazal-like domains proteoglycan (testican) 2	859	FALSE
cg01868128	1	150750299	NCBI:RefSeq	36.1	ACGGGATTTCAGCATGTTGGTCAGTCTCGAACTCCTGACCTCTTGACCCG	150749944	+	GeneID:254910	LCE5A	LEP18; SPRL5A;	NM_178438.3	GI:58331248	late envelope protein 18; small proline rich-like (epidermal differentiation complex) 5A	late cornified envelope 5A	355	FALSE
cg01871995	8	17798643	NCBI:RefSeq	36.1	CGAGGTCACACAGCTAACAAGAGGTATAGCTGGGCTCAAAGGCAATCCTG	17797327	-	GeneID:2267	FGL1	HFREP1; HP-041; LFIRE1; MGC12455;	NM_004467.3	GI:42544188	hepassocin; hepatocyte-derived fibrinogen-related protein 1; hepatocellular carcinoma-related sequence; go_component: fibrinogen complex	fibrinogen-like 1 precursor	1316	FALSE
cg01873645	9	73716469	NCBI:RefSeq	36.1	GTGCTTCTGAGGTCTGGAACGAGCCACGTTGCCTTTCTGGGAGCTCATCG	73716243	+	GeneID:138241	C9orf85	MGC61599; RP11-346E17.2;	NM_182505.3	GI:38327628	isoform a is encoded by transcript variant 1	hypothetical protein LOC138241 isoform a	226	TRUE	9:73714799-73716688
cg01880569	16	81217829	NCBI:RefSeq	36.1	CGGGGGACTGGCGGCCACTTCCAGCCTAGTGCAAAAAGATTCTCTTTATT	81218079	+	GeneID:1012	CDH13	CDHH;	NM_001257.3	GI:61676095	H-cadherin; heart-cadherin; T-cadherin; truncated-cadherin; P105; go_component: membrane; go_function: protein binding; go_function: calcium ion binding; go_process: cell adhesion; go_process: homophilic cell adhesion	cadherin 13 preproprotein	250	TRUE	16:81217810-81219323
cg01888166	2	20391116	NCBI:RefSeq	36.1	CGCCATGTCCCGTGTATAAATTACACTGGGATTTTCAGATGACGCCTGAA	20390625	-	GeneID:23369	PUM2	PUMH2; PUML2; KIAA0235;	NM_015317.1	GI:13491167	pumilio (Drosphila) homolog 2; go_function: binding; go_function: RNA binding; go_process: regulation of translation	pumilio homolog 2	491	FALSE
cg01889448	6	32743849	NCBI:RefSeq	36.1	TGCTCTAGAATTATGCACTGAATAATACAGAATATTGGAGTGGCTCAACG	32742419	-	GeneID:3119	HLA-DQB1	IDDM1; CELIAC1; HLA-DQB; HLA DQB1;	NM_002123.2	GI:24797068	MHC class II cell surface protein; MHC class II HLA-DQ beta glycoprotein; MHC class II antigen HLA-DQ-beta-1; MHC DQ beta protein; MHC class II antigen variant; MHC class2 antigen; major histocompatibility complex class II beta chain; lymphocyte antigen; go_component: membrane; go_component: membrane; go_component: integral to membrane; go_function: MHC class I receptor activity; go_function: MHC…	major histocompatibility complex; class II; DQ beta 1 precursor	1430	FALSE
cg01900048	2	128175202	NCBI:RefSeq	36.1	CGCAGTGAGGCCATAAGACATTTCCGTCAGCAAAAGGGTCACTTCTTGTG	128175067	+	GeneID:84826	SFT2D3	MGC5391;	NM_032740.3	GI:49355756	synonym: MGC5391	SFT2 domain containing 3	135	TRUE	2:128175176-128176549
cg01906717	9	21358203	NCBI:RefSeq	36.1	CGGCTCTAAACTCATGTAAAGAGTTCAAGAAGGAAAGCAAAAACAGAAAT	21358075	-	GeneID:3447	IFNA13		NM_006900.2	GI:13128965	go_component: extracellular space; go_function: interferon-alpha/beta receptor binding; go_function: hematopoietin/interferon-class (D200-domain) cytokine receptor binding; go_process: defense response; go_process: response to virus	interferon; alpha 13	128	FALSE
cg01909833	6	33045245	NCBI:RefSeq	36.1	CGCCTGGGAACAACCTCAGTTCACAACATGGGTGGCCAACTCCTAAAGCA	33044415	+	GeneID:6046	BRD2	NAT; RNF3; FSRG1; RING3; D6S113E; KIAA9001; DKFZp686N0336;	NM_005104.2	GI:12408641	female sterile homeotic-related gene 1; bromodomain-containing 2; go_component: nucleus; go_function: protein serine/threonine kinase activity; go_process: spermatogenesis	bromodomain containing protein 2	830	TRUE	6:33045213-33045462
cg01911082	8	114518448	NCBI:RefSeq	36.1	CGCACAAGAAAAGACAGAATCCAGAGTAGCGGAGACTTTGTGCCCCCGTT	114518418	-	GeneID:114788	CSMD3	KIAA1894;	NM_052900.2	GI:38045885	isoform 3 is encoded by transcript variant c; go_component: integral to membrane	CUB and Sushi multiple domains 3 isoform 3	30	TRUE	8:114518007-114518526
cg01936270	2	38157184	NCBI:RefSeq	36.1	ACCTAAGATAAAATTTAAACAACCAACCAGGGGCGCTGTGAGGCAAACCG	38156796	-	GeneID:1545	CYP1B1	CP1B; GLC3A;	NM_000104.2	GI:13325059	aryl hydrocarbon hydroxylase; microsomal monooxygenase; xenobiotic monooxygenase; flavoprotein-linked monooxygenase; cytochrome P450; subfamily I (dioxin-inducible); polypeptide 1 (glaucoma 3; primary infantile); go_component: membrane; go_component: microsome; go_component: endoplasmic reticulum; go_function: heme binding; go_function: iron ion binding; go_function: metal ion binding; go_functio…	cytochrome P450; family 1; subfamily B; polypeptide 1	388	TRUE	2:38154099-38158196
cg01938354	14	44501161	NCBI:RefSeq	36.1	TACATCACCATGGAAGCAATCGGTTTGGTCACGTGGTGCCCTTGGTTACG	44501161	+	GeneID:23116	KIAA0423	DKFZp686D12126;	NM_015091.1	GI:44888819	go_function: binding	hypothetical protein LOC23116	0	TRUE	14:44500155-44502139
cg01939428	7	156623931	NCBI:RefSeq	36.1	GAACAGGTGGGATGTAAACAGACGGGCTGGGCCTAGCTGCTCCTTTCCCG	156624425	+	GeneID:9690	UBE3C	KIAA10; KIAA0010;	NM_014671.1	GI:7661855	ubiquitin-protein isopeptide ligase (E3); go_component: nucleus; go_function: ligase activity; go_function: protein binding; go_function: protein binding; go_function: ubiquitin-protein ligase activity; go_process: ubiquitin cycle; go_process: protein polyubiquitination	ubiquitin protein ligase E3C	494	TRUE	7:156623773-156625371
cg01939479	15	28983274	NCBI:RefSeq	36.1	CGTGGAAAGGAAAGGAGATCGATCACTCGAGCCTCCACTTGCCAAGCCTG	28983421	+	GeneID:22909	KIAA1018		NM_014967.3	GI:62198230	go_function: DNA binding; go_process: DNA repair	hypothetical protein LOC22909	147	TRUE	15:28982900-28983818
cg01943185	4	56196873	NCBI:RefSeq	36.1	CTCTCACCTTTACTTGGCTTCTGGGACTTCACTTGGCTTCTCTGGTGCCG	56197222	-	GeneID:10874	NMU		NM_006681.1	GI:5729946	go_function: receptor binding; go_process: digestion; go_process: signal transduction; go_process: neuropeptide signaling pathway; go_process: regulation of smooth muscle contraction	neuromedin U	349	TRUE	4:56196371-56197553
cg01956781	6	170457845	NCBI:RefSeq	36.1	CGCCAACACCAGCCGCAGACGCGCCCGCTGCACCCTAGGCCCAGCCGCCT	170457769	+	GeneID:84498	KIAA1838	KIAA0183; dJ894D12.1;	NM_032448.1	GI:24308333	KIAA1838-like protein	hypothetical protein LOC84498	76	TRUE	6:170457028-170458319
cg01957330	7	26870995	NCBI:RefSeq	36.1	GCAGTTGTGATGGCACCAGTACCGAAAATGGCTGTAAGGCGCTCCGGACG	26870866	-	GeneID:8935	SCAP2	PRAP; RA70; SAPS; SKAP55R; MGC10411; MGC33304; SKAP-HOM;	NM_003930.3	GI:38202227	src kinase-associated phosphoprotein of 55-related protein; src-associated adaptor protein; Fyn-associated phosphoprotein SKAP55 homologue; Pyk2/RAFTK-associated protein; go_component: plasma membrane; go_function: kinase activity; go_function: SH3/SH2 adaptor activity; go_process: signal transduction; go_process: protein complex assembly	src family associated phosphoprotein 2	129	TRUE	7:26870108-26871408
cg01959004	11	118433621	NCBI:RefSeq	36.1	GGCTTTGGATAGACGTTGGAGAATGGCTGTCCCTCGGACTGAGTCCGTCG	118433122	-	GeneID:10525	HYOU1	ORP150; DKFZp686N08236;	NM_006389.2	GI:13699861	oxygen regulated protein (150kD); 150 kDa oxygen-regulated protein; go_component: endoplasmic reticulum; go_function: ATP binding; go_function: nucleotide binding; go_function: unfolded protein binding; go_process: protein folding; go_process: response to stress	oxygen regulated protein precursor	499	TRUE	11:118432492-118433746
cg01962826	6	34208945	NCBI:RefSeq	36.1	CGCCCGCATTCTGGACACCTGCTCCAGGGACACCCATGCCCTCGAGCAGT	34209421	-	GeneID:2914	GRM4	mGlu4; GPRC1D; MGLUR4;	NM_000841.1	GI:4504140	go_component: membrane; go_component: integral to plasma membrane; go_function: receptor activity; go_function: metabotropic glutamate; GABA-B-like receptor activity; go_function: metabotropic glutamate; GABA-B-like receptor activity; go_process: signal transduction; go_process: synaptic transmission; go_process: G-protein coupled receptor protein signaling pathway; go_process: negative regulatio…	glutamate receptor; metabotropic 4	476	TRUE	6:34208803-34209092
cg01968793	10	101078920	NCBI:RefSeq	36.1	CGGGTACACACTTCGGTATATCTGAGATGCAGCCTGAAAAGTCTGGGTTT	101080023	+	GeneID:26507	CNNM1	ACDP1;	NM_020348.1	GI:9966788	ancient conserved domain protein 1	cyclin M1	1103	TRUE	10:101078809-101080801
cg01970325	9	139474062	NCBI:RefSeq	36.1	CGCCCTACCTGCCTGGCCTGCATTTGCCGCCCTAGGGCTCTCAGGCCCCA	139473575	-	GeneID:26012	NELF	MGC125369; RP11-48C7.1;	NM_015537.3	GI:46397395	nasal embryonic luteinizing hormone-releasing hormone factor	nasal embryonic LHRH factor	487	FALSE
cg01971122	11	14950505	NCBI:RefSeq	36.1	TGGGCAGTGTCTCTGATGCCTCCCAGCGCCAGCGACTGCTCTTATTCCCG		-	GeneID:796	CALCA	CT; KC; CGRP; CALC1; CGRP1; CGRP-I; MGC126648;	NT_009237.17	calcitonin isoform CALCA preproprotein	isoform CALCA preproprotein is encoded by transcript variant 1; katacalcin; go_component: soluble fraction; go_component: extracellular space; go_component: endoplasmic reticulum; go_function: hormone activity; go_process: cell-cell signaling; go_process: skeletal development; go_process: phospholipase C activation; go_process: adenylate cyclase activation; go_process: regulation of blood pressur…			TRUE	11:14949913-14950639
cg01980222	6	41238895	NCBI:RefSeq	36.1	CAGTCCTGACTATTGCTTAATCCCCAGGAGCCCAGTTCCTGTGGGCAGCG	41238892	-	GeneID:54209	TREM2	TREM-2; Trem2a; Trem2b; Trem2c;	NM_018965.1	GI:9507202	triggering receptor expressed on myeloid cells 2a; go_component: integral to membrane; go_function: receptor activity; go_process: humoral immune response	triggering receptor expressed on myeloid cells 2	3	FALSE
cg01982455	5	149809443	NCBI:RefSeq	36.1	CGCCCGGGCCTCCTACCTGCACGTCGTCTCCAGACTCCACACCGGAAAGA	149809512	-	GeneID:6208	RPS14	EMTB;	NM_005617.3	GI:68160909	emetine resistance; 40S ribosomal protein S14; go_component: ribosome; go_component: ribosome; go_function: structural constituent of ribosome; go_function: structural constituent of ribosome; go_process: protein biosynthesis; go_process: protein biosynthesis	ribosomal protein S14	69	TRUE	5:149808793-149810019
cg01982597	10	50403426	NCBI:RefSeq	36.1	TCAGTTCCACAGTTGCATTTGCCCTTTTTCAAGTGCTCAAGAGCTACACG	50402332	-	GeneID:267004	PGBD3	FLJ90201;	NM_170753.1	GI:25777743	synonym: FLJ90201	hypothetical protein LOC267004	1094	FALSE
cg01990225	2	96769746	NCBI:RefSeq	36.1	CCCCCCTTATTTGCATTTGCCCTGAGTTCCACTAGGCTTGCTGGGATACG	96769528	-	GeneID:81562	LMAN2L	VIPL; MGC11139; DKFZp564L2423;	NM_030805.1	GI:13540593	VIP36-like; go_component: membrane; go_component: Golgi apparatus; go_component: integral to membrane; go_component: ER to Golgi transport vesicle; go_component: endoplasmic reticulum membrane; go_function: sugar binding; go_function: mannose binding; go_process: protein folding; go_process: protein transport; go_process: ER to Golgi vesicle-mediated transport	lectin; mannose-binding 2-like	218	TRUE	2:96769075-96769795
cg01990334	1	42573921	NCBI:RefSeq	36.1	CGGACGCCTTTTCCGACCTGGCACACCGCGGATTCCGGGACCCCCAACAA	42573490	-	GeneID:22887	FOXJ3		NM_014947.3	GI:50345830		forkhead box J3	431	TRUE	1:42572813-42574121
cg01992081	17	50853957	NCBI:RefSeq	36.1	CGGCTCCCGGCTCCTCACCTGGATTCATCCTGGGTGGATCCCGCACCTTG	50854340	-	GeneID:23531	MMD	MMA; PAQR11;	NM_012329.2	GI:52630444	macrophage maturation-associated; progestin and adipoQ receptor family member XI; go_component: membrane fraction; go_component: integral to plasma membrane; go_function: receptor activity; go_process: cytolysis	monocyte to macrophage differentiation-associated precursor	383	TRUE	17:50853138-50854708
cg01995513	7	24579093	NCBI:RefSeq	36.1	CAGCATTTACGGGTGGGCAAGATACTCCTCGGGGCATAAAACAGGCTCCG	24579610	+	GeneID:51678	MPP6	VAM1; p55T; PALS2; VAM-1;	NM_016447.2	GI:21361597	MAGUK protein p55T; protein associated with Lin7 2; VELI-associated MAGUK 1; go_component: membrane; go_function: protein binding; go_process: protein complex assembly	membrane protein; palmitoylated 6	517	TRUE	7:24578836-24580584
cg01998785	16	54100210	NCBI:RefSeq	36.1	TAGGGTCGGACGGACCTGGATTTTCAATCCCTTTTACTGGGCCTGTGACG	54100455	+	GeneID:54947	AYTL1	FLJ20481; DKFZp686H22112;	NM_017839.3	GI:47106078	go_function: calcium ion binding; go_function: acyltransferase activity; go_process: metabolism	hypothetical protein LOC54947	245	FALSE
cg01999333	19	15023623	NCBI:RefSeq	36.1	GAGCAGGGCAAGTGACCCATGTGTTTGCCTCTTCTACCTAGGAGATGACG	15024015	+	GeneID:23581	CASP14	MGC119078; MGC119079;	NM_012114.1	GI:6912285	caspase 14; apoptosis-related cysteine protease; apoptosis-related cysteine protease; go_function: caspase activity; go_function: cysteine-type peptidase activity; go_process: apoptosis; go_process: proteolysis; go_process: epidermis development	caspase 14 precursor	392	FALSE
cg02000005	14	105024687	NCBI:RefSeq	36.1	GTCATGCCCAAGTGTCCCAAGTGCAACAAGGAGGTGTACTTCGGTGAGCG	105024594	+	GeneID:1396	CRIP1	CRHP; CRIP; CRP1;	NM_001311.3	GI:39725694	cysteine-rich heart protein; go_component: cytoplasm; go_function: metal ion binding; go_function: zinc ion binding; go_process: cell proliferation; go_process: antimicrobial humoral response (sensu Vertebrata)	cysteine-rich protein 1 (intestinal)	93	TRUE	14:105023580-105025363
cg02005755	7	135063389	NCBI:RefSeq	36.1	CGTCCTGGGAGCGACCAGCAGCCCCACCTGAAGTCCGCATGCAACTCTGA	135063473	-	GeneID:26266	SLC13A4	SUT1; SUT-1;	NM_012450.2	GI:31795545	sulphate transporter 1; solute carrier family 13 (sodium/sulphate symporters); member 4; go_component: membrane; go_component: integral to plasma membrane; go_function: sodium ion binding; go_function: symporter activity; go_function: transporter activity; go_function: sodium:sulfate symporter activity; go_process: ion transport; go_process: sodium ion transport; go_process: sulfate transport; go…	solute carrier family 13 (sodium/sulfate symporters); member 4	84	FALSE
cg02017109	5	76824351	NCBI:RefSeq	36.1	CGGCTGTACACATGAGCCACTGGATTTGTCTGGATGCAGAAGTCTACTGC	76824088	-	GeneID:55255	WDR41	MSTP048; FLJ10904;	NM_018268.2	GI:42716286	synonyms: MSTP048; FLJ10904	WD repeat domain 41	263	TRUE	5:76823331-76824380
cg02022375	17	36451247	NCBI:RefSeq	36.1	CGGCAGTGGAATAGGCAGCCATAATTCAGAAACTCCTCCAAGCAACCCAA	36451239	-	GeneID:81851	KRTAP1-1	HB2A; KAP1.1; KAP1.6; KAP1.7; KAP1.1A; KAP1.1B; KRTAP1A; KRTAP1.1;	NM_030967.2	GI:15619004	keratin associated protein 1A; go_component: keratin filament; go_component: extracellular region; go_function: structural constituent of epidermis; go_process: biological process unknown	keratin associated protein 1-1	8	FALSE
cg02028524	14	91643163	NCBI:RefSeq	36.1	ACCCAGCACTTGTATAAAAATGATAGCTAGGCCGGGCGAGGTGCTTCACG	91642707	-	GeneID:4287	ATXN3	AT3; JOS; MJD; ATX3; MJD1; SCA3;	NM_004993.3	GI:66932882	isoform 1 is encoded by transcript variant 1; josephin; Machado-Joseph disease (spinocerebellar ataxia 3; olivopontocerebellar ataxia 3; autosomal dominant; ataxin 3); go_component: cytoplasm; go_component: nucleoplasm; go_process: transcription; go_process: synaptic transmission; go_process: nervous system development; go_process: nucleotide-excision repair; go_process: regulation of transcripti…	ataxin 3 isoform 1	456	TRUE	14:91641896-91643508
cg02064402	5	1278719	NCBI:RefSeq	36.1	GCAGGTGGGTGCTTACCTCCTCCATAGGTCTGGCACAGGTATGGGAACCG	1278470	+	GeneID:348932	SLC6A18	Xtrp2; FLJ31236;	NM_182632.1	GI:32699071	sodium channel-like protein; solute carrier family 6 (neurotransmitter transporter); member 18; go_component: membrane; go_component: integral to plasma membrane; go_function: symporter activity; go_function: ion channel activity; go_function: neurotransmitter:sodium symporter activity; go_process: neurotransmitter transport	solute carrier family 6; member 18	249	FALSE
cg02084087	1	6448636	NCBI:RefSeq	36.1	ATCGGAAAGGGCGGCCAACCCAGCCCCCAGTGAGGCTTGGAGTGGAGACG	6448842	-	GeneID:8718	TNFRSF25	DR3; TR3; DDR3; LARD; APO-3; TRAMP; WSL-1; WSL-LR; TNFRSF12;	NM_003790.2	GI:23200019	isoform 2 precursor is encoded by transcript variant 2; translocating chain-association membrane protein; death domain receptor 3; death domain receptor 3 soluble form; apoptosis-mediating receptor; lymphocyte associated receptor of death; death receptor beta; apoptosis inducing receptor; tumor necrosis factor receptor superfamily; member 12; go_component: membrane; go_component: cytosol; go_comp…	tumor necrosis factor receptor superfamily; member 25 isoform 2 precursor	206	TRUE	1:6448532-6449318
cg02092466	2	11728082	NCBI:RefSeq	36.1	AGCACCATGTCTATTTATGCTGCAGGTAGAAACTTCCACACACACGTTCG	11727876	-	GeneID:23620	NTSR2	NTR2;	NM_012344.2	GI:21735622	neurotensin receptor; type 2; levocabastine-sensitive neurotensin receptor; go_component: integral to plasma membrane; go_function: receptor activity; go_function: rhodopsin-like receptor activity; go_function: neurotensin receptor activity; G-protein coupled; go_process: sensory perception; go_process: G-protein coupled receptor protein signaling pathway	neurotensin receptor 2	206	FALSE
cg02100828	2	54051842	NCBI:RefSeq	36.1	CAGGACAATAGCTTGGAATTCGGCCTCGTGTTTCCGGTGAGGCAGCCTCG	54051354	-	GeneID:23198	PSME4	PA200; KIAA0077; MGC138374;	NM_014614.1	GI:40788002	proteasome activator 200 kDa; go_function: binding	proteasome (prosome; macropain) activator subunit 4	488	TRUE	2:54050578-54052146
cg02105034	1	181708488	NCBI:RefSeq	36.1	GAGCGGGCCGCAGGTTGGGGCATGGAGCAACAGACACCGAGGTAAGTCCG	181708257	+	GeneID:9887	SMG7	EST1C; SMG-7; SGA56M; C1orf16; KIAA0250;	NM_173156.1	GI:42475557	isoform 1 is encoded by transcript variant 1; ever shorter telomeres 1C; breast cancer-associated antigen SGA-56M; go_component: nucleus; go_function: binding; go_process: mRNA catabolism; nonsense-mediated decay	SMG-7 homolog isoform 1	231	TRUE	1:181707527-181709091
cg02105377	3	65999594	NCBI:RefSeq	36.1	CGGCGCGGAATAGAATGAACTGTAACAAAACAAGCCGAGCCTTTGTATCT	65999549	-	GeneID:9223	MAGI1	AIP3; BAP1; WWP3; BAIAP1; MAGI-1; TNRC19;	NM_004742.2	GI:66346707	isoform b is encoded by transcript variant 2; WW domain-containing protein 3; atrophin-1 interacting protein 3; BAI1-associated protein 1; trinucleotide repeat-containing gene 19; membrane associated guanylate kinase inverted-1; go_component: tight junction; go_component: plasma membrane; go_function: ATP binding; go_function: kinase activity; go_function: nucleotide binding; go_function: transfe…	membrane associated guanylate kinase; WW and PDZ domain containing 1 isoform b	45	TRUE	3:65998327-66000971
cg02113971	14	20527656	NCBI:RefSeq	36.1	AAAGACTGTTTCTGGGAGTACTGACTTCCTGTGTTCTTTGCATTCCTCCG	20527805	+	GeneID:64745	FLJ20859		NM_001029991.1	GI:71999134	isoform 1 is encoded by transcript variant 1; false p73 target	FLJ20859 protein isoform 1	149	TRUE	14:20527551-20528537
cg02119229	11	111551458	NCBI:RefSeq	36.1	CCAAATCCTCTCACACTGGCAGTTTTGAGTACTACTAAACAGTGAACACG	111551568	+	GeneID:83875	BCDO2	FLJ34464; B-DIOX-II;	NM_031938.2	GI:41350209	putative b;b-carotene-9 ;10 -dioxygenase; go_component: intracellular; go_function: iron ion binding; go_function: oxidoreductase activity; go_function: oxidoreductase activity; acting on single donors with incorporation of molecular oxygen; incorporation of two atoms of oxygen; go_function: oxidoreductase activity; acting on single donors with incorporation of molecular oxygen; incorporation of …	beta-carotene dioxygenase 2	110	FALSE
cg02123547	6	37245442	NCBI:RefSeq	36.1	GAGGGGCGTATCGATTCAAACCCAAACAATAACAAAGCCATCAAAGGCCG	37245964	+	GeneID:5292	PIM1	PIM;	NM_002648.2	GI:31543400	Oncogene PIM1; pim-1 oncogene (proviral integration site 1); pim-1 kinase 44 kDa isoform; go_component: nucleus; go_component: cytoplasm; go_function: ATP binding; go_function: metal ion binding; go_function: nucleotide binding; go_function: transferase activity; go_function: manganese ion binding; go_function: protein serine/threonine kinase activity; go_process: development; go_process: cell pr…	pim-1 oncogene	522	TRUE	6:37244855-37247571
cg02124291	19	14800260	NCBI:RefSeq	36.1	TAAGCCACCGTGCCCAGCCAGAAGTTCTTATTCTAACTGCAGAATGTACG	14800276	-	GeneID:26659	OR7A5	HTPCR2;	NM_017506.1	GI:9506798	olfactory receptor; family 7; subfamily A; member 5 pseudogene; olfactory receptor OR19-17; go_component: membrane; go_component: integral to membrane; go_component: integral to membrane; go_function: receptor activity; go_function: olfactory receptor activity; go_function: olfactory receptor activity; go_process: sensory perception; go_process: signal transduction; go_process: spermatogenesis; g…	olfactory receptor; family 7; subfamily A; member 5	16	FALSE
cg02125271	15	22751499	NCBI:RefSeq	36.1	TGTTCAGAGGCTTGCTGTTGTGCCGTTCTGCCCCGATGGTATCCTGTCCG	22751228	+	GeneID:8926	SNURF		NM_022804.1	GI:13027654	go_component: nucleus; go_function: molecular function unknown; go_process: biological process unknown	SNRPN upstream reading frame protein	271	TRUE	15:22751044-22752323
cg02154956	13	99539411	NCBI:RefSeq	36.1	TGCGGGGACAACAATGGCGGGGTTCTGGGTCGGGACAGCACCGCTGGTCG	99539338	+	GeneID:5095	PCCA		NM_000282.2	GI:65506441	propionyl-CoA carboxylase alpha chain; mitochondrial; PCCase alpha subunit; propanoyl-CoA:carbon dioxide ligase alpha subunit; pccA complementation group; go_component: mitochondrion; go_function: ATP binding; go_function: ligase activity; go_function: biotin binding; go_function: nucleotide binding; go_function: propionyl-CoA carboxylase activity; go_process: metabolism; go_process: fatty acid m…	propionyl-Coenzyme A carboxylase; alpha polypeptide precursor	73	TRUE	13:99538859-99539849
cg02157083	11	116168010	NCBI:RefSeq	36.1	GGGTTAGAGCACCACGCTCCCTGCTATGTGACTGAGGTAGCAAGAGCACG	116167794	-	GeneID:116519	APOA5	RAP3; APOAV; APOA-V; MGC126836; MGC126838;	NM_052968.3	GI:63079708	regeneration-associated protein 3; apolipoprotein A5; go_component: chylomicron; go_component: extracellular region; go_component: endoplasmic reticulum; go_function: lipid binding; go_function: lipid transporter activity; go_process: lipid transport; go_process: lipoprotein metabolism; go_process: tissue regeneration; go_process: regulation of lipid biosynthesis	apolipoprotein AV	216	FALSE
cg02159896	18	11898181	NCBI:RefSeq	36.1	CGGGCGCAAGAATACATACAACAGCCATGCTTTCCAGCTCTGCGCACAAC	11898641	-	GeneID:65258	MPPE1		NM_023075.3	GI:59889563	isoform a precursor is encoded by transcript variant 1; metallo phosphoesterase; go_function: hydrolase activity	metallophosphoesterase 1 isoform a precursor	460	TRUE	18:11898083-11899267
cg02164046	3	188870842	NCBI:RefSeq	36.1	GACGGTTGAGAGCACACAAGCCGCTTTAGGAGCGAGGTTCGGAGCCATCG	188870895	-	GeneID:6750	SST	SMST;	NM_001048.3	GI:71979669	somatostatin-14; somatostatin-28; go_component: extracellular region; go_function: hormone activity	somatostatin preproprotein	53	TRUE	3:188870156-188871038
cg02164386	17	40281062	NCBI:RefSeq	36.1	GAGTCTCAGCTGCTTACATCCAGGTCCAGGATTATGTCTGCTAACAGACG	40280805	+	GeneID:51751	HIGD1B	CLST11240; CLST11240-15;	NM_016438.2	GI:21314672	CLST 11240-15 protein	CLST 11240 protein	257	FALSE
cg02186948	11	36267430	NCBI:RefSeq	36.1	CGGAGCAGGAATTGGGAACAAATTGACCCTGGTTTGGAGCCACAACTCTG	36267555	-	GeneID:29099	COMMD9	HSPC166; FLJ31106;	NM_014186.1	GI:7661827	synonyms: HSPC166; FLJ31106	COMM domain containing 9	125	TRUE	11:36267394-36267874
cg02187357	6	37332194	NCBI:RefSeq	36.1	CGCCAGAGAAAGGCAAGTAAAATAATTAAAAGAATAGAGGGGCTTTTTTT	37333526	+	GeneID:55633	TBC1D22B	C6orf197; FLJ20337; MGC125626; MGC125627; dJ744I24.2; RP4-744I24.2; DKFZp762J0110;	NM_017772.2	GI:40068062	go_function: GTPase activator activity	TBC1 domain family; member 22B	1332	FALSE
cg02187914	8	104102248	NCBI:RefSeq	36.1	CGTCAGCGCCACTGCAGGTTTCTGCGGGTCAGAAATTGTCTCCAACCCCC	104102445	+	GeneID:528	ATP6V1C1	VATC; Vma5; ATP6C; ATP6D; FLJ20057;	NM_001695.3	GI:55956925	isoform A is encoded by transcript variant 1; ATPase; H+ transporting; lysosomal 42kD; V1 subunit C; isoform 1; ATPase; H+ transporting; lysosomal (vacuolar proton pump) 42kD; vacuolar proton-ATPase; subunit C; VI domain; H+-transporting ATPase chain C; vacuolar; ATPase; H+ transporting; lysosomal 42kDa; V1 subunit C; isoform 1; vacuolar proton pump C subunit; vacuolar ATP synthase subunit C; V-A…	ATPase; H+ transporting; lysosomal 42kDa; V1 subunit C1 isoform A	197	TRUE	8:104102141-104103092
cg02192520	12	54400422	NCBI:RefSeq	36.1	CGCCTGGCATCCAAGTCCACCCACTCCGGACTTTGGCCTTAGCAGTAGTT	54400488	+	GeneID:5959	RDH5	RDH1;	NM_002905.2	GI:50726951	go_component: membrane; go_function: oxidoreductase activity; go_function: retinol dehydrogenase activity; go_process: metabolism; go_process: sensory perception; go_process: visual perception	retinol dehydrogenase 5 (11-cis and 9-cis)	66	FALSE
cg02192965	2	44356244	NCBI:RefSeq	36.1	CGGGTTTGTCCATAATGAAGACATTCTGGAGCAGACCCCGGATCCAGGAA	44356103	+	GeneID:6519	SLC3A1	D2H; ATR1; NBAT; RBAT; CSNU1;	NM_000341.2	GI:23308570	solute carrier family 3 (cystine; dibasic and neutral amino acid transporters); member 1; amino acid transporter 1; SLC3A1 variant F; SLC3A1 variant G; SLC3A1 variant B; SLC3A1 variant C; SLC3A1 variant D; SLC3A1 variant E; go_component: membrane; go_component: membrane fraction; go_component: integral to plasma membrane; go_function: alpha-amylase activity; go_function: L-cystine transporter act…	solute carrier family 3; member 1	141	FALSE
cg02196805	5	131437536	NCBI:RefSeq	36.1	CTCTCACTTACCATCTCAGCAGCAGTGTCTCTACTCAGGTTCAGGAGACG	131437384	+	GeneID:1437	CSF2	GMCSF; MGC131935;	NM_000758.2	GI:27437029	sargramostim; molgramostin; granulocyte-macrophage colony stimulating factor; go_component: extracellular space; go_function: cytokine activity; go_function: granulocyte macrophage colony-stimulating factor receptor binding; go_process: development; go_process: cellular defense response; go_process: cell surface receptor linked signal transduction	colony stimulating factor 2 precursor	152	FALSE
cg02198044	15	54073628	NCBI:RefSeq	36.1	TCTTGTCGGTTAAGGGTGTCATTCCCATAAGAAGCTGGACCTGGGGACCG	54073127	-	GeneID:4734	NEDD4	KIAA0093;	NM_198400.1	GI:38257150	isoform 2 is encoded by transcript variant 2; go_component: intracellular; go_function: ligase activity; go_function: ubiquitin-protein ligase activity; go_process: ubiquitin cycle	neural precursor cell expressed; developmentally down-regulated 4 isoform 2	501	TRUE	15:54072444-54073732
cg02198582	16	2039377	NCBI:RefSeq	36.1	CGCACATGGGCTAGGTCGTTATCTTTTATGTGTGTTTGTGTCTTTGTCAC	2038600	+	GeneID:7249	TSC2	LAM; TSC4; uberin; TUBERIN;	NM_000548.2	GI:10938006	isoform 1 is encoded by transcript variant 1; tuberin isoform 1; tuberin isoform 2; tuberin isoform 3; go_component: cytosol; go_component: plasma membrane; go_component: membrane fraction; go_function: unfolded protein binding; go_function: GTPase activator activity; go_process: cell cycle; go_process: endocytosis; go_process: protein folding; go_process: negative regulation of progression throu…	tuberous sclerosis 2 isoform 1	777	FALSE
cg02202484	1	151209312	NCBI:RefSeq	36.1	CGGATGGTCCTGGTGCTAGCCTCACAGTGAGTGCTCAAGAAATGGCAGCA	151209752	+	GeneID:163778	SPRR4		NM_173080.1	GI:27436868	go_function: structural molecule activity; go_process: keratinization	small proline rich protein 4	440	FALSE
cg02210887	4	156806130	NCBI:RefSeq	36.1	CAGACGAGGACAACAGCAACAACAAAGTCTTTATACAAGCCTGCAACACG	156807328	+	GeneID:2982	GUCY1A3	GUCA3; GC-SA3; GUC1A3; GUCSA3;	NM_000856.2	GI:67763815	GC-S-alpha-1; soluble guanylate cyclase large subunit; go_component: guanylate cyclase complex; soluble; go_function: receptor activity; go_function: guanylate cyclase activity; go_process: circulation; go_process: cGMP biosynthesis; go_process: nitric oxide mediated signal transduction	guanylate cyclase 1; soluble; alpha 3	1198	FALSE
cg02212737	17	71611344	NCBI:RefSeq	36.1	AGTGGGAGCCGCGGGGTTCAGAGCGATGATTCCCCCACAGGAGGCATCCG	71611451	-	GeneID:23265	EXOC7	EX070; EXO70; EXOC1; 2-5-3p; Exo70p; YJL085W;	NM_015219.2	GI:62241043	isoform b is encoded by transcript variant 2; go_component: exocyst; go_process: exocytosis; go_process: protein transport	exocyst complex component 7 isoform b	107	TRUE	17:71611215-71611981
cg02217159	6	63054656	NCBI:RefSeq	36.1	CGGCTCGAAGAAATATTGTGCAGAGACATGATTGAGGTGTACAATCATTA	63054091	-	GeneID:202559	KHDRBS2	SLM1; SLM-1; MGC26664; bA535F17.1;	NM_152688.1	GI:22749380	Sam68-like mammalian protein 1; go_function: protein binding; go_function: nucleic acid binding	KH domain-containing; RNA-binding; signal transduction-associated protein 2	565	TRUE	6:63053381-63054670
cg02218214	1	62835077	NCBI:RefSeq	36.1	CGAGCACATGGTAAAGAGCCTAGAACACAGAGACACAGAACACAGTGGAG	62835775	+	GeneID:27329	ANGPTL3	ANGPT5;	NM_014495.2	GI:41327750	angiopoietin 5; go_component: extracellular region; go_function: protein binding; go_function: integrin binding; go_function: enzyme inhibitor activity; go_process: lipid catabolism; go_process: cell-matrix adhesion; go_process: triacylglycerol metabolism; go_process: integrin-mediated signaling pathway; go_process: positive regulation of angiogenesis; go_process: positive regulation of lipid met…	angiopoietin-like 3 precursor	698	FALSE
cg02226697	8	126079447	NCBI:RefSeq	36.1	GCTGTGTCTGATTCCTCTTTCGGACTCCGGGGACTGACATATCATAAGCG	126079901	+	GeneID:6713	SQLE		NM_003129.3	GI:62865634	go_component: microsome; go_component: integral to membrane; go_function: monooxygenase activity; go_function: oxidoreductase activity; go_function: squalene monooxygenase activity; go_function: squalene monooxygenase activity; go_process: metabolism; go_process: electron transport; go_process: sterol biosynthesis; go_process: aromatic compound metabolism	squalene monooxygenase	454	TRUE	8:126079172-126080536
cg02241259	1	67405147	NCBI:RefSeq	36.1	GCTTTTTCTATAAAACTACAAGAGAACGCAATGCATGGCTCATCATATCG	67404757	+	GeneID:149233	IL23R		NM_144701.2	GI:24430211	IL-23R; interleukin-23 receptor; go_function: receptor activity	interleukin 23 receptor precursor	390	FALSE
cg02241586	2	208839753	NCBI:RefSeq	36.1	TGGTATCGTTTCTGCAGCTCATGAACTTTCTTTTCCAGCCTACGGATGCG	208839236	+	GeneID:200576	PIP5K3	CFD; PIP5K; PIKfyve; KIAA0981; MGC40423;	NM_015040.2	GI:50881947	isoform 2 is encoded by transcript variant 2; phosphatidylinositol-4-phosphate 5-kinase; type III; 1-phosphatidylinositol-4-phosphate 5-kinase; PtdIns(4)P-5-kinase; FYVE finger-containing phosphoinositide kinase; go_component: lipid raft; go_function: ATP binding; go_function: kinase activity; go_function: protein binding; go_function: zinc ion binding; go_function: metal ion binding; go_function…	phosphatidylinositol-3- phosphate/phosphatidylinositol 5-kinase; type III isoform 2	517	TRUE	2:208838805-208839779
cg02246665	12	102982136	NCBI:RefSeq	36.1	CGTCCACTTTAATTGAGCATCTAGGATGTGTGGGCGAGGCAGTCTCACAA	102982457	+	GeneID:29915	HCFC2	HCF2; HCF-2;	NM_013320.1	GI:7019404	transcription factor; similar to HCF1 C1: GenBank Accession Number L20010; host cell factor 2; go_component: nucleus; go_component: cytoplasm; go_function: transcription coactivator activity; go_function: RNA polymerase II transcription factor activity; go_process: viral life cycle; go_process: regulation of transcription from RNA polymerase II promoter	host cell factor C2	321	TRUE	12:102981770-102983356
cg02250594	18	53254351	NCBI:RefSeq	36.1	TCAGCGTGGTGTAGGTGTTGCTCATGCCCATGCCAGGCGGAGACGAGTCG	53253915	+	GeneID:9480	ONECUT2	OC2; OC-2; MGC120377; MGC120378;	NM_004852.1	GI:4758847	onecut 2; go_component: nucleus; go_function: transcription factor activity; go_function: RNA polymerase II transcription factor activity; go_process: organ morphogenesis; go_process: regulation of transcription; DNA-dependent	one cut domain; family member 2	436	TRUE	18:53252264-53255385
cg02250992	12	123914121	NCBI:RefSeq	36.1	CGGCACCATCACGATCATGACAGCGCCCAGCACAGCGCACAGTAGCCCCG	123914287	-	GeneID:949	SCARB1	CLA1; SRB1; CLA-1; SR-BI; CD36L1; MGC138242;	NM_005505.3	GI:33620766	CD36 antigen-like 1; CD36 antigen (collagen type I receptor; thrombospondin receptor)-like 1; scavenger receptor class B type III; scavenger receptor class B type 1; go_component: membrane fraction; go_component: plasma membrane; go_component: integral to membrane; go_function: protein binding; go_function: receptor activity; go_function: transporter activity; go_process: apoptosis; go_process: c…	scavenger receptor class B; member 1	166	TRUE	12:123913607-123914710
cg02254649	1	223906732	NCBI:RefSeq	36.1	TCAAATGCTCTTCTTTCACCCAGGATTTCCCTTCCTAAATTTAATTTGCG	223907468	-	GeneID:55740	ENAH	MENA; NDPP1;	NM_018212.4	GI:56549692	isoform b is encoded by transcript variant 2; go_process: cell differentiation; go_process: nervous system development	enabled homolog isoform b	736	TRUE	1:223906627-223908504
cg02265318	1	219027162	NCBI:RefSeq	36.1	CGCAGCCCCATGGCCGTGCACTCCGCCTCGCTCACCGGCACCCCCTTGCA	219026894	+	GeneID:64757	MOSC1	FLJ22390; RP11-295M18.1;	NM_022746.2	GI:33285009	synonyms: FLJ22390; RP11-295M18.1	MOCO sulphurase C-terminal domain containing 1	268	TRUE	1:219026539-219027362
cg02268424	19	12135129	NCBI:RefSeq	36.1	CTGAGGCCGAGGGTACCAAGGGCTGAGCTGCGCCAGAGGGACTCGGTACG	12134919	+	GeneID:7695	ZNF136	pHZ-20;	NM_003437.2	GI:37594440	go_component: nucleus; go_function: DNA binding; go_function: zinc ion binding; go_function: metal ion binding; go_function: nucleic acid binding; go_function: transcription corepressor activity; go_function: specific RNA polymerase II transcription factor activity; go_process: transcription; go_process: regulation of transcription; DNA-dependent; go_process: negative regulation of transcription …	zinc finger protein 136 (clone pHZ-20)	210	TRUE	19:12134637-12135432
cg02273392	7	100557134	NCBI:RefSeq	36.1	CAGTGGCCCACAGAGGAGCACAGCTGTGTTTGGCTGCAGGGCCAAGAGCG	100557172	+	GeneID:5054	SERPINE1	PAI; PAI1; PAI-1; PLANH1;	NM_000602.1	GI:10835158	plasminogen activator inhibitor; type I; serine (or cysteine) proteinase inhibitor; clade E (nexin; plasminogen activator inhibitor type 1); member 1; go_component: extracellular region; go_function: plasminogen activator activity; go_function: serine-type endopeptidase inhibitor activity; go_process: blood coagulation	plasminogen activator inhibitor-1	38	FALSE
cg02275359	19	41411559	NCBI:RefSeq	36.1	GACTCAATGCTGACTGAAAAACTGTGGCCTGCCTGTCATTTACTCACCCG	41411488	+	GeneID:7705	ZNF146	OZF;	NM_007145.1	GI:6005965	go_component: nucleus; go_function: DNA binding; go_function: metal ion binding; go_function: heparin binding; go_function: zinc ion binding; go_process: regulation of transcription; DNA-dependent	zinc finger protein 146	71	FALSE
cg02275830	14	73388527	NCBI:RefSeq	36.1	CTGCTTCTGTTTCTCGAGCATTCCCTATCTCAGTGTTGCGGGCAATAACG	73388424	+	GeneID:145482	ZADH1	FLJ39091; DKFZp686P10120;	NM_152444.1	GI:22748928	go_component: cytoplasm; go_function: zinc ion binding; go_function: oxidoreductase activity	zinc binding alcohol dehydrogenase; domain containing 1	103	TRUE	14:73388078-73389160
cg02276665	5	138116341	NCBI:RefSeq	36.1	CGGGTTAGGTGAATTCTAGGGGCGCTTCCACCTCACATTATGAAAGGTCC	138117006	+	GeneID:1495	CTNNA1	CAP102; FLJ36832;	NM_001903.2	GI:55770843	catenin (cadherin-associated protein); alpha 1 (102kD); cadherin-associated protein;102kDa; alpha-E-catenin; alphaE-catenin; alpha-catenin; go_component: actin cytoskeleton; go_function: cadherin binding; go_function: protein binding; go_function: vinculin binding; go_function: structural molecule activity; go_process: cell adhesion; go_process: cell adhesion; go_process: apical junction assembly	catenin; alpha 1	665	TRUE	5:138116189-138117849
cg02278071	22	29393986	NCBI:RefSeq	36.1	CGGCTCTCAACCGGCCTCCTGGCGCCCAACGACCATGGCTTCCAACCGGC	29393872	-	GeneID:150290	DUSP18	DUSP20; LMWDSP20; MGC32658; bK963H5.1;	NM_152511.3	GI:51093844	low molecular weight dual specificity phosphatase 20; go_component: nucleus; go_function: hydrolase activity; go_function: protein tyrosine/serine/threonine phosphatase activity; go_process: protein amino acid dephosphorylation	dual specificity phosphatase 18	114	TRUE	22:29393262-29394461
cg02284889	11	73559924	NCBI:RefSeq	36.1	CATACTCTGTTACCCAGCTTCCTTTGTATGAGTGCTGTTGCGCACTTCCG	73560016	+	GeneID:51400	PPME1	PME-1;	NM_016147.1	GI:7706644	go_function: hydrolase activity; go_function: serine esterase activity; go_function: protein phosphatase inhibitor activity; go_process: aromatic compound metabolism; go_process: protein amino acid demethylation	protein phosphatase methylesterase-1	92	TRUE	11:73559258-73560445
cg02285477	13	27094059	NCBI:RefSeq	36.1	TTCTGGATCCTCAGGTGGTGCTGGCGGATCGGGGGCTCTGTCCCATAGCG	27094003	+	GeneID:219404	MGC9850	POLR1C;	NM_152705.1	GI:22749406	Polymerase (RNA) I polypeptide C	hypothetical protein MGC9850	56	TRUE	13:27092036-27094375
cg02288165	20	3635992	NCBI:RefSeq	36.1	GGCAGGCCACCAAGTGAGGGCATTCCTGGGCACAGCCTGAGCTGGGAACG	3635775	-	GeneID:6614	SN	CD169; FLJ00051; FLJ00055; FLJ00073; FLJ32150; SIGLEC-1; dJ1009E24.1;	NM_023068.2	GI:18765743	sialic acid-binding immunoglobulin-like lectin 1; go_component: integral to membrane; go_function: protein binding; go_function: sugar binding; go_process: cell-cell adhesion; go_process: cell-matrix adhesion; go_process: inflammatory response	sialoadhesin precursor	217	FALSE
cg02293044	22	28033543	NCBI:RefSeq	36.1	TGTGCCGTCATTAACGACATAGCAGCAGCAATAGTGTAACAGCACGACCG	28032997	+	GeneID:10634	GAS2L1	GAR22; MGC17243;	NM_006478.3	GI:23065523	isoform a is encoded by transcript variant 1; GAS2-related protein on chromosome 22; go_component: cytoskeleton; go_process: cell cycle arrest	growth arrest-specific 2 like 1 isoform a	546	TRUE	22:28032186-28033724
cg02296128	13	44592882	NCBI:RefSeq	36.1	ACACAGGAGTGTGGCTAGTCAAGGTAATGTTCGCGAGTCTCCCACTTGCG	44592672	+	GeneID:2963	GTF2F2	BTF4; RAP30; TFIIF;	NM_004128.1	GI:4758487	synonyms: BTF4; RAP30; TFIIF	general transcription factor IIF; polypeptide 2 (30kD subunit)	210	TRUE	13:44592429-44593000
cg02299653	7	32496497	NCBI:RefSeq	36.1	GCGATTACCTAAGGGCAGCAGCTGCGACGGGTTGGTAGTAGCGTTAGCCG	32496502	-	GeneID:23658	LSM5	YER146W; FLJ12710;	NM_012322.1	GI:6912487	U6 snRNA-associated Sm-like protein; go_component: nucleus; go_component: small nucleolar ribonucleoprotein complex; go_function: RNA binding; go_function: protein binding; go_process: nuclear mRNA splicing; via spliceosome	U6 snRNA-associated Sm-like protein 5	5	TRUE	7:32496084-32496773
cg02300906	11	22604062	NCBI:RefSeq	36.1	CGCTGGGAGATTGACATGCATTTCGACCAATAGCATTGCAGAGAGGCGTA	22603963	-	GeneID:2188	FANCF	FAF;	NM_022725.2	GI:42716285	go_component: nucleus; go_function: protein binding; go_process: DNA repair	Fanconi anemia; complementation group F	99	TRUE	11:22603124-22604113
cg02309273	1	38185331	NCBI:RefSeq	36.1	CGCCACATGGTGGTCAGTCAGCCTGCAAGTCCCAGCATGCCCGAGTCAAT	38185280	-	GeneID:3633	INPP5B	MGC65156; MGC71303;	NM_005540.1	GI:52138518	go_component: integral to membrane; go_function: hydrolase activity; go_function: phosphoinositide 5-phosphatase activity; go_function: inositol-polyphosphate 5-phosphatase activity; go_function: inositol-polyphosphate 5-phosphatase activity; go_process: biological process unknown	inositol polyphosphate-5-phosphatase; 75kDa	51	FALSE
cg02311163	20	43283925	NCBI:RefSeq	36.1	CGGGTCCAGTCATGATCATTGATGTCTACATGATATGTGTGTTGAATAGA	43283424	+	GeneID:6407	SEMG2	SGII;	NM_003008.2	GI:38049015	go_component: secretory granule; go_component: extracellular space; go_function: structural molecule activity; go_process: sexual reproduction	semenogelin II precursor	501	FALSE
cg02316718	12	123965362	NCBI:RefSeq	36.1	CGGCCCGCTGCTCATAAGACTCGGCCTTAGAACCCCAGTATCAGCAGAAG	123965360	-	GeneID:7316	UBC	HMG20;	NM_021009.3	GI:67191207	go_process: protein modification	ubiquitin C	2	TRUE	12:123964354-123966007
cg02321871	13	49057139	NCBI:RefSeq	36.1	CGGTTTGTGACAGCACTACTCTCAGGAGACGAAGGAGAGATGCTAAGATC	49057720	-	GeneID:55213	RCBTB1	GLP; CLLD7; CLLL7; MGC33184; RP11-185C18.1;	NM_018191.3	GI:57242758	GDP/GTP exchange factor (GEF)-like protein; chronic lymphocytic leukemia deletion region gene 7; regulator of chromosome condensation (RCC1) and BTB (POZ) domain containing protein 1 variant; go_function: protein binding	regulator of chromosome condensation (RCC1) and BTB (POZ) domain containing protein 1	581	TRUE	13:49057134-49058131
cg02324920	10	105243142	NCBI:RefSeq	36.1	GAGGGTCAAGTGCCGGGGTTCTAATCTCAATTACTTTATCCAAGCATCCG	105244038	+	GeneID:9148	NEURL	RNF67; h-neu; NEURL1;	NM_004210.3	GI:21314780	bA416N2.1 (neuralized (Drosophila)-like); go_component: ubiquitin ligase complex; go_function: zinc ion binding; go_function: metal ion binding; go_function: ubiquitin-protein ligase activity; go_process: protein ubiquitination; go_process: nervous system development	neuralized-like	896	TRUE	10:105243045-105244443
cg02326931	13	36470901	NCBI:RefSeq	36.1	CGGCAGCCATCTGTTACAAATGGGAATAAATGCGTGGATCGATGAGACCC	36471477	-	GeneID:29880	ALG5	bA421P11.2; RP11-421P11.2;	NM_013338.3	GI:38176301	Alg5; S. cerevisiae; homolog of; go_component: integral to membrane; go_component: endoplasmic reticulum; go_function: transferase activity; go_function: oligosaccharyl transferase activity; go_function: transferase activity; transferring glycosyl groups; go_function: dolichyl-phosphate beta-glucosyltransferase activity; go_process: protein amino acid glycosylation	dolichyl phosphate glucosyltransferase	576	TRUE	13:36470672-36471745
cg02327719	1	26057973	NCBI:RefSeq	36.1	AATTGGGTGGAAACAGACCCCGGGGTGAGAATTTCCCCAATTTGCATTCG	26058435	-	GeneID:79000	C1orf135	MGC2603; FLJ14264;	NM_024037.1	GI:13128989	synonyms: MGC2603; FLJ14264	hypothetical protein LOC79000	462	TRUE	1:26057917-26058914
cg02330106	10	131154830	NCBI:RefSeq	36.1	CGGCATCGCCCACCACAGGCCCTGGAGGCTGCCCCCACGGCCCCCTGACA	131155456	+	GeneID:4255	MGMT	9606;	NM_002412.2	GI:49574515	Methylguanine-DNA methyltransferase; O6-methylguanine-DNA methyltransferase; go_component: nucleus; go_function: DNA binding; go_function: transferase activity; go_function: DNA-methyltransferase activity; go_function: methylated-DNA-[protein]-cysteine S-methyltransferase activity; go_process: DNA repair; go_process: DNA ligation	O-6-methylguanine-DNA methyltransferase	626	TRUE	10:131154808-131155770
cg02331561	16	2331082	NCBI:RefSeq	36.1	ACGGCCAAAGTCGAGTTTCCGGGTGTGAAGACTTCCACTGCTGCGAAACG	2330595	-	GeneID:21	ABCA3	ABC3; ABC-C; LBM180; MGC72201; EST111653;	NM_001089.1	GI:4501848	ABC transporter 3; ATP-binding cassette 3; go_component: lamellar body; go_component: plasma membrane; go_component: membrane fraction; go_component: integral to membrane; go_function: ATP binding; go_function: ATP binding; go_function: ATPase activity; go_function: nucleotide binding; go_function: transporter activity; go_function: ATPase activity; coupled to transmembrane movement of substances…	ATP-binding cassette; sub-family A member 3	487	TRUE	16:2329513-2332346
cg02334775	15	86983680	NCBI:RefSeq	36.1	CGAGCCAGGCCACTCTCCCGGTGGGGCCCCAGCCCCACCATCTCGCAGTC	86983043	+	GeneID:3669	ISG20	CD25; HEM45;	NM_002201.4	GI:34147571	interferon stimulated gene (20kD); interferon stimulated gene 20kDa variant; go_component: nucleus; go_component: PML body; go_component: intracellular; go_component: nucleoplasm; go_function: RNA binding; go_function: metal ion binding; go_function: hydrolase activity; go_function: exonuclease activity; go_function: manganese ion binding; go_function: exoribonuclease II activity; go_function: 3p…	interferon stimulated gene 20kDa	637	TRUE	15:86983615-86983821
cg02337447	17	10542757	NCBI:RefSeq	36.1	GTTCTCTAACCCAGTAACGGAACATAGTGTTACCTGTGTTTCTTGATTCG	10541562	-	GeneID:6341	SCO1	SCOD1;	NM_004589.1	GI:4759067	SCO (cytochrome oxidase deficient; yeast) homolog 1; go_component: mitochondrion; go_function: metal ion binding; go_function: copper ion binding; go_function: unfolded protein binding; go_process: protein folding; go_process: electron transport; go_process: cytochrome c oxidase complex assembly	cytochrome oxidase deficient homolog 1	1195	FALSE
cg02347114	2	99238101	NCBI:RefSeq	36.1	CGCTGATGTCTACTCTGTTGAAGCCAGGTGCGCAGTGATCTACTGACTAA	99238002	-	GeneID:254773	LYG2	LYGH;	NM_175735.3	GI:31652254	go_function: lysozyme activity; go_process: cell wall catabolism; go_process: peptidoglycan catabolism	lysozyme-like	99	FALSE
cg02347487	11	7015679	NCBI:RefSeq	36.1	CGTGAGATGAGGATGTTTTTGATGCACTTTAACACTGAACTCACCCAGAC	7016373	+	GeneID:338323	NALP14	NOD5; GC-LRR;	NM_176822.2	GI:31543282	nucleotide-binding oligomerization domain protein 5; go_function: ATP binding; go_function: nucleotide binding	NACHT; LRR and PYD containing protein 14	694	FALSE
cg02357714	5	176869169	NCBI:RefSeq	36.1	CGGCCCTGCTCCTGGCCGTGACCATGGACCCTCTGGAGACCCCTATCAAG	176869459	-	GeneID:79930	DOK3	FLJ22570; FLJ39939;	NM_024872.1	GI:13376307	Dok-like protein	docking protein 3	290	FALSE
cg02358761	2	196745025	NCBI:RefSeq	36.1	GGAACCTCTGCCAAGTTGTAGCAAACTGGGTTCTCCACTTACAGGGTACG	196744520	-	GeneID:9262	STK17B	DRAK2;	NM_004226.2	GI:31543661	death-associated protein kinase-related 2; go_component: nucleus; go_function: ATP binding; go_function: nucleotide binding; go_function: transferase activity; go_function: protein-tyrosine kinase activity; go_function: protein serine/threonine kinase activity; go_process: apoptosis; go_process: induction of apoptosis; go_process: protein kinase cascade; go_process: protein amino acid phosphoryla…	serine/threonine kinase 17b (apoptosis-inducing)	505	TRUE	2:196743664-196745220
cg02360836	17	59273920	NCBI:RefSeq	36.1	GGTTCCGGGATTTGTCGATCCGGGCTCCGGGATTTCCTAATCCAAGTTCG	59274083	-	GeneID:6603	SMARCD2	Rsc6p; BAF60B; CRACD2; PRO2451;	NM_003077.2	GI:21264350	mammalian chromatin remodeling complex BRG1-associated factor 60B; Swp73-like protein; chromatin remodeling complex BAF60B subunit; SWI/SNF complex 60 kDa subunit B; go_component: nucleoplasm; go_function: protein binding; go_function: transcription coactivator activity; go_process: transcription; go_process: chromatin remodeling; go_process: regulation of transcription from RNA polymerase II pro…	SWI/SNF-related matrix-associated actin-dependent regulator of chromatin d2	163	TRUE	17:59273201-59274776
cg02361363	1	43946165	NCBI:RefSeq	36.1	CGGCCCCCACCCAGGAGAGGTCATCCAGGTACTGGGCCCCCAGCCCGAAG	43945805	+	GeneID:6487	ST3GAL3	ST3N; SIAT6; ST3GALII; ST3GalIII; ST3Gal III;	NM_006279.2	GI:28373066	isoform j is encoded by transcript variant 10; Gal beta-1;3(4)GlcNAc alpha-2;3 sialyltransferase; CMP-N-acetylneuraminate-beta-1;4-galactoside alpha-2;3-sialyltransferase; alpha-2;3-sialyltransferase II; alpha 2;3-sialyltransferase III; sialyltransferase 6 (N-acetyllacosaminide alpha 2;3-sialyltransferase); go_component: membrane; go_component: Golgi stack; go_component: integral to membrane; go_…	sialyltransferase 6 isoform j	360	TRUE	1:43945075-43946525
cg02364038	19	748109	NCBI:RefSeq	36.1	GTCAGCTGGCGCGTGGCTTTGCGGGAGACGCCATCTTGAGAGTGGGTACG	748411	+	GeneID:5725	PTBP1	PTB; PTB2; PTB3; PTB4; pPTB; HNRPI; PTB-1; PTB-T; HNRNPI; MGC8461; MGC10830;	NM_002819.3	GI:28558994	isoform a is encoded by transcript variant 1; polypyrimidine tract binding protein (heterogeneous nuclear ribonucleoprotein I); heterogeneous nuclear ribonucleoprotein polypeptide I; RNA-binding protein; go_component: nucleus; go_component: nucleolus; go_component: nucleoplasm; go_component: heterogeneous nuclear ribonucleoprotein complex; go_function: RNA binding; go_function: nucleotide binding…	polypyrimidine tract-binding protein 1 isoform a	302	TRUE	19:747475-750014
cg02367472	5	159778476	NCBI:RefSeq	36.1	CGGGGGACCGAAAAGCCACTGTCCTGAGACCCATTCATGGCACTCGTGCC	159778672	-	GeneID:10569	SLU7	hSlu7; MGC9280;	NM_006425.3	GI:27477110	splicing factor; go_component: nucleus; go_function: nucleic acid binding; go_process: mRNA processing; go_process: mRNA splice site selection	step II splicing factor SLU7	196	TRUE	5:159778220-159778952
cg02381948	10	131245102	NCBI:RefSeq	36.1	CGACAGAACAGAAACAAGTTGTGAAAAAGTGATTTGGGACTAACATTGCT		+	GeneID:4255	MGMT	9606;	NT_008818.15	O-6-methylguanine-DNA methyltransferase	Methylguanine-DNA methyltransferase; O6-methylguanine-DNA methyltransferase; go_component: nucleus; go_function: DNA binding; go_function: transferase activity; go_function: DNA-methyltransferase activity; go_function: methylated-DNA-[protein]-cysteine S-methyltransferase activity; go_process: DNA repair; go_process: DNA ligation			TRUE	10:131244704-131245359
cg02382666	7	134113994	NCBI:RefSeq	36.1	TATAGCACACATCCTAACCATGAAGAGTTGGTCGGAGCACTTTCAAGACG	134114711	+	GeneID:800	CALD1	CDM; H-CAD; L-CAD; NAG22; MGC21352;	NM_033138.2	GI:44680104	isoform 1 is encoded by transcript variant 1; go_component: cytoskeleton; go_function: myosin binding; go_function: actin binding; go_function: calmodulin binding; go_function: tropomyosin binding; go_process: cell motility; go_process: muscle contraction	caldesmon 1 isoform 1	717	FALSE
cg02387613	3	134863169	NCBI:RefSeq	36.1	TTTTCCTGTCCTGGTAACTGGCCCTGGAGCCGGCGGGTGGGCCTTTGACG	134863380	-	GeneID:11073	TOPBP1	TOP2BP1;	NM_007027.2	GI:20143948	go_component: nucleus; go_function: DNA binding; go_function: protein C-terminus binding; go_process: DNA repair	topoisomerase (DNA) II binding protein 1	211	TRUE	3:134862968-134863749
cg02387854	17	77442738	NCBI:RefSeq	36.1	CGCCCGCCATGGCCGACAAAATGGACATGTCTCTGGACGACATCATTAAA	77442895	+	GeneID:51529	ANAPC11	APC11; Apc11p; MGC882; HSPC214;	NM_001002249.1	GI:50409749	isoform 2 is encoded by transcript variant 7; anaphase promoting complex subunit 11 (yeast APC11 homolog); go_component: nucleus; go_component: ubiquitin ligase complex; go_component: anaphase-promoting complex; go_function: zinc ion binding; go_function: metal ion binding; go_function: ubiquitin-protein ligase activity; go_process: cell cycle; go_process: mitosis; go_process: cell division; go_p…	APC11 anaphase promoting complex subunit 11 isoform 2	157	TRUE	17:77441671-77443469
cg02397720	2	238177146	NCBI:RefSeq	36.1	ATTCTGCCCTCTGGGTTCTAGATGCTTCCTGACAGTTCCGTTTCTTGACG	238177653	-	GeneID:64284	RAB17	FLJ12538;	NM_022449.1	GI:11967980	go_function: GTP binding; go_function: nucleotide binding; go_process: intracellular protein transport; go_process: small GTPase mediated signal transduction	RAB17; member RAS oncogene family	507	FALSE
cg02398725	11	85053881	NCBI:RefSeq	36.1	ATCACTAGAAAGCTGGAATTATTCCCACTCTAAAGCACCCTGAAATCTCG	85053794	-	GeneID:58487	ZF		NM_021212.1	GI:10864024	bZIP protein; similar to Luman; does not appear to bind to consensus bZIP binding sites by itself; which may be due to its unique basic domain; go_component: nucleus; go_function: DNA binding; go_process: transcription; go_process: response to virus; go_process: regulation of transcription; DNA-dependent	HCF-binding transcription factor Zhangfei	87	TRUE	11:85052396-85054007
cg02403232	12	131915193	NCBI:RefSeq	36.1	AAAGCAAGCACTGCCCGAGTGGTGGCAGTGGACAGCTTCGGGACAGGCCG	131915361	-	GeneID:2802	GOLGA3	MEA-2; GCP170;	NM_005895.2	GI:30089939	SY2/SY10 protein; Golgi complex-associated protein of 170 kD; Golgi peripheral membrane protein; Golgi membrane associated protein; male enhanced antigen-2; golgin-165; golgin-160; go_component: Golgi stack; go_component: Golgi membrane; go_component: Golgi transport complex; go_function: transporter activity; go_process: intra-Golgi transport	Golgi autoantigen; golgin subfamily a; 3	168	TRUE	12:131914616-131916299
cg02404636	22	30221804	NCBI:RefSeq	36.1	CTTTCAAATAAATAACTACTGCTTTTAGTCTCTGCACCAGGAATCTCACG	30222261	+	GeneID:9814	SFI1	PISD; hSfi1p; MGC57874; RP5-858B16.1;	NM_014775.2	GI:55956783	isoform b is encoded by transcript variant 2; homolog of yeast Sfi1	spindle assembly associated Sfi1 homolog isoform b	457	FALSE
cg02409282	6	150326848	NCBI:RefSeq	36.1	GGCAGCTTTATAAACAGCCGTGGTGTGAGCCTCGAAGGGAACCATCAGCG	150326836	+	GeneID:80329	ULBP1	RAET1I;	NM_025218.2	GI:56181385	alcan-beta; go_component: membrane; go_component: endoplasmic reticulum; go_component: MHC class I protein complex; go_function: MHC class I receptor activity; go_process: antigen presentation; go_process: natural killer cell activation	UL16 binding protein 1	12	TRUE	6:150326250-150328321
cg02412050	6	36103407	NCBI:RefSeq	36.1	CAGTCCCTGGGAGTTTCTGCCTTTGGTCTCCAGTTATTGTTCTCTTCTCG	36103551	+	GeneID:1432	MAPK14	RK; p38; EXIP; Mxi2; CSBP1; CSBP2; CSPB1; PRKM14; PRKM15; SAPK2A; p38ALPHA;	NM_139012.1	GI:20986511	isoform 2 is encoded by transcript variant 2; Csaids binding protein; cytokine suppressive anti-inflammatory drug binding protein; MAP kinase Mxi2; p38 mitogen activated protein kinase; p38 MAP kinase; p38alpha Exip; stress-activated protein kinase 2A; MAX-interacting protein 2; go_component: nucleus; go_component: cytoplasm; go_function: ATP binding; go_function: nucleotide binding; go_function:…	mitogen-activated protein kinase 14 isoform 2	144	TRUE	6:36102341-36104616
cg02413850	20	44426642	NCBI:RefSeq	36.1	GGAGAGACGCAGACAATTACACGGCTGTGCTCTGAGCCTGAGGGACTTCG	44426471	-	GeneID:51006	SLC35C2	CGI-15; OVCOV1; C20orf5; FLJ37039; MGC20633; MGC32079; MGC39183; BA394O2.1;	NM_173073.2	GI:34335286	isoform b is encoded by transcript variant 3; ovarian cancer overexpressed 1; go_component: membrane; go_component: integral to membrane; go_process: transport	solute carrier family 35; member C2 isoform b	171	TRUE	20:44425887-44426796
cg02421543	1	93583414	NCBI:RefSeq	36.1	CGCCTAATGGCTAAGTAGGAAAGCAGAAGTCAGTTCCAACATAGTGGAAA	93584066	+	GeneID:1810	DR1	NC2; NC2-BETA;	NM_001938.2	GI:45006969	go_component: nucleus; go_function: DNA binding; go_function: transcription factor binding; go_function: transcription corepressor activity; go_process: transcription; go_process: regulation of transcription; DNA-dependent; go_process: negative regulation of transcription from RNA polymerase II promoter	down-regulator of transcription 1	652	FALSE
cg02422627	8	118602185	NCBI:RefSeq	36.1	TTGGGAGGCTGTGGGGCCTCAGCGTTGGAACCAGCTTGAGAGACCCCCCG	118602211	+	GeneID:90390	THRAP6	MED30; TRAP25; MGC9890;	NM_080651.1	GI:18087810	TRAP/Mediator complex component; go_component: nucleus; go_component: mediator complex; go_function: receptor activity; go_function: vitamin D receptor binding; go_function: transcription cofactor activity; go_function: thyroid hormone receptor binding; go_function: transcriptional activator activity; go_function: RNA polymerase II transcription mediator activity; go_function: ligand-dependent nu…	TRAP/Mediator complex component TRAP25	26	TRUE	8:118601853-118602591
cg02431964	2	119416499	NCBI:RefSeq	36.1	CAATAAGCCAAACCTAGACTTTCTATTGACTTGTCTATTTTCGTATCTCG	119416215	+	GeneID:8685	MARCO	SCARA2;	NM_006770.3	GI:56237031	scavenger receptor class A; member 2; go_component: membrane; go_component: cytoplasm; go_component: integral to plasma membrane; go_function: scavenger receptor activity; go_function: pattern recognition receptor activity; go_process: phosphate transport; go_process: response to pathogenic bacteria; go_process: cell surface receptor linked signal transduction	macrophage receptor with collagenous structure	284	FALSE
cg02432101	18	42811633	NCBI:RefSeq	36.1	AATCTCCTCGGAAAGGCTTGCTCTGGTCTGCAGCTGATATTGGTGCCACG	42810447	-	GeneID:162699	TCEB3C	HsT829; TCEB3L2; MGC119353;	NM_145653.2	GI:62868692	elongin A3; go_component: nucleus; go_component: integral to membrane; go_process: regulation of transcription; DNA-dependent	transcription elongation factor B polypeptide 3C	1186	FALSE
cg02436686	19	44517990	NCBI:RefSeq	36.1	TTCGGAAGCGGAATTTCCTCAGCTTTTCTGTTAGCTCTGGGTCTACCTCG	44518460	-	GeneID:9535	GMFG	GMF-GAMMA;	NM_004877.1	GI:4758439	go_component: intracellular; go_function: actin binding; go_function: growth factor activity; go_function: enzyme activator activity; go_function: protein kinase inhibitor activity; go_process: protein amino acid phosphorylation	glia maturation factor; gamma	470	FALSE
cg02441647	3	100840189	NCBI:RefSeq	36.1	CGTGCTCAAGGTAAGACAGCACTTCTGCAGGCAGCTCACCTACCAGGGGT	100840144	+	GeneID:1295	COL8A1	MGC9568;	NM_020351.2	GI:32895367	collagen VIII; alpha-1 polypeptide; endothelial collagen; smooth muscle cell-expressed and macrophage conditioned medium-induced protein smag-64; go_component: cytoplasm; go_component: collagen type VIII; go_component: extracellular matrix (sensu Metazoa); go_function: protein binding; go_function: structural molecule activity; go_process: cell adhesion; go_process: phosphate transport	alpha 1 type VIII collagen precursor	45	TRUE	3:100840163-100840365
cg02442161	20	43237051	NCBI:RefSeq	36.1	TGGTGGTGTTCCTCATCGCTGGGACGCTGGTTCTAGAGGCAGCTGTCACG	43236912	+	GeneID:5266	PI3	ESI; WAP3; SKALP; WFDC14; MGC13613;	NM_002638.2	GI:31657130	WAP four-disulfide core domain 14; protease inhibitor 3; skin-derived (SKALP); skin-derived antileukoproteinase; elastase-specific inhibitor; go_component: extracellular matrix (sensu Metazoa); go_function: protein binding; go_function: serine-type endopeptidase inhibitor activity; go_process: copulation	elafin preproprotein	139	FALSE
cg02460349	20	17611383	NCBI:RefSeq	36.1	TGGATACCGCTGGGCTGACATGGCGGTGGCTGAACAGGGTTGCGCAACCG	17610721	-	GeneID:6238	RRBP1	hES; ES130; ES/130; DKFZp586A1420;	NM_004587.1	GI:4759055	Ribosome binding protein-1; ribosome binding protein 1 homolog 180kD (dog); ribosome binding protein 1 (dog 180kD homolog); go_component: ribosome; go_component: integral to membrane; go_component: endoplasmic reticulum; go_component: integral to endoplasmic reticulum membrane; go_function: receptor activity; go_function: ribosome receptor activity; go_function: extracellular matrix structural co…	ribosome binding protein 1	662	TRUE	20:17609483-17611631
cg02470959	12	130761989	NCBI:RefSeq	36.1	AAACTCTCTGCAGTCCTTGCAGTCAAGTCAACATCAGACGAGATCAAGCG	130761588	+	GeneID:6433	SFRS8	SWAP;	NM_004592.2	GI:23111061	isoform 1 is encoded by transcript variant 2A; splicing factor; arginine/serine-rich 8 (suppressor-of-white-apricot; Drosophila homolog); go_component: nucleus; go_function: RNA binding; go_process: transcription; go_process: mRNA splice site selection; go_process: nuclear mRNA splicing; via spliceosome; go_process: regulation of transcription; DNA-dependent	splicing factor; arginine/serine-rich 8 isoform 1	401	TRUE	12:130760839-130762701
cg02471507	8	82807302	NCBI:RefSeq	36.1	CGGCCCTCCTGGGAATCAACAAGTCGTCCTGGACAGGTGACACACACTCC	82807243	+	GeneID:92421	CHMP4C	Shax3; MGC22825;	NM_152284.3	GI:62526041	Snf7 homologue associated with Alix 3; go_function: molecular function unknown; go_process: protein transport	chromatin modifying protein 4C	59	TRUE	8:82806968-82807564
cg02477931	11	131037931	NCBI:RefSeq	36.1	GGCTCCCTGTGGACCTCAGAACTTGCCTTGTCAGCTTGGGGCGGGGAACG	131038060	-	GeneID:399980	C11orf39	FLJ45436;	NM_207432.1	GI:46409487	synonym: FLJ45436	hypothetical protein LOC399980	129	FALSE
cg02479196	2	160277294	NCBI:RefSeq	36.1	TTCTAGGCCCGTGACTGAGGAAATGCAGTCGGCAGCGAAGCACAATGGCG	160277256	+	GeneID:64844	2014-03-07	AXO; AXOT; RNF177; MARCH-VII; DKFZP586F1122;	NM_022826.2	GI:53828927	membrane-associated RING-CH protein VII; go_component: ubiquitin ligase complex; go_function: zinc ion binding; go_function: metal ion binding; go_function: ubiquitin-protein ligase activity; go_process: protein ubiquitination	axotrophin	38	TRUE	2:160276726-160278011
cg02486845	6	88468518	NCBI:RefSeq	36.1	CGGTGCTGTTTTCGACTTCAGAAAGGATCTAGTCTCAGCACAGAAGCGCC	88468645	-	GeneID:55122	C6orf166	FLJ10342; dJ486L4.2;	NM_018064.2	GI:39725640	synonyms: FLJ10342; dJ486L4.2	hypothetical protein LOC55122	127	TRUE	6:88467350-88469014
cg02490034	7	129913072	NCBI:RefSeq	36.1	CGGAAGGCTCGCCGAAGATCTCTAGGTAGTTAATAACTATCAAAATGTCA	129913282	+	GeneID:4232	MEST	PEG1; MGC8703; MGC111102; DKFZp686L18234;	NM_177524.1	GI:29294634	isoform b is encoded by transcript variant 2; paternally expressed gene 1; go_function: catalytic activity; go_function: hydrolase activity; go_process: mesoderm development	mesoderm specific transcript isoform b	210	TRUE	7:129912883-129914215
cg02491878	7	138133120	NCBI:RefSeq	36.1	ACAGATCTCTCTTGTCCTCCCCTTGTTTCTCAATAAGGACAATATTTGCG	138133466	-	GeneID:50617	ATP6V0A4	a4; Stv1; VPP2; Vph1; RTA1C; RTADR; ATP6N2; RDRTA2; ATP6N1B; MGC130016; MGC130017;	NM_020632.1	GI:10190665	ATPase; H+ transporting; lysosomal (vacuolar proton pump) non-catalytic accessory protein 1B; renal tubular acidosis; ATPase; H+ transporting; lysosomal (vacuolar proton pump) non-catalytic accessory protein 2 (38kD); vacuolar proton pump 116 kDa accessory subunit; vacuolar proton pump; subunit 2; H(+)-transporting two-sector ATPase; noncatalytic accessory protein 1B; go_component: membrane; go_c…	ATPase; H+ transporting; lysosomal V0 subunit a isoform 4	346	FALSE
cg02493771	21	30666199	NCBI:RefSeq	36.1	TCTATAGGGGCTGTCAGGAGATCTGCTGGGAGCCCACCAGCTGCCAGACG	30666402	-	GeneID:337959	KRTAP13-2	KAP13-2;	NM_181621.2	GI:38569478	go_component: intermediate filament	keratin associated protein 13-2	203	FALSE
cg02496295	4	2815953	NCBI:RefSeq	36.1	CGCATCTGTCGGCTCTCGTATTTAAAAACGACGGCTTCTGCCAAAAGAGA	2815382	+	GeneID:118	ADD1	ADDA; MGC3339; MGC44427;	NM_001119.3	GI:29826318	isoform a is encoded by transcript variant 1; erythrocyte adducin alpha subunit; go_component: membrane; go_component: actin cytoskeleton; go_function: actin binding; go_function: calmodulin binding; go_function: structural constituent of cytoskeleton	adducin 1 (alpha) isoform a	571	TRUE	4:2814911-2816111
cg02500392	6	138581065	NCBI:RefSeq	36.1	CGAAATACCTTGTAGCAGAATGGTAAGAGCACAGTTTCTGGAGCTAGAAT	138581321	-	GeneID:59351	PBOV1	UC28; UROC28; dJ171N11.2;	NM_021635.1	GI:11056009	synonyms: UC28; UROC28; dJ171N11.2	prostate and breast cancer overexpressed 1	256	FALSE
cg02502132	1	53565527	NCBI:RefSeq	36.1	GCGGGGACTCCCTATGGGCTGTATCTGAGCAGATCTCTGACTATGGGTCG	53566409	-	GeneID:7804	LRP8	APOER2; HSZ75190;	NM_017522.3	GI:61744466	isoform 3 precursor is encoded by transcript variant 3; apolipoprotein E receptor 2; go_component: membrane; go_component: plasma membrane; go_component: plasma membrane; go_component: integral to membrane; go_function: receptor activity; go_function: calcium ion binding; go_function: lipoprotein binding; go_function: transmembrane receptor activity; go_function: apolipoprotein E receptor activit…	low density lipoprotein receptor-related protein 8 isoform 3 precursor	882	TRUE	1:53564070-53566625
cg02503850	10	72102558	NCBI:RefSeq	36.1	GCAAAGGCAGCAGGTAGGACAGCAGCGCGCGGAGTGGAGCCATGTGGCCG	72102565	+	GeneID:140766	ADAMTS14	FLJ32820;	NM_080722.2	GI:21265051	isoform 2 preproprotein is encoded by transcript variant 2; metalloprotease-disintegrin protease; a disintegrin-like and metalloprotease (reprolysin type) with thrombospondin type 1 motif; 14; go_component: extracellular matrix; go_component: extracellular matrix (sensu Metazoa); go_function: metal ion binding; go_function: metalloendopeptidase activity; go_process: proteolysis; go_process: colla…	ADAM metallopeptidase with thrombospondin type 1 motif; 14 isoform 2 preproprotein	7	TRUE	10:72101914-72102854
cg02505409	19	8335160	NCBI:RefSeq	36.1	CGTCCCCGAGAGTCCCCGAATCCCCGCTCCCAGGCTACCTAAGAGGATGA	8335011	+	GeneID:51129	ANGPTL4	ARP4; FIAF; PGAR; HFARP; PPARG; pp1158; ANGPTL2;	NM_016109.2	GI:21536395	hepatic angiopoietin-related protein; PPARG angiopoietin related protein; fasting-induced adipose factor; hepatic fibrinogen/angiopoietin-related protein; go_component: extracellular region; go_function: enzyme inhibitor activity; go_process: angiogenesis; go_process: cell differentiation; go_process: response to hypoxia; go_process: cellular response to starvation; go_process: negative regulatio…	angiopoietin-like 4 protein	149	TRUE	19:8334058-8335622
cg02506426	11	76978152	NCBI:RefSeq	36.1	CGGGGAAAGAAAAACTCTAAGGTCCTCGCTGCAAAGCAACCATCAGAGCT	76978328	+	GeneID:282679	AQP11	AQPX1;	NM_173039.1	GI:27370564	go_component: membrane; go_component: integral to membrane; go_function: transporter activity; go_process: transport	aquaporin 11	176	TRUE	11:76977915-76979344
cg02506728	20	57948978	NCBI:RefSeq	36.1	AGGCGCGCAATCCAGGCAGACGTAAACAGAAATTGATCAGACCTGTTTCG	57948747	-	GeneID:5509	PPP1R3D	PPP1R6;	NM_006242.3	GI:37622904	protein phosphatase 1; regulatory subunit 6; spinophilin; go_function: hydrolase activity; go_function: phosphoprotein phosphatase activity; go_function: protein phosphatase type 1 activity; go_process: glycogen metabolism; go_process: carbohydrate metabolism	protein phosphatase 1; regulatory subunit 3D	231	TRUE	20:57947345-57949206
cg02506908	12	120781791	NCBI:RefSeq	36.1	CGGCAGGGAAGAACTGGAACATGAACCGGGCTATTCTAACTCCAGGACCC	120781152	-	GeneID:3242	HPD	PPD;	NM_002150.2	GI:38016938	go_function: iron ion binding; go_function: oxidoreductase activity; go_function: 4-hydroxyphenylpyruvate dioxygenase activity; go_process: tyrosine catabolism; go_process: L-phenylalanine catabolism; go_process: aromatic amino acid family metabolism	4-hydroxyphenylpyruvate dioxygenase	639	FALSE
cg02507952	14	105461686	NCBI:RefSeq	36.1	AATCTATGTGAGCTGTCCTTGTGAAATGGGTGTCACCACATTTCCCCACG	105461657	+	GeneID:9834	KIAA0125		NM_014792.2	GI:20302136		hypothetical protein LOC9834	29	FALSE
cg02511532	8	120914336	NCBI:RefSeq	36.1	CCTATCCTAAATTTTAACAATTCTTTACGATAAGACACATGCGAAGATCG	120914255	-	GeneID:6873	TAF2	TAF2B; CIF150; TAFII150;	NM_003184.2	GI:20357590	TAF2 RNA polymerase II; TATA box binding protein (TBP)-associated factor; 150 kD; TATA box binding protein (TBP)-associated factor; RNA polymerase II; B; 150kD; cofactor of initiator function; 150kD subunit; go_component: transcription factor TFIID complex; go_function: binding; go_function: RNA polymerase II transcription factor activity; go_process: transcription initiation from RNA polymerase …	TBP-associated factor 2	81	TRUE	8:120913892-120914398
cg02513045	21	44583930	NCBI:RefSeq	36.1	CGCCCATGCCATCCACGCTAGGCCTGCGCTCAGAGTCAGGCCTAGGCACT	44583574	-	GeneID:755	C21orf2	A2; YF5;	NM_004928.1	GI:4826650	nuclear encoded mitochondrial protein; cDNA A2-YF5; go_component: cellular component unknown; go_function: molecular function unknown; go_process: biological process unknown	chromosome 21 open reading frame 2	356	TRUE	21:44582884-44584069
cg02518671	19	4133691	NCBI:RefSeq	36.1	CACCTGCATGCAAAGAGGCAGGCTTCCTTCTGACAGCAGATAACATGTCG	4133596	-	GeneID:51548	SIRT6	SIR2L6;	NM_016539.1	GI:7706709	sirtuin (silent mating type information regulation 2; S. cerevisiae; homolog) 6; sir2-related protein type 6; sirtuin type 6; go_component: nucleus; go_component: chromatin silencing complex; go_function: DNA binding; go_function: zinc ion binding; go_function: metal ion binding; go_function: transferase activity; transferring glycosyl groups; go_function: NAD(P)+-protein-arginine ADP-ribosyltran…	sirtuin 6	95	TRUE	19:4133116-4134297
cg02523400	22	19458191	NCBI:RefSeq	36.1	CGGTTACTGTGTTAGCATGCACACATAGCCTTGGTGCAGGAGCAGCCCCT	19458383	+	GeneID:3053	SERPIND1	HC2; LS2; HCF2; HCII; HLS2; D22S673;	NM_000185.3	GI:73858565	serine (or cysteine) proteinase inhibitor; clade D (heparin cofactor); member 1; leuserpin 2; go_component: extracellular space; go_function: heparin binding; go_function: serine-type endopeptidase inhibitor activity; go_process: chemotaxis; go_process: blood coagulation; go_process: sensory perception	heparin cofactor II precursor	192	FALSE
cg02527529	17	39575205	NCBI:RefSeq	36.1	GTTCGGCGGAGTCGGGAGACCTGGGCTGTCGTCAGGGCTTGTCATGGACG	39574852	+	GeneID:78995	C17orf53	MGC3130; FLJ11594;	NM_024032.2	GI:31543178	synonyms: MGC3130; FLJ11594	hypothetical protein LOC78995	353	TRUE	17:39574334-39575559
cg02528468	3	183993595	NCBI:RefSeq	36.1	TACCTCCTGTTGCAGGTCTTTTTCGGGCTCTGTGGCTTCTTTGGTTCACG	183993985	+	GeneID:23200	ATP11B	ATPIF; ATPIR; KIAA0956; MGC46576; DKFZP434J238; DKFZP434N1615;	NM_014616.1	GI:62632749	go_component: membrane; go_component: integral to membrane; go_component: nuclear inner membrane; go_function: ATP binding; go_function: ATPase activity; go_function: hydrolase activity; go_function: nucleotide binding; go_function: magnesium ion binding; go_function: ion transporter activity; go_function: phospholipid-translocating ATPase activity; go_function: ATPase activity; coupled to transm…	ATPase; Class VI; type 11B	390	TRUE	3:183993420-183995035
cg02532648	21	17906641	NCBI:RefSeq	36.1	CGCCGCCTCAGGGCTCCTGCCACGTTTCCCACAGCGCGTTACATTCCGCC	17907033	-	GeneID:10950	BTG3	ANA; TOB5; TOFA; TOB55; MGC8928;	NM_006806.3	GI:28872721	abundant in neuroepithelium area; go_process: negative regulation of cell proliferation; go_process: regulation of progression through cell cycle	B-cell translocation gene 3	392	TRUE	21:17905716-17907712
cg02547439	20	44468580	NCBI:RefSeq	36.1	CGCCCCTCACTCACCAGGGCGCAGACCTAGGCCCAGCTCCTGCTCCCGGG	44468678	-	GeneID:63916	ELMO2	CED12; ELMO-2; FLJ11656; KIAA1834;	NM_022086.6	GI:33469944	PH domain protein CED12A; ced-12 homolog 2; go_component: membrane; go_component: cytoskeleton; go_function: binding; go_process: apoptosis; go_process: phagocytosis	engulfment and cell motility 2	98	TRUE	20:44467473-44468925
cg02549910	2	178191847	NCBI:RefSeq	36.1	CGCTGCAGTCCAGAATATTTGAAGATCAAACCGAACTTGAGAGACTAACG	178191940	-	GeneID:92104	FLJ13946		NM_152275.2	GI:38683852	go_function: binding	hypothetical protein LOC92104	93	TRUE	2:178191292-178192213
cg02552945	9	122851435	NCBI:RefSeq	36.1	CGAGCAGCTAAGGCTTAGAGAGACTGAAATTAAGTGACTTCAAATTGGTG	122852375	-	GeneID:727	C5	CPAMD4;	NM_001735.2	GI:38016946	anaphylatoxin C5a analog; go_component: extracellular space; go_component: membrane attack complex; go_function: receptor binding; go_function: receptor binding; go_function: chemokine activity; go_function: endopeptidase inhibitor activity; go_process: cytolysis; go_process: chemotaxis; go_process: response to stress; go_process: inflammatory response; go_process: activation of MAPK activity; go…	complement component 5	940	FALSE
cg02555579	22	16423043	NCBI:RefSeq	36.1	GGGATTGCAGCACACAATAGCCAAATCTGGGGATTTTCCAGATGCCTTCG	16423183	+	GeneID:83733	SLC25A18	GC2;	NM_031481.1	GI:13899341	mitochondrial glutamate carrier 2; go_component: mitochondrion; go_component: integral to membrane; go_component: mitochondrial inner membrane; go_function: binding; go_function: symporter activity; go_process: transport	solute carrier	140	FALSE
cg02567144	6	52393108	NCBI:RefSeq	36.1	TGTTTAGCGTTACCATGGATCCTGGAGGTGCCCGCGAACACTGCTTGTCG	52393071	+	GeneID:114327	EFHC1	EJM1; FLJ10466; dJ304B14.2;	NM_018100.1	GI:8922435	EF-hand domain containing 1; go_component: myosin; go_function: motor activity; go_function: calcium ion binding; go_process: muscle development	EF-hand domain (C-terminal) containing 1	37	TRUE	6:52392631-52393869
cg02580606	17	36780252	NCBI:RefSeq	36.1	GCACAGTGGAGGCTCAGCAAGCAGGACCCATCACCAATGACAGAGTCACG	36779573	-	GeneID:3884	KRTHA3B	HA3II; Ha-3II; KRTHA3A; hHa3-II;	NM_002279.3	GI:15022816	keratin; hair; acidic;3B; hard keratin; type I; 3II; go_component: intermediate filament; go_function: structural molecule activity	type I hair keratin 3B	679	FALSE
cg02590345	9	102830780	NCBI:RefSeq	36.1	CTGCTCTGTCTGGGCTCTGGAGCCAGAGCTGAGTCTCTCTTGAGCATGCG	102830852	+	GeneID:54886	PRG-3	MGC26189;	NM_017753.2	GI:46877063	lipid phosphate phosphatase-related protein type 1; RP11-35N6.1; go_component: integral to membrane; go_function: hydrolase activity	plasticity related gene 3	72	TRUE	9:102830251-102832386
cg02592124	2	202811724	NCBI:RefSeq	36.1	ACATGGAGCCAGGACCTTTGCTCCTGGGGGATGGCCCTAGTACTGATGCG	202811567	-	GeneID:7341	SUMO1	GMP1; PIC1; SMT3; UBL1; SENP2; SMT3C; SMT3H3; SUMO-1;	NM_003352.4	GI:54792063	isoform a precursor is encoded by transcript variant 1; ubiquitin-like 1 (sentrin); GAP modifying protein 1; go_component: nucleus; go_function: protein binding; go_process: ubiquitin cycle; go_process: protein modification; go_process: protein sumoylation; go_process: negative regulation of transcription	small ubiquitin-like modifier 1 isoform a precursor	157	TRUE	2:202810699-202811877
cg02593766	17	45963676	NCBI:RefSeq	36.1	CGGGACAACATCACAGGCAGAGTTTACTCTGTGGGAAGCACCTATATATG	45965098	+	GeneID:55040	EPN3	FLJ20778;	NM_017957.1	GI:8923677	go_function: lipid binding	epsin 3	1422	FALSE
cg02600430	13	99421943	NCBI:RefSeq	36.1	CGCCCAATACATACATGTTTTTGAAGGCGGGCAGAGGGAATAAAGTCCCC	99422179	-	GeneID:85416	ZIC5		NM_033132.2	GI:22547202	zinc family member 5 protein; go_component: nucleus; go_function: DNA binding; go_function: zinc ion binding; go_function: metal ion binding	zinc finger protein of the cerebellum 5	236	TRUE	13:99418103-99422494
cg02608019	9	92603849	NCBI:RefSeq	36.1	GTCAGCAGGGCGGGCCAGGGCGGCGGGGCGCGACACTGGGAGGAAGTGCG		+	GeneID:6850	SYK	9606;	NT_008470.18	spleen tyrosine kinase	go_component: cytoplasm; go_component: T cell receptor complex; go_function: ATP binding; go_function: nucleotide binding; go_function: protein binding; go_function: protein binding; go_function: protein binding; go_function: integrin binding; go_function: transferase activity; go_function: non-membrane spanning protein tyrosine kinase activity; go_process: cell proliferation; go_process: leukocy…			TRUE	9:92603527-92604494
cg02612026	1	15723043	NCBI:RefSeq	36.1	CGGAGCCAAAGAATCCCAAACACCTCTTAGTCGGGTGTTCGCTAAAGCGA	15723377	-	GeneID:842	CASP9	MCH6; APAF3; APAF-3; ICE-LAP6; CASPASE-9c;	NM_001229.2	GI:14790123	isoform alpha preproprotein is encoded by transcript variant alpha; caspase 9; apoptosis-related cysteine protease; apoptotic protease MCH-6; apoptotic protease activating factor 3; ICE-like apoptotic protease 6; caspase-9c protein; go_component: intracellular; go_function: protein binding; go_function: caspase activity; go_function: peptidase activity; go_function: protein binding; go_function: …	caspase 9 isoform alpha preproprotein	334	TRUE	1:15722905-15724492
cg02614187	1	117465612	NCBI:RefSeq	36.1	CTTTGTTGGCAGCAGGACTAGCTGGAGAGCTAGACCTGGAAGCGCATCCG	117465934	-	GeneID:80263	TRIM45	RNF99; FLJ13181;	NM_025188.2	GI:50878292	go_component: nucleus; go_component: intracellular; go_component: ubiquitin ligase complex; go_component: proton-transporting two-sector ATPase complex; go_function: zinc ion binding; go_function: metal ion binding; go_function: ubiquitin-protein ligase activity; go_function: hydrogen-transporting ATPase activity; rotational mechanism; go_function: hydrogen-transporting ATP synthase activity; rot…	tripartite motif-containing 45	322	TRUE	1:117465566-117466946
cg02617361	8	43030465	NCBI:RefSeq	36.1	CGGCGGACGCAGCCAGCACCCGCAGCCAGCACCCGCACACTCCCACCCAT	43030599	+	GeneID:2339	FNTA	FPTA; PGGT1A; MGC99680;	NM_002027.2	GI:66882377	isoform a is encoded by transcript variant 1; farnesyltransferase alpha-subunit; ras proteins prenyltransferase alpha; FTase-alpha; type I protein geranyl-geranyltransferase alpha subunit; GGTase-I-alpha; go_component: cytoplasm; go_function: transferase activity; go_function: protein prenyltransferase activity; go_function: protein farnesyltransferase activity; go_function: CAAX-protein geranylg…	farnesyltransferase; CAAX box; alpha isoform a	134	TRUE	8:43030020-43031338
cg02620769	12	47584337	NCBI:RefSeq	36.1	TCTGGAAGTCCCCTTTCTAGGGACATTTTTCTTCTAAGCTCTGTAACGCG	47584197	+	GeneID:85478	CCDC65	FLJ25663; FLJ35732; NYD-SP28;	NM_033124.2	GI:24475729	higher level expression in adult testis vs. embryo testis; NYD-SP28 protein	hypothetical protein LOC85478	140	TRUE	12:47583729-47584457
cg02624705	18	48122676	NCBI:RefSeq	36.1	ACCAGCGGCTAAGCGCGGGGATGCGGGTACGCGCTCATCACAGGACAGCG		+	GeneID:1630	DCC	CRC18; CRCR1;	NT_010966.13	deleted in colorectal carcinoma	deleted in colorectal cancer protein; go_component: integral to plasma membrane; go_function: protein binding; go_function: transmembrane receptor activity; go_process: apoptosis; go_process: cell cycle; go_process: development; go_process: axonogenesis; go_process: induction of apoptosis; go_process: negative regulation of progression through cell cycle			TRUE	18:48122009-48122893
cg02626929	16	2951662	NCBI:RefSeq	36.1	CGGCCACCCTGCACCGCCTTAAGAAGGGCAGGGCTGAGCCTGCTCCTCCC	2951591	+	GeneID:124222	PAQR4	FLJ30002;	NM_152341.2	GI:31542755	go_component: integral to membrane; go_function: receptor activity	progestin and adipoQ receptor family member IV	71	FALSE
cg02626977	14	53933300	NCBI:RefSeq	36.1	AGACTCGGCCTCTAATCGCTGACTGGTTCCTAGAAGACCTTTGAAAGACG	53933476	+	GeneID:1033	CDKN3	KAP; CDI1; CIP2; KAP1; FLJ25787; MGC70625;	NM_005192.2	GI:17981703	cyclin-dependent kinase interactor 1; cyclin-dependent kinase interacting protein 2; CDK2-associated dual specificity phosphatase; kinase-associated phosphatase; Cdk-associated protein phosphatase; go_function: hydrolase activity; go_function: protein tyrosine phosphatase activity; go_function: protein tyrosine/serine/threonine phosphatase activity; go_process: cell cycle; go_process: cell cycle …	cyclin-dependent kinase inhibitor 3	176	TRUE	14:53932760-53934678
cg02629257	17	19212220	NCBI:RefSeq	36.1	CGGTTTAGAAAGGCCAGGGATTCCCGCAGCCCTTCAAATGACTTAACAGG	19211551	-	GeneID:27077	EPPB9	B9;	NM_015681.2	GI:22907022	likely ortholog of mouse endothelial precursor protein B9; go_function: protein binding	B9 protein	669	FALSE
cg02630105	3	53170703	NCBI:RefSeq	36.1	CGGGCAGACAGAAGGACCTCAGCCCCCACTGTCTAGCGGAGGGACACACA	53170263	+	GeneID:5580	PRKCD	MAY1; MGC49908; nPKC-delta;	NM_006254.3	GI:47157323	go_component: cytoplasm; go_component: membrane; go_function: ATP binding; go_function: zinc ion binding; go_function: metal ion binding; go_function: nucleotide binding; go_function: protein binding; go_function: transferase activity; go_function: diacylglycerol binding; go_function: protein serine/threonine kinase activity; go_function: diacylglycerol-activated phospholipid-dependent protein ki…	protein kinase C; delta	440	TRUE	3:53169675-53171298
cg02630207	2	45693157	NCBI:RefSeq	36.1	CGACCAAGAGTAGGAACCAGATACAGCCAGAGGAAACAGACACCCAAGCA	45691907	-	GeneID:55133	FLJ10379		NM_018079.3	GI:39841072	H_NH0576F01.1; WUGSC:H_NH0576F01.1; go_function: DNA binding; go_function: RNA binding; go_function: hydrolase activity; acting on ester bonds; go_process: nucleobase; nucleoside; nucleotide and nucleic acid metabolism	hypothetical protein FLJ10379	1250	FALSE
cg02630694	10	12276839	NCBI:RefSeq	36.1	CGAGCTTTAGGCTTGCGCGAGGCATCTGCGTCTAAAAGTATCTCCTTAAA	12277971	+	GeneID:8872	C10orf7	D123;	NM_006023.1	GI:5174422	go_component: cytoplasm; go_process: cell cycle arrest; go_process: positive regulation of cell proliferation	D123 gene product	1132	TRUE	10:12276701-12277194
cg02633817	19	40298572	NCBI:RefSeq	36.1	CGCTAGCATCTTCTGCTGATCCTGAAATTGTACCAGCGGCAAGATGTGGC	40298639	+	GeneID:5349	FXYD3	MAT8; PLML; MAT-8; MGC111076;	NM_021910.1	GI:11612673	isoform 2 precursor is encoded by transcript variant 2; phospholemman-like protein; FXYD domain-containing ion transport regulator 3; go_component: membrane; go_component: integral to plasma membrane; go_function: ion channel activity; go_function: chloride channel activity; go_process: ion transport; go_process: chloride transport	FXYD domain containing ion transport regulator 3 isoform 2 precursor	67	FALSE
cg02641676	8	42516921	NCBI:RefSeq	36.1	TGGTCAATTTTAGAATCACCTAGACGTGACATCAGGAACCCAAAATCACG	42516225	-	GeneID:6575	SLC20A2	GLVR2; MLVAR; PIT-2; Glvr-2;	NM_006749.3	GI:34222154	murine leukemia virus; amphotropic; receptor for; gibbon ape leukemia virus receptor 2; go_component: membrane; go_component: membrane fraction; go_component: integral to plasma membrane; go_function: receptor activity; go_function: sodium:phosphate symporter activity; go_function: inorganic phosphate transporter activity; go_process: transport; go_process: phosphate transport	solute carrier family 20; member 2	696	TRUE	8:42516849-42517070
cg02643667	21	42659768	NCBI:RefSeq	36.1	TTATTGTCTCAGAGGATCCCCGGGCCTCCTTAGGCAAATGTTATCTAACG	42659713	-	GeneID:7031	TFF1	pS2; BCEI; HPS2; HP1.A; pNR-2; D21S21;	NM_003225.2	GI:48928023	breast cancer estrogen-inducible sequence; gastrointestinal trefoil protein pS2; go_function: growth factor activity; go_process: digestion; go_process: defense response; go_process: carbohydrate metabolism	trefoil factor 1 precursor	55	FALSE
cg02658214	12	55614231	NCBI:RefSeq	36.1	CGTCTTCATCACAGGCTGTGACTCTGGCTTCGGGAACCTGCTGGCCAAAC	55614312	-	GeneID:121214	SDR-O	RDHS; SDRO; FLJ16333; MGC126600; MGC126602;	NM_148897.1	GI:22507404	retinol dehydrogenase similar protein; go_function: oxidoreductase activity; go_process: metabolism	orphan short-chain dehydrogenase / reductase	81	FALSE
cg02659086	11	67107552	NCBI:RefSeq	36.1	CGGGGGGAAATTCCCTAAGACCGCTGCGATCCCGGAGCTTGCACACCCGC		+	GeneID:2950	GSTP1	PI; DFN7; GST3; FAEES3;	NT_033903.7	glutathione transferase	deafness; X-linked 7; fatty acid ethyl ester synthase III; go_component: cytoplasm; go_function: transferase activity; go_function: glutathione transferase activity; go_process: metabolism; go_process: anti-apoptosis; go_process: central nervous system development			TRUE	11:67106980-67108634
cg02674804	19	1443043	NCBI:RefSeq	36.1	TGTGACTCCATTACAGTTCTTCCGTGACTTTCACCCTTGGTGACGCTGCG	1442165	+	GeneID:92840	REEP6	DP1L1; TB2L1; C19orf32; FLJ25383;	NM_138393.1	GI:19923918	receptor expression enhancing protein 6; go_component: membrane; go_component: integral to membrane	polyposis locus protein 1-like 1	878	TRUE	19:1441050-1443157
cg02679745	9	139047467	NCBI:RefSeq	36.1	ACCAAGCCTGACCTGCATTGAGATCTCCAGGACGTCTGGGTCTGGCCACG	139047283	-	GeneID:2529	FUT7		NM_004479.2	GI:56090657	go_component: membrane; go_component: Golgi stack; go_component: integral to membrane; go_function: alpha(1;3)-fucosyltransferase activity; go_function: transferase activity; transferring glycosyl groups; go_process: L-fucose catabolism; go_process: protein amino acid glycosylation	fucosyltransferase 7 (alpha (1;3) fucosyltransferase)	184	FALSE
cg02694395	1	169550517	NCBI:RefSeq	36.1	TATCATCATCCTACCATGCTCTTGCTTTGTTACAGTATTTTTTTCCCACG	169550110	+	GeneID:2329	FMO4	FMO2;	NM_002022.1	GI:4503758	go_component: microsome; go_component: integral to membrane; go_component: endoplasmic reticulum; go_function: monooxygenase activity; go_function: dimethylaniline monooxygenase (N-oxide-forming) activity; go_process: electron transport; go_process: xenobiotic metabolism	flavin containing monooxygenase 4	407	FALSE
cg02706881	21	45670203	NCBI:RefSeq	36.1	CGCACAGATGTGCTGTTCTAACTTGGGATAAATGTGGATCTCGTGAATCC	45669413	-	GeneID:378832	C21orf123	PRED80;	NM_199175.1	GI:40316842	synonym: PRED80	hypothetical protein LOC378832	790	FALSE
cg02712165	17	16336682	NCBI:RefSeq	36.1	CATTCAGTAGGTCTCGGTGGAGGCCTTAGAGCCTGCGTTTTTAACCAGCG	16335889	-	GeneID:388341	C17orf76	FLJ35696;	NM_207387.1	GI:46409405	synonym: FLJ35696	hypothetical protein LOC388341	793	TRUE	17:16335555-16336876
cg02717046	12	130004741	NCBI:RefSeq	36.1	CGTGTTTATTGATCACTGAAGAATCTCAAGTTTTGAGACGAGGAAGAAAC	130004790	+	GeneID:283383	GPR133	PGR25; FLJ16770; DKFZp434B1272;	NM_198827.2	GI:45433551	G-protein coupled receptor GPR133; go_component: membrane; go_component: integral to membrane; go_component: integral to membrane; go_function: receptor activity; go_function: G-protein coupled receptor activity; go_function: G-protein coupled receptor activity; go_process: signal transduction; go_process: neuropeptide signaling pathway	G protein-coupled receptor 133	49	TRUE	12:130004410-130004836
cg02719245	14	94694046	NCBI:RefSeq	36.1	AGTGGGTGTTTGTTATTTCCCCAAATGCGGAGGCCCCTGCACCACTAACG	94693512	-	GeneID:23405	DICER1	Dicer; HERNA; KIAA0928;	NM_030621.2	GI:29294648	K12H4.8-LIKE; helicase-moi; helicase with RNAse motif; go_component: intracellular; go_function: ATP binding; go_function: hydrolase activity; go_function: nucleotide binding; go_function: protein binding; go_function: protein binding; go_function: endonuclease activity; go_function: ribonuclease III activity; go_function: ATP-dependent helicase activity; go_function: double-stranded RNA binding;…	dicer1	534	TRUE	14:94692754-94694246
cg02720618	6	152171484	NCBI:RefSeq	36.1	GGAGGTGTTTTCCCCCACAAATAACTGCTGCTTTGTCTGGTTTTCCAACG		+	GeneID:2099	ESR1	ER; ESR; Era; ESRA; NR3A1; major ORF; DKFZp686N23123;	NT_025741.14	estrogen receptor 1	oestrogen receptor; estrogen receptor 1 (alpha); dJ443C4.1.1 (estrogen receptor 1); steroid hormone receptor; go_component: nucleus; go_component: nucleus; go_component: membrane; go_component: chromatin remodeling complex; go_function: DNA binding; go_function: lipid binding; go_function: steroid binding; go_function: zinc ion binding; go_function: metal ion binding; go_function: receptor activi…			TRUE	6:152170010-152172178
cg02723533	11	69178172	NCBI:RefSeq	36.1	CGACAGACAAAGCGTCCCTCAAGGCCCCCGCGTGGTTCAGACAGACGCCG		+	GeneID:595	CCND1	BCL1; PRAD1; U21B31; D11S287E; cyclin D1;	NT_078088.3	cyclin D1	B-cell CLL/lymphoma 1; G1/S-specific cyclin D1; parathyroid adenomatosis 1; go_component: nucleus; go_function: protein binding; go_function: protein binding; go_process: cell division; go_process: G1/S transition of mitotic cell cycle; go_process: regulation of progression through cell cycle			TRUE	11:69177944-69178494
cg02727285	19	50196082	NCBI:RefSeq	36.1	CAACAACGCACAAAACATAAATTCTGAAGCTGACACGCTAGCTTTAAACG	50196552	+	GeneID:5971	RELB	I-REL;	NM_006509.2	GI:35493877	v-rel avian reticuloendotheliosis viral oncogene homolog B (nuclear factor of kappa light polypeptide gene enhancer in B-cells 3); go_component: nucleus; go_function: protein binding; go_function: transcription factor activity; go_function: transcription corepressor activity; go_process: regulation of transcription; DNA-dependent	reticuloendotheliosis viral oncogene homolog B	470	TRUE	19:50195726-50197301
cg02727423	14	99328726	NCBI:RefSeq	36.1	CGTGACAGATCTGTATCCCAGGGGCTGATCATAGAGAAACCACAAAGCGA	99329498	+	GeneID:2009	EML1	EMAP; ELP79; EMAPL; HuEMAP; FLJ45033;	NM_004434.2	GI:56790929	isoform b is encoded by transcript variant 2; echinoderm microtubule-associated protein-like; go_component: microtubule; go_component: microtubule associated complex; go_process: visual perception	echinoderm microtubule associated protein like 1 isoform b	772	TRUE	14:99328718-99330143
cg02729303	5	16561920	NCBI:RefSeq	36.1	AAGTGCTCCTCCCTTACTCAGAAAGTTGGTGTTTACAAACTTCCAAAGCG	16561937	-	GeneID:54463	FLJ20152	FLJ22155; FLJ22179;	NM_019000.2	GI:21361616	synonyms: FLJ22155; FLJ22179	hypothetical protein LOC54463	17	FALSE
cg02729352	19	57244255	NCBI:RefSeq	36.1	AGGTGACTTTAATTTTCCATTGAGCTGAGACGTCACAGCCATCATAACCG	57243885	-	GeneID:9668	ZNF432		NM_014650.2	GI:45331209	go_component: nucleus; go_function: DNA binding; go_function: zinc ion binding; go_function: metal ion binding; go_process: transcription; go_process: regulation of transcription; DNA-dependent	zinc finger protein 432	370	TRUE	19:57243507-57244601
cg02740128	17	7064584	NCBI:RefSeq	36.1	GGCAAATTTCAGGGCTCTGGTTGGGTCTGGCTAAGGTCCACCTGGCCTCG	7063754	-	GeneID:1742	DLG4	PSD95; SAP90;	NM_001365.1	GI:4557528	membrane-associated guanylate kinase; discs large homolog 4; synapse-associated protein 90; go_component: cortical cytoskeleton; go_component: postsynaptic membrane; go_function: protein binding; go_function: protein C-terminus binding; go_process: learning; go_process: signal transduction; go_process: synaptic transmission; go_process: protein complex assembly; go_process: nervous system develop…	postsynaptic density protein 95	830	TRUE	17:7063664-7064622
cg02750754	19	46561781	NCBI:RefSeq	36.1	AAGCGGCAACCGGGGTTGTAGTTCATGGGCTTGACTGCTTCTTTTCTCCG	46561877	-	GeneID:80776	MGC4093		NM_030578.2	GI:34147390		hypothetical protein LOC80776	96	TRUE	19:46561382-46562172
cg02755455	1	65124970	NCBI:RefSeq	36.1	ACAGCCCCTCTCCTGATTGTGTGAACAATAGTTTAAGACACCCAAAAACG	65124574	-	GeneID:3716	JAK1	JAK1A; JAK1B;	NM_002227.1	GI:4504802	go_component: cytoskeleton; go_function: ATP binding; go_function: nucleotide binding; go_function: transferase activity; go_function: Janus kinase activity; go_function: protein-tyrosine kinase activity; go_process: intracellular signaling cascade; go_process: protein amino acid phosphorylation	janus kinase 1	396	FALSE
cg02762689	6	42271400	NCBI:RefSeq	36.1	AGATCAAGTCCTAGGCCATAAAACAGAATCTGCTGGTGATCTGGGACTCG	42270672	-	GeneID:2979	GUCA1B	GCAP2; GUCA2; DKFZp686E1183;	NM_002098.3	GI:62751778	guanylate cyclase-activating protein 2; go_function: calcium ion binding; go_function: calcium sensitive guanylate cyclase activator activity; go_process: visual perception; go_process: sensory perception; go_process: fluid secretion; go_process: cell-cell signaling; go_process: receptor guanylyl cyclase signaling pathway	guanylate cyclase activator 1B (retina)	728	FALSE
cg02763671	22	18483541	NCBI:RefSeq	36.1	GTGCGAGCAGGTGCTGCAGAAACTTGCCAAGTGAGTGTGGGCGCAAGACG	18485024	+	GeneID:5902	RANBP1	MGC88701;	NM_002882.2	GI:6382077	go_component: nucleus; go_component: cytoplasm; go_function: Ran GTPase binding; go_function: GTPase activator activity; go_function: GDP-dissociation inhibitor activity; go_process: intracellular transport; go_process: signal transduction	RAN binding protein 1	1483	FALSE
cg02764611	19	10287516	NCBI:RefSeq	36.1	GGTGGCGCTGGGGACAACCAGAAAGTTTCAAGCGACAGGTACCTGGGGCG	10287685	-	GeneID:112812	MGC19604	MGC74760;	NM_080665.3	GI:41529828	isoform 2 is encoded by transcript variant 2; similar to P0671D01.19; go_function: iron ion binding; go_function: metal ion binding; go_function: electron transporter activity; go_process: electron transport	hypothetical protein LOC112812 isoform 2	169	TRUE	19:10287036-10287894
cg02774160	22	23309633	NCBI:RefSeq	36.1	CGGAGAAGGTTGGCCTCATTGCCATGCAGGTGTTTAGAGCCTTCACGACC	23309718	+	GeneID:2678	GGT1	GGT; GTG; CD224; D22S672; D22S732; MGC96963;	NM_005265.2	GI:73915089	glutamyl transpeptidase; go_component: membrane; go_component: integral to membrane; go_function: transferase activity; go_function: acyltransferase activity; go_function: gamma-glutamyltransferase activity; go_process: glutathione biosynthesis; go_process: amino acid metabolism	gamma-glutamyltransferase 1 precursor	85	FALSE
cg02786378	8	17441223	NCBI:RefSeq	36.1	ATGATTTTCATGAGCCTAATGATACATGTGAGATCTTTCTTAGCCCCACG	17440685	+	GeneID:6542	SLC7A2	ATRC2; CAT-2; HCAT2;	NM_001008539.1	GI:56549678	isoform 1 is encoded by transcript variant 1; amino acid transporter; cationic 2; cationic amino acid transporter; y+ system; low-affinity cationic amino acid transporter-2; go_component: membrane; go_component: integral to membrane; go_component: membrane fraction; go_component: integral to plasma membrane; go_function: amino acid permease activity; go_function: basic amino acid transporter acti…	solute carrier family 7; member 2 isoform 1	538	FALSE
cg02789485	12	74069695	NCBI:RefSeq	36.1	CGCTAGAAGTATTTTAGTATGGCTAGAACCTATTTAAGGGTGAAGGTGGC	74071156	+	GeneID:144321	MGC39497		NM_152436.1	GI:22748922	go_component: extracellular region	hypothetical protein LOC144321	1461	FALSE
cg02792677	19	10223626	NCBI:RefSeq	36.1	CGAGCCGGTGCAGGAATTCAGCCAATGAGACCTCTCTGGCCCAATTCAGC	10223640	+	GeneID:51073	MRPL4	L4mt; CGI-28; MGC2681; MGC16367;	NM_015956.2	GI:22547135	isoform a is encoded by transcript variant 1; go_component: ribosome; go_component: intracellular; go_function: structural constituent of ribosome; go_process: protein biosynthesis	mitochondrial ribosomal protein L4 isoform a	14	TRUE	19:10222984-10224554
cg02802055	9	131636915	NCBI:RefSeq	36.1	CTGGGATGCCCTCGAAGGTGCCTTATTGGCTCTGTTAGCTTTGGATTCCG	131637570	+	GeneID:10868	USP20	VDU2; LSFR3A; KIAA1003;	NM_001008563.1	GI:56682956	pVHL-interacting deubiquitinating enzyme 2; go_component: cellular component unknown; go_function: ubiquitin thiolesterase activity; go_function: cysteine-type endopeptidase activity; go_process: protein deubiquitination; go_process: ubiquitin-dependent protein catabolism	ubiquitin specific protease 20	655	TRUE	9:131636572-131638316
cg02806093	14	21014807	NCBI:RefSeq	36.1	CTCTTCAAGTATATCATCATCGGAGACACAGGTAACCCTCAGGTGGTTCG	21014961	-	GeneID:84932	RAB2B	FLJ14824;	NM_032846.2	GI:21361883	RAS family; member RAB2B; GTP-binding protein RAB2B; go_component: Golgi stack; go_component: endoplasmic reticulum; go_function: GTP binding; go_function: nucleotide binding; go_process: protein transport; go_process: ER to Golgi transport; go_process: small GTPase mediated signal transduction	RAB2B protein	154	TRUE	14:21014515-21015785
cg02806777	19	51218157	NCBI:RefSeq	36.1	CGGCGGGACATAGTGGCAGGGCGGCAGGGTCCGGGAGACCGCTAGGAGCG	51218163	-	GeneID:8993	PGLYRP1	PGRP; TAG7; PGRPS; PGLYRP; PGRP-S; TNFSF3L; MGC126894; MGC126896;	NM_005091.1	GI:4827035	TNF superfamily; member 3 (LTB)-like (peptidoglycan recognition protein); go_component: extracellular region; go_function: protein binding; go_function: bacterial binding; go_function: peptidoglycan receptor activity; go_function: N-acetylmuramoyl-L-alanine amidase activity; go_process: peptidoglycan catabolism; go_process: detection of bacteria; go_process: innate immune response; go_process: de…	peptidoglycan recognition protein 1	6	TRUE	19:51217863-51218220
cg02807450	11	95297391	NCBI:RefSeq	36.1	CGGGAATTTGAAAGGGCAGGGAAAAATCGGTGAAAGTTTGTCTTCTACTT	95296920	-	GeneID:8898	MTMR2	CMT4B; CMT4B1; KIAA1073;	NM_016156.3	GI:41350313	isoform 1 is encoded by transcript variant 1; go_component: nucleus; go_component: cytoplasm; go_function: hydrolase activity; go_function: protein binding; go_function: protein tyrosine phosphatase activity; go_function: inositol or phosphatidylinositol phosphatase activity; go_function: inositol or phosphatidylinositol phosphatase activity; go_function: protein tyrosine/serine/threonine phospha…	myotubularin-related protein 2 isoform 1	471	FALSE
cg02810134	20	43889329	NCBI:RefSeq	36.1	CTTGTCCTTACCATGGTTGCTGGTGACCGGGACTCCTCTGTTGCAGGTCG	43889360	-	GeneID:7125	TNNC2		NM_003279.2	GI:40807466	troponin C2; fast; go_component: troponin complex; go_function: calcium ion binding; go_process: muscle development; go_process: regulation of muscle contraction	fast skeletal muscle troponin C	31	FALSE
cg02815516	19	11167319	NCBI:RefSeq	36.1	CGGGAGAACAAGGACAAGCTCAGGTGCCCCTGGAGCCCCAGCCCTGCCTT	11167496	-	GeneID:25959	ANKRD25	SIP; MXRA3; FLJ20004; KIAA1518; MGC119707; DKFZp434N161;	NM_015493.4	GI:58374128	SRC-1 interacting protein; matrix-remodelling associated 3	ankyrin repeat domain 25	177	TRUE	19:11167294-11167567
cg02822723	5	946431	NCBI:RefSeq	36.1	CCGTGAGCTGAGGTCGGGTCGGGGCTCAATCTGTGAGCTGGGGTCCTGCG	946004	+	GeneID:9319	TRIP13	16E1BP;	NM_004237.2	GI:20149561	thyroid receptor interacting protein 13; go_component: nucleus; go_component: nucleus; go_function: ATP binding; go_function: ATP binding; go_function: nucleotide binding; go_function: protein binding; go_function: nucleoside-triphosphatase activity; go_function: transcription cofactor activity; go_process: transcription from RNA polymerase II promoter	thyroid hormone receptor interactor 13	427	TRUE	5:945432-946596
cg02825709	16	3294208	NCBI:RefSeq	36.1	CGAGTTTATGTGGCACTTATACTGGAGTCCTTTGAATGGGAATGAAAAGA	3295485	+	GeneID:7627	ZNF75A	FLJ31529;	NM_153028.1	GI:23308516	go_component: nucleus; go_function: DNA binding; go_function: zinc ion binding; go_function: metal ion binding; go_process: transcription; go_process: regulation of transcription; DNA-dependent	zinc finger protein 75a	1277	TRUE	16:3293753-3294222
cg02829654	1	234113562	NCBI:RefSeq	36.1	CGCAAGGGCTTCTAAGAAGCCATCCCAATGACCTTTTGGCTTTGAGAAGA	234113563	-	GeneID:1130	LYST	CHS; CHS1;	NM_000081.2	GI:54292122	isoform 1 is encoded by transcript variant 1; beige protein; Chediak-Higashi syndrome 1; go_component: endosome; go_component: microtubule cytoskeleton; go_process: protein transport; go_process: signal transduction; go_process: cellular defense response; go_process: endosome to lysosome transport	lysosomal trafficking regulator isoform 1	1	FALSE
cg02848777	10	98263704	NCBI:RefSeq	36.1	CGGCCACTGCTCCAACCACCGCCGCCACCGCCACACTCGCAGCCGCCGCA	98263658	-	GeneID:7093	TLL2	KIAA0932;	NM_012465.2	GI:22547222	go_function: astacin activity; go_function: calcium ion binding; go_function: metallopeptidase activity; go_process: proteolysis	tolloid-like 2	46	TRUE	10:98262142-98264128
cg02849695	1	158136584	NCBI:RefSeq	36.1	GGGGCGGGGCCTGAGCCGAAGAACGCGGGCTAGTGGTTGCCAAGGTAACG	158136563	-	GeneID:25790	CCDC19	NESG1; RP11-190A12.6;	NM_012337.1	GI:6912525	nasopharyngeal epithelium specific protein 1 (NESG1); go_component: soluble fraction	nasopharyngeal epithelium specific protein 1	21	TRUE	1:158135769-158136899
cg02854090	6	25834874	NCBI:RefSeq	36.1	TCTGATTGGCTGATGGCCGTCTACCCAATCAGAAAGTCGTACTAGAATCG	25834769	-	GeneID:221613	HIST1H2AA	H2AFR; bA317E16.2;	NM_170745.3	GI:52426769	H2A histone family; member R; go_component: nucleus; go_component: nucleosome; go_function: DNA binding; go_process: nucleosome assembly; go_process: chromosome organization and biogenesis (sensu Eukaryota)	histone H2A	105	TRUE	6:25834320-25834896
cg02862362	6	131936795	NCBI:RefSeq	36.1	CGGGTTGGCAACTCTAAAAGGATTTTAATGGATTTATGAAACCCCCAGAT	131936058	+	GeneID:383	ARG1		NM_000045.2	GI:10947138	A-I; go_component: cytoplasm; go_function: metal ion binding; go_function: hydrolase activity; go_function: arginase activity; go_function: manganese ion binding; go_process: urea cycle; go_process: arginine catabolism	arginase; type I	737	FALSE
cg02868123	2	79236421	NCBI:RefSeq	36.1	AGACACAAGTTCTGGATTTTCCCAGTTCCAGGCGAGGCTCTGTGGACTCG	79236690	-	GeneID:5969	REGL		XR_000606.1	GI:88953273	Derived by automated computational analysis using gene prediction method: GNOMON.		269	FALSE
cg02868306	19	8361008	NCBI:RefSeq	36.1	TCTCATTAGTTATTTGGTCTGTCAATCCATTTCATTCCTGCAGTCTTCCG	8361296	+	GeneID:9230	RAB11B	H-YPT3; MGC133246;	NM_004218.1	GI:4758985	RAB11B; member of RAS oncogene family; go_function: GTP binding; go_function: nucleotide binding; go_function: GTPase activity; go_process: intracellular protein transport; go_process: small GTPase mediated signal transduction	RAB11B; member RAS oncogene family	288	TRUE	19:8360382-8361908
cg02874605	12	99185909	NCBI:RefSeq	36.1	CGGATGGAGGAGGGTTTAGACCGATAAAGCTTGCAAAAACTTATTGGACT	99184988	-	GeneID:120863	DEPDC4	DEP.4; FLJ33505;	NM_152317.1	GI:22748694	go_process: intracellular signaling cascade	DEP domain containing 4	921	TRUE	12:99184760-99185938
cg02880176	17	17050542	NCBI:RefSeq	36.1	TGGCGTGTGGCCATGGGTGCTGGGCGTGGCCTGGCACGTGGCCTGGCACG	17050357	-	GeneID:201164	LOC201164		NM_178836.2	GI:31343395	go_function: hydrolase activity; go_process: metabolism; go_process: lipid catabolism	hypothetical protein LOC201164	185	TRUE	17:17049380-17050976
cg02883161	12	119292001	NCBI:RefSeq	36.1	GAGGATACGGTTTCTACTGGGGTGCTGATGGAGGTTCCCCACTCGGGACG	119291341	-	GeneID:4440	MSI1		NM_002442.2	GI:25121990	Musashi (Drosophila) homolog 1; go_component: nucleus; go_function: RNA binding; go_function: nucleotide binding; go_process: nervous system development	musashi 1	660	TRUE	12:119290126-119292199
cg02883621	4	6745824	NCBI:RefSeq	36.1	CTGTGAGCATCCAGCCTTACTTTTGTATCCAATCATATTTCCATACTTCG	6746467	+	GeneID:6286	S100P	MIG9;	NM_005980.2	GI:45827727	S100 calcium-binding protein P; migration-inducing gene 9; go_component: nucleus; go_component: cytoplasm; go_function: calcium ion binding; go_function: magnesium ion binding; go_function: calcium-dependent protein binding	S100 calcium binding protein P	643	FALSE
cg02887841	22	18124670	NCBI:RefSeq	36.1	CGGCTGCCTATACTCACTCGCTTGATTTCGGACCCCCGGACCCCGTTGCT	18124226	+	GeneID:6899	TBX1	DGS; TGA; CAFS; CTHM; DGCR; DORV; VCFS; TBX1C;	NM_080646.1	GI:18104949	isoform A is encoded by transcript variant A; brachyury; T-box 1 transcription factor C; Testis-specific T-box protein; go_component: nucleus; go_function: transcription factor activity; go_function: RNA polymerase II transcription factor activity; go_process: transcription; go_process: morphogenesis; go_process: heart development; go_process: regulation of transcription from RNA polymerase II pr…	T-box 1 isoform A	444	TRUE	22:18123862-18124770
cg02901159	11	77026459	NCBI:RefSeq	36.1	TTGTTCTTCCGGGGTGACTGCCTCTTCCAGGGCGGGCGGTGTGGTGCACG	77026495	-	GeneID:1207	CLNS1A	CLCI; ICln; CLNS1B;	NM_001293.1	GI:4502890	go_component: nucleus; go_component: plasma membrane; go_function: auxiliary transport protein activity; go_process: transport; go_process: transport; go_process: circulation; go_process: visual perception; go_process: chloride transport; go_process: regulation of cell volume	chloride channel; nucleotide-sensitive; 1A	36	TRUE	11:77025998-77026768
cg02906939	2	138437785	NCBI:RefSeq	36.1	CGCGCTTAGGGAAGGATTCTATGGACTGCACTTTTACCCTGGTGTCCTGC	138438278	+	GeneID:3176	HNMT	HMT; HNMT-S1; HNMT-S2;	NM_006895.2	GI:66932961	isoform 1 is encoded by transcript variant 1; go_function: transferase activity; go_function: methyltransferase activity; go_function: histamine N-methyltransferase activity; go_function: S-adenosylmethionine-dependent methyltransferase activity; go_process: respiratory gaseous exchange	histamine N-methyltransferase isoform 1	493	FALSE
cg02912041	3	191650257	NCBI:RefSeq	36.1	GATAGTTACCTGGAATAGCGGCAAACACAAGATCCCTATCGTTGAGATCG	191650359	-	GeneID:131920	UNQ846		NM_207316.1	GI:46409275		hypothetical protein LOC131920	102	FALSE
cg02914379	6	41713762	NCBI:RefSeq	36.1	CGCCCATCTTTGGGGCAAAGAGATTTGGAGGCCGCAATTATTCAGACAGT	41714231	+	GeneID:4188	MDFI	I-MF;	NM_005586.2	GI:13027633	go_component: cytoplasm; go_function: receptor activity; go_function: protein binding; go_process: cell differentiation; go_process: embryonic development; go_process: cytoplasmic sequestering of transcription factor	MyoD family inhibitor	469	TRUE	6:41712413-41714762
cg02921257	3	39208862	NCBI:RefSeq	36.1	CGTCCATTTCAGAAGGAGAGGGGATCCCAGCTGTGAAAGCCAGCCTTGCT	39209081	-	GeneID:165904	CMYA1	Xin; DKFZp451D042; DKFZp779C1947;	NM_194293.2	GI:40255271	synonyms: Xin; DKFZp451D042; DKFZp779C1947	cardiomyopathy associated 1	219	FALSE
cg02922563	3	48462812	NCBI:RefSeq	36.1	CGTTTGAGTCGAGCCAGGCATCATTCAGGGATGTGGTCTCCGTGACCTCG	48463222	+	GeneID:11277	TREX1	DRN3; ATRIP; FLJ12343; DKFZp434J0310;	NM_016381.2	GI:18375529	isoform a is encoded by transcript variant 1; deoxyribonuclease III; dnaQ/mutD (E. coli)-like; 3 repair exonuclease 1; ATR interacting protein; go_component: nucleus; go_component: nuclear membrane; go_component: nuclear membrane; go_function: hydrolase activity; go_function: magnesium ion binding; go_function: single-stranded DNA binding; go_function: single-stranded DNA binding; go_function: ex…	three prime repair exonuclease 1 isoform a	410	TRUE	3:48462669-48463727
cg02929869	3	151171273	NCBI:RefSeq	36.1	CGGCCTCCTGGCAGCAGCCATCGCACATCAGGTTATCCACGTAGCTCTGC	151171586	-	GeneID:5217	PFN2	PFL; D3S1319E;	NM_053024.2	GI:62422564	isoform a is encoded by transcript variant 1; profilin-2; go_component: actin cytoskeleton; go_function: actin binding; go_function: protein binding; go_function: protein binding; go_function: phosphatidylinositol-4;5-bisphosphate binding; go_process: cytoskeleton organization and biogenesis; go_process: actin cytoskeleton organization and biogenesis; go_process: regulation of actin polymerizatio…	profilin 2 isoform a	313	TRUE	3:151170483-151172364
cg02936872	9	98841371	NCBI:RefSeq	36.1	CGCAGCCCAGTCCCAACCCGTCTCAGGTCTGGGCGCGCCTACCTCAATAC	98841360	-	GeneID:1515	CTSL2	CTSU; CTSV; CATL2; MGC125957;	NM_001333.2	GI:23110959	cathepsin U; cathepsin V; cathepsin L2; preproprotein; go_component: lysosome; go_function: cathepsin L activity; go_process: proteolysis	cathepsin L2 preproprotein	11	TRUE	9:98840611-98841928
cg02937479	6	32206012	NCBI:RefSeq	36.1	AGTCTCGCGGGCTCCAGGGTTAGTTGTCAGTATCTTTCCCAGTTGTTCCG	32206045	-	GeneID:63943	FKBPL	NG7; DIR1; WISP39;	NM_022110.3	GI:34304364	FK506-binding protein like; go_component: cellular component unknown; go_function: binding; go_process: response to radiation	WAF-1/CIP1 stabilizing protein 39	33	TRUE	6:32205654-32207473
cg02938601	8	23017033	NCBI:RefSeq	36.1	AATAAAATTAACCCCATGTTTACATTCTTAAACGTGTTCCTTGGAGATCG		+	GeneID:8794	TNFRSF10C	LIT; DCR1; TRID; CD263; TRAILR3;	NT_023666.17	tumor necrosis factor receptor superfamily; member 10c precursor	decoy receptor 1; TRAIL receptor 3; TNF related TRAIL receptor; lymphocyte inhibitor of TRAIL; decoy without an intracellular domain; antagonist decoy receptor for TRAIL/Apo-2L; TNF related apoptosis-inducing ligand receptor 3; go_component: membrane; go_component: integral to plasma membrane; go_function: transmembrane receptor activity; go_process: apoptosis; go_process: signal transduction			TRUE	8:23016236-23017035
cg02939139	12	112058587	NCBI:RefSeq	36.1	CGCTTAGAACAGTGCCTGGCACCCATGAAGTGTTCAAACAACTGTAGATG	112058404	-	GeneID:8437	RASAL1	RASAL;	NM_004658.1	GI:4759025	RAS-GTPase-activating protein-like; GAP1 like protein; go_function: metal ion binding; go_function: phospholipid binding; go_function: Ras GTPase activator activity; go_process: intracellular signaling cascade	RAS protein activator like 1	183	TRUE	12:112058279-112058595
cg02941816	10	131155686	NCBI:RefSeq	36.1	GGAAAGGCTGGGCAACACCTGGGAGGCACTTGGGGCGCACCTGGAGCTCG	131155456	+	GeneID:4255	MGMT	9606;	NM_002412.2	GI:49574515	Methylguanine-DNA methyltransferase; O6-methylguanine-DNA methyltransferase; go_component: nucleus; go_function: DNA binding; go_function: transferase activity; go_function: DNA-methyltransferase activity; go_function: methylated-DNA-[protein]-cysteine S-methyltransferase activity; go_process: DNA repair; go_process: DNA ligation	O-6-methylguanine-DNA methyltransferase	230	TRUE	10:131154808-131155770
cg02943497	13	23985090	NCBI:RefSeq	36.1	ATTGACAAAATCCCTCCTGAAATATGAAACTGAAAGCCCTGAACCCTCCG	23984948	-	GeneID:143	PARP4	PH5P; p193; PARPL; VPARP; VAULT3; ADPRTL1;	NM_006437.2	GI:11496990	vault protein; 193-kDa; poly(ADP-ribose) synthetase; H5 proline-rich; PARP-related; I-alpha-I-related; poly(ADP-ribosyl)transferase-like 1; ADP-ribosyltransferase (NAD+; poly (ADP-ribose) polymerase)-like 1; go_component: nucleus; go_component: ribonucleoprotein complex; go_function: DNA binding; go_function: enzyme binding; go_function: NAD+ ADP-ribosyltransferase activity; go_function: transfer…	poly (ADP-ribose) polymerase family; member 4	142	TRUE	13:23984387-23985246
cg02944057	6	34467479	NCBI:RefSeq	36.1	CTACCCAGCGCACTGTAAAATAAACAGCTGGCTATGGCTTATGCACAACG	34468419	-	GeneID:11165	NUDT3	DIPP; DIPP1;	NM_006703.2	GI:37622350	diphosphoinositol polyphosphate phosphohydrolase; go_component: intracellular; go_function: hydrolase activity; go_function: magnesium ion binding; go_function: diphosphoinositol-polyphosphate diphosphatase activity; go_process: cell-cell signaling; go_process: intracellular transport; go_process: calcium-mediated signaling; go_process: intracellular signaling cascade; go_process: regulation of R…	nudix-type motif 3	940	TRUE	6:34467413-34468976
cg02945019	1	158817112	NCBI:RefSeq	36.1	CGAGTCCTCATGCTAGCTAGCTCATTCCTAGGTAACCTGGCCTCTAGAGT	158815889	-	GeneID:8832	CD84	LY9B; hCD84; mCD84; SLAMF5; DKFZp781E2378;	NM_003874.1	GI:4502686	leukocyte antigen CD84; leukocyte differentiation antigen; leukocyte differentiation antigen CD84; leucocyte differentiation antigen CD84; go_component: plasma membrane; go_component: integral to plasma membrane; go_process: defense response; go_process: homophilic cell adhesion	CD84 antigen (leukocyte antigen)	1223	FALSE
cg02951021	12	119418679	NCBI:RefSeq	36.1	GAGCCGCAATGTCCTTCTCTATGTTGTATTTCTCCAGCGCCTGAGTAGCG	119418316	+	GeneID:8655	DNCL1	LC8; PIN; DLC1; DLC8; hdlc1; MGC126137; MGC126138;	NM_003746.1	GI:4505812	protein inhibitor of neuronal nitric oxide synthase; dynein; cytoplasmic; light chain (protein inhibitor of neuronal NOS); go_component: microtubule; go_component: dynein complex; go_function: microtubule motor activity; go_process: microtubule-based process	cytoplasmic dynein light polypeptide	363	TRUE	12:119417908-119419160
cg02953306	8	27392543	NCBI:RefSeq	36.1	CGGCTTCATGCAGGTGCCACTGAGGACAGCCCAGGCAGCCCAGCACAAGC	27392675	-	GeneID:1135	CHRNA2		NM_000742.1	GI:4502822	go_component: integral to membrane; go_component: postsynaptic membrane; go_component: nicotinic acetylcholine-gated receptor-channel complex; go_function: ion channel activity; go_function: acetylcholine receptor activity; go_function: extracellular ligand-gated ion channel activity; go_function: nicotinic acetylcholine-activated cation-selective channel activity; go_process: ion transport; go_p…	cholinergic receptor; nicotinic; alpha polypeptide 2 (neuronal)	132	FALSE
cg02966329	6	80771193	NCBI:RefSeq	36.1	CGGCTGTTCCTCAGTGCGCCGGTGCACCGGTAAGACAGAACTTACCTACA	80771078	+	GeneID:7272	TTK	ESK; PYT; MPS1L1;	NM_003318.3	GI:34303964	phosphotyrosine picked threonine kinase (PYT); go_component: spindle; go_function: binding; go_function: ATP binding; go_function: kinase activity; go_function: nucleotide binding; go_function: transferase activity; go_function: protein-tyrosine kinase activity; go_function: protein serine/threonine kinase activity; go_process: mitotic spindle checkpoint; go_process: protein amino acid phosphoryl…	TTK protein kinase	115	TRUE	6:80770229-80771473
cg02966851	6	5205199	NCBI:RefSeq	36.1	TGAGGGCCTAAACTCACATCTTTAATATAACACATTCACTTTTTCTCACG	5206167	-	GeneID:57128	C6orf149	ISD11; CGI-203;	NM_020408.3	GI:38570053	mitochonrial matrix Nfs1 interacting protein; homolog of yeast Isd11	hypothetical protein LOC57128	968	FALSE
cg02968557	17	37528652	NCBI:RefSeq	36.1	CGTCCAGTTGCTGCTGTCCGGTCACCATCAGCCATTGGCCATCCACCTGC	37528395	+	GeneID:94086	HSPB9		NM_033194.1	GI:15082237	small heat shock protein B9; go_process: protein folding; go_process: response to unfolded protein	heat shock protein; alpha-crystallin-related; B9	257	TRUE	17:37527998-37528750
cg02973416	11	786069	NCBI:RefSeq	36.1	CCGAGGTGAAGGTTACGAGTCCCTGAGGATCTGTGGGTGTGAGCCAGCCG	786221	-	GeneID:79751	SLC25A22	GC1; FLJ13044;	NM_024698.4	GI:34222352	go_component: mitochondrion; go_component: integral to membrane; go_component: mitochondrial inner membrane; go_function: binding; go_function: symporter activity; go_function: carrier activity; go_function: L-glutamate transporter activity; go_process: transport; go_process: L-glutamate transport	mitochondrial glutamate carrier 1	152	FALSE
cg02975142	17	17081322	NCBI:RefSeq	36.1	CGCAAGCCCAGGAACACAGTCCGAGTCCTACAACTCCGAGGTCTGACTGG	17081221	-	GeneID:201163	FLCN	BHD; FLCL; MGC17998; MGC23445;	NM_144997.4	GI:51317377	isoform 1 is encoded by transcript variant 1	folliculin isoform 1	101	TRUE	17:17080727-17082557
cg02987051	18	42956543	NCBI:RefSeq	36.1	ATCGCAGTGCTGCACGAGGAGCGATTCCTCAAGAACAGTGAGTGGGACCG	42956712	-	GeneID:51124	IER3IP1	HSPC039; PRO2309;	NM_016097.2	GI:32261311	go_component: integral to membrane	immediate early response 3 interacting protein 1	169	TRUE	18:42955790-42957232
cg02990033	20	3591863	NCBI:RefSeq	36.1	CGGCTTGGGGACCCCTGGCAATTGACCCCACTATGTGCTGAGCACCTCAC	3592046	-	GeneID:64096	GFRA4		NM_022139.2	GI:22091446	isoform a precursor is encoded by transcript variant 1; GFR receptor alpha 4; persephin receptor; go_component: membrane; go_function: receptor activity	GDNF family receptor alpha 4 isoform a precursor	183	FALSE
cg02990612	8	11605426	NCBI:RefSeq	36.1	CGGGGTTTCAACAGGTTGGCCAGGATGGTCTCGATCTCCTGGCCCAGTCC		+	GeneID:2626	GATA4	9606;	NT_077531.3	GATA binding protein 4	GATA-binding protein 4; go_component: nucleus; go_component: nucleus; go_component: nucleus; go_function: DNA binding; go_function: protein binding; go_function: zinc ion binding; go_function: metal ion binding; go_function: sequence-specific DNA binding; go_function: transcription factor activity; go_function: transcription factor activity; go_function: transcriptional activator activity; go_fun…			TRUE	8:11605055-11605961
cg02998425	14	69993957	NCBI:RefSeq	36.1	CGACAGCTTCATAATGGCAGTGGATGGGACCCTCGTGTACATCAGAGTCA	69993970	+	GeneID:8747	ADAM21	ADAM31; MGC125389;	NM_003813.2	GI:15812182	a disintegrin and metalloproteinase domain 21; ADAM metallopeptidase domain 21; preproprotein; go_component: integral to membrane; go_function: zinc ion binding; go_function: metal ion binding; go_function: metalloendopeptidase activity; go_process: proteolysis; go_process: fertilization (sensu Metazoa)	ADAM metallopeptidase domain 21 preproprotein	13	FALSE
cg03001647	1	165958505	NCBI:RefSeq	36.1	CGCCAGAACCCTAGTTCCTGAGTCAGAATCCGGGAGGGCCTAGACGATCC	165957832	+	GeneID:9019	MPZL1	PZR; PZRa; PZRb; PZR1b; FLJ21047;	NM_003953.4	GI:46358424	isoform a is encoded by transcript variant 1; protein zero related; immunoglobulin family transmembrane protein; myelin protein zero-like protein MPZL1b; go_component: membrane; go_component: integral to plasma membrane; go_function: protein binding; go_function: protein binding; go_function: structural molecule activity; go_process: cell-cell signaling; go_process: transmembrane receptor protein…	myelin protein zero-like 1 isoform a	673	TRUE	1:165957422-165958611
cg03002480	15	41185630	NCBI:RefSeq	36.1	GAGAGACAGGGACGACACTTTTACGACGGCCCCTGAAGTCGGGTTTGACG	41185512	-	GeneID:197131	UBR1		NM_174916.1	GI:28372496	ubiquitin ligase E3 alpha-I; go_function: ligase activity; go_function: metal ion binding; go_function: ubiquitin-protein ligase activity; go_process: ubiquitin cycle	ubiquitin protein ligase E3 component n-recognin 1	118	TRUE	15:41185364-41185809
cg03003256	6	116956250	NCBI:RefSeq	36.1	AATAGGCAAGAACTGCCTTATGTAATCACTCACCCATTTGGTCTATTCCG	116956936	+	GeneID:221301	C6orf78	FLJ32239;	NM_153036.1	GI:23308562	go_component: integral to membrane	hypothetical protein LOC221301	686	FALSE
cg03003745	19	47640007	NCBI:RefSeq	36.1	TCCACAATCAACTCTGTGACAAGTCAACAGGCCGAGATAATTTGAAAACG	47638976	-	GeneID:284340	UNQ473	VCC1;	NM_198477.1	GI:38348269	VEGF co-regulated chemokine 1	DMC	1031	FALSE
cg03005055	14	64076704	NCBI:RefSeq	36.1	CTGAGGTTTTAAATGCAGTTCACTGCTAGGGTGCCGACTCACTGAGCACG		+	GeneID:3306	HSPA2	9606;	NT_026437.11	heat shock 70kDa protein 2	Heat-shock 70kD protein-2; heat shock 70kD protein 2; go_component: cell surface; go_function: ATP binding; go_function: nucleotide binding; go_function: unfolded protein binding; go_process: protein folding; go_process: male meiosis; go_process: spermatid development; go_process: response to unfolded protein			TRUE	14:64075878-64079365
cg03007010	19	40958680	NCBI:RefSeq	36.1	GAAGGACCCAGGAGCCTCAGGAGGCCCCTGCAGGGGCCACTTGGGTGGCG	40958316	+	GeneID:115703	SNX26	TCGAP; FLJ39019;	NM_052948.2	GI:23510412	go_function: GTPase activator activity; go_process: protein transport	sorting nexin 26	364	TRUE	19:40957326-40958975
cg03011500	1	149750867	NCBI:RefSeq	36.1	CGCTGGGAACAGCCTTCGCCCCAGGTGCCCCTCGCCTGGCACCTTCCTAG	149750500	+	GeneID:57530	CGN	KIAA1319;	NM_020770.1	GI:16262451	go_component: myosin; go_component: tight junction; go_function: actin binding; go_function: motor activity; go_function: protein binding; go_process: biological process unknown	cingulin	367	TRUE	1:149749916-149750891
cg03013422	12	124116303	NCBI:RefSeq	36.1	GCGGGAGCCGTGCAGGGTGGTTGGGTGGTCTCCCCATGGCTAGTTTCACG	124115960	+	GeneID:65985	AACS	SUR-5; FLJ12389;	NM_023928.2	GI:31982926	homolog of C. elegans supressor of ras 5 (sur-5); acetoacetate-CoA ligase; go_function: ligase activity; go_function: catalytic activity; go_function: CoA-ligase activity; go_function: acetoacetate-CoA ligase activity; go_process: metabolism; go_process: isoprenoid biosynthesis	acetoacetyl-CoA synthetase	343	TRUE	12:124115473-124116394
cg03014957	20	29419723	NCBI:RefSeq	36.1	CGGGGAGACACACAGATAAGTAGACCATTCAAAAGTAGGTTTATGCTAGA	29420089	+	GeneID:117285	DEFB118	ESC42; DEFB-18; C20orf63; dJ1018D12.3;	NM_054112.1	GI:16905372	defensin; beta 18; epididymus specific clone 42; go_process: spermatogenesis; go_process: cell-matrix adhesion; go_process: innate immune response; go_process: defense response to bacteria	defensin; beta 118	366	FALSE
cg03017653	1	229182494	NCBI:RefSeq	36.1	AGAATTGACAAACTGAGTGTATACCTGTATAATCTGCCAACCACATAACG	229181207	-	GeneID:79573	TTC13	FLJ22584;	NM_024525.2	GI:31377702	go_function: binding	tetratricopeptide repeat domain 13	1287	FALSE
cg03020271	19	4818550	NCBI:RefSeq	36.1	CGGCCCCTGGGGTGCCCCAGGACTCCATGGACACCGCCCCCCAGCTCAAC	4818676	-	GeneID:10226	M6PRBP1	PP17; TIP47; MGC2012; MGC11117;	NM_005817.3	GI:51317356	placental protein 17; cargo selection protein TIP47; MPR-binding protein 47 kDa; go_component: membrane; go_component: endosome; go_component: Golgi apparatus; go_process: vesicle-mediated transport	mannose 6 phosphate receptor binding protein 1	126	TRUE	19:4818467-4818927
cg03020951	6	34311865	NCBI:RefSeq	36.1	CGGAAGGGCCCAGGTCCCCAAGTGGGCCTGCGTATCTCCAGAACACCATC	34312628	+	GeneID:3159	HMGA1	HMG-R; HMGIY; MGC4242; MGC4854; MGC12816;	NM_145899.1	GI:22208966	isoform a is encoded by transcript variant 1; high-mobility group (nonhistone chromosomal) protein isoforms I and Y; nonhistone chromosomal high-mobility group protein HMG-I/HMG-Y; go_component: nucleus; go_component: chromatin; go_component: extracellular region; go_component: transcription factor complex; go_function: DNA binding; go_function: lipid binding; go_function: AT DNA binding; go_func…	high mobility group AT-hook 1 isoform a	763	TRUE	6:34310388-34314286
cg03029616	21	30907905	NCBI:RefSeq	36.1	CGGCTCTGGCTCTGGCTACTATTATTGAGGATGCCATGGGAGACTCTCAC	30908094	-	GeneID:337966	KRTAP6-1	KAP6.1; C21orf103;	NM_181602.1	GI:31791037	synonyms: KAP6.1; C21orf103	keratin associated protein 6-1	189	FALSE
cg03038672	16	3002057	NCBI:RefSeq	36.1	CGGGGGTTAAGTCCAGGGACTCAAGTGTCCCCAAGACCTGCCTTCCAGTT	3002207	+	GeneID:9080	CLDN9		NM_020982.2	GI:44680149	go_component: membrane; go_component: tight junction; go_component: integral to membrane; go_function: protein self binding; go_function: structural molecule activity; go_process: calcium-independent cell-cell adhesion	claudin 9	150	FALSE
cg03039172	19	50964993	NCBI:RefSeq	36.1	CTGTAGCCTGTCAGCGAGTCGGAGGACGAGGTCAATAAATATCCAAACCG	50964152	-	GeneID:147912	SIX5	DMAHP;	NM_175875.3	GI:40354215	DM locus-associated homeodomain protein; dystrophia myotonica-associated homeodomain protein; go_component: nucleus; go_function: transcription factor activity; go_process: development; go_process: regulation of transcription; DNA-dependent	sine oculis homeobox homolog 5	841	TRUE	19:50962515-50966234
cg03055440	11	59706981	NCBI:RefSeq	36.1	CGGCAAGGGAATAGTGAGATGAGAAAAGTCTTCCAGCATTACCTACCTGT	59707250	-	GeneID:64231	MS4A6A	CDA01; MS4A6; 4SPAN3; CD20L3; MST090; MSTP090; 4SPAN3.2; MGC22650; MGC131944;	NM_022349.2	GI:23238233	isoform 2 is encoded by transcript variant 2; CD20-like precusor; four-span transmembrane protein 3.2; MS4A6A-polymorph; four-span transmembrane protein 3.1; HAIRB-iso; membrane-spanning 4-domains; subfamily A; member 6A; isoform 2; go_component: integral to membrane; go_function: receptor activity; go_process: signal transduction	membrane-spanning 4-domains; subfamily A; member 6A isoform 2	269	FALSE
cg03063797	14	50205216	NCBI:RefSeq	36.1	TTCTTCCTAATGTTTCCTAGGCTGCTGAATTCAGCTCTCTAAAAAATGCG	50204773	-	GeneID:60485	SAV1	SAV; WW45; WWP4; salvador;	NM_021818.2	GI:18860913	1700040G09Rik; WW domain-containing gene; go_function: protein binding; go_process: signal transduction	WW45 protein	443	TRUE	14:50203755-50205223
cg03064241	12	120322111	NCBI:RefSeq	36.1	GCGACAGGGATTGGGCGGGGCCTCTGGCGTTCCTCCTGGCTGGGAGTGCG	120322285	+	GeneID:80196	RNF34	RFI; RIFF; FLJ21786;	NM_025126.2	GI:37595536	isoform 2 is encoded by transcript variant 2; RING finger protein RIFF; FYVE-RING finger protein MOMO; go_component: ubiquitin ligase complex; go_function: zinc ion binding; go_function: metal ion binding; go_function: ubiquitin-protein ligase activity; go_process: protein ubiquitination	ring finger protein 34 isoform 2	174	TRUE	12:120321661-120323138
cg03065661	11	93157061	NCBI:RefSeq	36.1	CGCTCTAGGGAACCCTGGAGCTTCCGCGCCTGCCCAGTTTTGCTCCGAAA	93157096	+	GeneID:9440	CRSP6	MED17; CRSP77; DRIP80; TRAP80; FLJ10812;	NM_004268.3	GI:28558974	cofactor required for Sp1 transcriptional activation; subunit 6 (77kD); thyroid hormone receptor-associated protein; 80-KD subunit; vitamin D receptor interacting protein 80-kD; go_component: nucleus; go_component: mediator complex; go_component: transcription factor complex; go_function: protein binding; go_function: receptor activity; go_function: vitamin D receptor binding; go_function: thyroi…	cofactor required for Sp1 transcriptional activation; subunit 6; 77kDa	35	TRUE	11:93156856-93158089
cg03066138	11	799697	NCBI:RefSeq	36.1	CATGCTGGGGGTGCTAGGTACCGAAGGCAGATGCCGTCCCTTTGGACTCG	799965	+	GeneID:6181	RPLP2	P2; RPP2; MGC71408; D11S2243E;	NM_001004.2	GI:16905512	60S acidic ribosomal protein P2; acidic ribosomal phosphoprotein P2; go_component: ribosome; go_component: cytosolic large ribosomal subunit (sensu Eukaryota); go_function: RNA binding; go_function: structural constituent of ribosome; go_process: protein biosynthesis; go_process: translational elongation	ribosomal protein P2	268	TRUE	11:799094-800873
cg03067226	12	6846594	NCBI:RefSeq	36.1	TGGTTTTCAAGCGGAACTAGCTGGTGGCAACTTGGCCGTAGCCCAGATCG	6846967	+	GeneID:7167	TPI1	TPI; MGC88108;	NM_000365.4	GI:52851446	go_function: isomerase activity; go_function: triose-phosphate isomerase activity; go_function: triose-phosphate isomerase activity; go_process: glycolysis; go_process: metabolism; go_process: gluconeogenesis; go_process: fatty acid biosynthesis; go_process: pentose-phosphate shunt	triosephosphate isomerase 1	373	TRUE	12:6846527-6847837
cg03072378	17	45401737	NCBI:RefSeq	36.1	CGGGCCCCCCAGCCAGCAGCCCCCACACTTAAGATCCCGGAGAAAGTGTC	45401551	+	GeneID:1748	DLX4	BP1; DLX7; DLX8; DLX9;	NM_001934.2	GI:20143959	isoform b is encoded by transcript variant 2; distal-less homeo box 9; beta protein 1; distal-less homeo box 7; go_component: nucleus; go_component: nucleus; go_function: transcription factor activity; go_function: transcription factor activity; go_function: transcription factor activity; go_process: development; go_process: regulation of transcription; DNA-dependent; go_process: regulation of tr…	distal-less homeobox 4 isoform b	186	TRUE	17:45400598-45402367
cg03073814	17	15843226	NCBI:RefSeq	36.1	CGGGAGCCTACAGTGAGTGATAGAAACGTGGAGTTCTTGATTATTTTACA	15843507	+	GeneID:54902	TTC19	FLJ20343; MGC19520; 2010204O13Rik;	NM_017775.2	GI:22547158	go_function: binding; go_function: protein binding	tetratricopeptide repeat domain 19	281	TRUE	17:15842749-15844576
cg03076871	20	56660143	NCBI:RefSeq	36.1	TAGGGGGCTTCAGGGCCTCCCAGTCTAGAGCCGGATTGGCGAGTTAGACG	56659734	+	GeneID:8675	STX16	SYN16; hsyn16; MGC90328;	NM_003763.3	GI:47778941	isoform b is encoded by transcript variant 2; go_component: membrane; go_component: Golgi stack; go_component: microsome; go_component: integral to membrane; go_function: t-SNARE activity; go_function: protein transporter activity; go_process: intra-Golgi transport; go_process: intracellular protein transport	syntaxin 16 isoform b	409	TRUE	20:56659998-56660396
cg03079549	15	43666515	NCBI:RefSeq	36.1	CGCGGCACAGCTTTTTAGTGTTGTCTCCGTGTTTAGGGAAAACCTTCAGA	43666709	+	GeneID:26258	PLDN	PA; PALLID;	NM_012388.2	GI:38505202	pallid (mouse) homolog; pallidin; syntaxin 13-interacting protein pallid; syntaxin 13 binding protein 1; go_component: membrane; go_function: syntaxin-13 binding; go_function: protein self binding; go_process: synaptic vesicle docking during exocytosis	pallidin	194	TRUE	15:43666348-43667372
cg03082060	1	234746847	NCBI:RefSeq	36.1	CGGCTGGGCTTAATTTTTTGGCCAGAAGACTTTACAGGTGATATGTAGCT	234748188	+	GeneID:3964	LGALS8	Gal-8; PCTA1; PCTA-1; Po66-CBP;	NM_006499.3	GI:42544184	isoform a is encoded by transcript variant 1; Po66 carbohydrate binding protein; prostate carcinoma tumor antigen 1; go_component: extracellular space; go_function: sugar binding; go_function: sugar binding	galectin 8 isoform a	1341	FALSE
cg03085377	13	47791377	NCBI:RefSeq	36.1	CCTTGGTGGCCACTGGCTTCCTCTAGCTGGGTGTTTTCCTGTGGGTCTCG		+	GeneID:5925	RB1	RB; OSRC;	NT_024524.13	retinoblastoma 1	retinoblastoma-1; retinoblastoma suspectibility protein; retinoblastoma susceptibility protein; go_component: nucleus; go_component: nucleus; go_component: chromatin; go_function: protein binding; go_function: protein binding; go_function: androgen receptor binding; go_function: transcription factor activity; go_function: transcription coactivator activity; go_process: M phase; go_process: G1 pha…			TRUE	13:47790461-47792049
cg03091512	2	227409294	NCBI:RefSeq	36.1	CGGCAACTTCGACAAGACCCCAGGTGGAGTTACCCCAGGAAACGCCCTCC	227409017	+	GeneID:84236	RHBDD1	MGC117258; DKFZp547E052;	NM_032276.2	GI:33300638	synonyms: MGC117258; DKFZp547E052	hypothetical protein LOC84236	277	TRUE	2:227408288-227409506
cg03103192	4	52612028	NCBI:RefSeq	36.1	GGCCCCTTTATTCTTTCGCCTTTCATTCCTTTAATTCTTCATTTGTAGCG	52612350	+	GeneID:132671	SPATA18	FLJ32906;	NM_145263.1	GI:21687118	synonym: FLJ32906	spermatogenesis associated 18 homolog	322	TRUE	4:52612015-52613199
cg03107405	2	3360948	NCBI:RefSeq	36.1	CGCCAAGTACATACAAATGACAATACATGGCGGCGCCCAACTACGGCGTG	3360605	-	GeneID:7260	TSSC1		NM_003310.1	GI:4507702	tumor-suppressing STF cDNA 1	tumor suppressing subtransferable candidate 1	343	TRUE	2:3360293-3361148
cg03109316	3	115440593	NCBI:RefSeq	36.1	CGGGGGCATGCAAACCACAGTTGACCTACTAGCTGAAGCAGTGATAAAAG	115439214	-	GeneID:7634	ZNF80	pT17;	NM_007136.1	GI:6005981	go_component: nucleus; go_function: zinc ion binding; go_function: metal ion binding; go_function: transcription factor activity; go_process: transcription; go_process: regulation of transcription; DNA-dependent	zinc finger protein 80 (pT17)	1379	FALSE
cg03116238	19	51829788	NCBI:RefSeq	36.1	CGCCGCAACCATGTCCAACAACATGGCCAAGATTGCCGAGGCCCGCAAGA	51829779	-	GeneID:94235	GNG8		NM_033258.1	GI:15147245	go_component: extracellular region; go_component: heterotrimeric G-protein complex; go_function: GTPase activity; go_function: signal transducer activity; go_process: signal transduction; go_process: G-protein coupled receptor protein signaling pathway	guanine nucleotide binding protein (G protein); gamma 8	9	TRUE	19:51829585-51830039
cg03125090	1	181872113	NCBI:RefSeq	36.1	CGCAGCCTCTAGCAGCGCACAGTCTGAGGCAATGTCTCCGGCAATTAGAA	181871608	-	GeneID:10092	ARPC5	ARC16; p16-Arc; dJ127C7.3;	NM_005717.2	GI:23238212	Arp2/3 protein complex subunit p16; actin related protein 2/3 complex; subunit 5 (16 kD); go_component: cytoskeleton; go_component: cytoplasm; go_component: Arp2/3 protein complex; go_function: structural constituent of cytoskeleton; go_process: cell motility; go_process: regulation of actin filament polymerization; go_process: actin cytoskeleton organization and biogenesis	actin related protein 2/3 complex subunit 5	505	TRUE	1:181870766-181872481
cg03132911	5	75734488	NCBI:RefSeq	36.1	CGTGAAATCTCCCCAGAGGAAAAGGAACCGCGCTGTTTGTCCCTCAGTAA	75734905	+	GeneID:10788	IQGAP2		NM_006633.1	GI:5729886	go_component: actin cytoskeleton; go_function: actin binding; go_function: calmodulin binding; go_function: GTPase inhibitor activity; go_function: Ras GTPase activator activity; go_process: signal transduction; go_process: small GTPase mediated signal transduction; go_process: negative regulation of Ras protein signal transduction	IQ motif containing GTPase activating protein 2	417	TRUE	5:75734453-75736042
cg03136712	5	140033252	NCBI:RefSeq	36.1	CGGGGCTCGCCGGCCCCCAAGTCGCCAGCCGCTTACCTCACAATCCCGCT	140033355	-	GeneID:373863	DND1	RBMS4; MGC34750;	NM_194249.1	GI:34740338	dead end protein; go_function: RNA binding; go_function: nucleotide binding; go_process: development	dead end homolog 1	103	TRUE	5:140032085-140033704
cg03140096	19	12905717	NCBI:RefSeq	36.1	GTGCTTCTGACCTTGAGATAATCAATTTTACCCCTCTGGTCAACCAGACG	12905522	-	GeneID:2193	FARSLA	FRSA; CML33; FARSL; PheHA;	NM_004461.1	GI:4758339	cytoplasmic beta; phenylalanine-tRNA synthetase alpha-subunit; phenylalanine-tRNA synthetase-like; go_component: cytoplasm; go_component: soluble fraction; go_function: ATP binding; go_function: ligase activity; go_function: nucleotide binding; go_function: phenylalanine-tRNA ligase activity; go_process: protein biosynthesis; go_process: phenylalanyl-tRNA aminoacylation	phenylalanine-tRNA synthetase-like protein	195	TRUE	19:12904937-12905838
cg03146158	15	57452437	NCBI:RefSeq	36.1	TCCAGCAGCTCCAAGCTTGTTGGCTACTACGGTTTCCCTGAGGAGTGACG	57452363	-	GeneID:4643	MYO1E	MYO1C; myosin; MGC104638;	NM_004998.2	GI:55956915	myosin-IC; go_component: myosin; go_function: ATP binding; go_function: actin binding; go_function: motor activity; go_function: calmodulin binding; go_function: catalytic activity; go_function: nucleotide binding; go_function: ATPase activity; coupled; go_function: microfilament motor activity; go_process: actin filament-based movement	myosin IE	74	TRUE	15:57450985-57452715
cg03148461	7	140271535	NCBI:RefSeq	36.1	CGGGGAAGCCAATACTACTTGCTATTTCCACTGCAATGAACGTCTCTGTG	140271033	-	GeneID:673	BRAF	BRAF1; RAFB1; B-raf 1; MGC126806; MGC138284;	NM_004333.2	GI:33188458	Murine sarcoma viral (v-raf) oncogene homolog B1; 94 kDa B-raf protein; go_function: ATP binding; go_function: zinc ion binding; go_function: metal ion binding; go_function: nucleotide binding; go_function: transferase activity; go_function: diacylglycerol binding; go_function: receptor signaling protein activity; go_function: protein serine/threonine kinase activity; go_process: anti-apoptosis; …	v-raf murine sarcoma viral oncogene homolog B1	502	TRUE	7:140270307-140271594
cg03152785	1	110555246	NCBI:RefSeq	36.1	GGGCTTGGTGCGGTCTTGGAGCCGGAGGGTGGCCCGTGTGAGCGCGAGCG	110555500	+	GeneID:3749	KCNC4	KV3.4; KSHIIIC; HKSHIIIC; MGC126818;	NM_004978.2	GI:24497461	isoform a is encoded by transcript variant 1; voltage-gated potassium channel protein KV3.4; go_component: membrane; go_component: membrane fraction; go_component: integral to membrane; go_component: voltage-gated potassium channel complex; go_component: voltage-gated potassium channel complex; go_function: protein binding; go_function: potassium ion binding; go_function: voltage-gated potassium …	Shaw-related voltage-gated potassium channel protein 4 isoform a	254	TRUE	1:110553667-110556441
cg03160309	1	184916703	NCBI:RefSeq	36.1	AGCGTCGTCACTAAAACATAAAACATGTCAGCCTTTCTTAACCTTACTCG	184916179	-	GeneID:5743	PTGS2	COX2; COX-2; PHS-2; PGG/HS; PGHS-2; hCox-2;	NM_000963.1	GI:4506264	prostaglandin G/H synthase and cyclooxygenase; cyclooxygenase 2b; go_component: nucleus; go_component: membrane; go_component: cytoplasm; go_component: cytoplasm; go_function: iron ion binding; go_function: metal ion binding; go_function: oxidoreductase activity; go_function: peroxidase activity; go_function: prostaglandin-endoperoxide synthase activity; go_function: oxidoreductase activity; acti…	prostaglandin-endoperoxide synthase 2 precursor	524	TRUE	1:184915751-184916808
cg03163246	4	75139887	NCBI:RefSeq	36.1	CGCCAAAGACAGCAGATGTTCTTTGGGACCGTATGGATAAAATAAGAGCC	75139974	-	GeneID:10895	PPBPL2		XM_926381.1	GI:88974977	Derived by automated computational analysis using gene prediction method: GNOMON.	DNA-binding protein amplifying expression of surfactant protein	87	FALSE
cg03165700	11	107598430	NCBI:RefSeq	36.1	TTGATCATGTTGTTACCCTCGGACGTAGCCCGGCTTGTATTGGGTAAGCG		+	GeneID:472	ATM	AT1; ATA; ATC; ATD; ATE; ATDC; TEL1; MGC74674; DKFZp781A0353;	NT_033899.7	ataxia telangiectasia mutated protein isoform 1	isoform 1 is encoded by transcript variant 1; AT protein; AT mutated; human phosphatidylinositol 3-kinase homolog; serine-protein kinase ATM; AT complementation group A; AT complementation group C; AT complementation group D; AT complementation group E; go_component: nucleus; go_component: intracellular; go_function: DNA binding; go_function: protein binding; go_function: transferase activity; go…			TRUE	11:107597886-107599428
cg03169715	16	67698295	NCBI:RefSeq	36.1	AAACTTTGAGGGGCTGCTGGTGTGCAGCGTCTCTCCCGCTGACAGGTGCG	67697661	+	GeneID:3038	HAS3		NM_005329.2	GI:20302152	isoform a is encoded by transcript variant 1; hyaluronic acid synthase 3; HA synthase 3; go_component: integral to plasma membrane; go_function: hyaluronan synthase activity; go_function: transferase activity; transferring glycosyl groups; go_process: carbohydrate metabolism	hyaluronan synthase 3 isoform a	634	TRUE	16:67696945-67698564
cg03173722	4	71806504	NCBI:RefSeq	36.1	TAATGAACTGAACTGAAAATTCAGGCTCATGTGACCAGCTGCTCTGAACG	71806560	+	GeneID:22902	RUFY3	RIPX; KIAA0871;	NM_014961.2	GI:41281576	isoform 2 is encoded by transcript variant 2; rap2 interacting protein x	rap2 interacting protein x isoform 2	56	FALSE
cg03184964	12	54870469	NCBI:RefSeq	36.1	CGGGGAAACCCCATTGGATTTCGAGTCCAACGCCTTAACCACTCGGCCAC	54869544	-	GeneID:6601	SMARCC2	Rsc8; BAF170; CRACC2;	NM_003075.2	GI:21237804	isoform a is encoded by transcript variant 1; mammalian chromatin remodeling complex BRG1-associated factor 170; chromatin remodeling complex BAF170 subunit; SWI3-like protein; SWI/SNF complex 170 kDa subunit; go_component: chromatin; go_component: SWI/SNF complex; go_component: transcriptional repressor complex; go_function: DNA binding; go_function: chromatin binding; go_function: protein bindi…	SWI/SNF-related matrix-associated actin-dependent regulator of chromatin c2 isoform a	925	TRUE	12:54868910-54870686
cg03188118	14	71469562	NCBI:RefSeq	36.1	CGGGCACCTGTCACGCATCTGAAATGGACAAGCACCCACACCCAGGAGAT	71469586	+	GeneID:9628	RGS6	GAP;	NM_004296.3	GI:31742475	regulator of G protein signaling 6; regulator of G protein signalling 6; G protein signaling 6 regulator; GTPase activating protein; H_DJ1108A12.1; WUGSC:H_DJ1108A12.1; H_DJ0283M22.1; WUGSC:H_DJ0283M22.1; go_component: heterotrimeric G-protein complex; go_function: signal transducer activity; go_function: GTPase activator activity; go_function: regulator of G-protein signaling activity; go_proces…	regulator of G-protein signalling 6	24	TRUE	14:71468315-71470088
cg03192551	17	39758678	NCBI:RefSeq	36.1	GCAGAGTCATTCCGGGCCTTAGGCGAGGTTGTGATTTGCCCAAGGTCACG	39757710	-	GeneID:51629	CGI-69		NM_016016.1	GI:7706305	go_component: mitochondrion; go_component: inner membrane; go_component: integral to membrane; go_function: binding; go_process: transport	hypothetical protein LOC51629	968	TRUE	17:39756526-39760418
cg03196745	12	107480242	NCBI:RefSeq	36.1	TCTGGTTGAGACAGGACCTCAGGGCTTCTGCAGTGTGGGGCTCAAGTTCG	107480512	+	GeneID:23479	NIFUN	ISCU; ISU2; NIFU; MGC74517; 2310020H20Rik;	NM_014301.2	GI:56699454	isoform ISCU1 is encoded by transcript variant 1; nitrogen fixation cluster-like; iron-sulfur cluster assembly enzyme; go_component: nucleus; go_component: mitochondrion; go_function: metal ion binding; go_function: iron ion binding; go_process: iron-sulfur cluster assembly	iron-sulfur cluster assembly enzyme isoform ISCU1	270	TRUE	12:107479895-107481051
cg03214697	22	29231532	NCBI:RefSeq	36.1	GGACCTGAGCCCCCAGCAGCAGGAAGCGCTGGCCAGGGTGAGGAGCATCG	29231682	-	GeneID:284904	SEC14L4	TAP3;	NM_174977.2	GI:30410718	go_component: membrane; go_component: intracellular; go_function: lipid binding; go_function: transporter activity; go_function: protein carrier activity; go_process: transport; go_process: intracellular protein transport	SEC14p-like protein TAP3	150	TRUE	22:29231498-29232326
cg03218909	1	154855632	NCBI:RefSeq	36.1	CTCACCCTATTCTCTTCTTCTTGGGGATGTCAATTCCTGTTCTGAGCCCG	154855710	+	GeneID:60484	HAPLN2	BRAL1;	NM_021817.2	GI:46852179	go_component: extracellular matrix (sensu Metazoa); go_function: hyaluronic acid binding; go_process: cell adhesion	brain link protein-1	78	FALSE
cg03221619	19	7673348	NCBI:RefSeq	36.1	CGGCCTGGAGTTGGGATCCTGCCACCCGGCACTTACCAGCAGACACCCCA	7672997	-	GeneID:2208	FCER2	CD23; FCE2; CD23A; IGEBF; CLEC4J;	NM_002002.3	GI:34147598	CD23 antigen; C-type lectin domain family 4; member J; go_component: integral to plasma membrane; go_function: IgE binding; go_function: sugar binding; go_function: receptor activity; go_function: integrin binding; go_function: receptor signaling protein activity	Fc fragment of IgE; low affinity II; receptor for (CD23A)	351	FALSE
cg03225779	9	115956789	NCBI:RefSeq	36.1	TGTAGAGTATCAGCGTGCGCCTGAGCCCAGATATCTGAGGATGCGTTTCG	115958052	+	GeneID:85301	COL27A1	FLJ11895; KIAA1870; MGC11337; RP11-82I1.1;	NM_032888.2	GI:32140759	go_component: collagen; go_component: cytoplasm; go_function: extracellular matrix structural constituent; go_process: cell adhesion; go_process: phosphate transport	collagen; type XXVII; alpha 1	1263	TRUE	9:115955983-115957125
cg03241282	3	199291888	NCBI:RefSeq	36.1	AGAGGCTGCGAGTGTCGCTGCTGAAGGCTGTGGTGGACCCGGCCGGGTCG	199291988	-	GeneID:348840	LOC348840		NM_182631.1	GI:32699069		hypothetical protein LOC348840	100	TRUE	3:199291287-199292456
cg03242666	17	15109295	NCBI:RefSeq	36.1	CGGGTCTCTGACTGCCCTGTGGGGAGGGTCTTGCCTTAACATCCCTTGCA	15109369	-	GeneID:5376	PMP22	DSS; HNPP; CMT1A; CMT1E; GAS-3; Sp110; MGC20769;	NM_000304.2	GI:24430161	growth arrest-specific 3; go_component: membrane; go_component: membrane fraction; go_component: integral to plasma membrane; go_process: mechanosensory behavior; go_process: synaptic transmission; go_process: sensory perception of sound; go_process: negative regulation of cell proliferation; go_process: peripheral nervous system development	peripheral myelin protein 22	74	FALSE
cg03242880	11	110888125	NCBI:RefSeq	36.1	CGGCTTCCCAGGTACCTCAAATTATAGGTTTGAATTTTCCAAATGGAGGT	110888274	-	GeneID:54766	BTG4	PC3B; MGC33003;	NM_017589.2	GI:28872723	go_component: cellular component unknown; go_process: cell cycle arrest; go_process: neuron differentiation; go_process: negative regulation of cell proliferation	B-cell translocation gene 4	149	FALSE
cg03243506	20	2465231	NCBI:RefSeq	36.1	CCTGGTGGCTCATGGTCAGCAGCACTGCTGGGGTCCTGCACAGGCTCACG	2465253	+	GeneID:117532	TMC2	C20orf145; dJ686C3.3;	NM_080751.1	GI:20304092	transmembrane; cochlear expressed; 2; go_component: membrane; go_component: integral to membrane	transmembrane cochlear-expressed protein 2	22	FALSE
cg03245962	3	143649747	NCBI:RefSeq	36.1	CCACTTCCAAATCCACTTAGAAAGCACAACTCTATCATGGGGCATTTTCG	143649543	-	GeneID:54464	XRN1	SEP1; DKFZp434P0721; DKFZp686B22225; DKFZp686F19113;	NM_019001.2	GI:40254886	strand-exchange protein 1; go_component: nucleus; go_function: protein binding; go_function: exonuclease activity	5prime-3 exoribonuclease 1	204	TRUE	3:143648766-143649879
cg03247626	6	126319486	NCBI:RefSeq	36.1	TTTGAAGAACGCCTGTCCAGAACACCCAACAAGCTCCATTATGTCAAACG	126319629	+	GeneID:135114	HINT3	HINT4; FLJ33126; MGC22976;	NM_138571.3	GI:21359981	HIT-like protein	histidine triad nucleotide binding protein 3	143	TRUE	6:126319375-126320286
cg03260744	1	36321649	NCBI:RefSeq	36.1	CGAGGTCAGCCTCAGAAACATAGTAGTTGCCAGCAAACGAACAGTACATA	36322263	+	GeneID:27285	TEKT2	TEKTB1; h-tektin-t;	NM_014466.2	GI:16507949	testicular tektin B1-like protein; go_component: microtubule; go_function: structural molecule activity; go_process: microtubule cytoskeleton organization and biogenesis	tektin 2	614	TRUE	1:36321540-36322620
cg03266904	7	134845225	NCBI:RefSeq	36.1	TCTGAAGAGTTTTTTCCCCGACGCTCGTTCGGTGGTTTCTTGTGAGGACG	134845391	-	GeneID:4850	CNOT4	NOT4; NOT4H; CLONE243;	NM_013316.2	GI:56550056	isoform a is encoded by transcript variant 1; NOT4 (negative regulator of transcription 4; yeast) homolog; go_component: nucleus; go_component: ubiquitin ligase complex; go_function: RNA binding; go_function: ligase activity; go_function: zinc ion binding; go_function: metal ion binding; go_function: nucleotide binding; go_function: ubiquitin-protein ligase activity; go_process: transcription; go…	CCR4-NOT transcription complex; subunit 4 isoform a	166	TRUE	7:134844835-134846009
cg03271907	10	131302633	NCBI:RefSeq	36.1	GATCGTCACAAGCCGTCTAAGACACGTGGTCTAGGGTTTGCTAGTGATCG		+	GeneID:4255	MGMT	9606;	NT_008818.15	O-6-methylguanine-DNA methyltransferase	Methylguanine-DNA methyltransferase; O6-methylguanine-DNA methyltransferase; go_component: nucleus; go_function: DNA binding; go_function: transferase activity; go_function: DNA-methyltransferase activity; go_function: methylated-DNA-[protein]-cysteine S-methyltransferase activity; go_process: DNA repair; go_process: DNA ligation			TRUE	10:131302456-131302963
cg03274876	4	170915581	NCBI:RefSeq	36.1	GAATTCTGCTGGCGCTGCAGCTGCAGAATGGTCGGCGGTGGCGGGAAGCG	170915623	-	GeneID:54969	FLJ20534		NM_017867.1	GI:8923502		hypothetical protein LOC54969	42	TRUE	4:170915361-170915947
cg03276813	2	182465402	NCBI:RefSeq	36.1	CGAGGCGCCCCCAGCGTCAACACAGACAACTGGGTGCCATCCGATTTCCC	182464927	+	GeneID:6744	SSFA2	CS1; CS-1; KRAP; SPAG13; KIAA1927; DKFZp779G0129;	NM_006751.3	GI:34222128	go_component: plasma membrane	sperm specific antigen 2	475	TRUE	2:182464416-182465904
cg03283569	9	127003002	NCBI:RefSeq	36.1	CGGCCTAGGCCACTGACAGCTGTCCCCAAAGTCCAGAGCTCAGTTAGGCT	127002874	+	GeneID:10244	RABEPK	p40; RAB9P40; bA65N13.1; DKFZp686P1077;	NM_005833.2	GI:33695108	go_component: endosome; go_process: receptor mediated endocytosis; go_process: vesicle docking during exocytosis	Rab9 effector p40	128	TRUE	9:127001366-127003024
cg03283842	2	179052049	NCBI:RefSeq	36.1	AGCGCATTCTCAGGTCGGAATCTTGCATTCAGAGGTTCCAGGCTGAGTCG	179051568	-	GeneID:51661	FKBP7	FKBP23; PPIase; MGC9420;	NM_181342.1	GI:31317230	isoform 2 precursor is encoded by transcript variant 2; FK506-binding protein; FK506-binding protein 7; peptidyl-prolyl cis-trans isomerase; rotamase; go_component: endoplasmic reticulum; go_function: isomerase activity; go_function: calcium ion binding; go_function: peptidyl-prolyl cis-trans isomerase activity; go_process: protein folding	FK506-binding protein 7 isoform 2 precursor	481	TRUE	2:179051153-179052346
cg03289369	4	56948572	NCBI:RefSeq	36.1	CGCGACCCCAAGGAGCGCCTGAGCAGATAACCAAAAGTGAAAAAGCCTAT	56948395	-	GeneID:132949	AASDH	NRPS998; NRPS1098;	NM_181806.2	GI:45580729	non-ribosomal peptide synthetase 998; non-ribosomal peptide synthetase 1098; go_function: cofactor binding; go_function: catalytic activity; go_process: metabolism; go_process: electron transport	2-aminoadipic 6-semialdehyde dehydrogenase	177	TRUE	4:56947957-56948693
cg03294491	18	43712241	NCBI:RefSeq	36.1	GCCTTGCTGCCTCCTGTAGGGCAGATGTGCAAGTTGGGGCCTAATCGTCG	43711221	-	GeneID:4087	SMAD2	JV18; MADH2; MADR2; JV18-1; hMAD-2; hSMAD2; MGC22139; MGC34440;	NM_005901.3	GI:51173728	Mad-related protein 2; Mad; mothers against decapentaplegic homolog 2 (Drosophila); Mad protein homolog; mother against DPP homolog 2; go_component: nucleus; go_component: transcription factor complex; go_function: double-stranded DNA binding; go_function: transcription factor binding; go_function: transcriptional activator activity; go_process: transcription; go_process: mesoderm formation; go_p…	Sma- and Mad-related protein 2	1020	FALSE
cg03294557	18	59463457	NCBI:RefSeq	36.1	TAAGAATAACTTTTGCCTCCTACTGTGATTCTGAGGCCTCCCCAATCACG	59462470	-	GeneID:6318	SERPINB4	PI11; SCCA1; SCCA2; LEUPIN; SCCA-2;	NM_002974.1	GI:28076868	squamous cell carcinoma antigen 2; protease inhibitor (leucine-serpin); squamous cell carcinoma antigen 1; SCCA2/SCCA1 fusion protein isoform 2; go_component: cytoplasm; go_function: serine-type endopeptidase inhibitor activity; go_function: serine-type endopeptidase inhibitor activity; go_process: immune response; go_process: regulation of proteolysis	serine (or cysteine) proteinase inhibitor; clade B (ovalbumin); member 4	987	FALSE
cg03311036	7	142695565	NCBI:RefSeq	36.1	CGCCTGCGCCTGCGCCCTGCCGCGCCCACACACCAGGCCACCCAGTCCCC	142695524	+	GeneID:835	CASP2	ICH1; NEDD2; CASP-2; ICH-1L; ICH-1L/1S;	NM_001224.3	GI:39995057	isoform 2 precursor is encoded by transcript variant 2; caspase 2; apoptosis-related cysteine protease (neural precursor cell expressed; developmentally down-regulated 2); ICH-1 protease; NEDD2 apoptosis regulatory gene; go_component: intracellular; go_function: protein binding; go_function: enzyme binding; go_function: caspase activity; go_function: caspase activity; go_function: cysteine-type p…	caspase 2 isoform 2 precursor	41	TRUE	7:142694976-142696096
cg03312124	17	30440116	NCBI:RefSeq	36.1	GTCGGGTGCCGTCAGGCTGTGGTCTGGGGGCCCTTCCTCTGTGTGGGGCG	30440407	-	GeneID:117584	RFFL	RNF189; RNF34L;	NM_057178.3	GI:62865647	fring; FYVE-RING finger protein SAKURA; go_component: membrane; go_component: ubiquitin ligase complex; go_function: DNA binding; go_function: zinc ion binding; go_function: metal ion binding; go_function: ubiquitin-protein ligase activity; go_process: apoptosis; go_process: protein ubiquitination	rififylin	291	TRUE	17:30439547-30440861
cg03317245	17	3547263	NCBI:RefSeq	36.1	CGCACTCTCCAGGCATATTTTTAGGATCCTAGGGTGGGTTGCCTGTGTCT	3546332	-	GeneID:5026	P2RX5	P2X5; P2X5R; MGC47755;	NM_002561.2	GI:28416932	isoform A is encoded by transcript variant 1; P2X purinoceptor 5; ionotropic ATP receptor P2X5; ATP receptor subunit; purinergic receptor P2X ligand-gated ion channel 5 transcript variant 1; go_component: membrane; go_function: ATP binding; go_function: receptor activity; go_function: ion channel activity; go_process: ion transport	purinergic receptor P2X5 isoform A	931	FALSE
cg03332970	11	124137762	NCBI:RefSeq	36.1	TTGGGGACTATCCGAAGTCAGAACCACCCGTAACACCTGACATGTAAACG	124137387	-	GeneID:90952	ESAM	W117m;	NM_138961.1	GI:20452463	2310008D05Rik; HUEL (C4orf1)-interacting protein; go_component: membrane; go_component: integral to membrane; go_function: protein binding; go_process: cell adhesion	endothelial cell adhesion molecule	375	TRUE	11:124137119-124138590
cg03336167	11	2887571	NCBI:RefSeq	36.1	GGTGGGGGCCGGGGCGGAGTCTGTGGGTCAGGACGCCCGCGGCTGGGTCG		+	GeneID:5002	SLC22A18	HET; ITM; BWR1A; IMPT1; TSSC5; ORCTL2; BWSCR1A; SLC22A1L; p45-BWR1A; DKFZp667A184;	NT_009237.17	tumor suppressing subtransferable candidate 5	organic cation transporter-like 2; solute carrier family 22 (organic cation transporter); member 1-like; Beckwith-Wiedemann syndrome chromosome region 1; candidate A; p45 Beckwith-Wiedemann region 1A; efflux transporter-like protein; tumor-suppressing STF cDNA 5; imprinted multi-membrane spanning polyspecific transporter-related protein; go_component: plasma membrane; go_component: integral to me…			TRUE	11:2886834-2887801
cg03338959	7	105713541	NCBI:RefSeq	36.1	CGGGCCAAGCCTTTGACAGGGTGCGACACTGACTTTTATCATCGTTATAG	105712603	-	GeneID:10135	PBEF1	PBEF; MGC117256;	NM_182790.1	GI:33386694	isoform b is encoded by transcript variant 2; pre-B-cell colony-enhancing factor; 1110035O14Rik; H_NH0022N19_gi18089094.sp_cds.1; go_function: cytokine activity; go_function: nicotinate phosphoribosyltransferase activity; go_function: nicotinamide phosphoribosyltransferase activity; go_function: transferase activity; transferring glycosyl groups; go_process: cell-cell signaling; go_process: signa…	pre-B-cell colony enhancing factor 1 isoform b	938	TRUE	7:105711734-105713580
cg03349251	6	10940458	NCBI:RefSeq	36.1	TTCTAAATCCTTTGTTCTTGACTGGGCACTGGTTCATGCCTGTAATCCCG	10939096	-	GeneID:4117	MAK	dJ417M14.2;	NM_005906.3	GI:31652253	serine/threonine protein kinase MAK; go_function: ATP binding; go_function: nucleotide binding; go_function: transferase activity; go_function: protein-tyrosine kinase activity; go_function: protein serine/threonine kinase activity; go_process: spermatogenesis; go_process: cell differentiation; go_process: protein amino acid phosphorylation	male germ cell-associated kinase	1362	FALSE
cg03352153	6	64088388	NCBI:RefSeq	36.1	CGGAGAATTGGAAAAGCTAAAGAAAGATATTTCAGTTTTATAATGAAGGT	64087841	-	GeneID:51557	GLULD1	LGS;	NM_016571.1	GI:7705581	lengsin; go_function: glutamate-ammonia ligase activity; go_process: glutamine biosynthesis; go_process: nitrogen compound metabolism	glutamate-ammonia ligase (glutamine synthase) domain containing 1	547	FALSE
cg03354772	10	134606493	NCBI:RefSeq	36.1	CATTCAGTCAGTCAGTCAGTCAGTCAGTCAGTCATTCCTTCATTCTTTCG	134606054	-	GeneID:255352	C10orf93	bB137A17.3; RP13-137A17.3;	NM_173572.1	GI:27734836	synonyms: bB137A17.3; RP13-137A17.3	hypothetical protein LOC255352	439	TRUE	10:134605528-134606974
cg03362494	3	197423065	NCBI:RefSeq	36.1	AACCCCATCTCCACTAAACATACAAAACTAGCCAGGAGTGGTGGTGCACG	197422697	-	GeneID:131540	ZDHHC19	MGC33345;	NM_144637.2	GI:34222165	go_component: integral to membrane; go_function: metal ion binding	zinc finger; DHHC domain containing 19	368	FALSE
cg03367667	9	35093545	NCBI:RefSeq	36.1	CGGGACTACCAGAGAATATCACTATGGCAACCATGGCAACGAGTCAGCTC	35093154	-	GeneID:30968	STOML2	SLP-2; HSPC108;	NM_013442.1	GI:7305502	stomatin-like protein 2; stomatin-like 2; go_component: membrane; go_component: cytoskeleton; go_function: receptor binding	stomatin (EPB72)-like 2	391	TRUE	9:35092588-35093583
cg03369671	2	231771420	NCBI:RefSeq	36.1	GTGAGGGTCCACAGCCCAGCAGTGGTGAAGGTTCACGCGCTGGATGACCG	231771623	+	GeneID:80210	ARMC9	ARM; FLJ12584;	NM_025139.2	GI:29336082	armadillo/beta-catenin-like repeats; melanoma/melanocyte specific protein KU-MEL-1; go_function: binding	hypothetical protein ARM	203	TRUE	2:231771139-231772168
cg03375002	7	73261812	NCBI:RefSeq	36.1	TTGTGTCTCTCTGCTGTGTCTCTCTCTTTTTCTTTCTGTTTTTTGAGACG	73262211	+	GeneID:7462	LAT2	LAB; NTAL; WSCR5; WBSCR5; HSPC046; WBSCR15;	NM_014146.2	GI:14702181	isoform 1 is encoded by transcript variant 3; Williams-Beuren syndrome chromosome region 15; linker for activation of B cells; non-T cell activation linker; Williams-Beuren syndrome chromosome region 5; go_component: lipid raft; go_function: protein binding; go_function: SH2 domain binding; go_process: B cell activation; go_process: calcium-mediated signaling; go_process: intracellular signaling …	linker for activation of T cells family member 2 isoform 1	399	FALSE
cg03375833	3	9834360	NCBI:RefSeq	36.1	CGGCAAATTCCGGAGATTGAGACATAGACCCACCTACGGAGTTAGCCACT	9835061	+	GeneID:26140	TTLL3	HOTTL; FLJ13898; MGC120529; MGC120532; DKFZP434B103;	NM_015644.2	GI:51036591	isoform 2 is encoded by transcript variant 2; go_component: cytoskeleton; go_function: ligase activity; go_function: tubulin-tyrosine ligase activity; go_process: protein modification; go_process: actin filament polymerization	tubulin tyrosine ligase-like family; member 3 isoform 2	701	FALSE
cg03382304	21	25934047	NCBI:RefSeq	36.1	GGGTAGAGGAACCCGAGCAACTTACAGCCCAGGGCGACCACCAGGTAGCG	25933460	+	GeneID:58494	JAM2	JAMB; CD322; JAM-B; VEJAM; PRO245; VE-JAM; C21orf43;	NM_021219.2	GI:21704284	vascular endothelial junction-associated molecule; junctional adhesion molecule B; JAM-IT/VE-JAM; go_component: membrane; go_component: tight junction; go_component: integral to plasma membrane; go_process: cell-cell adhesion	junctional adhesion molecule 2 precursor	587	TRUE	21:25933195-25934679
cg03382346	19	57925057	NCBI:RefSeq	36.1	CGAAGGACAATGCATATATACAAAATTGCTGTATTGCCTGGTGATATGCA	57924947	-	GeneID:81856	ZNF611	MGC5384;	NM_030972.2	GI:39204783	go_component: nucleus; go_function: zinc ion binding; go_function: nucleic acid binding; go_process: regulation of transcription; DNA-dependent	zinc finger protein 611	110	FALSE
cg03386140	1	211255813	NCBI:RefSeq	36.1	CGCAGTCAGAGTCCCTGAATGCCTTAACCCGGAATTCTGCTCAAGGAGCA	211255791	-	GeneID:90806	ANGEL2	FLJ12793; KIAA0759L;	NM_144567.3	GI:70794817	synonyms: FLJ12793; KIAA0759L	LOC90806 protein	22	TRUE	1:211255018-211255969
cg03387497	20	17628945	NCBI:RefSeq	36.1	CGGCTTGCCACCTGCACCAGCTCCCTGGGCAAAGGTCACCTGTGTTCTTA	17628593	+	GeneID:140836	C20orf179	MGC62093; MGC72082;	NM_001014977.1	GI:62510080	go_component: nucleus; go_function: DNA binding	hypothetical protein LOC140836	352	FALSE
cg03388193	10	100986060	NCBI:RefSeq	36.1	ACCATGCCGTTGTACCGTCTGGGTACAGAGCAAAGGGTCTCGTTTTTACG	100985609	-	GeneID:60495	HPSE2	HPA2; HPR2;	NM_021828.2	GI:40254951	heparanase-like protein; heparanase 3; go_component: intracellular; go_function: heparanase activity; go_process: biological process unknown	heparanase 2	451	TRUE	10:100985526-100986619
cg03389164	14	93493625	NCBI:RefSeq	36.1	CGTCACACAGCCAAGGAGTGCCAGAGCCCAGATGTGAACCTGTGTCTGTC	93493520	-	GeneID:51676	ASB2	ASB-2; MGC40044;	NM_016150.3	GI:22208962	ankyrin repeat-containing protein ASB-2; ankyrin repeat and SOCS box-2 containing protein; go_process: intracellular signaling cascade	ankyrin repeat and SOCS box-containing protein 2	105	FALSE
cg03395546	19	45914439	NCBI:RefSeq	36.1	CGGACTTTCAAAGACTTGGAGTTCCCACGGGTGTGGGTTCGAGACCTTCC	45914440	-	GeneID:79934	ADCK4	FLJ12229;	NM_024876.2	GI:21361994	synonym: FLJ12229	aarF domain containing kinase 4	1	TRUE	19:45914253-45915371
cg03396229	8	139995753	NCBI:RefSeq	36.1	CGAGGTGGCCCTGGGAAGCCCAAAAGAGGGGCTGACAACTTTCTGTCCAA	139995418	-	GeneID:169044	COL22A1		NM_152888.1	GI:40805822	go_component: cytoplasm; go_process: phosphate transport	collagen; type XXII; alpha 1	335	TRUE	8:139995363-139995794
cg03399971	12	56115114	NCBI:RefSeq	36.1	CGCCCAACACTGAACCGCCCTGTGTCCAGAGCTGCTTTGAGGACTGCACT	56114810	+	GeneID:3626	INHBC	IHBC;	NM_005538.2	GI:15718678	activin beta-C chain; go_component: extracellular region; go_function: hormone activity; go_function: growth factor activity; go_function: transforming growth factor beta receptor binding	inhibin beta C chain preproprotein	304	FALSE
cg03400060	5	78401557	NCBI:RefSeq	36.1	CGCTAACCAACCCGTGACAGGGGAAAATTGAGGCTCAGGGCCATCCCGTC	78401339	+	GeneID:23743	BHMT2	FLJ20001;	NM_017614.3	GI:20544175	go_function: transferase activity; go_function: methyltransferase activity; go_function: homocysteine S-methyltransferase activity	betaine-homocysteine methyltransferase 2	218	TRUE	5:78400911-78401992
cg03406535	1	9979544	NCBI:RefSeq	36.1	CGTTGAGAGGTATATTGTTATTGAAGCTGACAATATTCAATGCCATGAGT	9979861	+	GeneID:116362	RBP7	CRBP4; CRBPIV; MGC70641;	NM_052960.1	GI:16418454	putative cellular retinol-binding protein CRBP IV; retinoid binding protein 7; go_function: lipid binding; go_function: retinal binding; go_function: retinol binding; go_process: transport	retinol binding protein 7; cellular	317	FALSE
cg03410718	19	598423	NCBI:RefSeq	36.1	CGCCTCCTGCAGGGCTTGGCACCCAGGGCCGGCTAGCAAAACTGCTCTCC	598309	-	GeneID:400666	FLJ45684		NM_207462.1	GI:46409551		hypothetical protein LOC400666	114	TRUE	19:597206-599647
cg03417466	11	88550066	NCBI:RefSeq	36.1	CGTGAGATATCCCCACAATGAAGCAAATCGCCCAGTTATCAAAGTGAGCT	88550688	+	GeneID:7299	TYR	OCA1A; OCAIA; tyrosinase;	NM_000372.3	GI:53850570	go_component: Golgi vesicle; go_component: integral to membrane; go_function: metal ion binding; go_function: copper ion binding; go_function: monooxygenase activity; go_function: monophenol monooxygenase activity; go_process: metabolism; go_process: visual perception; go_process: sensory perception of sound; go_process: eye pigment biosynthesis; go_process: melanin biosynthesis from tyrosine	tyrosinase (oculocutaneous albinism IA)	622	FALSE
cg03422350	6	40003649	NCBI:RefSeq	36.1	CGGATCAGACTAGATCAGACTTGTACATGGGAAAGAGTGAAGCCGGCTCC	40003433	-	GeneID:4337	MOCS1	MIG11; MOCOD; MOCS1A; MOCS1B; KIAA0381;	NM_138928.1	GI:22027531	MOCS1A-MOCS1B open reading frame isoform 3 is encoded by transcript variant 3; MOCS1A enzyme; migration-inducing gene 11 protein; go_component: nucleus; go_component: molybdopterin synthase complex; go_function: iron ion binding; go_function: metal ion binding; go_function: catalytic activity; go_function: molybdenum ion binding; go_function: 4 iron; 4 sulfur cluster binding; go_process: Mo-molyb…	molybdenum cofactor synthesis-step 1 protein isoform 3	216	FALSE
cg03424436	20	33507078	NCBI:RefSeq	36.1	CGGAATGATCACAAATTGTCAGGTGCTACTGAATGCATTACACATAAGGG	33506564	+	GeneID:11190	CEP250	CEP2; C-NAP1; MGC88542;	NM_007186.2	GI:21735547	isoform 1 is encoded by transcript variant 1; centrosome associated protein; centrosomal Nek2-associated protein 1; centrosomal protein; 250-KD; go_component: centrosome; go_function: protein kinase binding; go_process: mitotic cell cycle; go_process: regulation of centriole-centriole cohesion	centrosomal protein 2 isoform 1	514	TRUE	20:33506254-33507521
cg03426225	18	10687032	NCBI:RefSeq	36.1	GGGCGCTCAGACTTGGAGTGCTTGGTCCATGCGCGTTTGAATGTGCAACG	10687814	-	GeneID:63895	FAM38B	HsT748; FLJ23144; FLJ23403;	NM_022068.1	GI:13384601	synonyms: HsT748; FLJ23144; FLJ23403	hypothetical protein LOC63895	782	FALSE
cg03427831	1	11790040	NCBI:RefSeq	36.1	CGTGTAAAAACACCAGACCTTGTTTTGGGGTTAAGGTGAGAAAAGGGCTT	11788569	-	GeneID:4524	MTHFR	9606;	NM_005957.2	GI:40254828	Methylenetetrahydrofolate reductase; methylenetetrahydrofolate reductase intermediate form; go_function: protein binding; go_function: oxidoreductase activity; go_function: methylenetetrahydrofolate reductase (NADPH) activity; go_function: methylenetetrahydrofolate reductase (NADPH) activity; go_process: circulation; go_process: methionine metabolism; go_process: amino acid metabolism	5;10-methylenetetrahydrofolate reductase (NADPH)	1471	FALSE
cg03429034	7	99451041	NCBI:RefSeq	36.1	CGCCTGCCCTTGAGTTTTCAAGCCTCCAGCTTGGAGGATCAGGTCCCAGT	99451155	+	GeneID:7586	ZKSCAN1	KOX18; ZNF36; PHZ-37; ZNF139; 9130423L19Rik;	NM_003439.1	GI:55769563	zinc finger protein 139; zinc finger protein 36 (KOX 18); go_component: nucleus; go_component: nucleus; go_function: zinc ion binding; go_function: metal ion binding; go_function: nucleic acid binding; go_function: transcription factor activity; go_function: transcription factor activity; go_process: transcription; go_process: regulation of transcription; DNA-dependent; go_process: regulation of …	zinc finger protein 36	114	TRUE	7:99450912-99451875
cg03439805	12	107648872	NCBI:RefSeq	36.1	GCGAGGCGTAGAGCCCGGGGGCTCCAGGCCTGGGGACTGGGTTTGGGCCG	107649424	-	GeneID:23603	CORO1C	HCRNN4; coronin-3;	NM_014325.2	GI:27477119	coronin; actin-binding protein; 1C; coronin 1C; go_component: actin cytoskeleton; go_function: actin binding; go_process: phagocytosis; go_process: signal transduction	coronin; actin binding protein; 1C	552	TRUE	12:107648175-107650252
cg03455024	16	55456684	NCBI:RefSeq	36.1	CGCCACTTTGTGCAGCGGGCGCTTCACCATCAGCACACTGCTGAGCAGTG	55456643	+	GeneID:6559	SLC12A3	TSC; NCCT;	NM_000339.1	GI:4506976	thiazide-sensitive Na-Cl cotransporter; go_component: membrane; go_component: membrane fraction; go_component: integral to plasma membrane; go_function: sodium ion binding; go_function: symporter activity; go_function: transporter activity; go_function: sodium:chloride symporter activity; go_function: amino acid-polyamine transporter activity; go_process: ion transport; go_process: chloride trans…	solute carrier family 12 (sodium/chloride transporters); member 3	41	FALSE
cg03459809	1	224079633	NCBI:RefSeq	36.1	CGGCCTTCTGACAATTGCACAGTCCTGCCAAGTCAGCCAATCTCATGTGT	224079599	+	GeneID:2052	EPHX1	MEH; EPHX; EPOX;	NM_000120.2	GI:4557560	Epoxide hydroxylase 1; microsomal (xenobiotic); go_component: membrane; go_component: microsome; go_component: integral to membrane; go_component: endoplasmic reticulum; go_function: hydrolase activity; go_function: epoxide hydrolase activity; go_function: epoxide hydrolase activity; go_process: response to toxin; go_process: xenobiotic metabolism; go_process: aromatic compound catabolism	epoxide hydrolase 1; microsomal (xenobiotic)	34	FALSE
cg03462055	6	3172555	NCBI:RefSeq	36.1	CTGGCCGCTTTGTGCCGCCGAGTGTGGCCTGGGCTAGGAGGTGACTTTCG	3172870	-	GeneID:347733	TUBB2B	MGC8685; bA506K6.1; DKFZp566F223; RP11-506K6.1; TUBB-PARALOG;	NM_178012.3	GI:42476191	go_component: cytoplasm; go_component: microtubule; go_component: protein complex; go_function: GTP binding; go_function: GTPase activity; go_function: nucleotide binding; go_function: structural molecule activity; go_process: protein polymerization; go_process: microtubule-based movement	tubulin; beta polypeptide paralog	315	TRUE	6:3171849-3175236
cg03469082	4	45821205	NCBI:RefSeq	36.1	GAGAGACCCGTGGGAAGCAGGCAGTGCCTAATTGGTTTTCCCCAGGTTCG	45820839	-	GeneID:2565	GABRG1	MGC33838; DKFZp686H2042;	NM_173536.3	GI:59889570	gamma-1 polypeptide; go_component: integral to membrane; go_component: postsynaptic membrane; go_function: ion channel activity; go_function: GABA-A receptor activity; go_function: neurotransmitter receptor activity; go_function: extracellular ligand-gated ion channel activity; go_process: ion transport; go_process: chloride transport; go_process: gamma-aminobutyric acid signaling pathway	gamma-aminobutyric acid A receptor; gamma 1 precursor	366	FALSE
cg03469158	11	102100305	NCBI:RefSeq	36.1	CGGCAAAGAAAATGCCTGTATGGAAGCACCAGACATATAGTAACTTGATT	102100868	-	GeneID:4317	MMP8	HNC; CLG1; PMNL-CL;	NM_002424.1	GI:4505220	PMNL collagenase; matrix metalloproteinase 8 (neutrophil collagenase); neutrophil collagenase; go_component: extracellular space; go_component: extracellular matrix (sensu Metazoa); go_function: calcium ion binding; go_function: zinc ion binding; go_function: metalloendopeptidase activity; go_function: neutrophil collagenase activity; go_process: proteolysis; go_process: collagen catabolism; go_p…	matrix metalloproteinase 8 preproprotein	563	FALSE
cg03473294	20	13567704	NCBI:RefSeq	36.1	CGGCTCACCTGGCCTCAGAGGTGCAGCGCTAACTCCACCTGGGGCTTCGT	13567550	-	GeneID:55617	TASP1	C20orf13; FLJ20212; dJ585I14.2;	NM_017714.1	GI:8923201	threonine aspartase 1; go_function: peptidase activity; go_function: asparaginase activity; go_function: threonine endopeptidase activity; go_process: glycoprotein catabolism	taspase 1	154	TRUE	20:13567097-13567893
cg03474731	11	125000444	NCBI:RefSeq	36.1	AAAAGGCAAAACTGGTTATCCTGACTTCAAGCTCCAACATAAACTGCTCG	125001547	+	GeneID:1111	CHEK1	CHK1;	NM_001274.2	GI:20127419	Checkpoint; S. pombe; homolog of; 1; CHK1 (checkpoint; S.pombe) homolog; go_component: nucleus; go_component: condensed nuclear chromosome; go_function: ATP binding; go_function: nucleotide binding; go_function: transferase activity; go_function: protein serine/threonine kinase activity; go_process: DNA repair; go_process: cell cycle; go_process: gametogenesis; go_process: DNA damage checkpoint; …	CHK1 checkpoint homolog	1103	TRUE	11:125000325-125001341
cg03476195	4	114190194	NCBI:RefSeq	36.1	CGGTGACGTTGCCATGGCAGCAGCTGCCACAACTGTTTATCTGACTGCAT	114190319	+	GeneID:287	ANK2	LQT4; DKFZp686P0948; DKFZp686M09125;	NM_001148.3	GI:52426734	isoform 1 is encoded by transcript variant 1; ankyrin; nonerythroid; ankyrin-2; nonerythrocytic; ankyrin; brain; brank-2; long QT syndrome-4; ankyrin B; long (electrocardiographic) QT syndrome 4; go_component: membrane; go_component: actin cytoskeleton; go_function: protein binding; go_function: oxidoreductase activity; go_function: structural constituent of cytoskeleton; go_process: metabolism; …	ankyrin 2 isoform 1	125	TRUE	4:114190170-114190408
cg03482087	4	129106282	NCBI:RefSeq	36.1	TAGTAGGTGCGCTAAGAGCTCCCCGCGCCTCTTAGCGCGCCGTGTACGCG	129106554	-	GeneID:256471	MGC33302		NM_152778.1	GI:22749524	go_component: membrane; go_component: integral to membrane; go_function: transporter activity; go_process: transport	hypothetical protein LOC256471	272	TRUE	4:129104666-129106616
cg03484533	1	31619078	NCBI:RefSeq	36.1	CGCGAGCTCTGAAGCCCGCTAGACTAAGCTTGCAATCTGAGCTCCATTCA	31618510	-	GeneID:2170	FABP3	MDGI; FABP11; H-FABP; O-FABP;	NM_004102.3	GI:62865867	mammary-derived growth inhibitor; Fatty acid-binding protein 3; muscle; fatty acid binding protein 11; go_component: cytoplasm; go_component: soluble fraction; go_function: fatty acid binding; go_function: lipid transporter activity; go_process: transport; go_process: negative regulation of cell proliferation	fatty acid binding protein 3	568	TRUE	1:31618803-31619140
cg03496289	19	10541229	NCBI:RefSeq	36.1	CGGTGCTTGACACTATCTAATATTATTTGGTTGTTTGAATGTGCGCGTCC	10540655	-	GeneID:1032	CDKN2D	p19; INK4D; p19-INK4D;	NM_079421.2	GI:39995073	CDK inhibitor p19INK4d; cyclin-dependent kinase 4 inhibitor D p19; inhibitor of cyclin-dependent kinase 4d; cell cycle inhibitor; Nur77 associating protein; go_component: nucleus; go_component: cytoplasm; go_function: cyclin-dependent protein kinase inhibitor activity; go_process: cell cycle; go_process: cell cycle arrest; go_process: negative regulation of cell proliferation; go_process: regulat…	cyclin-dependent kinase inhibitor 2D	574	TRUE	19:10540024-10542468
cg03503295	5	13997491	NCBI:RefSeq	36.1	CGGTAAGGTGCTGTTGTCTGTACCTTTGCATGTGTGTTTTGGATTATCAT	13997589	-	GeneID:1767	DNAH5	HL1; PCD; CILD3; DNAHC5; KIAA1603;	NM_001369.1	GI:19115953	dynein heavy chain; go_component: microtubule; go_component: dynein complex; go_function: ATP binding; go_function: nucleotide binding; go_function: microtubule motor activity; go_function: nucleoside-triphosphatase activity; go_process: microtubule-based movement	dynein; axonemal; heavy polypeptide 5	98	FALSE
cg03504701	5	20016614	NCBI:RefSeq	36.1	CGGGTATAAAATACAAATTTGTATGCAATATTAGATTGCACTTAAAGTGA	20017046	-	GeneID:1016	CDH18	CDH14; CDH24; CDH14L; EY-CADHERIN;	NM_004934.2	GI:16445394	cadherin-like 24; cadherin-18; cadherin-14; go_component: membrane; go_component: integral to membrane; go_function: protein binding; go_function: calcium ion binding; go_process: cell adhesion; go_process: homophilic cell adhesion	cadherin 18; type 2 preproprotein	432	FALSE
cg03509024	3	10159013	NCBI:RefSeq	36.1	CGCTTACGAGCAGCGTCACCCTGGATGTGTCCTGCCTCAAGGGGCCTCAG	10158319	+	GeneID:7428	VHL	RCA1; VHL1; HRCA1;	NM_000551.2	GI:38045904	isoform 1 is encoded by transcript variant 1; von Hippel-Lindau syndrome; elongin binding protein; go_component: cytosol; go_component: nucleus; go_component: mitochondrion; go_component: endoplasmic reticulum; go_function: transcription factor binding; go_process: cell cycle; go_process: proteolysis; go_process: anti-apoptosis; go_process: response to stress; go_process: protein stabilization; g…	von Hippel-Lindau tumor suppressor isoform 1	694	TRUE	3:10157841-10160111
cg03519303	4	140156246	NCBI:RefSeq	36.1	TCTATCTATAAATCAGCCTAAGCCCCGCTTCCTTTTAAAACAGGATTACG	140156393	+	GeneID:25819	CCRN4L	NOC; CCR4L; MGC78549; MGC4120817;	NM_012118.2	GI:31083027	nocturnin; CCR4-like (carbon catabolite repression 4; S.cerevisiae); go_component: nucleus; go_function: transcription factor activity; go_process: rhythmic process; go_process: transcription from RNA polymerase II promoter	CCR4 carbon catabolite repression 4-like	147	TRUE	4:140155814-140157099
cg03521113	12	25095939	NCBI:RefSeq	36.1	CATGACCTTAGCCTTTCTCCTTAAGGGTTGTCAATCATAGTATAAACACG	25096508	+	GeneID:4033	LRMP	JAW1;	NM_006152.2	GI:42789728	go_component: integral to plasma membrane; go_component: endoplasmic reticulum membrane; go_process: vesicle fusion; go_process: vesicle targeting; go_process: hemocyte development	lymphoid-restricted membrane protein	569	FALSE
cg03521600	8	121526681	NCBI:RefSeq	36.1	CGGCAGCAATTTCGTCATGAAAGGAGCATATAATGCAGTTATTTAGGGAA	121526847	+	GeneID:27085	MTBP	MDM2BP;	NM_022045.2	GI:21630256	MDM2 (mouse double minute 2)-binding protein; 104kD	Mdm2; transformed 3T3 cell double minute 2; p53 binding protein binding protein	166	TRUE	8:121526191-121527169
cg03522403	20	47238545	NCBI:RefSeq	36.1	AGAAGGTAGGCTGGGTTCTCCCAGACCCGCTTCGAGTCCAGCAGGCAGCG	47238311	-	GeneID:6780	STAU		NM_004602.1	GI:4759175	isoform a is encoded by transcript variant T4; staufen (Drosophila; RNA-binding protein); go_component: intracellular; go_component: rough endoplasmic reticulum; go_component: microtubule associated complex; go_function: protein binding; go_function: protein binding; go_function: double-stranded RNA binding; go_function: double-stranded RNA binding; go_function: intracellular transporter activity	staufen isoform a	234	TRUE	20:47237151-47239171
cg03538345	22	28609922	NCBI:RefSeq	36.1	AACACTGTAATCATTTGCGGAGCAGTCTGACCAGGGTTCCCTCAGTTACG	28609199	+	GeneID:8897	MTMR3	ZFYVE10; KIAA0371; FYVE-DSP1;	NM_021090.2	GI:23510385	isoform c is encoded by transcript variant 3; zinc finger; FYVE domain containing 10; FYVE (Fab1 YGLO23 Vsp27 EEA1 domain) dual-specificity protein phosphatase; go_component: cytoplasm; go_component: membrane fraction; go_function: zinc ion binding; go_function: metal ion binding; go_function: hydrolase activity; go_function: protein tyrosine phosphatase activity; go_function: protein serine/thre…	myotubularin-related protein 3 isoform c	723	TRUE	22:28608869-28610048
cg03538436	12	116283753	NCBI:RefSeq	36.1	CTACATATTTATGCCGCGTTTCCAGCCGCTGGGTGAGGAGCTACTTAGCG	116283965	-	GeneID:4842	NOS1	NOS;	NM_000620.1	GI:10835172	neuronal nitric oxide synthase; go_component: membrane fraction; go_function: FAD binding; go_function: FMN binding; go_function: NADP binding; go_function: heme binding; go_function: iron ion binding; go_function: metal ion binding; go_function: calmodulin binding; go_function: oxidoreductase activity; go_function: electron transporter activity; go_function: nitric-oxide synthase activity; go_pr…	nitric oxide synthase 1 (neuronal)	212	TRUE	12:116282437-116283985
cg03543593	6	32184395	NCBI:RefSeq	36.1	CGCTGCCACCTAGGGAGTCCCCATTTGGATGCCCAAAGAAGCACCCTCTG	32185131	-	GeneID:7148	TNXB	XB; TNX; XBS; HXBL; TENX; TNXB1; TNXB2; TNXBS;	NM_032470.2	GI:20665033	isoform 2 is encoded by transcript variant XB-S; tenascin XB1; tenascin XB2; hexabrachion-like; tenascin-X; go_component: extracellular matrix (sensu Metazoa); go_component: extracellular matrix (sensu Metazoa); go_function: protein binding; go_process: cell adhesion; go_process: cell-matrix adhesion	tenascin XB isoform 2	736	FALSE
cg03545635	7	2438077	NCBI:RefSeq	36.1	TCTGTAATCTTTCTAGCAAATCATCAAACCCCACAGTGGTCTCAGGGACG	2438722	+	GeneID:55501	CHST12	C4S-2; C4ST2; C4ST-2;	NM_018641.2	GI:20070291	chondroitin 4-O-sulfotransferase 2; go_component: Golgi stack; go_component: integral to membrane; go_component: integral to Golgi membrane; go_function: transferase activity; go_function: chondroitin 4-sulfotransferase activity; go_function: 3prime-phosphoadenosine 5prime-phosphosulfate binding; go_process: carbohydrate metabolism; go_process: dermatan sulfate biosynthesis	carbohydrate (chondroitin 4) sulfotransferase 12	645	FALSE
cg03556497	20	36786206	NCBI:RefSeq	36.1	GAAGGGCCAGGATGCGAGCTTAGCACCTCCCCTAGAAATGCAGCACTTCG	36786519	+	GeneID:140679	SLC32A1	VGAT; VIAAT;	NM_080552.2	GI:40806213	GABA and glycine transporter; vesicular GABA transporter; vesicular inhibitory amino acid transporter; go_component: membrane; go_component: integral to membrane; go_function: amino acid-polyamine transporter activity; go_process: amino acid transport; go_process: neurotransmitter transport	solute carrier family 32; member 1	313	TRUE	20:36785163-36788096
cg03557698	1	55044509	NCBI:RefSeq	36.1	CGCCCACGGTCCAAAGCAGCTGCTGCCCACCCCGAAGCCACGCTTGGCCT	55044324	+	GeneID:163747	C1orf177	FLJ40201;	NM_152607.1	GI:22749242	synonym: FLJ40201	hypothetical protein LOC163747	185	TRUE	1:55044094-55044620
cg03557733	17	39340709	NCBI:RefSeq	36.1	ATGGGTGGGCGGAGTAATCAAGCCGGTCTCATTAGGCACTTTTACCATCG	39340639	-	GeneID:4355	MPP2	DLG2; DKFZp761D0712; DKFZp686A06252;	NM_005374.3	GI:52630446	MAGUK p55 subfamily member 2; discs large; homolog 2; go_component: membrane; go_component: cell surface; go_component: membrane fraction; go_component: integral to plasma membrane; go_function: protein binding; go_function: guanylate kinase activity; go_process: signal transduction; go_process: signal transduction; go_process: protein complex assembly	palmitoylated membrane protein 2	70	TRUE	17:39339717-39340797
cg03558299	20	47096004	NCBI:RefSeq	36.1	CGTGCCAAGCCCTGACATCAAAATGGGTCAGAAGCCAGCAGCCGCTCGCT	47096245	+	GeneID:1434	CSE1L	CAS; CSE1; XPO2; MGC117283; MGC130036; MGC130037;	NM_001316.2	GI:29029558	chromosome segregation 1 (yeast homolog)-like; importin-alpha re-exporter; cellular apoptosis susceptibility protein; go_component: nucleus; go_component: nuclear pore; go_component: cytoplasm; go_function: binding; go_function: protein transporter activity; go_function: importin-alpha export receptor activity; go_process: apoptosis; go_process: protein transport; go_process: cell proliferation; …	CSE1 chromosome segregation 1-like protein	241	TRUE	20:47095791-47097214
cg03560597	22	29394008	NCBI:RefSeq	36.1	CGCCCAACGACCATGGCTTCCAACCGGCCTCCGTGCGCCCAACGACCATG	29393872	-	GeneID:150290	DUSP18	DUSP20; LMWDSP20; MGC32658; bK963H5.1;	NM_152511.3	GI:51093844	low molecular weight dual specificity phosphatase 20; go_component: nucleus; go_function: hydrolase activity; go_function: protein tyrosine/serine/threonine phosphatase activity; go_process: protein amino acid dephosphorylation	dual specificity phosphatase 18	136	TRUE	22:29393262-29394461
cg03562120	20	42777411	NCBI:RefSeq	36.1	TGCCTGGGAGTGACCTCACAGCTGCCGGAACATAAAGACTCACAGGTCCG	42777299	+	GeneID:8839	WISP2	CCN5; CT58; CTGF-L;	NM_003881.2	GI:18491001	wnt-1 signaling pathway protein 2; connective tissue growth factor-like protein; go_component: extracellular region; go_component: soluble fraction; go_function: protein binding; go_function: insulin-like growth factor binding; go_process: cell adhesion; go_process: cell-cell signaling; go_process: signal transduction; go_process: regulation of cell growth	WNT1 inducible signaling pathway protein 2 precursor	112	TRUE	20:42777169-42777483
cg03572913	20	33751267	NCBI:RefSeq	36.1	CGCTTCCAACCTGACTTTACAGATTGAAGGTGGTTTGGAATGAGTCTGGC	33750806	+	GeneID:140823	C20orf52	MGC111180; bA353C18.2;	NM_080748.1	GI:18152784	homolog of mouse RIKEN 2010100O12 gene; go_component: integral to membrane	hypothetical protein LOC140823	461	TRUE	20:33749751-33751308
cg03573747	3	188043311	NCBI:RefSeq	36.1	CGGGAGAGCCTGGGTGATCCCAGCCAGAGGCTATGCATGCATCCCCCACC	188043157	+	GeneID:9370	ADIPOQ	ACDC; APM1; APM-1; GBP28; ACRP30; adiponectin;	NM_004797.2	GI:44890057	adipose most abundant gene transcript 1; adipocyte; C1Q and collagen domain-containing; adipocyte; C1Q and collagen domain containing; gelatin-binding protein 28; go_component: cytoplasm; go_component: extracellular region; go_function: hormone activity; go_process: phosphate transport; go_process: generation of precursor metabolites and energy	adiponectin precursor	154	FALSE
cg03580876	22	45110338	NCBI:RefSeq	36.1	CGGTAGCTGCAGCTGGCGAAGTTGGGCGACTGGCGGATGCAGGCCTTGCG	45109986	+	GeneID:55687	TRMU	MTO2; MTU1; TRMT; TRMT1; MGC99627;	NM_018006.3	GI:56699391	isoform a is encoded by transcript variant 1; mitochondrial tRNA-specific 2-thiouridylase 1; tRNA (5-methylaminomethyl-2-thiouridylate)-methyltransferase 1; go_component: cytoplasm; go_component: mitochondrion; go_function: transferase activity; go_function: methyltransferase activity; go_function: tRNA (5-methylaminomethyl-2-thiouridylate)-methyltransferase activity; go_function: tRNA (5-methyla…	tRNA (5-methylaminomethyl-2-thiouridylate)-methyltransferase 1 isoform a	352	TRUE	22:45109458-45111250
cg03589001	15	76951769	NCBI:RefSeq	36.1	CGGAGCCTATTTGGTGGGATTGATAGCCATTTGTTGGCTCCTAGGTCTAC	76952227	+	GeneID:10933	MORF4L1	Eaf3; MRG15; FWP006; S863-6; HsT17725; MGC10631; MORFRG15;	NM_206839.1	GI:45643134	isoform 2 is encoded by transcript variant 2; MORF-related gene 15; go_component: nucleus; go_process: transcription; go_process: chromatin modification; go_process: regulation of cell growth; go_process: regulation of transcription; DNA-dependent	MORF-related gene 15 isoform 2	458	TRUE	15:76951750-76953285
cg03591238	11	64642134	NCBI:RefSeq	36.1	GTGTCCCCTAGTGCATTTTATTTGTCTGTGTCCAGCGCAGGGATGCATCG	64641746	-	GeneID:741	ZNHIT2	FON; C11orf5; MGC120285; MGC120286;	NM_014205.2	GI:42716303	go_function: zinc ion binding; go_function: metal ion binding	zinc finger; HIT domain containing 2	388	TRUE	11:64640633-64642537
cg03594044	8	33450268	NCBI:RefSeq	36.1	AGAGCTTGTGAACAGGGCACGAGTGAAAACCCGGATCCAGGCTGGCTCCG	33450206	-	GeneID:84750	FUT10	MGC11141;	NM_032664.3	GI:40805105	alpha 1;3-fucosyl transferase; go_component: membrane; go_component: Golgi stack; go_component: integral to membrane; go_function: fucosyltransferase activity; go_function: alpha(1;3)-fucosyltransferase activity; go_function: transferase activity; transferring glycosyl groups; go_process: hemopoiesis; go_process: fertilization; go_process: wound healing; go_process: protein folding; go_process: p…	fucosyltransferase 10	62	TRUE	8:33449522-33450533
cg03605339	17	70617458	NCBI:RefSeq	36.1	CGGGAGGCCAGGCTGCTCCTCGCAGTACACCCACCCACGCCTGCACCTGC	70617677	+	GeneID:79637	ARMC7	FLJ22160;	NM_024585.2	GI:20149678	go_function: binding	armadillo repeat containing 7	219	TRUE	17:70616686-70618455
cg03606258	20	56860330	NCBI:RefSeq	36.1	CGGCCGCAGCGCTGGTCAGTCAGCTCCTTTAGCCCCACTACAGCCTGCCT		+	GeneID:2778	GNAS	XL; AHO; GSA; GSP; POH; XL2; GPSA; NESP; GNAS1; PHP1A; PHP1B; GNASXL; NESP55; C20orf45; MGC33735; XLalphas; dJ309F20.1.1; dJ806M20.3.3;	NT_011362.9	guanine nucleotide binding protein; alpha stimulating activity polypeptide 1 isoform a	isoform a is encoded by transcript variant 1; guanine nucleotide binding protein (G protein); alpha stimulating activity polypeptide 1; neuroendocrine secretory protein 55; paternally expressed G protein XL alpha S; guanine nucleotide regulatory protein; G-s-alpha; adenylate cyclase-stimulating G alpha protein; neuroendocrine-specific Golgi protein p55; go_component: plasma membrane; go_component…			TRUE	20:56860042-56860698
cg03608577	6	29450658	NCBI:RefSeq	36.1	CTGGCTATCATGGCCTTTGACCGTTTTGTTGCCATCTGCAATCCTCTTCG	29451047	-	GeneID:81797	OR12D3	hs6M1-27; MGC119267;	NM_030959.2	GI:31377669	olfactory receptor OR6-27; go_component: integral to membrane; go_function: receptor activity; go_function: olfactory receptor activity; go_process: sensory perception; go_process: signal transduction; go_process: sensory perception of smell; go_process: G-protein coupled receptor protein signaling pathway	olfactory receptor; family 12; subfamily D; member 3	389	FALSE
cg03619472	16	55043764	NCBI:RefSeq	36.1	TAGCCAGGGCATTTGTCGTGAGCTGCCAGCTTGACTCCCTAGTGTACTCG	55042762	-	GeneID:11051	NUDT21	CPSF5; CFIM25; DKFZp686H1588;	NM_007006.2	GI:59889569	pre-mRNA cleavage factor Im (25kD); cleavage and polyadenylation specific factor 5; 25 kD subunit; cleavage and polyadenylation specific factor 5; 25 kDa; pre-mRNA cleavage factor Im; 25kD subunit; go_component: nucleus; go_function: RNA binding; go_process: mRNA processing	cleavage and polyadenylation specific factor 5	1002	TRUE	16:55043649-55043908
cg03625911	1	201422360	NCBI:RefSeq	36.1	CACAACTCTGATGGATTAACCTTGGCTAGCCCAGATACCTGTTTGAGACG	201422500	-	GeneID:1116	CHI3L1	GP39; YKL40; HC-gp39; HCGP-3P;	NM_001276.1	GI:4557017	cartilage glycoprotein-39; go_component: extracellular space; go_component: extracellular matrix (sensu Metazoa); go_function: sugar binding; go_function: chitinase activity; go_function: extracellular matrix structural constituent; go_function: hydrolase activity; hydrolyzing O-glycosyl compounds; go_process: chitin catabolism; go_process: carbohydrate metabolism	chitinase 3-like 1	140	FALSE
cg03626672	2	237143403	NCBI:RefSeq	36.1	GCTTCTGCTCTTAAGCCAAGTGGTCTTTTCAAAGGCCTTCTTTAAAATCG	237143182	+	GeneID:57007	CMKOR1	RDC1; GPR159;	NM_020311.1	GI:31083343	homologue of canine orphan receptor; G protein-coupled receptor; go_component: integral to membrane; go_function: receptor activity; go_function: rhodopsin-like receptor activity; go_function: G-protein coupled receptor activity; unknown ligand; go_process: signal transduction; go_process: G-protein coupled receptor protein signaling pathway	chemokine orphan receptor 1	221	TRUE	2:237143297-237143512
cg03634982	11	59804555	NCBI:RefSeq	36.1	CGGAAGCATTAACTGATTTTGTGTTCCCAATATGGGTGTGGATGTCTATT	59804715	+	GeneID:51338	MS4A4A	MS4A4; MS4A7; 4SPAN1; CD20L1; CD20-L1; HDCME31P; MGC22311;	NM_024021.2	GI:20070327	isoform a is encoded by transcript variant 1; membrane-spanning 4-domains; subfamily A; member 4A; four-span transmembrane protein; Fc epsilon receptor beta subunit homolog; go_component: membrane; go_component: integral to membrane; go_function: receptor activity; go_process: signal transduction	membrane-spanning 4-domains; subfamily A; member 4 isoform a	160	FALSE
cg03634997	16	88616784	NCBI:RefSeq	36.1	CGGAGACCCCCACAAGAGCACCGAGCTCTCAATTCCAGAAACCCAGCGCT	88616509	+	GeneID:2622	GAS8	GAS11;	NM_001481.1	GI:4503916	growth arrest specific 11; growth arrest-specific 11; go_component: cytoskeleton; go_component: microtubule; go_component: flagellum (sensu Eukaryota); go_function: Ras GTPase activator activity; go_process: sperm motility; go_process: negative regulation of cell proliferation; go_process: negative regulation of Ras protein signal transduction	growth arrest-specific 8	275	TRUE	16:88616246-88616821
cg03651573	19	63746939	NCBI:RefSeq	36.1	ACATTTTTCTCCATCTGTGGTCTAGGCTGGCGTGCAGTGGCACAATCCCG	63747648	+	GeneID:10155	TRIM28	KAP1; TF1B; RNF96; TIF1B;	NM_005762.2	GI:14971416	KRAB-associated protein 1; transcriptional intermediary factor 1-beta; nuclear corepressor KAP-1; go_component: nucleus; go_component: ubiquitin ligase complex; go_function: zinc ion binding; go_function: metal ion binding; go_function: protein binding; go_function: transcription factor activity; go_function: ubiquitin-protein ligase activity; go_function: transcription corepressor activity; go_p…	tripartite motif-containing 28 protein	709	TRUE	19:63746256-63748563
cg03664992	1	39729980	NCBI:RefSeq	36.1	GAGGCCGGGGCTGTTCTGAGGGCTGGGACTGTCAGCCAATCCGTCTGTCG	39729905	+	GeneID:353500	BMP8A		NM_181809.1	GI:32441272	go_component: extracellular region; go_function: growth factor activity; go_process: growth	bone morphogenetic protein 8A	75	TRUE	1:39728948-39730841
cg03665457	10	38685382	NCBI:RefSeq	36.1	TTCCGAAAGCAGCGGCGGCGTTTGCTTCACTGCTTGGAAGTGTGAGTGCG	38685312	+	GeneID:158160	LOC158160	HSD17B7; FLJ40773; Hsd17b_2; MGC88684;	NM_182829.1	GI:33469144	isoform 2 is encoded by transcript variant 2; hydroxysteroid (17-beta) dehydrogenase 7; 17beta-hydroxysteroid dehydrogenase type 7 form 2; go_function: oxidoreductase activity; go_process: metabolism	17-beta-hydroxysteroid dehydrogenase type VII-like isoform 2	70	TRUE	10:38684978-38685687
cg03667047	13	32487962	NCBI:RefSeq	36.1	GGGAACTTCGCCGTGCGCTGAAAGGGATTCCCCCTTAGGTGAGATGCTCG	32488571	+	GeneID:9365	KL		NM_004795.2	GI:24497613	isoform a is encoded by transcript variant 1; go_component: membrane; go_component: integral to membrane; go_function: hormone activity; go_function: vitamin D binding; go_function: glucosidase activity; go_function: beta-glucuronidase activity; go_process: carbohydrate metabolism	klotho isoform a	609	TRUE	13:32487803-32489516
cg03668539	19	7459324	NCBI:RefSeq	36.1	AACACGAGATTGTTCAGGACAACTTCAGTGGCCTGGTCGGATCCAAAACG	7459905	-	GeneID:92960	PEX11G	MGC4281;	NM_080662.2	GI:39725665	peroxin Pex11p gamma; peroxisomal biogenesis factor 11G; go_component: integral to membrane; go_component: peroxisomal membrane; go_process: peroxisome fission	peroxisomal biogenesis factor 11 gamma	581	TRUE	19:7459253-7460264
cg03670238	8	134271552	NCBI:RefSeq	36.1	CGTGTCATGAAGGTGATGCTGTAACCTGAGCCTCAGAGCTCATTTTATTT	134272494	+	GeneID:8840	WISP1	CCN4; WISP1i;	NM_003882.2	GI:18490998	isoform 1 precursor is encoded by transcript variant 1; wnt-1 signaling pathway protein 1; Wnt-1 inducible signaling pathway protein 1; Wnt1 signaling pathway protein 1; go_component: extracellular region; go_component: soluble fraction; go_function: protein binding; go_function: insulin-like growth factor binding; go_process: cell adhesion; go_process: cell-cell signaling; go_process: signal tra…	WNT1 inducible signaling pathway protein 1 isoform 1 precursor	942	FALSE
cg03679581	9	5294511	NCBI:RefSeq	36.1	CCACCTGCTAGGAGTCTGTTTACTACTGAACCAATTTTCCAGAGCAGTCG	5294580	-	GeneID:6019	RLN2	H2; RLXH2; bA12D24.1.1; bA12D24.1.2;	NM_134441.1	GI:20143932	isoform 1 preproprotein is encoded by transcript variant 1; relaxin 2 (H2); relaxin H2; prorelaxin H2; relaxin; ovarian; of pregnancy; go_component: extracellular region; go_function: hormone activity; go_process: pregnancy; go_process: physiological process	relaxin 2 isoform 1 preproprotein	69	TRUE	9:5293703-5294659
cg03686067	18	64655369	NCBI:RefSeq	36.1	CTGAGGTGGCAAACTCTGTTTCTTTTTCAGTGTACTCAATTCTTTCATCG	64655575	+	GeneID:79839	C18orf14	HsT1731; FLJ23594; DKFZp434K1426;	NM_024781.1	GI:13376139	synonyms: HsT1731; FLJ23594; DKFZp434K1426	hypothetical protein LOC79839	206	FALSE
cg03688818	3	49686151	NCBI:RefSeq	36.1	CGAGGCCGACATTCACTACACAGTGCCAGGCCCTGCCCTGGAGGGAGTTC	49686439	+	GeneID:327	APEH	APH; OPH; ACPH; D3S48E; D3F15S2; DNF15S2; MGC2178;	NM_001640.3	GI:23510450	acylaminoacyl-peptidase; oxidized protein hydrolase; go_function: hydrolase activity; go_function: prolyl oligopeptidase activity; go_function: serine-type peptidase activity; go_function: acylaminoacyl-peptidase activity; go_process: proteolysis	N-acylaminoacyl-peptide hydrolase	288	TRUE	3:49685901-49687349
cg03693099	9	134926722	NCBI:RefSeq	36.1	GACACTTCCACACCCTTGAGTGGGACTGCCTTGTGCTGCTCTGGGATTCG	134927186	+	GeneID:1056	CEL	BAL; FAP; BSDL; BSSL; CELL; FAPP; LIPA; CEase;	NM_001807.2	GI:27894374	bile salt-stimulated lipase; carboxyl ester hydrolase; cholesterol esterase; bile salt-dependent lipase; bile salt-dependent lipase; oncofetal isoform; included; fetoacinar pancreatic protein; lysophospholipase; pancreatic; bile salt-stimulated carboxyl ester lipase; bile-salt-activated lipase; sterol esterase; go_function: hydrolase activity; go_function: serine esterase activity; go_function: s…	carboxyl ester lipase precursor	464	FALSE
cg03704393	9	96081822	NCBI:RefSeq	36.1	AGAAAACTAATGTGGCTAAAGACCACTGGCTGTTGAAAGCTTCCCACACG	96080861	+	GeneID:169841	ZNF169	MGC51961;	NM_194320.1	GI:34996534	go_component: nucleus; go_component: nucleus; go_component: intracellular; go_function: zinc ion binding; go_function: metal ion binding; go_function: nucleic acid binding; go_function: transcription factor activity; go_process: transcription; go_process: regulation of transcription; DNA-dependent; go_process: regulation of transcription; DNA-dependent	zinc finger protein 169	961	FALSE
cg03716937	8	39815019	NCBI:RefSeq	36.1	TCACGTCCAGTGGAGTGCTTGTCCTGCAAGAGACAGGGCTCAGGAGCTCG	39814936	-	GeneID:2515	ADAM2	FTNB; PH30; CRYN1; CRYN2; PH-30b;	NM_001464.3	GI:55743079	fertilin beta; a disintegrin and metalloproteinase domain 2; a disintegrin and metalloproteinase domain 2 (fertilin beta); go_component: integral to plasma membrane; go_function: protein binding; go_function: integrin binding; go_function: metalloendopeptidase activity; go_process: proteolysis; go_process: cell adhesion; go_process: fusion of sperm to egg plasma membrane	ADAM metallopeptidase domain 2 proprotein	83	TRUE	8:39814758-39815055
cg03718677	1	149414890	NCBI:RefSeq	36.1	CGGCACAGTGGCAGAAATATACACTGAGTGACAGAGACAGGGACACACTC	149415050	-	GeneID:29765	TMOD4	Sk-Tmod; DKFZp779I0852;	NM_013353.1	GI:7019556	actin-capping protein; go_component: cytoskeleton; go_component: F-actin capping protein complex; go_function: actin binding; go_function: tropomyosin binding; go_function: tropomyosin binding; go_process: muscle contraction	tropomodulin 4 (muscle)	160	FALSE
cg03729431	17	15788989	NCBI:RefSeq	36.1	CGTGACGGGAAGTTGGGGCAATTTGTTAGTTATCCGCCGCCACCAAGACG	15788956	+	GeneID:136	ADORA2B	ADORA2;	NM_000676.2	GI:22907046	go_component: integral to plasma membrane; go_function: receptor activity; go_function: rhodopsin-like receptor activity; go_function: A2B adenosine receptor activity; G-protein coupled; go_process: excretion; go_process: JNK cascade; go_process: signal transduction; go_process: cellular defense response; go_process: activation of MAPK activity; go_process: adenylate cyclase activation; go_proces…	adenosine A2b receptor	33	TRUE	17:15788296-15790391
cg03732056	8	21827005	NCBI:RefSeq	36.1	CGTCTGCTGCTGCTGAAGATACAAGAAGCCTTGTTTCACTGCCCCGTCTC	21827151	-	GeneID:9046	DOK2	p56DOK; p56dok-2;	NM_003974.2	GI:41406049	go_function: protein binding; go_function: insulin receptor binding; go_process: cell surface receptor linked signal transduction	docking protein 2	146	FALSE
cg03732545	1	203278753	NCBI:RefSeq	36.1	TGGCTTTACCTCATTTGCTGTCATTTAAGGACCAGGGAGCGAGCCCAGCG	203278963	+	GeneID:6900	CNTN2	AXT; TAX; TAX1; TAG-1; DKFZp781D102;	NM_005076.2	GI:28373120	transiently-expressed axonal glycoprotein; contactin 2 (transiently expressed); axonin-1 cell adhesion molecule; transient axonal glycoprotein 1; go_component: plasma membrane; go_component: integral to plasma membrane; go_function: protein binding; go_process: cell adhesion	contactin 2 precursor	210	TRUE	1:203278669-203279212
cg03738331	4	3046103	NCBI:RefSeq	36.1	TGCGGGGGCAGGGGCGGGCTGGTTCCCTGGCCAGCCATTGGCAGAGTCCG	3046206	+	GeneID:3064	HD	HTT; IT15;	NM_002111.5	GI:66934964	go_component: nucleus; go_component: cytoplasm; go_component: soluble fraction; go_function: protein binding; go_function: microtubule binding; go_function: transporter activity; go_function: transcription corepressor activity; go_process: behavior; go_process: apoptosis; go_process: pathogenesis; go_process: organ morphogenesis; go_process: induction of apoptosis	huntingtin	103	TRUE	4:3045255-3047355
cg03738959	9	37894295	NCBI:RefSeq	36.1	CGCCAGCACACCTGTCAGGATGCGGGCTCCGCTAGCCACCATGCTTCACC	37894111	-	GeneID:92014	MCART1	CG7943; MGC14836;	NM_033412.1	GI:15529971	go_component: mitochondrion; go_component: inner membrane; go_component: integral to membrane; go_function: binding; go_process: transport	mitochondrial carrier triple repeat 1	184	TRUE	9:37893374-37895202
cg03742003	4	19864362	NCBI:RefSeq	36.1	TGTGCACCAAATAATATGGAACAAGGCAGTAGAGCCCACTCAGGCACACG	19864333	+	GeneID:9353	SLIT2	SLIL3; Slit-2;	NM_004787.1	GI:4759145	slit (Drosophila) homolog 2; go_component: extracellular space; go_component: integral to membrane; go_function: calcium ion binding; go_function: receptor binding; go_function: follicle stimulating hormone receptor activity; go_process: chemotaxis; go_process: sensory perception; go_process: cell differentiation; go_process: mesoderm migration; go_process: neuron recognition; go_process: motor a…	slit homolog 2	29	TRUE	4:19862145-19866149
cg03742214	12	106011513	NCBI:RefSeq	36.1	CGCGCTCCCCTCGTGACCACCGGCACCTCACGTTTCTGAAGTGTGTTTAC	106011455	-	GeneID:1407	CRY1	PHLL1;	NM_004075.2	GI:19923246	go_component: mitochondrion; go_function: lyase activity; go_function: DNA binding; go_function: DNA photolyase activity; go_function: G-protein coupled photoreceptor activity; go_process: DNA repair; go_process: visual perception; go_process: circadian rhythm	cryptochrome 1 (photolyase-like)	58	TRUE	12:106010575-106012121
cg03742272	17	7931430	NCBI:RefSeq	36.1	CGGGACTCCATCTCACTGACCATTGTGGGGACACAAGGAGAGAGCCATAA	7931746	-	GeneID:242	ALOX12B	12R-LOX;	NM_001139.1	GI:4502052	go_function: iron ion binding; go_function: metal ion binding; go_function: lipoxygenase activity; go_function: oxidoreductase activity; go_function: electron transporter activity; go_function: arachidonate 12-lipoxygenase activity; go_process: electron transport; go_process: lipid metabolism; go_process: leukotriene biosynthesis; go_process: epidermis development	arachidonate 12-lipoxygenase; 12R type	316	FALSE
cg03743584	10	135010898	NCBI:RefSeq	36.1	CGCGGACCCCAGACATGAGGAGGTAATGCCACCATCCCTGAGCCCCAATC	135010901	+	GeneID:118471	PRAP1	UPA; PRO1195; MGC126792; RP11-122K13.6;	NM_145202.3	GI:48976058	uterine-specific proline-rich acidic protein; uterine-specific proline-rich acidic protein (UPA)	proline-rich acidic protein 1	3	FALSE
cg03747695	19	49408482	NCBI:RefSeq	36.1	GGGAAACGTATTCCAGAACTCTGTCCGGAAACAATTGGGCCGCAGGAGCG	49408531	+	GeneID:7770	ZNF227		NM_182490.1	GI:32698785	Genscan prediction; go_component: nucleus; go_function: DNA binding; go_function: zinc ion binding; go_function: metal ion binding; go_function: nucleic acid binding; go_process: transcription; go_process: regulation of transcription; DNA-dependent	zinc finger protein 227	49	TRUE	19:49408289-49408872
cg03752628	1	117255033	NCBI:RefSeq	36.1	CGCAGCTAGGCAGCTTCAAGAAAAGCTAAAAGAAAAGACTGAGGCAGAAG	117254212	+	GeneID:5738	PTGFRN	FPRP; CD315; EWI-F; CD9P-1; SMAP-6; FLJ11001; KIAA1436;	NM_020440.2	GI:41152505	CD9 partner 1; go_component: membrane; go_component: Golgi stack; go_component: integral to membrane; go_component: endoplasmic reticulum; go_function: protein binding; go_function: protein binding; go_process: negative regulation of protein biosynthesis	prostaglandin F2 receptor negative regulator	821	TRUE	1:117253545-117255169
cg03752689	1	208024808	NCBI:RefSeq	36.1	CGTCTGGTGTCCCACTTGACTGGGAATCCAGAAACAGGGCACACAGCAGT	208024513	-	GeneID:148304	C1orf74	FLJ25078;	NM_152485.2	GI:31542750	synonym: FLJ25078	hypothetical protein LOC148304	295	TRUE	1:208024206-208024907
cg03761560	10	73784866	NCBI:RefSeq	36.1	CGCCCAGATTCCATGTTCCGGAGGTCTTAGAGTTGAGTATGCGCCAACCC	73784875	-	GeneID:54788	DNAJB12	DJ10; DKFZp586B2023;	NM_017626.3	GI:50593535	synonyms: DJ10; DKFZp586B2023	DnaJ (Hsp40) homolog; subfamily B; member 12	9	TRUE	10:73783520-73785065
cg03762535	1	119713003	NCBI:RefSeq	36.1	CGCAGCCACTCAAAGCCTGGCTCACTGCCGGAGGTGTTAGGAAACACACC	119712925	+	GeneID:51179	HAO2	GIG16; HAOX2;	NM_016527.2	GI:54234004	(S)-2-hydroxy-acid oxidase; glycolate oxidase; long-chain L-2-hydroxy acid oxidase; growth-inhibiting protein 16; go_component: peroxisome; go_function: FMN binding; go_function: oxidoreductase activity; go_function: (S)-2-hydroxy-acid oxidase activity; go_process: electron transport; go_process: fatty acid alpha-oxidation	hydroxyacid oxidase 2	78	FALSE
cg03763616	19	55613809	NCBI:RefSeq	36.1	CGGGGATCCCCAAATCCAGACAGCCCCTGGCCCGCCATCCCTGCCATGTG	55614028	+	GeneID:6689	SPIB	SPI-B;	NM_003121.2	GI:61888835	go_component: nucleus; go_component: cytoplasm; go_function: transcription factor activity; go_function: RNA polymerase II transcription factor activity; go_process: transcription; go_process: regulation of transcription from RNA polymerase II promoter	Spi-B transcription factor (Spi-1/PU.1 related)	219	FALSE
cg03764161	11	58668903	NCBI:RefSeq	36.1	CGCAGTTCCCGCTCGTATTTGAGGAAGCAAAGGCTCCAGAGCTCCAGCTG	58668828	+	GeneID:63901	FAM111A	FLJ22794; KIAA1895; DKFZp686A06175;	NM_022074.2	GI:38505208	synonyms: FLJ22794; KIAA1895; DKFZp686A06175	hypothetical protein LOC63901	75	TRUE	11:58668658-58669202
cg03764352	12	22669256	NCBI:RefSeq	36.1	GCAGTTCCCAGGGATGGGTGTGTGCTAATCGCAGGCCAACAAGCCCAGCG	22669276	+	GeneID:55500	ETNK1	EKI; EKI1;	NM_018638.3	GI:21071078	go_component: cytoplasm; go_function: kinase activity; go_function: transferase activity; go_function: ethanolamine kinase activity; go_process: phosphatidylethanolamine biosynthesis	ethanolamine kinase 1	20	TRUE	12:22668875-22669798
cg03770147	2	207738081	NCBI:RefSeq	36.1	CAAGTGGGTAGAGCTCATGCATGCGAGAACGTGGTCCCTGTCAGCAATCG	207738859	-	GeneID:8609	KLF7	UKLF;	NM_003709.1	GI:4507828	ubiquitous Kruppel-like transcription factor; go_component: nucleus; go_function: metal ion binding; go_function: zinc ion binding; go_function: transcription factor activity; go_function: transcription coactivator activity; go_process: transcription; go_process: regulation of transcription from RNA polymerase II promoter	Kruppel-like factor 7 (ubiquitous)	778	TRUE	2:207737896-207738415
cg03771255	4	152240390	NCBI:RefSeq	36.1	CGCCGCGATCTAGGACCAGCCCGCCGATTCCAGCAGACCCCCAAAAAGCA	152240204	+	GeneID:6189	RPS3A	FTE1; MFTL; MGC23240;	NM_001006.3	GI:70609888	40S ribosomal protein S3a; v-fos transformation effector protein 1; go_component: ribosome; go_function: protein binding; go_function: structural constituent of ribosome; go_process: protein biosynthesis	ribosomal protein S3a	186	TRUE	4:152239741-152240869
cg03773789	8	144420320	NCBI:RefSeq	36.1	CGACCTGAAAAGAGAAAATTGTCACTTTCTGGGAAAAATAAACGGCCGGG	144420982	+	GeneID:2738	GLI4	HKR4;	NM_138465.3	GI:41152252	GLI-Kruppel family member GLI4 (oncogene HKR4); go_component: nucleus; go_component: nucleus; go_function: DNA binding; go_function: zinc ion binding; go_function: metal ion binding; go_function: nucleic acid binding; go_process: biological process unknown	GLI-Kruppel family member GLI4	662	TRUE	8:144419782-144421599
cg03775123	15	63001128	NCBI:RefSeq	36.1	TGGTTGTATGGTTTAGTCATAAGGCACAGGGCCTGGCTGGCACAGCCACG	63001179	+	GeneID:348094	ANKDD1A	FLJ25870; MGC120306; MGC120307;	NM_182703.2	GI:38176293	synonyms: FLJ25870; MGC120306; MGC120307	hypothetical protein LOC348094	51	FALSE
cg03780486	11	6773856	NCBI:RefSeq	36.1	CGGCTGCCCTAAAATGAGAGTTTGTCTTTGAGTTGGATCATGACTCTGTT	6773715	-	GeneID:8590	OR6A2	I7; OR6A1; OR6A2P; OR11-55; MGC126538; MGC126540;	NM_003696.2	GI:34330167	hI7 olfactory receptor; seven transmembrane helix receptor; olfactory receptor; family 6; subfamily A; member 2 pseudogene; go_component: integral to plasma membrane; go_function: receptor activity; go_function: olfactory receptor activity; go_process: sensory perception; go_process: signal transduction; go_process: sensory perception of smell; go_process: G-protein coupled receptor protein signa…	olfactory receptor; family 6; subfamily A; member 1	141	FALSE
cg03789934	19	61034477	NCBI:RefSeq	36.1	ACGGGCATTAACATTAAAATAGAGCTCAGGACCGGGTGCAGGAGCTCACG	61035172	-	GeneID:204801	NALP11	NOD17; PAN10; PYPAF6;	NM_145007.1	GI:21450724	NACHT; LRR and PYD containing protein 11; PYRIN-containing APAF1-like protein 6; PAAD- and NACHT-containing protein 10; PAAD- and NACHT-containing protein 10B; go_function: ATP binding; go_function: nucleotide binding	NACHT; leucine rich repeat and PYD containing 11	695	FALSE
cg03790207	6	43055087	NCBI:RefSeq	36.1	AGATAAATCCCTTAAGCACAAGTTCAAATGGCGCATGGGTAAACGCTACG	43054866	-	GeneID:5190	PEX6	PAF2; PAF-2; PXAAA1;	NM_000287.2	GI:21361243	Peroxisomal biogenesis factor 6 (peroxisomal AAA-type ATPase 1); peroxisome biogenesis factor 6; go_component: membrane; go_component: peroxisome; go_component: cytoplasm; go_component: integral to membrane; go_function: ATP binding; go_function: nucleotide binding; go_function: ATPase activity; coupled; go_function: nucleoside-triphosphatase activity; go_process: peroxisome organization and biog…	peroxisomal biogenesis factor 6	221	TRUE	6:43054247-43055196
cg03794550	11	22603173	NCBI:RefSeq	36.1	AGTCCACTGGCTTCTGGGGAATTCGGAAGTCTTTGCTGCCTTTTGTCGCG		-	GeneID:2188	FANCF	FAF;	NT_009237.17	Fanconi anemia; complementation group F	go_component: nucleus; go_function: protein binding; go_process: DNA repair			TRUE	11:22603124-22604113
cg03805442	17	28644807	NCBI:RefSeq	36.1	AAGAGTTTCACAGAAATGCCCATTCACACATACACAATGCACATCCTACG	28644119	-	GeneID:40	ACCN1	ACCN; BNC1; MDEG; ASIC2; BNaC1; ASIC2a; hBNaC1;	NM_183377.1	GI:34452694	similarity to MDEG2 (Mus musculus) isoform 1 is encoded by transcript variant 1; degenerin; neuronal amiloride-sensitive cation channel 1; go_component: membrane; go_component: membrane fraction; go_component: integral to plasma membrane; go_function: sodium ion binding; go_function: protein binding; go_function: ion channel activity; go_function: amiloride-sensitive sodium channel activity; go_p…	amiloride-sensitive cation channel 1; neuronal (degenerin) isoform 1	688	TRUE	17:28642370-28644971
cg03809891	19	12337514	NCBI:RefSeq	36.1	CGCGCCTGACTGGCAGTTCCCAAGAACTCGCCCCCAACACTGATTGGGTA	12337447	-	GeneID:79973	ZNF442	FLJ14356;	NM_030824.1	GI:13540500	go_component: nucleus; go_function: DNA binding; go_function: zinc ion binding; go_function: metal ion binding; go_process: transcription; go_process: regulation of transcription; DNA-dependent	zinc finger protein 442	67	FALSE
cg03811411	5	155686194	NCBI:RefSeq	36.1	CGGCAGGTAGGGAGATCAAATTAGAATTTACATCTCTCAGCTGTAATAAG	155686345	+	GeneID:6444	SGCD	SGD; DAGD; 35DAG; CMD1L; MGC22567; SG-delta;	NM_000337.4	GI:46249398	isoform 1 is encoded by transcript variant 1; sarcoglycan; delta (35kD dystrophin-associated glycoprotein); placental delta sarcoglycan; dystrophin associated glycoprotein; delta sarcoglycan; go_component: cytoskeleton; go_component: plasma membrane; go_component: sarcoglycan complex; go_component: integral to membrane; go_component: sarcoglycan complex; go_process: muscle development; go_process…	delta-sarcoglycan isoform 1	151	FALSE
cg03819692	16	87753140	NCBI:RefSeq	36.1	CGAGGTCACTGGAGGATAAACATCCGTGACTGCACCTCATGATCCATCAC	87753129	+	GeneID:283860	FLJ36701		NM_173617.1	GI:27734731		hypothetical protein LOC283860	11	TRUE	16:87752957-87753393
cg03821311	6	27943997	NCBI:RefSeq	36.1	CCACAGTCAGAGTGACTTCTTCTGCATTGCAGCACCAGTAATACAAATCG	27943404	-	GeneID:3009	HIST1H1B	H1; H1.5; H1F5; MGC126630; MGC126632;	NM_005322.2	GI:15718716	go_component: nucleus; go_component: chromosome; go_component: nucleosome; go_function: DNA binding; go_process: nucleosome assembly; go_process: chromosome organization and biogenesis (sensu Eukaryota)	H1 histone family; member 5	593	FALSE
cg03822011	11	22603297	NCBI:RefSeq	36.1	CGGCTGCAACAGCGCCACCGCTATCACCTTCAGGAAGTTGTTCTGAGGCA		-	GeneID:2188	FANCF	FAF;	NT_009237.17	Fanconi anemia; complementation group F	go_component: nucleus; go_function: protein binding; go_process: DNA repair			TRUE	11:22603124-22604113
cg03825921	1	227474140	NCBI:RefSeq	36.1	TTCAGCTGCGATATTATCCCCAGCGAGCCTGTGAAGGGCTTAGGGCGACG	227473502	+	GeneID:5867	RAB4A	RAB4;	NM_004578.2	GI:19923259	Oncogene RAB4; RAB4; member RAS oncogene family; go_function: GTP binding; go_function: nucleotide binding; go_function: GTPase activity; go_process: intracellular protein transport; go_process: small GTPase mediated signal transduction	RAB4A; member RAS oncogene family	638	TRUE	1:227473076-227474153
cg03826976	11	7652009	NCBI:RefSeq	36.1	CCAGGCCCAGGGTAGGCGCCCATGAGGTATGTCGAATGAATATATTCGCG	7651397	-	GeneID:51700	CYB5R2	B5R.2;	NM_016229.2	GI:47778922	isoform 1 is encoded by transcript variant 1; cytochrome b5 reductase b5R.2; go_component: membrane; go_component: soluble fraction; go_function: FAD binding; go_function: NAD binding; go_function: oxidoreductase activity; go_function: cytochrome-b5 reductase activity; go_process: electron transport; go_process: electron transport	cytochrome b5 reductase b5R.2 isoform 1	612	TRUE	11:7651155-7652414
cg03833068	6	27912937	NCBI:RefSeq	36.1	CACACATAAAATGACTCAAACTACAGCAAGCTGACGCTGATCTCACCTCG	27914343	+	GeneID:8341	HIST1H2BN	H2B/d; H2BFD; MGC9388; MGC125414; MGC125415; MGC125416;	NM_003520.3	GI:15718720	go_component: nucleus; go_component: chromosome; go_component: nucleosome; go_component: nucleosome; go_function: DNA binding; go_function: DNA binding; go_process: nucleosome assembly; go_process: nucleosome assembly; go_process: chromosome organization and biogenesis (sensu Eukaryota)	H2B histone family; member D	1406	TRUE	6:27912585-27912976
cg03835292	22	36306577	NCBI:RefSeq	36.1	CGCCTGGCCTAAGGTTCTAATTTTCTATGATGTTATGATTCATTGTCAGA	36305970	-	GeneID:3957	LGALS2	HL14; MGC75071;	NM_006498.2	GI:51173752	galectin 2; beta-galactoside-binding lectin L-14-II; lactose-binding lectin 2; S-Lac lectin 2; go_component: soluble fraction; go_function: sugar binding	lectin; galactoside-binding; soluble; 2	607	TRUE	22:36306346-36306592
cg03837750	1	74436748	NCBI:RefSeq	36.1	TTTGCTGGACTGTCACTTCCCGTTTACTTCTCATCTGTAGGCCTATGACG	74436419	-	GeneID:127255	LRRC44	MGC22773;	NM_145258.1	GI:21687083	synonym: MGC22773	leucine rich repeat containing 44	329	TRUE	1:74436070-74436782
cg03842617	7	150319489	NCBI:RefSeq	36.1	TCCTTGGTGCACTGCTTGAATCCTCTGTTCTAGACAAATGGGCTTTCTCG	150319080	+	GeneID:4846	NOS3	eNOS; ECNOS; NOS III;	NM_000603.3	GI:48762674	endothelial nitric oxide synthase; endothelial nitric oxidase synthase; go_component: cytoplasm; go_function: FAD binding; go_function: FMN binding; go_function: NADP binding; go_function: heme binding; go_function: iron ion binding; go_function: zinc ion binding; go_function: calmodulin binding; go_function: calcium ion binding; go_function: oxidoreductase activity; go_function: electron transpo…	nitric oxide synthase 3 (endothelial cell)	409	FALSE
cg03843852	15	53398391	NCBI:RefSeq	36.1	CGGTAATTGTAGACGTCAGTGTTGGTGTTAACATTTCAGGTTCGTTGCTC	53398488	+	GeneID:9488	PIGB	MGC21236;	NM_004855.3	GI:22538447	go_component: endoplasmic reticulum membrane; go_function: catalytic activity; go_process: GPI anchor biosynthesis; go_process: protein amino acid glycosylation	phosphatidylinositol glycan; class B	97	TRUE	15:53397549-53398932
cg03846288	15	57067141	NCBI:RefSeq	36.1	CGACAGTTCGGAAAGTGAGAGCGCAGTAGCCTTCACGCCTCCATTAACAT	57067157	+	GeneID:54778	RNF111	ARK; FLJ38008; DKFZp761D081; DKFZp313E0731; DKFZp686H1966;	NM_017610.6	GI:37595552	Arkadia; go_component: ubiquitin ligase complex; go_function: zinc ion binding; go_function: metal ion binding; go_function: ubiquitin-protein ligase activity; go_process: protein ubiquitination	ring finger protein 111	16	TRUE	15:57066943-57067932
cg03847636	4	7121533	NCBI:RefSeq	36.1	CGTGTGCATTTATGAGCTTTAGTTGTGCCCCAATGTTTTCTATGCGCTGT	7120701	-	GeneID:80273	GRPEL1	HMGE; FLJ25609;	NM_025196.2	GI:37059725	GrpE-like protein cochaperone; go_component: mitochondrial matrix; go_function: chaperone binding; go_function: unfolded protein binding; go_function: protein homodimerization activity; go_function: adenyl-nucleotide exchange factor activity; go_process: protein folding; go_process: protein import into mitochondrial matrix	GrpE-like 1; mitochondrial	832	TRUE	4:7119840-7121750
cg03852570	10	100165096	NCBI:RefSeq	36.1	AGTGGATTGTCAGTTTTGCCATTATCCCCTGCATCCTGGAGGTGACACCG	100164931	-	GeneID:84795	C10orf33	FLJ23849; MGC13047;	NM_032709.1	GI:14249307	go_function: FAD binding; go_function: oxidoreductase activity; acting on paired donors; with incorporation or reduction of molecular oxygen; go_process: electron transport; go_process: carotenoid biosynthesis	hypothetical protein LOC84795	165	FALSE
cg03853151	10	126097477	NCBI:RefSeq	36.1	CGCAACAGTGACGCCGGAGAGTCACTGCAACTTAAAGGCTGATTCTGCCC	126097441	-	GeneID:4942	OAT	HOGA; DKFZp781A11155;	NM_000274.1	GI:4557808	go_component: mitochondrial matrix; go_function: transferase activity; go_function: pyridoxal phosphate binding; go_function: ornithine-oxo-acid transaminase activity; go_process: ornithine metabolism; go_process: amino acid metabolism; go_process: visual perception	ornithine aminotransferase precursor	36	TRUE	10:126096379-126097943
cg03860051	10	124758598	NCBI:RefSeq	36.1	CGCCAGCCTCGAACGCACTCACCAGCCTGCTGCCGCGCAGCAACCGCACT	124758524	+	GeneID:36	ACADSB	ACAD7; SBCAD; 2-MEBCAD;	NM_001609.2	GI:38373685	2-methyl branched chain acyl-CoA dehydrogenase; 2-methylbutyryl-CoA dehydrogenase; go_component: mitochondrion; go_function: oxidoreductase activity; go_function: acyl-CoA dehydrogenase activity; go_process: lipid metabolism; go_process: electron transport; go_process: fatty acid metabolism	acyl-Coenzyme A dehydrogenase; short/branched chain precursor	74	TRUE	10:124757615-124759110
cg03860768	8	11388980	NCBI:RefSeq	36.1	ACCTCCATGCTGACTCTACAAGGTAATTTGCCCTGCCGTGTGGACAAACG	11388930	+	GeneID:640	BLK	MGC10442;	NM_001715.2	GI:33469981	BLK nonreceptor tyrosine kinase; go_function: ATP binding; go_function: nucleotide binding; go_function: transferase activity; go_function: protein-tyrosine kinase activity; go_function: protein-tyrosine kinase activity; go_process: protein kinase cascade; go_process: intracellular signaling cascade; go_process: protein amino acid phosphorylation	B lymphoid tyrosine kinase	50	FALSE
cg03861428	1	17253289	NCBI:RefSeq	36.1	AAGGTCACGGGGGAAGCCAAATGGGCATGCGCCGCTACTGCGCTATTGCG	17253233	-	GeneID:6390	SDHB	IP; SDH; PGL4; SDH1; SDHIP;	NM_003000.1	GI:9257241	iron-sulfur subunit; go_component: membrane; go_component: mitochondrion; go_function: iron ion binding; go_function: metal ion binding; go_function: oxidoreductase activity; go_function: electron transporter activity; go_function: 2 iron; 2 sulfur cluster binding; go_function: 3 iron; 4 sulfur cluster binding; go_function: 4 iron; 4 sulfur cluster binding; go_function: succinate dehydrogenase (u…	succinate dehydrogenase complex; subunit B; iron sulfur (Ip)	56	TRUE	1:17252954-17254262
cg03862760	7	1576009	NCBI:RefSeq	36.1	CGTGCAAGTCGATCCCCTAACCCAGAAAGCCCCAGGCGCGGTCTCTATGG	1576155	-	GeneID:84262	MGC10911		NM_032302.2	GI:53749659		hypothetical protein LOC84262	146	TRUE	7:1575418-1576922
cg03866607	17	56887608	NCBI:RefSeq	36.1	CGGGCAGGCTGGCCTCTCAGGCTGTGCTCTCATCCCGAGGCCCCAGGACC	56888589	+	GeneID:9496	TBX4	SPS;	NM_018488.2	GI:18129689	go_component: nucleus; go_function: transcription factor activity; go_process: transcription; go_process: development; go_process: regulation of transcription; DNA-dependent	T-box 4	981	TRUE	17:56886380-56887615
cg03870862	8	144695368	NCBI:RefSeq	36.1	TTCTACTTTTAACCTTTTGTGGAATCTCCATAGTTTTCTGCGGTGCTGCG	144694746	-	GeneID:23144	ZC3H3	ZC3HDC3; KIAA0150;	NM_015117.1	GI:30794493	zinc finger CCCH type domain containing 3; go_function: metal ion binding; go_function: nucleic acid binding	zinc finger CCCH-type domain containing 3	622	TRUE	8:144695305-144695622
cg03872267	15	86812208	NCBI:RefSeq	36.1	CGGCCAAGCAGAAAGTTGAACAGAACGCGGCTCCCAGCCACACCAAGTTC	86811623	-	GeneID:26589	MRPL46	LIECG2; P2ECSL; C15orf4; MGC22762;	NM_022163.2	GI:26667176	go_component: mitochondrion; go_component: ribonucleoprotein complex	mitochondrial ribosomal protein L46	585	TRUE	15:86811255-86812360
cg03873930	20	61811108	NCBI:RefSeq	36.1	CGCCTGAACACAGACACAGCTGTCAAAGCACGCCTGCCCCAGGAAGCTGA	61809809	-	GeneID:10139	ARFRP1	ARP;	NM_003224.2	GI:33466360	ARF-related protein; ADP-ribosylation factor-related protein 1; go_component: Golgi stack; go_component: membrane fraction; go_function: GTP binding; go_function: nucleotide binding; go_function: GTPase activity; go_function: protein binding; go_process: signal transduction; go_process: intracellular protein transport; go_process: small GTPase mediated signal transduction	ADP-ribosylation factor related protein 1	1299	TRUE	20:61808609-61811354
cg03874127	6	109275828	NCBI:RefSeq	36.1	CGTGCATACACTCTGCGAACTGAAGGGCTGTACAAATGCAAGGGCTTAAT	109276318	+	GeneID:84071	ARMC2	bA787I22.1; DKFZP434P0714; RP11-787I22.1;	NM_032131.3	GI:34222278	go_function: binding	armadillo repeat containing 2	490	TRUE	6:109275647-109275848
cg03879902	19	50863712	NCBI:RefSeq	36.1	CGGAGGGACAGAATGAGACCCCCAGCCAGAGACCAGAGAAAAACAAACAG	50863342	+	GeneID:2696	GIPR	MGC126722;	NM_000164.2	GI:45545425	go_component: plasma membrane; go_component: integral to membrane; go_function: G-protein coupled receptor activity; go_function: gastric inhibitory peptide receptor activity; go_process: response to nutrient; go_process: adenylate cyclase activation; go_process: generation of precursor metabolites and energy; go_process: G-protein coupled receptor protein signaling pathway	gastric inhibitory polypeptide receptor	370	TRUE	19:50863610-50864030
cg03900104	19	50600964	NCBI:RefSeq	36.1	GCCCCAGGGAGCGTGTAAACAGCGGCACGTGGACACAGATTTGGGGGACG	50600129	-	GeneID:10848	PPP1R13L	RAI; IASPP; NKIP1; iASPP gene;	NM_006663.2	GI:63003906	RelA-associated inhibitor; NFkB interacting protein 1; inhibitor of apoptosis stimulating protein of p53; go_component: nucleus; go_function: transcription factor binding; go_function: transcription corepressor activity; go_process: apoptosis; go_process: transcription; go_process: regulation of transcription; DNA-dependent	protein phosphatase 1; regulatory (inhibitor) subunit 13 like	835	TRUE	19:50600158-50602163
cg03902905	2	44355766	NCBI:RefSeq	36.1	AGGAGAATCGTTTGACCCCGGAAGACAGACGTTGCAGTGAGCCGAGATCG	44356103	+	GeneID:6519	SLC3A1	D2H; ATR1; NBAT; RBAT; CSNU1;	NM_000341.2	GI:23308570	solute carrier family 3 (cystine; dibasic and neutral amino acid transporters); member 1; amino acid transporter 1; SLC3A1 variant F; SLC3A1 variant G; SLC3A1 variant B; SLC3A1 variant C; SLC3A1 variant D; SLC3A1 variant E; go_component: membrane; go_component: membrane fraction; go_component: integral to plasma membrane; go_function: alpha-amylase activity; go_function: L-cystine transporter act…	solute carrier family 3; member 1	337	TRUE	2:44355696-44355932
cg03909500	5	33972354	NCBI:RefSeq	36.1	TGTACATAAGGACCTAGGGACTCCGAGCTTGGCCTGAGAACCCTTGGACG	33972246	+	GeneID:51289	RLN3R1	SALPR; GPCR135;	NM_016568.1	GI:7706102	somatostatin and angiotensin-like peptide receptor; G-protein coupled receptor SALPR; go_component: integral to plasma membrane; go_function: receptor activity; go_function: rhodopsin-like receptor activity; go_function: N-formyl peptide receptor activity; go_process: signal transduction; go_process: G-protein coupled receptor protein signaling pathway	relaxin 3 receptor 1	108	TRUE	5:33971758-33974643
cg03912013	3	45705493	NCBI:RefSeq	36.1	CTTTACAAGACCCAGTAGTACATGGGTCAAGTGTGGCAAAACAGACATCG	45705947	+	GeneID:22908	SACM1L	SAC1; KIAA0851; DKFZp686A0231;	NM_014016.2	GI:41281578	synonyms: SAC1; KIAA0851; DKFZp686A0231	suppressor of actin 1	454	TRUE	3:45705432-45706421
cg03914452	7	155156906	NCBI:RefSeq	36.1	CGAATAAAGTCTTTAGTGCATGAATTAAATGATTTGTCAGGTTGTTTTTA	155158335	+	GeneID:92454	PRR8	MGC20460;	NM_053043.1	GI:16596683	synonym: MGC20460	hypothetical protein LOC92454	1429	FALSE
cg03916421	4	130232911	NCBI:RefSeq	36.1	CGGCTGGTTTGAGTGTAATATTGATGTAAATTGAATTGGAATATTTATAT	130234356	+	GeneID:132321	LOC132321		NM_173487.1	GI:27735074		hypothetical protein LOC132321	1445	FALSE
cg03916787	9	126664529	NCBI:RefSeq	36.1	ACTGCCTCCCCAGAACCTTTATGGAGTTGGATTATAACTGCCTGAGCCCG	126664061	-	GeneID:11224	RPL35		NM_007209.2	GI:16117792	60S ribosomal protein L35; go_component: ribosome; go_component: intracellular; go_component: nucleolus; go_component: cytosolic large ribosomal subunit (sensu Eukaryota); go_function: mRNA binding; go_function: structural constituent of ribosome; go_function: structural constituent of ribosome; go_process: protein biosynthesis; go_process: protein biosynthesis	ribosomal protein L35	468	TRUE	9:126663258-126665366
cg03919644	3	102926293	NCBI:RefSeq	36.1	CGGAGCTGAATTAAATAGTGGAGAGCAGAAAACCTAGGTTTAGATGTGCA	102926184	+	GeneID:79598	LRRIQ2	FLJ23047; 2810403B08Rik;	NM_024548.2	GI:31377704	synonyms: FLJ23047; 2810403B08Rik	leucine-rich repeats and IQ motif containing 2	109	TRUE	3:102925924-102926989
cg03919781	8	16928596	NCBI:RefSeq	36.1	CGATTGCAAATTAAGGCAAACACTTTGACGACTGAAGGGCAGCTTCCGGA	16929119	+	GeneID:286097	EFHA2		NM_181723.1	GI:32171204	EF hand domain family A2; go_function: calcium ion binding	EF hand domain family; member A2	523	TRUE	8:16928580-16929792
cg03941108	1	22858524	NCBI:RefSeq	36.1	GTACTGGGATGCTGCCCCATGGGATCTTCATCATCATACTGTGTCAGACG	22858474	+	GeneID:713	C1QB		NM_000491.2	GI:11038661	RefSeq record reflects first start codon since translation initiation site is uncertain; complement component C1q; B chain; complement subcomponent C1q chain B; go_component: cytoplasm; go_component: complement component C1q complex; go_process: immune response; go_process: phosphate transport; go_process: complement activation; classical pathway	complement component 1; q subcomponent; beta polypeptide precursor	50	FALSE
cg03945021	16	24589575	NCBI:RefSeq	36.1	ATACTGGTACAAGCTTGACCGAGCTTCTCTAACAGACACTGTGCATCACG	24589884	-	GeneID:400511	FLJ45256		NM_207448.1	GI:46409519		hypothetical protein LOC400511	309	FALSE
cg03950654	17	4560077	NCBI:RefSeq	36.1	TTCTTCACTGCAGCGTGTCAGCTCCTCCTGGTGTTTGCATTTGATCTTCG	4560538	+	GeneID:409	ARRB2	ARB2; ARR2; DKFZp686L0365;	NM_004313.3	GI:39812034	isoform 1 is encoded by transcript variant 1; go_component: nucleus; go_component: cytoplasm; go_component: plasma membrane; go_process: sensory perception; go_process: signal transduction	arrestin beta 2 isoform 1	461	TRUE	17:4559227-4561496
cg03959219	6	116681828	NCBI:RefSeq	36.1	GACTTCTTCCAAAATGAGCGGCCTGGATGGGGGCAACAAGCTCCCTCTCG	116681954	-	GeneID:23270	TSPYL4	KIAA0721; dJ486I3.2;	NM_021648.4	GI:46094050	go_component: nucleus; go_process: nucleosome assembly	TSPY-like 4	126	TRUE	6:116681086-116682127
cg03962522	22	30769254	NCBI:RefSeq	36.1	CGCAACGCTGCCACCATGGACAGTAGCACCTGGAGCCCCAAGACCACCGC	30769259	+	GeneID:6523	SLC5A1	NAGT; SGLT1; D22S675;	NM_000343.1	GI:4507030	Human Na+/glucose cotransporter 1 mRNA; complete cds; solute carrier family 5 (sodium/glucose transporter); member 1; go_component: membrane; go_component: integral to plasma membrane; go_function: sodium ion binding; go_function: symporter activity; go_function: transporter activity; go_function: sugar porter activity; go_function: glucose:sodium symporter activity; go_process: ion transport; go…	solute carrier family 5 (sodium/glucose cotransporter); member 1	5	TRUE	22:30769023-30769564
cg03964111	7	150129426	NCBI:RefSeq	36.1	CGGCCCTGTGACCAGGACAGCCATTCATTGGGTGACTTTGAGCCACCACT	150129296	-	GeneID:28959	LR8	FLJ26014; MGC110857;	NM_014020.2	GI:21361500	LR8-like protein; go_process: organ morphogenesis	LR8 protein	130	FALSE
cg03969797	15	21361757	NCBI:RefSeq	36.1	GTGCTCTGCCTGGTTTTTACCGCAATTTTCCAATCTGACATATTTTTTCG	21361547	+	GeneID:7681	MKRN3	D15S9; RNF63; ZFP127; ZNF127; MGC88288;	NM_005664.2	GI:74272285	zinc finger protein 127; go_component: ubiquitin ligase complex; go_component: ribonucleoprotein complex; go_function: zinc ion binding; go_function: metal ion binding; go_function: nucleic acid binding; go_function: ubiquitin-protein ligase activity; go_process: protein ubiquitination	makorin; ring finger protein; 3	210	TRUE	15:21361624-21362006
cg03969997	7	72894801	NCBI:RefSeq	36.1	CATTGCGGGCAGGCGGTGAGGGTGTGGCCAGGGTCGCAACACAGGCCCCG	72894791	-	GeneID:155368	WBSCR27	MGC40131;	NM_152559.2	GI:30795189	synonym: MGC40131	Williams-Beuren syndrome chromosome region 27	10	TRUE	7:72894526-72894956
cg03977657	1	207892370	NCBI:RefSeq	36.1	AGACAGGTAACATACCTTGCTGTGTGTTCTGCCGTTCTTTCTCCAGATCG	207892443	-	GeneID:3914	LAMB3	LAMNB1;	NM_000228.2	GI:62868214	laminin; beta 3 (nicein (125kD); kalinin (140kD); BM600 (125kD)); nicein-125kDa; kalinin-140kDa; BM600-125kDa; go_component: laminin-5; go_component: basement membrane; go_component: extracellular matrix (sensu Metazoa); go_function: protein binding; go_function: structural molecule activity; go_process: cell adhesion; go_process: epidermis development	laminin subunit beta 3 precursor	73	FALSE
cg03985136	6	150304427	NCBI:RefSeq	36.1	CGCCAGTTCCCAGTGGACGTGATTACAGTCCGGGCTAGGTTTTATTATTT	150304829	+	GeneID:80328	ULBP2	N2DL2; RAET1H;	NM_025217.2	GI:20070345	UL16-binding protein 2; ALCAN-alpha; retinoic acid early transcript 1 H; NKG2D ligand 2; go_component: membrane; go_component: MHC class I protein complex; go_function: MHC class I receptor activity; go_process: antigen presentation; go_process: natural killer cell activation	UL16 binding protein 2	402	TRUE	6:150304015-150305371
cg03996465	13	52124744	NCBI:RefSeq	36.1	CGCCAGCGGGCACTCCCACGGAGCTTTCAGTAGTACTTTAGAAGCACTTT	52125002	+	GeneID:10910	SUGT1	SGT1;	NM_006704.2	GI:14165471	suppressor of G2 allele of SKP1; S. cerevisiae; homolog of; SGT1B protein; go_component: kinetochore; go_component: ubiquitin ligase complex; go_function: binding; go_process: mitosis; go_process: ubiquitin cycle; go_process: regulation of progression through cell cycle; go_process: centromere and kinetochore complex maturation	suppressor of G2 allele of SKP1	258	TRUE	13:52124197-52125526
cg04000821	19	59705878	NCBI:RefSeq	36.1	CGGGCAGGAGGCCCCCGGCCAGCACATCCTGTCTGCTTGTGTCTGCTGCA	59705825	+	GeneID:3904	LAIR2	CD306; MGC71634;	NM_002288.3	GI:32481203	isoform a is encoded by transcript variant 1; go_function: receptor activity	leukocyte-associated Ig-like receptor 2 isoform a	53	FALSE
cg04007936	16	8861518	NCBI:RefSeq	36.1	CGCCACGTTTGGATCCCTGAGCAGCTGTCACAAGCCTGCACCCAGGACTG	8860694	-	GeneID:23589	CARHSP1	CSDC1; CRHSP-24;	NM_014316.1	GI:7656994	calcium regulated heat stable protein 1 (24kD); go_function: DNA binding; go_function: phosphatase binding; go_process: intracellular signaling cascade; go_process: regulation of transcription; DNA-dependent	calcium-regulated heat-stable protein (24kD)	824	FALSE
cg04009666	17	59923589	NCBI:RefSeq	36.1	CGGATCCCAACAAGCCACCACTACCGTTAACAGAATCCGGAGAGGCCACG	59923631	-	GeneID:11232	POLG2	HP55; POLB; POLGB; MTPOLB;	NM_007215.2	GI:70887789	mitochondrial DNA polymerase; accessory subunit; go_component: mitochondrion; go_component: mitochondrial chromosome; go_function: ATP binding; go_function: transferase activity; go_function: single-stranded DNA binding; go_function: glycine-tRNA ligase activity; go_function: gamma DNA-directed DNA polymerase activity; go_process: DNA repair; go_process: protein biosynthesis; go_process: glycyl-t…	polymerase (DNA directed); gamma 2; accessory subunit	42	TRUE	17:59923000-59923925
cg04019407	17	44401303	NCBI:RefSeq	36.1	GTTGCCCTCAGTTAGAAGGGATACTTGTAGGCCAGGCGCGATGAATCACG	44400954	-	GeneID:2695	GIP		NM_004123.2	GI:62243447	glucose-dependent insulinotropic polypeptide; go_component: extracellular region; go_component: soluble fraction; go_function: hormone activity; go_process: signal transduction	gastric inhibitory polypeptide preproprotein	349	TRUE	17:44401240-44402001
cg04025889	20	32354750	NCBI:RefSeq	36.1	CGAGTGCCGCCAGCATGTCTGACAAACTGCCCTACAAAGTCGGTGAGTCC	32354784	-	GeneID:191	AHCY	SAHH;	NM_000687.1	GI:9951914	adenosylhomocysteinase; go_component: cytoplasm; go_function: hydrolase activity; go_function: adenosylhomocysteinase activity; go_function: adenosylhomocysteinase activity; go_process: one-carbon compound metabolism; go_process: one-carbon compound metabolism	S-adenosylhomocysteine hydrolase	34	TRUE	20:32354217-32355507
cg04036898	1	46437185	NCBI:RefSeq	36.1	CGCCTACCTCATGGGGTTGTTGTGGAATTAAACATCATCAGTAAGGTGCT	46436685	-	GeneID:55624	POMGNT1	MEB; GnTI.2; MGAT1.2; FLJ20277;	NM_017739.1	GI:8923252	UDP-GlcNAc; go_component: Golgi stack; go_component: Golgi membrane; go_component: integral to membrane; go_function: manganese ion binding; go_function: transferase activity; transferring glycosyl groups; go_function: alpha-1;3-mannosylglycoprotein 2-beta-N-acetylglucosaminyltransferase activity; go_process: protein amino acid N-linked glycosylation	O-linked mannose beta1;2-N-acetylglucosaminyltransferase	500	TRUE	1:46437137-46437545
cg04039225	3	171112210	NCBI:RefSeq	36.1	ACCATACAAAGACTTTCTGGCCTTCAACTGCAGAAGCTTCTCTGGCTGCG	171112176	+	GeneID:344658	SAMD7	DKFZp686E1583;	NM_182610.1	GI:32699037	synonym: DKFZp686E1583	sterile alpha motif domain containing 7	34	FALSE
cg04042106	11	65385312	NCBI:RefSeq	36.1	GAATCCGGCAGCTGCGAGGATCTGGGATGCAACCTACTCAGATGGTTACG	65384525	+	GeneID:80198	MUS81	FLJ21012; FLJ44872;	NM_025128.3	GI:34147593	go_component: nucleus; go_function: nuclease activity; go_function: hydrolase activity; go_function: nucleic acid binding; go_function: endonuclease activity; go_function: magnesium ion binding; go_function: crossover junction endodeoxyribonuclease activity; go_process: DNA repair; go_process: DNA metabolism; go_process: DNA recombination	MUS81 endonuclease homolog	787	TRUE	11:65384240-65385331
cg04044561	7	100141775	NCBI:RefSeq	36.1	CTGGCTGGCTGCTTGCACCCACATCCTTCTTTCTCTGGGACCTGGGGTCG	100141705	+	GeneID:10248	POP7	RPP2; RPP20; 0610037N12Rik;	NM_005837.1	GI:5032046	ribonuclease P protein subunit p20; POP7 (processing of precursor; S. cerevisiae) homolog; go_component: nucleus; go_component: nucleolar ribonuclease P complex; go_function: hydrolase activity; go_function: protein binding; go_function: nucleic acid binding; go_function: ribonuclease P activity; go_process: tRNA processing	processing of precursor 7; ribonuclease P subunit	70	TRUE	7:100140942-100142901
cg04051458	15	37660352	NCBI:RefSeq	36.1	GGGGGTCGGGGCTTGGGAGCACTAGAACTTCTCAGAAAAGTCGGTGCCCG	37660572	+	GeneID:7057	THBS1	TSP; THBS; TSP1;	NM_003246.2	GI:40317625	thrombospondin-1p180; go_component: extracellular region; go_function: heparin binding; go_function: protein binding; go_function: calcium ion binding; go_function: structural molecule activity; go_function: signal transducer activity; go_function: endopeptidase inhibitor activity; go_process: cell motility; go_process: cell adhesion; go_process: development; go_process: blood coagulation; go_pro…	thrombospondin 1 precursor	220	TRUE	15:37659656-37660910
cg04057053	1	112810449	NCBI:RefSeq	36.1	CGCCCCCTGGTGTTTCACATGCTGTGAATCTCTCACGACCGAGGTCTGGC	112811563	+	GeneID:7482	WNT2B	WNT13; XWNT2;	NM_004185.2	GI:13518016	isoform WNT-2B1 is encoded by transcript variant WNT-2B1; XWNT2; Xenopus; homolog of; wingless-type MMTV integration site family; member 13; go_component: extracellular region; go_component: extracellular space; go_function: signal transducer activity; go_process: development; go_process: protein folding; go_process: morphogenesis; go_process: frizzled-2 signaling pathway	wingless-type MMTV integration site family; member 2B isoform WNT-2B1	1114	TRUE	1:112810045-112810760
cg04057106	9	34253427	NCBI:RefSeq	36.1	GCTTGAACTCTGGGACTTGAGGGTAGGTCCCAGCGTCTGTCTGTTCCCCG	34253109	-	GeneID:347240	C9orf48	FLJ43884;	NM_194313.1	GI:34916049	go_component: microtubule associated complex; go_function: ATP binding; go_function: microtubule motor activity; go_process: microtubule-based movement	hypothetical protein LOC347240	318	FALSE
cg04057485	19	51819205	NCBI:RefSeq	36.1	GTTCGTGGCCGGTGTGGTGGGCAACGGGCTGGCCCTGGGCATCCTGAGCG	51820194	-	GeneID:5739	PTGIR	IP; PRIPR;	NM_000960.3	GI:39995095	prostacyclin receptor; prostanoid IP receptor; PGI receptor; go_component: integral to plasma membrane; go_function: receptor activity; go_function: thromboxane receptor activity; go_function: rhodopsin-like receptor activity; go_process: signal transduction; go_process: cell-cell signaling; go_process: G-protein signaling; coupled to cyclic nucleotide second messenger	prostaglandin I2 (prostacyclin) receptor (IP)	989	TRUE	19:51818570-51819382
[truncated: 4,985 more rows]
