# Supplementary material for: Ancestry Dependent DNA Methylation and Influence of Maternal Nutrition
Source: PLoS One. 2015 Mar 5;10(3):e0118466. doi: 10.1371/journal.pone.0118466 (PMC4350920; doi:10.1371/journal.pone.0118466)
Supplement: S3 Data — This provides the list of ancestry-specific CpGs and enriched gene functions. (XLSX) [file pone.0118466.s003.xlsx]

## Sheet: AncestryMarkers
Data S3a: Ancestry specific CpG sites
This is the list of genes with consistent differential methylation between AA vs. EA in CANDLE and YRI vs. CEU in HapMap
																			Average M-values in CANDLE cordbllod	Average M-values in AA in CANDLE	Average M-values in EA in CANDLE	Difference between AA-avgM and EA_avgM (negative sign means lower methylaion in AA and positive sign means higher methylation in AA)	Linear regression model: methylation M-values regressed on race with lymphocyte and granulocyte proportions and maternal age as covariates					Average M-values in HapMap	Average M-values in YRI in HapMap	Average M-values in CEU in HapMap	Difference betweenYRI_avgM and CEU_avgM (negative sign means lower methylaion in YRI and positive sign means higher methylation in YRI)	Wilcoxon raw p-values for AA vs EA (from Fraser et al. 2012)	cis-meQTL marker information in CANDLE AA (CBA) and CANDLE EA (CBB) from Smith et al., 2014
ProbeID	Gene Symbol	Chr	Mb	Gene Id	Strand Gene	GenomeBuild	Source	SourceSeq	TSS_Coordinate	Gene_Strand	Synonym	Accession	GID	Annotation	Product	Distance_to_TSS	CPG_ISLAND	CPG_ISLAND_LOCATIONS	CANDLE_avgM	AA_avgM	EA_avgM	AA - EU	AA_EA_RegressionCoefficient	AA_EA_Std. Error	AA_EA_t value	AA_EA_Pr(>|t|)	AA_EA_Pr(>|t|)_BHFDR_Adjusted	HapMap_avgM	YRI_avgM	CEU_avgM	YRI - CEU	HapMap_rawP	uniqueids	SNP	Chr of untitled	CpG	GeneName	CpG.bp	SNP.bp	CBA_t	CBA_p	CBA_p_holms	CBB_t	CBB_p	CBB_p_holms
cg15915418	TLE1	9	83.4934	7088	-	36.1	NCBI:RefSeq	GGGCAAACAAATCCAGACGGACTGCTTTTCTTTGCTCTTCTCCTGGTCCG	83493416	-	ESG; ESG1; GRG1;	NM_005077.3	GI:34147712	transducin-like enhancer of split 1; homolog of Drosophila E(sp1); enhancer of split groucho 1; go_component: nucleus; go_process: development; go_process: organ morphogenesis; go_process: signal transduction; go_process: frizzled signaling pathway; go_process: regulation of transcription; DNA-dependent	transducin-like enhancer protein 1	5	TRUE	9:83491798-83495523	-1.73651	-2.36522	-0.962709	-1.40251	1.24696	0.296923	4.19961	4.03967e-05	0.00110341	-1.75205	-2.02265	-1.48145	-0.541196	0.0137128
cg06409153	ABCA5	17	64.8355	23461	-	36.1	NCBI:RefSeq	CGGCAGATGCTGAATTTTCCAAACGGCCTGAGACACATGACATCTGTGAG	64834885	-	ABC13; EST90625;	NM_018672.2	GI:27262623	ATP-binding cassette A5; go_function: ATP binding; go_function: ATPase activity; go_function: nucleotide binding	ATP-binding cassette; sub-family A ; member 5	663	TRUE	17:64834269-64835587	-2.81931	-3.01871	-2.57388	-0.44483	0.505412	0.0841413	6.0067	8.92509e-09	1.33197e-06	-3.29278	-3.63302	-2.95254	-0.680483	0.00186283
cg27063525	C6orf68	6	118.104	116150	+	36.1	NCBI:RefSeq	CCACAAGAGTATGACGGGGCTGTACGAGCTGGTGTGGCGGGTGCTGCACG	118103363	+	MGC7199; MGC:7199; MGC117249;	NM_138459.2	GI:34147547	go_function: transferase activity; go_process: metabolism	hypothetical protein LOC116150	202	TRUE	6:118102930-118104459	-3.15602	-3.57417	-2.64138	-0.932785	0.917909	0.296845	3.09221	0.00227334	0.0200083	-4.65038	-5.10649	-4.19427	-0.912223	0.0329386
cg23159337	ATP13A4	3	194.755	84239	-	36.1	NCBI:RefSeq	TGCAATAAGCAGGGAGCAGCCAGCAATTCCTCCTAGCAGAGGGCGACTCG	194755390	-	MGC126545; DKFZp761I1011;	NM_032279.2	GI:66932948	cation-transporting P5-ATPase; go_component: membrane; go_component: integral to membrane; go_function: ATP binding; go_function: ATPase activity; go_function: ATPase activity; coupled to transmembrane movement of ions; phosphorylative mechanism; go_function: hydrolase activity; acting on acid anhydrides; catalyzing transmembrane movement of substances; go_process: cation transport	ATPase type 13A4	82	TRUE	3:194755282-194755489	-0.591971	-0.81025	-0.323319	-0.486931	0.558354	0.104372	5.34964	2.42136e-07	2.06066e-05	-1.78698	-2.01053	-1.56343	-0.447108	0.00852256	cg23159337rs10804955	rs10804955	3	cg23159337	ATP13A4	194755472	194779629	-10.2073	2.55e-16	TRUE	15.8452	4.21e-27	TRUE
cg08707819	RCOR1	14	102.129	23186	+	36.1	NCBI:RefSeq	CGCCGCCGCCTCAGCCGCCGCCGCCCCCAATAATGGCCAGAATAAAAGTT	102128986	+	RCOR; COREST; KIAA0071;	NM_015156.1	GI:7661891	go_component: nucleus; go_function: DNA binding; go_function: protein binding; go_process: regulation of transcription	REST corepressor 1	158	TRUE	14:102127493-102129857	-1.76706	-1.89527	-1.60926	-0.28601	0.289791	0.0529163	5.47641	1.30674e-07	1.30012e-05	-1.22851	-1.33885	-1.11817	-0.220682	3.73342e-08
cg13315147	CYP2E1	10	135.192	1571	+	36.1	NCBI:RefSeq	CGGCGTTATCAGTTCATTTAACGTTTAGGTTTGTTGGCCCATTCAGTGTT	135190857	+	CPE1; CYP2E; P450-J; P450C2E;	NM_000773.3	GI:75709190	microsomal monooxygenase; xenobiotic monooxygenase; flavoprotein-linked monooxygenase; cytochrome P450; subfamily IIE (ethanol-inducible); polypeptide 1; putative cytochrome P450 2E1; go_component: membrane; go_component: microsome; go_component: endoplasmic reticulum; go_function: heme binding; go_function: iron ion binding; go_function: metal ion binding; go_function: oxygen binding; go_functio…	cytochrome P450; family 2; subfamily E; polypeptide 1	661	TRUE	10:135191138-135192648	-2.40229	-3.00598	-1.65929	-1.34669	1.46985	0.324788	4.52556	1.03783e-05	0.000395817	-1.75234	-2.33354	-1.17114	-1.1624	0.000803484
cg11375102	C16orf30	16	1.52381	79652	+	36.1	NCBI:RefSeq	CGGGTTCACAGCTCCTCTGTGCTGCCTGGGCCCCTGTGTGGATGCCTCCA	1523659	+	CLP24; FLJ20898;	NM_024600.1	GI:13375800	go_component: integral to membrane	claudin-like protein 24	152	TRUE	16:1523788-1524691	-0.878663	-1.06729	-0.646501	-0.420793	0.4325	0.105581	4.09639	6.11485e-05	0.00149923	-2.79162	-3.09786	-2.48538	-0.612484	0.00874021	cg11375102rs2064291	rs2064291	16	cg11375102	C16orf30	1523811	1519012	10.0134	5.32e-14	TRUE	6.9264	7.74e-10	TRUE
cg12883767	SLC26A10	12	56.2994	65012	+	36.1	NCBI:RefSeq	GAGTCTCTATGTTAGGCGTTTCTGCAGACATCCTTGGCCGGATCTGATCG	56299960	+		NM_133489.2	GI:65506788	isoform 2 is encoded by transcript variant 2; go_component: integral to membrane; go_function: transporter activity; go_process: transport	solute carrier family 26; member 10 isoform 2	584	TRUE	12:56299188-56300079	-2.34465	-2.47755	-2.18109	-0.296461	0.281008	0.0577414	4.86665	2.31318e-06	0.000124712	0.572648	0.330045	0.815252	-0.485207	0.0112974
cg14384940	C21orf81	21	14.2747	114035	-	36.1	NCBI:RefSeq	CGCCCCTAACCCGCCGCCAGCTATTGGACCCGGGATGGCGCCCCTAACAC	14274636	-		NM_153750.1	GI:24371249		hypothetical protein LOC114035	25	TRUE	21:14273649-14275990	0.127697	0.0352476	0.241481	-0.206234	0.214415	0.0628636	3.4108	0.000785046	0.00962383	-0.213818	-0.522896	0.0952594	-0.618156	9.44371e-14
cg20755353	SSU72	1	1.50075	29101	-	36.1	NCBI:RefSeq	CGGGAGAGGGAGTGATAATGATTGTCAACCTAATAACAGGCTAACTGAAA	1500125	-	HSPC182; FLJ13048; PNAS-120;	NM_014188.2	GI:46370096	synonyms: HSPC182; FLJ13048; PNAS-120	Ssu72 RNA polymerase II CTD phosphatase homolog	621	TRUE	1:1499252-1501362	-4.1865	-4.32095	-4.02102	-0.299931	0.313785	0.0448593	6.99487	3.99517e-11	1.61334e-08	-4.25775	-4.58227	-3.93324	-0.649028	9.76533e-09
cg14159672	FLJ32569	1	204.086	148811	-	36.1	NCBI:RefSeq	CGCAAACGCACCGCTGAGCCATGCTTCTCTCGAGCTCCTGCTGTCAGGCT	204085868	-		NM_152491.3	GI:47458826	go_function: hydrolase activity; go_function: carboxypeptidase activity; go_function: metallopeptidase activity; go_function: protein dimerization activity; go_process: proteolysis and peptidolysis	hypothetical protein LOC148811	66	TRUE	1:204085476-204086074	-2.15351	-2.50317	-1.72315	-0.780015	0.838081	0.230956	3.62875	0.000362448	0.00554578	-2.97844	-4.86231	-1.09457	-3.76774	1.29681e-15	cg14159672rs11240574	rs11240574	1	cg14159672	FLJ32569	204085802	204080295	-8.30835	1.3e-11	TRUE	7.52053	7.94e-11	TRUE
cg12585282	PABPC4	1	39.8153	8761	-	36.1	NCBI:RefSeq	TAAACCTCATGCGTGTGTGCAGGTTAAATGGCTCCTAGGTTCCATTCCCG	39815003	-	APP1; APP-1; PABP4; iPABP;	NM_003819.2	GI:6552335	inducible poly(A)-binding protein; poly(A)-binding protein; cytoplasmic 4 (inducible form); go_component: cytoplasm; go_function: RNA binding; go_function: nucleotide binding; go_function: poly(A) binding; go_function: protein binding; go_function: nucleic acid binding; go_process: RNA catabolism; go_process: RNA processing; go_process: blood coagulation; go_process: protein biosynthesis; go_proc…	poly A binding protein; cytoplasmic 4	311	TRUE	1:39813451-39815722	-3.75404	-3.82884	-3.66197	-0.166873	0.14751	0.0361141	4.08455	6.40947e-05	0.00155298	-3.32478	-3.49056	-3.15901	-0.331551	8.82119e-05
cg04553559	ZNF703	8	37.6718	80139	+	36.1	NCBI:RefSeq	ACTTGCAGGCTTCAGACAAGACGGGCTCAAAGTAGTTGGAGCTGCCTACG	37672459	+	ZNF503L; FLJ14299;	NM_025069.1	GI:13376610	go_component: nucleus; go_function: zinc ion binding; go_function: metal ion binding; go_function: nucleic acid binding	zinc finger protein 703	644	TRUE	8:37670960-37675492	-4.47017	-4.62788	-4.27606	-0.351816	0.335012	0.0618368	5.41767	1.74115e-07	1.6374e-05	-4.52678	-4.67309	-4.38047	-0.292622	8.92652e-05
cg14893161	FLJ32569	1	204.086	148811	-	36.1	NCBI:RefSeq	TTCTCTCGAGCTCCTGCTGTCAGGCTACCGGGGTAGTTCTGACCTAAACG	204085868	-		NM_152491.3	GI:47458826	go_function: hydrolase activity; go_function: carboxypeptidase activity; go_function: metallopeptidase activity; go_function: protein dimerization activity; go_process: proteolysis and peptidolysis	hypothetical protein LOC148811	6	TRUE	1:204085476-204086074	-1.13362	-1.51781	-0.660764	-0.857043	0.883712	0.212588	4.15692	4.79959e-05	0.00125123	-2.16545	-3.31845	-1.01245	-2.30599	1.14342e-17	cg14893161rs11240574	rs11240574	1	cg14893161	FLJ32569	204085874	204080295	-7.19404	1.07e-09	TRUE	7.22778	2.9e-10	TRUE
cg01804429	YTHDC1	4	68.8987	91746	-	36.1	NCBI:RefSeq	CACCTGAAACTCTTAGTGCAGGGCCTAACAGGCCTTCTTAGCTAGAGTCG	68898402	-	YT521; YT521-B; KIAA1966;	NM_133370.1	GI:21166354	isoform 2 is encoded by transcript variant 2; splicing factor YT521-B; ENSG00000083896; go_component: nucleus; go_process: nuclear mRNA splicing; via spliceosome	splicing factor YT521-B isoform 2	270	TRUE	4:68897684-68899122	-0.226772	-0.270289	-0.173213	-0.0970758	0.0945152	0.0348509	2.71198	0.00727659	0.0441288	-0.503048	-0.71248	-0.293616	-0.418863	0.015813
cg05968233	ALKBH7	19	6.32328	84266	+	36.1	NCBI:RefSeq	CGGAGACGGGGAAATGAATGATACCTCGCTCTGACCTTTGACCATAAGCC	6323444	+	SPATA11; UNQ6002; MGC10974;	NM_032306.2	GI:39930600	spermatogenesis cell proliferation related protein	spermatogenesis associated 11	167	TRUE	19:6322885-6324791	-2.03082	-2.22501	-1.79182	-0.433188	0.409763	0.0755534	5.42349	1.69254e-07	1.61379e-05	-2.99209	-3.55171	-2.43247	-1.11924	1.93021e-05
cg24235633	CDIPT	16	29.7827	10423	-	36.1	NCBI:RefSeq	CGCTATAAAACCCTTGGAGTCTGCAGAGGTTCCGCAGCCTCGTTGCTAGG	29782012	-	PIS; PIS1; MGC1328;	NM_145752.1	GI:22027474	isoform 2 is encoded by transcript variant 2; PtdIns synthase; PI synthase; phosphatidylinositol synthase; go_component: integral to membrane; go_component: endoplasmic reticulum; go_function: transferase activity; go_function: magnesium ion binding; go_function: manganese ion binding; go_function: phosphatidylinositol transporter activity; go_function: CDP-diacylglycerol-inositol 3-phosphatidylt…	CDP-diacylglycerol--inositol 3-phosphatidyltransferase isoform 2	666	TRUE	16:29782371-29782821	3.58524	3.42492	3.78256	-0.357643	0.273868	0.0902838	3.03342	0.00274208	0.0228266	3.22899	3.13301	3.32497	-0.191961	0.00115975
cg20744464	MFI2	3	198.241	4241	-	36.1	NCBI:RefSeq	CGCGCCCTAGAAAGACTCCAGATACCGTGTCTAACTGGAGAGAGAAAAGC	198241039	-	MTF1; CD228; MAP97; MGC4856;	NM_033316.2	GI:16933548	isoform 2; precursor is encoded by transcript variant 2; melanotransferrin; melanoma-associated antigen p97; melanoma-associated antigen p97; isoform 2; go_component: membrane; go_component: extracellular region; go_component: integral to plasma membrane; go_function: zinc ion binding; go_function: metal ion binding; go_function: ferric iron binding; go_process: ion transport; go_process: iron io…	melanoma-associated antigen p97 isoform 2; precursor	233	TRUE	3:198240117-198241409	-4.83563	-5.26485	-4.30736	-0.95749	0.989546	0.089689	11.0331	2.26845e-22	2.33594e-18	-8.59336	-9.29695	-7.88977	-1.40718	1.06068e-05
cg06530118	CLN3	16	28.4109	1201	-	36.1	NCBI:RefSeq	CGGCCTCTGCATAGTGCAGAACATTCTGCTGCTCTTAAAGGTACAGGCCT	28410717	-	BTS; MGC102840;	NM_000086.1	GI:4502888	battenin; Batten disease; go_component: lysosome; go_component: membrane; go_component: mitochondrion; go_component: integral to membrane; go_function: unfolded protein binding; go_process: protein folding	CLN3 protein	163	TRUE	16:28410172-28411134	-5.17824	-5.25814	-5.0799	-0.178243	0.164687	0.0452526	3.63928	0.000348841	0.00541808	-5.35902	-5.46184	-5.2562	-0.20564	0.00516483
cg21516384	KIAA1618	17	75.8484	57714	+	36.1	NCBI:RefSeq	CGGAGGTCCCTGGTCACACCATGAGCCTCACAGATGGGAAAACTGAGGCA	75849262	+		NM_020954.2	GI:66529202	go_component: intracellular; go_function: catalytic activity; go_function: transcription factor activity; go_process: regulation of transcription; DNA-dependent	hypothetical protein LOC57714	828	TRUE	17:75848083-75849975	-3.91415	-4.12022	-3.66051	-0.459708	0.456679	0.0965121	4.73183	4.22657e-06	0.000199647	-4.49791	-4.79411	-4.20171	-0.592395	5.21251e-06
cg11323731	AKR1A1	1	45.7894	10327	+	36.1	NCBI:RefSeq	CGGGGTGCAGAACTGAGCCCAGGCCACAGTACCCTATTCACGCTCTGTGC	45789085	+	ALR; ALDR1; MGC1380; MGC12529;	NM_006066.2	GI:24497575	aldehyde reductase; alcohol dehydrogenase; go_function: protein binding; go_function: oxidoreductase activity; go_function: aldehyde reductase activity; go_function: electron transporter activity; go_function: alcohol dehydrogenase (NADP+) activity; go_process: glucose metabolism; go_process: aldehyde metabolism	aldo-keto reductase family 1; member A1	270	TRUE	1:45788813-45789434	-3.93299	-4.00163	-3.8485	-0.153123	0.17878	0.0436036	4.10012	6.02465e-05	0.00148418	-4.27064	-4.35221	-4.18907	-0.163139	0.0140447
cg06420088	MUC1	1	153.43	4582	-	36.1	NCBI:RefSeq	AAAGCTCCCAGCCGTCCACCATGCTGTGCGTTCCTCCCTCCCTGGCCACG	153429324	-	EMA; PEM; PUM; MAM6; PEMT; CD227; H23AG; mucin;	NM_002456.4	GI:65301116	isoform 1 precursor is encoded by transcript variant 1; peanut-reactive urinary mucin; episialin; polymorphic epithelial mucin; epithelial membrane antigen; DF3 antigen; H23 antigen; tumor associated epithelial mucin; tumor mucin antigen; breast carcinoma-associated antigen DF3; MUC1/ZD; MUC-1/X; MUC-1/Y; MUC-1/Z; MUC-1/SEC; epithelial mucin tandem repeat sequence; go_component: membrane; go_comp…	MUC1 mucin isoform 1 precursor	890	TRUE	1:153429978-153431971	-3.54295	-3.63919	-3.4245	-0.214694	0.198529	0.0365518	5.43144	1.62815e-07	1.5669e-05	-3.08689	-3.262	-2.91177	-0.350232	2.10489e-08
cg11618577	KRTCAP3	2	27.519	200634	+	36.1	NCBI:RefSeq	CGGTGCCATGCAGCACGGCCCCCAGCAGCAGGTTCACGTGGCCCACCAAG	27518767	+	KCP3; MRV222; PRO9898; MGC126736; MGC126738;	NM_173853.2	GI:31341197	keratinocytes associated protein 3	keratinocyte associated protein 3	280	TRUE	2:27518414-27519324	0.540813	0.329774	0.800553	-0.470779	0.442107	0.089877	4.91902	1.82439e-06	0.00010238	1.90007	1.62764	2.17249	-0.544848	0.00409235	cg11618577rs1060525	rs1060525	2	cg11618577	KRTCAP3	27519047	27489086	-8.52677	5.48e-12	TRUE	7.59222	3.95e-11	TRUE
cg21243096	POU3F1	1	38.2841	5453	-	36.1	NCBI:RefSeq	CGTGTTCTCGCAGACCACCATCTGCCGCTTCGAGGCCCTGCAGCTGAGCT	38285037	-	OCT6; OTF6; SCIP;	NM_002699.2	GI:27545318	octamer-binding transcription factor 6; go_component: nucleus; go_function: transcription factor activity; go_function: transcription factor activity; go_process: nerve ensheathment; go_process: regulation of transcription; DNA-dependent	POU domain; class 3; transcription factor 1	893	TRUE	1:38282510-38286276	-4.26987	-4.6257	-3.83192	-0.793783	0.59513	0.160446	3.70922	0.000269971	0.00450207	-1.72378	-2.05987	-1.38769	-0.672177	0.0001656
cg11659747	SCARB2	4	77.3536	950	-	36.1	NCBI:RefSeq	CACGCTGCTGGTGGCCCGGGTCTTCCAGAAGGCTGTAGACCAGAGTATCG	77354059	-	CD36L2; HLGP85; LIMPII; SR-BII;	NM_005506.2	GI:33598925	CD36 antigen (collagen type I receptor; thrombospondin receptor)-like 2 (lysosomal integral membrane protein II); 85 kDa lysosomal sialoglycoprotein scavenger receptor class B; member 2; go_component: lysosomal membrane; go_component: membrane fraction; go_component: integral to plasma membrane; go_function: receptor activity; go_process: cell adhesion	scavenger receptor class B; member 2	450	TRUE	4:77353529-77354453	-3.41207	-3.46738	-3.34399	-0.123383	0.126448	0.0401848	3.14668	0.00190626	0.0178859	-2.72607	-2.81292	-2.63923	-0.173689	0.000125518
cg00615915	SERPINB8	18	59.7883	5271	+	36.1	NCBI:RefSeq	CGGCAGATGACTCAGAACCGTTCGATTGCTCTGGCTTGTGCAATCCCTGA	59788243	+	PI8; CAP2;	NM_198833.1	GI:38504668	isoform a is encoded by transcript variant 2; protease inhibitor 8 (ovalbumin type); cytoplasmic antiproteinase 2; serine (or cysteine) proteinase inhibitor; clade B (ovalbumin); member 8; go_component: cytosol; go_function: protein binding; go_function: serine-type endopeptidase inhibitor activity; go_function: serine-type endopeptidase inhibitor activity	serine (or cysteine) proteinase inhibitor; clade B (ovalbumin); member 8 isoform a	36	TRUE	18:59788171-59789017	-2.90868	-2.97699	-2.8246	-0.15239	0.158756	0.0383603	4.13855	5.16721e-05	0.0013187	-2.53355	-2.66075	-2.40636	-0.254399	6.66315e-08
cg27112247	TMED2	12	122.634	10959	+	36.1	NCBI:RefSeq	GTTTCACTATGTTGGTCAGGCTGGTCTTGAATTCTTGACCGCGTGATCCG	122635114	+	P24A; RNP24;	NM_006815.2	GI:21314646	go_component: microsome; go_component: Golgi stack; go_component: plasma membrane; go_component: integral to membrane; go_component: zymogen granule membrane; go_component: ER-Golgi intermediate compartment; go_process: vesicle targeting; go_process: intracellular protein transport; go_process: ER to Golgi vesicle-mediated transport	coated vesicle membrane protein	830	TRUE	12:122634040-122635782	-0.740659	-0.866193	-0.586156	-0.280037	0.295759	0.0552494	5.35315	2.38059e-07	2.04285e-05	-0.196397	-0.318427	-0.0743663	-0.244061	2.2117e-08
cg21824213	CASC5	15	38.6733	57082	+	36.1	NCBI:RefSeq	CGCGTGCAGAGCACAATGGATTAGCAGTCCATCGCCTTAACCACTCGGCC	38673739	+	D40; AF15Q14; KIAA1570;	NM_170589.2	GI:74048513	isoform 1 is encoded by transcript variant 1; AF15q14 protein; go_component: nucleus; go_component: acrosome; go_process: acrosome formation	cancer susceptibility candidate 5 isoform 1	400	TRUE	15:38673286-38674382	-4.90058	-5.29502	-4.4151	-0.879922	0.876469	0.142819	6.13692	4.50527e-09	7.66827e-07	-5.92948	-6.24317	-5.61579	-0.62738	0.0287287
cg24868271	PLCD1	3	38.0455	5333	-	36.1	NCBI:RefSeq	GAGGGGATCGTGCTGCTTCTTTCAGCCTGAGCATCGCTGACTATTCTGCG	38046121	-		NM_006225.1	GI:5453909	go_function: hydrolase activity; go_function: calcium ion binding; go_function: signal transducer activity; go_function: phosphoinositide phospholipase C activity; go_process: lipid catabolism; go_process: phospholipid metabolism; go_process: intracellular signaling cascade	phospholipase C; delta 1	657	TRUE	3:38045298-38046731	-0.208364	-0.25845	-0.14672	-0.11173	0.0984505	0.0303572	3.24307	0.00138778	0.0143624	1.00712	0.712176	1.30205	-0.589879	0.00148769
cg03205208	KIN	10	7.87085	22944	-	36.1	NCBI:RefSeq	GGTTTCAGCAAGTGGTTTCAAGGTAGTGCTAGGTGTCCTTCCCTTCCCCG	7869950	-	BTCD; KIN17;	NM_012311.2	GI:40068516	antigenic determinant of recA protein (mouse) homolog; go_component: nucleus; go_function: DNA binding; go_function: zinc ion binding	HsKin17 protein	904	TRUE	10:7869433-7871197	-3.52322	-3.6116	-3.41445	-0.197143	0.195378	0.0443245	4.40789	1.70981e-05	0.000572577	-3.97638	-4.08783	-3.86494	-0.222888	1.06068e-05
cg19531713	BRCA1	17	38.5306	672	-	36.1	NCBI:RefSeq	TTTTTAAAGACATAGTGTCCCCCTCAAGGCATATTCCAGTTCCTATCACG		-	IRIS; PSCP; BRCAI; BRCC1; RNF53;	NT_010755.15	breast cancer 1; early onset isoform BRCA1-delta15-17	isoform BRCA1-delta15-17 is encoded by transcript variant BRCA1-delta15-17; breast and ovarian cancer susceptibility protein 1; breast and ovarian cancer suseptibility protein variant; breast and ovarian cancer susceptibility protein; go_component: nucleus; go_component: nucleus; go_component: intracellular; go_component: BRCA1-BARD1 complex; go_component: ubiquitin ligase complex; go_component: …			TRUE	17:38530194-38531162	-3.68211	-3.74977	-3.59883	-0.150943	0.169059	0.0371185	4.55459	9.16193e-06	0.000360095	-3.56018	-3.68065	-3.4397	-0.240952	1.9716e-06
cg12864235	CDH9	5	27.0745	1007	-	36.1	NCBI:RefSeq	CAGCGGCAATATCTTCCTATTTGAGGGACGTCTCTTATTAATCAGAAACG	27074431	-		NM_016279.2	GI:16306540	T1-cadherin; cadherin-9; go_component: membrane; go_component: integral to membrane; go_function: protein binding; go_function: calcium ion binding; go_process: homophilic cell adhesion	cadherin 9; type 2 preproprotein	108	FALSE		0.84816	0.524546	1.24645	-0.721908	0.762993	0.112563	6.77836	1.36279e-10	4.67778e-08	0.16585	-0.0765344	0.408234	-0.484768	0.00974186
cg20159072	SLC25A20	3	48.9113	788	-	36.1	NCBI:RefSeq	CGGAGTGACAGACGGACTGACCATGGCCGACCAGCCAAAACCCATCAGCC	48911333	-	CAC; CACT;	NM_000387.3	GI:46276890	carnitine-acylcarnitine carrier; Carnitine-acylcarnitine translocase; go_component: mitochondrion; go_component: integral to membrane; go_component: mitochondrial inner membrane; go_function: binding; go_function: lipid transporter activity; go_process: transport	carnitine/acylcarnitine translocase	81	TRUE	3:48910626-48911550	-5.84192	-5.95501	-5.70273	-0.252278	0.250225	0.076936	3.25238	0.00134536	0.0140009	-5.5478	-5.59238	-5.50322	-0.0891609	0.0213562
cg12662162	C6orf106	6	34.7729	64771	-	36.1	NCBI:RefSeq	CGGGAGAAGTTGAGGGATTTTCGTTTATAACAACTCTACCATTTTGCAGG	34772603	-	MGC4614; FLJ22195; FLJ32402; dJ391O22.4; RP3-391O22.4;	NM_024294.2	GI:46094084	isoform a is encoded by transcript variant 1	chromosome 6 open reading frame 106 isoform a	262	TRUE	6:34771876-34772939	-3.75449	-3.84225	-3.64647	-0.195785	0.194408	0.0674986	2.88018	0.00441199	0.0315723	-3.78708	-3.88034	-3.69382	-0.186526	0.00100669
cg14166009	HKR1	19	42.5171	284459	+	36.1	NCBI:RefSeq	TGACAAGTTTCTCTGTAAACCAATGAGATCTGCTGACCGCGAAGGCATCG	42517420	+		NM_181786.2	GI:34330189	oncogene HKR1; go_component: nucleus; go_component: nucleus; go_function: DNA binding; go_function: zinc ion binding; go_function: zinc ion binding; go_function: metal ion binding; go_function: nucleic acid binding; go_process: transcription; go_process: development; go_process: regulation of transcription; DNA-dependent; go_process: regulation of transcription; DNA-dependent	GLI-Kruppel family member HKR1	271	TRUE	19:42516571-42517717	-1.22068	-1.29608	-1.12788	-0.168196	0.148873	0.0519406	2.86622	0.0046031	0.0324883	1.00042	0.395504	1.60533	-1.20983	0.000287576
cg09770154	MXI1	10	111.958	4601	+	36.1	NCBI:RefSeq	CGGCCTCGAGCAGAATCTGCACGTTCTGCAGAAAAGTGTTGATGTGCTTC	111957353	+	MXI; MAD2; MXD2; MGC43220;	NM_130439.3	GI:57242780	isoform b is encoded by transcript variant 2; MAX-interacting protein 1; MAX dimerization protein 2; MAX interacting protein 1; Max-related transcription factor; go_component: nucleus; go_component: nucleus; go_function: DNA binding; go_function: transcription regulator activity; go_function: transcription corepressor activity; go_process: regulation of transcription; go_process: regulation of tr…	MAX interactor 1 isoform b	440	TRUE	10:111957080-111961389	-6.52681	-6.68102	-6.33701	-0.344011	0.340615	0.0896627	3.79885	0.000193348	0.00352701	-7.30368	-7.48106	-7.1263	-0.354759	0.00275369
cg05889321	ALDH18A1	10	97.4068	5832	-	36.1	NCBI:RefSeq	CATAAGGTGTGTTTGTCAATGTTAACCATTTATATCCCGGGCACACCTCG	97406557	-	GSAS; P5CS; PYCS; MGC117316;	NM_002860.3	GI:62912455	isoform 1 is encoded by transcript variant 1; pyrroline-5-carboxlate synthetase; glutamate gamma-semialdehyde synthetase; delta1-pyrroline-5-carboxlate synthetase; pyrroline-5-carboxylate synthetase (glutamate gamma-semialdehyde synthetase); go_component: mitochondrion; go_component: inner membrane; go_function: kinase activity; go_function: transferase activity; go_function: oxidoreductase activ…	pyrroline-5-carboxylate synthetase isoform 1	270	TRUE	10:97405733-97406861	-2.81591	-2.86411	-2.75659	-0.107522	0.100307	0.0350128	2.86488	0.00462186	0.0325538	-2.42789	-2.55758	-2.29819	-0.259387	3.76929e-05
cg18771300	RHOJ	14	62.7415	57381	+	36.1	NCBI:RefSeq	CGTGCCCACTGTGTTTGACCACTATGCAGGTAAGAAAAAGTGGGAAACTC	62740898	+	TCL; ARHJ; TC10B; RASL7B; FLJ14445;	NM_020663.2	GI:29171294	RAS-like; family 7; member B; go_component: cellular component unknown; go_function: GTP binding; go_function: protein binding; go_function: nucleotide binding; go_function: GTPase activity; go_process: regulation of cell shape; go_process: small GTPase mediated signal transduction; go_process: actin cytoskeleton organization and biogenesis	TC10-like Rho GTPase	592	TRUE	14:62741321-62741574	-1.83013	-2.1383	-1.45084	-0.687459	0.710239	0.0874183	8.1246	4.75725e-14	4.6655e-11	-0.93748	-1.00704	-0.867916	-0.139127	0.052938	cg18771300rs4902214	rs4902214	14	cg18771300	RHOJ	62741490	62740656	-8.17458	3.2e-10	TRUE	11.6311	2.25e-18	TRUE
cg19475870	CDH9	5	27.0744	1007	-	36.1	NCBI:RefSeq	AAATAACACTTACCTTGCTTAACAATGGAACTGAGTTTAGCCCTACTCCG	27074431	-		NM_016279.2	GI:16306540	T1-cadherin; cadherin-9; go_component: membrane; go_component: integral to membrane; go_function: protein binding; go_function: calcium ion binding; go_process: homophilic cell adhesion	cadherin 9; type 2 preproprotein	69	FALSE		1.18198	1.02057	1.38064	-0.360063	0.410253	0.0741009	5.53641	9.72567e-08	1.01162e-05	0.939657	0.795209	1.0841	-0.288895	0.0259311
cg13240598	FLVCR	1	211.098	28982	+	36.1	NCBI:RefSeq	TTGCACTCTCTAACGGAGTAGATTCCAATAAACTTGCTTCCTTCACTGCG	211098220	+		NM_014053.1	GI:7661707	FLVCR protein; go_component: membrane; go_component: integral to plasma membrane; go_function: receptor activity; go_function: transporter activity; go_process: transport; go_process: development	feline leukemia virus subgroup C cellular receptor	331	TRUE	1:211097787-211098970	-5.73282	-5.84857	-5.59037	-0.25819	0.264791	0.07427	3.56524	0.000455707	0.00651756	-5.43495	-5.55751	-5.31238	-0.245132	0.00291266
cg00565075	EIF3S6IP	22	36.5748	51386	+	36.1	NCBI:RefSeq	CTTTTGTGTAGCATTCTTTCTGGTTCCTCTAACTTTGCCTCTCCTTTACG	36575316	+	EIF3S11; HSPC021; HSPC025; MSTP005;	NM_016091.2	GI:51093838	eIEF associated protein HSPC021; go_function: binding; go_function: protein binding; go_process: protein biosynthesis	eukaryotic translation initiation factor 3 subunit 6 interacting protein	477	TRUE	22:36574299-36576077	-2.78745	-2.90664	-2.64076	-0.265876	0.295823	0.083542	3.54101	0.000496905	0.00692875	-4.30356	-4.55096	-4.05617	-0.494791	0.000161847
cg06236748	INPPL1	11	71.6135	3636	+	36.1	NCBI:RefSeq	TGAACAAACTTTTCTTTCTCTTCAAGTTGAGGCCGGCGCTGCAGGCAGCG	71613473	+	SHIP2;	NM_001567.2	GI:4755141	go_function: inositol or phosphatidylinositol phosphatase activity; go_process: phosphate metabolism; go_process: intracellular signaling cascade	inositol polyphosphate phosphatase-like 1	21	TRUE	11:71613183-71614046	-4.32526	-4.41406	-4.21598	-0.19808	0.171655	0.0473165	3.62781	0.000363691	0.00556066	-4.17049	-4.24372	-4.09727	-0.146452	0.000539559
cg09266965	TRIM52	5	180.621	84851	-	36.1	NCBI:RefSeq	TAGAGCGTCTCTCCAGAGCGTGTGCAGGAGCGAGACGTCATTTTGCGTCG	180620725	-	RNF102; MGC16175;	NM_032765.2	GI:34147443	go_component: ubiquitin ligase complex; go_function: zinc ion binding; go_function: metal ion binding; go_function: ubiquitin-protein ligase activity; go_process: protein ubiquitination	hypothetical protein LOC84851	22	TRUE	5:180620556-180621666	-3.26977	-3.37822	-3.13629	-0.24193	0.248622	0.0446423	5.5692	8.26876e-08	8.86954e-06	-2.67315	-2.68728	-2.65903	-0.0282525	0.0475687
cg25739003	EEF1G	11	62.0978	1937	-	36.1	NCBI:RefSeq	GGCTGGGGTAAGTTTGCTGGCTCTGGTGGTTCGGGTCATCCTATCCACCG	62097927	-	EF1G;	NM_001404.3	GI:25453475	elongation factor 1-gamma; EF-1-gamma; eEF-1B gamma; translation elongation factor eEF-1 gamma chain; PRO1608; pancreatic tumor-related protein; go_component: intracellular; go_component: eukaryotic translation elongation factor 1 complex; go_function: translation elongation factor activity; go_process: protein biosynthesis; go_process: translational elongation	eukaryotic translation elongation factor 1 gamma	91	TRUE	11:62097017-62099117	-4.28976	-4.35824	-4.20549	-0.152751	0.146937	0.0453315	3.24138	0.00139563	0.0144219	-4.25486	-4.36682	-4.14289	-0.223932	0.0114832
cg12089439	TUSC3	8	15.4427	7991	+	36.1	NCBI:RefSeq	TTTAGTGGCACCATTGCTCTAAGCTGGGCTTCCAGCTGGGAATAAAGGCG	15442101	+	N33; OST3A; D8S1992; MGC13453;	NM_006765.2	GI:30410787	isoform a is encoded by transcript variant 1; Putative prostate cancer tumor suppressor; go_component: membrane; go_component: integral to membrane; go_function: electron transporter activity; go_process: electron transport	tumor suppressor candidate 3 isoform a	603	TRUE	8:15441907-15442774	-2.40134	-2.45847	-2.33102	-0.127445	0.135292	0.0489621	2.7632	0.00626341	0.0400108	-2.23839	-2.48649	-1.99029	-0.496204	0.0138227
cg03161839	ARHGEF1	19	47.0798	9138	+	36.1	NCBI:RefSeq	CGGATGGGAAGACTGAGGTCTACAGAGAAGTCATTACTTTTTGCAGATTA	47079107	+	GEF1; LBCL2; SUB1.5; P115-RHOGEF;	NM_004706.3	GI:39777602	isoform 2 is encoded by transcript variant 2; 115-kD protein; mouse Lsc homolog; go_component: cytoplasm; go_component: plasma membrane; go_function: protein binding; go_function: GTPase activator activity; go_function: guanyl-nucleotide exchange factor activity; go_function: Rho guanyl-nucleotide exchange factor activity; go_process: cell proliferation; go_process: Rho protein signal transductio…	Rho guanine nucleotide exchange factor 1 isoform 2	680	TRUE	19:47078587-47080706	-4.40133	-4.44779	-4.34415	-0.103644	0.106987	0.0387682	2.75967	0.00632897	0.0401309	-3.74027	-3.85277	-3.62777	-0.225002	6.56717e-07
cg05895453	KBTBD7	13	40.667	84078	-	36.1	NCBI:RefSeq	TTGAACCACACAAAACCCTATGAAATACTGGCAGGGGGCGGTGGCTCACG	40666702	-	DKFZP434E2318;	NM_032138.3	GI:34222148	go_component: cellular component unknown; go_function: protein binding; go_process: biological process unknown	kelch repeat and BTB (POZ) domain containing 7	266	FALSE		-0.982914	-1.0489	-0.901703	-0.147195	0.125374	0.0388948	3.22341	0.00148151	0.0150675	-0.843459	-1.10339	-0.583527	-0.519864	0.000125518
cg13964084	C6orf134	6	30.7027	79969	+	36.1	NCBI:RefSeq	CGGTGCTGGACCAGCACCTGAGGCCCCCAGCCCGCCGACCCGGAACCACA	30702632	+	FLJ13158; Nbla00487;	NM_024909.1	GI:13376368	isoform 2 is encoded by transcript variant 2; putative protein product of Nbla00487; Em:AB023049.7	hypothetical protein LOC79969 isoform 2	56	TRUE	6:30702403-30702881	-5.68163	-5.78347	-5.55628	-0.227192	0.28441	0.0764115	3.72209	0.00025744	0.00434587	-5.32752	-5.3839	-5.27114	-0.112757	0.00291266
cg20406374	SQSTM1	5	179.181	8878	+	36.1	NCBI:RefSeq	CGGGTCCCGGCCTTGGTCACCACTCCAGTCACCAGGCCGGCTCCCATGGC	179180503	+	p60; p62; PDB3; ZIP3;	NM_003900.3	GI:46251280	ubiquitin-binding protein p62; phosphotyrosine independent ligand for the Lck SH2 domain p62; Paget disease of bone 3; go_component: cytosol; go_component: cytosol; go_component: cytosol; go_function: zinc ion binding; go_function: metal ion binding; go_function: ubiquitin binding; go_function: SH2 domain binding; go_function: ubiquitin binding; go_function: SH2 domain binding; go_function: prote…	sequestosome 1	455	TRUE	5:179180219-179181490	-4.24812	-4.34128	-4.13347	-0.207804	0.189797	0.0651548	2.91301	0.00399086	0.0296721	-3.71777	-3.85344	-3.5821	-0.271337	3.85656e-08
cg26711820	MYF6	12	79.6258	4618	+	36.1	NCBI:RefSeq	CGCCCCCGGGCCTGCAGCCTCCACACTGCCCCGGCCAGTGTCTGATCTGG	79625577	+	MRF4; HERCULIN;	NM_002469.1	GI:4505298	Myogenic factor-6; go_component: nucleus; go_function: transcription factor activity; go_process: cell differentiation; go_process: striated muscle development; go_process: regulation of transcription from RNA polymerase II promoter	myogenic factor 6 (herculin)	243	TRUE	12:79625768-79627023	-3.47689	-3.56999	-3.36229	-0.207705	0.173889	0.0623949	2.78691	0.00583928	0.0382385	-2.58828	-2.90565	-2.2709	-0.634749	0.0124533
cg02456292	FLJ90805	19	47.5091	284339	+	36.1	NCBI:RefSeq	CGTGAGTTCAGTTTAGGACACAGGAAACCATAGGTATCTACGGGACTCCA	47509328	+		NM_173633.1	GI:27734988		hypothetical protein LOC284339	226	TRUE	19:47509064-47510021	-4.44125	-4.51713	-4.34787	-0.169251	0.180713	0.0348479	5.18577	5.29522e-07	3.69678e-05	-3.18786	-3.29865	-3.07708	-0.221561	0.014847
cg12335708	DPP4	2	162.639	1803	-	36.1	NCBI:RefSeq	CTTTCACTGGCAAGAGACGGAGTCCTGGGTTTCAGTTCCAGTTGCCTGCG	162639298	-	CD26; ADABP; ADCP2; DPPIV; TP103;	NM_001935.3	GI:47078262	dipeptidylpeptidase IV (CD26; adenosine deaminase complexing protein 2); T-cell activation antigen CD26; go_component: membrane; go_component: integral to membrane; go_function: aminopeptidase activity; go_function: prolyl oligopeptidase activity; go_function: dipeptidyl-peptidase IV activity; go_process: proteolysis; go_process: immune response	dipeptidylpeptidase IV	49	TRUE	2:162637886-162639319	-1.96789	-2.03052	-1.8908	-0.139721	0.145671	0.0432553	3.3677	0.000910731	0.0106936	-4.65885	-4.95857	-4.35912	-0.599451	1.63892e-06
cg16427670	ARHGEF7	13	110.565	8874	+	36.1	NCBI:RefSeq	GGCTGTGAAAGCAGCAGGCCGAACCTGGAGAGCCCAGACGGCAAGTGTCG	110565783	+	P50; P85; PAK3; PIXB; COOL1; P50BP; P85SPR; BETA-PIX; KIAA0142; KIAA0412; P85COOL1; Nbla10314; DKFZp761K1021;	NM_003899.2	GI:22027526	isoform a is encoded by transcript variant 1; SH3 domain-containing proline-rich protein; PAK-interacting exchange factor beta; rho guanine nucleotide exchange factor 7; putative protein product of Nbla10314; go_function: guanyl-nucleotide exchange factor activity; go_process: signal transduction	Rho guanine nucleotide exchange factor 7 isoform a	880	TRUE	13:110564691-110566860	-4.40787	-4.46641	-4.33581	-0.130601	0.131884	0.0456624	2.88825	0.00430497	0.0311309	-3.75481	-4.04733	-3.46229	-0.585032	0.0463003
cg17756392	CLPP	19	6.31245	8192	+	36.1	NCBI:RefSeq	TAGGCCGCTCACTTCCAGGAGTCTGGGCGGGCGCCATTAAGGGTGAGGCG	6312463	+		NM_006012.2	GI:53759125	ATP-dependent protease ClpAP (E. coli); proteolytic subunit; human; ClpP (caseinolytic protease; ATP-dependent; proteolytic subunit; E. coli) homolog; go_component: mitochondrion; go_function: peptidase activity; go_function: endopeptidase Clp activity; go_process: proteolysis	endopeptidase Clp precursor	8	TRUE	19:6311940-6313252	-4.90154	-4.98368	-4.80043	-0.183253	0.185967	0.0462388	4.02188	8.20802e-05	0.00186377	-4.90373	-4.99611	-4.81135	-0.184758	3.17685e-06
cg09381003	SHKBP1	19	45.7742	92799	+	36.1	NCBI:RefSeq	AAAGCCAAAGGGTTTATTATAGGTACATACAGTGTGCGCCCGCCACACCG	45774630	+	Sb1; PP203;	NM_138392.1	GI:19923916	go_component: membrane; go_component: voltage-gated potassium channel complex; go_function: protein binding; go_function: ion channel activity; go_function: voltage-gated potassium channel activity; go_process: potassium ion transport	SH3KBP1 binding protein 1	476	TRUE	19:45774110-45775263	-3.65446	-3.76696	-3.51599	-0.250973	0.247686	0.0472182	5.24557	3.98772e-07	3.06444e-05	-3.70331	-3.93325	-3.47336	-0.459891	1.56022e-09
cg04078251	KIF22	16	29.7099	3835	+	36.1	NCBI:RefSeq	CGGGGGTCATGGCCTCATCCCTGGAGATCACCTGAATAAGCAAGAGAAGA	29709559	+	KID; OBP; KNSL4; OBP-1; OBP-2;	NM_007317.1	GI:6453817	oriP binding protein; kinesin-like 4; origin of plasmid DNA replication-binding protein; go_component: microtubule; go_component: nucleus; go_component: intracellular; go_component: kinetochore; go_component: microtubule associated complex; go_function: ATP binding; go_function: nucleotide binding; go_function: microtubule motor activity; go_function: sequence-specific DNA binding; go_function: m…	kinesin family member 22	390	TRUE	16:29708418-29710238	-4.69067	-4.75657	-4.60957	-0.147	0.147539	0.0530159	2.78293	0.00590863	0.0385211	-4.84788	-4.95329	-4.74248	-0.210813	0.000122628
cg19664945	GPR75	2	53.9408	10936	-	36.1	NCBI:RefSeq	TTTGCTGTTTGGGGAACTCAAGCTCCCTGAAATAGCCAAAACCTGAAACG	53940572	-	GPR-chr2; WI-31133;	NM_006794.1	GI:5803024	go_component: integral to plasma membrane; go_function: receptor activity; go_function: rhodopsin-like receptor activity; go_process: signal transduction; go_process: G-protein coupled receptor protein signaling pathway	G protein-coupled receptor 75	275	TRUE	2:53940114-53941112	1.42514	1.3113	1.56526	-0.253957	0.244431	0.0571725	4.27532	2.96595e-05	0.000881439	2.09091	2.02014	2.16168	-0.141547	0.0114832
cg00053647	C7orf28B	7	6.8326	221960	-	36.1	NCBI:RefSeq	GTGTTTTGCTGGCTCGCGGAGTTTTCTCCTGGCTACAGGCGAGGGCTGCG	6832386	-	MGC19819; DKFZP586I1023; H_NH0577018.2;	NM_198097.1	GI:37674288	H_DJ1163J12.2; CGI-43 like protein	hypothetical protein LOC221960	211	TRUE	7:6831874-6832815	-4.01127	-4.08547	-3.91995	-0.165521	0.162063	0.0361858	4.47864	1.26792e-05	0.000460544	-4.34955	-4.48289	-4.21621	-0.266686	0.00169016
cg16184943	SUHW2	22	21.1933	140883	-	36.1	NCBI:RefSeq	CAGCAGCAATACCCCTGAGGCCTTGAAAGGATCTTGGGTTCCGGATCACG	21193505	-	ZNF279; ZNF632; 5 OY11.1; D87009.C22.3;	NM_080764.2	GI:38202248	zinc finger protein 279; go_component: nucleus; go_function: DNA binding; go_function: zinc ion binding; go_function: metal ion binding; go_process: transcription; go_process: regulation of transcription; DNA-dependent	suppressor of hairy wing homolog 2	212	TRUE	22:21192576-21193367	-1.14824	-1.23016	-1.04743	-0.182734	0.168264	0.0360886	4.66251	5.73475e-06	0.000253994	-4.87379	-5.03508	-4.7125	-0.322583	0.0384626
cg27109971	THOC1	18	0.257637	9984	-	36.1	NCBI:RefSeq	CGAGACACCTGCCCCACTAAACGAGCTGAGAGGATGGACCCAACCAGCAG	258022	-	P84; HPR1; P84N5;	NM_005131.1	GI:4826881	go_component: nucleus; go_function: DNA binding; go_function: RNA binding; go_function: protein binding; go_function: structural molecule activity; go_process: transport; go_process: signal transduction; go_process: mRNA export from nucleus; go_process: nuclear mRNA splicing; via spliceosome	nuclear matrix protein p84	385	TRUE	18:257630-259494	-2.72098	-2.75638	-2.67742	-0.0789601	0.0870535	0.0327706	2.65645	0.00854065	0.0490094	-2.38205	-2.47609	-2.28801	-0.188087	1.69704e-05
cg21120786	SCAP2	7	26.8707	8935	-	36.1	NCBI:RefSeq	TCCAGCTGCAGCTCGCTGGAGATTCAGTGACTTCCTTGTTGTGAGCCCCG	26870866	-	PRAP; RA70; SAPS; SKAP55R; MGC10411; MGC33304; SKAP-HOM;	NM_003930.3	GI:38202227	src kinase-associated phosphoprotein of 55-related protein; src-associated adaptor protein; Fyn-associated phosphoprotein SKAP55 homologue; Pyk2/RAFTK-associated protein; go_component: plasma membrane; go_function: kinase activity; go_function: SH3/SH2 adaptor activity; go_process: signal transduction; go_process: protein complex assembly	src family associated phosphoprotein 2	153	TRUE	7:26870108-26871408	-3.6087	-3.66727	-3.53661	-0.130659	0.126957	0.0329085	3.85787	0.00015468	0.00299401	-3.13002	-3.22881	-3.03123	-0.197586	5.9703e-06
cg04987894	GSTM5	1	110.056	2949	+	36.1	NCBI:RefSeq	GCTTTGCTCCGTTAGGATCTGGCTGGTGTCTCAAGCGCACAGCCAAGTCG	110056388	+	GTM5; GSTM5-5;	NM_000851.2	GI:23065562	glutathione S-transferase; Mu-5; glutathione S-alkyltransferase M5; glutathione S-aryltransferase M5; S-(hydroxyalkyl)glutathione lyase M5; glutathione S-aralkyltransferase M5; GST class-mu 5; go_function: transferase activity; go_function: glutathione transferase activity; go_function: glutathione transferase activity; go_process: metabolism	glutathione S-transferase M5	249	TRUE	1:110056117-110056501	-2.30658	-2.52409	-2.03887	-0.485214	0.510909	0.175189	2.91634	0.00395036	0.0294348	-1.70335	-2.1653	-1.24141	-0.923883	8.69434e-06
cg15286372	LRRC1	6	53.7673	55227	+	36.1	NCBI:RefSeq	CCAGGCGCTACTGGATTCGGTGTAGTTTTGAGGTGTTTGCACCACCCTCG	53767254	+	LANO; FLJ10775; FLJ11834; dJ523E19.1;	NM_025168.1	GI:13378148	LAP (leucine-rich repeats and PDZ) and no PDZ protein; leucine-rich repeat-containing 1; go_component: membrane	leucine rich repeat containing 1	53	TRUE	6:53767140-53769210	-5.33706	-5.42048	-5.23438	-0.186103	0.205284	0.0586773	3.49852	0.000577721	0.0077715	-5.50638	-5.5667	-5.44607	-0.12063	0.036369
cg23472215	GSTM3	1	110.084	2947	-	36.1	NCBI:RefSeq	GGGGTGAGTGCCGTCTCAACGGTAGAGCCGCTCGGTCAAAGAGACTGACG	110084563	-	GST5; GSTB; GTM3; GSTM3-3; MGC3310; MGC3704;	NM_000849.3	GI:39995110	glutathione S-transferase; Mu-3; brain GST; glutathione S-alkyltransferase M3; glutathione S-aryltransferase M3; S-(hydroxyalkyl)glutathione lyase M3; glutathione S-aralkyltransferase M3; GST class-mu 3; go_function: transferase activity; go_function: glutathione transferase activity; go_function: glutathione transferase activity; go_process: metabolism; go_process: establishment of blood-nerve b…	glutathione S-transferase M3	225	TRUE	1:110083766-110084903	-6.53648	-6.68823	-6.34972	-0.338505	0.336574	0.127952	2.63048	0.00919703	0.0514429	-5.47595	-6.22011	-4.73179	-1.48832	5.65532e-06
cg21922841	SLC9A3R1	17	70.2557	9368	+	36.1	NCBI:RefSeq	CCCTCTCAACTGGAGCTGCACCCAGGCTTTGGCTAAAGGCTGTTAAAACG	70256373	+	EBP50; NHERF;	NM_004252.1	GI:4759139	solute carrier family 9 (sodium/hydrogen exchanger); isoform 3 regulatory factor 1; go_component: actin cytoskeleton; go_function: protein binding; go_function: protein binding; go_function: beta-2 adrenergic receptor binding; go_function: sodium:hydrogen antiporter regulator activity; go_process: protein complex assembly; go_process: Wnt receptor signaling pathway	solute carrier family 9 (sodium/hydrogen exchanger); isoform 3 regulator 1	647	TRUE	17:70255432-70257599	-3.14584	-3.26374	-3.00073	-0.263004	0.297931	0.0569726	5.22937	4.30701e-07	3.19075e-05	-3.40215	-3.68203	-3.12226	-0.559769	4.73782e-06	cg21922841rs734232	rs734232	17	cg21922841	SLC9A3R1	70255726	70277326	0.790902	0.43391	FALSE	-6.57173	4.11e-09	TRUE
cg04001333	C14orf58	14	75.1151	55640	+	36.1	NCBI:RefSeq	AGACGCTGGGGTCCGCTTGGAGTGCGGACTCCGGCACAGGGGTGTCATCG	75114745	+	FLJ20371;	NM_017791.1	GI:8923349	go_component: membrane; go_component: integral to membrane; go_function: transporter activity; go_process: transport	hypothetical protein LOC55640	356	TRUE	14:75113853-75115279	0.0442165	-0.210999	0.358328	-0.569328	0.562887	0.101022	5.57189	8.15879e-08	8.79739e-06	2.19799	1.48182	2.91416	-1.43234	1.81005e-05	cg04001333rs2287015	rs2287015	14	cg04001333	C14orf58	75115101	75115115	-8.52006	3.73e-10	TRUE	8.57614	5.02e-13	TRUE
cg14086647	LIMK2	22	29.938	3985	+	36.1	NCBI:RefSeq	GTAAGGTTGATTCTGCGGGGGCCGGAAGTCTCAACACGGATGACAGTCCG	29938250	+		NM_005569.3	GI:73390104	isoform 2a is encoded by transcript variant 2a; go_component: nucleus; go_component: cytoplasm; go_component: cytoplasm; go_function: ATP binding; go_function: protein binding; go_function: zinc ion binding; go_function: metal ion binding; go_function: nucleotide binding; go_function: transferase activity; go_function: protein-tyrosine kinase activity; go_function: protein serine/threonine kinase…	LIM domain kinase 2 isoform 2a	228	TRUE	22:29937851-29938693	-5.9207	-6.05126	-5.76002	-0.291235	0.25745	0.0968476	2.6583	0.00849562	0.0489693	-5.68741	-5.77768	-5.59713	-0.180555	0.0263157
cg01585758	SUMO1	2	202.811	7341	-	36.1	NCBI:RefSeq	TCCAGAGGACTAATCGCAGAAGCAGGGCCCTAGGCCTTAGTTATGTAACG	202811567	-	GMP1; PIC1; SMT3; UBL1; SENP2; SMT3C; SMT3H3; SUMO-1;	NM_003352.4	GI:54792063	isoform a precursor is encoded by transcript variant 1; ubiquitin-like 1 (sentrin); GAP modifying protein 1; go_component: nucleus; go_function: protein binding; go_process: ubiquitin cycle; go_process: protein modification; go_process: protein sumoylation; go_process: negative regulation of transcription	small ubiquitin-like modifier 1 isoform a precursor	569	TRUE	2:202810699-202811877	-3.62478	-3.69398	-3.53961	-0.15437	0.177554	0.0394399	4.50189	1.14834e-05	0.000426128	-3.61384	-3.74301	-3.48468	-0.258326	0.000106562
cg25488082	LOC116143	2	68.2384	116143	-	36.1	NCBI:RefSeq	GGTTAGGCTGTCCTAAGATATGCCTGATGGTCTTGGGCTCACTCCAGCCG	68238160	-		NM_138458.1	GI:24308443	go_function: calcium ion binding	hypothetical protein LOC116143	206	TRUE	2:68237580-68238931	-4.65973	-4.72674	-4.57724	-0.149499	0.15558	0.0591863	2.62865	0.00924486	0.0516263	-4.89856	-4.96161	-4.83551	-0.126102	0.0240799
cg13673514	KIAA1446	14	100.106	57596	-	36.1	NCBI:RefSeq	GGCTCCAGTGCCGTAGGATCCAGGCATGCACTGTCCGTGTTTATTGAGCG	100105884	-	BEGAIN;	NM_020836.2	GI:34147339	brain-enriched guanylate kinase-associated protein; go_component: membrane; go_function: protein binding	likely ortholog of rat brain-enriched guanylate kinase-associated protein	313	TRUE	14:100103238-100105652	-2.20221	-2.35293	-2.01672	-0.336208	0.313258	0.074857	4.18476	4.29002e-05	0.00114893	-1.13459	-1.27301	-0.996175	-0.276833	0.0482138
cg20507276	OR2L13	1	246.167	284521	+	36.1	NCBI:RefSeq	GAGACACCAGTGTGTAGAGCAGAGCCCTTCCTTTCGAGAGGGTCTTCACG	246167116	+	OR2L14; MGC40047;	NM_175911.2	GI:31342210	olfactory receptor; family 2; subfamily L; member 14; go_component: integral to membrane; go_function: receptor activity; go_function: olfactory receptor activity; go_process: sensory perception; go_process: signal transduction; go_process: sensory perception of smell; go_process: G-protein coupled receptor protein signaling pathway	olfactory receptor; family 2; subfamily L; member 13	107	TRUE	1:246166629-246167405	-2.60315	-3.00156	-2.11279	-0.888765	0.963996	0.300117	3.21206	0.00153821	0.0154008	-3.40316	-4.45907	-2.34725	-2.11181	9.90263e-08	cg20507276rs4478844	rs4478844	1	cg20507276	OR2L13	246167223	246195863	-8.70559	3.33e-13	TRUE	5.09762	2.09e-06	FALSE
cg04155793	CDK10	16	88.2803	8558	+	36.1	NCBI:RefSeq	TAGTGGGAGGCCACGGCGATTACCCAGGTGAAGGTCTTCCAGGTGAGACG	88280579	+	PISSLRE;	NM_003674.2	GI:32528262	isoform 1 is encoded by transcript variant 1; serine/threonine protein kinase PISSLRE; CDC2-related protein kinase; cell division protein kinase 10; cyclin-dependent kinase related protein; go_function: ATP binding; go_function: kinase activity; go_function: nucleotide binding; go_function: transferase activity; go_function: protein-tyrosine kinase activity; go_function: protein serine/threonine …	cyclin-dependent kinase 10 isoform 1	231	TRUE	16:88280292-88281618	0.727355	0.49399	1.01457	-0.520583	0.480208	0.0755876	6.35301	1.41985e-09	3.48117e-07	-0.445898	-0.696115	-0.19568	-0.500435	0.0353591	cg04155793rs11647958	rs11647958	16	cg04155793	CDK10	88280348	88248410	-5.57371	3.02e-07	FALSE	6.29889	1.32e-08	TRUE
cg25903497	TMBIM1	2	218.865	64114	-	36.1	NCBI:RefSeq	CGCCCCGGCGCATGGCCGCCCCAGCCCTGGACCAGTCCCCACCGCCCACA	218865524	-	RECS1; PP1201;	NM_022152.4	GI:50593007	go_component: membrane; go_component: integral to membrane	PP1201 protein	177	TRUE	2:218865058-218865787	-2.68636	-2.30014	-3.16171	0.861575	-0.815052	0.124972	-6.52188	5.66108e-10	1.57554e-07	-5.15129	-4.03723	-6.26536	2.22813	4.82602e-12
cg24014020	PIGQ	16	0.560797	9091	+	36.1	NCBI:RefSeq	GCCACCGCGCCAGGTTGGTGTTTATTTTTCAAACAAGGCGCTGGGAAACG	560005	+	GPI1; hGPI1; MGC12693; c407A10.1;	NM_004204.2	GI:22538449	isoform 2 is encoded by transcript variant 2; N-acetylglucosaminyl transferase component Gpi1; N-acetylglucosamyl transferase component GPI1; c407A10.1 (GPI1 (N-acetylglucosaminyl transferase component)); go_component: integral to membrane; go_function: transferase activity; transferring glycosyl groups; go_function: phosphatidylinositol N-acetylglucosaminyltransferase activity; go_process: GPI a…	phosphatidylinositol glycan; class Q isoform 2	792	TRUE	16:559654-560907	-3.73051	-3.50652	-4.00618	0.499664	-0.465372	0.102448	-4.5425	9.65058e-06	0.000375716	-5.33422	-4.58702	-6.08142	1.49441	4.01688e-07
cg05158538	PPARGC1A	4	23.5006	10891	-	36.1	NCBI:RefSeq	CGCTTCCCTCAGATGCTATTATTCCTGTAAGGGGGGATGGGCTTGGGCAA	23500798	-	LEM6; PGC1; PGC1A; PGC-1v; PPARGC1; PGC-1(alpha);	NM_013261.2	GI:29570796	ligand effect modulator-6; PPAR gamma coactivator-1; PPAR gamma coactivator variant form; go_component: nucleus; go_component: DNA-directed RNA polymerase II; core complex; go_function: DNA binding; go_function: RNA binding; go_function: nucleotide binding; go_function: androgen receptor binding; go_function: transcription factor binding; go_function: RNA polymerase II transcription mediator acti…	peroxisome proliferative activated receptor gamma coactivator 1	214	FALSE		-2.28039	-2.22088	-2.35364	0.132758	-0.165329	0.0422657	-3.91167	0.000125928	0.00255014	-4.93031	-4.4787	-5.38193	0.903232	0.00153232
cg15543551	FGF12	3	193.928	2257	-	36.1	NCBI:RefSeq	CACCAAAGGACACTTAGGAGCAGCAGCAGATTGCCTCTACAGGGGATACG	193928066	-	FHF1; FGF12B;	NM_021032.2	GI:21614509	isoform 1 is encoded by transcript variant 1; fibroblast growth factor 12B; fibroblast growth factor homologous factor 1; myocyte-activating factor; fibroblast growth factor FGF-12b; go_component: nucleus; go_function: growth factor activity	fibroblast growth factor 12 isoform 1	170	TRUE	3:193927501-193928340	-2.85972	-2.62377	-3.15011	0.526343	-0.517082	0.0874422	-5.91342	1.44799e-08	1.89945e-06	-0.75969	-0.424855	-1.09452	0.669669	0.0197937	cg15543551rs1016532	rs1016532	3	cg15543551	FGF12	193927896	193926231	6.65986	2.67e-09	TRUE	-12.5097	5.68e-21	TRUE
cg25500444	FLJ23514	11	85.7637	60494	+	36.1	NCBI:RefSeq	CGGAGCTTTGGATGTGCCTTAAAAATAAGAGTGACGAAAATCTTGAACTT	85763426	+		NM_021827.2	GI:47271448	go_function: DNA binding	hypothetical protein LOC60494	323	TRUE	11:85763239-85763775	-2.40571	-2.257	-2.58874	0.331742	-0.314026	0.0513468	-6.11577	5.03744e-09	8.36661e-07	-2.96223	-2.68476	-3.23971	0.554943	0.00516483	cg25500444rs292092	rs292092	11	cg25500444	FLJ23514	85763749	85764229	0.994393	0.323835	FALSE	6.12073	4.07e-08	TRUE
cg01280080	ATIC	2	215.886	471	+	36.1	NCBI:RefSeq	CGGTCAGGTTTCTTGCAAATTCCACAAGGCCGGTTTTGTCAGAGACACTA	215885081	+	PURH; AICAR; AICARFT; IMPCHASE;	NM_004044.4	GI:39725714	AICARFT/IMPCHASE; go_function: hydrolase activity; go_function: transferase activity; go_function: IMP cyclohydrolase activity; go_function: phosphoribosylaminoimidazolecarboxamide formyltransferase activity; go_process: purine nucleotide biosynthesis; go_process: nucleobase; nucleoside; nucleotide and nucleic acid metabolism	5-aminoimidazole-4-carboxamide ribonucleotide formyltransferase/IMP cyclohydrolase	440	TRUE	2:215884284-215885543	-2.79869	-2.70956	-2.90838	0.19882	-0.184571	0.0556268	-3.31802	0.00107879	0.0120095	-5.39241	-5.15938	-5.62543	0.466048	0.00267722
cg14917512	GNA11	19	3.04569	2767	+	36.1	NCBI:RefSeq	CGCTCAGGCAACACGCCATCATGGACTCCAGAGTCATCGTCCCGGCCCCG	3045530	+	GNA-11;	NM_002067.1	GI:4504036	guanine nucleotide-binding protein; Gq class; GNA11; go_component: cytoplasm; go_component: plasma membrane; go_function: GTP binding; go_function: nucleotide binding; go_function: GTPase activity; go_function: signal transducer activity; go_process: signal transduction; go_process: protein amino acid ADP-ribosylation; go_process: G-protein coupled receptor protein signaling pathway	guanine nucleotide binding protein (G protein); alpha 11 (Gq class)	155	TRUE	19:3044235-3046095	-2.17244	-2.01773	-2.36285	0.345121	-0.436422	0.15357	-2.84184	0.00495495	0.0341181	-1.52717	-1.20825	-1.8461	0.637848	0.022513
cg12717203	FLJ90036	4	0.114342	255403	+	36.1	NCBI:RefSeq	TACAGCTCTATCCAATTAGAGCGCTGGATTGACAACTGCCGAATGAGGCG	114402	+		NM_153691.4	GI:52694682		hypothetical protein LOC255403	60	TRUE	4:114215-115524	-1.86462	-1.49287	-2.32216	0.829295	-0.876079	0.279002	-3.14005	0.00194779	0.0181679	-3.51091	-2.47306	-4.54876	2.0757	4.01884e-06	cg12717203rs6842197	rs6842197	4	cg12717203	FLJ90036	114342	149061	7.17786	1.61e-09	TRUE	-9.1364	2.86e-14	TRUE
cg24476569	ABCC4	13	94.7524	10257	-	36.1	NCBI:RefSeq	AAGCTCAGAGGTCCACCGTAGCATGCAACATGTGAGATGCCTAAAGCCCG	94751684	-	MRP4; MOATB; MOAT-B; EST170205;	NM_005845.2	GI:34452699	canalicular multispecific organic anion transporter (ABC superfamily); bA464I2.1 (ATP-binding cassette; sub-family C (CFTR/MRP); member 4); go_component: membrane; go_component: integral to membrane; go_function: ATP binding; go_function: ATPase activity; go_function: nucleotide binding; go_function: chloride channel activity; go_function: 15-hydroxyprostaglandin dehydrogenase (NAD+) activity; go…	ATP-binding cassette; sub-family C; member 4	699	TRUE	13:94750834-94752550	-1.95423	-1.74415	-2.21279	0.468637	-0.496008	0.0775408	-6.39674	1.12061e-09	2.88488e-07	-2.37916	-2.10897	-2.64935	0.540385	0.0156893	cg24476569rs2992907	rs2992907	13	cg24476569	ABCC4	94752383	94757902	2.37177	0.0236908	FALSE	-12.7755	2.69e-21	TRUE
cg07962315	C9orf95	9	76.8943	54981	-	36.1	NCBI:RefSeq	CGCTCATTCATTTGGGTAGGTAATTAGAAAGGACTGACGTATTTCAATAC	76892918	-	NRK1; FLJ20559; bA235O14.2; RP11-235O14.2;	NM_017881.1	GI:8923529	go_function: ATP binding; go_function: kinase activity; go_function: nucleotide binding; go_function: transferase activity; go_function: uridine kinase activity; go_process: pyridine nucleotide biosynthesis	nicotinamide riboside kinase 1	1375	FALSE		-0.161661	-0.0371452	-0.314911	0.277766	-0.255574	0.0564033	-4.53118	1.01311e-05	0.000391464	-3.55791	-2.90973	-4.2061	1.29638	8.5122e-05
cg21201659	SEC23IP	10	121.642	11196	+	36.1	NCBI:RefSeq	CGGCCCACCGTCCGATACACGTCTCCGGGTACCCGGTACCACACCACTGA	121642213	+	P125; MSTP053;	NM_007190.2	GI:30410711	phospholipase; go_component: Golgi stack; go_component: endoplasmic reticulum; go_component: ER-Golgi intermediate compartment; go_function: metal ion binding; go_function: protein binding; go_process: intracellular protein transport; go_process: Golgi organization and biogenesis	Sec23-interacting protein p125	65	TRUE	10:121641271-121642663	-4.00023	-3.82853	-4.21154	0.383012	-0.357627	0.0598306	-5.97733	1.03996e-08	1.48735e-06	-5.05523	-4.88793	-5.22254	0.334608	0.00881386
cg18182399	DES	2	219.991	1674	+	36.1	NCBI:RefSeq	AGGAGGACACGCGCTGGCTGGACGAGTAGGCCTGGCTCATGGTGACGGCG	219991343	+	CSM1; CSM2; CMD1I; FLJ12025; FLJ39719; FLJ41013; FLJ41793;	NM_001927.3	GI:55749931	intermediate filament protein; go_component: intermediate filament; go_function: structural constituent of cytoskeleton; go_process: muscle development; go_process: muscle contraction; go_process: regulation of heart contraction rate; go_process: cytoskeleton organization and biogenesis	desmin	76	TRUE	2:219991189-219992151	-5.28565	-5.20723	-5.38216	0.174926	-0.23867	0.0918491	-2.59851	0.0100673	0.0547204	-1.92817	-1.58813	-2.26821	0.680078	0.0324719
cg17119387	KIAA0664	17	2.56218	23277	-	36.1	NCBI:RefSeq	CTCTTGCAGATTTGCTAAATGACCGCGCAGTCTGTCATCTGCGGTGTTCG	2562064	-	DKFZp686L05242;	NM_015229.2	GI:40254858	go_function: binding; go_function: translation initiation factor activity; go_process: protein biosynthesis	hypothetical protein LOC23277	117	TRUE	17:2561030-2563522	-2.85196	-2.70956	-3.02722	0.317656	-0.338244	0.0892251	-3.79091	0.000199201	0.00360506	-4.19591	-3.41667	-4.97515	1.55848	6.56232e-06
cg13509147	CREB3L3	19	4.1046	84699	+	36.1	NCBI:RefSeq	CGGTCACAGGCAGCTCCCAGCCCACCTCCAGGTGCTGATTGGTGGACAGG	4104629	+	CREB-H; HYST1481; MGC126553; MGC126557;	NM_032607.1	GI:14211948	CREB/ATF family transcription factor; go_component: nucleus; go_function: DNA binding; go_process: regulation of transcription; DNA-dependent	cAMP responsive element binding protein 3-like 3	26	FALSE		-3.42525	-2.94761	-4.01311	1.06549	-0.877543	0.176664	-4.9673	1.46342e-06	8.53801e-05	-3.30042	-3.00681	-3.59403	0.587228	0.00313764
cg05600174	C9orf95	9	76.8944	54981	-	36.1	NCBI:RefSeq	CGTGCATTCATTTGGGTAGGTAATTAAGGGAAATACAGGAAATGGAAGAT	76892918	-	NRK1; FLJ20559; bA235O14.2; RP11-235O14.2;	NM_017881.1	GI:8923529	go_function: ATP binding; go_function: kinase activity; go_function: nucleotide binding; go_function: transferase activity; go_function: uridine kinase activity; go_process: pyridine nucleotide biosynthesis	nicotinamide riboside kinase 1	1439	FALSE		-2.15686	-2.03919	-2.30169	0.262496	-0.25736	0.0653791	-3.93642	0.000114474	0.00239107	-5.20579	-4.79072	-5.62085	0.830128	4.76576e-05
cg16072462	PF4	4	75.0666	5196	-	36.1	NCBI:RefSeq	CGATGGGAAACTCGGGCTGGGTCTCTGTGGCCAATGACTCCTGAGCCTCG	75066541	-	CXCL4; SCYB4;	NM_002619.1	GI:4505732	go_component: extracellular space; go_function: heparin binding; go_function: chemokine activity; go_process: immune response; go_process: sensory perception; go_process: platelet activation; go_process: immune cell chemotaxis; go_process: negative regulation of angiogenesis; go_process: cytokine and chemokine mediated signaling pathway; go_process: negative regulation of megakaryocyte differenti…	platelet factor 4 (chemokine (C-X-C motif) ligand 4)	81	TRUE	4:75066388-75066770	0.227082	0.346011	0.0807089	0.265302	-0.27759	0.0819285	-3.38819	0.000848795	0.0101456	-1.79202	-1.3362	-2.24784	0.911633	1.88951e-06
cg11563860	CNTN4	3	2.11694	152330	+	36.1	NCBI:RefSeq	AGCTTCCCATGCAGTTAAATGCCACTGTTATTCTGACAAACATGTGCCCG	2117247	+	AXCAM; BIG-2; CNTN4A; MGC33615;	NM_175607.1	GI:28373121	isoform a precursor is encoded by transcript variant 1; axonal cell adhesion molecule; neural cell adhesion protein BIG-2 precursor; axonal-associated cell adhesion molecule; go_component: membrane; go_function: protein binding; go_process: cell adhesion	contactin 4 isoform a precursor	310	TRUE	3:2114492-2116955	-1.06619	-0.982798	-1.16883	0.186035	-0.207205	0.0453129	-4.57276	8.47181e-06	0.000341442	-2.16259	-1.8035	-2.52167	0.718161	0.000134579
cg01919208	LAMB2	3	49.1455	3913	-	36.1	NCBI:RefSeq	GTCCCTCCGACAGCTTAGAGTCCAGCGACTTTGAGCAAAGTTGGGAATCG	49145603	-	LAMS;	NM_002292.2	GI:9845495	laminin S; go_component: basal lamina; go_function: protein binding; go_function: structural molecule activity; go_process: cell adhesion; go_process: synaptic transmission	laminin; beta 2 precursor	103	TRUE	3:49145398-49145615	-1.17951	-1.12055	-1.25208	0.131529	-0.16453	0.0594923	-2.76556	0.00621998	0.0398322	-0.130319	0.305169	-0.565808	0.870977	2.4598e-05
cg04471507	STMN1	1	26.106	3925	-	36.1	NCBI:RefSeq	CGCCACCCACATGGGTGCCTAAGACGCCCGAGCCCCTGTGACAGCACAAT	26105955	-	Lag; SMN; OP18; PP17; PP19; PR22; LAP18;	NM_005563.3	GI:44889961	metablastin; prosolin; oncoprotein 18; phosphoprotein 19; Pr22 protein; leukemia-associated phosphoprotein p18; stathmin 1 variant; go_component: cytosol; go_component: microtubule; go_function: tubulin binding; go_function: signal transducer activity; go_function: signal transducer activity; go_process: microtubule depolymerization; go_process: intracellular signaling cascade; go_process: mitoti…	stathmin 1	8	TRUE	1:26104408-26106291	-0.986078	-0.910934	-1.07856	0.167628	-0.18137	0.0667086	-2.71884	0.00713298	0.0436954	-1.67748	-0.884375	-2.47059	1.58622	0.000217506
cg21732383	THBS2	6	169.397	7058	-	36.1	NCBI:RefSeq	CGTGGCCCCATCACAGGAACAACCTGACGTGCAGGCACAGAGCAAGGACT	169396062	-	TSP2;	NM_003247.2	GI:40317627	go_component: extracellular region; go_component: extracellular matrix (sensu Metazoa); go_function: protein binding; go_function: calcium ion binding; go_function: heparin binding; go_function: structural molecule activity; go_process: cell adhesion	thrombospondin 2 precursor	555	FALSE		-3.26752	-3.19468	-3.35718	0.162498	-0.162495	0.0558497	-2.9095	0.00403408	0.0298427	-4.36023	-4.12666	-4.5938	0.467135	0.00101697
cg01447817	AQP12A	2	241.279	375318	+	36.1	NCBI:RefSeq	CGCCTTCTCCACGCAGCTGTGGGTAGCTGGCCCCTCTGCAGGAAATTCAA	241279935	+	AQP12;	NM_198998.1	GI:40538879	aquaporin X2; go_component: membrane; go_component: integral to membrane; go_function: transporter activity; go_process: transport	aquaporin 12A	1011	TRUE	2:241278857-241279068	-0.693855	-0.465116	-0.975379	0.510262	-0.518455	0.069995	-7.40703	3.64233e-12	2.20629e-09	-1.4525	-1.10068	-1.80432	0.703641	0.000126987
cg05250458	ZNF177	19	9.33456	7730	+	36.1	NCBI:RefSeq	TGCCTCTTATTTTACTCTAATGCAATGAATAAAGACAGTCCCAGCCTTCG	9334696	+		NM_003451.1	GI:4508008	go_component: nucleus; go_function: DNA binding; go_function: zinc ion binding; go_function: metal ion binding; go_process: transcription; go_process: regulation of transcription; DNA-dependent; go_process: negative regulation of transcription from RNA polymerase II promoter	zinc finger protein 177	131	TRUE	19:9334490-9335153	-1.72384	-1.64136	-1.82535	0.183993	-0.227355	0.0459256	-4.95052	1.58024e-06	9.11623e-05	-2.78256	-2.64193	-2.92318	0.281249	0.0444512
cg24169822	HOXA4	7	27.1375	3201	-	36.1	NCBI:RefSeq	TTTGCAGCTTCTGCCAAGCTTCTCAAAGCAAGGGCTCTCAGGCTGACACG	27136924	-	HOX1; HOX1D;	NM_002141.2	GI:24497492	homeobox protein HOX-A4; Hox-1.4-like protein; Dfd-like protein; go_component: nucleus; go_function: transcription factor activity; go_process: morphogenesis; go_process: regulation of transcription; DNA-dependent	homeobox protein A4	595	TRUE	7:27136060-27137536	-0.527165	-0.295427	-0.812381	0.516955	-0.504326	0.0989957	-5.09442	8.13021e-07	5.31561e-05	0.610133	0.980253	0.240013	0.74024	0.00115975	cg24169822rs10246712	rs10246712	7	cg24169822	HOXA4	27137519	27165385	-1.49738	0.140226	FALSE	-6.45982	6.25e-09	TRUE
cg11126134	FLJ14834	13	30.3783	84935	+	36.1	NCBI:RefSeq	CGTCTCATAACTTGGCATGCTCGAGTCTGCTCGCAGGCAAGGCTTAGTCA	30378328	+		NM_032849.2	GI:21361885		hypothetical protein LOC84935	24	TRUE	13:30378164-30379189	-3.81923	-3.56845	-4.12787	0.559416	-0.580497	0.0968276	-5.99516	9.47816e-09	1.3943e-06	-3.84744	-3.31466	-4.38022	1.06556	0.000158174
cg10296238	C21orf56	21	46.4296	84221	-	36.1	NCBI:RefSeq	AACATTCTGACAGTTTTCTGGTCTTGACACATTATCCTTTTAATATAGCG	46428729	-	MGC99490; DKFZp434N0650;	NM_032261.3	GI:23346426	go_component: cellular component unknown; go_function: protein binding; go_process: biological process unknown	hypothetical protein LOC84221	873	TRUE	21:46429326-46429616	0.101669	0.590483	-0.499948	1.09043	-1.18304	0.191306	-6.18403	3.51019e-09	6.51283e-07	-0.886639	0.193713	-1.96699	2.1607	0.000317614	cg10296238rs11908812	rs11908812	21	cg10296238	C21orf56	46429602	46402058	-1.85672	0.0702108	FALSE	-10.8685	1.26e-17	TRUE
cg20491707	PPYR1	10	46.5033	5540	+	36.1	NCBI:RefSeq	CGCCCACCTCAACCCTGGATACAGGCAGGCTGGAGCTGCGCTGTCTTTCT	46503540	+	Y4; PP1; NPY4R; NPY4-R; MGC116897;	NM_005972.3	GI:57527791	go_component: integral to plasma membrane; go_function: receptor activity; go_function: neuropeptide Y receptor activity; go_function: rhodopsin-like receptor activity; go_process: digestion; go_process: circulation; go_process: signal transduction; go_process: feeding behavior; go_process: G-protein coupled receptor protein signaling pathway	pancreatic polypeptide receptor 1	251	TRUE	10:46503207-46503757	-1.64146	-1.48667	-1.83196	0.345289	-0.349398	0.0642153	-5.44104	1.55363e-07	1.50929e-05	-2.92377	-2.49996	-3.34759	0.84763	2.39889e-07
cg26256793	COL11A1	1	103.347	1301	-	36.1	NCBI:RefSeq	CGGGTGCAAGTAGACAAGTAGCTGTTTTTATTGAATACAGAAGCTCCTTG	103346640	-	STL2; COLL6; CO11A1;	NM_001854.2	GI:18375517	isoform A preproprotein is encoded by transcript variant A; collagen XI; alpha-1 polypeptide; collagen XI alpha 1; go_component: collagen; go_component: cytoplasm; go_component: collagen type XI; go_function: protein binding; bridging; go_function: extracellular matrix structural constituent; go_function: extracellular matrix structural constituent; go_process: cell adhesion; go_process: phosphat…	alpha 1 type XI collagen isoform A preproprotein	417	TRUE	1:103346874-103347272	-3.33233	-3.09402	-3.62563	0.531605	-0.502536	0.0740679	-6.7848	1.31437e-10	4.58803e-08	-2.70296	-2.36875	-3.03717	0.668424	7.30768e-06
cg04431054	LOC133619	5	126.881	133619	+	36.1	NCBI:RefSeq	TAACTGATCTTATCCCTTGGGCCGCTGTGGCACAGGATGAGTGAGCTACG	126881247	+		NM_130809.2	GI:31377624		hypothetical protein LOC133619	324	TRUE	5:126880890-126881840	-0.470833	-0.326974	-0.64789	0.320917	-0.35139	0.0889727	-3.94942	0.000108865	0.00232098	-2.21754	-1.69457	-2.74051	1.04594	5.12918e-05	cg04431054rs182844	rs182844	5	cg04431054	LOC133619	126880923	126875628	8.25324	5.85e-11	TRUE	-8.9273	1.35e-13	TRUE
cg04317399	HOXA4	7	27.1368	3201	-	36.1	NCBI:RefSeq	TCACAAATTAATGACCATGAGCTCGTTTTTGATAAACTCCAACTACATCG	27136924	-	HOX1; HOX1D;	NM_002141.2	GI:24497492	homeobox protein HOX-A4; Hox-1.4-like protein; Dfd-like protein; go_component: nucleus; go_function: transcription factor activity; go_process: morphogenesis; go_process: regulation of transcription; DNA-dependent	homeobox protein A4	86	TRUE	7:27136060-27137536	0.280912	0.404818	0.128412	0.276407	-0.274054	0.0942478	-2.9078	0.00405514	0.0299661	-0.0499503	0.425281	-0.525182	0.950462	8.1336e-06
cg02283643	SULF1	8	70.5413	23213	+	36.1	NCBI:RefSeq	GAATGAATTATTCTGATGACCAGTTGTGCGTTACTTTTCACAACTCCTCG	70541427	+	SULF-1; HSULF-1; KIAA1077;	NM_015170.1	GI:29789063	sulfatase FP; go_component: Golgi stack; go_component: cell surface; go_component: endoplasmic reticulum; go_component: extracellular space; go_function: hydrolase activity; go_function: arylsulfatase activity; go_process: apoptosis; go_process: metabolism; go_process: heparan sulfate proteoglycan metabolism	sulfatase 1	133	FALSE		-3.5912	-3.38201	-3.84867	0.466653	-0.425813	0.0856609	-4.97091	1.43939e-06	8.42167e-05	-4.62449	-4.33375	-4.91522	0.581472	0.000328262
cg14175438	FAM3C	7	120.824	10447	-	36.1	NCBI:RefSeq	CGCCAGTTAGGTCATCTTATATATCTTGAGATAGCTGAGATGGTCAGATC	120823577	-	GS3786;	NM_014888.1	GI:7661713	go_component: extracellular region; go_function: cytokine activity; go_process: biological process unknown	predicted osteoblast protein	388	TRUE	7:120822943-120824044	-1.95096	-1.91081	-2.00038	0.0895735	-0.105684	0.0361058	-2.92706	0.00382216	0.0287604	-5.72062	-5.50619	-5.93505	0.428855	0.000551139
cg27519373	ZIM2	19	62.0421	23619	-	36.1	NCBI:RefSeq	CGGGGCTTGAACAGACCGTCCCGCCCATGCCACCTGCAGCCACTTCAGCC		-	9606;	NT_011109.15	zinc finger; imprinted 2	go_component: nucleus; go_function: DNA binding; go_function: metal ion binding; go_function: zinc ion binding; go_process: transcription; go_process: regulation of transcription; DNA-dependent			TRUE	19:62041489-62042391	0.790116	0.922457	0.627235	0.295222	-0.252529	0.0962575	-2.62347	0.00938179	0.0521788	-0.791062	-0.503965	-1.07816	0.574194	0.000811826
cg08471713	MEOX1	17	39.0944	4222	-	36.1	NCBI:RefSeq	TCAAATCTTTGAAAGGACCGAGGCGTGCAGCGGACAGCAGATGGATCCCG	39094457	-	MOX1;	NM_013999.2	GI:21396476	isoform 2 is encoded by transcript variant 2; Mesenchyme homeo box 1 (Mox1; mouse; homolog of); go_component: nucleus; go_function: transcription factor activity; go_process: development; go_process: regulation of transcription; DNA-dependent	mesenchyme homeo box 1 isoform 2	38	FALSE		0.390228	0.752417	-0.0555436	0.80796	-0.840894	0.210243	-3.99963	8.95535e-05	0.00198745	1.40532	2.23754	0.573097	1.66445	7.28085e-07
cg10756887	C22orf15	22	22.4357	150248	+	36.1	NCBI:RefSeq	CCCTTGTGAATGAGCAGGACTCAGCTCGGGTTTTCCCTTTAAGGGACTCG	22435208	+	N27C7-3; FLJ36561;	NM_182520.1	GI:32698877	synonyms: N27C7-3; FLJ36561	hypothetical protein LOC150248	484	TRUE	22:22435485-22436065	-2.93697	-2.73937	-3.18017	0.440804	-0.514485	0.162139	-3.17312	0.00174857	0.0168279	-3.60554	-3.44386	-3.76721	0.323353	0.0505296	cg10756887rs2267032	rs2267032	22	cg10756887	C22orf15	22435692	22478273	1.71713	0.089685	FALSE	-6.40669	7.9e-09	TRUE
cg04574442	ALG8	11	77.5286	79053	-	36.1	NCBI:RefSeq	CGCACTAGTGGAGAAGCCAGGATTGTTGCCCTAGAGTTACAGTAGATAAA	77528343	-	MGC2840;	NM_001007028.1	GI:55743089	isoform c is encoded by transcript variant 3; dolichyl pyrophosphate Glc1Man9GlcNAc2 alpha-1;3-glucosyltransferase; dolichyl-P-Glc:Glc1Man9GlcNAc2-PP-dolichyl glucosyltransferase; HUSSY-02; go_component: membrane; go_component: integral to membrane; go_component: endoplasmic reticulum; go_function: transferase activity; transferring glycosyl groups; go_process: transport; go_process: protein amin…	alpha-1;3-glucosyltransferase ALG8 isoform c	282	TRUE	11:77527951-77528656	-5.22113	-5.34081	-5.07383	-0.266975	0.252247	0.076843	3.28263	0.00121569	0.0130198	-6.71333	-6.99842	-6.42824	-0.570179	5.7647e-09
cg26301908	SOCS1	16	11.2584	8651	-	36.1	NCBI:RefSeq	ATCACGTCTGAGAATGCACCATTTTTTCACTGGGCTCCAATTTGATGTCG	11257540	-	JAB; CIS1; SSI1; TIP3; CISH1; SSI-1; SOCS-1;	NM_003745.1	GI:4507232	STAT induced SH3 protein 1; Tec-interacting protein 3; JAK binding protein; cytokine-inducible SH2 protein 1; go_component: cytoplasm; go_function: protein kinase binding; go_function: protein kinase inhibitor activity; go_function: insulin-like growth factor receptor binding; go_process: ubiquitin cycle; go_process: JAK-STAT cascade; go_process: regulation of cell growth; go_process: intracellul…	suppressor of cytokine signaling 1	876	FALSE		-4.6257	-4.70533	-4.52769	-0.177635	0.191492	0.0536653	3.56827	0.000450788	0.00646967	-5.69862	-5.82778	-5.56945	-0.258334	0.0320109
cg13846555	PSMB10	16	66.5282	5699	-	36.1	NCBI:RefSeq	AGACAAGCGGGGCCAGTGAGCAGCTAAAAAGTCCTCTGCTAGGCTTCACG	66528254	-	LMP10; MECL1; MGC1665;	NM_002801.2	GI:23110923	proteasome MECl-1; macropain subunit MECl-1; multicatalytic endopeptidase complex subunit MECl-1; proteasome catalytic subunit 2i; proteasome subunit beta 7i; proteasome subunit MECL1; go_component: proteasome core complex (sensu Eukaryota); go_function: threonine endopeptidase activity; go_process: proteolysis; go_process: humoral immune response; go_process: ubiquitin-dependent protein cataboli…	proteasome beta 10 subunit proprotein	4	TRUE	16:66526901-66528387	-5.10306	-5.16832	-5.02273	-0.14559	0.175222	0.0627936	2.79044	0.00577836	0.0379602	-5.92441	-6.02733	-5.82148	-0.205844	0.000131492
cg14865516	PAIP1	5	43.5935	10605	-	36.1	NCBI:RefSeq	CGAAGCTTGTTAAACGTAGGTGTGACCTACTGTGGTAAACACCTAGGGTG	43593244	-	MGC12360;	NM_182789.2	GI:34452727	isoform 2 is encoded by transcript variant 2; polyadenylate binding protein-interacting protein 1; PABC1-interacting protein 1; go_component: cytoplasm; go_function: RNA binding; go_function: RNA binding; go_function: protein binding; go_function: protein binding; go_function: translation activator activity; go_process: mRNA stabilization; go_process: translational initiation; go_process: positiv…	poly(A) binding protein interacting protein 1 isoform 2	264	TRUE	5:43592001-43594001	-4.90654	-5.02058	-4.76619	-0.254385	0.244417	0.0832539	2.9358	0.00372052	0.0282746	-5.65676	-5.93554	-5.37798	-0.557564	0.000187747
cg09058381	EAF1	3	15.4438	85403	+	36.1	NCBI:RefSeq	CGCTCAGGGCTCACCGTCATCAGTTCCTAAATTCACCTGCAGGGCTAGGG	15443866	+		NM_033083.5	GI:38788179	ELL (eleven nineteen lysine-rich leukemia gene)-associated factor 1; 4933403C17Rik; go_component: nucleus; go_process: transcription; go_process: regulation of transcription; DNA-dependent	ELL associated factor 1	17	TRUE	3:15443407-15444789	-4.74672	-4.85992	-4.6074	-0.252521	0.249155	0.0928426	2.68363	0.00789915	0.0465874	-6.91528	-7.06419	-6.76638	-0.297814	0.0046834
cg22409223	PIK3R4	3	131.948	30849	-	36.1	NCBI:RefSeq	CGGGAGAGAAGTGCAGACCGCCAGTCCCAAGAAAACACTACACTTCAGCT	131948335	-	p150; VPS15; MGC102700;	NM_014602.1	GI:23943911	phosphatidylinositol 3-kinase-associated p150; go_component: cellular component unknown; go_function: ATP binding; go_function: nucleotide binding; go_function: transferase activity; go_function: protein serine/threonine kinase activity; go_process: protein amino acid phosphorylation	phosphoinositide-3-kinase; regulatory subunit 4; p150	73	TRUE	3:131947805-131948570	-3.50674	-3.57793	-3.41912	-0.158814	0.184705	0.053016	3.48395	0.000608168	0.00807037	-3.60837	-3.70779	-3.50895	-0.198841	3.86403e-05
cg27497687	MED19	11	57.2362	219541	-	36.1	NCBI:RefSeq	CGGCACTGTTTGGGGCTCAGGCTGACCCACCACCGCCCCCAACCGCACTC	57236249	-	LCMR1;	NM_153450.1	GI:23592231	lung cancer metastasis-related protein 1; go_component: microtubule; go_function: protein binding; go_function: structural molecule activity; go_process: microtubule-based movement	mediator of RNA polymerase II transcription; subunit 19 homolog	36	TRUE	11:57235306-57237081	-5.14049	-5.24353	-5.01367	-0.229865	0.209314	0.0686657	3.04831	0.00261559	0.0220771	-5.42185	-5.51896	-5.32473	-0.194231	0.00189925
cg21872129	PTP4A1	6	64.34	7803	+	36.1	NCBI:RefSeq	CGATTCAGGCAAACTTCGAGTCTCCTCATGTGACATGTGTGCACTCCTGG	64339879	+	HH72; PRL1; PRL-1; PTPCAAX1; PTP(CAAX1); DKFZp779M0721;	NM_003463.3	GI:62865860	Protein tyrosine phosphatase IVA1; go_component: membrane; go_component: endoplasmic reticulum; go_function: hydrolase activity; go_function: protein tyrosine phosphatase activity; go_process: cell cycle; go_process: development; go_process: protein amino acid dephosphorylation	protein tyrosine phosphatase type IVA; member 1	76	TRUE	6:64339688-64341818	-4.94763	-5.04112	-4.83256	-0.208561	0.2549	0.0863401	2.95228	0.00353561	0.0271904	-7.14521	-7.29931	-6.9911	-0.308201	0.00455935
cg24446548	TWIST1	7	19.1238	7291	-	36.1	NCBI:RefSeq	CGCCCAACTCCCAGACACCTCGCGGGCTCTGCAGCACCGGCACCGTTTCC	19123820	-	SCS; ACS3; BPES2; BPES3; TWIST;	NM_000474.3	GI:68160957	blepharophimosis; epicanthus inversus and ptosis 3; acrocephalosyndactyly 3; TWIST homolog of drosophila; blepharophimosis; epicanthus inversus; and ptosis 2; H-twist; B-HLH DNA binding protein; go_component: nucleus; go_function: DNA binding; go_function: protein binding; go_function: enzyme inhibitor activity; go_function: RNA polymerase II transcription factor activity; go_process: morphogenes…	twist	32	TRUE	7:19122442-19124663	-3.92473	-4.00779	-3.82251	-0.185287	0.194747	0.060686	3.2091	0.00155336	0.0154922	-3.93756	-4.00175	-3.87337	-0.128381	0.0478903
cg11695601	CHN1	2	175.579	1123	-	36.1	NCBI:RefSeq	CGCACCAGGTCCCCAGATGACCCTGCCTGGGCGCTGCGTTCACTCAGCAT	175578361	-	CHN; ARHGAP2; RHOGAP2;	NM_001025201.1	GI:68533256	Chimerin 1 (GTPase-activating protein; rho; 2); n-chimerin; go_function: metal ion binding; go_function: diacylglycerol binding; go_function: GTPase activator activity; go_function: SH3/SH2 adaptor activity; go_process: intracellular signaling cascade	chimerin (chimaerin) 1	320	TRUE	2:175577503-175578727	-4.6242	-4.75055	-4.46868	-0.281876	0.255987	0.080298	3.18796	0.00166544	0.0162789	-6.93829	-7.10119	-6.77538	-0.325805	0.0242597
cg03664139	ASCC3	6	101.436	10973	-	36.1	NCBI:RefSeq	CGCGGCAGACTGAAGTAAATGCAGGGAAAAAACTCACAGGTAGAGAGGTA	101435945	-	RNAH; HELIC1; ASC1p200; MGC26074; DJ467N11.1; dJ121G13.4;	NM_006828.2	GI:76880485	isoform a is encoded by transcript variant 1; RNA helicase family; ASC-1 complex subunit P200; dJ467N11.1 protein; helicase; ATP binding 1; B630009I04Rik; go_function: ATP binding; go_function: hydrolase activity; go_function: nucleotide binding; go_function: nucleic acid binding; go_function: ATP-dependent helicase activity; go_function: nucleoside-triphosphatase activity; go_process: transcript…	activating signal cointegrator 1 complex subunit 3 isoform a	280	TRUE	6:101435363-101436318	-6.21912	-6.29812	-6.12187	-0.176249	0.184099	0.065575	2.80746	0.00549293	0.0366937	-10.2834	-10.7057	-9.86103	-0.844692	0.0472489
cg03731616	MYLK	3	125.086	4638	-	36.1	NCBI:RefSeq	TCCTACACTGGGAGACCTAGGCCTTAGGTCGGGGTCTGATGCTAGCTTCG	125085839	-	KRP; MLCK; MLCK108; MLCK210; FLJ12216; DKFZp686I10125;	NM_005965.3	GI:47132559	isoform 6 is encoded by transcript variant 6; myosin light chain kinase; go_function: ATP binding; go_function: kinase activity; go_function: calmodulin binding; go_function: nucleotide binding; go_function: calcium ion binding; go_function: transferase activity; go_function: magnesium ion binding; go_function: signal transducer activity; go_function: protein-tyrosine kinase activity; go_function…	myosin light chain kinase isoform 6	469	TRUE	3:125085102-125086419	-3.76142	-3.86408	-3.63508	-0.228999	0.218257	0.0468827	4.65537	5.91657e-06	0.000259259	-3.29198	-3.63149	-2.95246	-0.679022	0.0248062
cg25510610	WHSC1L1	8	38.3601	54904	-	36.1	NCBI:RefSeq	ACAGAGTATCGGTTTCCTCATTTGCTTGCTGCCTCTGTTTCCTTTTTACG	38358947	-	NSD3; pp14328; FLJ20353;	NM_023034.1	GI:13699810	chromatin modulator isoform long is encoded by transcript variant long; Wolf-Hirschhorn syndrome candidate 1-like 1 protein; go_component: nucleus; go_component: ubiquitin ligase complex; go_function: protein binding; go_function: zinc ion binding; go_function: metal ion binding; go_function: ubiquitin-protein ligase activity; go_process: cell growth; go_process: transcription; go_process: cell d…	WHSC1L1 protein isoform long	1104	TRUE	8:38358099-38360064	-4.9824	-5.06813	-4.87688	-0.191246	0.204701	0.074614	2.74346	0.00663767	0.0414628	-6.99206	-7.17517	-6.80894	-0.366236	0.00129481
cg15170424	TMEM55A	8	92.1221	55529	-	36.1	NCBI:RefSeq	AGAGGGATCTACGCTGGCCTTACCTCTGGGGCTGCTTTCTTGCAAGTACG	92122227	-	DKFZp762O076;	NM_018710.1	GI:24308164	synonym: DKFZp762O076	transmembrane protein 55A	154	TRUE	8:92121970-92122362	-5.2947	-5.37473	-5.19621	-0.178513	0.194777	0.0737506	2.64102	0.00892531	0.0504714	-5.63225	-5.7141	-5.5504	-0.163699	0.00391092
cg25245322	OBFC2B	12	54.9045	79035	+	36.1	NCBI:RefSeq	AGCATCCGGCGGCAGCGGAGCCTGTGGCTCCCCCTGCGGGCTGCTCAGCG	54904774	+	MGC2731;	NM_024068.2	GI:34147355	LP3587; go_function: nucleic acid binding	hypothetical protein LOC79035	311	TRUE	12:54903894-54904729	-4.81669	-4.92585	-4.68235	-0.243508	0.261308	0.0763432	3.42281	0.000753052	0.00934846	-5.39185	-5.52118	-5.26251	-0.258666	0.00516483
cg16094520	SHMT1	17	18.2078	6470	-	36.1	NCBI:RefSeq	CCTGCAAACTAAAAGTAGTACCATGAACAAAATTCACTCATAATCCCACG	18207581	-	SHMT; CSHMT; MGC15229; MGC24556;	NM_004169.3	GI:22547185	isoform 1 is encoded by transcript variant 1; cytoplasmic serine hydroxymethyltransferase; 14 kDa protein; go_component: cytosol; go_function: transferase activity; go_function: glycine hydroxymethyltransferase activity; go_process: L-serine catabolism; go_process: glycine metabolism; go_process: L-serine metabolism; go_process: one-carbon compound metabolism	serine hydroxymethyltransferase 1 (soluble) isoform 1	267	TRUE	17:18206917-18207872	-4.18838	-4.23334	-4.13304	-0.100299	0.116102	0.0376597	3.08294	0.002342	0.0204813	-4.41967	-4.52068	-4.31865	-0.202032	3.54199e-05
cg26022315	SNF8	17	44.3768	11267	-	36.1	NCBI:RefSeq	TTTACCCAAGTTTAACTACAAATGGGATTCTACTCACAAATCTACAGTCG	44377153	-	Dot3; EAP30; VPS22;	NM_007241.2	GI:21361379	go_component: nucleus; go_process: transcription; go_process: protein transport; go_process: regulation of transcription; DNA-dependent	EAP30 subunit of ELL complex	350	TRUE	17:44376248-44377500	-4.97123	-5.04249	-4.88352	-0.158974	0.176641	0.0474716	3.72098	0.000258494	0.00435653	-5.24435	-5.46531	-5.02339	-0.441912	0.00731547
cg13162810	PREI3	2	198.088	25843	+	36.1	NCBI:RefSeq	CGTAGATAAAAGACGCAGATGTCAATTATGTGAGATGAAGAGTGGACATC	198088565	+	2C4D; MOB1; MOB3; CGI-95; MGC12264;	NM_015387.2	GI:41349448	isoform 1 is encoded by transcript variant 1; go_component: membrane; go_component: Golgi stack; go_function: metal ion binding; go_process: transport	preimplantation protein 3 isoform 1	123	FALSE		-5.39143	-5.51453	-5.23993	-0.274604	0.328755	0.078742	4.17509	4.46089e-05	0.0011916	-6.07915	-6.34058	-5.81772	-0.522858	9.16934e-06
cg01116966	TCF7	5	133.478	6932	+	36.1	NCBI:RefSeq	TTGGGACTTGGGCGTGGCTTACCATCGCAGCCGTGGTGTGAACTGTATCG	133478301	+	TCF-1; MGC47735;	NM_201633.1	GI:42518073	isoform 3 is encoded by transcript variant 3; Transcription factor-7; T-cell specific; go_component: nucleus; go_function: DNA binding; go_function: RNA polymerase II transcription factor activity; go_process: transcription; go_process: immune response; go_process: Wnt receptor signaling pathway; go_process: regulation of transcription; DNA-dependent; go_process: regulation of transcription from …	transcription factor 7 (T-cell specific; HMG-box) isoform 3	385	TRUE	5:133477085-133479284	-6.1596	-6.37511	-5.89435	-0.480762	0.48592	0.149072	3.25964	0.00131315	0.013749	-7.50827	-7.80682	-7.20972	-0.597102	3.36958e-05
cg18755783	SPG20	13	35.8179	23111	-	36.1	NCBI:RefSeq	TAAAGAGTAAAATCACGCGCAATCCATCCCAATATAACCGCAGTTGTTCG	35818453	-	SPARTIN; TAHCCP1; KIAA0610;	NM_015087.3	GI:40806197	trans-activated by hepatitis C virus core protein 1	spartin	548	TRUE	13:35817747-35819118	-6.14707	-6.27648	-5.9878	-0.288676	0.307473	0.098304	3.12778	0.00202689	0.0186606	-4.35194	-4.56309	-4.14078	-0.422318	0.0336494
cg19914751	QARS	3	49.1176	5859	-	36.1	NCBI:RefSeq	CGCTTTTGACGCCACAGCTTTGGAGTTGTCATGGAAACAGTTGAACAAAT	49117175	-	GLNRS; PRO2195;	NM_005051.1	GI:4826959	glutamine-tRNA synthetase; go_component: cytoplasm; go_component: soluble fraction; go_function: ATP binding; go_function: ligase activity; go_function: nucleotide binding; go_function: protein binding; go_function: glutamate-tRNA ligase activity; go_function: glutamine-tRNA ligase activity; go_process: protein biosynthesis; go_process: glutamyl-tRNA aminoacylation; go_process: glutaminyl-tRNA am…	glutaminyl-tRNA synthetase	401	TRUE	3:49116801-49118103	-4.66948	-4.78779	-4.52388	-0.263915	0.240308	0.0826979	2.90586	0.0040794	0.0300698	-6.63968	-6.82151	-6.45786	-0.363651	0.035861
cg20164558	PPP2R5D	6	43.0601	5528	+	36.1	NCBI:RefSeq	ACAAACCGCCAGGGTTCGGCTTCCAGAATTGGCTGAAGTGGGTGGTCCCG	43060308	+	MGC2134; MGC8949;	NM_006245.2	GI:31083266	isoform 1 is encoded by transcript variant 1; Serine/threonine protein phosphatase 2A; 56 kDa regulatory subunit; delta isoform; PP2A; B subunit; B delta isoform; PP2A; B subunit; B56 delta isoform; PP2A; B subunit; PR61 delta isoform; PP2A; B subunit; R5 delta isoform; go_component: nucleus; go_component: protein phosphatase type 2A complex; go_function: hydrolase activity; go_function: protein …	delta isoform of regulatory subunit B56; protein phosphatase 2A isoform 1	206	TRUE	6:43059826-43060575	-4.17405	-4.27471	-4.05017	-0.224532	0.204269	0.072474	2.81852	0.00531435	0.0358967	-4.7642	-4.87436	-4.65405	-0.220311	0.00350492
cg15269863	PRSS35	6	84.2791	167681	+	36.1	NCBI:RefSeq	CGGGAGCTCTGATCTCAGCTGACAGTGCCCTCGGGGACCAAACAAGCCTG	84278990	+	C6orf158; MGC46520; dJ223E3.1;	NM_153362.1	GI:23503296	go_function: peptidase activity; go_function: serine-type endopeptidase activity; go_process: proteolysis	protease; serine; 35	89	TRUE	6:84278721-84279111	-3.08552	-3.13953	-3.01905	-0.120476	0.132019	0.0336618	3.92192	0.000121061	0.00249324	-3.09371	-3.1895	-2.99792	-0.19158	2.54094e-06
cg09793001	TOP2B	3	25.6805	7155	-	36.1	NCBI:RefSeq	CGTCTCTGGAAGTCCTGACTGCCAGAGCGTAATGTGTACTTGAAACTTTG	25680792	-	TOPIIB; top2beta;	NM_001068.2	GI:19913407	topoisomerase (DNA) II beta (180kD); topo II beta; DNA topoisomerase II; 180 kD; topoisomerase II beta; DNA topoisomerase II beta; antigen MLAA-44; U937 associated antigen; topoisomerase IIb; go_component: nucleus; go_function: ATP binding; go_function: nucleotide binding; go_function: DNA topoisomerase (ATP-hydrolyzing) activity; go_process: DNA topological change	DNA topoisomerase II; beta isozyme	258	TRUE	3:25680335-25682057	-5.15996	-5.28448	-5.00671	-0.277778	0.290008	0.0725187	3.99908	8.97459e-05	0.00198958	-6.68222	-6.86149	-6.50295	-0.358548	0.0120569
cg19413110	POLR3GL	1	144.182	84265	-	36.1	NCBI:RefSeq	GCTTAGAACGCCACCGACTTGAGGAAGCCCAGTACATTTCAAGTTGGTCG	144181744	-	MGC3200; flj32422;	NM_032305.1	GI:14150063	synonyms: MGC3200; flj32422	polymerase (RNA) III (DNA directed) polypeptide G (32kD) like	32	TRUE	1:144181455-144182141	-4.11613	-4.22605	-3.98084	-0.245203	0.243431	0.064091	3.7982	0.000193816	0.00353243	-4.70799	-4.81322	-4.60276	-0.210458	0.00642926
cg12062995	RFC1	4	39.0446	5981	-	36.1	NCBI:RefSeq	ATATTGGTTTCCTTGGCAGGCGGGGTACCCAAGTACCTCCCGGTTACACG	39044390	-	A1; RFC; PO-GA; RECC1; MHCBFB; RFC140; MGC51786;	NM_002913.3	GI:32528305	replication factor C1; replication factor C (activator 1) 1 (145kD); MHC binding factor; beta; go_component: nucleus; go_component: DNA replication factor C complex; go_function: DNA binding; go_function: ATP binding; go_function: metal ion binding; go_function: nucleotide binding; go_function: protein binding; go_function: enzyme activator activity; go_function: nucleoside-triphosphatase activit…	replication factor C large subunit	217	TRUE	4:39043842-39045080	-4.49	-4.62629	-4.32225	-0.304043	0.311609	0.0709226	4.39366	1.8151e-05	0.000595255	-5.00981	-5.2957	-4.72393	-0.571766	4.07452e-06
cg20011794	KCTD17	22	35.7779	79734	+	36.1	NCBI:RefSeq	CGGGTGGTCAGGAACACCGTGCCCCCCACGTTGAGCCGCACCCACTTGCC	35777562	+	FLJ12242;	NM_024681.1	GI:13489098	go_component: membrane; go_component: voltage-gated potassium channel complex; go_function: protein self binding; go_function: voltage-gated potassium channel activity; go_process: potassium ion transport	potassium channel tetramerisation domain containing 17	299	TRUE	22:35777251-35778239	-4.78625	-4.85151	-4.70592	-0.145597	0.185639	0.0559588	3.31743	0.00108097	0.0120079	-4.31014	-4.40384	-4.21644	-0.187396	0.000169434
cg05793077	GSN	9	123.071	2934	+	36.1	NCBI:RefSeq	GGCGGGGTCGAGGTTATTAGCTCAGGTGCTAGCAGCACAGTGGAATCACG	123070228	+	DKFZp313L0718;	NM_000177.3	GI:38016941	isoform a is encoded by transcript variant 1; go_component: cytosol; go_component: actin cytoskeleton; go_component: extracellular region; go_component: extracellular region; go_function: actin binding; go_function: protein binding; go_function: calcium ion binding; go_process: actin filament severing; go_process: actin filament polymerization; go_process: barbed-end actin filament capping	gelsolin isoform a	337	TRUE	9:123069988-123070625	-4.91304	-4.99991	-4.80612	-0.193786	0.189007	0.0523987	3.60708	0.000392031	0.00585488	-4.1689	-4.30556	-4.03224	-0.273321	0.00272798
cg10671802	MGC23280	17	24.2544	147015	-	36.1	NCBI:RefSeq	AAGCGTTGCAGATGCATGCACATACCTAGCGTGCACTCACAGGGTGTACG	24254089	-		NM_144683.2	GI:34147700	go_function: oxidoreductase activity; go_process: metabolism	hypothetical protein LOC147015	315	TRUE	17:24253406-24254482	-5.23752	-5.35681	-5.0907	-0.266109	0.306318	0.0959572	3.19224	0.00164217	0.0161435	-4.62417	-4.88398	-4.36435	-0.519624	9.89885e-07
cg03446863	TFEB	6	41.8104	7942	-	36.1	NCBI:RefSeq	GAGGGAGCGCTCCGGGGTTGGTGTTCCCCAGGGTCATAGAATAACCCACG	41810776	-	TCFEB; AlphaTFEB;	NM_007162.1	GI:24307932	T-cell transcription factor EB; go_component: nucleus; go_component: nucleus; go_function: transcription regulator activity; go_function: transcription factor activity; go_process: regulation of transcription; go_process: regulation of transcription; DNA-dependent	transcription factor EB	372	TRUE	6:41809738-41811604	-4.08733	-4.18293	-3.96967	-0.213257	0.221732	0.0451923	4.9064	1.93212e-06	0.000107256	-4.26726	-4.34273	-4.19179	-0.150938	0.00153232
cg01267315	C1orf164	1	44.6436	55182	+	36.1	NCBI:RefSeq	CGCCAACTGAGTCTCTTGATCTGTACATGCAATCCCAGGCAGCTCGCGAA	44643547	+	FLJ10597; RP4-678E16.1;	NM_018150.2	GI:46397374	go_component: nucleus; go_component: ubiquitin ligase complex; go_function: zinc ion binding; go_function: metal ion binding; go_function: ubiquitin-protein ligase activity; go_process: protein ubiquitination	hypothetical protein LOC55182	16	TRUE	1:44643411-44646774	-4.5997	-4.68619	-4.49326	-0.192933	0.225369	0.0677178	3.32806	0.00104268	0.011728	-5.52715	-5.66306	-5.39123	-0.271831	0.000133027
cg01678893	CALR	19	12.9109	811	+	36.1	NCBI:RefSeq	CGGGTGGACTTCCCGCTGGATCGAATCCAAACACAAGTCAGATTTTGGCA	12910423	+	RO; SSA; cC1qR;	NM_004343.2	GI:5921996	Sicca syndrome antigen A (autoantigen Ro; calreticulin); go_component: cytosol; go_component: endoplasmic reticulum lumen; go_function: sugar binding; go_function: DNA binding; go_function: zinc ion binding; go_function: calcium ion binding; go_function: unfolded protein binding; go_process: protein folding; go_process: calcium ion homeostasis; go_process: regulation of apoptosis; go_process: pro…	calreticulin precursor	526	TRUE	19:12909908-12911465	-5.53547	-5.6237	-5.42688	-0.196824	0.224116	0.0559955	4.0024	8.8589e-05	0.00196817	-5.73328	-5.83387	-5.63269	-0.201175	0.00494071
cg12788471	ARPC5L	9	126.671	81873	+	36.1	NCBI:RefSeq	CGCCACCACACTTAGTACGAGGAGGCCGCCTGTACACAGAGGTGACCCTC	126671305	+	ARC16-2; MGC3038;	NM_030978.1	GI:13569955	go_component: cytoskeleton; go_process: regulation of actin filament polymerization	actin related protein 2/3 complex; subunit 5-like	507	TRUE	9:126670525-126672166	-6.11915	-6.22294	-5.9914	-0.231538	0.256592	0.0822571	3.11939	0.00208272	0.0189711	-7.11348	-7.23129	-6.99567	-0.235619	0.000430917
cg07051140	MGC15875	5	177.592	85007	-	36.1	NCBI:RefSeq	GAGTAAAGGCTGCCAAGCGAGGCTGACACAGCCGAACAGCGGTGAGGGCG	177592397	-	MGC45484; MGC117348;	NM_032921.1	GI:14249707	isoform 1 is encoded by transcript variant 1; go_function: transaminase activity; go_function: pyridoxal phosphate binding	hypothetical protein LOC85007 isoform 1	562	TRUE	5:177591693-177592655	-5.30729	-5.40689	-5.1847	-0.222194	0.280494	0.0875491	3.20385	0.00158051	0.0157098	-5.41082	-5.51795	-5.30369	-0.214265	0.000307289
cg08039281	PSMA6	14	34.8314	5687	+	36.1	NCBI:RefSeq	CGGGACATGTTGGTAGAAGCACTACTTTAAACACAATCCCTGGGCCCCGT	34831325	+	IOTA; p27K; PROS27; MGC2333; MGC22756; MGC23846;	NM_002791.1	GI:23110943	macropain subunit iota; prosomal P27K protein; proteasome subunit iota; proteasome iota chain; macropain iota chain; multicatalytic endopeptidase complex iota chain; 27 kDa prosomal protein; go_component: cytosol; go_component: protein complex; go_component: proteasome core complex (sensu Eukaryota); go_function: RNA binding; go_function: protein binding; go_function: threonine endopeptidase acti…	proteasome alpha 6 subunit	115	TRUE	14:34831030-34831780	-5.02703	-5.14312	-4.88416	-0.258967	0.280001	0.065984	4.24347	3.3794e-05	0.000970693	-3.97353	-4.15203	-3.79503	-0.356996	1.70463e-09
cg05375800	WDR31	9	115.142	114987	-	36.1	NCBI:RefSeq	CGGTTATGAGGGCCAACCTTGGGCTGGGTGGCGCTAGGTTCCCATCTTCG	115142388	-	FLJ35921;	NM_001006615.1	GI:55743154	isoform 2 is encoded by transcript variant 2	WD repeat domain 31 isoform 2	205	TRUE	9:115141737-115142680	-4.96788	-5.08824	-4.81975	-0.268486	0.223177	0.0615975	3.62315	0.000369883	0.00562609	-4.20933	-4.4752	-3.94345	-0.531748	9.76533e-09
cg13754949	REV1L	2	99.4721	51455	-	36.1	NCBI:RefSeq	CGGACAAGCAGCAAGGAAAAACAAGGGAGCAACAACCGCCTTCGGACATT	99472912	-	REV1; MGC26225;	NM_016316.1	GI:7706680	REV1 (yeast homolog)- like; go_component: nucleus; go_function: protein binding; go_function: protein binding; go_function: transferase activity; go_function: magnesium ion binding; go_function: damaged DNA binding; go_function: nucleotidyltransferase activity; go_process: DNA repair; go_process: mutagenesis; go_process: mutagenesis; go_process: response to UV; go_process: DNA replication; go_pro…	REV1-like	823	TRUE	2:99471876-99473753	-5.20936	-5.31058	-5.08479	-0.225797	0.203906	0.0554016	3.68051	0.000300065	0.00485836	-4.64811	-4.79707	-4.49914	-0.297925	0.000100472
cg27018070	FHL3	1	38.2432	2275	-	36.1	NCBI:RefSeq	CGGCCCCCATGCCTCGGGTCTGTCCACCAGTAACTCTGTACGCCCGGTGT	38243821	-	SLIM2; MGC8696; MGC19547; MGC23614;	NM_004468.3	GI:54112384	LIM-only protein FHL3; go_function: zinc ion binding; go_function: metal ion binding; go_process: muscle development	four and a half LIM domains 3	656	TRUE	1:38243079-38244093	-4.3713	-4.45524	-4.26799	-0.187248	0.172603	0.0654645	2.63659	0.00903869	0.0509029	-4.55543	-4.66167	-4.44918	-0.212484	0.00130778
cg11266874	ARL13B	3	95.182	200894	+	36.1	NCBI:RefSeq	CGGCCAGGACAGCTGGCTCCAGCCTACCTGACAGGCTCCCGCCACCGCTT	95181672	+	ARL2L1; MGC120611; MGC120612; DKFZp761H079;	NM_182896.1	GI:33598955	isoform 1 is encoded by transcript variant 1; ADP-ribosylation factor-like 2-like 1; go_function: GTP binding; go_process: intracellular protein transport	ADP-ribosylation factor-like 2-like 1 isoform 1	370	TRUE	3:95181302-95182275	-4.94293	-5.06322	-4.79488	-0.268337	0.246549	0.0899865	2.73984	0.00670845	0.0418035	-6.36343	-6.46802	-6.25884	-0.209182	0.0246229
cg13858139	ZNF43	19	21.8109	7594	-	36.1	NCBI:RefSeq	CGGTTTCCAGCCCAGCGTCCCTGATTGGATAACTTCTAAGGTCCTGCCCC	21810810	-	HTF6; KOX27; ZNF39L1; DKFZp686L1854;	NM_003423.2	GI:68303808	zinc finger protein 39-like 1 (KOX 27); go_component: nucleus; go_function: DNA binding; go_function: zinc ion binding; go_function: metal ion binding; go_function: nucleic acid binding; go_process: transcription; go_process: regulation of transcription; DNA-dependent	zinc finger protein 43 (HTF6)	74	FALSE		-3.52351	-3.5941	-3.43663	-0.157469	0.169518	0.0559499	3.02982	0.00277348	0.0229766	-3.13173	-3.26484	-2.99862	-0.266215	0.000321127
cg08063724	MYCL1	1	40.1397	4610	-	36.1	NCBI:RefSeq	CGACTCGTACCAGCACTATTTCTACGACTATGACTGCGGGGAGGATTTCT	40140274	-	LMYC; MYCL;	NM_005376.3	GI:74315993	isoform 2 is encoded by transcript variant 3; l-myc protein; myc-related gene from lung cancer; oncogene lmyc; v-myc avian myelocytomatosis viral oncogene homolog 1; lung carcinoma derived; go_component: nucleus; go_function: transcription factor activity; go_process: regulation of transcription; DNA-dependent	l-myc-1 proto-oncogene isoform 2	590	TRUE	1:40139114-40140976	-5.46279	-5.58018	-5.31832	-0.261852	0.294949	0.0955764	3.08601	0.00231906	0.0203499	-7.02048	-7.37285	-6.66811	-0.704744	0.0179122
cg14031452	NEDD1	12	95.8257	121441	+	36.1	NCBI:RefSeq	CGTCGGCCTGGGTTTAGGGACAGCGGCTACAGGAACCAATTCAACTACAC	95825375	+	FLJ35902;	NM_152905.2	GI:34303960	synonym: FLJ35902	neural precursor cell expressed; developmentally down-regulated 1	291	TRUE	12:95824814-95825997	-3.46681	-3.59153	-3.31332	-0.278207	0.277664	0.08129	3.41572	0.000771792	0.00950662	-3.3431	-3.47111	-3.21509	-0.256026	0.000645659
cg01161597	TAF2	8	120.914	6873	-	36.1	NCBI:RefSeq	CGACTAGCTCCTAGAAGCCGCCGTCGACAAGCTTCTGTCACAGAGATGCT	120914255	-	TAF2B; CIF150; TAFII150;	NM_003184.2	GI:20357590	TAF2 RNA polymerase II; TATA box binding protein (TBP)-associated factor; 150 kD; TATA box binding protein (TBP)-associated factor; RNA polymerase II; B; 150kD; cofactor of initiator function; 150kD subunit; go_component: transcription factor TFIID complex; go_function: binding; go_function: RNA polymerase II transcription factor activity; go_process: transcription initiation from RNA polymerase …	TBP-associated factor 2	96	TRUE	8:120913892-120914398	-4.30389	-4.42599	-4.15361	-0.272377	0.277729	0.0578501	4.80084	3.10927e-06	0.000158112	-3.89685	-3.91193	-3.88178	-0.0301542	0.000659343
cg26332534	HTR7	10	92.608	3363	-	36.1	NCBI:RefSeq	AAAATGCCCCCACTGAACTGTGGCTGACTAGTGTGCGGAGGCTGGGGTCG	92607651	-	5-HT7;	NM_019859.2	GI:30795198	isoform d is encoded by transcript variant d; serotonin 5-HT-7 receptor; go_component: integral to membrane; go_component: integral to plasma membrane; go_function: receptor activity; go_function: melanocortin receptor activity; go_function: serotonin receptor activity; go_function: rhodopsin-like receptor activity; go_process: circulation; go_process: signal transduction; go_process: circadian r…	5-hydroxytryptamine receptor 7 isoform d	392	TRUE	10:92606622-92608182	-4.30765	-4.40656	-4.18592	-0.220644	0.237421	0.0802265	2.95939	0.0034585	0.0267975	-6.37142	-6.64567	-6.09716	-0.548515	0.00175738
cg12238343	RLN3R1	5	33.9722	51289	+	36.1	NCBI:RefSeq	CGGAAACCTCATCCAAGCAGTCCCAGAGGAAACGGATAAAGGTATTTGAA	33972246	+	SALPR; GPCR135;	NM_016568.1	GI:7706102	somatostatin and angiotensin-like peptide receptor; G-protein coupled receptor SALPR; go_component: integral to plasma membrane; go_function: receptor activity; go_function: rhodopsin-like receptor activity; go_function: N-formyl peptide receptor activity; go_process: signal transduction; go_process: G-protein coupled receptor protein signaling pathway	relaxin 3 receptor 1	87	TRUE	5:33971758-33974643	-5.29315	-5.38876	-5.17548	-0.213274	0.260439	0.0728759	3.57373	0.000442055	0.00638437	-4.36728	-4.67314	-4.06142	-0.611723	0.0255513
cg16753336	NPAS1	19	52.2163	4861	+	36.1	NCBI:RefSeq	TGAACTGCCCCTTGGCACGGGGACAGAACATCGGGTGTGAATTGGACCCG	52215983	+	MOP5; PASD5;	NM_002517.2	GI:22027481	neuronal PAS1; member of PAS superfamily 5; go_component: nucleus; go_function: signal transducer activity; go_function: transcription factor activity; go_process: signal transduction; go_process: central nervous system development; go_process: regulation of transcription; DNA-dependent	neuronal PAS domain protein 1	323	TRUE	19:52214600-52217158	-3.85208	-3.93462	-3.7505	-0.184117	0.188279	0.0415717	4.52902	1.02252e-05	0.00039289	-3.80742	-3.88875	-3.72608	-0.162666	0.00165744
cg14360897	RNF167	17	4.78442	26001	+	36.1	NCBI:RefSeq	CGGGTTTCCGGGCACTTTTATTAGGTCGTCTTCTGGGCCACCAGTGCCCC	4784375	+	LP2254; DKFZP566H073; 5730408C10Rik;	NM_015528.1	GI:14149701	go_component: ubiquitin ligase complex; go_function: zinc ion binding; go_function: peptidase activity; go_function: ubiquitin-protein ligase activity; go_process: proteolysis; go_process: protein ubiquitination	ring finger protein 167	46	TRUE	17:4783546-4785167	-3.94066	-4.00397	-3.86275	-0.141224	0.172233	0.0520752	3.30739	0.00111835	0.012284	-3.8056	-3.90089	-3.71031	-0.190581	0.000551139
cg22983885	C1orf128	1	23.977	57095	+	36.1	NCBI:RefSeq	CGGCCAGACCTAAAGACTACTCCTGGGTCTGCTACTGGCCATTGTGACAC	23977470	+	HT014; TXNL1CL; RP5-886K2.4;	NM_020362.2	GI:21361836	TXNL1 C-terminal like; HT014	thioredoxin family Trp26	460	TRUE	1:23976437-23978046	-4.6416	-4.73854	-4.52229	-0.216259	0.214385	0.0624288	3.43408	0.000724118	0.00910453	-4.62477	-4.76897	-4.48058	-0.28839	0.000500789
cg15133363	HIG2	7	127.884	29923	+	36.1	NCBI:RefSeq	CGTGGCCCATCCCACGCCCACAGGTGCTGAGTTAGGCATCCCTGCCATGC	127883181	+	MGC138388;	NM_013332.1	GI:7019408	hypoxia-inducible protein 2 variant; go_component: membrane; go_component: integral to membrane; go_function: molecular function unknown; go_process: response to stress	hypoxia-inducible protein 2	320	TRUE	7:127882632-127883604	-4.46571	-4.55717	-4.35315	-0.204023	0.233546	0.0763487	3.05893	0.00252866	0.021502	-6.00098	-6.04675	-5.95522	-0.0915224	0.0302225
cg18592307	WDR76	15	41.9067	79968	+	36.1	NCBI:RefSeq	CCAGATGTGACTCTCCCACTATTTCTCGGGTTATTGATAAGAACCTTTCG	41906500	+	FLJ12973;	NM_024908.1	GI:13376366	go_process: transport	WD repeat domain 76	224	TRUE	15:41906061-41906864	-5.53108	-5.68648	-5.33983	-0.346644	0.340241	0.0676799	5.02721	1.11079e-06	6.78833e-05	-5.87822	-6.02061	-5.73584	-0.284775	0.00239034
cg11034861	FBXL8	16	65.7516	55336	+	36.1	NCBI:RefSeq	CGCCCCCTGGAGACCAGAATTTTCTGGTACCCCTGGGGATCCGGCTTCAA	65751392	+	FBL8; FLJ11278; MGC19959;	NM_018378.2	GI:22547145	go_process: ubiquitin cycle	F-box and leucine-rich repeat protein 8	188	TRUE	16:65750903-65752820	-3.56645	-3.66156	-3.44939	-0.212169	0.234113	0.0775168	3.02016	0.00285938	0.0234524	-4.58548	-4.68003	-4.49093	-0.189096	0.0336494
cg05959508	TRAF3IP3	1	207.996	80342	+	36.1	NCBI:RefSeq	ATGGGTAAAGCACACGCTTTCAATCCATAGGTCTGGGCCCCATTAACACG	207996147	+	T3JAM; FLJ44151; MGC117354; DJ434O14.3;	NM_025228.1	GI:13435126	TRAF3-interacting Jun N-terminal kinase (JNK)-activating modulator; go_component: integral to membrane; go_function: kinase activity	TRAF3-interacting JNK-activating modulator	12	FALSE		-5.44322	-5.51824	-5.35088	-0.167366	0.161893	0.0604586	2.67774	0.00803426	0.0470741	-5.70198	-5.86302	-5.54094	-0.32208	0.00516483
cg12241297	HNRPA0	5	137.118	10949	-	36.1	NCBI:RefSeq	TCACGGTGATTGGCTGAACTCAGATGTCTCTCAAGGGGCTGGCGCGAACG	137117938	-	hnRNPA0;	NM_006805.3	GI:52426775	hnRNA binding protein; go_component: heterogeneous nuclear ribonucleoprotein complex; go_function: RNA binding; go_function: nucleotide binding; go_process: mRNA processing	heterogeneous nuclear ribonucleoprotein A0	368	TRUE	5:137116654-137118954	-3.14453	-3.26085	-3.00136	-0.259491	0.277618	0.070721	3.92554	0.000119384	0.00246365	-4.44439	-4.54895	-4.33983	-0.209118	0.00866711
cg00415978	SYNPO2	4	120.029	171024	+	36.1	NCBI:RefSeq	CGGCCCACCTTCGAGGAAAGGAAAGCAGCTTCACACACAGGAGAATGTCC	120029444	+		NM_133477.1	GI:55741765	myopodin; genethonin 2; striated muscle specific; go_component: nucleus; go_function: actin binding; go_function: protein binding	synaptopodin 2	71	TRUE	4:120029225-120029718	-3.47537	-3.53352	-3.4038	-0.12972	0.11178	0.0412345	2.71084	0.00730092	0.0442503	-3.34667	-3.47868	-3.21465	-0.264032	0.000222459
cg17378989	ERCC1	19	50.6186	2067	-	36.1	NCBI:RefSeq	AGGGGCGTGGCGTTACAGAGCCTCTAGCGCTGGGTGTTGGGGACCTGACG	50619017	-	UV20;	NM_202001.1	GI:42544168	isoform 1 is encoded by transcript variant 1; excision repair protein; go_component: nucleus; go_component: nucleotide-excision repair complex; go_function: hydrolase activity; go_function: damaged DNA binding; go_function: endonuclease activity; go_process: DNA repair; go_process: nucleotide-excision repair	excision repair cross-complementing 1 isoform 1	426	TRUE	19:50618457-50619108	-2.64055	-2.76079	-2.49257	-0.268221	0.270212	0.0972679	2.77802	0.00599512	0.0388758	-3.33043	-3.50979	-3.15107	-0.358721	1.32593e-05
cg05334253	NDEL1	17	8.2796	81565	+	36.1	NCBI:RefSeq	CGGGAACACAGACACATGGACACTTGAAGGGCCTTGGTGGCCAGAAAACT	8279904	+	EOPA; NUDEL; MITAP1; DKFZp451M0318;	NM_001025579.1	GI:71284107	isoform A is encoded by transcript variant 1; NUDE-like protein; endooligopeptidase A; mitosin-associated protein MITAP1	nudE nuclear distribution gene E homolog like 1 (A. nidulans) isoform A	302	TRUE	17:8279555-8280782	-5.23835	-5.32517	-5.13148	-0.193696	0.20959	0.0618431	3.38905	0.000846282	0.0101274	-6.22129	-6.29181	-6.15078	-0.141024	0.0202516
cg02597269	MON1B	16	75.7826	22879	+	36.1	NCBI:RefSeq	CGACCCCTCCCAGAAGACACTTCCGGTTGCGGAGCTTTATTGGCTCCTCG	75782337	+	HSRG1; SAND2;	NM_014940.2	GI:38016939	HSV-1 stimulation-related gene 1; go_function: molecular function unknown; go_process: transport	MON1 homolog B	213	TRUE	16:75781506-75783185	-4.92857	-5.02811	-4.80607	-0.222041	0.223351	0.0811197	2.75335	0.00644768	0.0406707	-6.83875	-6.96379	-6.7137	-0.250091	0.0463003
cg22665276	ZNF85	19	20.898	7639	+	36.1	NCBI:RefSeq	TGCAGCCTGAGCTCTAGGTCTTGTTTTCCCTGCTTTGTGTTTTCTGCTCG	20897934	+	HPF4; HTF1; MGC78566;	NM_003429.1	GI:4508038	go_component: nucleus; go_component: intracellular; go_function: zinc ion binding; go_function: metal ion binding; go_function: nucleic acid binding; go_function: transcription factor activity; go_function: transcription corepressor activity; go_process: transcription; go_process: regulation of transcription; DNA-dependent	zinc finger protein 85 (HPF4; HTF1)	26	FALSE		-4.84299	-4.91078	-4.75956	-0.151227	0.175994	0.061918	2.84237	0.00494714	0.0340871	-5.21012	-5.34284	-5.0774	-0.265446	0.00103782
cg01412445	BBS4	15	70.7659	585	+	36.1	NCBI:RefSeq	CGCACCCCAAGAGGGACTACAGTCCTAGAACAGGACCTGTGCTGCTAAGT	70765588	+		NM_033028.2	GI:25952121	go_function: binding	Bardet-Biedl syndrome 4	290	TRUE	15:70765132-70765969	-5.30675	-5.44825	-5.1326	-0.31565	0.318988	0.0969146	3.29144	0.0011802	0.0127324	-7.65999	-8.06767	-7.25232	-0.815341	0.00584207
cg09875273	ERBB2	17	35.0975	2064	+	36.1	NCBI:RefSeq	TAAGGCTCTCATCACCTTAGGGGCTTCACTCACATTCATAAGAGACCTCG	35097919	+	NEU; NGL; HER2; TKR1; HER-2; c-erb B2; HER-2/neu;	NM_004448.2	GI:54792095	isoform a is encoded by transcript variant 1; v-erb-b2 avian erythroblastic leukemia viral oncogene homolog 2 (neuro/glioblastoma derived oncogene homolog); tyrosine kinase-type cell surface receptor; herstatin; neuroblastoma/glioblastoma derived oncogene homolog; c-erb B2/neu protein; go_component: membrane; go_component: plasma membrane; go_component: extracellular region; go_component: integra…	erbB-2 isoform a	406	TRUE	17:35097487-35098143	-4.62637	-4.70925	-4.52437	-0.184885	0.207	0.0786204	2.6329	0.00913392	0.0512151	-5.50491	-5.62325	-5.38656	-0.236683	0.00549404
cg00887101	KIAA1698	11	62.1772	80789	-	36.1	NCBI:RefSeq	CGGTAGAAACCCGGATCCTACCTCGAGAACTCACGTCAGGGTTCTCAGAT	62177350	-	INT5; INTS5;	NM_030628.1	GI:44771200	integrator complex subunit 5	KIAA1698 protein	196	TRUE	11:62176945-62178473	-3.68652	-3.78315	-3.5676	-0.215542	0.24666	0.0540946	4.55978	8.95929e-06	0.00035484	-3.10393	-3.13377	-3.07408	-0.0596882	3.41192e-05
cg19219437	PCOLCE2	3	144.09	26577	-	36.1	NCBI:RefSeq	CTGCTGCCGCGAGAGCTGGGTGGCGGCAGCCAGCAGCAGGCAGAGTGGCG	144090624	-	PCPE2;	NM_013363.2	GI:16904386	go_function: heparin binding	procollagen C-endopeptidase enhancer 2	219	TRUE	3:144089821-144091020	-4.96366	-5.1242	-4.76607	-0.358138	0.370569	0.0708391	5.23113	4.27115e-07	3.17561e-05	-5.12287	-5.27551	-4.97023	-0.305278	0.00296748
cg15557833	MGC33302	4	129.106	256471	-	36.1	NCBI:RefSeq	CGCGTCCCCGGTCCCTGCCTCCAGGCGCGTACACGGCGCGCTAAGAGGCG	129106554	-		NM_152778.1	GI:22749524	go_component: membrane; go_component: integral to membrane; go_function: transporter activity; go_process: transport	hypothetical protein LOC256471	247	TRUE	4:129104666-129106616	-2.81466	-2.94037	-2.65994	-0.280433	0.297242	0.0628344	4.73056	4.25042e-06	0.000200315	-1.91036	-1.9361	-1.88463	-0.0514709	0.000175343
cg24615044	MGC3123	17	39.6202	79089	+	36.1	NCBI:RefSeq	GGACAACTGGTCTTATCACGGAGGCTGGGGCCAGGCAGCCCTTCGGTTCG	39620100	+	FP2653;	NM_024107.1	GI:13129117	isoform 1 is encoded by transcript variant 1; go_process: protein modification	hypothetical protein LOC79089 isoform 1	117	TRUE	17:39618737-39620518	-5.33694	-5.42907	-5.22355	-0.20552	0.214341	0.050573	4.23825	3.45218e-05	0.000988842	-5.61796	-5.72311	-5.51281	-0.210307	0.00451866
cg15211655	OSBPL1A	18	20.2313	114876	-	36.1	NCBI:RefSeq	GCACGCAGCTGAAGATCTGGTAGGGGATGCATGCGGCACCAGCATGGTCG	20231788	-	ORP1; OSBPL1B; FLJ10217;	NM_080597.2	GI:19718740	isoform B is encoded by transcript variant OSBPL1B; oxysterol-binding protein-related protein 1; oxysterol-binding protein-like 1B; OSBP-related protein 1; oxysterol binding protein-like 1B; go_component: intracellular; go_function: phospholipid binding; go_process: lipid transport; go_process: steroid metabolism; go_process: cholesterol metabolism; go_process: vesicle-mediated transport	oxysterol-binding protein-like 1A isoform B	450	TRUE	18:20231148-20232231	-5.15557	-5.24603	-5.04423	-0.201795	0.212891	0.0672819	3.16416	0.00180059	0.017192	-5.76796	-5.86909	-5.66684	-0.202248	0.0429583
cg00729541	FAM73B	9	130.838	84895	+	36.1	NCBI:RefSeq	CGAGGGCTCAGCCTGCTTTGGCGTACTCCAAGAAAGCCCCTTGGAGGTCT	130839074	+	C9orf54; FLJ00199; FLJ14596;	NM_032809.2	GI:19923651	synonyms: C9orf54; FLJ00199; FLJ14596	hypothetical protein LOC84895	676	TRUE	9:130838221-130839507	-4.90993	-4.98736	-4.81464	-0.172715	0.155484	0.0498107	3.12151	0.00206849	0.0189	-4.89562	-5.04109	-4.75016	-0.290936	5.95818e-08
cg14343062	ERCC6	10	50.4166	2074	-	36.1	NCBI:RefSeq	CGTGACTTCCACGCAGCGTCTTAACTGCTGTCATCCTGTGACAGGCAGCC	50417078	-	CSB; CKN2; COFS; RAD26;	NM_000124.1	GI:4557564	Cockayne syndrome group B protein; Rad26 (yeast) homolog; go_component: nucleus; go_function: ATP binding; go_function: DNA binding; go_function: helicase activity; go_function: hydrolase activity; go_function: nucleotide binding; go_function: protein binding; go_function: protein binding; go_function: DNA helicase activity; go_function: RNA polymerase II transcription factor activity; go_process…	excision repair cross-complementing rodent repair deficiency; complementation group 6	504	TRUE	10:50416443-50417898	-4.85469	-4.93721	-4.75313	-0.184083	0.19618	0.0726297	2.7011	0.00751011	0.0450672	-6.30622	-6.48957	-6.12287	-0.366704	0.00100669
cg10971346	PIGV	1	26.9873	55650	+	36.1	NCBI:RefSeq	CGGCCCAAGGACCACTCCCGAGGGAGCCTGCAGAGCCCCACCAGGCCACA	26987073	+	FLJ20477; RP1-50O24.2;	NM_017837.2	GI:21361770	synonyms: FLJ20477; RP1-50O24.2	phosphatidylinositol glycan class V	259	TRUE	1:26986561-26987419	-4.8836	-4.99617	-4.74505	-0.251126	0.25429	0.067456	3.76971	0.000215658	0.0037832	-5.5535	-5.63895	-5.46805	-0.170896	0.0261228
cg18379495	ZNF703	8	37.6728	80139	+	36.1	NCBI:RefSeq	AGGACAGCGGCTGCAGGTACTCCGGGTGCAGGAGGTGACCGGTGTGAGCG	37672459	+	ZNF503L; FLJ14299;	NM_025069.1	GI:13376610	go_component: nucleus; go_function: zinc ion binding; go_function: metal ion binding; go_function: nucleic acid binding	zinc finger protein 703	367	TRUE	8:37670960-37675492	-3.81002	-3.94409	-3.64499	-0.299101	0.291155	0.0791478	3.67863	0.000302138	0.00488041	-4.53425	-4.70447	-4.36402	-0.340448	0.000795221
cg20884697	MANEA	6	96.1319	79694	+	36.1	NCBI:RefSeq	TTCTACTTGCAGAAATAGGGCGGGAGTGCAGTCTGACTCCAATCCACACG	96132134	+	hEndo; FLJ12838;	NM_024641.2	GI:41393555	mandaselin; alpha 1;2-endomannosidase; go_function: hydrolase activity; acting on glycosyl bonds; go_function: glycoprotein endo-alpha-1;2-mannosidase activity; go_process: carbohydrate metabolism	mannosidase; endo-alpha	192	TRUE	6:96131805-96132896	-4.89789	-4.95919	-4.82244	-0.136753	0.140441	0.0490201	2.86497	0.0046206	0.032556	-5.53223	-5.56261	-5.50185	-0.0607643	0.0204063
cg02937060	ANP32E	1	148.474	81611	-	36.1	NCBI:RefSeq	AGGGTCCGCGCACTGTCTGCTCCGGCGGCGCCCACTCCTCCGGGAAGCCG	148475082	-	LANPL; LANP-L; MGC5350;	NM_030920.2	GI:23463320	leucine-rich acidic nuclear protein like; acidic (leucine-rich) nuclear phosphoprotein 32 family; member E variant; go_component: nucleus; go_component: cytoplasmic membrane-bound vesicle; go_function: phosphatase inhibitor activity	acidic (leucine-rich) nuclear phosphoprotein 32 family; member E	943	TRUE	1:148473407-148474609	-3.96135	-4.02547	-3.88244	-0.143031	0.139298	0.0482895	2.88464	0.00435259	0.0313322	-3.76397	-3.86533	-3.66261	-0.20271	0.00291266
cg04447890	GPR177	1	68.4706	79971	-	36.1	NCBI:RefSeq	ACAGCTTCTTGGTGCTCATGTTTTCTATAATTGCCCCAGCCATTTTTGCG	68470841	-	MRP; C1orf139; FLJ23091; MGC14878; MGC131760;	NM_001002292.1	GI:50541962	isoform 2 is encoded by transcript variant 2; putative NFkB activating protein 373; go_function: signal transducer activity; go_process: positive regulation of I-kappaB kinase/NF-kappaB cascade	putative NFkB activating protein 373 isoform 2	265	TRUE	1:68470533-68471003	-2.73748	-2.82654	-2.62787	-0.198671	0.187619	0.0392042	4.7857	3.32688e-06	0.000167524	-3.41654	-3.54944	-3.28365	-0.265787	0.00455935
cg10801369	RFFL	17	30.4413	117584	-	36.1	NCBI:RefSeq	CGCTGGCTAACCATCCCCTGGGCCGCCCTGCTGCTTGGCGGTTTACTAAC	30440407	-	RNF189; RNF34L;	NM_057178.3	GI:62865647	fring; FYVE-RING finger protein SAKURA; go_component: membrane; go_component: ubiquitin ligase complex; go_function: DNA binding; go_function: zinc ion binding; go_function: metal ion binding; go_function: ubiquitin-protein ligase activity; go_process: apoptosis; go_process: protein ubiquitination	rififylin	885	TRUE	17:30441105-30441336	-4.13757	-4.22905	-4.02498	-0.204063	0.20758	0.0739387	2.80746	0.00549285	0.0367051	-3.80842	-4.05768	-3.55916	-0.49852	7.83053e-05
cg24680602	ZNF232	17	4.96712	7775	-	36.1	NCBI:RefSeq	GACCTGGGCTGGATCCTTAGGCTCCGAAGAGATGGGCCCCATCCTTGTCG	4967121	-	ZSCAN11;	NM_014519.2	GI:37574600	go_component: nucleus; go_function: zinc ion binding; go_function: metal ion binding; go_function: transcription factor activity; go_process: transcription; go_process: regulation of transcription; DNA-dependent	zinc finger protein 232	4	TRUE	17:4966375-4968109	-4.22832	-4.40164	-4.01499	-0.386645	0.345045	0.111473	3.09533	0.00225067	0.0198682	-2.04216	-2.51941	-1.5649	-0.954514	1.44096e-06
cg17850880	RNF6	13	25.694	6049	-	36.1	NCBI:RefSeq	CGGTGCATCCCAACCAATCACCAGCCAGCGGAGCGCAATAAGAAGGCAGT	25694508	-	DKFZp686P0776;	NM_005977.2	GI:34305291	isoform 1 is encoded by transcript variant 1; RING-H2 protein RNF-6; go_component: ubiquitin ligase complex; go_function: metal ion binding; go_function: zinc ion binding; go_function: ubiquitin-protein ligase activity; go_process: protein ubiquitination	ring finger protein 6 isoform 1	518	TRUE	13:25693582-25695045	-5.27152	-5.36848	-5.15219	-0.216282	0.222382	0.0822637	2.70329	0.0074627	0.0448611	-6.0636	-6.16393	-5.96327	-0.200654	0.00817055
cg15865742	SLC31A1	9	115.024	1317	+	36.1	NCBI:RefSeq	CGAGGAGGCCGGGATTGAAATCCATGGCCTCTGAGCTCTAAAATCTTCTG	115023689	+	CTR1; COPT1; hCTR1; MGC75487;	NM_001859.2	GI:40254457	copper transporter 1; go_component: integral to membrane; go_component: integral to plasma membrane; go_function: copper ion binding; go_function: copper ion transporter activity; go_function: copper ion transporter activity; go_process: ion transport; go_process: copper ion transport; go_process: copper ion transport	solute carrier family 31 (copper transporters); member 1	400	FALSE		-2.90401	-3.00616	-2.77828	-0.227882	0.208008	0.0633155	3.28526	0.001205	0.0129525	-3.60258	-3.67644	-3.52872	-0.147728	0.0119595
cg00746130	BAT5	6	31.7793	7920	-	36.1	NCBI:RefSeq	GAGCTACGGGTACAGCAGTGGTCCGAAACTAGTGGAAGACCACTAGAACG	31779067	-	NG26; D6S82E;	NM_021160.1	GI:15100150	HLA-B associated transcript-5; go_component: integral to membrane; go_function: catalytic activity; go_function: protein binding; go_function: protein binding	HLA-B associated transcript 5	183	TRUE	6:31778376-31779862	-5.2989	-5.48004	-5.07595	-0.404086	0.395273	0.132865	2.97499	0.00329462	0.0259773	-9.50652	-9.90479	-9.10824	-0.796555	0.0228532
cg07980518	RNF152	18	57.7114	220441	-	36.1	NCBI:RefSeq	CGCCTACTAGCAACAGTAAGCCCTAGGAAAGAAAGAAATCGGAGCAGGTG	57711284	-	FLJ39176;	NM_173557.1	GI:27734872	go_component: ubiquitin ligase complex; go_function: zinc ion binding; go_function: metal ion binding; go_function: ubiquitin-protein ligase activity; go_process: protein ubiquitination	ring finger protein 152	90	TRUE	18:57710982-57713397	-5.04464	-5.20772	-4.84392	-0.3638	0.361369	0.0965704	3.74203	0.000239089	0.00408973	-5.2579	-5.39714	-5.11867	-0.278469	0.036369
cg10262425	PGLS	19	17.4834	25796	+	36.1	NCBI:RefSeq	CCCTGCCGCTTGGTTTCGAGTACTTTGGGTGATTGTCTTTGGCACATGCG	17483432	+	6PGL;	NM_012088.2	GI:42794610	go_function: hydrolase activity; go_function: 6-phosphogluconolactonase activity; go_process: carbohydrate metabolism; go_process: pentose-phosphate shunt	6-phosphogluconolactonase	70	TRUE	19:17482765-17484345	-3.8617	-4.0117	-3.67709	-0.334613	0.3651	0.0663827	5.49993	1.16419e-07	1.16959e-05	-4.43943	-4.54986	-4.32901	-0.220849	0.00169016
cg09657265	SMPDL3A	6	123.152	10924	+	36.1	NCBI:RefSeq	CGCGCCCACCAGCCGTGGTCAACGCCGGACGCGTCAGGGGCCCCGCTAGC	123152123	+	ASM3A; ASML3a; FLJ20177; yR36GH4.1;	NM_006714.2	GI:34147321	acid sphingomyelinase-like phosphodiesterase; 0610010C24Rik; go_component: extracellular region; go_function: protein binding; go_function: hydrolase activity; acting on glycosyl bonds; go_process: carbohydrate metabolism	acid sphingomyelinase-like phosphodiesterase 3A	339	TRUE	6:123151903-123153198	-5.98021	-6.10835	-5.82251	-0.285844	0.313089	0.0639853	4.89315	2.05189e-06	0.00011239	-8.81296	-9.27363	-8.35229	-0.921344	0.0498586
cg06744574	C1orf165	1	49.0149	79656	-	36.1	NCBI:RefSeq	TGACAACCAGAAGGTGTACGCCGTGTACCGGGGCCCGGAGGAATTGGGCG	49015090	-	FLJ11588;	NM_024603.1	GI:13375806	synonym: FLJ11588	hypothetical protein LOC79656	144	TRUE	1:49014515-49015712	-6.12928	-6.26323	-5.96442	-0.298814	0.29899	0.0831424	3.59611	0.000407862	0.00602577	-7.97293	-8.54109	-7.40478	-1.13631	0.000909048
cg10040059	ZNF691	1	43.0846	51058	+	36.1	NCBI:RefSeq	CAGATTCTACAACTTCCCAGACGAGTGGCCCTGAGACTTGGGGCTGAACG	43084867	+	Zfp691; RP11-342M1.5;	NM_015911.2	GI:24475961	go_component: nucleus; go_function: zinc ion binding; go_function: metal ion binding; go_function: nucleic acid binding	zinc finger protein 691	275	TRUE	1:43084416-43085158	-3.94609	-4.04985	-3.81839	-0.231456	0.21798	0.0775701	2.8101	0.00544971	0.0365354	-4.57361	-4.66976	-4.47746	-0.192296	0.00130778
cg23620639	COL13A1	10	71.2312	1305	+	36.1	NCBI:RefSeq	CGTGGAGATCCACCCACAAGCCCTGACAATAACTCAGTCGAGTTCCTGGA	71231650	+		NM_005203.3	GI:22027564	isoform 1 is encoded by transcript variant 1; go_component: cytoplasm; go_component: plasma membrane; go_component: collagen type XIII; go_component: collagen type XIII; go_function: extracellular matrix structural constituent; go_process: phosphate transport	alpha 1 type XIII collagen isoform 1	433	FALSE		-5.14296	-5.23175	-5.03368	-0.19807	0.176634	0.0440213	4.01246	8.51699e-05	0.00191493	-4.71485	-4.83123	-4.59848	-0.232744	1.6115e-05
cg16442715	MAP3K7IP1	22	38.1262	10454	+	36.1	NCBI:RefSeq	CGGTACACTGTGGATGCTGCTGTTATTATCATTGCACGTCTGCTCGGTGT	38125705	+	TAB1; MGC57664;	NM_153497.2	GI:47717113	isoform beta is encoded by transcript variant beta; TAK1-binding protein 1; transforming growth factor beta-activated kinase-binding protein 1; go_function: catalytic activity; go_function: protein binding; go_function: enzyme activator activity; go_function: transforming growth factor beta receptor; cytoplasmic mediator activity; go_process: activation of MAPKKK activity	mitogen-activated protein kinase kinase kinase 7 interacting protein 1 isoform beta	447	TRUE	22:38125218-38126264	-5.05635	-5.12075	-4.97708	-0.143672	0.17325	0.0615172	2.81629	0.0053499	0.0360541	-4.47134	-4.8046	-4.13809	-0.666506	6.96013e-11
cg09155852	MAPKAP1	9	127.51	79109	-	36.1	NCBI:RefSeq	CGGAGAAAAGCCCTTAGTTCGTCCAGAAATGAGTGATGAGGCAGCTCAGC	127509334	-	MIP1; SIN1; SIN1b; SIN1g; MGC2745;	NM_001006620.1	GI:56788398	isoform 4 is encoded by transcript variant 4; ras inhibitor MGC2745; stress-activated map kinase interacting protein 1; SAPK-interacting protein 1; MEKK2-interacting protein 1; go_component: cellular component unknown; go_function: kinase activity; go_function: Ras GTPase binding; go_process: biological process unknown	mitogen-activated protein kinase associated protein 1 isoform 4	251	TRUE	9:127508843-127509640	-4.09285	-4.17569	-3.99089	-0.1848	0.186015	0.0444211	4.18753	4.24219e-05	0.00114807	-5.33581	-5.44089	-5.23073	-0.21016	0.00103782
cg06186861	ZNF501	3	44.7462	115560	+	36.1	NCBI:RefSeq	CGCACCTTGCAACACTCAGGTCCCTGGGTGCTGCCCTGCGGAAAGGAGTA	44746128	+	ZNF; MGC21738;	NM_145044.1	GI:21699063	zinc finger protein MGC21738; DNA-binding protein; go_component: nucleus; go_function: DNA binding; go_function: zinc ion binding; go_function: metal ion binding; go_process: transcription; go_process: regulation of transcription; DNA-dependent	zinc finger protein 501	50	TRUE	3:44745791-44746449	-4.1823	-4.26052	-4.08602	-0.174507	0.177595	0.0535589	3.31589	0.00108664	0.0120383	-4.20438	-4.39561	-4.01314	-0.382468	0.00195511
cg19793718	DHX37	12	124.04	57647	-	36.1	NCBI:RefSeq	GTGGTCTGGGAACCCACGTGGGCTGGGTTTCGGATTGCTCTGCTGGTCCG	124039620	-	DDX37; MGC2695; MGC4322; KIAA1517; MGC46245;	NM_032656.2	GI:29029600	DEAD/DEAH box helicase DDX37; DEAD/H (Asp-Glu-Ala-Asp/His) box polypeptide 37; go_function: ATP binding; go_function: hydrolase activity; go_function: nucleotide binding; go_function: nucleic acid binding; go_function: ATP-dependent helicase activity	DEAH (Asp-Glu-Ala-His) box polypeptide 37	66	TRUE	12:124039310-124040298	-4.98056	-5.07708	-4.86176	-0.215315	0.226486	0.0505204	4.48306	1.24431e-05	0.000453566	-4.40306	-4.55952	-4.2466	-0.312921	0.000105317
cg24267801	COX6C	8	100.975	1345	-	36.1	NCBI:RefSeq	CGGGAGAAACACCGGGGCCAGATAGGTCAAATGACCTCACCAAGGTCACA	100975071	-		NM_004374.2	GI:17999531	cytochrome c oxidase subunit VIc preprotein; go_component: mitochondrion; go_component: inner membrane; go_component: integral to membrane; go_function: oxidoreductase activity; go_function: cytochrome-c oxidase activity; go_process: electron transport	cytochrome c oxidase subunit VIc proprotein	388	TRUE	8:100974259-100975294	-4.87068	-4.96276	-4.75734	-0.20543	0.239189	0.0528665	4.5244	1.04299e-05	0.000396316	-4.85641	-4.90594	-4.80687	-0.0990766	0.0184737
cg22753607	ZCCHC7	9	37.1103	84186	+	36.1	NCBI:RefSeq	CGAGTCATTCAAATAATAGATGCAGCCTAGGTAGCTTCAAGAGAAGTTGG	37110633	+	AIR1; HSPC086; FLJ22611; RP11-397D12.1;	NM_032226.1	GI:24308321	go_function: zinc ion binding; go_function: metal ion binding; go_function: nucleic acid binding	zinc finger; CCHC domain containing 7	327	TRUE	9:37109887-37111179	-4.44244	-4.50448	-4.36608	-0.138394	0.190641	0.0577209	3.30282	0.00113576	0.0123958	-4.64144	-4.79491	-4.48796	-0.30695	0.000112998
cg07569756	LRRC59	17	45.8296	55379	-	36.1	NCBI:RefSeq	GAGCCTCAGCGACCTGAATGAGGTCCCGGTGAAGGAGCTGGTCAGTATCG	45829831	-	PRO1855; FLJ21675;	NM_018509.2	GI:40254923	synonyms: PRO1855; FLJ21675	hypothetical protein LOC55379	268	TRUE	17:45829193-45830221	-5.11719	-5.21995	-4.99073	-0.229222	0.200007	0.0685609	2.91722	0.00393962	0.0293866	-6.48292	-6.61627	-6.34958	-0.266697	0.00170674
cg06139836	EBF3	10	131.653	253738	-	36.1	NCBI:RefSeq	CGCCCCAAGTTGCCCAGATGCATGCAATAAATGCAAGGGGCTGCAGCTTG	131652081	-	COE3; O/E-2;	NM_001005463.1	GI:53828925	go_component: nucleus; go_function: DNA binding; go_function: zinc ion binding; go_function: metal ion binding; go_process: development; go_process: transcription; go_process: regulation of transcription; DNA-dependent	early B-cell factor 3	870	TRUE	10:131651113-131653881	-4.69588	-4.75634	-4.62147	-0.134877	0.136837	0.0522031	2.62125	0.00944105	0.0523388	-3.3248	-3.67526	-2.97434	-0.700923	0.010408
cg04837997	AP3S2	15	88.2387	10239	-	36.1	NCBI:RefSeq	CGGTGAATGGTGGAATTAAGGAATTTTTAGTGCATTTCCATTTAAAATCC	88238206	-	AP3S3; sigma3b; FLJ35955;	NM_005829.3	GI:39725670	adaptor complex sigma3B; clathrin-associated/assembly/adaptor protein; small 4; 22-kD; go_component: Golgi stack; go_component: clathrin vesicle coat; go_process: transport; go_process: intracellular protein transport	adaptor-related protein complex 3; sigma 2 subunit	513	TRUE	15:88237790-88239181	-4.92905	-5.02276	-4.81371	-0.209056	0.187484	0.0591106	3.17175	0.00175641	0.0168718	-4.62453	-4.75631	-4.49276	-0.26354	0.000149333
cg15161055	SITPEC	19	11.5006	51295	-	36.1	NCBI:RefSeq	CGTACACCATACCTCGGGGTTCAGATTTATAGGTGTTTTTTTGAAATTGA	11500930	-	ECSIT;	NM_016581.2	GI:20149632	synonym: ECSIT	evolutionarily conserved signaling intermediate in Toll pathway	375	TRUE	19:11500465-11501243	-4.77157	-4.8679	-4.65301	-0.21489	0.232126	0.0748219	3.10239	0.00220015	0.0195648	-6.1406	-6.31828	-5.96291	-0.355372	0.00966133
cg02772367	NUP160	11	47.827	23279	-	36.1	NCBI:RefSeq	GCACTCAGGTAACCTCAGCAAGTGGCAGCACCAAGGTTTACCACATTACG	47826633	-		NM_015231.1	GI:54859721	go_component: nucleus; go_component: nuclear pore; go_component: nuclear pore; go_function: protein binding; go_function: nucleocytoplasmic transporter activity; go_process: transport; go_process: mRNA-nucleus export	nucleoporin 160kDa	390	TRUE	11:47825921-47827061	-4.93816	-5.02071	-4.83656	-0.184152	0.203762	0.0551742	3.69307	0.000286529	0.00470955	-6.05582	-6.18753	-5.92411	-0.26342	0.00288559
cg23588553	SHMT2	12	55.91	6472	+	36.1	NCBI:RefSeq	CGTGCATGGAAAAGCCAAGAGAACCCCAGAGTTTGTGACTAGGAACTAAG	55909819	+	GLYA; SHMT;	NM_005412.4	GI:52851445	go_component: mitochondrion; go_function: transferase activity; go_function: glycine hydroxymethyltransferase activity; go_process: glycine metabolism; go_process: L-serine metabolism; go_process: one-carbon compound metabolism	serine hydroxymethyltransferase 2 (mitochondrial)	147	TRUE	12:55909529-55910298	-4.76153	-4.87303	-4.6243	-0.248735	0.244681	0.0881624	2.77534	0.00604287	0.0391238	-5.86406	-6.06462	-5.66351	-0.401118	0.00325598
cg05874450	POPDC3	6	105.734	64208	-	36.1	NCBI:RefSeq	AAAAGCCGTTCCTAGGGGCCCTTGTCAGTCCTGGGGAAGTCATGCCAGCG	105734563	-	POP3; MGC22671; bA355M14.1;	NM_022361.3	GI:34335275	go_component: membrane; go_component: integral to membrane; go_function: molecular function unknown; go_process: biological process unknown	popeye protein 3	624	TRUE	6:105733928-105734937	-5.45478	-5.57584	-5.30577	-0.270071	0.258826	0.0767916	3.3705	0.000902037	0.0106157	-4.97121	-5.09655	-4.84587	-0.250672	0.048539
cg20420254	SMPD1	11	6.36797	6609	+	36.1	NCBI:RefSeq	CGCGGATTCTGACAAAGGAGACGTCTTCCACCGACCACATCACATGGAGC	6368231	+	ASM; NPD;	NM_000543.3	GI:56117839	isoform 1 precursor is encoded by transcript variant 1; acid sphingomyelinase; go_component: lysosome; go_function: hydrolase activity; go_function: integrase activity; go_function: sphingomyelin phosphodiesterase activity; go_function: hydrolase activity; acting on glycosyl bonds; go_function: sphingomyelin phosphodiesterase activity; go_process: carbohydrate metabolism; go_process: signal trans…	sphingomyelin phosphodiesterase 1; acid lysosomal isoform 1 precursor	261	TRUE	11:6367826-6368621	-6.35444	-6.44347	-6.24487	-0.198605	0.256212	0.0751203	3.41069	0.00078535	0.00962182	-9.53167	-9.96659	-9.09674	-0.869851	0.022513
cg20227766	G1P3	1	27.8713	2537	-	36.1	NCBI:RefSeq	AATCTTCAGCCCGGAGCCTGCTGATAGATGGGCACAGCAGCGAGTAAACG	27871295	-	6-16; IFI616;	NM_022872.1	GI:13259547	isoform b is encoded by transcript variant 2; go_component: integral to membrane; go_process: immune response; go_process: response to pest; pathogen or parasite	interferon induced 6-16 protein isoform b	5	FALSE		-5.14076	-5.23193	-5.02855	-0.20338	0.21979	0.0798554	2.75235	0.00646675	0.0407536	-6.54139	-6.67105	-6.41173	-0.259316	0.0281083
cg00528052	JARID1B	1	201.044	10765	-	36.1	NCBI:RefSeq	CGCTTTCATCCACAAGATCCGGCCCATAGCCGAGCAGACTGGCATCTGTA	201044172	-	PUT1; PLU-1; RBBP2H1A;	NM_006618.3	GI:57242795	putative DNA/chromatin binding motif; retinoblastoma-binding protein 2; homolog 1A; RB-binding protein; go_component: nucleus; go_component: nucleus; go_function: DNA binding; go_function: DNA binding; go_function: protein binding; go_function: zinc ion binding; go_function: protein binding; go_function: transcriptional repressor activity; go_process: regulation of transcription; DNA-dependent; g…	Jumonji; AT rich interactive domain 1B (RBP2-like)	254	TRUE	1:201042549-201044511	-5.79222	-5.87708	-5.68777	-0.189308	0.21838	0.080348	2.71793	0.00715185	0.0437459	-5.95727	-6.24517	-5.66937	-0.5758	0.000125518
cg24341536	SQSTM1	5	179.18	8878	+	36.1	NCBI:RefSeq	CGGCCCTGGCACTCATACAGGCCTGGGCTCCAGCCTCTGCACCTGGGATC	179180503	+	p60; p62; PDB3; ZIP3;	NM_003900.3	GI:46251280	ubiquitin-binding protein p62; phosphotyrosine independent ligand for the Lck SH2 domain p62; Paget disease of bone 3; go_component: cytosol; go_component: cytosol; go_component: cytosol; go_function: zinc ion binding; go_function: metal ion binding; go_function: ubiquitin binding; go_function: SH2 domain binding; go_function: ubiquitin binding; go_function: SH2 domain binding; go_function: prote…	sequestosome 1	234	TRUE	5:179180219-179181490	-4.24656	-4.30679	-4.17243	-0.134351	0.14777	0.0504548	2.92876	0.00380217	0.0287149	-4.95522	-5.01046	-4.89999	-0.110468	0.00211152
cg23733753	CYP46A1	14	99.2208	10858	+	36.1	NCBI:RefSeq	CTAACTATTCTTAGTAACAAATTACTCACAGCCGCAGCAGCTGCTGGGCG	99220508	+	CP46; CYP46;	NM_006668.1	GI:5729795	cholesterol 24-hydroxylase; cytochrome P450; subfamily 46 (cholesterol 24-hydroxylase); go_component: membrane; go_component: microsome; go_component: integral to membrane; go_component: endoplasmic reticulum; go_function: heme binding; go_function: iron ion binding; go_function: metal ion binding; go_function: steroid hydroxylase activity; go_process: lipid metabolism; go_process: electron trans…	cytochrome P450; family 46	308	TRUE	14:99219344-99221023	-5.20867	-5.29724	-5.09967	-0.197568	0.188498	0.0697609	2.70206	0.00748918	0.0449941	-5.31076	-5.55413	-5.06738	-0.486753	9.20364e-07
cg07699440	FAH	15	78.2324	2184	+	36.1	NCBI:RefSeq	CGCCACCTTAGGCCCGCAGCCGTGCCGGGTGCTCTTCAGCATGTCCTTCA	78232396	+		NM_000137.1	GI:4557586	fumarylacetoacetase; go_function: hydrolase activity; go_function: calcium ion binding; go_function: magnesium ion binding; go_function: fumarylacetoacetase activity; go_process: metabolism; go_process: tyrosine catabolism; go_process: L-phenylalanine catabolism; go_process: aromatic amino acid family metabolism	fumarylacetoacetate hydrolase (fumarylacetoacetase)	16	TRUE	15:78231988-78232886	-6.14281	-6.22579	-6.04067	-0.185129	0.205227	0.0695014	2.95284	0.00352945	0.0271532	-6.12137	-6.27215	-5.9706	-0.301549	7.92465e-05
cg19815904	SEMA3C	7	80.3862	10512	-	36.1	NCBI:RefSeq	AAATTCTTTCTTCCCGGTCCTCTGAGTTTCTTTGTAAAGGAATCTCAGCG	80386603	-	SemE; SEMAE;	NM_006379.2	GI:32307182	semaphorin E; go_process: development; go_process: immune response; go_process: response to drug; go_process: transmembrane receptor protein tyrosine kinase signaling pathway	semaphorin 3C	360	TRUE	7:80386071-80386790	-3.52371	-3.57931	-3.45527	-0.124038	0.175108	0.046141	3.79507	0.00019611	0.00356163	-3.0569	-3.31284	-2.80095	-0.511897	0.00120728
cg17918089	SETDB1	1	149.166	9869	+	36.1	NCBI:RefSeq	AATAAAACGTGGGTACCTAATATCCACAATCCAAATACTTCACACATTCG	149165512	+	ESET; KG1T; KIAA0067;	NM_012432.2	GI:41281392	ERG-associated protein with a SET domain; ESET; go_component: nucleus; go_function: DNA binding; go_function: zinc ion binding; go_function: protein binding; go_function: transferase activity; go_function: methyltransferase activity; go_function: histone-lysine N-methyltransferase activity; go_process: chromatin modification	SET domain; bifurcated 1	363	TRUE	1:149165152-149165920	-5.4732	-5.58272	-5.33841	-0.244313	0.259098	0.0694183	3.73242	0.00024777	0.00421373	-6.27422	-6.40523	-6.14321	-0.262021	0.0053507
cg07034269	UGCGL1	2	128.565	56886	+	36.1	NCBI:RefSeq	AAGGTTCGTTGGGCCAACAGCTGAGACCCGAAAGCTTCAACAGTCAGTCG	128565255	+	HUGT1;	NM_001025777.1	GI:71061440	isoform 2 is encoded by transcript variant 2; UDP-glucose:glycoprotein glucosyltransferase 1; go_component: endoplasmic reticulum; go_component: ER-Golgi intermediate compartment; go_function: catalytic activity; go_function: unfolded protein binding; go_function: transferase activity; transferring glycosyl groups; go_function: UDP-glucose:glycoprotein glucosyltransferase activity; go_function: U…	UDP-glucose ceramide glucosyltransferase-like 1 isoform 2	257	TRUE	2:128564958-128565844	-4.17253	-4.23906	-4.09065	-0.148405	0.142551	0.0524777	2.71641	0.00718352	0.0438095	-4.74682	-4.81756	-4.67609	-0.141469	0.00310868
cg03486540	ZNF224	19	49.2902	7767	+	36.1	NCBI:RefSeq	CCTTTGAGTGTAATGCTGCAGGAGTACAGTCCAGACCCTCAGTGGAATCG	49290337	+	BMZF2; BMZF-2; ZNF255;	NM_013398.1	GI:7019590	zinc finger 2; bone marrow; zinc finger protein 255; ZNF224 [amino acids 1-78]; Homo sapiens zinc finger protein 224; Zinc finger protein ZNF255; go_component: nucleus; go_function: DNA binding; go_function: zinc ion binding; go_function: metal ion binding; go_process: transcription; go_process: regulation of transcription; DNA-dependent	zinc finger protein 224	122	TRUE	19:49289933-49291256	-5.03175	-5.19157	-4.83504	-0.356525	0.333307	0.111031	3.00192	0.00302836	0.0244011	-8.4795	-8.90422	-8.05477	-0.849451	0.0180511
cg20361540	VPS37B	12	121.946	79720	-	36.1	NCBI:RefSeq	GAGCCGAGCTGGGCTTAAGGCGGCGGCTGTGAGGCCTCGAGCGGGGTTCG	121946665	-	FLJ12750;	NM_024667.1	GI:13375925	synonym: FLJ12750	vacuolar protein sorting 37B	265	TRUE	12:121945921-121947044	-5.60287	-5.76438	-5.4041	-0.360275	0.369518	0.134266	2.75213	0.006471	0.0407554	-8.81794	-9.46096	-8.17491	-1.28605	0.0126558
cg24341800	ACAT1	11	107.497	38	+	36.1	NCBI:RefSeq	AAGGACGTGGATGGAGACACTGGCGCTGGGGTCAACGAGCACCTGACACG	107497468	+	T2; MAT; ACAT; THIL;	NM_000019.2	GI:31563501	acetoacetyl Coenzyme A thiolase; go_component: mitochondrion; go_function: transferase activity; go_function: acyltransferase activity; go_function: acetyl-CoA C-acetyltransferase activity	acetyl-Coenzyme A acetyltransferase 1 precursor	182	TRUE	11:107497148-107498092	-1.30064	-1.33038	-1.26404	-0.0663384	0.115704	0.0442866	2.61263	0.00967409	0.0531726	-1.75808	-1.85712	-1.65903	-0.198091	1.6115e-05
cg04473302	SLC26A4	7	107.088	5172	+	36.1	NCBI:RefSeq	TGTGTGTCTTTCCCTTCGACCAAGGTGTCTGTTGCTCCGTAAATAAAACG	107088316	+	PDS; DFNB4;	NM_000441.1	GI:4505696	go_component: membrane; go_component: integral to membrane; go_function: transporter activity; go_function: sulfate porter activity; go_function: iodide transporter activity; go_function: chloride transporter activity; go_process: transport; go_process: sulfate transport; go_process: sensory perception of sound; go_process: sensory perception of sound	pendrin	137	TRUE	7:107088228-107089784	-5.16765	-5.29227	-5.01428	-0.277988	0.28958	0.104491	2.77133	0.00611489	0.039392	-7.21797	-7.41932	-7.01662	-0.402698	0.00852256
cg20684399	PHF2	9	95.3781	5253	+	36.1	NCBI:RefSeq	GGGCCAAGTATTTGCTTGTCGGCCTTCTAGACTAGGAAGGCTCTCCTGCG	95378851	+	GRC5; KIAA0662;	NM_024517.1	GI:24797090	isoform b is encoded by transcript variant 2; go_component: nucleus; go_function: protein binding; go_function: zinc ion binding; go_function: metal ion binding; go_function: transcription factor activity; go_process: regulation of transcription; DNA-dependent	PHD finger protein 2 isoform b	722	TRUE	9:95377857-95379808	-5.28949	-5.38206	-5.17557	-0.206485	0.184696	0.042178	4.37896	1.93026e-05	0.000621152	-4.82906	-5.0071	-4.65101	-0.356091	4.95356e-07
cg16718678	NRXN2	11	64.2472	9379	-	36.1	NCBI:RefSeq	TGATGCTGCCGTCAGTCGGTGTTGCAGGGATGCGGCGGCGGGAGCAGCCG	64247236	-	KIAA0921;	NM_015080.2	GI:21166378	isoform alpha-1 precursor is encoded by transcript variant alpha-1; neurexin II; go_component: integral to membrane; go_function: protein binding; go_process: cell adhesion	neurexin 2 isoform alpha-1 precursor	27	TRUE	11:64246745-64247792	-4.91191	-5.16075	-4.60565	-0.555103	0.520539	0.122843	4.23742	3.4638e-05	0.000990791	-4.61363	-4.83247	-4.3948	-0.437666	2.55513e-05
cg25827112	TESK2	1	45.7294	10420	-	36.1	NCBI:RefSeq	GGAGCTCAGCAGAGCTACCAGCTGCCCTGTTGGCTTCGCTGGTCGGATCG	45729420	-		NM_007170.1	GI:6005895	go_component: nucleus; go_function: ATP binding; go_function: nucleotide binding; go_function: transferase activity; go_function: magnesium ion binding; go_function: manganese ion binding; go_function: protein-tyrosine kinase activity; go_function: protein serine/threonine kinase activity; go_process: apoptosis; go_process: spermatogenesis; go_process: focal adhesion formation; go_process: intrac…	testis-specific protein kinase 2	60	TRUE	1:45728516-45729824	-5.59894	-5.677	-5.50286	-0.174137	0.195987	0.074211	2.64094	0.00892745	0.0504696	-6.24454	-6.31112	-6.17796	-0.13316	0.0336494
cg19051578	DEPDC1B	5	60.0321	55789	-	36.1	NCBI:RefSeq	CGGCCCAAAGCTGGGTTTCGGTCGCTGGATAACACCTATTATTGACCCTT	60031713	-	XTP1; FLJ11252;	NM_018369.1	GI:23510330	HBxAg transactivated protein 1; go_process: intracellular signaling cascade	DEP domain containing 1B	372	TRUE	5:60031020-60032317	-5.78686	-5.89271	-5.65659	-0.236116	0.210764	0.0701611	3.004	0.00300858	0.0243274	-6.2592	-6.32324	-6.19517	-0.128074	0.0315555
cg25234963	SFRS14	19	19.0048	10147	-	36.1	NCBI:RefSeq	CGGAAGCACAGAAAGCTTAGAATCGTGTGATTTGAACCTGGGTCACCTGA	19005368	-		NM_014884.1	GI:38490530	arginine/serine-rich 14 splicing factor; go_component: nucleus; go_function: RNA binding; go_process: nuclear mRNA splicing; via spliceosome	splicing factor; arginine/serine-rich 14	522	TRUE	19:19004572-19006013	-5.12981	-5.20953	-5.03171	-0.17782	0.164974	0.0535844	3.07877	0.00237347	0.0206601	-5.31689	-5.3926	-5.24118	-0.151424	0.00159375
cg09870606	GLG1	16	73.1989	2734	-	36.1	NCBI:RefSeq	CTTTGCACAACCAGGTGTATTACGGAATCGGAAAGCCTCTCCTTGTATCG	73198518	-	CFR-1; ESL-1; MG160; MG-160; FLJ23967;	NM_012201.4	GI:55742888	cysteine-rich fibroblast growth factor receptor; go_component: membrane; go_component: Golgi stack; go_component: Golgi membrane; go_component: integral to membrane; go_function: receptor binding; go_function: fibroblast growth factor binding	golgi apparatus protein 1	402	FALSE		-4.96831	-5.09426	-4.81329	-0.280973	0.281482	0.105261	2.67415	0.00811784	0.0473886	-5.2548	-5.39084	-5.11876	-0.272076	0.0291489
cg23700778	KIAA0895	7	36.3732	23366	-	36.1	NCBI:RefSeq	CCAGTAGCTACGGGCTGGTGGAAGCGCTGCTCACAGTCAGTGTCGGTACG	36373289	-		NM_015314.1	GI:57863779		hypothetical protein LOC23366	49	TRUE	7:36372746-36373800	-5.98632	-6.09627	-5.851	-0.245268	0.31216	0.0922384	3.38427	0.000860328	0.0102537	-7.18393	-7.39684	-6.97101	-0.425822	0.00197406
cg22182110	GOLGB1	3	122.951	2804	-	36.1	NCBI:RefSeq	CGGCAGGACGTTACCAGGGAGACCAGGCACACCTTGTTTGTTACCAACCT	122951292	-	GCP; GCP372; GIANTIN;	NM_004487.1	GI:4758453	Human mRNA for golgi antigen gcp372; complete cds; go_component: nucleus; go_component: membrane; go_component: Golgi stack; go_component: Golgi membrane; go_component: integral to membrane; go_component: ER-Golgi intermediate compartment; go_function: DNA binding; go_function: protein binding; go_process: Golgi organization and biogenesis; go_process: regulation of transcription; DNA-dependent	golgi autoantigen; golgin subfamily b; macrogolgin (with transmembrane signal); 1	43	TRUE	3:122950596-122951787	-4.30263	-4.38645	-4.19948	-0.18697	0.235053	0.0494052	4.75766	3.76921e-06	0.000183082	-4.18027	-4.28017	-4.08037	-0.199798	0.00420484
cg06864275	KIAA0963	19	1.12515	22904	-	36.1	NCBI:RefSeq	AAGCGGGGTCGGGCCAGGCAGGGGTCGCGGTGGAGCCGGGGCGGGGGTCG	1125259	-	FLJ00173;	NM_014963.1	GI:7662409	Putative human homolog of Drosophila Sno protein	KIAA0963	105	TRUE	19:1124197-1125873	-5.98586	-6.1143	-5.82777	-0.286533	0.315549	0.0903424	3.49281	0.000589477	0.00787818	-6.6574	-6.77347	-6.54133	-0.23214	0.0289381
cg21685266	EHHADH	3	186.454	1962	-	36.1	NCBI:RefSeq	CGGTTTAAACCGAGAAGGACACTCAAGAGTTGAGCAACTGGTACATGCCA	186454531	-	LBP; ECHD; LBFP; PBFE;	NM_001966.2	GI:68989262	L-bifunctional protein; peroxisomal; 3;2-trans-enoyl-CoA isomerase; go_component: peroxisome; go_function: lyase activity; go_function: isomerase activity; go_function: oxidoreductase activity; go_function: enoyl-CoA hydratase activity; go_function: dodecenoyl-CoA delta-isomerase activity; go_function: 3-hydroxyacyl-CoA dehydrogenase activity; go_process: metabolism; go_process: lipid metabolism;…	enoyl-Coenzyme A; hydratase/3-hydroxyacyl Coenzyme A dehydrogenase	185	TRUE	3:186454240-186454829	-3.12253	-3.20608	-3.0197	-0.18638	0.153757	0.0525882	2.9238	0.0038608	0.0289666	-2.63388	-2.76538	-2.50238	-0.262996	0.000557016
cg01765473	ATAD1	10	89.5681	84896	-	36.1	NCBI:RefSeq	CGCCGGCTTCGCAGAAAGTCTCAGTCTAGCAGGTAGCTTAAGCAGACATC	89567897	-	AFDC1; FNP001; FLJ14600;	NM_032810.2	GI:31377643	go_function: ATP binding; go_function: nucleotide binding; go_function: nucleoside-triphosphatase activity	ATPase family; AAA domain containing 1	251	TRUE	10:89567349-89568720	-6.02445	-6.14059	-5.88151	-0.259085	0.282611	0.0878067	3.21856	0.0015055	0.0151989	-8.00671	-8.13205	-7.88138	-0.250669	0.029789
cg25349574	CAMTA2	17	4.83202	23125	-	36.1	NCBI:RefSeq	CGCCTCGGACAAGACTCCTTGTCTGGGGACCCAGCCCGACTTCATTGTAG	4831655	-	KIAA0909;	NM_015099.2	GI:29826340	go_component: cytoskeleton; go_function: calmodulin binding; go_process: Wnt receptor signaling pathway	calmodulin binding transcription activator 2	360	TRUE	17:4831032-4832176	-5.30005	-5.37732	-5.20496	-0.17236	0.209761	0.080499	2.60576	0.00986358	0.0539407	-6.64039	-6.73858	-6.54221	-0.196369	0.00796565
cg25555137	BCR	22	21.8527	613	+	36.1	NCBI:RefSeq	CGCTAAGCTCAGCCAGCCGGCTCTCGCCGCACTCCCGCCCGGCCCGCACT	21852552	+	ALL; CML; PHL; BCR1; D22S11; D22S662;	NM_004327.2	GI:11038638	isoform 1 is encoded by transcript variant 1; breakpoint cluster region protein; go_component: cellular component unknown; go_function: kinase activity; go_function: transferase activity; go_function: GTPase activator activity; go_function: GTPase activator activity; go_function: protein serine/threonine kinase activity; go_function: guanyl-nucleotide exchange factor activity; go_function: protei…	breakpoint cluster region isoform 1	196	TRUE	22:21852088-21854639	-5.75281	-5.92183	-5.5448	-0.377029	0.461237	0.101305	4.55297	9.22597e-06	0.000361922	-8.03446	-8.11689	-7.95202	-0.164872	0.0400993
cg08607500	CBWD1	9	0.168786	55871	-	36.1	NCBI:RefSeq	CGCCATTTTGTGACTGGGATGGTTAGTTACCTAAATACCCGGTGATAATT	169032	-		NM_018491.2	GI:13236498	COBW-like protein	COBW domain containing 1	246	TRUE	9:168264-169328	-4.40331	-4.5527	-4.21945	-0.333255	0.320544	0.0772464	4.14963	4.94239e-05	0.00128036	-6.18672	-6.29362	-6.07982	-0.213792	0.0547164
cg24121001	TTC16	9	129.518	158248	+	36.1	NCBI:RefSeq	CGGCCCTGGCCCTGACGTTGCTAGGCACCATCACCAGGACGCCCACAGGC	129518179	+	FLJ32780; RP11-56D16.6;	NM_144965.1	GI:21450644	go_function: binding	tetratricopeptide repeat domain 16	20	TRUE	9:129516898-129518292	-2.48058	-2.58317	-2.35432	-0.228851	0.253928	0.0733181	3.46338	0.000653706	0.00849405	-3.02129	-3.17515	-2.86744	-0.307708	2.79428e-07
cg15128849	HHLA3	1	70.5933	11147	+	36.1	NCBI:RefSeq	CGCAGGATGTGATGTCACCGAGATGCAGAGGATACTCAGTCAACCAACAT	70593100	+		NM_007071.1	GI:5901965	isoform 2 is encoded by transcript variant 2	HERV-H LTR-associating 3 isoform 2	206	TRUE	1:70592084-70593459	-4.59971	-4.69483	-4.48264	-0.212194	0.229686	0.0847836	2.70908	0.00733826	0.0443721	-5.84693	-5.97836	-5.7155	-0.262862	0.00245929
cg20216935	TGFBR2	3	30.6234	7048	+	36.1	NCBI:RefSeq	CGGCCACAGGCCCCTGAGCAGCCCCCGACCCATGGCAGACCCCGCTGCTC	30622998	+	AAT3; MFS2; RIIC; HNPCC6; TGFR-2; TGFbeta-RII;	NM_003242.4	GI:67782323	isoform B precursor is encoded by transcript variant 2; transforming growth factor; beta receptor II (70-80kD); TGF-beta type II receptor; transforming growth factor beta receptor type IIC; TGF-beta receptor type IIB; go_component: membrane; go_component: integral to membrane; go_function: ATP binding; go_function: receptor activity; go_function: nucleotide binding; go_function: protein binding; …	TGF-beta type II receptor isoform B precursor	413	TRUE	3:30622728-30624113	-5.55292	-5.68887	-5.3856	-0.303266	0.298586	0.0685943	4.35293	2.15171e-05	0.000676557	-5.81025	-5.96531	-5.65519	-0.310116	8.71704e-05
cg06973760	NFATC1	18	75.2559	4772	+	36.1	NCBI:RefSeq	ATTGCACGACACCCTTATGTGATTTAAACTAAACCCAAAGGCTAAACTCG	75256760	+	NFAT2; NFATc; NF-ATC;	NM_006162.3	GI:27502384	isoform B is encoded by transcript variant 2; NFAT transcription complex cytosolic component; go_component: nucleus; go_component: cytoplasm; go_function: FK506 binding; go_function: transcription factor activity; go_function: transcription factor activity; go_function: transcription factor activity; go_process: regulation of transcription; DNA-dependent; go_process: transcription from RNA polyme…	nuclear factor of activated T-cells; cytosolic component 1 isoform B	903	TRUE	18:75254093-75258104	-5.13573	-5.22743	-5.02287	-0.204565	0.216603	0.0674602	3.21082	0.00154454	0.0154267	-5.18393	-5.34829	-5.01957	-0.328724	0.00688909
cg18347238	VPS4A	16	67.9035	27183	+	36.1	NCBI:RefSeq	GCGACCCTTCATTCATTCCCTAGATCCTGCAGGGTGGTGCTGGGATGGCG	67902788	+	SKD1; SKD2; VPS4; VPS4-1; FLJ22197;	NM_013245.2	GI:17865806	vacuolar protein sorting 4A (yeast homolog); SKD1-homolog; vacuolar sorting protein 4; go_component: vacuole; go_component: membrane; go_component: perinuclear region; go_function: ATP binding; go_function: nucleotide binding; go_function: protein binding; go_function: protein binding; go_function: nucleoside-triphosphatase activity; go_process: protein transport; go_process: vesicle-mediated tra…	vacuolar protein sorting factor 4A	664	TRUE	16:67902051-67903484	-5.28721	-5.36029	-5.19726	-0.163026	0.166346	0.0494738	3.3623	0.000927744	0.0107949	-5.26945	-5.39056	-5.14833	-0.242226	0.00243611
cg03786772	C6orf166	6	88.4691	55122	-	36.1	NCBI:RefSeq	CATTATCTCCTATCCTCTCCATGTGAAAGGTCTTGTTTTGGGTACTGTCG	88468645	-	FLJ10342; dJ486L4.2;	NM_018064.2	GI:39725640	synonyms: FLJ10342; dJ486L4.2	hypothetical protein LOC55122	474	FALSE		-4.96546	-5.10217	-4.79721	-0.304967	0.29462	0.103726	2.84038	0.00497687	0.0341776	-6.86003	-7.24582	-6.47423	-0.771596	0.00148769
cg15210596	SCCPDH	1	244.954	51097	+	36.1	NCBI:RefSeq	TCTAGCCCTGCTGGAAGCTGGAGGCGGCAGCCGGTTGTCCTTGTTGCACG	244954001	+	CGI-49; FLJ43187; RP11-439E19.2;	NM_016002.2	GI:55770835	go_function: oxidoreductase activity; go_function: saccharopine dehydrogenase (NAD+; L-glutamate-forming) activity	saccharopine dehydrogenase (putative)	53	TRUE	1:244953572-244954933	-5.16199	-5.27489	-5.02304	-0.251852	0.263162	0.0892846	2.94745	0.00358889	0.0274975	-5.9226	-6.01735	-5.82784	-0.189507	0.0208766
cg21226224	SOX17	8	55.5327	64321	+	36.1	NCBI:RefSeq	CGCTCGGTATGTTCATCTAAACGACCTTGGGCAAGTACGTCGATTCCAAG	55533048	+	FLJ22252;	NM_022454.2	GI:31077196	SRY-related HMG-box transcription factor SOX17; go_component: nucleus; go_function: DNA binding; go_process: transcription; go_process: regulation of transcription; DNA-dependent	SRY-box 17	324	TRUE	8:55532627-55535230	-2.54963	-2.64087	-2.43735	-0.203523	0.17823	0.0573302	3.10883	0.00215494	0.0192877	-0.556337	-0.863656	-0.249018	-0.614638	0.0139333
cg07265622	MED31	17	6.49558	51003	-	36.1	NCBI:RefSeq	CGAAGACACCAAAACGCCACCAGCCTGACAGAGCAAAAGCCCAGAGACGC	6495650	-	CGI-125; 3110004H13Rik;	NM_016060.1	GI:7705591	go_component: nucleus; go_component: mediator complex; go_function: protein binding; go_function: RNA polymerase II transcription mediator activity; go_process: regulation of transcription; DNA-dependent	mediator of RNA polymerase II transcription; subunit 31 homolog	71	TRUE	17:6495438-6496453	-3.85576	-3.94941	-3.7405	-0.208907	0.194808	0.0494674	3.93811	0.000113733	0.00238043	-3.81016	-3.96155	-3.65877	-0.302787	1.29172e-05
cg19161333	EIF3S12	19	43.8022	27335	+	36.1	NCBI:RefSeq	GCCTGTGGTTCCCAGCATTGCCTAGCACTGACAGTTTATTTCAGTAAACG	43801577	+	M9; eIF3k; ARG134; PTD001; HSPC029; MSTP001; PLAC-24; PRO1474;	NM_013234.1	GI:10801344	muscle specific gene; eukaryotic translation initiation factor 3 subunit k; go_component: nucleus; go_function: translation initiation factor activity; go_process: protein biosynthesis; go_process: translational initiation	eukaryotic translation initiation factor 3; subunit 12	660	FALSE		-4.36198	-4.44116	-4.26452	-0.176645	0.203721	0.0640825	3.17904	0.00171495	0.0166053	-6.2796	-6.42933	-6.12988	-0.299457	0.00648519
cg07789552	STK40	1	36.6238	83931	-	36.1	NCBI:RefSeq	CGGGGCCATTTCTGCTGCACTCAGATGGCTTCAGGCTGTCACTCCGATTC	36624072	-	SHIK; SgK495; MGC4796; RP11-268J15.4;	NM_032017.1	GI:31543197	Ser/Thr-like kinase; 2310004N11Rik; go_function: ATP binding; go_function: nucleotide binding; go_function: protein kinase activity; go_function: protein-tyrosine kinase activity; go_function: protein serine/threonine kinase activity; go_process: protein amino acid phosphorylation	SINK-homologous serine/threonine kinase	290	TRUE	1:36623227-36624594	-3.78707	-3.88014	-3.67253	-0.207615	0.201704	0.0431115	4.67867	5.34246e-06	0.000241289	-4.06703	-4.15066	-3.9834	-0.167259	5.38589e-05
cg02742971	OSR1	2	19.4215	130497	-	36.1	NCBI:RefSeq	GAACAAGGTAATTGCAGTCCTGGGCGCCTGGGCTCAGCAAAGCGAATGCG	19421853	-	ODD;	NM_145260.2	GI:75677369	odd-skipped homolog; go_component: nucleus; go_function: zinc ion binding; go_function: metal ion binding; go_function: nucleic acid binding	odd-skipped related 1	313	TRUE	2:19420844-19422387	-5.18692	-5.32541	-5.01648	-0.308929	0.312801	0.0837896	3.73317	0.000247085	0.00420554	-4.53547	-4.74597	-4.32497	-0.421003	0.0384626
cg15864184	PTPN1	20	48.5603	5770	+	36.1	NCBI:RefSeq	CGCCCCTGAAGCAGAAGGACCAATCAGCGATCGAGAATTTCGACAAGCAC	48560298	+	PTP1B;	NM_002827.2	GI:18104977	non-receptor tyrosine phosphatase 1; protein tyrosine phosphatase 1B; protein tyrosine phosphatase; placental; go_component: soluble fraction; go_component: endoplasmic reticulum; go_function: hydrolase activity; go_function: protein tyrosine phosphatase activity; go_process: signal transduction; go_process: protein amino acid dephosphorylation	protein tyrosine phosphatase; non-receptor type 1	17	TRUE	20:48559926-48560942	-2.64587	-2.7202	-2.55438	-0.165826	0.170178	0.0357774	4.75659	3.78721e-06	0.000183524	-2.16707	-2.2221	-2.11204	-0.110061	3.08972e-06
cg15309066	CYCS	7	25.1315	54205	-	36.1	NCBI:RefSeq	CGTCGCCGCACCTCATTGGCTCCAGTCCCAATGCCTGCGCCAAGGACCTG	25131480	-	CYC; HCS;	NM_018947.4	GI:34328939	go_component: cytosol; go_component: cytosol; go_component: mitochondrion; go_component: mitochondrial intermembrane space; go_component: mitochondrial intermembrane space; go_component: mitochondrial electron transport chain; go_function: heme binding; go_function: iron ion binding; go_function: metal ion binding; go_function: protein binding; go_function: electron transporter; transferring elec…	cytochrome c	33	TRUE	7:25130754-25132019	-5.50854	-5.60744	-5.38681	-0.220634	0.226649	0.0814239	2.78357	0.00589737	0.0384721	-7.38201	-7.52017	-7.24384	-0.276331	0.0406578
cg26982998	MBD3	19	1.54316	53615	-	36.1	NCBI:RefSeq	CGCCCCAAGAAGGCACCCCCTGCGTCTCACGGGAACCAAAGGGACAGCCC	1543652	-		NM_003926.5	GI:21464122	go_component: nucleus; go_function: DNA binding; go_function: protein binding; go_process: transcription; go_process: regulation of transcription; DNA-dependent	methyl-CpG binding domain protein 3	494	TRUE	19:1542325-1544591	-5.56457	-5.76058	-5.32332	-0.437257	0.423052	0.11765	3.59587	0.000408229	0.00602686	-7.3748	-7.67862	-7.07097	-0.607649	0.0456769
cg19649173	ZNF446	19	63.6797	55663	+	36.1	NCBI:RefSeq	TCGAGGGATGGCCACAGCATCCCGGCCCTGAAGGTCTGCAGTGAAAGACG	63679607	+	ZSCAN30; FLJ20626;	NM_017908.1	GI:8923581	go_component: nucleus; go_function: zinc ion binding; go_function: metal ion binding; go_function: nucleic acid binding; go_function: transcription factor activity; go_process: transcription; go_process: regulation of transcription; DNA-dependent	zinc finger protein 446	82	TRUE	19:63678517-63680033	-4.78011	-4.89311	-4.64104	-0.252064	0.263579	0.100472	2.6234	0.00938359	0.0521606	-7.05977	-7.33415	-6.78539	-0.548752	0.00688909
cg22336633	RPS13	11	17.0563	6207	-	36.1	NCBI:RefSeq	ACAATAGCATGTGATGAGGACCACACGGGAAGCCATGGCAGCGGCTACCG	17055796	-		NM_001017.2	GI:14591910	40S ribosomal protein S13; go_component: ribosome; go_function: protein binding; go_function: structural constituent of ribosome; go_process: protein biosynthesis	ribosomal protein S13	468	TRUE	11:17055245-17057754	-5.41779	-5.58384	-5.21342	-0.370423	0.368026	0.0957787	3.84247	0.000163997	0.00310719	-5.76806	-5.82499	-5.71112	-0.113869	0.0406578
cg01333131	CDC42BPB	14	102.594	9578	-	36.1	NCBI:RefSeq	CGCTGGCTCCCGCCTTGGCAGCATCCCCCAGAAGCCTGGGCCCTGACCCC	102593552	-	MRCKB; KIAA1124;	NM_006035.2	GI:16357473	CDC42-binding protein kinase beta (DMPK-like); MRCK beta; go_component: cytoskeleton; go_function: ATP binding; go_function: metal ion binding; go_function: nucleotide binding; go_function: transferase activity; go_function: diacylglycerol binding; go_function: small GTPase regulator activity; go_function: protein serine/threonine kinase activity; go_process: intracellular signaling cascade; go_p…	CDC42-binding protein kinase beta	785	TRUE	14:102592536-102594380	-3.42479	-3.51763	-3.31053	-0.207105	0.20863	0.0796671	2.61878	0.00950739	0.0526357	-3.1351	-3.32041	-2.94978	-0.370634	0.00559152
cg07355551	ZNF343	20	2.43729	79175	-	36.1	NCBI:RefSeq	AATAATCCCGCCTGGTTCAAGACAGGCATTAGAGTTCTAGGTCACTCTCG	2437778	-	FLJ39592; MGC10715; MGC20504; dJ734P14.5;	NM_024325.4	GI:31563520	go_component: nucleus; go_component: intracellular; go_function: zinc ion binding; go_function: nucleic acid binding; go_process: regulation of transcription; DNA-dependent	zinc finger protein 343	493	TRUE	20:2436998-2438435	-4.37872	-4.45434	-4.28565	-0.168695	0.175919	0.0417915	4.20943	3.88183e-05	0.0010688	-4.17687	-4.36256	-3.99119	-0.371366	3.90967e-06
cg22502502	TRIM38	6	26.0705	10475	+	36.1	NCBI:RefSeq	CGGGACAGAGAAGAATAGAAAGCTGACTCAGATGAATTTTGTGATGCCAA	26071050	+	RNF15; RORET; MGC8946;	NM_006355.2	GI:24497622	Ro/SSA ribonucleoprotein homolog; ring finger protein 15; zinc-finger protein RoRet; go_component: ubiquitin ligase complex; go_function: zinc ion binding; go_function: metal ion binding; go_function: signal transducer activity; go_function: ubiquitin-protein ligase activity; go_process: protein ubiquitination; go_process: positive regulation of I-kappaB kinase/NF-kappaB cascade	tripartite motif-containing 38	504	FALSE		-4.23575	-4.31853	-4.13388	-0.18465	0.223804	0.0649312	3.44678	0.000692756	0.00882878	-6.16433	-6.37062	-5.95804	-0.412578	0.0144983
cg10878896	CS	12	54.9807	1431	-	36.1	NCBI:RefSeq	CGCTCCAGGACTCGACCTCTGAAGGTCCTTGGAGCCAATTCCGTAATATG	54980442	-		NM_004077.2	GI:38327624	precursor; isoform a is encoded by transcript variant 1; citrate synthase; mitochondrial; go_component: cytoplasm; go_component: mitochondrion; go_function: transferase activity; go_function: citrate (Si)-synthase activity; go_function: citrate (Si)-synthase activity; go_process: tricarboxylic acid cycle	citrate synthase precursor; isoform a	274	TRUE	12:54979803-54980765	-3.20681	-3.29094	-3.10327	-0.187672	0.16785	0.0583562	2.87629	0.00446449	0.0318704	-6.3106	-6.49023	-6.13098	-0.359247	0.00189925
cg08035942	ZADH2	18	71.0503	284273	-	36.1	NCBI:RefSeq	TTGTTTTGGTTTGAATCTGCTCGGCGCAGACTGGCCAAGGATCCTCTCCG	71050105	-	MGC45594;	NM_175907.3	GI:51036599	go_function: zinc ion binding; go_function: oxidoreductase activity	zinc binding alcohol dehydrogenase; domain containing 2	220	TRUE	18:71048769-71050885	-4.68979	-4.75018	-4.61547	-0.134706	0.133724	0.0508962	2.62738	0.00927833	0.0517711	-4.9325	-4.99019	-4.87481	-0.115379	0.0459877
cg17503456	FOXL2	3	140.149	668	-	36.1	NCBI:RefSeq	CGGGCGAGTTCATCTCCAAGTCACTTTTTGTAAACGCCCCGCACAGCCTG	140148491	-	BPES; PFRK; POF3; BPES1; PINTO;	NM_023067.2	GI:42716284	Blepharophimosis; epicanthus inversus; and ptosis 1; blepharophimosis; epicanthus inversus and ptosis; forkhead transcription factor FOXL2; go_component: nucleus; go_function: transcription factor activity; go_process: transcription; go_process: regulation of transcription; DNA-dependent	forkhead box L2	253	TRUE	3:140146281-140149275	-4.41188	-4.50988	-4.29127	-0.218606	0.254901	0.0821694	3.10214	0.00220188	0.0195718	-4.70344	-4.78974	-4.61714	-0.172597	0.0478903
cg08552254	JMJD2A	1	43.8886	9682	+	36.1	NCBI:RefSeq	CGGTCACTGCTACAGCGGCAATGATCCTCGAGAATTCCAAAACCCTATAG	43888425	+	JMJD2; KIAA0677;	NM_014663.1	GI:7662245	go_function: protein binding; go_function: zinc ion binding; go_function: metal ion binding; go_function: nucleic acid binding; go_process: regulation of transcription; DNA-dependent	jumonji domain containing 2A	141	TRUE	1:43887375-43889052	-3.01535	-3.1297	-2.87461	-0.255091	0.281677	0.0763015	3.69164	0.000288045	0.00471941	-4.10779	-4.28341	-3.93217	-0.351233	0.0134954
cg08775774	CCDC62	12	121.825	84660	+	36.1	NCBI:RefSeq	TTCATTCTCTGGGTAGTGGTGAACAGCCGGTTCTTTCAGGCCTTCCAGCG	121825026	+	aaa; TSP-NY; FLJ40344;	NM_032573.3	GI:41393543	isoform a is encoded by transcript variant 1; testis-specific protein TSP-NY	testis-specific protein TSP-NY isoform a	176	TRUE	12:121824582-121825723	-3.87847	-3.93605	-3.8076	-0.128448	0.148979	0.0557593	2.67183	0.00817222	0.0475981	-4.02154	-4.12049	-3.92259	-0.197898	6.38767e-06
cg13741249	ZNF524	19	60.8039	147807	+	36.1	NCBI:RefSeq	CGGTTCGCTCCCACGGGGTAGCCTAGTCTAGGAGTCTGGTCTTTGGAACG	60803542	+	MGC23143;	NM_153219.2	GI:44921601	go_component: nucleus; go_function: zinc ion binding; go_function: metal ion binding; go_function: nucleic acid binding	zinc finger protein 524	358	TRUE	19:60802430-60804019	-5.47007	-5.54573	-5.37694	-0.168799	0.175611	0.0558246	3.14576	0.00191196	0.0179148	-5.12086	-5.28422	-4.95751	-0.32671	4.46157e-07
cg20051033	CPNE9	3	9.72106	151835	+	36.1	NCBI:RefSeq	CGCACCCACACTGTCTCCAAGGGCCCAGGAAAGAGGGCTCGCCCCAGAAC	9720510	+	KIAA4217;	NM_001033755.1	GI:76253764	synonym: KIAA4217	copine-like protein	549	TRUE	3:9720335-9722315	-4.03557	-4.15509	-3.88848	-0.266612	0.239379	0.0867569	2.75919	0.0063379	0.0401752	-3.60273	-3.81186	-3.3936	-0.418258	0.0061027
cg03698393	HAPLN3	15	87.2398	145864	-	36.1	NCBI:RefSeq	CGGCAGCAGAAAAACCCCCGCGCTCCCGCCAGACCAGCCCCTTAAAGGAA	87239774	-	EXLD1; HsT19883;	NM_178232.2	GI:32455240	extracellular link domain containing; 1; go_component: extracellular matrix (sensu Metazoa); go_function: hyaluronic acid binding; go_process: cell adhesion	hyaluronan and proteoglycan link protein 3	25	TRUE	15:87239252-87239975	-6.1781	-6.30347	-6.0238	-0.27967	0.301009	0.092097	3.26839	0.00127521	0.0134338	-6.01087	-6.18175	-5.84	-0.341744	0.000300582
cg21449655	CASP9	1	15.724	842	-	36.1	NCBI:RefSeq	CGCCACCGCCCCGCCCCCAAGGGCTAGCCTCGTGCCACCGCCCCGCCTCC	15723377	-	MCH6; APAF3; APAF-3; ICE-LAP6; CASPASE-9c;	NM_001229.2	GI:14790123	isoform alpha preproprotein is encoded by transcript variant alpha; caspase 9; apoptosis-related cysteine protease; apoptotic protease MCH-6; apoptotic protease activating factor 3; ICE-like apoptotic protease 6; caspase-9c protein; go_component: intracellular; go_function: protein binding; go_function: caspase activity; go_function: peptidase activity; go_function: protein binding; go_function: …	caspase 9 isoform alpha preproprotein	654	TRUE	1:15722905-15724492	-3.72292	-3.94536	-3.44915	-0.496202	0.478535	0.107917	4.43428	1.52999e-05	0.000528693	-4.56514	-4.65006	-4.48022	-0.169845	0.0130696
cg06476606	IFIT2	10	91.0517	3433	+	36.1	NCBI:RefSeq	AAAGAGTCCTGCCAATTTCACTTTCTAGTTTCACTTTCCCTTTTGTAACG	91051783	+	G10P2; IFI54; cig42; IFI-54; GARG-39; ISG-54K;	NM_001547.3	GI:34222091	Interferon; alpha-inducible protein (MW 54kD); interferon-induced protein 54; go_component: cellular component unknown; go_function: binding; go_process: immune response	interferon-induced protein with tetratricopeptide repeats 2	75	FALSE		-4.39409	-4.45889	-4.31433	-0.144551	0.185706	0.0647173	2.8695	0.00455753	0.0323218	-5.28957	-5.35723	-5.2219	-0.135325	0.00239034
cg14633527	SCOTIN	3	48.5164	51246	-	36.1	NCBI:RefSeq	CGAGCCGGGCAGCACCAGCCCCACTATGCCCCCCACTGACCCCTGATTGC	48516665	-		NM_016479.3	GI:21703709	go_component: nucleus; go_function: DNA binding; go_function: signal transducer activity; go_process: positive regulation of I-kappaB kinase/NF-kappaB cascade	scotin	282	TRUE	3:48516271-48517036	-3.60627	-3.74957	-3.42991	-0.319657	0.326836	0.0746543	4.37799	1.9381e-05	0.000622701	-4.19206	-4.39184	-3.99228	-0.399566	2.82683e-05
cg17804987	MAPKAPK3	3	50.6298	7867	+	36.1	NCBI:RefSeq	GGGACGAACGGCCTGAGAGTACAGACGTGCAGCAAGGGGCGGTGGTCGCG	50629605	+	3PK; MAPKAP3;	NM_004635.3	GI:34335241	MAPKAP kinase 3; go_component: nucleus; go_function: ATP binding; go_function: nucleotide binding; go_function: transferase activity; go_function: MAP kinase kinase activity; go_function: protein serine/threonine kinase activity; go_process: response to stress; go_process: signal transduction; go_process: protein amino acid phosphorylation	mitogen-activated protein kinase-activated protein kinase 3	187	TRUE	3:50628876-50630229	-6.27717	-6.44753	-6.0675	-0.380036	0.381888	0.138331	2.76068	0.00631023	0.0401481	-8.26868	-8.62352	-7.91385	-0.709669	0.0237238
cg15118503	AHSA2	2	61.2584	130872	+	36.1	NCBI:RefSeq	GCTGCCCTGGGGTCTGTGCGGGGCCGCGGGGCCAGGGGGTCAGGGGGCCG	61258325	+	Hch1; DKFZp564C236;	NM_152392.1	GI:22748838	synonyms: Hch1; DKFZp564C236	hypothetical protein LOC130872	40	TRUE	2:61257422-61259263	-4.0458	-4.13882	-3.9313	-0.207518	0.221898	0.0846298	2.62199	0.00942126	0.0523135	-4.29988	-4.38629	-4.21347	-0.172825	0.0361142
cg19001226	HOXD1	2	176.762	3231	+	36.1	NCBI:RefSeq	CGTGGCCGCCCCCGCCGGTATATTAGGCCACTATTTACCTCCGGCTCACT	176761553	+	HOX4; HOX4G; Hox-4.7;	NM_024501.1	GI:13375631	homeo box 4G; homeo box D1; go_component: nucleus; go_function: transcription factor activity; go_process: development; go_process: regulation of transcription; DNA-dependent	homeobox D1	38	TRUE	2:176761031-176762998	-4.86837	-4.96377	-4.75096	-0.212811	0.207971	0.0603727	3.44478	0.000697625	0.00886888	-3.03488	-3.18513	-2.88463	-0.300492	0.000568944
cg02247582	ZNF512	2	27.6596	84450	+	36.1	NCBI:RefSeq	CGGTCCCTCGCTTTTGTCCCATGCTGAGTTGGTTTTATCAGAGGCCATCG	27659397	+	KIAA1805; MGC111046;	NM_032434.2	GI:40217789	go_component: nucleus; go_function: DNA binding; go_function: zinc ion binding; go_function: metal ion binding; go_process: transcription; go_process: regulation of transcription; DNA-dependent	zinc finger protein 512	224	TRUE	2:27659123-27659757	-5.07019	-5.16364	-4.95518	-0.208454	0.217397	0.0698818	3.11092	0.00214046	0.0192334	-5.77252	-5.84259	-5.70246	-0.140128	0.00106984
cg04731091	WDR37	10	1.09292	22884	+	36.1	NCBI:RefSeq	CGGCACTCACCTGTCACAGCAGCTGCGCCCGCCACCCCCGGAGCCAGCCC	1092776	+	FLJ40354; KIAA0982; RP11-529L18.2;	NM_014023.3	GI:71164896	synonyms: FLJ40354; KIAA0982; RP11-529L18.2	WD repeat domain 37	141	TRUE	10:1091673-1093370	-4.99901	-5.15593	-4.80588	-0.350046	0.330685	0.123081	2.68672	0.00782896	0.0462529	-5.91256	-6.00703	-5.81809	-0.188941	0.0289381
cg12454725	SYT17	16	19.0867	51760	+	36.1	NCBI:RefSeq	CGCAGCACCTCCGTTTGGGACGCCCTACGCCCACCTTAACTTGAGGCTCC	19087139	+		NM_016524.2	GI:40068037	go_component: membrane; go_component: synaptic vesicle; go_function: transporter activity; go_process: transport	B/K protein	407	TRUE	16:19086357-19088068	-5.76616	-5.8545	-5.65744	-0.197052	0.277986	0.0790834	3.5151	0.000544819	0.00741119	-7.48971	-7.62283	-7.35658	-0.266248	0.0525882
cg16267059	MFAP1	15	41.9044	4236	-	36.1	NCBI:RefSeq	CGTGTTAGCTTGGTTTGAAGCCAAGAACGGTATAGTGAATAAGAAACTCA	41904243	-		NM_005926.2	GI:50726967		microfibrillar-associated protein 1	181	TRUE	15:41903778-41904458	-5.18102	-5.31624	-5.0146	-0.301639	0.281211	0.0690182	4.07445	6.67143e-05	0.00159765	-5.63155	-5.81493	-5.44817	-0.366759	0.000666286
cg10294200	C12orf30	12	111.031	80018	-	36.1	NCBI:RefSeq	CGGAGAATAAATAGGATAAACAGGAGCAGCCGAACCCTAACTTTGAGAGC	111030980	-	FLJ13089;	NM_024953.2	GI:38679913	go_function: binding	hypothetical protein LOC80018	308	TRUE	12:111030355-111032307	-5.14016	-5.24371	-5.01271	-0.231005	0.218624	0.0756464	2.89008	0.00428102	0.0310449	-7.27869	-7.56924	-6.98813	-0.581109	0.000539559
cg08816248	SYNJ2BP	14	69.9536	55333	-	36.1	NCBI:RefSeq	GCCCGAAGGACTCGGAGCACTGGGAATGCTGGGAATCGTGGTTCCTACCG	69953515	-	Arip2; OMP25; FLJ11271;	NM_018373.1	GI:8922963	activin receptor interacting protein 5; go_component: mitochondrion; go_component: outer membrane; go_component: integral to membrane; go_function: protein binding	synaptojanin 2 binding protein	97	TRUE	14:69953185-69953706	-4.90028	-5.02751	-4.7437	-0.283809	0.291957	0.085975	3.39584	0.000826709	0.0099626	-5.0296	-5.08996	-4.96924	-0.120714	0.0547164
cg21516478	GPX3	5	150.381	2878	+	36.1	NCBI:RefSeq	GGTGCATTGCACTGAGCGCTGGACACCGAGGGGCTAGGTTTTTTCTCCCG	150380112	+	9606;	NM_002084.2	GI:6006000	go_component: soluble fraction; go_component: extracellular region; go_function: selenium binding; go_function: oxidoreductase activity; go_function: electron transporter activity; go_function: glutathione peroxidase activity; go_process: response to lipid hydroperoxide	plasma glutathione peroxidase 3 precursor	409	TRUE	5:150380065-150380874	-3.89928	-3.9797	-3.80029	-0.179414	0.193045	0.0441476	4.37271	1.98137e-05	0.0006307	-3.29516	-3.51361	-3.07671	-0.436902	2.83712e-07
cg02577849	ADAMTS6	5	64.8134	11174	-	36.1	NCBI:RefSeq	CGGCCCCCAGCCAACTTGAATTGCAGCAGGAGAAAATTTTGGCAGCTTTT	64813460	-	ADAM-TS6;	NM_197941.2	GI:64276807	a disintegrin and metalloproteinase with thrombospondin motifs 6; a disintegrin-like and metalloprotease (reprolysin type) with thrombospondin type 1 motif; 6; go_component: extracellular matrix (sensu Metazoa); go_function: zinc ion binding; go_function: metal ion binding; go_function: peptidase activity; go_function: metalloendopeptidase activity; go_process: proteolysis	ADAM metallopeptidase with thrombospondin type 1 motif; 6 preproprotein	26	FALSE		-3.9051	-3.95833	-3.83958	-0.118744	0.135012	0.0501637	2.69142	0.00772343	0.0458794	-4.48892	-4.58525	-4.39259	-0.192659	3.86403e-05
cg15003434	SURF6	9	135.193	6838	-	36.1	NCBI:RefSeq	CGGCCCGGGTCTCCGCCATGGCCTCTCTACTCGCCAAGGACGCCTACCTG	135192865	-	FLJ30322;	NM_006753.3	GI:39812452	surfeit locus protein 6; go_component: granular component; go_function: DNA binding; go_function: RNA binding; go_process: ribosome assembly	surfeit 6	59	TRUE	9:135192263-135193176	-4.18359	-4.28699	-4.05632	-0.230672	0.216858	0.0583741	3.71496	0.00026431	0.00444001	-3.14346	-3.31288	-2.97404	-0.338831	1.78378e-08
cg15375239	SPINT2	19	43.4471	10653	+	36.1	NCBI:RefSeq	GTTGGGAGGTGTAGCGCGGCTCTGAACGCGCTGAGGGCCGTTGAGTGTCG	43447042	+	PB; Kop; HAI2; HAI-2;	NM_021102.2	GI:57242801	placental bikunin; Kunitz-type serine protease inhibitor; hepatocyte growth factor activator inhibitor type 2; go_component: soluble fraction; go_component: extracellular region; go_component: integral to membrane; go_function: serine-type endopeptidase inhibitor activity; go_process: cell motility	serine protease inhibitor; Kunitz type; 2	85	TRUE	19:43446599-43447858	-6.65238	-6.81436	-6.45301	-0.36135	0.475584	0.147836	3.21698	0.00151342	0.0152415	-9.01116	-9.83908	-8.18324	-1.65584	2.15489e-07
cg09576882	POLS	5	6.76799	11044	+	36.1	NCBI:RefSeq	CGTGGAGTGACTTGCCCAGATCCTACAAGTAACAGTCCAAGAAAAGGGGC	6767718	+	POLK; TRF4; LAK-1; TRF4-1;	NM_006999.3	GI:62548868	topoisomerase-related function protein 4-1; polymerase (DNA-directed) sigma; DNA polymerase kappa; go_component: nucleus; go_function: DNA binding; go_function: transferase activity; go_function: DNA-directed DNA polymerase activity; go_process: mitosis; go_process: cell division; go_process: DNA repair; go_process: DNA replication; go_process: sister chromatid cohesion; go_process: DNA replicati…	DNA polymerase sigma	269	TRUE	5:6765169-6768064	-3.48618	-3.5556	-3.40075	-0.154858	0.176237	0.0359898	4.89686	2.01765e-06	0.000111106	-3.36035	-3.50279	-3.2179	-0.284889	2.47063e-06
cg07278624	TCP11L2	12	105.221	255394	+	36.1	NCBI:RefSeq	AGGTGACTGTGCTGTGCTCGGTGAGGGGACGCCCAGAGAGCCCTGACCCG	105220711	+	MGC40368;	NM_152772.1	GI:22749516	synonym: MGC40368	hypothetical protein LOC255394	92	TRUE	12:105219741-105221331	-3.26929	-3.32036	-3.20644	-0.113921	0.124293	0.0465883	2.6679	0.00826488	0.0479345	-3.16716	-3.24135	-3.09297	-0.148374	0.00296748
cg04565661	SEMA5B	3	124.23	54437	-	36.1	NCBI:RefSeq	TAGCCATCAGAAACACTAGATCACTTAAACTTGTAAACAATTCGGCCTCG	124230142	-	SemG; SEMAG; FLJ10372; KIAA1445;	NM_018987.1	GI:39930366	isoform 2 is encoded by transcript variant 2; go_component: membrane; go_component: integral to membrane; go_function: receptor activity; go_process: cell differentiation; go_process: nervous system development	semaphorin 5B isoform 2	12	TRUE	3:124227757-124230277	-5.70246	-5.80848	-5.57197	-0.236509	0.222015	0.0647033	3.43128	0.000731202	0.00916562	-6.54355	-6.65747	-6.42962	-0.227846	0.0093451
cg20518716	EEF1G	11	62.0987	1937	-	36.1	NCBI:RefSeq	CGCTGGAAGACCTGACATCGTCGCTTCTGATGTTCATGGCTTTTGACCCA	62097927	-	EF1G;	NM_001404.3	GI:25453475	elongation factor 1-gamma; EF-1-gamma; eEF-1B gamma; translation elongation factor eEF-1 gamma chain; PRO1608; pancreatic tumor-related protein; go_component: intracellular; go_component: eukaryotic translation elongation factor 1 complex; go_function: translation elongation factor activity; go_process: protein biosynthesis; go_process: translational elongation	eukaryotic translation elongation factor 1 gamma	725	TRUE	11:62097017-62099117	-4.76827	-4.89289	-4.61489	-0.277999	0.289871	0.0757838	3.82498	0.00017522	0.00326575	-5.30582	-5.4559	-5.15574	-0.300164	2.96946e-07
cg08715837	TUBA8	22	16.9736	51807	+	36.1	NCBI:RefSeq	GCGGCTGTATCTGGAGCAGTCGGGGCGGGCAGGCCCAGCTGAGAGGTGCG	16973559	+	TUBAL2;	NM_018943.1	GI:9507214	tubulin; alpha-like 2; go_component: cytoskeleton; go_component: microtubule; go_component: protein complex; go_function: GTP binding; go_function: GTPase activity; go_function: nucleotide binding; go_function: structural molecule activity; go_process: protein polymerization; go_process: microtubule-based movement	tubulin; alpha 8	50	TRUE	22:16973047-16974368	-4.50857	-4.6308	-4.35813	-0.272676	0.266602	0.0728881	3.65769	0.0003262	0.00515587	-4.92926	-5.05109	-4.80744	-0.243644	0.0248062
cg15428653	ABCA2	9	139.043	20	-	36.1	NCBI:RefSeq	AGTTCGGGATCAGGCGGTTCTGCGGCTGTGGCTTGGCACCTGCTGGGGCG	139043195	-	ABC2;	NM_001606.3	GI:45446739	isoform a is encoded by transcript variant 1; go_component: integral to membrane; go_component: integral to membrane; go_component: lysosomal membrane; go_component: ATP-binding cassette (ABC) transporter complex; go_function: ATP binding; go_function: ATPase activity; go_function: nucleotide binding; go_function: ATPase activity; coupled to transmembrane movement of substances; go_process: trans…	ATP-binding cassette; sub-family A; member 2 isoform a	28	TRUE	9:139041919-139043331	-3.59249	-3.72046	-3.435	-0.28546	0.286261	0.0767322	3.73066	0.000249394	0.00423785	-4.38174	-4.48809	-4.27539	-0.212699	0.00117147
cg18089145	SEC23A	14	38.6422	10484	-	36.1	NCBI:RefSeq	GGTTATTAAGCAAGCTCAGGGGTCCGGTGGCCTGCCCTGGTAACTCTGCG	38642188	-	MGC26267;	NM_006364.2	GI:38202213	Sec23 (S. cerevisiae) homolog A; protein transport protein SEC23A; transport protein Sec23 isoform A; go_component: Golgi stack; go_component: cytosol; go_component: COPII vesicle coat; go_component: endoplasmic reticulum; go_function: protein binding; go_process: ER to Golgi transport; go_process: vesicle-mediated transport; go_process: intracellular protein transport	SEC23-related protein A	56	TRUE	14:38641707-38642637	-4.99504	-5.0635	-4.91077	-0.152731	0.152242	0.0564032	2.69917	0.00755232	0.0452151	-5.01376	-5.05308	-4.97443	-0.0786416	0.0228533
cg09903430	ST3GAL3	1	43.9452	6487	+	36.1	NCBI:RefSeq	CGGCTGAGCCCTGGTGTTATCCGCCTGGGGCGGAATTTAAAACTTAATTC	43945805	+	ST3N; SIAT6; ST3GALII; ST3GalIII; ST3Gal III;	NM_006279.2	GI:28373066	isoform j is encoded by transcript variant 10; Gal beta-1;3(4)GlcNAc alpha-2;3 sialyltransferase; CMP-N-acetylneuraminate-beta-1;4-galactoside alpha-2;3-sialyltransferase; alpha-2;3-sialyltransferase II; alpha 2;3-sialyltransferase III; sialyltransferase 6 (N-acetyllacosaminide alpha 2;3-sialyltransferase); go_component: membrane; go_component: Golgi stack; go_component: integral to membrane; go_…	sialyltransferase 6 isoform j	613	TRUE	1:43945075-43946525	-3.874	-4.00641	-3.71103	-0.295378	0.332729	0.0621351	5.35494	2.36021e-07	2.04237e-05	-4.62134	-4.75401	-4.48867	-0.265337	0.0505296
cg08261666	VAMP2	17	8.00698	6844	-	36.1	NCBI:RefSeq	GGGCAGCGGGTGGAGGACTTGGCAGCGGCAGTGATGGCGGCGGCGGCTCG	8007017	-	SYB2; VAMP-2;	NM_014232.1	GI:7657674	synaptobrevin 2; vesicle associated membrane protein 2; go_component: synapse; go_component: synaptosome; go_component: integral to membrane; go_process: vesicle-mediated transport	vesicle-associated membrane protein 2 (synaptobrevin 2)	41	TRUE	17:8006394-8007361	-4.97716	-5.08194	-4.84819	-0.233749	0.2177	0.0739434	2.94414	0.00362584	0.0277187	-4.13528	-4.30891	-3.96166	-0.347251	2.05712e-06
cg25420583	WBP1	2	74.5391	23559	+	36.1	NCBI:RefSeq	CGGCCGGAGCTTCCATCCGGGCAGAACTCCACCAACTAGGACTCAGATTG	74539085	+	WBP-1; MGC15305;	NM_012477.2	GI:24430130	go_component: cellular component unknown; go_function: protein binding; go_process: biological process unknown	WW domain binding protein 1	25	TRUE	2:74537805-74539343	-4.70407	-4.8686	-4.50158	-0.367018	0.393147	0.0844039	4.65793	5.85084e-06	0.000256925	-4.77707	-4.8758	-4.67835	-0.197454	0.00197406
cg19123863	JUNB	19	12.7637	3726	+	36.1	NCBI:RefSeq	AGGGGTCGGCCAGGTTGACCGCCAGGCTCGGTTTCAGGAGTTTGTAGTCG	12763310	+		NM_002229.2	GI:44921611	go_component: nucleus; go_component: chromatin; go_function: transcription factor activity; go_function: transcription coactivator activity; go_function: transcription corepressor activity; go_function: RNA polymerase II transcription factor activity; go_process: transcription; go_process: regulation of transcription; DNA-dependent; go_process: regulation of transcription from RNA polymerase II p…	jun B proto-oncogene	365	TRUE	19:12762975-12766086	-5.02678	-5.16392	-4.85799	-0.305931	0.2867	0.104892	2.7333	0.00683824	0.0423687	-5.83239	-5.96731	-5.69748	-0.269838	0.00209136
cg12405833	RUNDC2A	16	11.9782	84127	+	36.1	NCBI:RefSeq	CGCCGCTCCAGCTGCACACTCCGGCCCCTGCGTCCTCGCGCCCCGCTCCC	11978103	+	FLJ12363;	NM_032167.1	GI:14149848	go_function: transcription factor activity; go_process: regulation of transcription; DNA-dependent	RUN domain containing 2A	117	TRUE	16:11977636-11978441	-4.17118	-4.29224	-4.02218	-0.270059	0.266217	0.0829786	3.20826	0.00155765	0.0155125	-4.59553	-4.72702	-4.46405	-0.26297	0.000587284
cg02335804	TCF2	17	33.1794	6928	-	36.1	NCBI:RefSeq	AGAAGACCTGGGCCGGGAGCGGGGCTTTGCCAGGGTCCATTGTACTCACG	33179182	-	HNF2; LFB3; HNF1B; MODY5; VHNF1; HNF1beta;	NM_000458.1	GI:4507396	isoform a is encoded by transcript variant a; go_component: nucleus; go_function: sequence-specific DNA binding; go_function: transcription factor activity; go_function: transcriptional activator activity; go_process: positive regulation of transcription; go_process: regulation of transcription; DNA-dependent	transcription factor 2 isoform a	170	FALSE		-5.3725	-5.54192	-5.16399	-0.377929	0.356002	0.128062	2.77991	0.00596162	0.0387562	-6.67565	-6.83614	-6.51516	-0.320983	0.0183319
cg05098732	FOXA3	19	51.0596	3171	+	36.1	NCBI:RefSeq	TGAAGATGGAGGCCCATGACCTGGCCGAGTGGAGCTACTACCCGGAGGCG	51059358	+	FKHH3; HNF3G; TCF3G; MGC10179;	NM_004497.2	GI:24497505	hepatocyte nuclear factor 3; gamma; go_component: nucleus; go_function: transcription factor activity; go_function: specific RNA polymerase II transcription factor activity; go_process: transcription; go_process: regulation of transcription; DNA-dependent	forkhead box A3	258	TRUE	19:51057367-51059984	-3.50025	-3.58048	-3.40151	-0.178978	0.179729	0.0550394	3.26546	0.00128779	0.0135385	-4.86998	-5.16701	-4.57294	-0.594068	0.00776536
cg22957381	KCND3	1	112.334	3752	-	36.1	NCBI:RefSeq	CGCTGCTCCCACGCCTGTTGCTCCGGCTGCCCACGCGGCACCCTCCCACT	112333300	-	KV4.3; KCND3L; KCND3S; KSHIVB;	NM_004980.3	GI:27436983	isoform 1 is encoded by transcript variant 1; sha1-related potassium channel Kv4.3; voltage-gated K+ channel; potassium ionic channel Kv4.3; voltage-gated potassium channel Kv4.3; go_component: membrane; go_component: integral to membrane; go_component: voltage-gated potassium channel complex; go_component: voltage-gated potassium channel complex; go_function: protein binding; go_function: metal …	potassium voltage-gated channel; Shal-related subfamily; member 3 isoform 1	301	TRUE	1:112332922-112335442	-4.66203	-4.73121	-4.57689	-0.154315	0.139536	0.0512475	2.72279	0.00705121	0.0433362	-4.54671	-4.6504	-4.44302	-0.20738	0.00272798
cg26752657	C1orf171	1	74.9717	127253	+	36.1	NCBI:RefSeq	TGTGCAGTTTCTGAACATGCGAGATCAGTTTTTCACCACCAGCTCCTGCG	74971428	+	FLJ40918;	NM_138467.1	GI:42734380	synonym: FLJ40918	hypothetical protein LOC127253	235	TRUE	1:74971242-74971834	-4.74492	-5.13532	-4.26443	-0.870885	0.800487	0.130024	6.15644	4.06323e-09	7.15233e-07	-6.03929	-6.32638	-5.75221	-0.574176	8.01984e-05
cg01357263	BCL7A	12	120.944	605	+	36.1	NCBI:RefSeq	GAGGCTGCAGGTGCCGAGGGGTCCATGGGAGACAGCCGGTCTGCGGGGCG	120944244	+	BCL7;	NM_020993.3	GI:67190621	isoform a is encoded by transcript variant 1; B-cell CLL/lymphoma-7; go_function: actin binding; go_function: protein binding	B-cell CLL/lymphoma 7A isoform a	352	TRUE	12:120943531-120946120	-5.44753	-5.57976	-5.28478	-0.294981	0.325261	0.0844698	3.85062	0.000159001	0.00304617	-5.84696	-5.96536	-5.72855	-0.236807	0.0300051
cg21288099	RRAS2	11	14.3369	22800	-	36.1	NCBI:RefSeq	CGCCGACTTGCCCACGCCGCCCCCGCCGACCACCACGAGCCGGTACTTCT	14337289	-	TC21;	NM_012250.3	GI:38569462	oncogene TC21; go_function: GTP binding; go_function: nucleotide binding; go_function: protein binding; go_process: intracellular protein transport; go_process: small GTPase mediated signal transduction	related RAS viral (r-ras) oncogene homolog 2	383	TRUE	11:14336114-14337604	-6.37126	-6.52374	-6.18359	-0.340145	0.364505	0.0713072	5.11176	7.49801e-07	4.98134e-05	-8.57967	-8.86188	-8.29745	-0.564431	0.0322407
cg06707338	EEF1B2	2	206.733	1933	+	36.1	NCBI:RefSeq	CGCAACGAAAGGTCCATGGACAATTTGTGGGCCATTTAATTCAGGGCCCC	206732579	+	EF1B; EEF1B; EEF1B1;	NM_021121.2	GI:16519563	eukaryotic translation elongation factor 1 beta 1; go_component: eukaryotic translation elongation factor 1 complex; go_function: translation elongation factor activity; go_process: protein biosynthesis; go_process: translational elongation	eukaryotic translation elongation factor 1 beta 2	118	TRUE	2:206731983-206733391	-6.03554	-6.11028	-5.94354	-0.166741	0.180572	0.0663356	2.7221	0.00706541	0.0433976	-7.07851	-7.20547	-6.95155	-0.253924	0.0155664
cg08426384	ADCK1	14	77.3365	57143	+	36.1	NCBI:RefSeq	CGCCCCCCTGCAGTGACTTCTCCAGTTTGGCACACCAGTGGGCTTTCATG	77336227	+	FLJ39600;	NM_020421.2	GI:40254937	go_function: ATP binding; go_function: protein kinase activity; go_process: protein amino acid phosphorylation	aarF domain containing kinase 1	260	TRUE	14:77335597-77336576	-4.36881	-4.41975	-4.30611	-0.11364	0.145426	0.0549596	2.64606	0.00879802	0.0499435	-4.56062	-4.64657	-4.47468	-0.171886	0.00044989
cg23179168	FAM84B	8	127.639	157638	-	36.1	NCBI:RefSeq	GAGGTAGCGCTGCAGGTGAGCCAGGTAGGGTGACTCACCTGTCCAGGTCG	127639648	-	NSE2; BCMP101;	NM_174911.3	GI:40255195	go_component: cytoplasm; go_component: plasma membrane; go_function: protein binding	breast cancer membrane protein 101	301	TRUE	8:127639208-127640204	-5.39537	-5.51043	-5.25376	-0.256668	0.265571	0.0973901	2.72688	0.00696767	0.0429767	-3.47261	-3.7877	-3.15753	-0.630166	4.16201e-05
cg19774491	PROS1	3	95.1752	5627	-	36.1	NCBI:RefSeq	CGCTATTGATTACTCACAGTTTGCCTCTGAGACGGGAAGCACTAGGAGGA	95175395	-	PSA; PROS; PS21; PS22; PS23; PS24; PS25; PS 26; Protein S; protein Sa;	NM_000313.1	GI:4506116	preproprotein S; propiece of latent protein S; truncated CDS due to variation; go_component: extracellular region; go_function: calcium ion binding; go_function: endopeptidase inhibitor activity; go_process: blood coagulation	protein S (alpha)	204	TRUE	3:95175056-95175601	-4.6351	-4.71455	-4.53731	-0.177243	0.175199	0.0671298	2.60985	0.00975041	0.0534637	-5.32241	-5.43491	-5.20991	-0.225004	0.014847
cg20856064	PH-4	3	49.0022	54681	+	36.1	NCBI:RefSeq	CGCAGTCCCAGCCTCCGCGGCGCCCCCAAATGCCGCACTGTTGAGTCATC	49002345	+		NM_017732.3	GI:62953124	isoform b is encoded by transcript variant 2; proline 4-hydroxylase; go_component: membrane; go_component: endoplasmic reticulum; go_function: iron ion binding; go_function: calcium ion binding; go_function: L-ascorbic acid binding; go_function: oxidoreductase activity; go_function: oxidoreductase activity; acting on single donors with incorporation of molecular oxygen; incorporation of two atoms…	hypoxia-inducible factor prolyl 4-hydroxylase isoform b	131	TRUE	3:49002010-49003478	-3.6377	-3.72221	-3.53368	-0.188533	0.205037	0.0736151	2.78525	0.00586803	0.0383536	-2.27487	-2.42283	-2.12691	-0.295912	2.83733e-09
cg21681756	NDUFS3	11	47.5567	4722	+	36.1	NCBI:RefSeq	CGGATATCCCAGGCTAGGCTTCATATGGAGCGTCTTAACTCCATGCGCTG	47557208	+		NM_004551.1	GI:4758787	NADH dehydrogenase (ubiquinone) Fe-S protein 3 (30kD) (NADH-coenzyme Q reductase); go_component: mitochondrion; go_component: membrane fraction; go_function: NADH dehydrogenase activity; go_function: electron carrier activity; go_function: NADH dehydrogenase (ubiquinone) activity; go_function: NADH dehydrogenase (ubiquinone) activity; go_function: oxidoreductase activity; acting on NADH or NADPH;…	NADH dehydrogenase (ubiquinone) Fe-S protein 3; 30kDa (NADH-coenzyme Q reductase)	551	TRUE	11:47556637-47557646	-5.68207	-5.77736	-5.5648	-0.212556	0.224555	0.0653218	3.43767	0.000715114	0.0090299	-5.27463	-5.37456	-5.17469	-0.19987	0.000227519
cg01663968	CTSZ	20	57.0154	1522	-	36.1	NCBI:RefSeq	TCCGCTGGGGCGCAGGTGGGCACCGGCGGGGAGGCAGCCCTGGGGGGACG		-	9606;	NT_011362.9	cathepsin Z preproprotein	cathepsin X precursor; preprocathepsin P; cathepsin Z precursor; go_component: lysosome; go_function: cysteine-type peptidase activity; go_function: cysteine-type endopeptidase activity; go_process: proteolysis; go_process: proteolysis			TRUE	20:57015249-57016051	-4.46824	-4.57933	-4.3315	-0.247835	0.235936	0.0877191	2.68968	0.00776248	0.0460317	-4.92948	-4.97965	-4.87931	-0.100338	0.00744156
cg10885645	CLSTN3	12	7.17429	9746	+	36.1	NCBI:RefSeq	CGGGAAGCCGCTGCAAGTCCACCGCCTCAGCTACCCAGATTGGGATCTGC	7174237	+	CSTN3; alcbeta; KIAA0726;	NM_014718.2	GI:42475533	alcadein beta; go_component: membrane; go_function: calcium ion binding; go_process: homophilic cell adhesion	calsyntenin 3	57	TRUE	12:7174187-7174394	-5.30612	-5.36666	-5.2316	-0.135056	0.165024	0.0595125	2.77293	0.00608607	0.03928	-5.22561	-5.32323	-5.128	-0.195233	0.000638916
cg20010396	ZNF297	6	33.3938	9278	-	36.1	NCBI:RefSeq	AGGCTCCGCCTCTGAGCTGTGACCATTAGCTGGTTGGTGGGATCTAATCG	33393472	-	BING1; ZBTB22A; ZNF297A;	NM_005453.3	GI:20070223	go_component: nucleus; go_component: nucleus; go_function: DNA binding; go_function: protein binding; go_function: zinc ion binding; go_function: metal ion binding; go_function: nucleic acid binding; go_process: transcription; go_process: regulation of transcription; DNA-dependent	zinc finger protein 297	333	TRUE	6:33393091-33394194	-5.26216	-5.36308	-5.13794	-0.225137	0.216302	0.070228	3.08001	0.00236409	0.0205871	-4.81913	-4.89088	-4.74737	-0.143506	0.00138816
cg06971096	PTPRN	2	219.882	5798	-	36.1	NCBI:RefSeq	CGCCTGTCACCACCTCCCAGGCGCCTCGGAGCAAGTGGCTTCTCCTGTGG	219882387	-	IA2; IA-2; ICA512; R-PTP-N; IA-2/PTP;	NM_002846.2	GI:18860905	islet cell antigen 512; islet cell antigen 2; islet cell autoantigen 3; protein tyrosine phosphatase-like N precursor; go_component: membrane; go_component: integral to plasma membrane; go_function: receptor activity; go_function: protein binding; go_function: transmembrane receptor protein tyrosine phosphatase activity; go_process: protein amino acid dephosphorylation	protein tyrosine phosphatase; receptor type; N precursor	552	TRUE	2:219881750-219882661	-3.08238	-3.18311	-2.95842	-0.22469	0.200456	0.0608964	3.29175	0.00117897	0.0127325	-2.20513	-2.5579	-1.85237	-0.705527	0.00737827
cg08651674	RREB1	6	7.05344	6239	+	36.1	NCBI:RefSeq	CGGGACACACCGAGTTTCAAAAGTACAACGCGCTCTGCAGACTTCACCCT	7053263	+	FINB; LZ321; Zep-1; RREB-1;	NM_002955.4	GI:51173732	isoform 2 is encoded by transcript variant 2; DNA-binding protein; finger protein in nuclear bodies; zinc finger motif enhancer binding protein 1; go_component: nucleus; go_component: nucleus; go_component: cytoplasm; go_component: nuclear body; go_function: DNA binding; go_function: zinc ion binding; go_function: metal ion binding; go_function: nucleic acid binding; go_function: transcriptional …	ras responsive element binding protein 1 isoform 2	177	TRUE	6:7051911-7055075	-5.31462	-5.39071	-5.22096	-0.169751	0.160171	0.0523243	3.06113	0.00251102	0.0214138	-4.00914	-4.08699	-3.9313	-0.155691	0.00464171
cg25718402	CLDN7	17	7.10663	1366	-	36.1	NCBI:RefSeq	CGTCACCGAAGGGACACTCACCTGAACCGGAAGTCGTGGCCCCCACCCCT	7106513	-	CEPTRL2; CPETRL2; Hs.84359; claudin-1;	NM_001307.3	GI:34222214	Clostridium perfringens enterotoxin receptor-like 2; claudin 9; go_component: membrane; go_component: tight junction; go_component: integral to membrane; go_function: protein self binding; go_function: structural molecule activity; go_process: calcium-independent cell-cell adhesion	claudin 7	120	TRUE	17:7104851-7107119	-6.52263	-6.62197	-6.40037	-0.221597	0.238838	0.0630012	3.791	0.000199132	0.00360697	-6.44474	-6.61309	-6.2764	-0.336681	0.00435919
cg02437376	VDAC2	10	76.6399	7417	+	36.1	NCBI:RefSeq	CGCTAGGACCCGCTCACATTTGTTCAGGGAGAGGCAGTCCCAAAAAGCCT	76640569	+	FLJ23841;	NM_003375.2	GI:42476280	go_component: mitochondrion; go_component: integral to membrane; go_component: mitochondrial outer membrane; go_component: mitochondrial outer membrane; go_function: voltage-gated ion-selective channel activity; go_function: voltage-gated anion channel porin activity; go_process: anion transport; go_process: anion transport	voltage-dependent anion channel 2	683	TRUE	10:76639627-76641186	-5.58386	-5.67209	-5.47528	-0.196806	0.209121	0.075039	2.78684	0.00584049	0.0382343	-5.95603	-6.10514	-5.80692	-0.298225	0.00377108
cg06661765	NFIX	19	12.9676	4784	+	36.1	NCBI:RefSeq	CTGGGTGAGGCAGTACGGGGAGTACATAGCTGGGCGCCCGGGCGGGAGCG	12967584	+	NF1A;	NM_002501.2	GI:56549648	go_component: nucleus; go_component: nucleus; go_function: transcription factor activity; go_function: RNA polymerase II transcription factor activity; enhancer binding; go_process: transcription; go_process: DNA replication; go_process: DNA replication; go_process: regulation of transcription; DNA-dependent; go_process: regulation of transcription; DNA-dependent; go_process: transcription from R…	nuclear factor I/X (CCAAT-binding transcription factor)	45	TRUE	19:12966614-12968816	-5.55585	-5.67833	-5.4051	-0.273225	0.255107	0.0969549	2.63119	0.00917853	0.0513953	-6.08083	-6.19679	-5.96488	-0.231909	0.00521074
cg05368942	RBM15	1	110.683	64783	+	36.1	NCBI:RefSeq	CGCGGGGAGATGTAAAGATAGACAAATAATTTTCCCAATGAGACTGTAGA	110683468	+	OTT; OTT1; SPEN; FLJ12479; FLJ21943; MGC119584;	NM_022768.4	GI:47933338	one twenty two protein; go_component: nucleus; go_function: RNA binding; go_function: nucleotide binding; go_process: regulation of transcription	RNA binding motif protein 15	15	TRUE	1:110681797-110684803	-4.88337	-4.95377	-4.79671	-0.15706	0.202786	0.0523607	3.87286	0.000146096	0.00285469	-5.41447	-5.48681	-5.34213	-0.144678	0.000966522
cg01787047	RAD9A	11	66.9157	5883	+	36.1	NCBI:RefSeq	CGCCCGGGAACTCTACTAAGTGGGTGACCCCAGAGAGCTCGCCCCCACAC	66915999	+	RAD9;	NM_004584.2	GI:19924112	RAD9 homolog (S. pombe); RAD9 (S. pombe) homolog; cell cycle checkpoint control protein; go_component: nucleus; go_process: DNA repair; go_process: DNA damage checkpoint; go_process: DNA replication checkpoint; go_process: regulation of progression through cell cycle	RAD9 homolog	344	TRUE	11:66915580-66916638	-5.72072	-5.91784	-5.47811	-0.439725	0.471351	0.101323	4.65195	6.00581e-06	0.000262054	-8.69116	-8.94525	-8.43706	-0.508193	0.0134954
cg10482024	AK3L1	1	65.3856	205	+	36.1	NCBI:RefSeq	ACAGTAGGCGCTCAACAAGTTGTATTTTTCCCTTCCCTTGCAGTAGACCG	65385820	+	AK3; AK4;	NM_013410.2	GI:53831999	GTP:AMP phosphotransferase; mitochondrial adenylate kinase-3; mitochondrial adenylate kinase isoenzyme 4; nucleoside-triphosphate-adenylate kinase; ATP-AMP transphosphorylase; go_component: mitochondrion; go_function: ATP binding; go_function: GTP binding; go_function: kinase activity; go_function: nucleotide binding; go_function: transferase activity; go_function: adenylate kinase activity; go_p…	adenylate kinase 3-like 1	190	TRUE	1:65385494-65387852	-4.90849	-4.96533	-4.83853	-0.126805	0.193164	0.0590864	3.26918	0.00127187	0.0134054	-4.2328	-4.56076	-3.90485	-0.655906	1.31312e-07
cg19385139	COL4A2	13	109.756	1284	+	36.1	NCBI:RefSeq	CGGCCTGTGGGACTGCATGGCTGTGACACTGAGCAACAGCTGAAGTCTTT	109757632	+	FLJ22259;	NM_001846.1	GI:17986276	canstatin; go_component: collagen; go_component: cytoplasm; go_component: collagen type IV; go_component: collagen type IV; go_function: extracellular matrix structural constituent; go_function: extracellular matrix structural constituent; go_process: phosphate transport; go_process: extracellular matrix organization and biogenesis	alpha 2 type IV collagen preproprotein	1270	FALSE		-2.20115	-2.25078	-2.14008	-0.110699	0.120049	0.0368201	3.26043	0.00130968	0.0137197	-2.24173	-2.39036	-2.0931	-0.297262	3.12585e-05
cg24552431	ATAD1	10	89.5679	84896	-	36.1	NCBI:RefSeq	CGGGAACCAGCTACTCACCCAGGGGCAGAAACAGCAAGAGCAAGTGCCCT	89567897	-	AFDC1; FNP001; FLJ14600;	NM_032810.2	GI:31377643	go_function: ATP binding; go_function: nucleotide binding; go_function: nucleoside-triphosphatase activity	ATPase family; AAA domain containing 1	11	TRUE	10:89567349-89568720	-5.11114	-5.18349	-5.02209	-0.161401	0.17889	0.059224	3.02057	0.00285571	0.0234409	-5.33118	-5.40806	-5.2543	-0.153755	0.00443828
cg19744952	CIC	19	47.4808	23152	+	36.1	NCBI:RefSeq	TGTTCGGTCAGTAGCGCCTGGGCCCTGGGACTGCAGGGGTCAAGGTGTCG	47480657	+	KIAA0306;	NM_015125.2	GI:16507207	member of HMG superfamily; extends amino terminus of KIAA0306 protein with GenBank Accession Number AAD11988; capicua (Drosophila) homolog; go_component: nucleus; go_function: DNA binding; go_process: regulation of transcription; DNA-dependent	capicua homolog	149	TRUE	19:47479243-47481094	-2.85668	-2.9326	-2.76325	-0.169354	0.209022	0.0430361	4.85689	2.41735e-06	0.000129312	-2.74718	-2.87893	-2.61544	-0.263495	5.50386e-06
cg24836583	HOMER3	19	18.9127	9454	-	36.1	NCBI:RefSeq	CGCCGCTCCCAGTCCCGGGTCCGAAACTTCTGGGGAACCCCCACGCCCTC	18912983	-	HOMER-3;	NM_004838.2	GI:21361156	Homer-3D protein; go_component: cellular component unknown; go_function: protein binding; go_process: protein targeting; go_process: metabotropic glutamate receptor signaling pathway	Homer; neuronal immediate early gene; 3	236	TRUE	19:18911959-18913405	-4.77446	-4.89921	-4.62093	-0.278282	0.246218	0.0842653	2.92193	0.00388301	0.0290908	-5.02724	-5.10577	-4.94871	-0.157055	0.00363578
cg05306735	ZNF273	7	64.001	10793	+	36.1	NCBI:RefSeq	CATTCAGGGCCTGAGGGGGCGGGTCCTTAAACATCCTCCAATCAGGGACG	64001101	+	HZF9; MGC12518;	NM_021148.1	GI:40538737	go_component: nucleus; go_component: intracellular; go_function: DNA binding; go_function: zinc ion binding; go_function: metal ion binding; go_function: nucleic acid binding; go_process: transcription; go_process: regulation of transcription; DNA-dependent	zinc finger protein 273	91	TRUE	7:64000971-64001172	-3.97497	-4.06736	-3.86127	-0.206089	0.207453	0.0738834	2.80784	0.00548661	0.0366873	-4.75098	-4.84819	-4.65378	-0.194406	0.0142699
cg14590817	ADARB2	10	1.76973	105	-	36.1	NCBI:RefSeq	CGCAGGGAGCTTGTCTATTTGCTGCAGCAGCGTCTAATTAGATCCAATCA	1769670	-	RED2; ADAR3; hRED2; FLJ36975;	NM_018702.1	GI:8922076	adenosine deaminase; RNA-specific; B2 (RED1 homolog rat); double-stranded RNA specific adenosine deaminase; homolog of rat BLUE; go_component: nucleus; go_function: RNA binding; go_function: metal ion binding; go_function: hydrolase activity; go_function: adenosine deaminase activity; go_function: double-stranded RNA binding; go_function: single-stranded RNA binding; go_function: adenosine deamin…	adenosine deaminase; RNA-specific; B2	60	TRUE	10:1768650-1770172	-4.68508	-4.78875	-4.55748	-0.231279	0.216518	0.0654502	3.30813	0.00111553	0.0122661	-5.14629	-5.21218	-5.08041	-0.131774	0.00428139
cg26832142	PDE4B	1	66.031	5142	+	36.1	NCBI:RefSeq	AATTGACAGGTGGTGGCCTCAGCAGTTACAACCTACTACACAGCATCTCG	66031452	+	DPDE4; PDEIVB; MGC126529; DKFZp686F2182;	NM_002600.2	GI:32171240	dunce-like phosphodiesterase E4; cAMP-specific 3 ;5prime-cyclic phosphodiesterase 4B; PDE32; 3 ;5prime-cyclic AMP phosphodiesterase; go_component: soluble fraction; go_component: insoluble fraction; go_function: hydrolase activity; go_function: cAMP-specific phosphodiesterase activity; go_function: 3 ;5prime-cyclic-nucleotide phosphodiesterase activity; go_process: signal transduction	phosphodiesterase 4B; cAMP-specific	423	TRUE	1:66030397-66031906	-4.68458	-4.75523	-4.59761	-0.15762	0.177004	0.0594113	2.97929	0.00325064	0.0257291	-2.79289	-3.05257	-2.53321	-0.519359	0.00307996
cg04582843	VAV2	9	135.847	7410	-	36.1	NCBI:RefSeq	CCTGGGACATCTGCGGCCGGAAGTTGATGTCCTTGAGGTCGATGGAGCCG	135847226	-		NM_003371.2	GI:40549447	oncogene VAV2; go_component: integral to membrane; go_function: metal ion binding; go_function: protein binding; go_function: diacylglycerol binding; go_function: rhodopsin-like receptor activity; go_function: guanyl-nucleotide exchange factor activity; go_process: intracellular signaling cascade; go_process: G-protein coupled receptor protein signaling pathway	vav 2 oncogene	161	TRUE	9:135845975-135848595	-5.31598	-5.40701	-5.20395	-0.203055	0.196629	0.058892	3.33881	0.00100523	0.0114065	-5.13586	-5.14185	-5.12988	-0.0119747	0.0346175
cg20268522	NCAM1	11	112.337	4684	+	36.1	NCBI:RefSeq	CGGAGAATGAGTGACAGTCCCAGCCTCAGCACACTCGCAACTCGGAGATC	112337368	+	CD56; NCAM; MSK39;	NM_000615.1	GI:10834989	isoform 1 is encoded by transcript variant 1; antigen recognized by monoclonal antibody 5.1H11; neural cell adhesion molecule; NCAM; go_component: membrane; go_component: plasma membrane; go_component: integral to membrane; go_function: protein binding; go_process: cell adhesion; go_process: cell adhesion; go_process: cell-cell signaling; go_process: cell differentiation; go_process: synaptic tra…	neural cell adhesion molecule 1 isoform 1	6	TRUE	11:112336978-112339768	-4.83352	-4.91877	-4.7286	-0.190164	0.18863	0.0446723	4.22253	3.68054e-05	0.0010299	-2.97058	-3.20833	-2.73284	-0.475493	2.36247e-07
cg26824467	LASS6	2	169.022	253782	+	36.1	NCBI:RefSeq	CGGATAAAAACCAAACAGCGACCAGAAGCCAGGAAGTCCCTGGCGAATTC	169021081	+		NM_203463.1	GI:45007001	go_component: nucleus; go_component: integral to membrane; go_function: transcription factor activity; go_process: lipid biosynthesis; go_process: regulation of transcription; DNA-dependent	longevity assurance homolog 6	860	TRUE	2:169020609-169022013	-5.09812	-5.1833	-4.99327	-0.190023	0.193386	0.0709819	2.72444	0.00701735	0.0431668	-5.88637	-6.04633	-5.72641	-0.319922	0.000528205
cg15877314	GNAI2	3	50.2489	2771	+	36.1	NCBI:RefSeq	GTCCTTGTCTGGGGATTCGAGCTGGGAATCAAGGATCCCAGTGCGGGACG	50248651	+	GIP; GNAI2B; H_LUCA15.1; H_LUCA16.1;	NM_002070.2	GI:49574535	WUGSC:H_LUCA16.1; match to P04899 (PID:g121023); GTP-binding regulatory protein Gi alpha-2 chain; WUGSC:H_LUCA15.1; go_function: GTP binding; go_function: nucleotide binding; go_function: GTPase activity; go_function: protein binding; go_function: signal transducer activity; go_process: signal transduction; go_process: signal transduction; go_process: signal transduction; go_process: response to …	guanine nucleotide binding protein (G protein); alpha inhibiting activity polypeptide 2	248	TRUE	3:50247648-50249014	-5.58328	-5.76647	-5.35781	-0.408666	0.434904	0.0992493	4.38193	1.90641e-05	0.000617336	-8.06054	-8.15374	-7.96735	-0.186383	0.0505296
cg20550520	ARHGAP5	14	31.615	394	+	36.1	NCBI:RefSeq	TAGGCTGGTAGTGGCGTGAACAGGGGTCTTTTGGGCCACCCTGAGACCCG	31616246	+	p190-B; RhoGAP5;	NM_001173.2	GI:71834860	isoform b is encoded by transcript variant 2; p105 RhoGAP; Rho GTPase-activating protein; p100 RasGAP-associated p105 protein; go_component: membrane; go_component: cytoplasm; go_function: GTP binding; go_function: catalytic activity; go_function: GTPase activity; go_function: SH2 domain binding; go_function: Rho GTPase activator activity; go_process: cell adhesion; go_process: Rho protein signal…	Rho GTPase activating protein 5 isoform b	1218	TRUE	14:31614904-31617330	-3.99732	-4.07957	-3.89608	-0.183489	0.189558	0.0627736	3.0197	0.00286353	0.0234584	-5.19221	-5.40718	-4.97724	-0.429938	0.00201247
cg06821120	RASSF1	3	50.3505	11186	-	36.1	NCBI:RefSeq	CGCCAGGCCTCTCTGCAGATTGCAAGTTCACCTGCCACTACCGCTGCCGC		-	123F2; RDA32; NORE2A; RASSF1A; REH3P21;	NT_022517.17	Ras association domain family 1 isoform A	isoform A is encoded by transcript variant A; Ras association domain family protein 1; tumor suppressor protein RDA32; pancreas-specific ras association domain family 1 protein; cardiac-specific ras association domain family 1 protein; WUGSC:H_LUCA12.5; go_component: microtubule; go_component: nucleus; go_function: metal ion binding; go_function: protein binding; go_function: protein binding; go_…			TRUE	3:50349160-50350983	-3.98188	-4.04254	-3.90722	-0.135316	0.147228	0.0397531	3.70355	0.000275679	0.004564	-3.52403	-3.60922	-3.43883	-0.170399	0.0093451
cg01888411	ABTB2	11	34.3349	25841	-	36.1	NCBI:RefSeq	TACCATTGGCGTTCTTGCCGCAGATGAGATGCTCATAGGGCTGCAAGACG	34335378	-	DKFZP586C1619;	NM_145804.1	GI:21956638	go_component: nucleus; go_component: nucleosome; go_function: DNA binding; go_function: protein binding; go_process: nucleosome assembly; go_process: regulation of cell growth; go_process: chromosome organization and biogenesis (sensu Eukaryota)	ankyrin repeat and BTB (POZ) domain containing 2	509	TRUE	11:34334683-34336681	-3.93043	-3.99123	-3.8556	-0.135626	0.140522	0.048122	2.92012	0.00390469	0.0292107	-4.29811	-4.40159	-4.19464	-0.206951	0.0142699
cg14147105	LOC93343	19	17.3921	93343	+	36.1	NCBI:RefSeq	GGCACAGGAAGTAGCCAGATTTCTGCGCGAAGCTCTTGCCAAAGCTGGCG	17391912	+		NM_138401.2	GI:51871119		hypothetical protein LOC93343	236	TRUE	19:17391317-17392695	-4.79881	-4.89534	-4.68001	-0.215329	0.236664	0.0532049	4.44816	1.44288e-05	0.000507101	-4.74917	-4.82028	-4.67806	-0.142221	0.00677145
cg20472433	TKT	3	53.2644	7086	-	36.1	NCBI:RefSeq	CGGAGGCTCCGAGTTAGTCAGCTACCCAAAGTTACACACAGGGAGATCTG	53264998	-	TKT1;	NM_001064.1	GI:4507520	go_function: calcium ion binding; go_function: transferase activity; go_function: transketolase activity	transketolase	558	TRUE	3:53264383-53265445	-4.89811	-5.00998	-4.76043	-0.249547	0.254686	0.0763411	3.33616	0.00101435	0.0114846	-5.21723	-5.2665	-5.16796	-0.0985443	0.0263157
cg23663476	LAT	16	28.9039	27040	+	36.1	NCBI:RefSeq	CGCAGGGGTAACTGGATCCCCCGACTTCAGCCCAGGCCCTGGTCTGACCA	28903648	+	LAT1; pp36;	NM_014387.3	GI:62739153	isoform a is encoded by transcript variant 1; 36 kDa phospho-tyrosine adaptor protein; go_component: membrane; go_component: lipid raft; go_component: integral to membrane; go_component: immunological synapse; go_function: protein binding; go_function: protein binding; go_function: SH3/SH2 adaptor activity; go_process: immune response; go_process: signal transduction; go_process: mast cell degran…	linker for activation of T cells isoform a	302	TRUE	16:28903790-28903997	-4.58401	-4.64965	-4.50323	-0.146416	0.149073	0.0512604	2.90815	0.00405084	0.0299451	-4.86993	-5.07156	-4.6683	-0.403268	1.69704e-05
cg01857260	SCRL	19	55.3584	126123	-	36.1	NCBI:RefSeq	TCTAGGTTCTAGAACCATGCCTGGCACATAGCAGGTGCTCAGCGAACACG	55358350	-	MGC33947; PLAL6978; PRO21961;	NM_152358.2	GI:63999116	synonyms: MGC33947; PLAL6978; PRO21961	hypothetical protein LOC126123	14	TRUE	19:55357951-55358839	-2.8435	-3.01006	-2.63851	-0.371553	0.363053	0.0749173	4.84605	2.53835e-06	0.000135083	-1.71383	-1.88081	-1.54685	-0.333959	0.0515503
cg24580526	CDK2AP1	12	122.323	8099	-	36.1	NCBI:RefSeq	TATTCTAATCCTGGGGCTTGGCCAGACCTGGGCGTCTGGAATGATCTACG	122322640	-	DOC1; ST19; DORC1; doc-1; p12DOC-1;	NM_004642.2	GI:17978492	Deleted in oral cancer-1; putative oral cancer suppressor; cyclin-dependent kinase 2-associated protein 1; go_component: nucleus; go_component: cytoplasm; go_function: DNA binding; go_function: signal transducer activity; go_process: cell cycle; go_process: DNA-dependent DNA replication; go_process: S phase of mitotic cell cycle; go_process: protein amino acid phosphorylation; go_process: negativ…	CDK2-associated protein 1	52	TRUE	12:122320742-122323076	-4.96238	-5.09644	-4.79738	-0.299062	0.294681	0.0805672	3.65758	0.000326334	0.00515008	-6.44409	-6.60548	-6.2827	-0.322787	0.00852256
cg08341874	VMO1	17	4.6364	284013	-	36.1	NCBI:RefSeq	ACAGAGGCCAAACTGATATAAATCTGCTTAGGAGGCCTGATTCACAGACG	4636467	-	ERGA6350; PRO21055; MGC125880; MGC125881;	NM_182566.1	GI:32698963	synonyms: ERGA6350; PRO21055; MGC125880; MGC125881	secretory protein LOC284013	72	TRUE	17:4634929-4636534	-4.71858	-4.91083	-4.48196	-0.428863	0.452365	0.0863091	5.24122	4.07117e-07	3.07127e-05	-3.8494	-4.28041	-3.4184	-0.862005	0.000551139
cg16703647	CRABP1	15	76.4196	1381	+	36.1	NCBI:RefSeq	CTGAGGCACAACTGGGCTGGGAGTTGAGCGCATACCGAGTAGGGGCTGCG	76419750	+	RBP5; CRABP; CRABPI; CRABP-I;	NM_004378.1	GI:4758051	cellular retinoic acid-binding protein 1; go_component: cytoplasm; go_function: lipid binding; go_function: retinal binding; go_process: transport; go_process: development; go_process: signal transduction	cellular retinoic acid binding protein 1	103	TRUE	15:76419520-76421296	-4.98223	-5.0652	-4.88012	-0.185073	0.202567	0.0523444	3.86989	0.000147761	0.00288176	-4.0878	-4.26682	-3.90878	-0.358037	0.0197937
cg05232067	BNIP3L	8	26.2968	665	+	36.1	NCBI:RefSeq	CGGGAGCTGTCAGTCACCTGGACATCCCATGCCTGAGCCAATGAGCTGCC	26296440	+	NIX; BNIP3a;	NM_004331.2	GI:47078259	BCL2/adenovirus E1B 19-kd protein-interacting protein 3a; adenovirus E1B19k-binding protein B5; go_component: membrane; go_component: integral to membrane; go_component: mitochondrial envelope; go_process: apoptosis; go_process: induction of apoptosis; go_process: negative regulation of survival gene product activity	BCL2/adenovirus E1B 19kD-interacting protein 3-like	365	TRUE	8:26296030-26297605	-4.54549	-4.63534	-4.43491	-0.200431	0.214545	0.0527139	4.06998	6.79038e-05	0.00161674	-4.82816	-4.93755	-4.71878	-0.218773	0.000854756
cg16334840	SCLY	2	238.634	51540	+	36.1	NCBI:RefSeq	CGCAGGAAAGATTAATTCAAGATCTGTTTAGGCCGTTAAATAGGAATTGG	238634419	+	SCL;	NM_016510.3	GI:39725671	go_component: cytosol; go_function: lyase activity; go_function: transaminase activity; go_function: selenocysteine lyase activity; go_process: metabolism; go_process: amino acid metabolism	selenocysteine lyase	736	TRUE	2:238633611-238635362	-4.80338	-4.93021	-4.64729	-0.282919	0.266519	0.0494025	5.39484	1.9455e-07	1.78078e-05	-4.97902	-5.10705	-4.851	-0.256045	1.17797e-06
cg13687831	MCM10	10	13.244	55388	+	36.1	NCBI:RefSeq	CACTGTCGTGCATTTGTTTACTACCTGCTCGTGCCTTTAAACTGTAAGCG	13243587	+	CNA43; PRO2249;	NM_018518.3	GI:33383234	isoform 2 is encoded by transcript variant 2; homolog of yeast MCM10; go_function: protein binding	minichromosome maintenance protein 10 isoform 2	422	TRUE	10:13243270-13244343	-6.30749	-6.47657	-6.0994	-0.377174	0.419368	0.107337	3.90704	0.000128185	0.00258821	-6.23755	-6.58881	-5.8863	-0.70251	5.73254e-06
cg16777839	PHPT1	9	138.864	29085	+	36.1	NCBI:RefSeq	ATTGGCTGAGGCGCTGGGCCTTGGGAAGCATTCCCCGACGGGATTGGTCG	138863367	+	PHP14; CGI-202; HSPC141; bA216L13.10; DKFZp564M173; RP11-216L13.10;	NM_014172.2	GI:24475860	1700008C22Rik; sex-regulated protein janus-a; go_component: cytosol; go_function: hydrolase activity; go_function: phosphoprotein phosphatase activity; go_function: phosphohistidine phosphatase activity; go_process: dephosphorylation	phosphohistidine phosphatase 1	256	TRUE	9:138857951-138864547	-4.87209	-4.99221	-4.72425	-0.267962	0.276379	0.0827744	3.33895	0.00100475	0.0114073	-7.97935	-8.23649	-7.7222	-0.514295	0.0304412
cg12526025	LARGE	22	32.6476	9215	-	36.1	NCBI:RefSeq	CGGGGCTCCTCACAGACTCCGGCTGCCCCACAGCATGCCCACCTCCGAGA	32646410	-	MDC1D; KIAA0609;	NM_004737.3	GI:59853527	acetylglucosaminyltransferase-like protein; go_component: Golgi stack; go_component: integral to membrane; go_component: integral to Golgi membrane; go_function: acetylglucosaminyltransferase activity; go_process: myelination; go_process: muscle maintenance; go_process: synaptic transmission; go_process: carbohydrate biosynthesis; go_process: sensory perception of sound; go_process: N-acetylgluco…	like-glycosyltransferase	1142	TRUE	22:32645462-32648712	-4.60072	-4.6812	-4.50168	-0.179522	0.171379	0.0604995	2.83273	0.00509256	0.0347865	-5.00404	-5.18913	-4.81895	-0.370186	0.00838016
cg00728317	MT1F	16	55.2495	4494	+	36.1	NCBI:RefSeq	AATACGACCTTCTCAAACCCAGGAACACTCTCTATGGTGTCTGGGAATCG	55249356	+	MT1; MGC32732;	NM_005949.1	GI:28866946	go_component: cytoplasm; go_function: zinc ion binding; go_function: metal ion binding; go_function: copper ion binding; go_function: cadmium ion binding; go_process: biological process unknown	metallothionein 1F	178	TRUE	16:55248970-55249632	-3.54378	-3.62137	-3.44828	-0.17309	0.180326	0.0595126	3.03004	0.0027715	0.0229787	-4.16791	-4.23366	-4.10217	-0.131483	0.0169655
cg18678421	LENG8	19	59.6512	114823	+	36.1	NCBI:RefSeq	AGGCTGAGGCATTGGACCAAATCCGTACATAGGCATTTCTCTGAACTGCG	59652213	+	pp13842; KIAA1932; MGC40108;	NM_052925.1	GI:24308381	go_function: receptor activity	leukocyte receptor cluster (LRC) member 8	973	TRUE	19:59651089-59653092	-4.69764	-4.79205	-4.58145	-0.210593	0.207774	0.0698918	2.9728	0.00331719	0.0260754	-4.99755	-5.16713	-4.82798	-0.339144	0.00267722
cg17260725	CCNB2	15	57.1846	9133	+	36.1	NCBI:RefSeq	CGGCCCTGCGCACGGGTCGCTGTTCTCATTGGCCAACACAAGATGCACTC	57184612	+	HsT17299;	NM_004701.2	GI:10938017	go_component: nucleus; go_function: protein binding; go_process: mitosis; go_process: cell cycle; go_process: cell division; go_process: regulation of progression through cell cycle	cyclin B2	32	TRUE	15:57184190-57185165	-5.63144	-5.75747	-5.47633	-0.281135	0.307737	0.100842	3.05168	0.00258775	0.0218869	-6.87887	-7.02403	-6.73372	-0.290312	0.0267053
cg18124330	C12orf5	12	4.30103	57103	+	36.1	NCBI:RefSeq	CGGTGCCAGACATGTCCACAGACTTGTCTGGGTACCGATTTTGCTCCCCA	4300632	+		NM_020375.1	GI:9966848	go_function: catalytic activity; go_process: metabolism	chromosome 12 open reading frame 5	403	TRUE	12:4300007-4301184	-5.13789	-5.22215	-5.03419	-0.187959	0.202617	0.0626114	3.2361	0.00142035	0.0146188	-5.64038	-5.71541	-5.56536	-0.150046	0.00117147
cg15816080	TPST1	7	65.3076	8460	+	36.1	NCBI:RefSeq	ACATCTGCTACGATTGGCTGAGCGGACGATGTGTCGGCTGCTCTGATTCG	65307749	+		NM_003596.2	GI:21361092	go_component: Golgi apparatus; go_component: integral to membrane; go_component: membrane fraction; go_function: transferase activity; go_function: protein-tyrosine sulfotransferase activity; go_process: inflammatory response; go_process: peptidyl-tyrosine sulfation	tyrosylprotein sulfotransferase 1	99	TRUE	7:65307371-65308570	-5.62506	-5.75641	-5.4634	-0.293003	0.275934	0.0949568	2.90588	0.00407907	0.0300782	-7.81856	-7.98346	-7.65367	-0.329792	0.000187747
cg04531710	EIF4G1	3	185.515	1981	+	36.1	NCBI:RefSeq	GGCCGCCGAGCGGGATCTGTGCGGGGAGCCGGAAATGGTTGTGGACTACG	185515050	+	p220; EIF4F; EIF4G; DKFZp686A1451;	NM_004953.2	GI:38201618	isoform 4 is encoded by transcript variant 5; EIF4-gamma; go_component: eukaryotic translation initiation factor 4F complex; go_function: RNA binding; go_function: protein binding; go_function: translation initiation factor activity; go_function: translation initiation factor activity; go_function: translation initiation factor activity; go_process: regulation of translational initiation; go_proc…	eukaryotic translation initiation factor 4 gamma; 1 isoform 4	56	TRUE	3:185514392-185515983	-5.92882	-6.03639	-5.79643	-0.239959	0.27934	0.0804876	3.4706	0.000637366	0.00835553	-10.812	-11.7472	-9.87692	-1.87024	1.49331e-06
cg23837897	COX11	17	50.4013	1353	-	36.1	NCBI:RefSeq	GTTTAAATAAAGATCACAGGCGCAACCCCAAGTGATGGCAAGCTTGCACG	50401053	-	COX11P;	NM_004375.2	GI:17921983	cytochrome c oxidase subunit 11; COX11 (yeast) homolog; cytochrome c oxidase assembly protein; cytochrome c oxidase assembly protein COX11; go_component: mitochondrion; go_component: integral to membrane; go_function: copper ion binding; go_function: cytochrome-c oxidase activity; go_function: electron transporter activity; go_process: respiratory gaseous exchange; go_process: cytochrome c oxidas…	COX11 homolog	216	TRUE	17:50400421-50401536	-5.04572	-5.18224	-4.87768	-0.304561	0.35113	0.0920027	3.81652	0.000180902	0.00334141	-5.58609	-5.64422	-5.52797	-0.116241	0.0417946
cg27555776	OPTN	10	13.1818	10133	+	36.1	NCBI:RefSeq	CGGGGAAGACGAACTCCGCACACTGCATTTGATTAATGATTTATTTTGAT	13182088	+	NRP; FIP2; HIP7; HYPL; GLC1E; TFIIIA-INTP;	NM_001008211.1	GI:56549106	glaucoma 1; open angle; E (adult-onset); nemo-related protein; tumor necrosis factor alpha-inducible cellular protein containing leucine zipper domains; transcrption factor IIIA-interacting protein; Huntingtin interacting protein L; go_component: Golgi stack	optineurin	250	TRUE	10:13181473-13182585	-5.39093	-5.49002	-5.26897	-0.221057	0.24315	0.0713351	3.40856	0.000791155	0.00964132	-5.82631	-5.89856	-5.75406	-0.144499	0.000724328
cg11932564	TNFRSF13C	22	40.6521	115650	-	36.1	NCBI:RefSeq	CTGGTCCTGGTGGGTCTGGTGAGCTGGAGGCGGCGACAGCGGCGGCTTCG	40652728	-	BAFFR; CD268; BAFF-R; MGC138235;	NM_052945.2	GI:17978517	B cell-activating factor receptor; go_component: membrane; go_component: integral to membrane; go_function: receptor activity; go_process: immune response	BAFF receptor	636	TRUE	22:40651868-40653225	-5.6741	-5.83245	-5.47921	-0.35324	0.350257	0.106697	3.28272	0.00121534	0.0130229	-5.9823	-6.09864	-5.86595	-0.23269	0.0144983
cg15884411	TMEM127	2	96.2961	55654	-	36.1	NCBI:RefSeq	CGTCAGCAGACAAGCTGAAATGTCAAGGGAATTGTGTTAGCTGCAGAGGC	96295459	-	FLJ20507; FLJ22257;	NM_017849.1	GI:8923465	synonyms: FLJ20507; FLJ22257	hypothetical protein LOC55654	671	TRUE	2:96294501-96296204	-5.54826	-5.62973	-5.44798	-0.181751	0.178797	0.0590227	3.02929	0.00277808	0.0229778	-5.90556	-6.00622	-5.8049	-0.201321	2.79142e-05
cg19639622	GPM6A	4	177.161	2823	-	36.1	NCBI:RefSeq	CGTGTGTGTCTGTAATGTGCATTCAATGTATTTAGGAGAGAGACTTTGCA	177160642	-	M6A; GPM6;	NM_201592.1	GI:42476104	isoform 3 is encoded by transcript variant 3; go_component: cell surface; go_component: integral to plasma membrane	glycoprotein M6A isoform 3	152	TRUE	4:177159313-177160797	-5.29117	-5.37292	-5.19057	-0.182345	0.196524	0.0580835	3.38347	0.000862715	0.0102762	-5.53662	-5.61552	-5.45771	-0.157806	0.022513
cg02479575	C19orf30	19	4.72065	284424	+	36.1	NCBI:RefSeq	CGGACAGCGCCTCTCGGGAGGTCCGAGAAGAGAACCGCGATCTGTTTCAG	4720152	+	PGSF1; PGSF1a; PGSF1b;	NM_174947.2	GI:29126235	pituitary gland specific factor 1a	hypothetical protein LOC284424	501	TRUE	19:4720438-4720853	-5.69527	-5.80752	-5.55712	-0.250401	0.246544	0.0725651	3.39756	0.000821817	0.00992106	-4.38424	-4.56307	-4.20542	-0.357643	3.96389e-06
cg03414321	HCK	20	30.1037	3055	+	36.1	NCBI:RefSeq	GTTAGGACACTTGGGGCGGAGTTAGCCTCGCTCAGGGCGCGGCTAAGGCG	30103718	+	JTK9;	NM_002110.2	GI:30795228	non-AUG (CUG) translation initiation codon; tyrosine protein kinase HCK; go_function: ATP binding; go_function: nucleotide binding; go_function: protein binding; go_function: protein binding; go_function: transferase activity; go_function: protein-tyrosine kinase activity; go_process: mesoderm development; go_process: intracellular signaling cascade; go_process: protein amino acid phosphorylation	hemopoietic cell kinase isoform p61HCK	35	TRUE	20:30102769-30104472	-4.44477	-4.64969	-4.19257	-0.457117	0.458071	0.116832	3.92077	0.000121597	0.00249928	-6.09425	-6.43292	-5.75559	-0.677332	0.00207138
cg14134005	GATA4	8	11.6005	2626	+	36.1	NCBI:RefSeq	GGAGTTTTTGCTCTCCTTCTGATCACTTGTCCCAGTTCACCCCAAATTCG		+	9606;	NT_077531.3	GATA binding protein 4	GATA-binding protein 4; go_component: nucleus; go_component: nucleus; go_component: nucleus; go_function: DNA binding; go_function: protein binding; go_function: zinc ion binding; go_function: metal ion binding; go_function: sequence-specific DNA binding; go_function: transcription factor activity; go_function: transcription factor activity; go_function: transcriptional activator activity; go_fun…			TRUE	8:11598711-11600557	-4.18356	-4.26857	-4.07892	-0.189642	0.205328	0.0441356	4.65221	5.99911e-06	0.000262318	-2.50012	-2.80274	-2.1975	-0.605234	0.0194934
cg23496260	BASP1	5	17.2711	10409	+	36.1	NCBI:RefSeq	CGGAGCCCTCACAGAGGGACCCCAGGCCCTTGCCGTCCAATCCGGGCCCA	17270750	+	CAP23; NAP22; CAP-23; NAP-22; MGC8555;	NM_006317.3	GI:30795230	brain acid-soluble protein 1; neuronal tissue-enriched acidic protein; neuronal axonal membrane protein NAP-22; go_component: cytoskeleton; go_component: plasma membrane	brain abundant; membrane attached signal protein 1	339	TRUE	5:17269236-17272496	-4.12498	-4.23373	-3.99114	-0.242588	0.227454	0.0699369	3.25227	0.00134587	0.0139991	-3.52458	-3.65284	-3.39632	-0.256525	0.000506164
cg16419345	ACOX1	17	71.4877	51	-	36.1	NCBI:RefSeq	CGGTGATGGCGAAAGCAAAGAAGTCTGGATTCCAAGACCTCTAGTAACTG	71487020	-	ACOX; MGC1198; PALMCOX;	NM_004035.4	GI:34304338	isoform a is encoded by transcript variant 1; go_component: peroxisome; go_function: electron donor activity; go_function: oxidoreductase activity; go_function: acyl-CoA oxidase activity; go_function: acyl-CoA dehydrogenase activity; go_process: electron transport; go_process: lipid metabolism; go_process: fatty acid beta-oxidation; go_process: prostaglandin metabolism	acyl-Coenzyme A oxidase isoform a	664	TRUE	17:71486434-71487857	-4.33326	-4.41444	-4.23335	-0.181098	0.17141	0.0639656	2.67972	0.0079886	0.0468733	-4.5035	-4.64492	-4.36207	-0.282852	1.361e-05
cg10949322	CUL2	10	35.4192	8453	-	36.1	NCBI:RefSeq	GGGAGGCGGCCTCGGCGCACAGTAATGGCAGCGCTGTGAGCAGGGGAACG	35419300	-		NM_003591.2	GI:19482173	go_function: protein binding; go_process: cell cycle; go_process: ubiquitin cycle; go_process: cell cycle arrest; go_process: G1/S transition of mitotic cell cycle; go_process: negative regulation of cell proliferation; go_process: induction of apoptosis by intracellular signals	cullin 2	64	TRUE	10:35418668-35419784	-4.9046	-4.98372	-4.80721	-0.176512	0.191799	0.0672735	2.85104	0.00481945	0.03351	-5.4742	-5.53629	-5.4121	-0.12419	0.0444512
cg21869532	ZNF561	19	9.59302	93134	-	36.1	NCBI:RefSeq	TTTCAGCCACGTAGGACCGGGTAGAACACAGAAATTCTAGTTTCCTCTCG	9592899	-	MGC45408;	NM_152289.1	GI:22748660	go_component: nucleus; go_function: zinc ion binding; go_function: metal ion binding; go_function: nucleic acid binding	zinc finger protein 561	125	TRUE	19:9592551-9593404	-3.36548	-3.45812	-3.25147	-0.206646	0.220405	0.0438284	5.02882	1.10255e-06	6.79853e-05	-3.15244	-3.32115	-2.98373	-0.337415	2.05794e-05
cg14495243	CCDC59	12	81.2761	29080	-	36.1	NCBI:RefSeq	ACTTAGCAAGCCTGAGGATTTGCAAATGGTTGCCTTCTTACATACCCTCG	81276303	-	HSPC128; FLJ10294;	NM_014167.1	GI:7661789	HSPC128 protein	hypothetical protein LOC29080	167	TRUE	12:81275953-81277038	-4.69225	-4.74872	-4.62276	-0.125964	0.162082	0.0560629	2.89108	0.00426792	0.0309826	-4.86102	-5.00298	-4.71907	-0.283909	0.00211152
cg24970539	RPS6KA4	11	63.883	8986	+	36.1	NCBI:RefSeq	CAGATTCCTGGCTTGGGGACTAATGCCCCAGAGGCTCCAGGTTACCCACG	63883201	+	MSK2; RSK-B;	NM_001006944.1	GI:55743137	isoform b is encoded by transcript variant 2; ribosomal protein S6 kinase; 90kD; polypeptide 4; ribosomal protein kinase B; mitogen- and stress-activated protein kinase 2; ribosomal protein S6 kinase alpha 4; go_component: nucleus; go_component: nucleus; go_component: nucleus; go_function: ATP binding; go_function: ATP binding; go_function: ATP binding; go_function: nucleotide binding; go_functio…	ribosomal protein S6 kinase; 90kDa; polypeptide 4 isoform b	233	TRUE	11:63882917-63883513	-3.82633	-3.89922	-3.73661	-0.162609	0.168439	0.0479872	3.51008	0.000554582	0.00753404	-3.93434	-3.98506	-3.88361	-0.101454	8.5122e-05
cg23758485	SMPD3	16	67.0397	55512	-	36.1	NCBI:RefSeq	CGCCTCGGTTCGCCCGCTCCCCAAGAAAACAAAAGCGAATTCAGCAGCAC	67039905	-	NSMASE2; FLJ22593;	NM_018667.2	GI:46358429	go_component: Golgi stack; go_component: membrane fraction; go_component: integral to membrane; go_function: hydrolase activity; go_function: magnesium ion binding; go_function: sphingomyelin phosphodiesterase activity; go_process: cell cycle; go_process: development; go_process: sphingomyelin catabolism	sphingomyelin phosphodiesterase 3; neutral membrane	202	TRUE	16:67039271-67040730	-4.14258	-4.26997	-3.9858	-0.28417	0.308104	0.09016	3.41731	0.000767559	0.00948853	-3.23656	-3.41797	-3.05514	-0.36283	0.000426292
cg20426860	FLJ20422	19	19.1098	54929	-	36.1	NCBI:RefSeq	CGCTCCTGCAGGACCCCCGTCCCCAGAGTGGACCCCCAACAGGACCCCAC	19110267	-		NM_017814.1	GI:8923393		hypothetical protein LOC54929	428	TRUE	19:19109654-19109860	-2.63906	-2.73079	-2.52617	-0.204615	0.248269	0.0755117	3.28782	0.00119468	0.012855	-3.2958	-3.51058	-3.08102	-0.429563	4.42684e-05
cg17079378	RAD54L	1	46.486	8438	+	36.1	NCBI:RefSeq	TTCGATTGACCCGGTCTTGGCGGGTCGGTGAGTCTTGGCGGCTGTTAACG	46486004	+	HR54; hHR54; RAD54A; hRAD54;	NM_003579.2	GI:19924136	RAD54 (S.cerevisiae)-like; RAD54 homolog; go_component: nucleus; go_function: ATP binding; go_function: DNA binding; go_function: helicase activity; go_function: hydrolase activity; go_function: nucleotide binding; go_process: meiosis; go_process: DNA repair; go_process: DNA recombination	RAD54-like protein	23	TRUE	1:46485096-46486482	-6.51968	-6.64021	-6.37134	-0.268868	0.269972	0.100796	2.6784	0.00801909	0.047012	-7.78734	-7.95831	-7.61637	-0.341937	0.00589338
cg07071881	FBXO7	22	31.2011	25793	+	36.1	NCBI:RefSeq	CGGGCCGCCCAGCCCCGGCCCCAGCGTACCTGTACCCCCAGGTGCACAGC	31200707	+	FBX; FBX7; FBX07; DKFZp686B08113;	NM_012179.3	GI:74229026	isoform 1 is encoded by transcript variant 1; F-box only protein 7; go_component: ubiquitin ligase complex; go_function: ubiquitin-protein ligase activity; go_process: ubiquitin cycle; go_process: ubiquitin-dependent protein catabolism	F-box only protein 7 isoform 1	432	TRUE	22:31200044-31201506	-4.77189	-4.91327	-4.59789	-0.315375	0.29632	0.0999883	2.96355	0.00341407	0.0265331	-4.24948	-4.42333	-4.07564	-0.347682	3.17685e-06
cg21518938	RBBP8	18	18.767	5932	+	36.1	NCBI:RefSeq	TGCAAAATGCTTAAGCTAGACACAGTGTACAGATAACTTTCACAGAACCG	18767293	+	RIM; CTIP;	NM_002894.2	GI:42718012	isoform a is encoded by transcript variant 1; retinoblastoma-binding protein 8; CTBP-interacting protein; retinoblastoma-interacting myosin-like	retinoblastoma binding protein 8 isoform a	244	TRUE	18:18766926-18768043	-5.98894	-6.08768	-5.86742	-0.220254	0.243247	0.0825515	2.9466	0.00359834	0.0275596	-6.27586	-6.46679	-6.08494	-0.381851	0.000203259
cg17057965	FBXO28	1	222.368	23219	+	36.1	NCBI:RefSeq	CGGCGGCCAAGGCGACGGCGGTTCCTCTTTGGCCTCCGGCTCTACCCAGC	222368436	+	Fbx28; FLJ10766; KIAA0483;	NM_015176.1	GI:7662157	go_process: ubiquitin cycle	F-box protein 28	60	TRUE	1:222368316-222369404	-4.7943	-4.9377	-4.61781	-0.319889	0.28198	0.0727341	3.87686	0.000143887	0.00283033	-4.46681	-4.54279	-4.39083	-0.151964	3.41192e-05
cg20209009	TBX21	17	43.1663	30009	+	36.1	NCBI:RefSeq	CAGCACCAGACAGAGATGATCATCACCAAGCAGGGACGGTGAGTGCGGCG	43165609	+	T-PET; T-bet; TBLYM;	NM_013351.1	GI:7019548	T-box expressed in T cells; T-cell-specific T-box transcription factor; go_component: nucleus; go_function: transcription factor activity; go_process: transcription; go_process: development; go_process: regulation of transcription; DNA-dependent	T-box 21	712	TRUE	17:43165308-43166553	-5.04003	-5.12725	-4.93267	-0.194583	0.195745	0.0625348	3.13018	0.0020112	0.0185493	-4.99272	-5.67415	-4.31129	-1.36287	5.90212e-12
cg07068998	NRAS	1	115.061	4893	-	36.1	NCBI:RefSeq	TGTTTACAAAGATAAACGGCCTCTTTACCCAGAGATCAAAACCTCAAACG	115061038	-	N-ras; NRAS1;	NM_002524.2	GI:6006027	v-ras neuroblastoma RAS viral oncogene homolog; N-ras protein part 4; go_component: membrane; go_component: Golgi stack; go_function: GTP binding; go_function: GTPase activity; go_function: nucleotide binding; go_process: small GTPase mediated signal transduction; go_process: regulation of progression through cell cycle	neuroblastoma RAS viral (v-ras) oncogene homolog	153	FALSE		-4.61258	-4.69103	-4.51601	-0.175018	0.181675	0.0491861	3.69361	0.000285958	0.00470768	-3.87736	-4.0291	-3.72562	-0.303482	0.0129651
cg21460081	HOXB4	17	44.011	3214	-	36.1	NCBI:RefSeq	CGCGCGCAGGTTGCGACTGGAGGGCCTGTTGGGGCGCTAGGCAGAGCGCA	44010742	-	HOX2; HOX2F; HOX-2.6;	NM_024015.3	GI:45580720	homeobox protein Hox-B4; homeo box 2F; go_component: nucleus; go_function: transcription factor activity; go_process: development; go_process: regulation of transcription; DNA-dependent	homeo box B4	269	TRUE	17:44009922-44011032	-5.10616	-5.21016	-4.97815	-0.232005	0.252952	0.0781537	3.2366	0.00141803	0.0146094	-4.79836	-4.87675	-4.71998	-0.156771	0.00966133
cg13467814	C2orf30	2	53.8669	27248	+	36.1	NCBI:RefSeq	CGCCAGATGAATGTGTGTGTTTATGAACTAAGTCACGTCTGACTGCATCC	53867721	+	CL24936; CL25084; XTP3TPB;	NM_015701.2	GI:20070263	XTP3-transactivated protein B	chromosome 2 open reading frame 30	822	TRUE	2:53866897-53868247	-5.33243	-5.46269	-5.1721	-0.290583	0.29515	0.105936	2.78612	0.00585298	0.0382795	-7.51492	-7.76427	-7.26558	-0.498695	0.0398225
cg14407437	FABP3	1	31.6185	2170	-	36.1	NCBI:RefSeq	CCTCATGTGATGCGAGGGCTATTTAAAGCGGCAGCCCGGGCAGGGAGCCG	31618510	-	MDGI; FABP11; H-FABP; O-FABP;	NM_004102.3	GI:62865867	mammary-derived growth inhibitor; Fatty acid-binding protein 3; muscle; fatty acid binding protein 11; go_component: cytoplasm; go_component: soluble fraction; go_function: fatty acid binding; go_function: lipid transporter activity; go_process: transport; go_process: negative regulation of cell proliferation	fatty acid binding protein 3	0	TRUE	1:31618359-31618657	-4.84529	-5.01163	-4.64058	-0.371049	0.30339	0.094255	3.21882	0.00150419	0.015208	-3.94079	-4.05202	-3.82957	-0.222446	0.00313764
cg12497851	TBC1D14	4	6.96183	57533	+	36.1	NCBI:RefSeq	CGGTGCCTGGCGCTGTAGTTCCCAAACTGGTCTGCACTTTAGTATTGCCT	6962473	+	KIAA1322;	NM_020773.1	GI:29789113	go_function: GTPase activator activity	TBC1 domain family; member 14	646	TRUE	4:6961549-6963132	-4.69422	-4.78475	-4.5828	-0.201949	0.208179	0.0542759	3.83557	0.000168335	0.00317187	-4.04105	-4.2376	-3.8445	-0.393102	7.62938e-10
cg26624118	SLC43A1	11	57.04	8501	-	36.1	NCBI:RefSeq	CTGTATCCTTGTTCAAAACAAAGTGCGATTCGGCTGAAGCCGACTGACCG	57039735	-	LAT3; PB39; POV1; R00504;	NM_003627.4	GI:42476323	prostate cancer overexpressed gene 1; L-type amino acid transporter 3; go_component: integral to plasma membrane; go_function: neutral amino acid transporter activity; go_process: transport; go_process: neutral amino acid transport	solute carrier family 43; member 1	291	TRUE	11:57038651-57040203	-4.8862	-5.01256	-4.73068	-0.28188	0.262939	0.0630199	4.17232	4.51094e-05	0.0011972	-4.79041	-4.85502	-4.7258	-0.129218	0.0169655
cg12107692	BCL2L12	19	54.8598	83596	+	36.1	NCBI:RefSeq	CGCCCTCCAGTTGCCCCAGGTCCAGCTGCGACACCAGCCAGGGCAGGATC	54860211	+	MGC120313; MGC120314; MGC120315;	NM_138639.1	GI:20336329	isoform 1 is encoded by transcript variant 1; Bcl-2 related proline-rich protein; BCL2-like 12; isoform 1; go_process: apoptosis	BCL2-like 12 isoform 1	373	TRUE	19:54859166-54860141	-4.7292	-4.7954	-4.64773	-0.147668	0.195887	0.0753881	2.59838	0.0100708	0.0547253	-5.88206	-5.92254	-5.84157	-0.080965	0.0475687
cg19868691	WNT10A	2	219.453	80326	+	36.1	NCBI:RefSeq	TAAATAAACTATCTCAACGGCCACTTCTAGGGTTAAAAGTCTCTCTAACG	219453499	+	FLJ14301;	NM_025216.2	GI:16936519	go_component: extracellular region; go_function: signal transducer activity; go_process: development; go_process: frizzled-2 signaling pathway	wingless-type MMTV integration site family; member 10A precursor	658	TRUE	2:219452627-219452965	-3.71373	-3.84128	-3.55675	-0.284524	0.293141	0.0605263	4.84321	2.57107e-06	0.000136121	-3.30306	-3.4922	-3.11392	-0.378281	0.0289381
cg03939485	RGL2	6	33.3741	5863	-	36.1	NCBI:RefSeq	GGTTCCTGCGGGCAGGTCCTGAGTCACACTGACAGAGAACCACGGAGACG	33374716	-	KE1.5; RAB2L; HKE1.5;	NM_004761.2	GI:21361071	RAB2; member RAS oncogene family-like; GDS-related protein; go_component: cellular component unknown; go_function: guanyl-nucleotide exchange factor activity; go_function: guanyl-nucleotide exchange factor activity; go_function: Ras guanyl-nucleotide exchange factor activity; go_process: signal transduction; go_process: Ras protein signal transduction; go_process: small GTPase mediated signal tra…	ral guanine nucleotide dissociation stimulator-like 2	662	TRUE	6:33374004-33374402	-4.22986	-4.31422	-4.12603	-0.188186	0.205908	0.0753368	2.73317	0.00684081	0.0423591	-4.67085	-4.75545	-4.58626	-0.169195	0.015203
cg07791997	PPME1	11	73.5602	51400	+	36.1	NCBI:RefSeq	CGGCAGCGGGGGCAGTCAGAGCGGAGCCAAGATGCGAATGGGGTACGTGA	73560016	+	PME-1;	NM_016147.1	GI:7706644	go_function: hydrolase activity; go_function: serine esterase activity; go_function: protein phosphatase inhibitor activity; go_process: aromatic compound metabolism; go_process: protein amino acid demethylation	protein phosphatase methylesterase-1	158	TRUE	11:73559258-73560445	-3.88491	-3.9737	-3.77564	-0.198059	0.19031	0.0397519	4.78744	3.30113e-06	0.000167044	-3.63062	-3.83235	-3.42889	-0.403459	4.99405e-08
cg08081407	ARF4	3	57.5587	378	-	36.1	NCBI:RefSeq	CGCCAAGTGATTCTGAAGATCTCTAATTCTGTCAAGGCGAGAGCGCTCCA	57558118	-		NM_001660.2	GI:6995998	go_component: Golgi stack; go_function: GTP binding; go_function: nucleotide binding; go_function: GTPase activity; go_function: enzyme activator activity; go_process: protein transport; go_process: ER to Golgi transport; go_process: small GTPase mediated signal transduction	ADP-ribosylation factor 4	615	TRUE	3:57557573-57558836	-3.16559	-3.22577	-3.09152	-0.134253	0.134715	0.0475814	2.83125	0.0051153	0.0348955	-3.39725	-3.49618	-3.29832	-0.197853	0.000158174
cg27573806	LSM2	6	31.8829	57819	-	36.1	NCBI:RefSeq	CGCTGTAGATGGCAGGATTCTGGAAAAGAACAAAATCCTTTGAGCTCAGG	31882722	-	G7b; snRNP; C6orf28; YBL026W;	NM_021177.3	GI:34013512	U6 snRNA-associated Sm-like protein; go_component: nucleus; go_component: small nucleolar ribonucleoprotein complex; go_function: RNA binding; go_function: protein binding; go_function: U6 snRNA binding; go_process: nuclear mRNA splicing; via spliceosome	LSM2 homolog; U6 small nuclear RNA associated	168	TRUE	6:31882327-31882980	-5.11982	-5.22837	-4.98621	-0.242158	0.258675	0.0785155	3.29457	0.00116781	0.0126252	-7.25736	-7.45225	-7.06246	-0.389796	0.0169655
cg22632663	RNF41	12	54.9022	10193	-	36.1	NCBI:RefSeq	CGGGAAGAACATAGAGTTCTCCCTCCTAAATGGCTACATAGTCCTGGCTG	54902002	-	NRDP1; SBBI03; MGC45228;	NM_005785.2	GI:37588857	isoform 1 is encoded by transcript variant 1; neuregulin receptor degradation protein-1; go_function: zinc ion binding; go_function: protein binding	ring finger protein 41 isoform 1	197	TRUE	12:54902156-54902450	-2.96752	-3.01514	-2.90892	-0.106228	0.0963992	0.0356006	2.7078	0.00736569	0.0444727	-2.74646	-2.79097	-2.70195	-0.0890178	9.20364e-07
cg20696985	SHF	15	43.2677	90525	-	36.1	NCBI:RefSeq	CAGAGGATGCGACTACTGGACTGAGGTTGAATCCTTTACGTGTCGCCACG	43267456	-		NM_138356.1	GI:46195760	go_process: intracellular signaling cascade	hypothetical protein LOC90525	265	TRUE	15:43266736-43268707	-4.9343	-5.02595	-4.82149	-0.204461	0.227588	0.0684408	3.32533	0.00105238	0.0118178	-5.36278	-5.42012	-5.30544	-0.114681	0.0190505
cg06654447	MGC14141	9	138.806	85014	+	36.1	NCBI:RefSeq	GAGTGGCGGAGGCTGGGGGCACTCTCTTGCTAAGGGGCTCAGGGCGTCCG	138805628	+		NM_032928.2	GI:39725661	RP11-216L13.7	hypothetical protein LOC85014	212	TRUE	9:138804922-138805896	-5.57312	-5.67383	-5.44917	-0.224667	0.229219	0.0740382	3.09596	0.00224613	0.0198536	-5.24682	-5.35775	-5.13588	-0.221874	0.0163164
cg13342625	EBNA1BP2	1	43.4107	10969	-	36.1	NCBI:RefSeq	CGCATGTATCCAGAGGCGCTACCTGTAGGGATCCTAAGCAACCCGGACAC	43410518	-	P40; EBP2; NOBP;	NM_006824.1	GI:5803110	nucleolar protein p40; homolog of yeast EBNA1-binding protein; nuclear FGF3 binding protein; EBNA1-binding protein 2; go_component: nucleus; go_component: membrane fraction; go_process: ribosome biogenesis	EBNA1 binding protein 2	163	TRUE	1:43409690-43411141	-5.77881	-5.93934	-5.58123	-0.358103	0.399472	0.100828	3.96193	0.000103713	0.00222962	-7.66192	-7.84583	-7.47802	-0.36781	0.00464171
cg27215108	CD63	12	54.4095	967	-	36.1	NCBI:RefSeq	CGGTAGGATGGGGAAACCTCACAGACCACATTGTCACCCGGCCTCAGCTC	54409076	-	MLA1; ME491; LAMP-3; OMA81H; TSPAN30;	NM_001780.3	GI:34328936	melanoma 1 antigen; ocular melanoma-associated antigen; melanoma-associated antigen ME491; lysosome-associated membrane glycoprotein 3; granulophysin; melanoma-associated antigen MLA1; go_component: plasma membrane; go_component: plasma membrane; go_component: integral to membrane; go_component: lysosomal membrane; go_component: integral to plasma membrane	CD63 antigen	414	TRUE	12:54408271-54409536	-4.60506	-4.73163	-4.44928	-0.282349	0.288162	0.0539994	5.33639	2.58107e-07	2.16086e-05	-4.42678	-4.50855	-4.345	-0.163543	0.0011833
cg00571634	WDR5B	3	123.618	54554	-	36.1	NCBI:RefSeq	CGGATTTCAGAAGCTAAAAGCCTACGAAGCCACCGAAACTGGAAACTCTG	123617572	-	FLJ11287; MGC49879;	NM_019069.3	GI:42544246	go_component: heterotrimeric G-protein complex; go_function: signal transducer activity; go_process: G-protein coupled receptor protein signaling pathway	WD repeat domain 5B	62	TRUE	3:123617271-123618068	-2.17225	-2.25431	-2.07126	-0.183046	0.209721	0.0673715	3.11291	0.00212675	0.0191687	-2.87069	-3.01052	-2.73086	-0.279656	1.98037e-05
cg21682826	HERPUD1	16	55.5233	9709	+	36.1	NCBI:RefSeq	CGCAGGTCTCAGACCAAGCTCCCCGCGCGGCCTGCAGCGCACCCAAACAT	55523249	+	SUP; HERP; Mif1; KIAA0025;	NM_014685.2	GI:58530855	isoform 1 is encoded by transcript variant 1; MMS-inducible gene; methyl methanesulfonate (MMF)-inducible fragment protein 1; go_component: integral to membrane; go_component: endoplasmic reticulum membrane; go_function: molecular function unknown; go_process: protein modification; go_process: response to unfolded protein; go_process: response to unfolded protein	homocysteine-inducible; endoplasmic reticulum stress-inducible; ubiquitin-like domain member 1 isoform 1	19	TRUE	16:55523153-55524167	-5.09461	-5.21606	-4.94512	-0.270941	0.259458	0.0992748	2.61354	0.00964938	0.0530793	-5.92008	-6.03456	-5.80561	-0.228945	0.0123531
cg00627286	UGDH	4	39.2057	7358	-	36.1	NCBI:RefSeq	CGCAGCCCCGCCCAGCGCCGCTCGCGGTAGGGGCGGAGCCGCTGAGCTGG	39205606	-	GDH; UGD; UDPGDH; UDP-GlcDH;	NM_003359.2	GI:63053519	UDP-glucose 6-dehydrogenase; uridine diphospho-glucose dehydrogenase; go_function: oxidoreductase activity; go_function: electron transporter activity; go_function: UDP-glucose 6-dehydrogenase activity; go_process: electron transport; go_process: UDP-glucose metabolism; go_process: UDP-glucuronate biosynthesis; go_process: glycosaminoglycan biosynthesis	UDP-glucose dehydrogenase	139	TRUE	4:39204770-39206279	-3.88585	-3.97448	-3.77677	-0.197709	0.225519	0.0688871	3.27374	0.00125254	0.0132627	-3.69064	-3.87068	-3.5106	-0.360084	2.38197e-09
cg04780629	RNF43	17	53.85	54894	-	36.1	NCBI:RefSeq	TTGTAATTGGTGTTCTAGCTCTGACTCCCTCCCCTGGGACTGCAATCACG	53849893	-	URCC; RNF124; FLJ20315; MGC125630; DKFZp781H0392; DKFZp781H02126;	NM_017763.3	GI:56711321	go_function: protein binding; go_function: zinc ion binding; go_function: metal ion binding; go_process: ubiquitin cycle	ring finger protein 43	70	FALSE		-5.04365	-5.18866	-4.86516	-0.323504	0.378874	0.0954897	3.96769	0.000101419	0.00218716	-6.4607	-6.70761	-6.21378	-0.493831	0.0189049
cg06782692	STK32C	10	133.971	282974	-	36.1	NCBI:RefSeq	CGGGGCATGGCCGGCCGGCAGGGCCGGGAGCGGCAGTGGTAGCGGGAGCG	133971467	-	PKE; YANK3; MGC23665; RP11-140A10.1;	NM_173575.2	GI:32455268	PKE protein kinase; protein kinase (PKE); go_function: ATP binding; go_function: nucleotide binding; go_function: transferase activity; go_function: protein-tyrosine kinase activity; go_function: protein serine/threonine kinase activity; go_process: protein amino acid phosphorylation	serine/threonine kinase 32C	58	TRUE	10:133970400-133972595	-4.41283	-4.52215	-4.27828	-0.243876	0.273156	0.082266	3.32039	0.00107015	0.0119587	-5.00058	-5.07361	-4.92755	-0.146055	0.0498586
cg23723933	AKAP9	7	91.4078	10142	+	36.1	NCBI:RefSeq	AAACTAACACACCTAATGGTGAAATTGGCGAACACCTACAAGCTCCAACG	91408128	+	PRKA9; CG-NAP; YOTIAO; AKAP350; AKAP450; HYPERION; KIAA0803; MU-RMS-40.16A;	NM_005751.3	GI:22538386	centrosomal isoform 2 is encoded by transcript variant 2; A-kinase anchoring protein 450; AKAP120-like protein; centrosome- and golgi-localized protein; kinase N-associated protein; protein kinase A anchoring protein 9; A-kinase anchor protein; 350kDa; go_component: centrosome; go_component: cytoskeleton; go_function: receptor binding; go_process: transport; go_process: signal transduction; go_pr…	A-kinase anchor protein 9 isoform 2	369	TRUE	7:91407743-91408428	-4.70956	-4.78068	-4.62201	-0.158668	0.166689	0.0532788	3.12862	0.00202136	0.0186181	-5.08179	-5.17515	-4.98844	-0.186716	0.000386702
cg25927124	PRKAR2A	3	48.8599	5576	-	36.1	NCBI:RefSeq	GGCCCAGGCTCTGGCGTGGGGTGGCGGCGGGCAGGACTGAGGCTGGGGCG	48860274	-	PKR2; PRKAR2; MGC3606;	NM_004157.2	GI:47157329	protein kinase A; RII-alpha subunit; cAMP-dependent protein kinase regulatory subunit RII alpha; go_component: cytoplasm; go_component: plasma membrane; go_component: membrane fraction; go_component: cAMP-dependent protein kinase complex; go_function: kinase activity; go_function: 3 ;5prime-cAMP binding; go_function: nucleotide binding; go_function: cAMP-dependent protein kinase regulator activit…	cAMP-dependent protein kinase; regulatory subunit alpha 2	373	TRUE	3:48859383-48860564	-6.01055	-6.13735	-5.85448	-0.28287	0.278922	0.0839564	3.32222	0.00106355	0.0119042	-7.14541	-7.32716	-6.96365	-0.36351	0.0287287
cg05727959	C12orf48	12	101.038	55010	+	36.1	NCBI:RefSeq	CACAGCCTGAATCACCACTTAAAAATGCGACAGGGCAGGTAGGGCAGACG	101038155	+	FLJ20641;	NM_017915.1	GI:8923595	synonym: FLJ20641	hypothetical protein LOC55010	50	TRUE	12:101037557-101038490	-5.89171	-5.98662	-5.7749	-0.211719	0.253765	0.0783035	3.24079	0.00139838	0.0144432	-7.20754	-7.40766	-7.00741	-0.400255	0.000167507
cg26805528	CRAT	9	130.912	1384	-	36.1	NCBI:RefSeq	CGACCCAGGAAAGACAAGGGGGACCCCGGCTTCAGTTAGCACCCCCACCC	130912904	-	CAT1;	NM_000755.2	GI:21618330	isoform 1 precursor is encoded by transcript variant 1; go_component: mitochondrion; go_component: peroxisome; go_component: endoplasmic reticulum; go_function: transferase activity; go_function: acyltransferase activity; go_function: carnitine O-acetyltransferase activity; go_process: transport; go_process: lipid metabolism; go_process: acyl-CoA metabolism; go_process: energy derivation by oxida…	carnitine acetyltransferase isoform 1 precursor	541	TRUE	9:130912306-130914369	-2.04164	-2.11904	-1.94637	-0.172671	0.172812	0.0321905	5.36842	2.21127e-07	1.95456e-05	-1.64229	-1.78701	-1.49756	-0.28945	1.4026e-09
cg04096365	IFI30	19	18.1455	10437	+	36.1	NCBI:RefSeq	CGAGGCCATTGGGCCCCTTGGCAATCAGCCCTGCCCAGGCACGTGAGCCC	18145579	+	GILT; IP30; IFI-30; MGC32056;	NM_006332.3	GI:29826337	gamma-interferon-inducible lysosomal thiol reductase; go_component: lysosome; go_component: extracellular region; go_function: oxidoreductase activity; go_process: immune response	interferon; gamma-inducible protein 30 preproprotein	129	TRUE	19:18145437-18146156	-5.14531	-5.24978	-5.01673	-0.233057	0.274188	0.067908	4.03764	7.71521e-05	0.00177536	-5.57412	-5.65454	-5.49369	-0.160853	0.00337836
cg24794433	DAB2IP	9	123.502	153090	+	36.1	NCBI:RefSeq	CGGCCAAACCCGGCCGAAAATGCCTTTTGTATCTGATACCCAGGGGCTCC	123501470	+	AIP1; AF9Q34; DIP1/2; KIAA1743;	NM_032552.1	GI:20070108	isoform 1 is encoded by transcript variant 1; nGAP-like protein; DOC-2/DAB2 interactive protein; ASK-interacting protein; go_function: GTPase activator activity	DAB2 interacting protein isoform 1	523	TRUE	9:123500662-123502056	-4.67329	-4.78386	-4.53721	-0.246647	0.227321	0.0794186	2.86231	0.0046579	0.0327181	-5.32748	-5.35514	-5.29982	-0.0553228	0.0210354
cg25346972	C14orf112	14	69.896	51241	-	36.1	NCBI:RefSeq	ACCAACATGGGGACTCCATAGCCGAGAGTCTTGTTCTTGCGAAAAGCACG	69896147	-	HSPC203;	NM_016468.3	GI:34147218	synonym: HSPC203	hypothetical protein LOC51241	112	TRUE	14:69895631-69896836	-5.76279	-5.85778	-5.64588	-0.211902	0.232338	0.0664707	3.49534	0.000584235	0.00782844	-5.95222	-6.00498	-5.89946	-0.105522	0.0193448
cg25549459	POU3F3	2	104.838	5455	+	36.1	NCBI:RefSeq	CTCAGGAACACATTTCACTCGTTTTCCCTTAGAGTAGTAAAACTTTTTCG	104838401	+	BRN1; OTF8;	NM_006236.1	GI:5453935	go_component: nucleus; go_function: transcription factor activity; go_process: central nervous system development; go_process: regulation of transcription; DNA-dependent	POU domain; class 3; transcription factor 3	717	TRUE	2:104835039-104840521	-4.63594	-4.70246	-4.55407	-0.148388	0.172251	0.056064	3.0724	0.00242228	0.0209345	-3.55845	-3.84864	-3.26827	-0.580365	0.00574066
cg11371791	FAM18B2	17	15.4074	201158	-	36.1	NCBI:RefSeq	CGGGCTCCAGTCCCACGGAACCTGCAGAGCCAGTCCCAGGAGCCGCCACC	15407570	-	MGC8763;	NM_145301.1	GI:21945057	go_component: integral to membrane	hypothetical protein LOC201158	170	TRUE	17:15406981-15407972	-5.10075	-5.22307	-4.9502	-0.272868	0.270544	0.0617101	4.38411	1.88917e-05	0.000613682	-4.99525	-5.11467	-4.87583	-0.238838	5.12918e-05
cg27141427	KIAA0247	14	69.1489	9766	+	36.1	NCBI:RefSeq	CGTGCCTACTTTTTGAAAGAAAATAGCTGGTTTCGGGGAGTTTAGCCTGG	69148066	+		NM_014734.2	GI:41281456	go_component: integral to membrane; go_function: molecular function unknown; go_process: biological process unknown	hypothetical protein LOC9766	847	TRUE	14:69147682-69148989	-4.31898	-4.3958	-4.22444	-0.171362	0.208827	0.0754831	2.76654	0.00620198	0.0397912	-5.91793	-6.07839	-5.75747	-0.320925	0.00159375
cg05311623	ANXA5	4	122.837	308	-	36.1	NCBI:RefSeq	TCTCCCGGGGTTTCGGGGCACTTGGGTCCCACAGTCTGGGTGAGTGGTCG	122837626	-	PP4; ANX5; ENX2;	NM_001154.2	GI:4809273	anchorin CII; lipocortin V; endonexin II; placental anticoagulant protein(PAP)-I; placental protein (PP)4; vascular anticoagulant (VAC)-alpha; placental anticoagulant protein I; go_component: cytoplasm; go_function: calcium ion binding; go_function: protein binding; go_function: phospholipase inhibitor activity; go_function: calcium-dependent phospholipid binding; go_process: blood coagulation; g…	annexin 5	169	TRUE	4:122836740-122838115	-4.22753	-4.29327	-4.14663	-0.146644	0.141134	0.0539361	2.61669	0.00956371	0.0527914	-4.61554	-4.68975	-4.54134	-0.148406	0.0119595
cg06751597	SNAP23	15	40.5755	8773	+	36.1	NCBI:RefSeq	ATGGTAATTCTCTGGACCCTTCCTCGAAATTAAACAGAGATCACTTTCCG	40575127	+	SNAP23A; SNAP23B; HsT17016;	NM_003825.2	GI:18765728	isoform SNAP23A is encoded by transcript variant 1; go_component: synaptosome; go_component: plasma membrane; go_function: t-SNARE activity; go_function: protein binding; go_process: protein transport; go_process: membrane fusion; go_process: vesicle targeting; go_process: post-Golgi transport	synaptosomal-associated protein 23 isoform SNAP23A	340	TRUE	15:40574846-40575481	-2.79743	-2.88934	-2.68431	-0.205026	0.22024	0.0725252	3.03674	0.0027134	0.0226704	-3.16028	-3.24823	-3.07233	-0.175904	0.0253632
cg14269514	MRPL9	1	150.003	65005	-	36.1	NCBI:RefSeq	CGCCTAGAATTACTGACTGATAATGGAATGAGTGTTAGGTGGACTGACGC	150002664	-	L9mt;	NM_031420.2	GI:22035596	go_component: ribosome; go_component: intracellular; go_component: mitochondrion; go_function: structural constituent of ribosome; go_process: protein biosynthesis	mitochondrial ribosomal protein L9	90	TRUE	1:150001936-150002890	-5.36534	-5.41375	-5.30576	-0.107986	0.130621	0.0501352	2.60538	0.00987413	0.0539697	-5.29852	-5.43668	-5.16036	-0.276327	2.11125e-05
cg15167433	XRCC1	19	48.7718	7515	-	36.1	NCBI:RefSeq	CAGCAAAAAGATTTGCTTTCTCGGCTTCAGTGTGGGCGGTAACTCCATCG	48771555	-	RCC;	NM_006297.1	GI:5454171	DNA repair protein XRCC1; X-ray-repair; complementing defective; repair in Chinese hamster; go_component: nucleus; go_function: damaged DNA binding; go_function: protein binding; go_process: single strand break repair	X-ray repair cross complementing protein 1	270	TRUE	19:48771076-48772554	-4.57683	-4.66448	-4.46895	-0.19553	0.236768	0.0873346	2.71105	0.00729642	0.044236	-6.10118	-6.12759	-6.07476	-0.0528224	0.0505296
cg25092328	PXMP4	20	31.7718	11264	-	36.1	NCBI:RefSeq	TCTCTGATTGGTCTTCCATGCATGAGTGACGCAGAAACAGCCTATAGACG	31771764	-	PMP24;	NM_007238.3	GI:34452733	isoform a is encoded by transcript variant 1; peroxisomal membrane protein 4 (24kD); 24 kDa peroxisomal intrinsic membrane protein; go_component: membrane fraction; go_component: integral to membrane; go_component: peroxisomal membrane	peroxisomal membrane protein 4 isoform a	16	TRUE	20:31771348-31771965	-5.69414	-5.86124	-5.48848	-0.372768	0.334829	0.126047	2.65638	0.00854245	0.0490061	-7.54109	-7.65399	-7.4282	-0.22579	0.0112055
cg23996241	AP2B1	17	30.9385	163	+	36.1	NCBI:RefSeq	CGGGCAGGAAACCATTACACCACCACCTGGGCTGTGCTCTCCGGCTCCCG	30938395	+	ADTB2; AP105B; CLAPB1; AP2-BETA; DKFZp781K0743;	NM_001282.2	GI:71773037	isoform b is encoded by transcript variant 2; adaptin; beta 2 (beta); plasma membrane adaptor HA2/AP2 adaptin beta subunit; clathrin assembly protein complex 2 beta large chain; clathrin-associated/assembly/adaptor protein; large; beta 1; go_component: coated pit; go_component: clathrin coat of trans-Golgi network vesicle; go_function: protein binding; go_process: protein complex assembly; go_pro…	adaptor-related protein complex 2; beta 1 subunit isoform b	80	TRUE	17:30938186-30938966	-5.19754	-5.31881	-5.04829	-0.270518	0.279781	0.0551642	5.07179	9.034e-07	5.77812e-05	-4.79391	-4.89588	-4.69195	-0.203931	0.00144426
cg26266098	LZTS2	10	102.747	84445	+	36.1	NCBI:RefSeq	CGCCCCCCACCCAGGGAGGGGAGTGGTCTGCCCCGCACTCCACCAGCAGC	102746955	+	LAPSER1; KIAA1813; RP11-108L7.8;	NM_032429.1	GI:45331214	go_component: membrane; go_component: cytoplasm; go_process: cell cycle; go_process: negative regulation of progression through cell cycle	leucine zipper; putative tumor suppressor 2	170	TRUE	10:102746683-102747736	-3.34868	-3.50684	-3.15403	-0.352817	0.395657	0.0928475	4.26137	3.14074e-05	0.000921418	-5.84504	-6.23242	-5.45766	-0.77476	0.0295743
cg08965324	LTA4H	12	94.954	4048	-	36.1	NCBI:RefSeq	CGGGGATACTCACCACTATACTAACGAGGAACCGCACGAAAGAAAGCCTT	94953496	-		NM_000895.1	GI:4505028	go_function: metal ion binding; go_function: zinc ion binding; go_function: metallopeptidase activity; go_function: epoxide hydrolase activity; go_function: membrane alanyl aminopeptidase activity; go_process: proteolysis; go_process: inflammatory response; go_process: leukotriene biosynthesis	leukotriene A4 hydrolase	462	TRUE	12:94952867-94954045	-3.35423	-3.54196	-3.12317	-0.418791	0.426573	0.129343	3.29799	0.00115442	0.0125463	-4.81178	-5.53091	-4.09265	-1.43826	9.69778e-05
cg07004820	TGFA	2	70.634	7039	-	36.1	NCBI:RefSeq	GCAGGGGGTGCCAAAGGGGCGCAGGCAAGACCCGGCCAGAGGGTTAGACG	70634438	-	TFGA;	NM_003236.1	GI:4507460	transforming growth factor-alpha; go_component: soluble fraction; go_component: extracellular space; go_component: plasma membrane; go_component: integral to plasma membrane; go_function: protein binding; go_function: growth factor activity; go_function: signal transducer activity; go_function: signal transducer activity; go_function: protein-tyrosine kinase activity; go_function: epidermal growt…	transforming growth factor; alpha	479	TRUE	2:70633222-70635161	-5.25361	-5.35796	-5.12519	-0.232771	0.241612	0.076381	3.16324	0.00180599	0.0172276	-4.76068	-4.90288	-4.61849	-0.284385	0.00230116
cg16241648	ARPC1A	7	98.761	10552	+	36.1	NCBI:RefSeq	AAGTTTTTCTCCCTTCAGAGAGCCAAGGTCAGAGCCAGTCTACCTCAGCG	98761446	+	Arc40; SOP2L; SOP2Hs;	NM_006409.2	GI:22907051	actin related protein 2/3 complex; subunit 1A (41 kD); actin binding protein (Schizosaccharomyces pombe sop2-like); SOP2-like protein	actin related protein 2/3 complex subunit 1A	396	TRUE	7:98761005-98762002	-5.41806	-5.5424	-5.26503	-0.277376	0.293524	0.072777	4.0332	7.85107e-05	0.00179659	-5.82266	-5.87985	-5.76547	-0.11438	0.0398225
cg00958517	ST3GAL2	16	69.0308	6483	-	36.1	NCBI:RefSeq	CGGCGGACCCCCTGAGCCCTAGCGAAACTACAAAGCCCACAATCCCTGGG	69030492	-	SIAT4B; ST3GALII; Gal-NAc6S; ST3GalA.2;	NM_006927.2	GI:27765098	sialyltransferase 4B (beta-galactoside alpha-2;3-sialytransferase); sialyltransferase 4B (beta-galactosidase alpha-2;3-sialytransferase); alpha 2;3-ST; Gal-beta-1;3-GalNAc-alpha-2;3-sialyltransferase; CMP-N-acetylneuraminate-beta-galactosamide-alpha-2; 3-sialyltransferase; sialyltransferase 4B (beta-galactoside alpha-2;3-sialyltransferase); go_component: membrane; go_component: Golgi stack; go_co…	sialyltransferase 4B	325	TRUE	16:69029963-69031227	-5.15039	-5.26636	-5.00766	-0.258704	0.242459	0.0909806	2.66495	0.00833515	0.0482469	-5.02628	-5.12481	-4.92776	-0.197057	1.34336e-05
cg13423394	ABHD6	3	58.1981	57406	+	36.1	NCBI:RefSeq	AGATCCAGAGATCCTGCCTGAGTCACTTTGGCGGGTTTAATGCCCAGCCG	58198349	+		NM_020676.4	GI:47271494	lipase protein; go_function: hydrolase activity; go_process: aromatic compound metabolism	abhydrolase domain containing 6	249	TRUE	3:58198020-58199479	-3.80268	-3.89311	-3.69138	-0.20173	0.226518	0.0598767	3.78308	0.000205137	0.00365151	-4.21917	-4.35387	-4.08448	-0.269399	0.000269052
cg22857604	RASSF5	1	204.797	83593	+	36.1	NCBI:RefSeq	CGGCCCGGTAACCTGCTCCTGTCCCCGCGCCGCCTGCGCCTGCAGAGCCC		+	RAPL; Maxp1; NORE1; RASSF3; MGC10823;	NT_021877.18	Ras association (RalGDS/AF-6) domain family 5 isoform B	contains putative C1-membrane binding domain; ATM phosphorylation site; and SH3-binding domain; isoform B is encoded by transcript variant 2; Rap1-binding protein; go_function: protein binding; go_function: protein binding; go_process: signal transduction; go_process: intracellular signaling cascade			TRUE	1:204796949-204797698	-5.52495	-5.63839	-5.38533	-0.253059	0.266735	0.101673	2.62345	0.00938222	0.0521671	-6.62412	-6.81689	-6.43135	-0.385545	0.00416704
cg25363317	GTF2F1	19	6.34405	2962	-	36.1	NCBI:RefSeq	CATGGGCAATGGTCAGTGGTTCCGATCTGGTCCGACCCGGGTTCCTTTCG	6344184	-	BTF4; RAP74; TF2F1; TFIIF;	NM_002096.1	GI:4504196	general transcription factor IIF; polypeptide 1 (74kD subunit); go_component: nucleus; go_component: transcription factor TFIIF complex; go_function: ATP binding; go_function: DNA binding; go_function: nucleotide binding; go_function: protein binding; go_function: transferase activity; go_function: magnesium ion binding; go_function: transcriptional activator activity; go_function: transcription …	general transcription factor IIF; polypeptide 1; 74kDa	132	TRUE	19:6343748-6345172	-4.7921	-4.88232	-4.68107	-0.20125	0.219836	0.0639008	3.44027	0.000708678	0.00897616	-4.80372	-4.9232	-4.68424	-0.238965	6.23103e-05
cg26233468	KRTCAP2	1	153.412	200185	-	36.1	NCBI:RefSeq	CGCTGACGCATGCGCATAGCTAACCGCACCCGGTTCAGCTCGCCTTTCTT	153412428	-	KCP2;	NM_173852.3	GI:56676325	keratinocytes associated protein 2	keratinocyte associated protein 2	18	TRUE	1:153411943-153413398	-6.15774	-6.24147	-6.05468	-0.186792	0.240058	0.0912087	2.63196	0.00915846	0.0513387	-8.49651	-8.87231	-8.12071	-0.751598	0.048539
cg01880404	XRCC1	19	48.7714	7515	-	36.1	NCBI:RefSeq	CGTGAGGGAATTAATGAGGATAGCTCTTAAAAGAGCTTTTGGGGTTCTCT	48771555	-	RCC;	NM_006297.1	GI:5454171	DNA repair protein XRCC1; X-ray-repair; complementing defective; repair in Chinese hamster; go_component: nucleus; go_function: damaged DNA binding; go_function: protein binding; go_process: single strand break repair	X-ray repair cross complementing protein 1	188	TRUE	19:48771076-48772554	-5.12272	-5.20435	-5.02224	-0.182107	0.187062	0.0492283	3.79989	0.000192593	0.00351635	-5.00329	-5.05435	-4.95223	-0.10212	0.00151731
cg22688260	ZCSL2	3	16.2818	285381	-	36.1	NCBI:RefSeq	CGCCTTAAATAGCCCGCTGAAGGCTGCAGCAGGTGCTAGGTAGCAGCCTC	16281409	-	DPH3; DESR1; DELGIP1; MGC20197;	NM_206831.1	GI:45592951	deafness locus putative guanine nucleotide exchange factor interacting protein 1; go_component: nucleus; go_component: cytoplasm; go_function: zinc ion binding; go_function: metal ion binding; go_function: protein binding; go_process: positive regulation of binding; go_process: negative regulation of protein secretion; go_process: peptidyl-diphthamide biosynthesis from peptidyl-histidine	zinc finger; CSL domain containing 2	404	TRUE	3:16280861-16282136	-5.95476	-6.0428	-5.84639	-0.196412	0.220165	0.0612743	3.5931	0.000412322	0.00606988	-6.58501	-6.66413	-6.50589	-0.158239	0.0432534
cg11021744	SLC6A1	3	11.0093	6529	+	36.1	NCBI:RefSeq	GAGAGCCTGCTGGCGGCGAAGCTGCAAGAGGCAGCTGCGGAGGGAGCGCG	11009453	+	GAT1; GABATR; GABATHG;	NM_003042.2	GI:40254466	go_component: membrane; go_component: membrane fraction; go_component: integral to plasma membrane; go_function: symporter activity; go_function: neurotransmitter:sodium symporter activity; go_function: gamma-aminobutyric acid:sodium symporter activity; go_process: synaptic transmission; go_process: neurotransmitter transport	solute carrier family 6 (neurotransmitter transporter; GABA); member 1	174	TRUE	3:11008964-11010557	-4.79329	-4.90592	-4.65468	-0.251241	0.231989	0.0861003	2.69441	0.00765701	0.0455901	-3.10849	-3.53656	-2.68043	-0.856138	0.0338892
cg26045220	KIAA1324	1	109.458	57535	+	36.1	NCBI:RefSeq	GCCCTTTCGGGCCAGGGGTTATTTTATGAGCATCTCCGATGTTGCACACG	109458056	+	RP11-352P4.1;	NM_020775.2	GI:38569481	maba1	hypothetical protein LOC57535	208	TRUE	1:109456899-109458644	-5.75001	-5.89922	-5.56638	-0.332839	0.345793	0.0637773	5.42187	1.70588e-07	1.61901e-05	-5.34443	-5.48362	-5.20524	-0.278381	4.4817e-05
cg15257765	MRPL46	15	86.8115	26589	-	36.1	NCBI:RefSeq	CAATGGGGTCAACGGCTTGGAGACTACAGGTGGCCGCTGCAGGCACAACG	86811623	-	LIECG2; P2ECSL; C15orf4; MGC22762;	NM_022163.2	GI:26667176	go_component: mitochondrion; go_component: ribonucleoprotein complex	mitochondrial ribosomal protein L46	160	TRUE	15:86811255-86812360	-5.22092	-5.29765	-5.12647	-0.171186	0.163151	0.0552989	2.95035	0.0035568	0.0273024	-5.01063	-5.06446	-4.9568	-0.107656	0.0371424
cg00655307	ESR1	6	152.17	2099	+	36.1	NCBI:RefSeq	CGGCCAGGGACTGTTGCCTTGCCCTGACATTGGCTTAAACATCACTCCAG	152170379	+	ER; ESR; Era; ESRA; NR3A1; major ORF; DKFZp686N23123;	NM_000125.2	GI:62821793	oestrogen receptor; estrogen receptor 1 (alpha); dJ443C4.1.1 (estrogen receptor 1); steroid hormone receptor; go_component: nucleus; go_component: nucleus; go_component: membrane; go_component: chromatin remodeling complex; go_function: DNA binding; go_function: lipid binding; go_function: steroid binding; go_function: zinc ion binding; go_function: metal ion binding; go_function: receptor activi…	estrogen receptor 1	57	TRUE	6:152170010-152172178	-4.76074	-4.82694	-4.67925	-0.147686	0.147954	0.0533137	2.77516	0.00604602	0.0391196	-4.61521	-4.72677	-4.50365	-0.223119	0.00230116
cg06279414	TRIP11	14	91.5759	9321	-	36.1	NCBI:RefSeq	AGGCAGAACCTGGAGTCGGCCTTGCCTGAGAACCCAGCTTTGTGTTATCG	91576139	-	CEV14; TRIP230; GMAP-210;	NM_004239.1	GI:10863904	thyroid receptor interacting protein 11; go_component: Golgi stack; go_function: protein binding; go_function: transcription coactivator activity; go_process: transcription from RNA polymerase II promoter	thyroid hormone receptor interactor 11	246	TRUE	14:91575587-91576625	-5.35141	-5.46705	-5.2091	-0.257951	0.261612	0.0831239	3.14725	0.00190271	0.0178688	-6.58762	-6.67428	-6.50095	-0.173334	0.010668
cg25786436	PRKAG2	7	151.205	51422	-	36.1	NCBI:RefSeq	CGGAACCCTCGTAGGCAAATCAGTCAAAGCCCGTCCCGGTTCTGGTGTCT	151204728	-	AAKG; WPWS; AAKG2; H91620p;	NM_016203.2	GI:33186924	go_component: cellular component unknown; go_function: molecular function unknown; go_process: fatty acid biosynthesis; go_process: cholesterol biosynthesis	protein kinase; AMP-activated; gamma 2 non-catalytic subunit	118	TRUE	7:151203544-151206370	-5.78638	-5.94367	-5.59278	-0.350893	0.399724	0.117364	3.40584	0.000798656	0.0096983	-7.05556	-7.32508	-6.78605	-0.539029	3.04702e-06
cg23261233	ACTB	7	5.53702	60	-	36.1	NCBI:RefSeq	GAGTTTTGGCGTTGGCCGCCTTGGGGTGCTGGGCCCGGGGGCTGGGGGCG	5536747	-		NM_001101.2	GI:5016088	beta cytoskeletal actin; go_component: cytoskeleton; go_component: actin filament; go_component: TIP60 histone acetyltransferase complex; go_function: ATP binding; go_function: nucleotide binding; go_function: protein binding; go_function: structural constituent of cytoskeleton	beta actin	268	TRUE	7:5535219-5537215	-5.44991	-5.6416	-5.21398	-0.427616	0.389282	0.118899	3.27407	0.00125119	0.0132552	-6.49512	-6.69327	-6.29698	-0.396289	0.00420484
cg15020645	APC	5	112.102	324	+	36.1	NCBI:RefSeq	CGCCCCCCACTGCAGCACTGGAGATGGATTTCCTGTACTTCGGATCCAGG	112101483	+	GS; DP2; DP3; FAP; FPC; DP2.5;	NM_000038.3	GI:53759121	tumor suppressor; adenomatosis polyposis coli tumor suppressor; adenomatous polyposis coli protein; adenomatous polyposisi coli; go_component: nucleus; go_component: lateral plasma membrane; go_function: microtubule binding; go_function: beta-catenin binding; go_process: cell cycle; go_process: cell adhesion; go_process: signal transduction; go_process: protein complex assembly; go_process: Wnt r…	adenomatosis polyposis coli	185	FALSE		-4.49194	-4.54621	-4.42515	-0.121055	0.139147	0.0436488	3.18787	0.00166595	0.0162762	-4.93015	-5.00048	-4.85982	-0.140657	0.0138227
cg05361373	PYCARD	16	31.1214	29108	-	36.1	NCBI:RefSeq	GAAGCTGACCAGCTTGTCGGTGAGGTCCAAGGCGTCCATGGACAGCAGCG	31121752	-	ASC; TMS1; CARD5; MGC10332;	NM_013258.3	GI:22035618	isoform a is encoded by transcript variant 1; apoptosis-associated speck-like protein containing a CARD; target of methylation-induced silencing-1; caspase recruitment domain protein 5; go_component: cytoplasm; go_function: protein binding; go_function: caspase activator activity; go_process: cell cycle; go_process: caspase activation; go_process: regulation of apoptosis; go_process: signal trans…	PYD and CARD domain containing isoform a	368	TRUE	16:31120978-31121976	-4.12826	-4.21097	-4.02647	-0.184501	0.167615	0.0582148	2.87924	0.00442464	0.0316518	-4.34396	-4.39574	-4.29218	-0.103568	0.0403777
cg03793131	ELOVL1	1	43.6061	64834	-	36.1	NCBI:RefSeq	CGCCCCCTGCCTGGCCAGCCCGGCCCAGCCCGGCCCAGCCCTGCCCTGCC	43606286	-	Ssc1; CGI-88;	NM_022821.2	GI:42490763	go_component: integral to membrane; go_component: endoplasmic reticulum; go_process: fatty acid biosynthesis	elongation of very long chain fatty acids (FEN1/Elo2; SUR4/Elo3; yeast)-like 1	152	TRUE	1:43606114-43606880	-5.5185	-5.67297	-5.32839	-0.344576	0.373241	0.10007	3.72979	0.000250197	0.00424798	-6.19334	-6.31477	-6.07191	-0.242864	0.0270999
cg27398547	C14orf39	14	60.0225	317761	-	36.1	NCBI:RefSeq	CTGAGCGAGTCCAGCCCAGGGCTCCGGGGACCGTTTGTAGTTAGGATCCG	60022502	-		NM_174978.1	GI:28372512		hypothetical protein LOC317761	11	TRUE	14:60021580-60022823	-1.8267	-2.06958	-1.52778	-0.541798	0.526504	0.124066	4.24374	3.37564e-05	0.000970968	-2.5063	-2.83827	-2.17432	-0.663948	1.85675e-10
cg12346515	AMACR	5	34.0442	23600	-	36.1	NCBI:RefSeq	CGGTAACAGGCAGGAGCTCCAAAGGTCAGTCCCTGCAATTTAAGACTCAG	34043963	-	RACE;	NM_014324.4	GI:42794624	isoform 1 is encoded by transcript variant 1; go_component: peroxisome; go_component: mitochondrion; go_function: lyase activity; go_function: isomerase activity; go_function: alpha-methylacyl-CoA racemase activity; go_process: metabolism	alpha-methylacyl-CoA racemase isoform 1	225	TRUE	5:34043408-34044378	-5.15806	-5.2272	-5.07297	-0.154228	0.164006	0.0529767	3.09581	0.00224721	0.0198547	-5.1771	-5.28226	-5.07194	-0.210323	0.000890605
cg19217872	ZNF187	6	28.3428	7741	+	36.1	NCBI:RefSeq	CTAGGAACGCTGGAGGACCTTGGCTCGATGGTGCTGCCGCTTAGGCATCG	28342872	+	MGC2815; SRE-ZBP;	NM_152736.3	GI:66932933	go_component: nucleus; go_component: nucleus; go_function: zinc ion binding; go_function: metal ion binding; go_function: nucleic acid binding; go_function: transcription factor activity; go_process: regulation of transcription; DNA-dependent	zinc finger protein 187	50	TRUE	6:28342707-28343271	-4.10201	-4.19581	-3.98656	-0.209252	0.199965	0.0610001	3.27812	0.00123429	0.013137	-4.07842	-4.26814	-3.8887	-0.37944	8.80934e-07
cg19401923	MRPL19	2	75.7273	9801	+	36.1	NCBI:RefSeq	CGTGCACTTTTCCTAAGACATCAGGAAAGGAGCGAGGAGAGACTTATCCA	75727420	+	RLX1; RPML15; MRP-L15; KIAA0104; MGC20675;	NM_014763.2	GI:21735600	go_component: ribosome; go_component: nucleus; go_component: mitochondrion; go_component: nuclear membrane; go_function: structural constituent of ribosome; go_process: protein biosynthesis	mitochondrial ribosomal protein L19	122	TRUE	2:75727145-75728107	-5.67456	-5.82151	-5.49371	-0.327798	0.268705	0.0784041	3.42718	0.000741707	0.00924105	-6.50235	-6.57289	-6.43182	-0.141078	0.0320109
cg01333619	VPS26B	11	133.599	112936	+	36.1	NCBI:RefSeq	TTACTTTAGCTCGATACACGTTGGGCTGCCTTTCACATTCGGATATTACG	133599784	+	MGC10485;	NM_052875.2	GI:34147470	go_component: cytosol; go_function: protein binding; go_function: protein transporter activity; go_process: intracellular protein transport; go_process: retrograde transport; endosome to Golgi	hypothetical protein LOC112936	324	TRUE	11:133598609-133600792	-5.55644	-5.71817	-5.35738	-0.360788	0.377577	0.114482	3.29813	0.00115387	0.012547	-7.06983	-7.30373	-6.83593	-0.467808	0.000100472
cg11223864	GNB2	7	100.109	2783	+	36.1	NCBI:RefSeq	GGTGGGGTTTTGTCTCCTGGCTTCCCCCAAGTGCGAGGCAGTTGGTCTCG	100109311	+		NM_005273.2	GI:20357528	G protein; beta-2 subunit; guanine nucleotide-binding protein G(I)/G(S)/G(T) beta subunit 2; signal-transducing guanine nucleotide-binding regulatory protein beta subunit; transducin beta chain 2; go_component: heterotrimeric G-protein complex; go_function: signal transducer activity; go_process: signal transduction; go_process: G-protein coupled receptor protein signaling pathway	guanine nucleotide-binding protein; beta-2 subunit	52	TRUE	7:100108267-100110339	-4.60626	-4.71012	-4.47843	-0.231685	0.241462	0.0476444	5.06799	9.19491e-07	5.84473e-05	-5.03141	-5.12352	-4.93929	-0.184232	0.000890605
cg07048066	C5orf5	5	137.397	51306	-	36.1	NCBI:RefSeq	CGCCTGGCTGCTCGCACCCTAATTCAGGACCCCAATTGGTGGGAGAGGAA	137396619	-	N61; KHCHP;	NM_016603.1	GI:7706136	contains two bipartite nuclear localization signals; go_function: GTPase activator activity	chromosome 5 open reading frame 5	236	TRUE	5:137395699-137397068	-4.53717	-4.66547	-4.37926	-0.28621	0.227563	0.0794285	2.86501	0.00462006	0.0325633	-5.17471	-5.27756	-5.07185	-0.205715	0.00569055
cg18702234	PSME3	17	38.2394	10197	+	36.1	NCBI:RefSeq	GGCTGGGGGATTACCAGCTGTCACGGGCCTAAAGCCCTGAGTCCAACACG	38238949	+	Ki; PA28G; REG-GAMMA; PA28-gamma;	NM_005789.2	GI:30410793	isoform 1 is encoded by transcript variant 1; Ki nuclear autoantigen; Ki antigen; proteasome activator 28-gamma; 11S regulator complex gamma subunit; activator of multicatalytic protease subunit 3; go_component: proteasome activator complex; go_function: protein self binding; go_function: proteasome activator activity	proteasome activator subunit 3 isoform 1	498	TRUE	17:38238397-38239570	-4.45919	-4.52161	-4.38237	-0.139244	0.123787	0.0459347	2.69485	0.00764735	0.0455458	-4.20766	-4.33564	-4.07969	-0.255947	2.93562e-05
cg12246527	MAP2K5	15	65.6218	5607	+	36.1	NCBI:RefSeq	CGAAGGGTAAAAGGCTGGAGTCCGCCAAAAGCCAATTTAAGGCTTAACAT	65622075	+	MEK5; MAPKK5; PRKMK5; HsT17454;	NM_002757.2	GI:21729893	isoform B is encoded by transcript variant B; dual specificity mitogen-activated protein kinase kinase 5; MAP kinase kinase MEK5b; MAPK/ERK kinase 5; go_function: ATP binding; go_function: nucleotide binding; go_function: protein binding; go_function: transferase activity; go_function: protein-tyrosine kinase activity; go_function: protein serine/threonine kinase activity; go_process: signal tran…	mitogen-activated protein kinase kinase 5 isoform B	291	TRUE	15:65621656-65622658	-5.22826	-5.34783	-5.0811	-0.266729	0.241327	0.0648219	3.72292	0.000256643	0.00433597	-5.68147	-5.78915	-5.57379	-0.215353	6.86263e-05
cg11947493	TNFRSF10D	8	23.0775	8793	-	36.1	NCBI:RefSeq	CGGAGGAGCACGTTCTATTCTGGCAGTGTAGCTGCGAGAACCTTTGCACG	23077485	-	DCR2; CD264; TRUNDD; TRAILR4;	NM_003840.3	GI:42544227	decoy receptor 2; TNF receptor-related receptor for TRAIL; decoy with truncated death domain; TRAIL receptor 4; TRAIL receptor with a truncated death domain; go_component: membrane; go_component: integral to membrane; go_function: transmembrane receptor activity; go_process: apoptosis; go_process: anti-apoptosis; go_process: signal transduction	tumor necrosis factor receptor superfamily; member 10d precursor	25	TRUE	8:23076422-23077641	-5.38477	-5.54345	-5.18947	-0.353977	0.289903	0.105598	2.74534	0.00660114	0.0413223	-4.65499	-4.75055	-4.55944	-0.191119	0.000106562
cg04667458	C1orf128	1	23.9779	57095	+	36.1	NCBI:RefSeq	CGGAAAAGCGCTTGGCAACCAGGCTGTCGTTATTCTTAACATCAGAAATG	23977470	+	HT014; TXNL1CL; RP5-886K2.4;	NM_020362.2	GI:21361836	TXNL1 C-terminal like; HT014	thioredoxin family Trp26	436	TRUE	1:23976437-23978046	-4.6788	-4.76319	-4.57495	-0.188236	0.212335	0.0810983	2.61825	0.00952165	0.0526438	-6.36997	-6.48172	-6.25823	-0.22349	0.00990472
cg07935151	LSM2	6	31.8826	57819	-	36.1	NCBI:RefSeq	AGACAGCAGGGTGCTGCGAGCAGGTCTGGGGAAACCGAAGCGCGAGCCCG	31882722	-	G7b; snRNP; C6orf28; YBL026W;	NM_021177.3	GI:34013512	U6 snRNA-associated Sm-like protein; go_component: nucleus; go_component: small nucleolar ribonucleoprotein complex; go_function: RNA binding; go_function: protein binding; go_function: U6 snRNA binding; go_process: nuclear mRNA splicing; via spliceosome	LSM2 homolog; U6 small nuclear RNA associated	125	TRUE	6:31882327-31882980	-4.74868	-4.82667	-4.65269	-0.173984	0.170444	0.0596047	2.85957	0.00469672	0.0329346	-4.21363	-4.29276	-4.1345	-0.158261	0.000219969
cg19578398	PEO1	10	102.737	56652	+	36.1	NCBI:RefSeq	CGACTCCCCGGGTAGGTCGCCCCCAGTCAGGGGTCATACTGCTCACTGTC	102737302	+	PEO; PEOA3; SANDO; TWINL; C10orf2; FLJ21832;	NM_021830.3	GI:39725941	gp4-like protein with intramitochondrial nucleoid localization; go_component: mitochondrion; go_function: ATP binding; go_function: helicase activity; go_function: hydrolase activity; go_function: nucleotide binding; go_process: DNA replication	twinkle	297	TRUE	10:102736429-102737826	-2.98278	-3.05579	-2.89292	-0.162868	0.176721	0.0564563	3.13023	0.00201089	0.0185547	-3.1602	-3.39753	-2.92287	-0.474656	0.000160001
cg08158570	ZNF503	10	76.8309	84858	-	36.1	NCBI:RefSeq	CGGCACGAACTGGCCACATTTTGCACCCCGAGTACCTGCAGCCCCTGCCT	76831431	-	MGC2555; FLJ45745;	NM_032772.3	GI:34222201	go_component: nucleus; go_function: zinc ion binding; go_function: metal ion binding; go_function: nucleic acid binding	zinc finger protein 503	490	TRUE	10:76828249-76835634	-5.56846	-5.72351	-5.37762	-0.345884	0.474724	0.119473	3.9735	9.91574e-05	0.00214737	-6.25282	-6.3535	-6.15215	-0.201345	0.0505296
cg20315643	TAF1C	16	82.7781	9013	-	36.1	NCBI:RefSeq	TGCCAAAGCTGGGGTTCTACTTGAGATTTCCCTCGTGGTGCCAGGGTCCG	82778163	-	SL1; TAFI95; TAFI110; MGC:39976;	NM_139353.1	GI:21536366	isoform 2 is encoded by transcript variant 2; transcription factor SL1; SL1; 110kD subunit; go_component: nucleus; go_function: DNA binding; go_function: RNA polymerase I transcription factor activity; go_function: general RNA polymerase II transcription factor activity; go_process: transcription; go_process: transcription from RNA polymerase I promoter; go_process: transcription from RNA polymer…	TBP-associated factor 1C isoform 2	100	TRUE	16:82776333-82778439	-4.76084	-4.82845	-4.67763	-0.150812	0.132284	0.0384962	3.43629	0.00071856	0.00905676	-4.54573	-4.66687	-4.4246	-0.242274	0.000412693
cg15507817	WNT7B	22	44.7512	7477	-	36.1	NCBI:RefSeq	CGCCAAAGCAGAGAAACACGTAGAAAATCCACTTGCGAAAGTTTCTGTGC	44751395	-		NM_058238.1	GI:17505192	go_component: extracellular region; go_function: signal transducer activity; go_function: extracellular matrix structural constituent; go_process: development; go_process: cell-cell signaling; go_process: frizzled-2 signaling pathway	wingless-type MMTV integration site family; member 7B precursor	148	TRUE	22:44750072-44752197	-5.49183	-5.59911	-5.3598	-0.239302	0.196529	0.0632009	3.10959	0.00214968	0.0192741	-4.61781	-4.89216	-4.34347	-0.548697	0.050868
cg11802692	FKBP14	7	30.0329	55033	-	36.1	NCBI:RefSeq	TACCTTTAAAGAGTTAAGCCCAAATGCCGGCCTGACTGGCTCTTATAACG	30032793	-	FKBP22; FLJ20731;	NM_017946.2	GI:51593093	FK506 binding protein 14 (22 kDa); go_component: endoplasmic reticulum; go_function: isomerase activity; go_function: calcium ion binding; go_function: peptidyl-prolyl cis-trans isomerase activity; go_process: protein folding	FK506 binding protein 14; 22 kDa	80	TRUE	7:30032713-30033343	-4.50652	-4.60248	-4.38841	-0.21407	0.21067	0.0594827	3.5417	0.000495683	0.00691639	-4.90072	-4.95744	-4.84399	-0.113447	0.00154747
cg21461100	NOVA2	19	51.1692	4858	-	36.1	NCBI:RefSeq	CGCCCTTCGGCGCCCCCATTGGTCCAGCCTTGAAGCCTGGACCACGTCCC	51168497	-	ANOVA; NOVA3;	NM_002516.1	GI:5902723	neuro-oncological ventral antigen 3; NOVA2 [amino acids 1-28]; go_component: nucleus; go_function: RNA binding	neuro-oncological ventral antigen 2	681	TRUE	19:51168270-51169615	-3.58893	-3.7755	-3.35931	-0.416189	0.406943	0.0838331	4.8542	2.44689e-06	0.000130554	-3.4462	-3.60205	-3.29034	-0.311717	0.00387553
cg22473973	BNIP3	10	133.645	664	-	36.1	NCBI:RefSeq	TGGTCATTAAAACCAATACTGGTCTGAACTACAGACCGCGGAGGGCAACG	133645425	-	NIP3;	NM_004052.2	GI:7669480	go_component: membrane; go_component: integral to membrane; go_component: mitochondrial envelope; go_function: protein binding; go_function: protein binding; go_process: apoptosis; go_process: anti-apoptosis; go_process: positive regulation of apoptosis	BCL2/adenovirus E1B 19kD-interacting protein 3	524	TRUE	10:133644338-133646745	-4.20331	-4.29646	-4.08867	-0.207792	0.223467	0.0595514	3.75251	0.000229949	0.00396633	-2.42173	-2.58442	-2.25904	-0.325381	0.000131492
cg16161425	DHFR	5	79.9867	1719	-	36.1	NCBI:RefSeq	CGCTGAGGTTTTAGTACTTCCGTTTGAGGAGATAGGCAAAGGTTATGCAG	79986556	-		NM_000791.3	GI:68303806	go_component: cellular component unknown; go_function: NADP binding; go_function: oxidoreductase activity; go_function: dihydrofolate reductase activity; go_process: glycine biosynthesis; go_process: nucleotide biosynthesis; go_process: one-carbon compound metabolism	dihydrofolate reductase	156	TRUE	5:79985571-79986803	-5.21848	-5.28861	-5.13215	-0.156461	0.146494	0.0527386	2.77774	0.00600008	0.0388957	-5.33865	-5.4594	-5.21789	-0.241512	0.000307289
cg06269753	MSC	8	72.9184	9242	-	36.1	NCBI:RefSeq	AGGACCGCTATGAGAACGGCTACGTGCACCCAGTGAACCTGGTAGGGGCG	72919177	-	ABF1; MYOR; ABF-1;	NM_005098.2	GI:6996017	activated B-cell factor 1; homolog of mouse musculin; activated B-cell factor-1; go_component: nucleus; go_component: nucleus; go_function: transcription regulator activity; go_function: transcription factor activity; go_function: transcription corepressor activity; go_process: regulation of transcription; go_process: regulation of transcription; DNA-dependent; go_process: transcription from RNA …	musculin (activated B-cell factor-1)	752	TRUE	8:72918220-72919616	-2.46106	-2.52437	-2.38314	-0.141226	0.1713	0.0562334	3.04623	0.00263295	0.0221782	-3.14497	-3.29494	-2.995	-0.299942	2.17669e-06
cg16657615	TNFRSF12A	16	3.01063	51330	+	36.1	NCBI:RefSeq	CGGGAGCGAGCTGTTTGAAGGCCACCTGACCCCAGATCCCCACATCCGCC	3010361	+	FN14; CD266; TWEAKR;	NM_016639.1	GI:7706185	go_component: membrane; go_component: integral to membrane; go_function: protein binding; go_function: receptor activity; go_process: apoptosis; go_process: angiogenesis; go_process: cell adhesion; go_process: cell motility; go_process: cell differentiation	type I transmembrane protein Fn14	270	TRUE	16:3009760-3011478	-4.54237	-4.60381	-4.46674	-0.137067	0.156708	0.0575136	2.72471	0.00701191	0.0431591	-4.5758	-4.66797	-4.48363	-0.184349	0.0001656
cg19815139	C14orf133	14	76.9939	63894	-	36.1	NCBI:RefSeq	GACCCTAAATCGCCCTTGCTGAGCCTCATGGGAATTGTAGTCTTGCTACG	76993657	-	FLJ12707;	NM_022067.2	GI:20127606	synonym: FLJ12707	hypothetical protein LOC63894	239	TRUE	14:76993192-76994513	-5.58833	-5.69052	-5.46255	-0.227968	0.218342	0.0739204	2.95374	0.00351962	0.0270978	-5.55149	-5.7423	-5.36069	-0.38161	0.00255406
cg05477027	DMWD	19	50.9874	1762	-	36.1	NCBI:RefSeq	GTCTGCTTCAACTTGGGCCGTGAGCTCTATTTCTACCCAGGCTGCTGTCG	50987900	-	59; DMR-N9; D19S593E;	NM_004943.1	GI:62945416	protein 59; go_component: cellular component unknown; go_function: molecular function unknown; go_process: meiosis	dystrophia myotonica-containing WD repeat motif protein	470	TRUE	19:50987229-50988310	-5.45107	-5.53692	-5.34541	-0.19151	0.198236	0.0635808	3.11786	0.00209301	0.0190228	-6.06714	-6.1673	-5.96699	-0.200308	0.0149648
cg14056942	TSC22D2	3	151.61	9819	+	36.1	NCBI:RefSeq	CGGCCAAGAAGAAGAGCTGCTTCCAGATCACCAGTGTCACCACGGCCCAG	151609478	+	TILZ4a; TILZ4b; TILZ4c; KIAA0669;	NM_014779.2	GI:42734313	go_function: transcription factor activity; go_process: regulation of transcription; DNA-dependent	TSC22 domain family 2	363	TRUE	3:151608534-151611543	-4.46593	-4.56973	-4.33819	-0.231537	0.227898	0.0688926	3.30801	0.00111599	0.0122646	-4.21937	-4.35579	-4.08296	-0.272827	9.92944e-05
cg22708853	FLT3LG	19	54.6695	2323	+	36.1	NCBI:RefSeq	GGGCTGGGTTCCCGGGTCCCTAACCTGGGGAGGGTTCTGGGGACCAGACG	54669298	+		NM_001459.2	GI:38455415	go_component: membrane; go_component: extracellular space; go_component: integral to membrane; go_component: soluble fraction; go_function: cytokine activity; go_process: signal transduction; go_process: positive regulation of cell proliferation	fms-related tyrosine kinase 3 ligand	184	TRUE	19:54669447-54669684	-4.70037	-4.79859	-4.57948	-0.219116	0.254401	0.0712428	3.5709	0.000446565	0.00642697	-5.75708	-5.84397	-5.6702	-0.173772	0.029789
cg17775235	NPTX1	17	76.0654	4884	-	36.1	NCBI:RefSeq	CGACCTGGGTCCTTGGGCACCCAGCCCGGCTCCAAACGACCCCGGCCCAA	76064999	-	NP1; MGC105123; DKFZp686J2446;	NM_002522.2	GI:55770877	go_function: calcium ion binding; go_process: transport; go_process: synaptic transmission; go_process: central nervous system development	neuronal pentraxin I precursor	451	TRUE	17:76063756-76067139	-4.53254	-4.61407	-4.43219	-0.181875	0.172072	0.0633482	2.71629	0.007186	0.0438116	-4.73199	-4.88676	-4.57723	-0.309534	0.0376658
cg09721047	ARHGAP25	2	68.8155	9938	+	36.1	NCBI:RefSeq	CGCAGAGGGAAGTGTCAACTGGGATATTTCTGGTAAAACTGAAAGCAAGA	68815472	+		NM_014882.2	GI:55770896	isoform b is encoded by transcript variant 2; go_function: GTPase activator activity	Rho GTPase activating protein 25 isoform b	44	FALSE		-4.45012	-4.53125	-4.35026	-0.180995	0.182781	0.0596442	3.06451	0.00248409	0.0212457	-6.58585	-6.77508	-6.39661	-0.378467	0.0213562
cg20923575	MTMR4	17	53.9513	9110	-	36.1	NCBI:RefSeq	CTTTAATTAGCCCGGGGCTAATGTCCTCACCCATCTTTGTTTATAGAACG	53950211	-	ZFYVE11; KIAA0647; FYVE-DSP2;	NM_004687.3	GI:31377795	zinc finger; FYVE domain containing 11; go_function: zinc ion binding; go_function: hydrolase activity; go_function: phosphoprotein phosphatase activity; go_function: inositol or phosphatidylinositol phosphatase activity; go_process: phospholipid dephosphorylation; go_process: protein amino acid dephosphorylation	myotubularin related protein 4	1061	TRUE	17:53949987-53951320	-5.06889	-5.16203	-4.95426	-0.207766	0.252873	0.0970516	2.60555	0.00986935	0.0539579	-7.16545	-7.49884	-6.83206	-0.666778	0.000599815
cg20715219	DDX17	22	37.2322	10521	-	36.1	NCBI:RefSeq	CGCCTAAACCGCGGCACTGCCCGGTTTGAGCGTAGCCAAACCTGCCCACC	37232262	-	P72; RH70; DKFZp761H2016;	NM_006386.3	GI:38201709	non-AUG (CUG) translation initiation codon isoform p82 is encoded by transcript variant 1; probable RNA-dependent helicase p72; DEAD/H (Asp-Glu-Ala-Asp/His) box polypeptide 17 (72kD); go_component: nucleus; go_function: ATP binding; go_function: RNA binding; go_function: hydrolase activity; go_function: nucleotide binding; go_function: RNA helicase activity; go_function: ATP-dependent helicase ac…	DEAD box polypeptide 17 isoform p82	34	TRUE	22:37230719-37233753	-5.55779	-5.69703	-5.38641	-0.310619	0.293816	0.106434	2.76055	0.00631265	0.0401262	-9.33896	-9.69828	-8.97963	-0.718647	0.035861
cg05089059	IMPDH1	7	127.837	3614	-	36.1	NCBI:RefSeq	CGGCGGCGCAGCGGTACAGCGCCCGACTGCTGCAGGCCGGCTACGAGCCC	127837542	-	IMPD; IMPD1; sWSS2608; DKFZp781N0678;	NM_183243.1	GI:34328927	isoform b is encoded by transcript variant 2; go_function: metal ion binding; go_function: catalytic activity; go_function: potassium ion binding; go_function: oxidoreductase activity; go_function: IMP dehydrogenase activity; go_function: IMP dehydrogenase activity; go_process: GTP biosynthesis; go_process: GMP biosynthesis; go_process: visual perception; go_process: sensory perception; go_proces…	inosine monophosphate dehydrogenase 1 isoform b	443	TRUE	7:127836635-127837886	-5.14794	-5.23014	-5.04676	-0.183379	0.166604	0.0606277	2.74798	0.00655021	0.041116	-4.6692	-4.82286	-4.51553	-0.307332	4.59711e-07
cg06034822	USF1	1	159.283	7391	-	36.1	NCBI:RefSeq	CGCCAAGATGGCCTCCCAAATAGCCCTTGTTAAAGATGGCGCCTCCGTCG	159282381	-	UEF; FCHL; MLTF; FCHL1; MLTFI; HYPLIP1;	NM_007122.3	GI:46877100	isoform 1 is encoded by transcript variant 1; major late transcription factor 1; go_component: nucleus; go_component: nucleus; go_function: DNA binding; go_function: transcription regulator activity; go_function: specific RNA polymerase II transcription factor activity; go_process: regulation of transcription; go_process: regulation of transcription; DNA-dependent; go_process: transcription from …	upstream stimulatory factor 1 isoform 1	324	TRUE	1:159281352-159282834	-2.88107	-2.94664	-2.80037	-0.146279	0.20517	0.0599599	3.42178	0.000755729	0.00937605	-3.24809	-3.34507	-3.15111	-0.193961	0.00432013
cg00474209	DLL1	6	170.442	28514	-	36.1	NCBI:RefSeq	AGCTCTCGCCAGATTGGGGGGCTGCTGATTTGCATCTCATTAGCCATGCG	170441398	-	DELTA1;	NM_005618.2	GI:10518496	delta-like 1 protein; delta (Drosophila)-like 1; go_component: membrane; go_component: extracellular region; go_component: integral to plasma membrane; go_function: Notch binding; go_function: Notch binding; go_function: calcium ion binding; go_process: hemopoiesis; go_process: cell communication; go_process: organ morphogenesis; go_process: cell differentiation; go_process: Notch signaling pathw…	delta-like 1	587	TRUE	6:170439971-170443312	-3.99951	-4.0656	-3.91818	-0.147418	0.153167	0.0582855	2.62788	0.00926518	0.0517117	-4.53859	-4.59003	-4.48716	-0.102871	0.017098
cg17815841	SCC-112	4	39.6558	23244	-	36.1	NCBI:RefSeq	CGGACACAAGCGCACACACTCCCGGAGGAGCCTTCGAGGCTGCTCTTCCT	39655881	-	PIG54; FLJ41012; KIAA0648; DKFZp686B19246;	NM_015200.1	GI:22094120	cell proliferation-inducing protein 54; go_function: binding; go_function: protein binding	SCC-112 protein	118	TRUE	4:39654351-39656522	-5.629	-5.71512	-5.523	-0.192126	0.18113	0.0643061	2.81668	0.00534365	0.0360237	-5.9555	-6.00841	-5.9026	-0.105804	0.0293609
cg12480658	ATF2	2	175.741	1386	-	36.1	NCBI:RefSeq	CGGGCTCCTTGTCCAATCATGAGCGCCCGAGTGCTCTTTGATGCCCGTCC	175741143	-	HB16; CREB2; TREB7; CRE-BP1; MGC111558;	NM_001880.2	GI:22538421	cAMP responsive element binding protein 2; formerly; go_component: nucleus; go_function: zinc ion binding; go_function: metal ion binding; go_function: protein dimerization activity; go_function: sequence-specific DNA binding; go_function: transcription coactivator activity; go_function: RNA polymerase II transcription factor activity; go_process: transcription; go_process: regulation of transcri…	activating transcription factor 2	251	TRUE	2:175740313-175741696	-3.73708	-3.83264	-3.61947	-0.21317	0.230359	0.0498318	4.62272	6.8223e-06	0.000290901	-3.82691	-3.92255	-3.73127	-0.191279	0.000716824
cg06830426	RPS5	19	63.5906	6193	+	36.1	NCBI:RefSeq	GGGCCGGGGATCCTAGGGACGGTTCATGGTCTTTCGGGGATAGTGCCCCG	63590448	+		NM_001009.3	GI:71164878	40S ribosomal protein S5; go_component: cytosolic small ribosomal subunit (sensu Eukaryota); go_function: RNA binding; go_function: structural constituent of ribosome; go_process: protein biosynthesis	ribosomal protein S5	133	TRUE	19:63589408-63591119	-4.3562	-4.44671	-4.24479	-0.201928	0.210602	0.0807146	2.60922	0.00976783	0.053545	-4.48901	-4.58932	-4.38869	-0.200628	0.00044989
cg06976977	FLJ38991	4	74.1546	285521	-	36.1	NCBI:RefSeq	CGGTGTAGATGAACTTTACAAGGCGAGAGCTCCCTAAAGAACACCCAGCC	74154336	-	COX18; COX18HS; MGC126733;	NM_001033760.1	GI:76253913	isoform 5 is encoded by transcript variant 5; Cox18Hs1 protein; go_component: membrane; go_component: mitochondrion; go_component: integral to membrane; go_process: protein insertion into membrane	mitochondrial COX18 isoform 5	272	TRUE	4:74153705-74154665	-4.54461	-4.62444	-4.44635	-0.178085	0.202432	0.0743814	2.72154	0.00707694	0.0434166	-5.2021	-5.29624	-5.10796	-0.188273	0.0259311
cg01570086	ARID3B	15	72.6201	10620	+	36.1	NCBI:RefSeq	CTTCCTCAGAGGTTCTCGTGTTTAGATCAGCTTGTCTCTAAACTTCTCCG	72620637	+	BDP; DRIL2;	NM_006465.1	GI:5453637	dead ringer drosophila homolog 2; dead ringer (Drosophila)-like 2 (bright and dead ringer); bright and dead ringer homolog; go_component: nucleus; go_component: intracellular; go_function: DNA binding; go_function: DNA binding; go_process: biological process unknown	AT rich interactive domain 3B (BRIGHT- like) protein	504	TRUE	15:72619750-72621176	-5.06691	-5.19489	-4.90939	-0.285494	0.266235	0.0859114	3.09894	0.00222467	0.0197147	-5.72146	-5.8091	-5.63382	-0.17528	0.0287287
cg17383958	RRAS	19	54.835	6237	-	36.1	NCBI:RefSeq	ACACCCTCCCGGGTGAGGGCCCACTACCTGGATGAACTGGATGGTCAGCG	54835212	-		NM_006270.2	GI:20127497	Oncogene RRAS; go_function: GTP binding; go_function: nucleotide binding; go_function: GTPase activity; go_process: intracellular protein transport; go_process: Ras protein signal transduction	related RAS viral (r-ras) oncogene homolog	176	TRUE	19:54834938-54835823	-4.98386	-5.11851	-4.81813	-0.300385	0.305383	0.095688	3.19145	0.00164646	0.0161778	-6.064	-6.24016	-5.88784	-0.352323	0.00958139
cg10740670	FNTB	14	64.5234	2342	+	36.1	NCBI:RefSeq	CGCGTTGTTGCTTAACGAAGCAGAGTCCTACACACTGTCTGCTGCTCTCC	64523260	+	FPTB; MGC31935;	NM_002028.3	GI:42476119	go_component: cytoplasm; go_function: metal ion binding; go_function: transferase activity; go_function: prenyltransferase activity; go_function: protein farnesyltransferase activity; go_process: protein amino acid farnesylation	farnesyltransferase; CAAX box; beta	110	TRUE	14:64523095-64523942	-5.13787	-5.22557	-5.02993	-0.195643	0.180201	0.0668263	2.69656	0.00760944	0.0454119	-5.2569	-5.32989	-5.1839	-0.145991	0.0491951
cg23230018	F25965	19	40.9314	55957	+	36.1	NCBI:RefSeq	CACAGGGAACATGGTTTGGGTCCGGGATCTGGCTAGCTGGGTCAGAGGCG	40931352	+	MGC9505;	NM_019104.1	GI:28144915	go_function: protein binding	hypothetical protein LOC55957	76	TRUE	19:40931424-40932022	-4.11671	-4.18633	-4.03102	-0.15531	0.181744	0.057367	3.16809	0.00177757	0.0170513	-5.04009	-5.15268	-4.9275	-0.225171	0.00416704
cg11368509	SUV420H2	19	60.5432	84787	+	36.1	NCBI:RefSeq	CGGCCCCAGCCCCGCGCCGCCTTGGCTCCCCAGTCGCCCCCTGCCCCGAC	60543076	+	MGC2705;	NM_032701.2	GI:31543168	synonym: MGC2705	suppressor of variegation 4-20 homolog 2	101	TRUE	19:60541951-60543443	-4.33728	-4.43961	-4.21134	-0.228277	0.225274	0.0647917	3.4769	0.000623416	0.00823029	-3.12177	-3.39588	-2.84767	-0.548208	4.39304e-11
cg19470701	C20orf149	20	61.6231	79144	+	36.1	NCBI:RefSeq	CGCAGATCCCACCAGCCAGCAAGCTAAAGCATGGCGGCCATCCCCTCCAG	61622577	+	MGC2479; FLJ21046; dJ697K14.9;	NM_024299.2	GI:34147371	synonyms: MGC2479; FLJ21046; dJ697K14.9	hypothetical protein LOC79144	499	TRUE	20:61621177-61623765	-5.88954	-6.01936	-5.72976	-0.289597	0.246737	0.0901394	2.73728	0.00675908	0.0420173	-6.06275	-6.23669	-5.88881	-0.347879	0.0167032
cg19903333	ATP6V0B	1	44.214	533	+	36.1	NCBI:RefSeq	AGGAATCTGTCTACACAGCTGTACTGTCACCTGGGGGCAGCCTGAGGACG	44213198	+	ATP6F; HATPL; VMA16;	NM_004047.2	GI:19913434	ATPase; H+ transporting; lysosomal (vacuolar proton pump) 21kD; vacuolar ATP synthase 21 kDa proteolipid subunit; H(+)-transporting two-sector ATPase; subunit F; vacuolar proton pump; 21 kDa subunit; V-ATPase subunit c ; go_component: membrane; go_component: proton-transporting two-sector ATPase complex; go_function: metal ion binding; go_function: hydrolase activity; go_function: transporter act…	ATPase; H+ transporting; lysosomal 21kDa; V0 subunit c	756	TRUE	1:44212598-44213967	-3.53718	-3.61409	-3.44252	-0.171561	0.193963	0.0559353	3.46764	0.00064402	0.00841064	-4.13115	-4.24771	-4.01459	-0.233121	0.00138816
cg15929201	FLJ11193	5	31.5677	55322	+	36.1	NCBI:RefSeq	CGCTAGGCCTGGATCCCGCAAATAAGTGGAAGTGAAAAAGGAGACCTTTC	31568158	+	DKFZp667N066;	NM_018356.1	GI:8922930	synonym: DKFZp667N066	hypothetical protein LOC55322	456	TRUE	5:31567403-31568710	-5.48174	-5.54537	-5.40343	-0.141937	0.189805	0.048637	3.90248	0.00013045	0.00262364	-5.32188	-5.46955	-5.17421	-0.295337	3.24554e-05
cg11221265	SDHC	1	159.551	6391	+	36.1	NCBI:RefSeq	ATGGGTCCTTTCCCTGCCCAGGCACAGGATAAACAGTTATCAGCAAAACG	159550794	+	PGL3; SDH3;	NM_003001.2	GI:9257243	succinate-ubiquinone oxidoreducatase cytochrome B large subunit; paraganglioma or familial glomus tumors 3; go_component: membrane; go_component: integral to membrane; go_component: mitochondrial membrane; go_function: iron ion binding; go_function: metal ion binding; go_function: succinate dehydrogenase activity; go_function: electron transporter activity; go_process: electron transport; go_proc…	succinate dehydrogenase complex; subunit C precursor	109	TRUE	1:159550072-159551402	-4.74418	-4.81	-4.66317	-0.14683	0.170947	0.0650703	2.62712	0.0092853	0.051796	-5.4435	-5.56105	-5.32596	-0.235089	0.0063187
cg14047667	F13A1	6	6.26589	2162	-	36.1	NCBI:RefSeq	CGGACTCGGGAAAGACAAGACAGTTGGCTCTTAAATAACTTCCTAAGAGG	6265901	-	F13A;	NM_000129.2	GI:9961355	TGase; Coagulation factor XIII; A polypeptide; factor XIIIa; bA525O21.1 (coagulation factor XIII; A1 polypeptide); Coagulation factor XIII A chain; go_component: extracellular space; go_function: calcium ion binding; go_function: transferase activity; go_function: acyltransferase activity; go_function: protein-glutamine gamma-glutamyltransferase activity; go_process: blood coagulation; go_process…	coagulation factor XIII A1 subunit precursor	13	TRUE	6:6265594-6265932	-5.64493	-5.78724	-5.46979	-0.317447	0.314824	0.112009	2.81071	0.00543993	0.0364936	-7.06907	-7.16219	-6.97594	-0.186249	0.00888806
cg23618830	ARHGEF12	11	119.713	23365	+	36.1	NCBI:RefSeq	CGGCTTGGAGCAAAACAAGTTATCTCCCAAAACGAACTGAGAAAGCCAGG	119713156	+	LARG; PRO2792; KIAA0382;	NM_015313.1	GI:7662087	leukemia-associated rho guanine nucleotide exchange factor; go_function: protein binding; go_function: GTPase activator activity; go_function: guanyl-nucleotide exchange factor activity	Rho guanine nucleotide exchange factor (GEF) 12	166	TRUE	11:119711510-119713424	-4.26977	-4.35475	-4.16518	-0.189578	0.165382	0.0557791	2.96495	0.00339922	0.0264876	-5.69123	-5.85428	-5.52817	-0.326111	0.000144253
cg06730468	FLJ10922	19	53.5589	55260	-	36.1	NCBI:RefSeq	CGCTGTCTAGACCCCAAAGAAACGTTGTACCACTACAGGGTCTCTGGGCC	53558998	-		NM_018273.2	GI:32171253		hypothetical protein LOC55260	130	TRUE	19:53558866-53559548	-3.74643	-3.823	-3.6522	-0.170799	0.179984	0.046144	3.9005	0.000131445	0.00263338	-3.66506	-3.77243	-3.55769	-0.214744	0.00026313
cg16443939	SPFH1	10	101.935	10613	-	36.1	NCBI:RefSeq	CGGAGCACCCTCCAGATGTTGGACAGTTTTAGTGCTATGTTCGTTTTGTT	101935393	-	KE04; KEO4; C10orf69; RP11-316M21.1;	NM_006459.2	GI:24431956	go_component: membrane	SPFH domain family; member 1	279	TRUE	10:101935008-101935273	-4.613	-4.68655	-4.52246	-0.16409	0.164156	0.0622894	2.63537	0.00906997	0.0509398	-4.66679	-4.77713	-4.55645	-0.220682	0.0210354
cg02566518	FUT11	10	75.202	170384	+	36.1	NCBI:RefSeq	CGGCCAGGACTAAAAGCAAAGTGAGCTTTCGGGAGTAAAGATGAGGCTAA	75202055	+	MGC33202; MGC119338; MGC119339;	NM_173540.1	GI:27734920	go_component: membrane; go_component: Golgi stack; go_component: integral to membrane; go_function: fucosyltransferase activity; go_function: transferase activity; transferring glycosyl groups; go_process: protein amino acid glycosylation	fucosyltransferase 11 (alpha (1;3) fucosyltransferase)	78	TRUE	10:75201868-75203528	-4.57827	-4.66478	-4.47179	-0.192993	0.218464	0.0659851	3.3108	0.0011055	0.0121949	-5.07333	-5.18811	-4.95854	-0.229571	0.000125518
cg03616357	FLJ21159	4	156.517	79884	-	36.1	NCBI:RefSeq	CGCCGCCAGGCCCAGACCAAGGTGAGCAGCTCCTACCCGATGCTTGGCTC	156517572	-		NM_024826.1	GI:13376225		hypothetical protein LOC79884	180	TRUE	4:156516942-156517675	-5.26514	-5.33092	-5.18418	-0.146735	0.183171	0.0660432	2.77351	0.00607573	0.0392379	-5.91513	-6.00691	-5.82334	-0.18357	0.00683004
cg15844609	YIF1B	19	43.4987	90522	-	36.1	NCBI:RefSeq	GGAGTTAGGGGCGTGAGCCCCGGCAAGGGGCAGACACTCATTTTCTGTCG	43498400	-	FinGER8;	NM_033557.1	GI:24308363	isoform 2 is encoded by transcript variant 2	Yip1 interacting factor homolog B isoform 2	286	TRUE	19:43497856-43498973	-4.76519	-4.83132	-4.68379	-0.147529	0.154832	0.0580107	2.66902	0.00823831	0.0478073	-5.09716	-5.1373	-5.05702	-0.0802737	0.0311056
cg07007400	KRT7	12	50.9131	3855	+	36.1	NCBI:RefSeq	AAGCCCAGGCTTTCAGTCCAAGCAGGGATGGTCCGGAGTAGGCAGGAGCG	50913221	+	K7; CK7; SCL; K2C7; MGC3625;	NM_005556.3	GI:67782364	keratin; simple epithelial type I; K7; keratin; type II cytoskeletal 7; cytokeratin 7; sarcolectin; keratin; 55K type II cytoskeletal; type II mesothelial keratin K7; go_component: intermediate filament; go_function: structural molecule activity; go_process: cytoskeleton organization and biogenesis	keratin 7	123	TRUE	12:50912973-50913926	-4.36102	-4.44867	-4.25313	-0.195536	0.178194	0.0683729	2.60621	0.00985106	0.0538865	-2.47704	-2.75559	-2.19848	-0.557102	0.0102377
cg02600515	ZBTB3	11	62.2783	79842	-	36.1	NCBI:RefSeq	CGGACCAATCCGTGACAGGGGAGGGCAATCTTAAGCCAATTAAAGCTGAG	62278190	-	FLJ23392;	NM_024784.2	GI:21314717	go_component: nucleus; go_function: DNA binding; go_function: protein binding; go_function: zinc ion binding; go_function: metal ion binding; go_process: transcription; go_process: regulation of transcription; DNA-dependent	zinc finger and BTB domain containing 3	82	TRUE	11:62277783-62278759	-4.87912	-4.99136	-4.74097	-0.25039	0.227789	0.0773389	2.94533	0.00361256	0.0276583	-6.34993	-6.43404	-6.26582	-0.168223	0.0482138
cg26704579	CYP1A1	15	72.8057	1543	-	36.1	NCBI:RefSeq	GCTAGTGCTTTGATTGGCAGAGCACAGAAATCCGGCGGCGGGGGGCCACG	72804930	-	AHH; AHRR; CP11; CYP1; P1-450; P450-C; P450DX;	NM_000499.2	GI:13325053	aryl hydrocarbon hydroxylase; flavoprotein-linked monooxygenase; cytochrome P1-450; dioxin-inducible; P450 form 6; xenobiotic monooxygenase; microsomal monooxygenase; cytochrome P450; subfamily I (aromatic compound-inducible); polypeptide 1; go_component: membrane; go_component: microsome; go_component: endoplasmic reticulum; go_function: heme binding; go_function: iron ion binding; go_function: …	cytochrome P450; family 1; subfamily A; polypeptide 1	813	TRUE	15:72805201-72806853	-2.81105	-2.89996	-2.70163	-0.198332	0.191269	0.0537559	3.5581	0.000467506	0.00663105	-2.1996	-2.23125	-2.16795	-0.0633067	0.0129651
cg08697285	MYCBP2	13	76.799	23077	-	36.1	NCBI:RefSeq	GAAGGAGGTCGCTGTCTTTGTAGTCTCCCTGCTGCGGGAGCCAGAGGCCG	76799178	-	PAM; FLJ10106; KIAA0916; AC001226.5;	NM_015057.2	GI:56118211	protein associated with Myc; go_component: nucleus; go_component: ubiquitin ligase complex; go_function: ligase activity; go_function: zinc ion binding; go_function: metal ion binding; go_function: ubiquitin-protein ligase activity; go_process: transcription; go_process: protein ubiquitination; go_process: regulation of transcription; DNA-dependent	MYC binding protein 2	164	TRUE	13:76798134-76799404	-3.58953	-3.66986	-3.49067	-0.179191	0.197265	0.0557314	3.53957	0.000499468	0.00694567	-3.60125	-3.69392	-3.50858	-0.185342	0.000464629
cg18485485	DECR1	8	91.0829	1666	+	36.1	NCBI:RefSeq	CGCCGCCTTCCGGCCCGAGTTCTGGAGACTCAACATGAAGCTACCGGCCA	91082756	+	DECR; NADPH;	NM_001359.1	GI:4503300	4-enoyl-CoA reductase; go_component: mitochondrion; go_function: oxidoreductase activity; go_function: 2;4-dienoyl-CoA reductase (NADPH) activity; go_process: metabolism	2;4-dienoyl CoA reductase 1 precursor	107	TRUE	8:91082265-91083649	-5.59924	-5.74656	-5.41791	-0.328652	0.311462	0.113643	2.74071	0.00669143	0.04171	-4.85022	-4.9798	-4.72064	-0.259164	0.00302324
cg05402265	ICK	6	53.0341	22858	-	36.1	NCBI:RefSeq	GGGACAGCCAAGGGCCTAGTCAGGGAAATTCCGAAAGCAAGTCCTCAACG	53034549	-	MRK; LCK2; KIAA0936; MGC46090;	NM_014920.2	GI:27477120	MAK-related kinase; serine/threonine protein kinase; go_function: ATP binding; go_function: nucleotide binding; go_function: transferase activity; go_function: magnesium ion binding; go_function: protein serine/threonine kinase activity; go_process: development; go_process: signal transduction; go_process: protein kinase cascade; go_process: protein amino acid phosphorylation	intestinal cell kinase	471	TRUE	6:53034004-53034928	-4.61166	-4.71465	-4.4849	-0.229756	0.22878	0.0650186	3.51869	0.000537932	0.00732719	-5.10769	-5.17106	-5.04433	-0.126727	0.0067133
cg18502522	SCAMP2	15	72.9527	10066	-	36.1	NCBI:RefSeq	GTTGGTGTCGAAAGCCGACATGGTGATCGGGGGCCAGCGGGCGAACTCCG	72952723	-		NM_005697.3	GI:16445417	go_component: membrane fraction; go_component: integral to membrane; go_process: protein transport; go_process: post-Golgi transport	secretory carrier membrane protein 2	46	TRUE	15:72952229-72953074	-5.59341	-5.6999	-5.46235	-0.237549	0.252639	0.0850704	2.96977	0.00334863	0.0262225	-6.68409	-6.90511	-6.46306	-0.442045	0.000599815
cg17451138	C12orf38	12	122.722	79867	+	36.1	NCBI:RefSeq	TCTGCAGGGCATCCTGAGGCTTCTGTGGGGGGACCTGGGTGTGTACGGCG	122721644	+	TECT2; FLJ12975;	NM_024809.2	GI:31377680	tectonic 2	TECT2	189	TRUE	12:122721380-122721977	-5.72556	-5.85202	-5.56992	-0.282099	0.290249	0.108663	2.67109	0.00818951	0.0476584	-6.15476	-6.58394	-5.72557	-0.858369	0.00896282
cg24719575	REST	4	57.4685	5978	+	36.1	NCBI:RefSeq	TCAAAGCCTGCGGATTCTTCTTTTAACAGCTCTATTCTCATGCATGCACG	57468799	+	XBR; NRSF;	NM_005612.3	GI:15890082	repressor binding to the X2 box; neuron restrictive silencer factor; go_component: nucleus; go_function: DNA binding; go_function: zinc ion binding; go_function: metal ion binding; go_function: transcriptional repressor activity; go_process: regulation of transcription; DNA-dependent	RE1-silencing transcription factor	274	TRUE	4:57467957-57470515	-5.04819	-5.11215	-4.96947	-0.14268	0.216548	0.0744258	2.90958	0.00403313	0.0298571	-5.33446	-5.44735	-5.22158	-0.225766	0.022177
cg04735745	ZBED3	5	76.4186	84327	-	36.1	NCBI:RefSeq	TGAGTGTGGGCTTCCAGACTCGGTGGCGAGGCGGGCTGGGCCGGGCAGCG	76418786	-	MGC15435;	NM_032367.1	GI:14150184	2610005H11Rik; go_function: DNA binding; go_function: zinc ion binding; go_function: metal ion binding	zinc finger; BED domain containing 3	145	TRUE	5:76418340-76419081	-5.46456	-5.56771	-5.3376	-0.230109	0.233658	0.0757613	3.08413	0.00233302	0.0204462	-5.06098	-5.23382	-4.88815	-0.345672	6.78049e-05
cg19118533	TRAF3IP2	6	112.034	10758	-	36.1	NCBI:RefSeq	AGAAGCTGCCCAGGAGTGGGCAGAACCTCAGTGTAGTCGCAGTGCCCTCG	112034014	-	ACT1; CIKS; C6orf4; C6orf5; C6orf6; MGC3581; DKFZP586G0522;	NM_147200.1	GI:22538425	isoform 1 is encoded by transcript variant 1; connection to IKK and SAPK/JNK; NFkB-activating protein ACT1; go_component: cellular component unknown; go_function: signal transducer activity; go_process: intracellular signaling cascade; go_process: positive regulation of I-kappaB kinase/NF-kappaB cascade	TRAF3 interacting protein 2 isoform 1	2	TRUE	6:112033981-112034519	-4.83631	-4.96033	-4.68367	-0.276659	0.26958	0.0860323	3.13347	0.00198982	0.0184513	-5.82092	-5.93981	-5.70202	-0.237787	0.000134579
cg13098382	RNF38	9	36.3915	152006	-	36.1	NCBI:RefSeq	TCAAACAGTAACTGACCTCACGTAGTTCTTACAGCATAAATGCATTCACG	36391195	-	FLJ21343;	NM_022781.3	GI:37577174	isoform 1 is encoded by transcript variant 1; go_component: ubiquitin ligase complex; go_function: zinc ion binding; go_function: metal ion binding; go_function: ubiquitin-protein ligase activity; go_process: protein ubiquitination	ring finger protein 38 isoform 1	265	TRUE	9:36390127-36391489	-5.25633	-5.3513	-5.13944	-0.211853	0.189052	0.0690307	2.73867	0.00673154	0.041922	-5.3288	-5.38702	-5.27058	-0.116447	0.0444512
cg03138405	GLT25D1	19	17.5271	79709	+	36.1	NCBI:RefSeq	GAGGCTAAGGTCTCTTGGGTCCCAAACCAGGTCCTAAGTAGCCAAGTCCG	17527511	+	FLJ22329; MGC117270;	NM_024656.2	GI:31377696	go_function: transferase activity; go_process: lipopolysaccharide biosynthesis	glycosyltransferase 25 domain containing 1	361	TRUE	19:17527061-17528096	-5.12115	-5.22836	-4.9892	-0.239162	0.215411	0.0740297	2.9098	0.00403046	0.029848	-6.62046	-6.75888	-6.48203	-0.276853	0.0398225
cg09902130	CD6	11	60.4958	923	+	36.1	NCBI:RefSeq	CGCATGCGATCAAACCCAACCTGTGAGTGTCTCACGCCTGCTTGTTCTGC	60495750	+	TP120;	NM_006725.2	GI:51036597	go_component: membrane; go_component: cell surface; go_component: integral to plasma membrane; go_function: protein binding; go_function: scavenger receptor activity; go_process: cell adhesion; go_process: immune response	CD6 antigen	4	FALSE		-5.5266	-5.62386	-5.4069	-0.216959	0.265493	0.0806892	3.29032	0.00118467	0.0127606	-4.86093	-5.1469	-4.57495	-0.571956	3.24554e-05
cg20008332	SOX11	2	5.75062	6664	+	36.1	NCBI:RefSeq	CGGCTCAAGCACATGGCCGACTACCCCGACTACAAGTACCGGCCCCGGAA	5750250	+		NM_003108.3	GI:30581115	SRY (sex-determining region Y)-box 11; SRY-related HMG-box gene 11; transcription factor SOX-11; go_component: nucleus; go_function: DNA binding; go_process: transcription; go_process: nervous system development; go_process: regulation of transcription; DNA-dependent	SRY-box 11	370	TRUE	2:5748447-5751811	-6.16282	-6.2772	-6.02203	-0.25517	0.288705	0.0812551	3.55307	0.000475978	0.00672344	-1.96581	-2.40866	-1.52295	-0.88571	0.00109169
cg04525496	CSPG2	5	82.8033	1462	+	36.1	NCBI:RefSeq	CGGTACAGTGATATAATGATGATGGGTGTCACAACCCGCATTTGAACTTG	82803339	+	VERSICAN; DKFZp686K06110;	NM_004385.2	GI:21361115	go_component: extracellular matrix (sensu Metazoa); go_function: sugar binding; go_function: calcium ion binding; go_function: hyaluronic acid binding; go_process: development; go_process: cell recognition	chondroitin sulfate proteoglycan 2 (versican)	57	TRUE	5:82803218-82803679	-5.13037	-5.1938	-5.05231	-0.141487	0.170094	0.0525356	3.23769	0.00141286	0.0145635	-4.94346	-5.06767	-4.81925	-0.248416	0.00087251
cg08966023	PPP1R3D	20	57.9487	5509	-	36.1	NCBI:RefSeq	AGGCTCGCTAGGAAGTTGCACCCGGTCAAGTTGCAGCCTTGTAAGTAACG	57948747	-	PPP1R6;	NM_006242.3	GI:37622904	protein phosphatase 1; regulatory subunit 6; spinophilin; go_function: hydrolase activity; go_function: phosphoprotein phosphatase activity; go_function: protein phosphatase type 1 activity; go_process: glycogen metabolism; go_process: carbohydrate metabolism	protein phosphatase 1; regulatory subunit 3D	7	TRUE	20:57947345-57949206	-3.77745	-3.869	-3.66478	-0.204227	0.208316	0.0745798	2.7932	0.00573114	0.0377222	-4.19636	-4.34087	-4.05185	-0.289016	9.14076e-05
cg12598364	GCAT	22	36.5336	23464	+	36.1	NCBI:RefSeq	TGCCTTTGGGGTCCAGAGGGTACCCCATTTCCGGCCGAGAGGTGAGTACG	36533901	+	KBL; MGC23053;	NM_014291.2	GI:22035688	2-amino-3-ketobutyrate-CoA ligase; AKB ligase; aminoacetone synthase; go_component: mitochondrion; go_function: ligase activity; go_function: acyltransferase activity; go_function: glycine C-acetyltransferase activity; go_function: glycine C-acetyltransferase activity; go_function: transferase activity; transferring nitrogenous groups; go_process: biosynthesis; go_process: amino acid metabolism	glycine C-acetyltransferase precursor	278	TRUE	22:36533345-36534339	-5.27107	-5.36006	-5.16155	-0.19851	0.202249	0.0737424	2.74264	0.00665371	0.0415252	-6.16756	-6.28325	-6.05186	-0.231398	0.00432013
cg10519140	SLC29A1	6	44.2951	2030	+	36.1	NCBI:RefSeq	CGGTTTCCTTCGGGAGTCTTCAAAGCCAGTGCACGTGCTCCCAGGTCTCA	44295371	+	ENT1;	NM_004955.1	GI:4826715	go_component: membrane; go_component: membrane fraction; go_component: integral to plasma membrane; go_function: protein binding; go_function: nucleoside transporter activity; go_process: transport; go_process: nucleoside transport; go_process: nucleobase; nucleoside; nucleotide and nucleic acid metabolism	solute carrier family 29 (nucleoside transporters); member 1	317	TRUE	6:44295023-44295708	-4.47898	-4.55488	-4.38557	-0.169311	0.191239	0.0459078	4.16573	4.63242e-05	0.00122471	-3.69186	-3.87191	-3.51181	-0.360105	3.02107e-08
cg12452010	C10orf22	10	64.2344	84890	+	36.1	NCBI:RefSeq	CGGCCTTCCGCTTGAGCTCTGAGATAGTTCAGTTTGTTGATTGGAAAATA	64234522	+	FLJ14547;	NM_032804.5	GI:62177109	synonym: FLJ14547	hypothetical protein LOC84890	72	TRUE	10:64234130-64235613	-4.25153	-4.30944	-4.18026	-0.129176	0.125436	0.0482828	2.59795	0.0100829	0.0547476	-4.53007	-4.60705	-4.45309	-0.153957	0.000500789
cg22186533	EEF1D	8	144.752	1936	-	36.1	NCBI:RefSeq	CGCTGAGTGCCCACCTCACCGCCCAGCTGCTCCAGGAACCAGCGCAGCTT	144750726	-	EF-1D; FP1047; FLJ20897;	NM_001960.2	GI:25453471	isoform 2 is encoded by transcript variant 2; guanine nucleotide exchange protein; go_component: eukaryotic translation elongation factor 1 complex; go_component: eukaryotic translation elongation factor 1 complex; go_function: signal transducer activity; go_function: signal transducer activity; go_function: translation elongation factor activity; go_function: guanyl-nucleotide exchange factor ac…	eukaryotic translation elongation factor 1 delta isoform 2	827	TRUE	8:144750028-144752852	-4.2959	-4.41523	-4.14904	-0.266186	0.252252	0.0596065	4.23195	3.54203e-05	0.00100479	-4.26992	-4.47207	-4.06777	-0.404309	4.73782e-06
cg06655504	GDPD1	17	54.6525	284161	+	36.1	NCBI:RefSeq	TGCAAGCTTTCTCTTCATGAGGGTCCGTCCACAGAGCTAGGTGACAAACG	54652616	+	UGPQ; FLJ37451; MGC35046;	NM_182569.1	GI:32698961	go_function: glycerophosphodiester phosphodiesterase activity; go_process: glycerol metabolism	glycerophosphodiester phosphodiesterase domain containing 1	116	TRUE	17:54652359-54653533	-5.35428	-5.49052	-5.18658	-0.303939	0.297094	0.101819	2.91787	0.00393175	0.0293491	-6.55021	-6.96952	-6.13091	-0.838602	3.81638e-05
cg16312163	ALDH1L1	3	127.382	10840	-	36.1	NCBI:RefSeq	CGGGTCTGCACCAACCTCAGTTTCGGGGCTGCGGCTCACAGAAGTCTAAC	127382175	-	FTHFD; DKFZp781N0997;	NM_012190.2	GI:21614512	formyltetrahydrofolate dehydrogenase; go_component: cytoplasm; go_function: cofactor binding; go_function: oxidoreductase activity; go_function: electron transporter activity; go_function: methionyl-tRNA formyltransferase activity; go_function: formyltetrahydrofolate dehydrogenase activity; go_function: hydroxymethyl-; formyl- and related transferase activity; go_process: biosynthesis; go_process…	aldehyde dehydrogenase 1 family; member L1	84	TRUE	3:127381237-127382730	-4.98689	-5.09981	-4.84791	-0.2519	0.257986	0.0740023	3.48619	0.000603374	0.00801709	-5.03839	-5.22628	-4.85051	-0.37577	0.00103782
cg03751414	AP1S1	7	100.585	1174	+	36.1	NCBI:RefSeq	CGCACAGCCTACCATCCTGCAGCCTCCGGCTCGGCGCGTCCCACTTCGGC	100584487	+	AP19; CLAPS1; SIGMA1A;	NM_001283.2	GI:16950626	isoform 1 is encoded by transcript variant 1; clathrin-associated/assembly/adaptor protein; small 1 (19kD); AP1S1adaptor-related protein complex 1; sigma 1 subunit; H_DJ0747G18.2; WUGSC:H_DJ0747G18.2; match to BAA33391 (PID:g3641678); clathrin coat assembly protein AP19; go_component: coated pit; go_component: Golgi stack; go_component: Golgi trans face; go_component: AP-1 adaptor complex; go_com…	adaptor-related protein complex 1; sigma 1 subunit isoform 1	42	TRUE	7:100583628-100585194	-4.31666	-4.40266	-4.21081	-0.191851	0.264614	0.0905021	2.92385	0.0038602	0.0289726	-5.03363	-5.12845	-4.93881	-0.189636	0.0293609
cg18265887	RAC2	22	35.9702	5880	-	36.1	NCBI:RefSeq	CGCCCGCAGAAACGCGCCTGGCCCTGAGCTGTCACCACCGACACTCTCCA	35970251	-	Gx; EN-7; HSPC022;	NM_002872.3	GI:27881480	rho family; small GTP binding protein Rac2; Ras-related C3 botulinum toxin substrate 3 (rho family; small GTP-binding protein Rac2); small G protein; go_function: GTP binding; go_function: nucleotide binding; go_function: GTPase activity; go_function: protein binding; go_process: signal transduction; go_process: small GTPase mediated signal transduction	ras-related C3 botulinum toxin substrate 2	55	TRUE	22:35970109-35970351	-3.9243	-3.99446	-3.83794	-0.156525	0.164456	0.062286	2.64033	0.00894284	0.050515	-3.90379	-4.03029	-3.77729	-0.253001	5.38589e-05
cg02307482	C12orf60	12	14.8473	144608	+	36.1	NCBI:RefSeq	CGGCTGACCGACCATGACTCGAGGTACAAGACGTCAAACCTAAGGCTACT	14847773	+	MGC47869;	NM_175874.2	GI:31343594	synonym: MGC47869	hypothetical protein LOC144608	500	TRUE	12:14847146-14847918	-4.93736	-5.06587	-4.7792	-0.28667	0.313029	0.113167	2.76608	0.00621052	0.0398336	-7.31254	-7.51835	-7.10673	-0.411619	0.00974186
cg08974656	TMEM127	2	96.2953	55654	-	36.1	NCBI:RefSeq	CGCACAGGTCGCACCCCAAACCGCCGGTCCCAGATCACGGGTCCCCGATC	96295459	-	FLJ20507; FLJ22257;	NM_017849.1	GI:8923465	synonyms: FLJ20507; FLJ22257	hypothetical protein LOC55654	165	TRUE	2:96294501-96296204	-6.52582	-6.67629	-6.34063	-0.335661	0.289074	0.106735	2.70833	0.00735436	0.0444173	-8.76648	-8.92704	-8.60592	-0.321121	0.0547164
cg07123069	HOXC11	12	52.6535	3227	+	36.1	NCBI:RefSeq	CGGCCTGGAGCCATCCGGCAAGTGGCACCATCGGAACAGCTACTCCTCCT	52653196	+	HOX3H; MGC4906;	NM_014212.2	GI:24497534	homeobox protein Hox-C11; go_component: nucleus; go_function: transcription factor activity; go_function: RNA polymerase II transcription factor activity; go_process: development; go_process: endoderm development; go_process: regulation of transcription; DNA-dependent	homeo box C11	321	TRUE	12:52652893-52656105	-4.39774	-4.48829	-4.2863	-0.201986	0.177472	0.0648555	2.73642	0.00677597	0.0420969	-1.84425	-2.1608	-1.52771	-0.633089	0.00416704
cg16160720	RASA1	5	86.5995	5921	+	36.1	NCBI:RefSeq	CGAGGAAATCGACTGAACTGCTCACTACCTGGAGCTCTCAGTGAGTGAAA	86599907	+	GAP; PKWS; RASA; CMAVM; RASGAP; p120GAP; DKFZp434N071;	NM_022650.1	GI:12545405	isoform 2 is encoded by transcript variant 2; GTPase activating protein; triphosphatase-activating protein; go_component: cytoplasm; go_function: GTPase activity; go_function: receptor binding; go_function: receptor binding; go_function: GTPase inhibitor activity; go_function: Ras GTPase activator activity; go_function: potassium channel inhibitor activity; go_process: cytokinesis; go_process: ce…	RAS p21 protein activator 1 isoform 2	407	TRUE	5:86598928-86600264	-5.57708	-5.65322	-5.48337	-0.169855	0.171005	0.0497011	3.44066	0.000707704	0.00896934	-4.66899	-4.83705	-4.50094	-0.336108	4.3036e-09
cg24121436	RTN1	14	59.4074	6252	-	36.1	NCBI:RefSeq	CGTGCCCAGGAGGACCCGGACCAAGCAGGCCATTTTCACCTGCGTAATAA	59407310	-	NSP; MGC133250;	NM_021136.2	GI:45827774	isoform A is encoded by transcript variant 1; neuroendocrine-specific protein; go_component: membrane; go_component: integral to membrane; go_component: endoplasmic reticulum; go_component: integral to endoplasmic reticulum membrane; go_function: signal transducer activity; go_process: signal transduction; go_process: neuron differentiation	reticulon 1 isoform A	133	TRUE	14:59406238-59407558	-5.37812	-5.46539	-5.27072	-0.194664	0.211305	0.0742729	2.84499	0.00490821	0.0338642	-4.77031	-4.8626	-4.67802	-0.184578	0.00830976
cg01246405	STIM1	11	3.83314	6786	+	36.1	NCBI:RefSeq	GAGTGGAGCAGCACCAAGGCCCGGAGATCGGGGCAGGGCAGCTGCTGTCG	3833509	+	GOK; D11S4896E;	NM_003156.2	GI:21070996	go_component: integral to plasma membrane; go_function: protein binding; go_process: cell cycle; go_process: cell-cell adhesion; go_process: positive regulation of cell proliferation; go_process: negative regulation of progression through cell cycle	stromal interaction molecule 1 precursor	371	TRUE	11:3832683-3834023	-2.98723	-3.0655	-2.8909	-0.174607	0.168196	0.0581708	2.89142	0.00426347	0.0309831	-3.17228	-3.31476	-3.0298	-0.284956	0.000659343
cg00995327	CHST2	3	144.322	9435	+	36.1	NCBI:RefSeq	CTGGGTTTCCTTGCCTAGAGCTGTGTGTTCGGGGTCCTTTGGTCCAGTCG	144321358	+	C6ST;	NM_004267.3	GI:71067350	carbohydrate (chondroitin 6/keratan) sulfotransferase 2; N-acetylglucosamine 6-O-sulfotransferase; go_component: Golgi stack; go_component: Golgi trans face; go_component: integral to membrane; go_component: intrinsic to Golgi membrane; go_function: transferase activity; go_function: N-acetylglucosamine 6-O-sulfotransferase activity; go_function: N-acetylglucosamine 6-O-sulfotransferase activity;…	carbohydrate (N-acetylglucosamine-6-O) sulfotransferase 2	179	TRUE	3:144320056-144323848	-4.22799	-4.30965	-4.12749	-0.182154	0.164495	0.0570491	2.88339	0.00436912	0.0313745	-4.0433	-4.12661	-3.95998	-0.166637	0.00162531
cg21380842	KCNJ6	21	38.2107	3763	-	36.1	NCBI:RefSeq	GCATGGGCGGCGGGGTGGGCGTCTCTGGGTCTGTGGCTCTGTCCTGCTCG	38210566	-	BIR1; GIRK2; KATP2; KCNJ7; KIR3.2; hiGIRK2; MGC126596;	NM_002240.2	GI:25121967	inward rectifier potassium channel KIR3.2; G protein-activated inward rectifier potassium channel 2; go_component: membrane; go_component: integral to membrane; go_component: voltage-gated potassium channel complex; go_function: potassium ion binding; go_function: potassium channel activity; go_function: voltage-gated ion channel activity; go_function: G-protein activated inward rectifier potassi…	potassium inwardly-rectifying channel J6	134	TRUE	21:38209676-38211011	-5.98761	-6.09408	-5.85658	-0.237504	0.248382	0.093713	2.65046	0.00868817	0.0495659	-4.90559	-5.07779	-4.73339	-0.344399	0.0101536
cg11276280	TBCC	6	42.8215	6903	-	36.1	NCBI:RefSeq	CGGCCTCTCGGCTCCAGGGGCTGCAGAAACTAATCAACGACTCAGTTTTT	42821812	-	CFC;	NM_003192.1	GI:4507372	go_component: membrane; go_component: microtubule; go_component: cytoskeleton; go_function: chaperone binding; go_function: unfolded protein binding; go_process: protein folding; go_process: beta-tubulin folding; go_process: post-chaperonin tubulin folding pathway	beta-tubulin cofactor C	283	TRUE	6:42820762-42822144	-3.83187	-3.929	-3.71232	-0.216683	0.211737	0.0469505	4.50978	1.11029e-05	0.000418034	-4.06478	-4.1551	-3.97445	-0.180653	0.00257827
cg24762359	ATP12A	13	24.1524	479	+	36.1	NCBI:RefSeq	GGTCTCTAGGGGGCGGGTCCGGCATCCAGGTGAGTACAGCCCTGGTTCCG	24152695	+	ATP1AL1;	NM_001676.3	GI:55743068	ATPase; Na+K+ transporting; alpha-1 polypeptide-like; ATPase; Na+/K+ transporting; alpha polypeptide-like 1; potassium-transporting ATPase alpha chain 2; proton pump; non-gastric H(+)/K(+) ATPase alpha subunit; sodium/potassium ATPase; alpha polypeptide-like; go_component: membrane; go_component: integral to membrane; go_component: hydrogen:potassium-exchanging ATPase complex; go_function: ATP bi…	ATPase; H+/K+ transporting; nongastric; alpha polypeptide	248	TRUE	13:24152249-24153371	-5.41397	-5.5339	-5.26635	-0.267553	0.220144	0.0809433	2.71974	0.0071143	0.0436198	-5.29396	-5.57566	-5.01227	-0.563393	0.0126558
cg00276797	SLK	10	105.717	9748	+	36.1	NCBI:RefSeq	TCCCAGATCCAGAATGGAGACAACATCCGCTAGCACAATCAACAGGGTCG	105717460	+	STK2; se20-9; KIAA0204; bA16H23.1;	NM_014720.2	GI:41281452	Ste20-like kinase; SNF1 (sucrose nonfermenting; yeast; homolog)-like kinase; SNF1 sucrose nonfermenting like kinase (yeast); Ste20-related serine/threonine kinase; CTCL tumor antigen se20-9; go_function: ATP binding; go_function: DNA binding; go_function: nuclease activity; go_function: protein serine/threonine kinase activity; go_process: nucleotide-excision repair; go_process: protein amino aci…	serine/threonine kinase 2	856	TRUE	10:105715755-105717859	-4.94983	-5.02701	-4.85483	-0.172179	0.185025	0.0645587	2.866	0.00460615	0.0324876	-6.14003	-6.26716	-6.01289	-0.254269	0.0177742
cg12924408	RABL4	22	35.502	11020	-	36.1	NCBI:RefSeq	GTAGGGCTGTGCTGAGGGGCTGGGCGGGGAGCACAGGCCGTGTCCGCTCG	35502060	-	RAYL;	NM_006860.2	GI:9257237	go_function: GTP binding; go_function: nucleotide binding; go_process: protein transport; go_process: small GTPase mediated signal transduction	RAB; member of RAS oncogene family-like 4	89	TRUE	22:35501557-35502955	-5.39566	-5.52179	-5.24044	-0.281346	0.278924	0.0774219	3.60265	0.000398359	0.00592361	-6.02003	-6.1262	-5.91386	-0.21234	0.00919048
cg18123596	PIP5K2B	17	34.2098	8396	-	36.1	NCBI:RefSeq	CGCAGCAAGGGGAAGAGAAAGTCCAGCCTAGAAAGCCAAGGAACGCCCCC	34209684	-	Pip4k2B; PIP5KIIB;	NM_138687.1	GI:20336255	isoform b is encoded by transcript variant 2; 1-phosphatidylinositol-4-phosphate kinase; diphosphoinositide kinase; PTDINS(4)P-5-kinase; go_component: membrane; go_component: endoplasmic reticulum; go_function: kinase activity; go_function: transferase activity; go_function: receptor signaling protein activity; go_function: 1-phosphatidylinositol-4-phosphate 5-kinase activity; go_process: cell su…	phosphatidylinositol-4-phosphate 5-kinase type II beta isoform b	106	TRUE	17:34208696-34210085	-5.2379	-5.35417	-5.09481	-0.259355	0.244624	0.0689005	3.55039	0.000480559	0.0067742	-5.67947	-5.76084	-5.5981	-0.162732	0.00659836
cg09847234	NCK1	3	138.064	4690	+	36.1	NCBI:RefSeq	TACCAAACATATTACAACTCAAGTCAAAAGTTCACAGCCCCAGCAACTCG	138063763	+	NCK; MGC12668; NCKalpha;	NM_006153.3	GI:33519482	NCK tyrosine kinase; non-catalytic region of tyrosine kinase; SH2/SH3 adaptor protein NCK-alpha; melanoma NCK protein; go_component: cytoplasm; go_function: receptor binding; go_function: cytoskeletal adaptor activity; go_function: receptor signaling complex scaffold activity; go_process: T cell activation; go_process: signal complex formation; go_process: intracellular signaling cascade; go_proc…	NCK adaptor protein 1	704	TRUE	3:138063405-138064558	-3.00683	-3.0752	-2.92267	-0.152532	0.184805	0.0492114	3.75532	0.000227555	0.00393823	-3.2646	-3.31624	-3.21296	-0.103283	0.00439858
cg17380128	DDX17	22	37.2327	10521	-	36.1	NCBI:RefSeq	AGACAATAACCGTCCTCCATATTGTTATCAAGTTTCAGAGTCCTCTGGCG	37232262	-	P72; RH70; DKFZp761H2016;	NM_006386.3	GI:38201709	non-AUG (CUG) translation initiation codon isoform p82 is encoded by transcript variant 1; probable RNA-dependent helicase p72; DEAD/H (Asp-Glu-Ala-Asp/His) box polypeptide 17 (72kD); go_component: nucleus; go_function: ATP binding; go_function: RNA binding; go_function: hydrolase activity; go_function: nucleotide binding; go_function: RNA helicase activity; go_function: ATP-dependent helicase ac…	DEAD box polypeptide 17 isoform p82	441	TRUE	22:37230719-37233753	-5.32632	-5.41296	-5.21967	-0.193293	0.18977	0.0700266	2.70997	0.00731921	0.044309	-5.48887	-5.65216	-5.32559	-0.326572	0.000362247
cg12789833	FBXO22	15	73.9829	26263	+	36.1	NCBI:RefSeq	GGCTTATGTCTGTAATTCCAGCACCTTGGGAGGCCCAGGCGGGAGTATCG	73983255	+	FBX22; FLJ13986;	NM_012170.2	GI:22547147	isoform b is encoded by transcript variant 2; F-box only protein 22; go_process: ubiquitin cycle	F-box only protein 22 isoform b	324	TRUE	15:73982856-73984665	-2.5754	-2.67005	-2.45891	-0.211135	0.183972	0.0529955	3.47147	0.000635428	0.00833544	-2.72966	-2.84652	-2.6128	-0.233714	0.0213562
cg17839278	MTCH2	11	47.621	23788	-	36.1	NCBI:RefSeq	CGGCAGAGGCAAGGTCAGAGGACTGAAAAGAAATTGAAAAGGATTCTTCA	47620640	-	HSPC032;	NM_014342.2	GI:40254847	2310034D24Rik; go_component: mitochondrion; go_component: inner membrane; go_component: integral to membrane; go_function: binding; go_process: transport	mitochondrial carrier homolog 2	311	TRUE	11:47620050-47621040	-4.59708	-4.64673	-4.53598	-0.110751	0.144505	0.0556506	2.59665	0.01012	0.0548913	-4.96523	-5.14811	-4.78235	-0.365757	2.93562e-05
cg22425806	TGFA	2	70.6351	7039	-	36.1	NCBI:RefSeq	TCTTCATTGATTCAGGGGACCACTTTCCTTGAGCCAAGTCTTGGCAAGCG	70634438	-	TFGA;	NM_003236.1	GI:4507460	transforming growth factor-alpha; go_component: soluble fraction; go_component: extracellular space; go_component: plasma membrane; go_component: integral to plasma membrane; go_function: protein binding; go_function: growth factor activity; go_function: signal transducer activity; go_function: signal transducer activity; go_function: protein-tyrosine kinase activity; go_function: epidermal growt…	transforming growth factor; alpha	646	TRUE	2:70633222-70635161	-4.22272	-4.28572	-4.14519	-0.140527	0.117566	0.0449289	2.61672	0.00956278	0.0528004	-3.26817	-3.3753	-3.16103	-0.214266	0.049526
cg22385477	KM-HN-1	4	186.63	256309	-	36.1	NCBI:RefSeq	CGGCTCCCCGCTCGAAAACCCGGGACATCCCGGGTCCGCCCTTCTGCACT	186629871	-	KMHN1; MGC33607;	NM_152775.1	GI:22749514	synonyms: KMHN1; MGC33607	KM-HN-1 protein	123	TRUE	4:186628607-186630329	-3.15909	-3.24256	-3.05636	-0.186199	0.18743	0.0640933	2.92433	0.00385442	0.0289503	-3.69823	-3.84122	-3.55524	-0.28598	0.000747279
cg21091629	FRAG1	11	3.78611	27315	+	36.1	NCBI:RefSeq	CGCAGCTGAGAGGTAAGGCGACAAGGTGGCTTATCCAACATGCTCAAACT	3786360	+	PGAP2; MGC799;	NM_014489.1	GI:7657101	go_component: integral to membrane; go_function: receptor activity	FGF receptor activating protein 1	250	TRUE	11:3785869-3786630	-5.61822	-5.70049	-5.51695	-0.183543	0.177963	0.0630622	2.82202	0.00525897	0.0356161	-4.97296	-5.1916	-4.75431	-0.437298	1.76384e-07
cg01124961	RC74	8	28.8034	55756	-	36.1	NCBI:RefSeq	CGCTTCCTGGGTTTGAGGAGTTCAGTGACTGCTATTGAACCACCAAAAGT	28803398	-	RC-74; FLJ10871;	NM_018250.1	GI:8922725	related to CPSF subunits 74 kDa	integrator complex subunit 9	26	TRUE	8:28803201-28803732	-4.71772	-4.76775	-4.65614	-0.111606	0.139327	0.0519554	2.68166	0.00794404	0.0467584	-4.36007	-4.52699	-4.19316	-0.333824	8.11611e-05
cg09628199	TSNARE1	8	143.483	203062	-	36.1	NCBI:RefSeq	AACGAGGAAACTGAGTCTCAAGACATCTGAGGGACCTTTGCCCGAGGTCG	143482444	-	FLJ31164;	NM_145003.1	GI:21450718	go_component: integral to membrane	hypothetical protein LOC203062	577	TRUE	8:143481875-143483098	-5.32285	-5.48985	-5.11732	-0.37253	0.401921	0.0992301	4.05039	7.33701e-05	0.00170934	-6.37739	-6.45551	-6.29927	-0.156238	0.044755
cg11856093	ARID1A	1	26.896	8289	+	36.1	NCBI:RefSeq	CAGGCCAGGGCTTTGTTGTCCGCCATGTTGTTGGTGGAAGACGGCGGCCG	26895112	+	B120; P270; BM029; BAF250; C1orf4; BAF250a; SMARCF1;	NM_006015.3	GI:21264564	isoform a is encoded by transcript variant 1; SWI/SNF related; matrix associated; actin dependent regulator of chromatin; subfamily f; member 1; brain protein 120; SWI/SNF complex protein p270; BRG1-associated factor 250a; chromatin remodeling factor p250; OSA1 nuclear protein; AT rich interactive domain 1A (SWI-like); go_component: nucleus; go_component: intracellular; go_component: SWI/SNF comp…	AT rich interactive domain 1A (SWI- like) isoform a	863	TRUE	1:26894170-26896721	-3.54274	-3.64089	-3.42194	-0.218947	0.234809	0.0573056	4.09749	6.08798e-05	0.00149442	-4.21129	-4.29395	-4.12863	-0.165319	0.00307996
cg11574612	CYP39A1	6	46.7285	51302	-	36.1	NCBI:RefSeq	CTGTAGCTTCCTTCCTCTGTCCCAGTTTTCAGGTGATTTTTCCATTGTCG	46728482	-		NM_016593.3	GI:32313586	oxysterol 7alpha-hydroxylase; cytochrome P450; subfamily XXXIX (oxysterol 7 alpha-hydroxylase); polypeptide 1; go_component: membrane; go_component: microsome; go_component: endoplasmic reticulum; go_function: heme binding; go_function: iron ion binding; go_function: metal ion binding; go_function: monooxygenase activity; go_function: electron transporter activity; go_function: oxysterol 7-alpha-…	cytochrome P450; family 39; subfamily A; polypeptide 1	21	TRUE	6:46728351-46729284	-4.86556	-4.94558	-4.76708	-0.1785	0.184151	0.0488582	3.76909	0.00021616	0.00378877	-4.70308	-4.81806	-4.58811	-0.229952	0.00036622
cg01352882	STUB1	16	0.670131	10273	+	36.1	NCBI:RefSeq	CGCGCTCCCGCAACAGCCTGTCCCGACCACCTGGGGTTCCGCCCCTGTCC	670116	+	CHIP; UBOX1; HSPABP2; NY-CO-7; SDCCAG7;	NM_005861.2	GI:56181386	serologically defined colon cancer antigen 7; heat shock protein A binding protein 2 (c-terminal); go_component: ubiquitin ligase complex; go_component: ubiquitin conjugating enzyme complex; go_function: ligase activity; go_function: SMAD binding; go_function: Hsp70 protein binding; go_function: protein binding; bridging; go_function: ubiquitin-protein ligase activity; go_process: protein folding…	STIP1 homology and U-box containing protein 1	15	TRUE	16:669403-671740	-5.89102	-6.05713	-5.68657	-0.370557	0.322754	0.114878	2.80955	0.00545874	0.0365721	-9.24415	-9.566	-8.9223	-0.643695	0.0482137
cg14914982	CCND2	12	4.25325	894	+	36.1	NCBI:RefSeq	AGGCGAGGATTGGGTGGTGGGCGAGCAGAGCCTCGGGGCTGCCTCACTCG	4253199	+	KIAK0002; MGC102758;	NM_001759.2	GI:16950656	G1/S-specific cyclin D2; go_component: nucleus; go_function: protein binding; go_process: cell cycle; go_process: cell division; go_process: regulation of progression through cell cycle	cyclin D2	47	TRUE	12:4252826-4255273	-4.34157	-4.39978	-4.26992	-0.129852	0.165491	0.0575603	2.87509	0.00448088	0.0319431	-4.53423	-4.63112	-4.43735	-0.193765	0.00126922
cg10911877	PAFAH1B1	17	2.44303	5048	+	36.1	NCBI:RefSeq	CGGATGCCCAAAGAAAGGCCTGGAACTGTATCCCTATAAGGGATGTCTGT	2443686	+	LIS1; MDCR; PAFAH;	NM_000430.2	GI:6031206	Platelet-activating factor acetylhydrolase; isoform 1B; alpha subunit; lissencephaly 1 protein; go_component: microtubule; go_component: cytoskeleton; go_component: cell cortex; go_component: kinetochore; go_component: kinetochore; go_component: kinetochore; go_component: nuclear membrane; go_component: astral microtubule; go_component: microtubule associated complex; go_function: dynein binding;…	platelet-activating factor acetylhydrolase; isoform Ib; alpha subunit (45kD)	656	FALSE		-4.79031	-4.88394	-4.67508	-0.208862	0.182787	0.053144	3.43947	0.000710657	0.00899569	-5.59419	-5.75916	-5.42922	-0.329941	0.000203259
cg05798972	PPARBP	17	34.8606	5469	-	36.1	NCBI:RefSeq	AGTGCCCTAGTCGAGCATGAAATCTTCACAGAAGTTGAGAGTCCCCATCG	34861030	-	PBP; MED1; CRSP1; RB18A; TRIP2; CRSP200; DRIP205; DRIP230; PPARGBP; TRAP220; MGC71488;	NM_004774.2	GI:28559038	thyroid receptor interacting protein 2; PPARG binding protein; thyroid hormone receptor-associated protein complex component TRAP220; vitamin D receptor-interacting protein 230 kD; vitamin D receptor-interacting protein complex component DRIP205; go_component: nucleus; go_component: mediator complex; go_function: DNA binding; go_function: receptor activity; go_function: vitamin D receptor binding…	peroxisome proliferator-activated receptor binding protein	399	FALSE		-3.89001	-3.97213	-3.78894	-0.183186	0.200781	0.0457702	4.38672	1.86862e-05	0.000608927	-4.12422	-4.17563	-4.0728	-0.102827	0.0371424
cg14572111	SYT7	11	61.1055	9066	-	36.1	NCBI:RefSeq	CTTTTGGATCGGAGCCAAAGGGCACCTCGGAGGAGGTGGCCGGCTCTGCG	61104874	-	IPCA-7; PCANAP7; SYT-VII;	NM_004200.2	GI:38570145	synaptotagmin 7; prostate cancer associated protein 7; go_component: synapse; go_component: membrane; go_component: synaptic vesicle; go_component: integral to membrane; go_function: calcium ion binding; go_function: transporter activity; go_process: transport	synaptotagmin VII	603	TRUE	11:61104372-61105796	-4.69299	-4.79115	-4.57219	-0.218961	0.20829	0.0692585	3.00744	0.00297628	0.0241515	-5.34502	-5.46498	-5.22506	-0.239926	0.00412954
cg03168296	NOXA1	9	139.437	10811	+	36.1	NCBI:RefSeq	CGGAGAACAAAACAGAGGCTCAGGTTTTTAAAGAAAACAGAGCCCATCGG	139437668	+	p51NOX; FLJ25475; NY-CO-31; SDCCAG31;	NM_006647.1	GI:41393186	serologically defined colon cancer antigen 31; p67phox-like factor; Nox activator 1; go_function: binding	NADPH oxidase activator 1	836	TRUE	9:139436592-139438641	-4.98471	-5.08255	-4.86429	-0.218268	0.199303	0.0466245	4.27464	2.97426e-05	0.000882634	-4.43886	-4.54001	-4.33771	-0.202306	0.000445075
cg23428445	GPR37	7	124.193	2861	-	36.1	NCBI:RefSeq	CGCTGTCGAAAGGATGTAAATAGGCAGAGCAACTGTTACCAAGAAGGCCA	124192917	-	PAELR; EDNRBL; hET(B)R-LP;	NM_005302.2	GI:31377788	Parkin-associated endothelin receptor-like receptor; endothelin receptor type B-like; go_component: integral to plasma membrane; go_function: receptor activity; go_function: rhodopsin-like receptor activity; go_function: G-protein coupled receptor activity; unknown ligand; go_process: signal transduction; go_process: G-protein coupled receptor protein signaling pathway	G protein-coupled receptor 37	214	TRUE	7:124192612-124193608	-5.34515	-5.47252	-5.18837	-0.284149	0.231963	0.0877856	2.64238	0.0088908	0.0503731	-4.6131	-5.00576	-4.22044	-0.785322	0.027299
cg09416501	TOB2	22	40.1731	10766	-	36.1	NCBI:RefSeq	CGCCCCTGGGAGAACACCTCACACGACGCGCACAAGTTCAGAGTGGTATG	40172973	-	TOB4; TOBL; TROB2;	NM_016272.3	GI:56682970	go_component: nucleus; go_process: female gamete generation; go_process: negative regulation of cell proliferation; go_process: regulation of progression through cell cycle	transducer of ERBB2; 2	84	TRUE	22:40172095-40174791	-4.55123	-4.65022	-4.4294	-0.220815	0.243068	0.0561837	4.32631	2.40327e-05	0.000745412	-4.80581	-4.90098	-4.71064	-0.190333	0.00659836
cg04386405	ZNF83	19	57.8332	55769	-	36.1	NCBI:RefSeq	AGACGTCCCCATGAGAGTCCGGATATCGCTTCCTTTTGGGTTTAAAGTCG	57833450	-	HPF1; FLJ11015; FLJ14876;	NM_018300.2	GI:21361788	go_component: nucleus; go_component: nucleus; go_function: zinc ion binding; go_function: metal ion binding; go_function: nucleic acid binding; go_function: transcription factor activity; go_process: transcription; go_process: regulation of transcription; DNA-dependent	zinc finger protein 83 (HPF1)	244	TRUE	19:57832897-57834129	-5.58788	-5.69465	-5.45647	-0.238181	0.245783	0.0841378	2.92119	0.00389183	0.0291463	-4.76529	-4.96901	-4.56158	-0.407432	0.0180511
cg25399367	FBXO30	6	146.178	84085	-	36.1	NCBI:RefSeq	CCCCTCATTTTACAGTTGAGGAAACAGGCCCAAGTAGCATGACTTGTTCG	146177614	-	Fbx30; MGC21674;	NM_032145.4	GI:54112383	F-box only protein; helicase; 18; F-box domain protein; go_function: zinc ion binding; go_function: metal ion binding; go_process: ubiquitin cycle	F-box only protein 30	317	TRUE	6:146176958-146178525	-4.01149	-4.10394	-3.89771	-0.206234	0.209863	0.0462857	4.53407	1.00062e-05	0.000387364	-4.14603	-4.28614	-4.00592	-0.280226	1.48286e-06
cg23993660	PINK1	1	20.8324	65018	+	36.1	NCBI:RefSeq	CGTGGGTCCAAAGTGCAAAGGGAAAGTCACTGCTAGAGGCGCCAGTACCA	20832535	+	BRPK; PARK6;	NM_032409.1	GI:14165271	protein kinase BRPK; go_component: mitochondrion; go_function: ATP binding; go_function: nucleotide binding; go_function: transferase activity; go_function: magnesium ion binding; go_function: protein serine/threonine kinase activity; go_process: response to stress; go_process: protein kinase cascade; go_process: protein amino acid phosphorylation	PTEN induced putative kinase 1	122	TRUE	1:20832279-20833268	-5.13015	-5.18916	-5.05752	-0.131637	0.142724	0.043888	3.252	0.00134706	0.0140044	-4.7364	-4.85286	-4.61994	-0.232918	0.00177456
cg09038885	ADRA1B	5	159.276	147	+	36.1	NCBI:RefSeq	CGGGATATGCAACTTGTCCAGCACCTAAAAGAGGGAAAGAGAATTCTAGG	159276318	+	ADRA1; ALPHA1BAR;	NM_000679.3	GI:73747802	go_component: integral to plasma membrane; go_function: receptor activity; go_function: adrenoceptor activity; go_function: rhodopsin-like receptor activity; go_function: alpha1-adrenergic receptor activity; go_process: development; go_process: signal transduction; go_process: cell proliferation; go_process: cell-cell signaling; go_process: protein kinase cascade; go_process: G-protein coupled re…	alpha-1B-adrenergic receptor	592	TRUE	5:159275408-159276512	-5.08528	-5.21947	-4.92012	-0.299352	0.284399	0.0573477	4.9592	1.51871e-06	8.81066e-05	-4.21625	-4.47814	-3.95436	-0.523777	0.00245929
cg06958537	ETS2	21	39.0988	2114	+	36.1	NCBI:RefSeq	GGAGTCAGATAAACTCAGGTTTCCACCTTGAATTTCTCATCAATCTGACG	39099719	+		NM_005239.4	GI:56119171	v-ets avian erythroblastosis virus E26 oncogene homolog 2; oncogene ETS-2; v-ets avian erythroblastosis virus E2 oncogene homolog 2; go_component: nucleus; go_function: transcription factor activity; go_process: skeletal development; go_process: regulation of transcription; DNA-dependent	v-ets erythroblastosis virus E26 oncogene homolog 2	899	TRUE	21:39098731-39100684	-3.53753	-3.63969	-3.41179	-0.227901	0.212503	0.0618319	3.43678	0.000717331	0.00904681	-5.2538	-5.45502	-5.05257	-0.402444	1.20983e-05
cg00387170	FOXP4	6	41.622	116113	+	36.1	NCBI:RefSeq	TGCTTTAGGCGAATTATGGTAGCACTAGAAGTTGGTCTCCCCTCCCTCCG	41622142	+	hFKHLA; FLJ40908;	NM_001012426.1	GI:60498988	isoform 1 is encoded by transcript variant 1; winged-helix repressor FOXP4; fork head-related protein like A; go_component: nucleus; go_function: zinc ion binding; go_function: metal ion binding; go_function: nucleic acid binding; go_function: transcription factor activity; go_process: transcription; go_process: regulation of transcription; DNA-dependent	forkhead box P4 isoform 1	162	TRUE	6:41621573-41624345	-4.32776	-4.40455	-4.23325	-0.171305	0.201403	0.0662284	3.04104	0.00267661	0.0224358	-5.94666	-6.19024	-5.70308	-0.487159	1.61569e-06
cg19102858	COPS8	2	237.659	10920	+	36.1	NCBI:RefSeq	TTTTCCTTTCCTGAAACGTAGAGCAGATCTGGTTACTCTTCTGCACAACG	237658823	+	COP9; CSN8; SGN8; MGC1297; MGC43256;	NM_006710.4	GI:40805828	isoform 1 is encoded by transcript variant 1; go_component: signalosome complex; go_function: racemase and epimerase activity; acting on amino acids and derivatives; go_process: metabolism	COP9 signalosome subunit 8 isoform 1	183	TRUE	2:237658566-237659785	-4.89137	-5.0054	-4.75103	-0.25437	0.238793	0.0722305	3.30598	0.00112368	0.0122966	-5.4456	-5.60717	-5.28403	-0.323143	0.000517075
cg05923056	CHES1	14	88.953	1112	-	36.1	NCBI:RefSeq	CGCCCCCGCACCCCCGTGCCCCGCTCCGGCCAGGTGAGTTTGCACCCCGC	88953127	-	FOXN3; PRO1635; C14orf116;	NM_005197.2	GI:51093864	go_component: nucleus; go_function: protein binding; go_function: sequence-specific DNA binding; go_function: transcription factor activity; go_process: transcription; go_process: DNA damage checkpoint; go_process: G2 phase of mitotic cell cycle; go_process: regulation of transcription; DNA-dependent	checkpoint suppressor 1	128	TRUE	14:88952030-88954146	-5.5295	-5.7483	-5.26021	-0.488096	0.442042	0.132002	3.34875	0.000971715	0.011149	-7.59186	-7.87554	-7.30818	-0.567355	0.0211953
cg25906419	BACE2	21	41.4623	25825	+	36.1	NCBI:RefSeq	GGCCAGAGTCCCCCTGCAGGTTGTCTACCATGGCCAAGAAGTTGGCGGCG	41461598	+	ASP1; BAE2; DRAP; AEPLC; ALP56; ASP21; CDA13; CEAP1;	NM_012105.3	GI:21040358	isoform A preproprotein is encoded by transcript variant a; beta secretase 2; aspartyl protease 1; membrane-associated aspartic protease 1; memapsin-1; Down syndrome region aspartic protease; 56 kDa aspartic-like protease; beta-site amyloid beta A4 precursor protein-cleaving enzyme 2; transmembrane aspartic proteinase Asp1; go_component: membrane; go_component: integral to membrane; go_component:…	beta-site APP-cleaving enzyme 2 isoform A preproprotein	681	TRUE	21:41461112-41463202	-4.85797	-4.92689	-4.77314	-0.153756	0.173971	0.0633991	2.74406	0.00662608	0.0414155	-5.16866	-5.37162	-4.96571	-0.405914	0.000996503
cg10652277	SLC30A9	4	41.6871	10463	+	36.1	NCBI:RefSeq	CGCTTGGTTGGAAATCACGTAAACTGTTTACATCTTGTTCAGCCAGGAAA	41687280	+	HUEL; ZNT9; C4orf1;	NM_006345.3	GI:57164947	expressed in human embryonic lung; go_component: membrane; go_component: nucleus; go_component: cytoskeleton; go_function: cation transporter activity; go_function: transcription factor activity; go_process: cation transport	solute carrier family 30 (zinc transporter); member 9	161	TRUE	4:41686880-41687976	-5.10054	-5.37572	-4.76187	-0.613851	0.61634	0.119054	5.17699	5.51922e-07	3.81437e-05	-5.93939	-6.09607	-5.7827	-0.313364	0.00172347
cg09768944	PDCL	9	124.631	5082	-	36.1	NCBI:RefSeq	CGCAGCTGCTGCCGCTTCCCGGTGGACCCCAATGCAGTTACCTGCCCTAG	124630736	-	PhLP; DKFZp564M1863;	NM_005388.2	GI:9943841	phosducin-like protein; go_component: cellular component unknown; go_function: electron transporter activity; go_function: regulator of G-protein signaling activity; go_process: visual perception; go_process: electron transport; go_process: sensory perception; go_process: signal transduction	phosducin-like	206	TRUE	9:124630173-124632102	-5.09401	-5.15948	-5.01342	-0.146058	0.124411	0.0478215	2.60157	0.00998082	0.0544228	-3.98186	-4.12184	-3.84187	-0.279974	2.48181e-08
cg21529533	HLA-G	6	29.904	3135	+	36.1	NCBI:RefSeq	CGGAACACCAAGGCCCACGCACAGACTGACAGAATGAACCTGCAGACCCT	29903497	+	MHC-G;	NM_002127.3	GI:24797072	major histocompatibility complex; class I; G; MHC class I antigen; HLA class I molecule; go_component: membrane; go_component: integral to membrane; go_component: MHC class I protein complex; go_function: MHC class I receptor activity; go_function: MHC class I receptor activity; go_function: MHC class I receptor activity; go_process: antigen presentation; go_process: cellular defense response; go…	major histocompatibility complex; class I; G precursor	497	TRUE	6:29903354-29904626	-5.17939	-5.28217	-5.05289	-0.22928	0.250457	0.0584639	4.28396	2.86253e-05	0.000860639	-4.1743	-4.45138	-3.89721	-0.554175	0.00950204
cg09037858	POLR3D	8	22.159	661	+	36.1	NCBI:RefSeq	CGCCGGCCGCCGCCCGATGAGCCCCCGGGCCCCAGTCAGGAGAGGTCGGG	22158564	+	RPC4; BN51T; TSBN51;	NM_001722.2	GI:55769551	BN51 (BHK21) temperature sensitivity complementing; temperature sensitive complementation; cell cycle specific; tsBN51; go_component: nucleus; go_function: DNA binding; go_function: transferase activity; go_function: DNA-directed RNA polymerase activity; go_process: transcription; go_process: tRNA metabolism; go_process: regulation of progression through cell cycle	RNA polymerase III 53 kDa subunit RPC4	438	TRUE	8:22157862-22159202	-4.41787	-4.47924	-4.34234	-0.136903	0.147035	0.0545332	2.69624	0.00761651	0.0454278	-3.86444	-3.99168	-3.73721	-0.254467	5.81077e-06
cg07880061	PX19	5	176.663	27166	+	36.1	NCBI:RefSeq	CGGTCGTGCACGTAGCGCTCCACCAGGCTAGTCTTGCCCACGTACTCCTT	176663441	+	PRELI; CGI-106; MGC87972;	NM_013237.2	GI:31543450	go_process: development; go_process: immune response	px19-like protein	637	TRUE	5:176662469-176663894	-5.91703	-6.17971	-5.59373	-0.585984	0.604305	0.187323	3.226	0.00146883	0.0149904	-7.21691	-7.48392	-6.94989	-0.534034	0.0463003
cg27649764	CTDSPL2	15	42.5063	51496	+	36.1	NCBI:RefSeq	ACTGATACATTTTCACTCTGTGGAGCTGACCGTCCTTTGACCTAGGGTCG	42507119	+	HSPC058; HSPC129; FLJ10523;	NM_016396.1	GI:7705460	synonyms: HSPC058; HSPC129; FLJ10523	CTD (carboxy-terminal domain; RNA polymerase II; polypeptide A) small phosphatase like 2	797	TRUE	15:42505663-42507603	-5.96317	-6.08847	-5.80896	-0.279517	0.290373	0.0866277	3.35197	0.000961109	0.0110705	-8.91293	-9.24346	-8.5824	-0.661067	0.0491951
cg26128092	WDR8	1	3.55741	49856	-	36.1	NCBI:RefSeq	GGCCAGGCGGGGATGTCAGGGTCTGCGCGATCTGGGGGGCCCTAGAGGCG	3556497	-	FLJ20430; MGC99569;	NM_017818.2	GI:16445433	WD repeat-containing protein 8	WD repeat domain 8 protein	913	TRUE	1:3556965-3559547	-4.98898	-5.09717	-4.85581	-0.241359	0.20416	0.0744815	2.74108	0.00668418	0.0416901	-3.12482	-3.57824	-2.67139	-0.906844	0.000803484
cg15423613	KCTD7	7	65.7308	154881	+	36.1	NCBI:RefSeq	CGAGAAAACCCAAAATAGGAGCGCTTGAGTTCAATGAATAATGACAGTGA	65731380	+	FLJ32069;	NM_153033.1	GI:23308550	go_component: membrane; go_component: voltage-gated potassium channel complex; go_function: protein binding; go_function: voltage-gated potassium channel activity; go_process: potassium ion transport	potassium channel tetramerisation domain containing 7	596	TRUE	7:65730329-65731881	-5.48809	-5.63666	-5.30523	-0.331432	0.339931	0.121128	2.80637	0.00551072	0.0367768	-6.89906	-7.03207	-6.76604	-0.266037	0.00319631
cg13766096	ING1	13	110.163	3621	+	36.1	NCBI:RefSeq	CGGGGAGACCGTGAGTAATGCCCCCCGGACTCTTACTACTAGAAACCCAA	110163084	+	p33; p47; p33ING1; p24ING1c; p33ING1b; p47ING1a;	NM_005537.3	GI:38201660	isoform D is encoded by transcript variant 4; inhibitor of growth 1; tumor suppressor ING1; growth inhibitor ING1; growth inhibitory protein ING1; go_component: nucleus; go_function: protein binding; go_function: zinc ion binding; go_function: metal ion binding; go_process: cell cycle; go_process: negative regulation of cell growth; go_process: regulation of transcription; DNA-dependent; go_proce…	inhibitor of growth family; member 1 isoform D	409	TRUE	13:110162391-110166883	-4.18694	-4.26126	-4.09546	-0.165797	0.207909	0.0701087	2.96552	0.0033932	0.0264608	-4.49073	-4.55593	-4.42552	-0.130412	0.00845109
cg08258650	SLC1A2	11	35.3985	6506	-	36.1	NCBI:RefSeq	CGAGACCTGTGCAGCTTTGATTATCTCTGGAATACTGCAGGAACCTAGGG	35397372	-	EAAT2; GLT-1;	NM_004171.2	GI:40254477	glutamate/aspartate transporter II; excitatory amino acid transporter 2; glial high affinity glutamate transporter; H.sapiens mRNA for glutamate transporter; dJ68D18.1.2 (solute carrier family 1 (glial high affinity glutamate transporter) member 2); dJ68D18.1.1 (solute carrier family 1 (glial high affinity glutamate transporter) member 2); go_component: membrane; go_component: integral to membran…	solute carrier family 1; member 2	1104	TRUE	11:35396372-35398905	-5.02524	-5.08381	-4.95315	-0.130657	0.155035	0.0562312	2.75709	0.00637717	0.040362	-5.56552	-5.71204	-5.419	-0.293043	0.0116717
cg21682382	TMEM39B	1	32.3106	55116	+	36.1	NCBI:RefSeq	CGGTGAGTAACGTCAAATGTGAGAAATATTTAGGACTTAGGCTCACAAAG	32311116	+	FLJ10315; RP11-277A4.3;	NM_018056.1	GI:8922347	synonyms: FLJ10315; RP11-277A4.3	transmembrane protein 39B	477	TRUE	1:32310605-32311715	-4.99965	-5.05992	-4.92546	-0.134468	0.138254	0.0524478	2.63602	0.00905331	0.0509434	-3.74734	-4.08899	-3.40569	-0.683298	1.5954e-11
cg22082243	C10orf84	10	120.092	63877	-	36.1	NCBI:RefSeq	GCGACCACTTCCTGACAGGTGAGTACGGCTTATGGAGGGTTGGTTACCCG	120091808	-	FLJ13188; bA319I23.1; RP11-319I23.1;	NM_022063.1	GI:11545770	synonyms: FLJ13188; bA319I23.1; RP11-319I23.1	hypothetical protein LOC63877	68	TRUE	10:120091284-120092010	-5.26018	-5.36283	-5.13386	-0.228971	0.23766	0.0843245	2.8184	0.00531619	0.0358974	-5.39385	-5.46274	-5.32496	-0.137779	0.020562
cg01438829	TMEM97	17	23.6708	27346	+	36.1	NCBI:RefSeq	ACGCTTTGTTTCCTTTAAAGTCACTTCTTCCCTGGGTTTAAGGTTTCCCG	23670608	+	MAC30;	NM_014573.1	GI:32698695	go_component: cellular component unknown; go_function: molecular function unknown; go_process: regulation of cell growth	hypothetical protein MAC30	170	TRUE	17:23669254-23670883	-5.20007	-5.26853	-5.11581	-0.152713	0.150342	0.0437577	3.43579	0.00071982	0.00906709	-5.49273	-5.54965	-5.43581	-0.113839	0.0336494
cg09076012	NOV	8	120.498	4856	+	36.1	NCBI:RefSeq	CGGGCAAAGTAACTTGGGGGCATCTTAAGGGTGTGCCACTTACCTGTCCC	120497882	+	CCN3; NOVH; IGFBP9;	NM_002514.2	GI:19923725	go_component: extracellular region; go_function: growth factor activity; go_function: insulin-like growth factor binding; go_process: regulation of cell growth	nov precursor	197	TRUE	8:120497502-120498445	-3.69043	-3.77992	-3.58028	-0.199642	0.176573	0.0559703	3.15476	0.00185672	0.0175168	-3.93183	-4.01653	-3.84714	-0.169394	0.000235311
cg22392666	FXYD7	19	40.326	53822	+	36.1	NCBI:RefSeq	GCTGGATGCTTTGGCGGCGAAGGCGCGCTGCAGCAGCTGGAAGCAGGACG	40325994	+	FLJ25096;	NM_022006.1	GI:11612658	go_component: membrane; go_component: integral to membrane; go_function: ion channel activity; go_process: ion transport	FXYD domain-containing ion transport regulator 7	13	TRUE	19:40325581-40326121	-4.86218	-4.94995	-4.75416	-0.195792	0.228965	0.0818978	2.79574	0.00568808	0.0374987	-3.75298	-4.08308	-3.42288	-0.660197	0.0184737
cg16408394	RXRA	9	136.359	6256	+	36.1	NCBI:RefSeq	CGTCAGACCTGGGAAGGCCCCATTCCAGAAATGGGGCCCCTCACTCTGGC	136358231	+	NR2B1;	NM_002957.3	GI:21536318	go_component: nucleus; go_function: steroid binding; go_function: zinc ion binding; go_function: metal ion binding; go_function: protein binding; go_function: protein binding; go_function: retinoid-X receptor activity; go_function: steroid hormone receptor activity; go_function: transcription factor activity; go_function: transcription coactivator activity; go_process: transcription; go_process: …	retinoid X receptor; alpha	665	TRUE	9:136356745-136358929	-5.06228	-5.14252	-4.96351	-0.179014	0.188491	0.0703921	2.67773	0.00803461	0.0470628	-5.0679	-5.27999	-4.85581	-0.424177	2.25637e-07
cg08222185	ADARB1	21	45.3193	104	+	36.1	NCBI:RefSeq	CGGCCCGCAGCTCCGGCCCCACCACCAGTCCCTGCCCGGCGCTTACATAA	45318943	+	RED1; ADAR2; ADAR2d; ADAR2g; DRABA2; DRADA2; ADAR2a-L1; ADAR2a-L2; ADAR2a-L3;	NM_001112.2	GI:75709167	isoform 1 is encoded by transcript variant 1; RNA editase; human dsRNA adenosine deaminase DRADA2b; RNA editing deaminase 1; adenosine deaminase acting on RNA type2g; adenosine deaminase acting on RNA type2a; adenosine deaminase acting on RNA type2d; adenosine deaminase; RNA-specific; B1 (homolog of rat RED1); go_component: nucleus; go_component: intracellular; go_function: zinc ion binding; go_f…	RNA-specific adenosine deaminase B1 isoform 1	308	TRUE	21:45317770-45320123	-4.68179	-4.76863	-4.57491	-0.193718	0.234067	0.0870532	2.68878	0.0077827	0.0460853	-4.42941	-4.60383	-4.25499	-0.348845	1.54791e-06
cg22831514	DHRS8	4	88.5317	51170	-	36.1	NCBI:RefSeq	AAGGTTGCTTATCACTAGATAGGGGGTGCCGCTGGGCGCGGCGGCTCTCG	88531352	-	PAN1B; RETSDR2;	NM_016245.2	GI:56786142	17-beta-hydroxysteroid dehydrogenase type XI; 17-BETA-HSD11; 17-BETA-HSDXI; retinal short-chain dehydrogenase/reductase 2; go_function: oxidoreductase activity; go_process: metabolism; go_process: steroid biosynthesis	dehydrogenase/reductase (SDR family) member 8	378	TRUE	4:88531284-88532011	-4.40122	-4.48833	-4.29402	-0.194307	0.216771	0.0810269	2.6753	0.00809109	0.0472592	-4.03409	-4.16403	-3.90415	-0.25988	3.6313e-05
cg11566939	DULLARD	17	7.09596	23399	-	36.1	NCBI:RefSeq	CGGGGCTGCAGCCTCTGCAGCTGGGTTTCCCACTCTGACAGGCGCCATTT	7095983	-	HSA011916;	NM_015343.3	GI:34222318	go_function: phosphoric monoester hydrolase activity	dullard homolog	28	TRUE	17:7095023-7096957	-3.93743	-4.00068	-3.85959	-0.141084	0.135743	0.0387574	3.50238	0.0005699	0.00768637	-3.84392	-3.93606	-3.75178	-0.184283	1.98037e-05
cg23362667	RIPK5	1	203.448	25778	-	36.1	NCBI:RefSeq	CGCTCATAGAGGGATTAGGAACACTTTTTAAAATGAAGAGAGCGCGAAAA	203447313	-	RIP5; DustyPK; HDCMD38P; KIAA0472;	NM_015375.1	GI:40806178	isoform 1 is encoded by transcript variant 1; receptor interacting protein 5; dusty protein kinase; go_function: ATP binding; go_function: receptor activity; go_function: nucleotide binding; go_function: protein kinase activity; go_function: protein-tyrosine kinase activity; go_function: protein serine/threonine kinase activity; go_process: protein amino acid phosphorylation	receptor interacting protein kinase 5 isoform 1	387	TRUE	1:203446453-203447711	-3.22815	-3.28656	-3.15626	-0.130298	0.153132	0.0505038	3.0321	0.00275353	0.022885	-2.86102	-3.03814	-2.68391	-0.354224	0.000175343
cg16807911	CDK4	12	56.4322	1019	-	36.1	NCBI:RefSeq	CTGGCGTGAGGTAAGTGCAGTCCCTTCCCAGGAATGAGAACCAGTGCCCG	56432431	-	CMM3; PSK-J3; MGC14458;	NM_000075.2	GI:16936531	cell division kinase 4; melanoma cutaneous malignant; 3; go_function: ATP binding; go_function: nucleotide binding; go_function: protein binding; go_function: protein binding; go_function: protein binding; go_function: protein binding; go_function: protein binding; go_function: protein binding; go_function: transferase activity; go_function: protein kinase activity; go_function: cyclin-dependent …	cyclin-dependent kinase 4	246	TRUE	12:56431837-56432741	-2.89897	-2.9533	-2.8321	-0.121207	0.145965	0.0476381	3.06404	0.00248782	0.0212688	-3.31584	-3.38461	-3.24708	-0.137525	0.0111143
cg20295671	YPEL1	22	20.4205	29799	-	36.1	NCBI:RefSeq	CGAGTGACCACCACCGCCAGCCCCGCCGGCCGAGTGTCCCTGCCCAGCCA	20420071	-	FKSG3; MGC64992;	NM_013313.3	GI:40549458	DiGeorge syndrome-related protein; yippee (Drosophila) homolog-like 1; go_component: nucleus	yippee-like 1	415	TRUE	22:20419518-20420996	-6.21144	-6.33483	-6.05958	-0.275242	0.294176	0.0750568	3.91938	0.00012225	0.00250521	-5.97927	-6.49607	-5.46247	-1.0336	0.000321127
cg23352579	RDX	11	109.672	5962	-	36.1	NCBI:RefSeq	CGCTGAATATCTGGATTTTCAAACAACCCTTGGGACCATGCCAGCCCGGG	109672647	-		NM_002906.3	GI:62244047	go_component: cytoplasm; go_component: plasma membrane; go_component: actin cytoskeleton; go_function: binding; go_function: actin binding; go_function: structural molecule activity; go_process: cytoskeletal anchoring; go_process: barbed-end actin filament capping	radixin	684	TRUE	11:109671590-109673132	-5.25042	-5.31391	-5.17228	-0.141634	0.153818	0.0549374	2.79988	0.00561842	0.0372182	-6.42709	-6.5027	-6.35148	-0.151222	0.0395473
cg23538854	IL7	8	79.8802	3574	-	36.1	NCBI:RefSeq	CTGAATCAAAGCAATTCTGGGTAAAAGACTTCCCAGATGATCTCTCAACG	79880313	-	IL-7;	NM_000880.2	GI:28610152	go_component: extracellular space; go_function: protein binding; go_function: interleukin-7 receptor binding; go_process: bone resorption; go_process: cell-cell signaling; go_process: organ morphogenesis; go_process: humoral immune response; go_process: negative regulation of apoptosis; go_process: positive regulation of B cell proliferation; go_process: positive regulation of T cell differentiat…	interleukin 7 precursor	131	TRUE	8:79879041-79880408	-4.61498	-4.70675	-4.50203	-0.204718	0.169848	0.0644451	2.63555	0.00906536	0.0509416	-5.13384	-5.23813	-5.02956	-0.208567	0.0235474
cg20166532	EDG1	1	101.475	1901	+	36.1	NCBI:RefSeq	ATCTGATCGAGATGGGCTCCTTAGTAGCCCAGAGATGCAAATTTTCAGCG	101475164	+	ECGF1; EDG-1; S1PR1; CHEDG1; D1S3362;	NM_001400.2	GI:13027635	sphingosine 1-phosphate receptor EDG1; G protein-coupled sphingolipid receptor; go_component: plasma membrane; go_component: integral to plasma membrane; go_function: receptor activity; go_function: lysosphingolipid and lysophosphatidic acid receptor activity; go_process: cell adhesion; go_process: cell adhesion; go_process: signal transduction; go_process: G-protein coupled receptor protein sign…	endothelial differentiation; sphingolipid G-protein-coupled receptor; 1	206	TRUE	1:101474307-101475454	-5.14905	-5.20819	-5.07626	-0.131928	0.154051	0.057298	2.6886	0.00778666	0.0460955	-5.08874	-5.22351	-4.95398	-0.269526	0.00223628
cg17867194	SLC30A6	2	32.2442	55676	+	36.1	NCBI:RefSeq	CATTTTCATAAGGTTAAATCATACAACACAGGTAAAAGCGCTTCAGCACG	32244437	+	ZNT6; FLJ31101; MGC45055;	NM_017964.2	GI:21687223	go_component: membrane; go_function: cation transporter activity; go_process: cation transport	solute carrier family 30 (zinc transporter); member 6	260	TRUE	2:32243703-32244778	-4.55296	-4.613	-4.47908	-0.133919	0.17488	0.0494175	3.53883	0.000500784	0.00695927	-4.87626	-4.99832	-4.75419	-0.244124	0.000128472
cg11434468	XKR6	8	11.0967	286046	-	36.1	NCBI:RefSeq	CGTCTGGCACTGCCCCCTCCAGGGATCACTTTGGACCGCCTCACTCGGGC	11096285	-	XRG6; C8orf7; C8orf21;	NM_173683.2	GI:34222239	isoform b is encoded by transcript variant 2; XK-related protein 6; X Kell blood group precursor-related family; member 6; go_component: membrane; go_component: integral to membrane	XK-related protein 6 isoform b	402	TRUE	8:11094813-11096786	-5.55179	-5.63241	-5.45257	-0.179844	0.217644	0.075662	2.87653	0.00446122	0.0318581	-6.94882	-7.02343	-6.87421	-0.149228	0.0176371
cg23724447	BUB3	10	124.904	9184	+	36.1	NCBI:RefSeq	TGGCGTTTGAAATCAGCCAATGGCAGGTCTACACTGGAGCTTCCTCTCCG	124903860	+	BUB3L; hBUB3;	NM_001007793.1	GI:56550080	isoform b is encoded by transcript variant 2; mitotic checkpoint component; budding uninhibited by benomyl; BUB3 (budding uninhibited by benzimidazoles 3; yeast) homolog; go_component: nucleus; go_component: kinetochore; go_process: mitosis; go_process: cell proliferation; go_process: mitotic spindle checkpoint	BUB3 budding uninhibited by benzimidazoles 3 isoform b	27	TRUE	10:124903424-124904818	-3.48908	-3.58131	-3.37558	-0.205728	0.216909	0.080017	2.71079	0.0073019	0.0442432	-3.59242	-3.77145	-3.4134	-0.358049	8.68156e-07
cg20959866	AJAP1	1	4.61387	55966	+	36.1	NCBI:RefSeq	CGGTCCCTCATCGCCCAGCGCAGCTGCTGCCTGGCCAGGCCCTTGCTCCG	4614965	+	MOT8; SHREW1; SHREW-1; RP3-426F10.1;	NM_018836.2	GI:33942062	go_component: integral to membrane	transmembrane protein SHREW1	1097	TRUE	1:4613727-4616670	-4.43689	-4.51044	-4.34636	-0.164079	0.165582	0.0579088	2.85935	0.00469984	0.0329453	-2.30523	-2.57665	-2.03381	-0.542837	0.0220107
cg06492206	SLC19A2	1	167.722	10560	-	36.1	NCBI:RefSeq	CGCCTCTAGGGTCGCTGCCTGATCGCCCAGTTTAAGGGAGACCCGTCCTA	167721865	-	TC1; THT1; TRMA; THTR1;	NM_006996.1	GI:27734718	solute carrier; reduced folate carrier protein (RFC) like; thiamine transporter 1; thiamine carrier 1; high affinity thiamine transporter; thiamine transporter THTR-1; go_component: membrane; go_component: integral to membrane; go_function: folic acid binding; go_function: reduced folate carrier activity; go_function: thiamin transporter activity; go_function: folic acid transporter activity; go_…	solute carrier family 19; member 2	65	TRUE	1:167721011-167722320	-5.33737	-5.5083	-5.12698	-0.381323	0.383982	0.105652	3.63441	0.000355076	0.00546955	-5.74613	-5.88212	-5.61014	-0.271978	9.58388e-05
cg03788666	MFAP1	15	41.9041	4236	-	36.1	NCBI:RefSeq	ACGGTGATTCCCGAAACTTGACTAATTCCAAACAGTGAACACCAGCAACG	41904243	-		NM_005926.2	GI:50726967		microfibrillar-associated protein 1	122	TRUE	15:41903778-41904458	-4.40501	-4.50904	-4.27698	-0.232058	0.223445	0.0764636	2.92224	0.00387934	0.0290739	-5.5129	-5.64044	-5.38536	-0.255083	0.00137446
cg04947578	C19orf10	19	4.62093	56005	-	36.1	NCBI:RefSeq	GCAGGGGTGCCTGGACACTCCAGGCAGGCGACAGGTGACAGGTGATCACG	4621415	-	IL25; IL27; SF20; IL27w; R33729_1; EUROIMAGE1875335;	NM_019107.3	GI:54112408	interleukin 25; interleukin 27 working designation; stromal cell-derived growth factor	chromosome 19 open reading frame 10	487	TRUE	19:4620866-4621800	-4.87481	-4.94634	-4.78678	-0.159561	0.132608	0.0455675	2.91014	0.00402621	0.029838	-5.1113	-5.20696	-5.01564	-0.191324	0.00719129
cg10089145	ST14	11	129.535	6768	+	36.1	NCBI:RefSeq	GTGGCCGAGCTCTGGGCGCACAGGTGGAATTTCCTGTTCAGCGGGTGCCG	129534933	+	HAI; MTSP1; SNC19; MT-SP1; MTSP-1; PRSS14; TADG-15;	NM_021978.2	GI:21264629	suppression of tumorigenicity 14 (colon carcinoma); membrane-type serine protease; serine protease TADG-15; tumor associated differentially expressed gene 15 protein; go_component: plasma membrane; go_component: plasma membrane; go_component: integral to plasma membrane; go_function: serine-type endopeptidase activity; go_process: proteolysis	matriptase	380	TRUE	11:129534409-129535552	-5.06555	-5.16665	-4.94111	-0.22554	0.243139	0.0703056	3.45831	0.000665404	0.00860804	-4.62958	-4.69859	-4.56057	-0.13802	0.0012566
cg08339208	SIKE	1	115.125	80143	-	36.1	NCBI:RefSeq	CGTGCCCGGAAATGACGCCTGTAATGCTGAGACAGACTCCCAGAAGATCT	115124821	-	FLJ21168; DKFZp686A0768; RP5-1000E10.4;	NM_025073.1	GI:13376618	synonyms: FLJ21168; DKFZp686A0768; RP5-1000E10.4	suppressor of IKK epsilon	29	TRUE	1:115124423-115125453	-6.04206	-6.129	-5.93506	-0.193932	0.218027	0.0719279	3.03118	0.00276154	0.0229423	-6.77249	-6.87698	-6.66799	-0.208987	0.0101536
cg03750407	RAD9A	11	66.9163	5883	+	36.1	NCBI:RefSeq	GGGGCGGGTGGGACTCCAGCCGGGAGCGGGTAACCCGGACTAGAGTCTCG	66915999	+	RAD9;	NM_004584.2	GI:19924112	RAD9 homolog (S. pombe); RAD9 (S. pombe) homolog; cell cycle checkpoint control protein; go_component: nucleus; go_process: DNA repair; go_process: DNA damage checkpoint; go_process: DNA replication checkpoint; go_process: regulation of progression through cell cycle	RAD9 homolog	347	TRUE	11:66915580-66916638	-4.34085	-4.4751	-4.17561	-0.299498	0.291067	0.0886538	3.28318	0.00121344	0.0130093	-4.95693	-5.05934	-4.85453	-0.204812	0.00489696
cg08724563	RAX	18	55.0917	30062	-	36.1	NCBI:RefSeq	CCCAGGGGTGGCCACTAGAGGACCCTGTGGCTGGGCCGGGTGAGGACACG	55091605	-	RX;	NM_013435.1	GI:7305450	retinal homeobox protein; go_component: nucleus; go_function: transcription factor activity; go_function: RNA polymerase II transcription factor activity; go_process: development; go_process: visual perception; go_process: regulation of transcription; DNA-dependent	retina and anterior neural fold homeobox	130	TRUE	18:55090435-55093173	-4.9626	-5.10243	-4.79049	-0.31194	0.298413	0.101125	2.95095	0.00355022	0.0272722	-5.40152	-5.49075	-5.31229	-0.178456	0.00888806
cg23845507	CDC7	1	91.7393	8317	+	36.1	NCBI:RefSeq	CCCGAGGGAAGCCGGTCCTTCCCGGCTGAGCTCGCGGCCAGCGCTGGCCG	91739032	+	Hsk1; CDC7L1; HsCDC7; huCDC7; MGC117361; MGC126237; MGC126238;	NM_003503.2	GI:11038647	Cell division cycle 7; S. Cerevisiae; homolog-like 1; CDC7 cell division cycle 7-like 1 (S. cerevisiae); CDC7 (cell division cycle 7; S. cerevisiae; homolog)-like 1; go_component: nucleus; go_component: cytoplasm; go_function: ATP binding; go_function: nucleotide binding; go_function: protein binding; go_function: transferase activity; go_function: protein kinase activity; go_function: protein-ty…	CDC7 cell division cycle 7	287	TRUE	1:91738697-91739771	-5.63493	-5.70898	-5.54379	-0.165187	0.186901	0.0678045	2.75647	0.00638881	0.0404108	-5.03055	-5.13592	-4.92518	-0.210738	0.000297279
cg06689536	CCNF	16	2.42009	899	+	36.1	NCBI:RefSeq	CGTTTGGCTTTTGCAGCTGATTTAATTGCTAACAGGAAGACCCCGGTCAA	2419441	+	FBX1; FBXO1;	NM_001761.1	GI:4502620	F-box only protein 1; go_component: nucleus; go_process: mitosis; go_process: cell division; go_process: regulation of progression through cell cycle	cyclin F	654	TRUE	16:2418535-2420118	-5.32777	-5.43375	-5.19734	-0.2364	0.219395	0.0620623	3.53508	0.000507512	0.0070102	-5.67428	-5.73204	-5.61653	-0.115512	0.0392737
cg09938681	ZNF688	16	30.4904	146542	-	36.1	NCBI:RefSeq	CGCCGAGGCCCGGGGAGACCCGGCCTGGTTGCAGGAAGCCCGGGACTGTG	30491229	-		NM_145271.3	GI:67003556	isoform a is encoded by transcript variant 1; go_component: nucleus; go_function: zinc ion binding; go_function: nucleic acid binding; go_process: regulation of transcription; DNA-dependent	zinc finger protein 688 isoform a	807	TRUE	16:30490076-30491410	-5.46	-5.59562	-5.29307	-0.302555	0.248099	0.0893021	2.7782	0.00599189	0.0388671	-5.88779	-6.0019	-5.77368	-0.228222	0.00310868
cg22603964	MAN2A1	5	109.053	4124	+	36.1	NCBI:RefSeq	CGCCCCCGAAGGCCTCAACTCCCAGAAAGCTGCCTGCCAGGTCACAAGAG	109053055	+	MANA2; MANII;	NM_002372.2	GI:51477713	mannosidase; alpha type II; Golgi alpha-mannosidase II; mannosyl-oligosaccharide 1;3-1;6-alpha-mannosidase; go_component: Golgi stack; go_component: membrane fraction; go_component: integral to membrane; go_function: alpha-mannosidase activity; go_function: hydrolase activity; acting on glycosyl bonds; go_function: mannosyl-oligosaccharide 1;3-1;6-alpha-mannosidase activity; go_process: mannose m…	mannosidase; alpha; class 2A; member 1	259	TRUE	5:109052712-109054869	-5.31626	-5.38745	-5.22865	-0.158793	0.194736	0.0735822	2.64651	0.0087867	0.0499068	-7.42878	-7.53993	-7.31764	-0.222287	0.026902
cg04680304	RRM1	11	4.07276	6240	+	36.1	NCBI:RefSeq	TGGCTGAGGCTCTGAAGGATCCAAGACTGGACTGCGGCTCTAAAGCGCCG	4072587	+	R1; RR1; RIR1;	NM_001033.2	GI:21071083	ribonucleotide reductase; large subunit; ribonucleotide reductase; R1 subunit; go_component: ribonucleoside-diphosphate reductase complex; go_function: ATP binding; go_function: nucleotide binding; go_function: oxidoreductase activity; go_function: ribonucleoside-diphosphate reductase activity; go_process: DNA replication	ribonucleoside-diphosphate reductase M1 chain	173	TRUE	11:4072046-4073405	-5.2225	-5.30889	-5.11618	-0.192712	0.203001	0.074505	2.72466	0.00701297	0.0431527	-4.65347	-4.73681	-4.57014	-0.166672	0.0423731
cg18579327	CREB1	2	208.104	1385	+	36.1	NCBI:RefSeq	TTCTCTCCACTCTTTGTGCAATAAAGTTCGAAACCCAAGGTTTCCTCTCG	208102931	+	CREB; MGC9284;	NM_004379.2	GI:22219459	isoform A is encoded by transcript variant A; cAMP-response element-binding protein-1; active transcription factor CREB; transactivator protein; go_component: nucleus; go_component: nucleus; go_function: DNA binding; go_function: protein binding; go_function: protein binding; go_function: transcription factor activity; go_function: transcription cofactor activity; go_process: signal transduction;…	cAMP responsive element binding protein 1 isoform A	871	TRUE	2:208101784-208103915	-5.1374	-5.19828	-5.06248	-0.135803	0.144045	0.0445578	3.23276	0.0014362	0.0147598	-5.38723	-5.46695	-5.30751	-0.159441	5.00522e-05
cg18692596	LOC58486	11	10.8364	58486	-	36.1	NCBI:RefSeq	CGGGGCTAGTGAAGTTTGAGAACAATTGCTTCCTACCCAGCCGCTCCGCT	10836190	-		NM_021211.2	GI:49574209	go_function: DNA binding	hypothetical protein LOC58486	247	TRUE	11:10835571-10837185	-4.46993	-4.56585	-4.35189	-0.213962	0.195794	0.0584405	3.35031	0.000966552	0.0111083	-4.26069	-4.37622	-4.14516	-0.231054	5.45194e-05
cg21718857	DLL3	19	44.6814	10683	+	36.1	NCBI:RefSeq	GAGCCCGGACATCCGTGGGGAGACCATGGCCTTCTGGTGGGGGGGTCTCG	44681427	+	SCDO1;	NM_016941.2	GI:45243550	isoform 1 precursor is encoded by transcript variant 1; delta (Drosophila)-like 3; go_component: membrane; go_component: integral to membrane; go_function: Notch binding; go_process: cell differentiation; go_process: skeletal development; go_process: Notch signaling pathway; go_process: cell fate determination; go_process: nervous system development; go_process: embryonic development (sensu Mamma…	delta-like 3 protein isoform 1 precursor	5	TRUE	19:44680370-44682060	-4.01849	-4.08398	-3.93789	-0.146088	0.168072	0.0502266	3.34627	0.000979977	0.011225	-4.47348	-4.55497	-4.39199	-0.162971	0.0130696
cg20451718	C21orf67	21	45.1848	84536	-	36.1	NCBI:RefSeq	TCCTTTCCTTTCCGGGGAGCTCAGTGCGATTCAGGAACCTCTGGGGTCCG	45184188	-	PRED54;	NM_058188.1	GI:17158018	synonym: PRED54	chromosome 21 open reading frame 67	612	TRUE	21:45183504-45184998	-4.36672	-4.48143	-4.22554	-0.255882	0.249991	0.0713722	3.50264	0.00056937	0.00768929	-5.00538	-5.07018	-4.94057	-0.129609	0.0403777
cg16920242	TEP1	14	19.9514	7011	-	36.1	NCBI:RefSeq	CGGGAATCGGACGCCCCAGGTCAGGCACCCAGGGTTTCCAGCCCCAGTCT	19951420	-	TP1; TLP1; p240; TROVE1; VAULT2;	NM_007110.3	GI:21536370	TROVE domain family; member 1; telomerase protein component 1; go_component: cytoplasm; go_component: soluble fraction; go_component: nuclear matrix; go_component: chromosome; telomeric region; go_component: telomerase holoenzyme complex; go_function: ATP binding; go_function: RNA binding; go_function: nucleotide binding; go_function: telomerase activity; go_process: telomerase-independent telome…	telomerase-associated protein 1	1	TRUE	14:19951317-19951775	-3.17689	-3.27967	-3.05039	-0.22928	0.205202	0.0479555	4.27902	2.92129e-05	0.000871943	-3.31712	-3.42154	-3.2127	-0.208836	0.000459667
cg14607813	SRP9	1	224.032	6726	+	36.1	NCBI:RefSeq	CGGGGCCGCTGCTTTGGGCCCCAGCCCAGGATGTCTTCCCGCCATCCACT	224032162	+	ALURBP;	NM_003133.1	GI:4507216	bA251A15.3 (signal recognition particle 9kD); go_component: signal recognition particle (sensu Eukaryota); go_component: signal recognition particle receptor complex; go_function: RNA binding; go_function: RNA binding; go_function: signal recognition particle binding; go_process: protein targeting; go_process: negative regulation of translational elongation	signal recognition particle 9kDa	188	TRUE	1:224031442-224032456	-4.55089	-4.68845	-4.38159	-0.306856	0.285302	0.0861615	3.31124	0.00110385	0.0121832	-4.61448	-4.68154	-4.54743	-0.1341	0.0255513
cg04677227	LOXL4	10	100.018	84171	-	36.1	NCBI:RefSeq	GGAGTCCCTCTCCCAGGCAGTTTCCTCTTTTGCAGAACAAGGTAATGACG	100017997	-	LOXC; FLJ21889;	NM_032211.6	GI:67782348	lysyl oxidase related C; lysyl oxidase homolog 4; go_component: membrane; go_function: metal ion binding; go_function: copper ion binding; go_function: oxidoreductase activity; go_function: scavenger receptor activity; go_function: protein-lysine 6-oxidase activity	lysyl oxidase-like 4 precursor	313	TRUE	10:100017737-100018613	-5.25276	-5.40569	-5.06454	-0.341143	0.344454	0.0898461	3.83382	0.000169459	0.00319014	-5.73174	-5.79448	-5.669	-0.125479	0.0348632
cg18702197	HOXD3	2	176.736	3232	+	36.1	NCBI:RefSeq	GGGCTCTCAAGCCAGCTGGTCCTGTAGCTGCTTTATATAATACATTCACG	176737051	+	HOX4; HOX1D; HOX4A; Hox-4.1; MGC10470;	NM_006898.4	GI:23510372	homeobox protein Hox-D3; Hox-4.1; mouse; homolog of; homeo box D3; go_component: nucleus; go_function: transcription factor activity; go_process: morphogenesis; go_process: regulation of transcription; DNA-dependent	homeobox D3	1164	TRUE	2:176735581-176736379	-4.73728	-4.82459	-4.62983	-0.194756	0.180531	0.0472378	3.82175	0.000177364	0.00329083	-2.45472	-2.67547	-2.23396	-0.441515	0.00789838
cg00201234	FBLN2	3	13.566	2199	+	36.1	NCBI:RefSeq	TGTACAGATGCGGGCACAGAGGCCGGCGCGGGGTGGGGGCCAGGGGTCCG	13565625	+		NM_001004019.1	GI:51873052	precursor; isoform a is encoded by transcript variant 1; go_component: extracellular space; go_component: extracellular matrix (sensu Metazoa); go_component: extracellular matrix (sensu Metazoa); go_function: calcium ion binding; go_function: calcium ion binding; go_function: extracellular matrix structural constituent	fibulin 2 precursor; isoform a	343	TRUE	3:13565308-13566364	-6.25527	-6.38165	-6.09973	-0.281917	0.312044	0.0880467	3.54408	0.000491508	0.00687677	-6.02512	-6.27862	-5.77162	-0.507	0.0435503
cg10261191	MGC39545	11	124.87	403312	+	36.1	NCBI:RefSeq	GTGTGGAGGTGCCGAGGCCCAGCGGGGTTAGCGTGGTGAAATCTCCACCG	124870320	+		NM_203452.1	GI:44888826		hypothetical protein LOC403312	366	TRUE	11:124869760-124871878	-2.68114	-2.75769	-2.58693	-0.170754	0.153063	0.0548305	2.79156	0.0057591	0.03787	-2.28301	-2.58045	-1.98558	-0.594867	0.000310695
cg14287603	EPB41L5	2	120.488	57669	+	36.1	NCBI:RefSeq	CGAACTGAGTTTGTGTCACTGTCTTGGTGGACTTTTCGAGCTAACCTGTA	120487139	+	BE37; FLJ12957; KIAA1548;	NM_020909.2	GI:40254948	go_component: membrane; go_component: cytoplasm; go_component: cytoskeleton; go_function: binding; go_function: cytoskeletal protein binding	erythrocyte membrane protein band 4.1 like 5	500	TRUE	2:120486705-120487824	-4.68876	-4.77398	-4.58388	-0.190094	0.211854	0.0559376	3.78734	0.000201887	0.00362816	-5.5819	-5.70703	-5.45676	-0.250271	1.8335e-05
cg12620111	ZNF70	22	22.4235	7621	-	36.1	NCBI:RefSeq	CGGCCAGAGCCACCATGCCGACTGGAGAGACTCTCCTGATTCGGGTCCTT	22423279	-	Cos17; MGC48959;	NM_021916.2	GI:31340618	zinc finger protein N27C7-1; go_component: nucleus; go_function: zinc ion binding; go_function: metal ion binding; go_function: transcription factor activity; go_process: transcription; go_process: regulation of transcription; DNA-dependent	zinc finger protein 70	217	TRUE	22:22422955-22424191	-5.02683	-5.10459	-4.93112	-0.173462	0.146612	0.0557085	2.63177	0.00916333	0.0513381	-5.51229	-5.57737	-5.44721	-0.13016	0.0063187
cg17269548	PPIA	7	44.8028	5478	+	36.1	NCBI:RefSeq	CGCCACCGCCGAGGAAAACCGTGTACTATTAGCCATGGTCAACCCCACCG	44802777	+	CYPA; CYPH; MGC12404; MGC23397; MGC117158;	NM_021130.2	GI:45439309	isoform 1 is encoded by transcript variant 1; peptidyl-prolyl cis-trans isomerase A; T cell cyclophilin; rotamase; cyclosporin A-binding protein; go_component: cytoplasm; go_function: isomerase activity; go_function: virion binding; go_function: cyclosporin A binding; go_function: unfolded protein binding; go_function: peptidyl-prolyl cis-trans isomerase activity; go_process: protein folding; go_…	peptidylprolyl isomerase A isoform 1	38	TRUE	7:44801387-44803694	-1.97795	-2.08464	-1.84664	-0.238005	0.292204	0.0966002	3.02488	0.00281711	0.0231703	-1.91506	-1.99944	-1.83067	-0.168773	0.0184737
cg00079563	ARFGAP3	22	41.5835	26286	-	36.1	NCBI:RefSeq	GGCGAAATGGCGATCGACCAGGCGAAACGTTGGTGGATCCTATGGCAGCG	41583244	-	ARFGAP1;	NM_014570.3	GI:28416437	ADP-ribosylation factor GTPase activating protein 1; go_component: cytosol; go_function: metal ion binding; go_function: protein transporter activity; go_function: ARF GTPase activator activity; go_process: ER to Golgi transport; go_process: protein secretion; go_process: regulation of GTPase activity; go_process: vesicle-mediated transport; go_process: intracellular protein transport	ADP-ribosylation factor GTPase activating protein 3	221	TRUE	22:41582136-41584116	-6.11372	-6.20294	-6.00392	-0.199014	0.215251	0.0653002	3.29632	0.00116092	0.0125838	-5.86189	-6.19636	-5.52741	-0.66895	0.010494
cg10210238	CDKN2B	9	21.996	1030	-	36.1	NCBI:RefSeq	CGGGGGACTGACGCCAGGTTCCCCAGCCGCCCACAACGACTTTATTTTCT		-	P15; MTS2; TP15; INK4B;	NT_008413.17	cyclin-dependent kinase inhibitor 2B isoform 2	isoform 2 is encoded by transcript variant 2; p15 CDK inhibitor; cyclin-dependent kinases 4 and 6 binding protein; multiple tumor suppressor 2; p14_CDK inhibitor; p14_INK4B; p15_INK4B; CDK4B inhibitor; CDK inhibitory protein; cyclin-dependent kinase 4 inhibitor B; go_component: nucleus; go_component: cytoplasm; go_function: kinase activity; go_function: protein binding; go_function: cyclin-depend…			TRUE	9:21995095-21996291	-5.35159	-5.45385	-5.22574	-0.22811	0.22391	0.0809866	2.76478	0.00623441	0.0398751	-2.32525	-2.71256	-1.93794	-0.774618	0.00175738
cg23858074	C6orf167	6	97.8374	253714	-	36.1	NCBI:RefSeq	GCAAAGAAATGTCTGCAGGACATAGCGTCCCGGGCTTGCCTAGAACTGCG	97837773	-	FLJ46180; KIAA1900; dJ39B17.2; DKFZp781C2113; DKFZp686C20164;	NM_198468.1	GI:38348255	synonyms: FLJ46180; KIAA1900; dJ39B17.2; DKFZp781C2113; DKFZp686C20164	hypothetical protein LOC253714	332	TRUE	6:97837262-97838188	-5.96328	-6.07818	-5.82186	-0.25632	0.228243	0.0750447	3.04142	0.00267338	0.0224179	-6.06918	-6.12161	-6.01675	-0.104864	0.049526
cg10753582	KIFAP3	1	168.31	22920	-	36.1	NCBI:RefSeq	CGGTGGCCAAAGTACCCTCACACCCAGAGGCGATGACAGTCCTGAGGCCT	168310503	-	KAP3; SMAP; Smg-GDS; FLJ22818; dJ190I16.1;	NM_014970.2	GI:18105053	smg GDS-associated protein; small G protein GDP dissociation stimulator; go_component: kinesin complex; go_component: kinesin II complex; go_component: endoplasmic reticulum; go_function: binding; go_function: kinesin binding; go_function: protein binding; go_process: signal transduction; go_process: microtubule-based process; go_process: protein complex assembly	kinesin-associated protein 3	203	TRUE	1:168310096-168310758	-4.71076	-4.78903	-4.61442	-0.174618	0.188957	0.0484019	3.90391	0.000129734	0.00261692	-4.91005	-5.02103	-4.79907	-0.221962	6.78049e-05
cg11934695	ADRA1D	20	4.17809	146	-	36.1	NCBI:RefSeq	GGCTTGGGCACCTGCGGAGAGGCGTGGGTGGCTGCTGCGGGACCCGAGCG	4177659	-	DAR; ADRA1; ADRA1A; ADRA1R; ALPHA1; dJ779E11.2;	NM_000678.2	GI:15451784	adrenergic; alpha-1A-; receptor; adrenergic; alpha -1D-; receptor; go_component: integral to plasma membrane; go_function: receptor activity; go_function: adrenoceptor activity; go_function: rhodopsin-like receptor activity; go_function: alpha1-adrenergic receptor activity; go_process: development; go_process: DNA metabolism; go_process: signal transduction; go_process: cell proliferation; go_pro…	alpha-1D-adrenergic receptor	433	TRUE	20:4176404-4178574	-5.08285	-5.24867	-4.87876	-0.36991	0.400415	0.0787637	5.08375	8.54485e-07	5.51665e-05	-2.65519	-3.05715	-2.25323	-0.803923	0.00817055
cg25738273	DUSP26	8	33.5769	78986	-	36.1	NCBI:RefSeq	CCAAGACAGGTTGACAGATTAGCAGCTATTTTTAAGCCATGACACACACG	33576981	-	MKP8; LDP-4; NATA1; SKRP3; MGC1136; MGC2627;	NM_024025.1	GI:13128967	Novel amplified gene in thyroid anaplastic cancer; mitogen-activated protein kinase phosphatase 8; dual-specificity phosphatase SKRP3; low-molecular-mass dual-specificity phosphatase 4; go_function: kinase activity; go_function: hydrolase activity; go_function: protein tyrosine/serine/threonine phosphatase activity; go_process: protein amino acid dephosphorylation	dual specificity phosphatase 26	103	TRUE	8:33576371-33577197	-4.90489	-4.97363	-4.82028	-0.153342	0.166615	0.0523161	3.18477	0.001683	0.0163961	-4.25873	-4.30597	-4.21148	-0.0944922	0.0127582
cg01661993	TTYH1	19	59.6188	57348	+	36.1	NCBI:RefSeq	CGGCCCCCAGCCTCCGGCGGAGCTCAGGAAATCTGTGACCCAGCCCCCTT	59618447	+		NM_020659.2	GI:53831987	isoform 1 is encoded by transcript variant 1; tweety (Drosophila) homolog 1; go_component: integral to membrane; go_function: iron ion transporter activity; go_process: iron ion transport	tweety 1 isoform 1	331	TRUE	19:59618082-59618801	-3.91987	-3.99491	-3.8275	-0.167414	0.161757	0.0565082	2.86255	0.00465462	0.0327174	-3.3535	-3.39037	-3.31663	-0.0737382	0.00416704
cg21850254	ZNF570	19	42.6517	148268	+	36.1	NCBI:RefSeq	GTATCCAGCACAATTCTAGGAATTCGCCTCCCACCCATTTTGAGTAGACG	42651822	+	FLJ30791;	NM_144694.1	GI:21389598	go_component: nucleus; go_function: zinc ion binding; go_function: nucleic acid binding; go_process: regulation of transcription; DNA-dependent	zinc finger protein 570	129	TRUE	19:42650767-42652627	-4.61551	-4.69633	-4.51603	-0.180298	0.209221	0.0728152	2.87331	0.00450515	0.0320607	-5.40673	-5.66518	-5.14829	-0.516887	0.000198708
cg07127225	FCGRT	19	54.7084	2217	+	36.1	NCBI:RefSeq	CGGGCTCGGTCCAGACTGACAACAATGCCCTCCTCGTACCTGAAGAACTT	54708304	+	FCRN;	NM_004107.3	GI:34222296	FcRN protein; IgG Gc receptor; FcRn alpha chain; neonatal Fc-receptor; go_component: membrane; go_component: integral to membrane; go_component: MHC class I protein complex; go_function: IgG binding; go_function: receptor activity; go_function: MHC class I receptor activity; go_process: pregnancy; go_process: antigen presentation	Fc fragment of IgG; receptor; transporter; alpha	46	TRUE	19:54708027-54708589	-5.31454	-5.43484	-5.16648	-0.268353	0.294732	0.100676	2.92754	0.00381658	0.02875	-6.69342	-6.90476	-6.48208	-0.422684	0.0228533
cg23190203	SFXN3	10	102.781	81855	+	36.1	NCBI:RefSeq	CGCCCTAGCTCATTCCGCAAATTTAGGGCTTGGGTCTGGCTTGTTCCCCT	102780986	+	SFX3; BA108L7.2;	NM_030971.3	GI:49472836	synonyms: SFX3; BA108L7.2	sideroflexin 3	86	TRUE	10:102780693-102781185	-5.55017	-5.65887	-5.41637	-0.242499	0.227173	0.0680769	3.33701	0.0010114	0.0114576	-6.714	-6.77742	-6.65059	-0.126834	0.0450605
cg09383789	C1orf159	1	1.04123	54991	-	36.1	NCBI:RefSeq	CGCCGACCCGGCCGCCCAGACGGACCCCAGCGCCCCAACCCGCTACCCTC	1041332	-	FLJ20584; FLJ36119; RP11-465B22.4;	NM_017891.2	GI:40254912	synonyms: FLJ20584; FLJ36119; RP11-465B22.4	hypothetical protein LOC54991	105	TRUE	1:1040340-1042369	-4.48106	-4.59413	-4.34191	-0.25222	0.259188	0.0911014	2.84505	0.00490727	0.0338691	-4.08584	-4.18745	-3.98424	-0.203217	0.00316685
cg23481748	UNQ9438	14	57.9323	387990	+	36.1	NCBI:RefSeq	CGGGAGCCCTCACAGCCACAGAGTAGCAGAGCTCTGTTCGAACCTACGTC	57932385	+		NM_207377.1	GI:46409383	go_component: mitochondrial outer membrane translocase complex; go_process: protein targeting	hypothetical protein LOC387990	129	TRUE	14:57932076-57933064	-4.50803	-4.59677	-4.39882	-0.197948	0.176548	0.0602507	2.93022	0.00378513	0.0286282	-4.85602	-4.91751	-4.79453	-0.122981	0.00744156
cg12460541	ITPKA	15	39.5729	3706	+	36.1	NCBI:RefSeq	GGGAGCAGCCTCAGCTAGTCCCTGGGGCAGAGTCTCCACTTGGGTGCACG	39573414	+		NM_002220.1	GI:4504788	go_function: kinase activity; go_function: calmodulin binding; go_function: transferase activity; go_function: inositol trisphosphate 3-kinase activity; go_process: signal transduction; go_process: signal transduction	1D-myo-inositol-trisphosphate 3-kinase A	562	TRUE	15:39572496-39575890	-2.68535	-2.77733	-2.57216	-0.205169	0.222511	0.0485488	4.58325	8.09631e-06	0.00033084	-2.88285	-2.93171	-2.83398	-0.0977329	0.000192061
cg17386433	FAM76A	1	27.9253	199870	+	36.1	NCBI:RefSeq	GCAGCTGTGCAAGGTGCGCGGGCTGGGGCGGCGGCCGGGAACTGGGGACG	27925077	+	MGC34648; RP3-426I6.1;	NM_152660.1	GI:22749340	synonyms: MGC34648; RP3-426I6.1	family with sequence similarity 76; member A	218	TRUE	1:27924479-27925786	-5.84118	-5.94097	-5.71837	-0.222601	0.249932	0.0844324	2.96014	0.00345042	0.0267551	-6.21962	-6.395	-6.04424	-0.350756	0.0211953
cg09009042	PPP1R8	1	28.0296	5511	+	36.1	NCBI:RefSeq	CGTCCTCCTGCAAACGCTTCTTGGCTCTAAAATCTTGGGACTAAGCCGTG	28029880	+	ARD1; ARD-1; NIPP1; NIPP-1; PRO2047;	NM_002713.2	GI:20336236	isoform gamma is encoded by transcript variant 3; protein phosphatase-1; regulatory subunit-8; homolog of E.coli RNase E; nuclear subunit of PP-1; nuclear inhibitor of protein phosphatase-1; activator of RNA decay; go_component: spliceosome complex; go_function: DNA binding; go_function: RNA binding; go_function: hydrolase activity; go_function: endonuclease activity; go_function: magnesium ion b…	protein phosphatase 1 regulatory inhibitor subunit 8 isoform gamma	232	TRUE	1:28029243-28030548	-4.75008	-4.85115	-4.62568	-0.225471	0.227001	0.0548867	4.13581	5.22412e-05	0.00132828	-5.02028	-5.0949	-4.94567	-0.14923	0.00472543
cg20752438	C9orf127	9	35.8191	51754	+	36.1	NCBI:RefSeq	TATTGGTCCCCAACTTAGTCCTGCTGGGCTTCGAGGACACACAGACTCCG	35819266	+	NGX6; NAG-5; MGC120460; RP11-112J3.10;	NM_016446.2	GI:27552763	cytoplasmic protein; nasopharyngeal carcinoma related protein; go_component: cell surface; go_component: plasma membrane; go_function: protein binding; go_process: cell-matrix adhesion; go_process: regulation of progression through mitotic cell cycle	chromosome 9 open reading frame 127	154	TRUE	9:35818700-35819622	-3.97905	-4.0251	-3.92237	-0.102733	0.132844	0.0405108	3.27923	0.00122968	0.0131151	-4.4998	-4.61802	-4.38159	-0.236438	0.00110277
cg20077393	CGN	1	149.75	57530	+	36.1	NCBI:RefSeq	CGGAGATATTTTCTGCAGAAAGTGACGAAAGAGCATTCTGGTTCCTGCAG	149750500	+	KIAA1319;	NM_020770.1	GI:16262451	go_component: myosin; go_component: tight junction; go_function: actin binding; go_function: motor activity; go_function: protein binding; go_process: biological process unknown	cingulin	451	TRUE	1:149749916-149750891	-5.32562	-5.39055	-5.2457	-0.144857	0.175359	0.0639019	2.74419	0.00662361	0.0414126	-5.45779	-5.68546	-5.23011	-0.455352	3.35218e-07
cg06572160	KCNC3	19	55.5237	3748	-	36.1	NCBI:RefSeq	CGTGCTCAACTACTACCGCACCGGCAAGCTGCACTGCCCAGCCGACGTGT	55524446	-	KV3.3; KSHIIID;	NM_004977.2	GI:24497459	voltage-gated potassium channel protein KV3.3; go_component: membrane; go_component: membrane fraction; go_component: integral to membrane; go_component: voltage-gated potassium channel complex; go_function: protein binding; go_function: potassium ion binding; go_function: voltage-gated potassium channel activity; go_process: cation transport; go_process: potassium ion transport	Shaw-related voltage-gated potassium channel protein 3	733	TRUE	19:55522929-55526307	-5.25083	-5.34573	-5.13403	-0.211696	0.210379	0.0623281	3.37534	0.000887156	0.0104645	-3.69645	-4.15544	-3.23746	-0.917982	1.36055e-06
cg21686523	PHF22	4	106.849	57117	-	36.1	NCBI:RefSeq	CGGACCGAGCATATTTCTAGGTCTAGGGACAAGGGACTTGGAATCCTGCC	106849278	-	INT12; INTS12; SBBI22;	NM_020395.2	GI:21361850	integrator complex subunit 12; go_function: protein binding; go_function: zinc ion binding; go_function: metal ion binding; go_process: regulation of transcription; DNA-dependent	PHD finger protein 22	248	TRUE	4:106848846-106849842	-6.08125	-6.18481	-5.95378	-0.231022	0.230689	0.0695299	3.31783	0.0010795	0.0120045	-6.47446	-6.58129	-6.36763	-0.213654	0.0300051
cg25251635	POP7	7	100.141	10248	+	36.1	NCBI:RefSeq	CGCTGTGAGCCCTAAGCCCAGGCTTCACGGGTCCCCAAGGAACGCTGACC	100141705	+	RPP2; RPP20; 0610037N12Rik;	NM_005837.1	GI:5032046	ribonuclease P protein subunit p20; POP7 (processing of precursor; S. cerevisiae) homolog; go_component: nucleus; go_component: nucleolar ribonuclease P complex; go_function: hydrolase activity; go_function: protein binding; go_function: nucleic acid binding; go_function: ribonuclease P activity; go_process: tRNA processing	processing of precursor 7; ribonuclease P subunit	599	TRUE	7:100140942-100142901	-5.24616	-5.35951	-5.10664	-0.252869	0.262916	0.0740512	3.55047	0.000480432	0.00677705	-5.24811	-5.37068	-5.12553	-0.24515	1.76401e-05
cg17787710	RAC3	17	77.5823	5881	+	36.1	NCBI:RefSeq	CGGGGCCAGAATGTATCACAAAGTGCAAACGCGCTGTATTTCCAAACCCC	77582821	+		NM_005052.2	GI:38683861	rho family; small GTP binding protein Rac3; go_function: GTP binding; go_function: nucleotide binding; go_process: protein transport; go_process: small GTPase mediated signal transduction	ras-related C3 botulinum toxin substrate 3 (rho family; small GTP binding protein Rac3)	493	TRUE	17:77581410-77583297	-5.47916	-5.57162	-5.36535	-0.206269	0.224139	0.0839469	2.67	0.00821511	0.0477265	-5.23575	-5.32069	-5.15081	-0.169883	0.00455935
cg23356993	TIMP2	17	74.4331	7077	-	36.1	NCBI:RefSeq	TCTACGGATGTGTTTGCTGCGGGCTTGGGCCGGGCCGCAGTTTTATTGCG	74433067	-	CSC-21K;	NM_003255.4	GI:73858577	tissue inhibitor of metalloproteinase 2; tissue inhibitor of metalloproteinases 2; go_component: extracellular matrix (sensu Metazoa); go_function: enzyme inhibitor activity; go_function: metalloendopeptidase inhibitor activity	tissue inhibitor of metalloproteinase 2 precursor	28	TRUE	17:74432198-74433640	-6.23286	-6.41494	-6.00876	-0.406177	0.405509	0.0983693	4.12231	5.51426e-05	0.00138664	-5.73569	-5.97716	-5.49422	-0.482944	0.00280578
cg12651014	CCDC7	10	32.7753	221016	+	36.1	NCBI:RefSeq	TCTTCCTCAGGCAAATAGTTTTTCACCTTAGAGCCAGCAAGGCCAAACCG	32775047	+	FLJ32762; DKFZp686N0559; RP11-479G22.1;	NM_145023.4	GI:71051594	synonyms: FLJ32762; DKFZp686N0559; RP11-479G22.1	coiled-coil domain containing 7	251	TRUE	10:32774788-32775552	-4.97996	-5.08093	-4.85568	-0.225255	0.227054	0.0720752	3.15024	0.00188429	0.0177281	-5.70649	-5.82469	-5.58828	-0.236408	0.0175009
cg14727952	BIRC2	11	101.724	329	+	36.1	NCBI:RefSeq	CTTGCAGTCAAAGCGATTTTTAAAATGACTTGTTTTCAAGCCTCTGGCCG	101723176	+	API1; MIHB; HIAP2; RNF48; cIAP1; Hiap-2;	NM_001166.3	GI:41349435	NFR2-TRAF signalling complex protein; apoptosis inhibitor 1; go_component: intracellular; go_function: zinc ion binding; go_function: metal ion binding; go_function: protein binding; go_function: protein binding; go_function: signal transducer activity; go_process: anti-apoptosis; go_process: regulation of apoptosis; go_process: cell surface receptor linked signal transduction; go_process: positi…	baculoviral IAP repeat-containing protein 2	392	TRUE	11:101722617-101723635	-4.66731	-4.78127	-4.52705	-0.25422	0.222125	0.0762956	2.91137	0.00401107	0.0297793	-5.34888	-5.45954	-5.23822	-0.221324	0.00911402
cg01439983	PEX13	2	61.0975	5194	+	36.1	NCBI:RefSeq	CTAAGATCTTTTAAAACTCATTTCCCTACCGAAGGGTGTCATTCGTAACG	61098374	+	ZWS; NALD;	NM_002618.2	GI:46047483	go_component: peroxisome; go_component: integral to membrane; go_component: membrane fraction; go_component: integral to peroxisomal membrane; go_function: protein binding; go_process: protein transport; go_process: protein import into peroxisome matrix; docking	peroxisome biogenesis factor 13	877	TRUE	2:61097460-61098922	-4.96801	-5.12138	-4.77924	-0.342143	0.356874	0.0752868	4.74019	4.07289e-06	0.00019462	-5.458	-5.55118	-5.36481	-0.186367	0.00412954
cg14425294	GUCY2D	17	7.84636	3000	+	36.1	NCBI:RefSeq	CGGATTACCCACAGCTGTCCACGGGCAGGCACTTGTTACTTTCTGGCTGA	7846713	+	LCA; CYGD; LCA1; CORD6; GUC2D; retGC; GUC1A4; RETGC-1; ROS-GC1;	NM_000180.1	GI:4504216	go_component: nuclear outer membrane; go_component: integral to plasma membrane; go_function: ATP binding; go_function: receptor activity; go_function: protein kinase activity; go_function: guanylate cyclase activity; go_process: cGMP biosynthesis; go_process: sensory perception; go_process: visual perception; go_process: intracellular signaling cascade; go_process: protein amino acid phosphoryla…	guanylate cyclase 2D; membrane (retina-specific)	352	FALSE		-4.82209	-4.89954	-4.72677	-0.172769	0.162073	0.0428023	3.78655	0.000202487	0.00363259	-4.55987	-4.64041	-4.47933	-0.161081	0.000145928
cg22344641	TRUB2	9	130.124	26995	-	36.1	NCBI:RefSeq	CGTGGGTCTGGTTCGAGGCACTCACCCTTCAGAAGTTGTAGCTCCACTGT	130124518	-	CLONE24922; RP11-339B21.1;	NM_015679.1	GI:7661555	go_function: pseudouridylate synthase activity; go_process: RNA processing	TruB pseudouridine (psi) synthase homolog 2	143	TRUE	9:130124180-130125476	-3.83617	-3.89736	-3.76087	-0.136491	0.135781	0.0504538	2.6912	0.00772835	0.0458954	-3.16973	-3.3472	-2.99226	-0.354937	1.72308e-10
cg15755406	MGC10471	19	13.7201	81576	+	36.1	NCBI:RefSeq	CGCCGAGTTAAACGTTTGGCAGTTTAGTCATTTCTGCTGCTCACGGTTTT	13719753	+		NM_030818.2	GI:34147391	go_component: cellular component unknown; go_function: protein binding; go_process: response to virus	hypothetical protein LOC81576	384	TRUE	19:13719267-13720489	-5.31529	-5.4316	-5.17214	-0.259464	0.263508	0.0998562	2.63887	0.0089802	0.0506288	-9.51693	-9.97252	-9.06133	-0.911182	0.0110237
cg15676084	ENAH	1	223.908	55740	-	36.1	NCBI:RefSeq	CGAGTTGATGTGCACACTAGGTATAGGGATGACTTCATCCCCAAACGAAC	223907468	-	MENA; NDPP1;	NM_018212.4	GI:56549692	isoform b is encoded by transcript variant 2; go_process: cell differentiation; go_process: nervous system development	enabled homolog isoform b	760	TRUE	1:223906627-223908504	-5.22457	-5.29278	-5.14063	-0.152148	0.155498	0.0546192	2.84695	0.00487932	0.0337553	-4.17692	-4.34897	-4.00487	-0.344103	0.00262732
cg25023941	QPRT	16	29.5975	23475	+	36.1	NCBI:RefSeq	CGGCCCTGTTATGCCATTTTAAAGCTAAGGAAACTGAGGCACAGAAAAAG	29597942	+	QPRTase;	NM_014298.3	GI:45269148	nicotinate-nucleotide pyrophosphorylase (carboxylating); go_function: transferase activity; transferring glycosyl groups; go_function: nicotinate-nucleotide diphosphorylase (carboxylating) activity; go_process: NAD biosynthesis; go_process: synaptic transmission; go_process: generation of precursor metabolites and energy	quinolinate phosphoribosyltransferase	406	FALSE		2.77334	2.82633	2.70812	0.118213	-0.139918	0.0532744	-2.62637	0.00930502	0.0518639	3.05991	3.13455	2.98526	0.149288	0.0189049
cg11706111	ZNF19	16	70.0806	7567	-	36.1	NCBI:RefSeq	CGCCCAACTGTGGGTCCTTGCACTTTGGCACCTTTGAGCGCGGACTCAAA	70080742	-	KOX12; MGC51021;	NM_006961.2	GI:38045955	zinc finger protein KOX12; go_component: nucleus; go_component: nucleus; go_function: zinc ion binding; go_function: metal ion binding; go_function: nucleic acid binding; go_function: transcription factor activity; go_process: transcription; go_process: regulation of transcription; DNA-dependent; go_process: regulation of transcription; DNA-dependent	zinc finger protein 19	97	TRUE	16:70080524-70081125	2.5576	2.71503	2.36383	0.351206	-0.342659	0.0516082	-6.63961	2.95644e-10	9.22544e-08	-0.0396037	0.218895	-0.298102	0.516997	1.06068e-05
cg02981703	CA6	1	8.92832	765	+	36.1	NCBI:RefSeq	TAAGACACTGAACAACCAAACCCATGGACTGACCGGATATGAAATTGACG	8928509	+	GUSTIN; MGC21256;	NM_001215.2	GI:70167126	carbonate dehydratase VI; go_function: lyase activity; go_function: zinc ion binding; go_function: metal ion binding; go_function: carbonate dehydratase activity; go_function: carbonate dehydratase activity; go_process: one-carbon compound metabolism	carbonic anhydrase VI precursor	188	FALSE		1.66325	1.77201	1.52939	0.242619	-0.230333	0.0467067	-4.93148	1.72374e-06	9.83394e-05	0.760659	0.986157	0.535162	0.450995	0.00170674
cg27349244	MLXIP	12	121.178	22877	+	36.1	NCBI:RefSeq	CGGCTCAATAATGCCATCTGGCGGGCCTGGTACATGCAGTGTAAGTGCCG	121177744	+	MIR; MONDOA; KIAA0867;	NM_014938.2	GI:40353215	Mlx interactor; go_component: nucleus; go_function: transcription regulator activity; go_process: regulation of transcription	mondoA	128	FALSE		5.07046	5.17579	4.94083	0.234964	-0.225177	0.0829346	-2.71511	0.00721066	0.0438841	3.1513	3.29493	3.00767	0.287258	0.0228533
cg06403553	PGK2	6	49.8628	5232	-	36.1	NCBI:RefSeq	ATCTGGTTCTTCTTCATGGGAACATTGAAGTCTACTCTCATGATGACTCG	49862966	-	PGKB; PGK-2; PGKPS; dJ417L20.2;	NM_138733.2	GI:31543396	phosphoglycerate kinase 1; pseudogene 2; phosphoglycerate kinase autosomal pseudogene; go_component: cytosol; go_function: ATP binding; go_function: transferase activity; go_function: phosphoglycerate kinase activity; go_function: phosphoglycerate kinase activity; go_process: glycolysis; go_process: glycolysis; go_process: phosphorylation; go_process: phosphorylation	phosphoglycerate kinase 2	159	FALSE		3.84788	3.91923	3.76007	0.159164	-0.162468	0.0560745	-2.89737	0.00418675	0.0306201	0.358281	0.688069	0.0284926	0.659576	5.51876e-05
cg24585690	IL9	5	135.259	3578	-	36.1	NCBI:RefSeq	CGGACTGGAGCTCGCTTGCAGACACCTTCAAATCGAGTGGTATTTAAAGC	135259415	-	P40; HP40; IL-9;	NM_000590.1	GI:10834979	p40 T-cell and mast cell growth factor; T-cell growth factor p40; p40 cytokine; p40 protein; homolog of mouse T cell and mast cell growth factor 40; go_component: extracellular space; go_function: interleukin-9 receptor binding; go_process: cell-cell signaling; go_process: inflammatory response; go_process: positive regulation of cell proliferation; go_process: positive regulation of interleukin-…	interleukin 9 precursor	2	FALSE		1.69065	1.77423	1.58778	0.186447	-0.178307	0.0631654	-2.82285	0.00524578	0.0355618	-1.82897	-0.972189	-2.68576	1.71357	1.44182e-07
cg19731122	MYO1C	17	1.34315	4641	-	36.1	NCBI:RefSeq	CGGGACAGCCCCCTGTCCGGGCCCTGCATGACCAGGCCCCAGCAGCCCTG	1342745	-	myr2; MYO1E;	NM_033375.3	GI:46485767	myosin-I beta; go_component: myosin; go_component: unconventional myosin; go_function: ATP binding; go_function: actin binding; go_function: motor activity; go_function: calmodulin binding; go_function: nucleotide binding; go_process: detection of sound	myosin IC	400	FALSE		-0.109867	-0.0779993	-0.149088	0.0710888	-0.0948212	0.0351421	-2.69823	0.00757292	0.045299	-0.299446	0.00950644	-0.608398	0.617904	0.00157818
cg11948328	HSD17B12	11	43.659	51144	+	36.1	NCBI:RefSeq	TCACGAAGGTAGTGAGGCCTAGTGGAAAGCCATGGAGAGCGCTCTCCCCG	43658881	+	KAR;	NM_016142.1	GI:7705854	3-ketoacyl-CoA reductase; go_function: oxidoreductase activity; go_process: metabolism	steroid dehydrogenase homolog	90	TRUE	11:43658154-43659332	-2.78461	-2.41512	-3.23936	0.824241	-0.73363	0.0945746	-7.75716	4.49819e-13	3.43112e-10	-3.30003	-3.05563	-3.54442	0.488785	2.19559e-10
cg12271587	TTF1	9	134.273	7270	-	36.1	NCBI:RefSeq	GAGCACAGAGTGAATCCACACAGTGAACCCACAGGGTGACAGACAGGTCG	134272042	-		NM_007344.2	GI:33356178	go_component: nucleus; go_component: nucleus; go_function: DNA binding; go_function: transcription termination factor activity; go_process: regulation of transcription; go_process: transcription termination	transcription termination factor; RNA polymerase I	572	FALSE		2.57186	2.65382	2.47098	0.182834	-0.177704	0.0611862	-2.90431	0.0040988	0.0301697	1.19297	1.42721	0.958719	0.468494	0.0291489
cg05105913	XYLT2	17	45.778	64132	+	36.1	NCBI:RefSeq	CGGGGCAAAGTCTAACCCCTTGACTGGCATCAGAGAGCCTTCACGAATCC	45778392	+	XT2; XT-II; xylT-II;	NM_022167.1	GI:11545913	UDP-D-xylose:proteoglycan core protein beta-D-xylosyltransferase; go_component: membrane; go_component: Golgi stack; go_component: integral to membrane; go_component: endoplasmic reticulum; go_function: acetylglucosaminyltransferase activity; go_function: protein xylosyltransferase activity; go_function: transferase activity; transferring glycosyl groups; go_process: glycosaminoglycan biosynthesis	xylosyltransferase II	403	TRUE	17:45777822-45779295	-0.0306875	0.0169389	-0.0893046	0.106244	-0.13128	0.0334845	-3.9206	0.000121673	0.00249836	-0.0339376	0.348327	-0.416202	0.764529	0.00157818
cg10644878	LYPLA1	8	55.1769	10434	-	36.1	NCBI:RefSeq	GGCACGATGGCGGGCAGCGGGGTTGACATGTTATTGCCGCACATACACCG	55177130	-	LPL1; APT-1; LYSOPLA;	NM_006330.2	GI:20302148	lysophospholipase 1; lysophospholipid-specific lysophospholipase; acyl-protein thioesterase-1; go_component: membrane fraction; go_function: hydrolase activity; go_function: lysophospholipase activity; go_process: lipid metabolism; go_process: fatty acid metabolism	lysophospholipase I	189	TRUE	8:55176417-55177361	-0.467243	-0.353814	-0.606847	0.253033	-0.253041	0.0542164	-4.66723	5.61731e-06	0.000249329	-0.792706	-0.598338	-0.987075	0.388737	1.33591e-11
cg12476968	SLC12A6	15	32.3981	9990	-	36.1	NCBI:RefSeq	CGGCTTCGATCTCTCAAGAGCCTAGTTTAGCAGACATAAAAGCCCGGATT	32398222	-	KCC3; ACCPN; KCC3A; KCC3B; DKFZP434D2135;	NM_005135.1	GI:4826779	VEGF-inducible; predicted to have twelve membrane spanning domains; agenesis of corpus callosum and peripheral neuropathy (Andermann syndrome); potassium chloride cotransporter KCC3a-S3; go_component: membrane; go_component: membrane fraction; go_component: integral to plasma membrane; go_function: symporter activity; go_function: transporter activity; go_function: potassium ion binding; go_funct…	potassium chloride cotransporter KCC3	101	FALSE		-3.32589	-3.10438	-3.59851	0.494129	-0.498549	0.111751	-4.46126	1.36501e-05	0.00048891	-6.17612	-5.14062	-7.21161	2.07099	4.80301e-06
cg19767249	DCPS	11	125.679	28960	+	36.1	NCBI:RefSeq	CGGTAGTGTTGGAGCCCTTGTTTGAATACTGACATTTTAATCATAGTTAC	125678857	+	HSL1; HINT-5; HSPC015;	NM_014026.3	GI:37537717	histidine triad protein member 5; heat shock-like protein 1; homolog of C. elegans 7meGMP-directed hydrolase dcs-1; go_component: nucleus; go_function: hydrolase activity; go_process: mRNA catabolism; nonsense-mediated decay	mRNA decapping enzyme	10	TRUE	11:125678695-125679596	-4.20876	-4.36038	-4.02215	-0.338228	0.34554	0.0847039	4.07939	6.54191e-05	0.0015758	-4.7447	-4.82577	-4.66362	-0.162155	0.000454754
cg24445405	MIS12	17	5.33196	79003	+	36.1	NCBI:RefSeq	CGCACTTTATGAAATAATTTGCAATAAGCAGTACAGTCAAATCTTATGGG	5330971	+	hMis12; KNTC2AP; MGC2488; 2510025F08Rik;	NM_024039.1	GI:13128993	homolog of yeast Mis12; go_component: nucleus; go_component: chromosome; pericentric region; go_process: mitosis; go_process: cell cycle	MIS12 homolog	991	FALSE		1.92803	1.81966	2.06141	-0.241746	0.245753	0.0642145	3.82707	0.000173839	0.00325179	3.35682	3.28904	3.4246	-0.135552	0.0426648
cg07774222	MED6	14	70.1375	10001	-	36.1	NCBI:RefSeq	CGCCCACCACTGATGGAAGAATTCTGCCTTGATCGTCTGTGATCGTCAAG	70137137	-	NY-REN-28;	NM_005466.2	GI:42544154	go_component: nucleus; go_component: mediator complex; go_component: mediator complex; go_function: receptor activity; go_function: transcription coactivator activity; go_function: RNA polymerase II transcription factor activity; go_process: positive regulation of transcription from RNA polymerase II promoter	mediator of RNA polymerase II transcription; subunit 6 homolog	375	TRUE	14:70137008-70137575	-5.6413	-5.72578	-5.53733	-0.188449	0.206689	0.0786391	2.62833	0.00925334	0.0516597	-8.42908	-8.58728	-8.27088	-0.316404	0.0012566
cg11917694	STAMBPL1	10	90.6297	57559	+	36.1	NCBI:RefSeq	CGGTCAGCTGCATCAAGGCTTGTGTACTGTGCAGTCTTAAAAGGCACCAC	90630006	+	AMSH-FP; AMSH-LP; ALMalpha; FLJ31524; KIAA1373; bA399O19.2;	NM_020799.2	GI:52694663	associated molecule with the SH3 domain of STAM (AMSH) - Family Protein; go_function: metal ion binding; go_function: metallopeptidase activity; go_function: ubiquitin thiolesterase activity; go_process: ubiquitin cycle	associated molecule with the SH3 domain of STAM (AMSH) like protein	342	TRUE	10:90629646-90630982	-4.4608	-4.5398	-4.36356	-0.176246	0.166729	0.0530344	3.14378	0.00192428	0.0180057	-5.55283	-5.73298	-5.37267	-0.360308	5.86467e-05
cg20283107	FAM91A1	8	124.858	157769	+	36.1	NCBI:RefSeq	CGGGCCTTATCCCCACAGGAAGCAGTGGGTTTGTTATTGGAGAAACAGAT	124859508	+	FLJ23790; DKFZp666B104;	NM_144963.1	GI:21450642	skeletal muscle cells re-entry induced; go_function: oxygen binding	hypothetical protein LOC157769	1358	FALSE		-0.502381	-0.614416	-0.364493	-0.249923	0.21748	0.0543306	4.0029	8.84145e-05	0.00196854	-0.796651	-1.14264	-0.450664	-0.691974	7.83053e-05
cg02099418	CD28	2	204.279	940	+	36.1	NCBI:RefSeq	CGGTCACTACATGATGGGCTTATGGGAATTATTCTTTATTGATGGATATC	204279443	+	Tp44;	NM_006139.1	GI:5453610	go_component: integral to plasma membrane; go_component: external side of plasma membrane; go_function: coreceptor activity; go_function: protein self binding; go_process: cytokine biosynthesis; go_process: humoral immune response; go_process: positive regulation of mitosis; go_process: positive regulation of anti-apoptosis; go_process: positive regulation of T cell proliferation; go_process: pos…	CD28 antigen	52	FALSE		-3.34067	-3.39481	-3.27404	-0.120767	0.146629	0.0529241	2.77055	0.00612899	0.0394581	-5.21172	-5.33362	-5.08982	-0.243798	0.00197406
cg01907837	RNF8	6	37.4293	9025	+	36.1	NCBI:RefSeq	CAGTTGTACAATTGTCACCACAATCCACTTTTAGAACATTTCTATTACCG	37429769	+	KIAA0646;	NM_003958.2	GI:34304334	isoform 1 is encoded by transcript variant 1; C3HC4-type zinc finger protein; UBC13/UEV-interacting ring finger protein; ring finger protein (C3HC4 type) 8; go_component: nucleus; go_component: ubiquitin ligase complex; go_function: ligase activity; go_function: zinc ion binding; go_function: metal ion binding; go_function: protein binding; go_function: ubiquitin-protein ligase activity; go_proce…	ring finger protein 8 isoform 1	454	FALSE		0.861105	0.54065	1.25551	-0.714861	0.668677	0.0826719	8.08832	5.95181e-14	5.5717e-11	-0.254783	-0.550567	0.0410008	-0.591568	0.00148769
cg06193397	ENPP2	8	120.72	5168	-	36.1	NCBI:RefSeq	CGGAGTGCACTGCTTTGAGGCTCTGGGTTTAGTCTATTAACTATAAGCAA	120720251	-	ATX; PDNP2; LysoPLD; PD-IALPHA;	NM_006209.2	GI:20070229	Phosphodiesterase I/nucleotide pyrophosphatase 2; plasma lysophospholipase D; phosphodiesterase I/nucleotide pyrophosphatase 2 (autotaxin); go_component: plasma membrane; go_component: integral to plasma membrane; go_function: nucleic acid binding; go_function: endonuclease activity; go_function: hydrolase activity; go_function: phosphodiesterase I activity; go_function: transcription factor bind…	ectonucleotide pyrophosphatase/phosphodiesterase 2 (autotaxin)	1	FALSE		-2.87922	-2.95976	-2.7801	-0.179667	0.210297	0.0578027	3.63818	0.000350233	0.0054356	-2.95888	-3.17388	-2.74388	-0.429996	0.0163164
cg13817266	HSPA6	1	159.761	3310	+	36.1	NCBI:RefSeq	CGGCAGCAGCCTCCGTGGCCTCCAGCATCCGACAAGAAGCTTCAGCCATG	159760660	+		NM_002155.3	GI:42822885	heat shock 70kD protein 6 (HSP70B ); go_function: ATP binding; go_function: nucleotide binding; go_process: protein folding; go_process: response to unfolded protein	heat shock 70kDa protein 6 (HSP70B )	366	TRUE	1:159760402-159762148	-0.591775	-0.752394	-0.394091	-0.358303	0.417667	0.083612	4.9953	1.2869e-06	7.72705e-05	-0.238656	-0.385304	-0.0920083	-0.293295	1.00598e-07
cg14198172	HBXIP	1	110.752	10542	-	36.1	NCBI:RefSeq	GTCTGACCCCTGGGTTATTGTAAAACTTAAGATCTGTCCCCTAGGTCTCG	110752069	-	XIP; MGC71071;	NM_006402.2	GI:38788352	HBx-interacting protein; hepatitis B virus x-interacting protein (9.6kD); go_process: response to virus; go_process: viral genome replication	hepatitis B virus x-interacting protein	72	TRUE	1:110751314-110752210	-3.44223	-3.48846	-3.38534	-0.103118	0.122534	0.0395985	3.09442	0.00225729	0.019901	-3.46576	-3.68504	-3.24648	-0.438559	3.69979e-06
cg19669036	SNAP29	22	19.5424	9342	+	36.1	NCBI:RefSeq	CACTGCGCAGTTGGTTTACAGTCACAAAGCACTTTCAAGACAGTGTTTCG	19543292	+	CEDNIK; SNAP-29; FLJ21051;	NM_004782.2	GI:18765736	vesicle-membrane fusion protein SNAP-29; soluble 29 kDa NSF attachment protein	synaptosomal-associated protein 29	927	TRUE	22:19542197-19543793	-5.38923	-5.44964	-5.31488	-0.13476	0.168067	0.0482714	3.48171	0.000612977	0.00811328	-5.40883	-5.63768	-5.17999	-0.457686	1.08903e-05
cg09558850	TFPI2	7	93.3584	7980	-	36.1	NCBI:RefSeq	CGGGATTCGTTGCAATGGACCTTCAGATTAGATTAGAAATGTAAATAAGT	93358001	-	PP5; TFPI-2;	NM_006528.2	GI:31543803	go_component: extracellular matrix (sensu Metazoa); go_function: serine-type endopeptidase inhibitor activity; go_function: extracellular matrix structural constituent; go_process: blood coagulation	tissue factor pathway inhibitor 2	380	TRUE	7:93357211-93358411	-1.18202	-1.26824	-1.0759	-0.192338	0.166336	0.0412176	4.03557	7.77824e-05	0.00178587	-0.734879	-1.08716	-0.382596	-0.704566	0.000117034
cg23623692	ATP10A	15	23.5546	57194	-	36.1	NCBI:RefSeq	GTTAGGGTGGATCAGGTGGTCGGAATGAGTTAGGGTGGAGCAGGTGGTCG		-	ATPVA; ATPVC; ATP10C; KIAA0566;	NT_026446.13	ATPase; Class V; type 10A	ATPase; Class V; type 10C; ATPase type IV; phospholipid transporting (P-type); aminophospholipid translocase VA; phospholipid-transporting ATPase VA; go_component: membrane; go_component: integral to membrane; go_function: ATP binding; go_function: ATPase activity; go_function: hydrolase activity; go_function: nucleotide binding; go_function: magnesium ion binding; go_function: phospholipid-trans…			TRUE	15:23554004-23555229	2.90521	2.76962	3.07208	-0.30246	0.288178	0.0686427	4.19822	4.06242e-05	0.00110815	1.41625	1.35141	1.4811	-0.129691	0.00151731
cg04481779	IL20RA	6	137.408	53832	-	36.1	NCBI:RefSeq	CTCTCAGACTCTCAGGACTGACAGCCGAGTGGCTGGGGACTATAAATCCG	137407991	-	IL-20R1; ZCYTOR7;	NM_014432.2	GI:31083155	class II cytokine receptor ZCYTOR7; interleukin-20 receptor I; go_component: membrane; go_component: integral to membrane; go_function: receptor activity; go_function: hematopoietin/interferon-class (D200-domain) cytokine receptor activity; go_process: blood coagulation	interleukin 20 receptor; alpha	173	TRUE	6:137406829-137408018	-2.39831	-2.46337	-2.31822	-0.145147	0.156782	0.039137	4.00597	8.73595e-05	0.00195562	-2.42221	-2.73254	-2.11189	-0.620656	0.00574066
cg25947945	LAD1	1	199.636	3898	-	36.1	NCBI:RefSeq	CGGGCGCTCTAGACCCGAGATCACAGTACCTGCGCTAACTTTTCCGCTCG	199635292	-	LadA; MGC10355;	NM_005558.3	GI:32455232	linear IgA disease antigen homolog; linear IgA bullous dermatosis antigen; go_component: basement membrane; go_function: structural molecule activity	ladinin 1	277	TRUE	1:199634832-199635737	-4.03978	-4.14906	-3.90528	-0.243775	0.236453	0.0564702	4.18721	4.24766e-05	0.00114804	-1.671	-1.85056	-1.49143	-0.359134	0.0341305
cg07374928	FLJ21103	11	125.604	79607	+	36.1	NCBI:RefSeq	CGCATATGTATAGGGAACAAAAGTGTTCCAAGAAGAAATAATGAACAAAT	125604330	+		NM_024556.1	GI:13375720		hypothetical protein LOC79607	166	FALSE		2.0425	1.95014	2.15618	-0.206048	0.184332	0.0605996	3.04181	0.00267013	0.0223997	3.22224	3.11649	3.328	-0.211507	0.00241312
cg06973652	BRCA1	17	38.5321	672	-	36.1	NCBI:RefSeq	GTGTCTCCGGACAGCTAATCGTTTTAGTGACAGGATGAGAGAGCCCTTCG	38530994	-	IRIS; PSCP; BRCAI; BRCC1; RNF53;	NM_007294.2	GI:63252871	isoform 1 is encoded by transcript variant BRCA1a; breast and ovarian cancer susceptibility protein 1; breast and ovarian cancer suseptibility protein variant; go_component: nucleus; go_component: nucleus; go_component: intracellular; go_component: BRCA1-BARD1 complex; go_component: ubiquitin ligase complex; go_component: gamma-tubulin ring complex; go_function: DNA binding; go_function: DNA bind…	breast cancer 1; early onset isoform 1	1154	TRUE	17:38531525-38532730	2.31017	2.16212	2.4924	-0.33028	0.289904	0.0876985	3.30569	0.00112477	0.012302	2.77379	2.59177	2.95581	-0.364031	1.07477e-05
cg18601426	PTPRN2	7	158.074	5799	-	36.1	NCBI:RefSeq	CTTTGTCTTAGGACCTCTTGGAAGTGGCACTGTCTCCTGAGGAGGACACG	158073179	-	IAR; ICAAR; PTPRP; IA-2beta;	NM_002847.2	GI:19743910	isoform 1 precursor is encoded by transcript variant 1; protein tyrosine phosphatase receptor pi; tyrosine phosphatase IA-2 beta; IAR/receptor-like protein-tyrosine phosphatase; phogrin; go_component: integral to plasma membrane; go_function: receptor activity; go_function: hydrolase activity; go_function: protein tyrosine phosphatase activity; go_function: transmembrane receptor protein tyrosine…	protein tyrosine phosphatase; receptor type; N polypeptide 2 isoform 1 precursor	802	TRUE	7:158071751-158074029	-1.60044	-1.66906	-1.51598	-0.153085	0.161753	0.0382366	4.2303	3.56588e-05	0.00101017	-0.644688	-0.851945	-0.437431	-0.414515	0.0453678
cg09539271	PTHB1	7	33.1353	27241	+	36.1	NCBI:RefSeq	CGCAGGATCCCAGAGCACCATGGACAAGCCAGTGACGCCCCGCCCCCACT	33135677	+	B1; D1; C18; BBS9; MGC118917;	NM_014451.3	GI:75905798	isoform 1 is encoded by transcript variant 1; PTH-responsive osteosarcoma B1 protein; go_component: cellular component unknown; go_function: catalytic activity; go_process: biological process unknown	parathyroid hormone-responsive B1 isoform 1	350	TRUE	7:33135030-33136211	-6.42054	-6.50675	-6.31444	-0.192307	0.211412	0.0807482	2.61816	0.00952388	0.0526421	-6.14854	-6.23878	-6.05831	-0.180476	0.0116717
cg24710886	PUM1	1	31.3115	9698	-	36.1	NCBI:RefSeq	CGGCCACCCGCACTGCCCTGGCCCCAGAGGTGCAGGGTTCAAACCCCTTC	31311151	-	PUMH; HSPUM; PUMH1; PUML1; KIAA0099;	NM_001020658.1	GI:66932908	isoform 1 is encoded by transcript variant 1; pumilio (Drosophila) homolog 1; go_function: binding; go_function: RNA binding; go_process: regulation of translation	pumilio 1 isoform 1	373	TRUE	1:31310385-31312114	-4.92699	-4.99653	-4.8414	-0.155136	0.1616	0.0582243	2.77547	0.00604063	0.0391216	-5.87181	-5.96094	-5.78269	-0.178247	0.00579117
cg24475171	C9orf78	9	131.639	51759	-	36.1	NCBI:RefSeq	CGGAATGGTCTTCCAGAAAGGGGAACCCCAGACAGCCCCCATCGGCCCCT	131637381	-	HSPC220; bA409K20.3;	NM_016482.2	GI:24475983	isoform 1 is encoded by transcript variant 1; hepatocellular carcinoma-associated antigen 59	chromosome 9 open reading frame 78 isoform 1	1326	FALSE		-3.3427	-3.45629	-3.20289	-0.253403	0.258223	0.0580146	4.45099	1.42567e-05	0.000506235	-3.16571	-3.3806	-2.95081	-0.429788	4.86905e-06
cg24454143	FLT3	13	27.5733	2322	-	36.1	NCBI:RefSeq	CCTAATTGCCTTGGTTGACATTGAAACCCTGCCTGTTTTTCTTGATCCCG	27572705	-	FLK2; STK1; CD135;	NM_004119.1	GI:4758395	stem cell tyrosine kinase 1; go_component: membrane; go_component: integral to plasma membrane; go_function: ATP binding; go_function: receptor activity; go_function: nucleotide binding; go_function: transferase activity; go_function: vascular endothelial growth factor receptor activity; go_process: protein amino acid phosphorylation; go_process: positive regulation of cell proliferation; go_proc…	fms-related tyrosine kinase 3	560	TRUE	13:27571646-27573333	-0.762029	-0.813365	-0.698846	-0.114519	0.114762	0.0345467	3.32194	0.00106454	0.0119089	-1.36875	-1.68249	-1.05502	-0.627476	0.0046834
cg03690162	BAG3	10	121.4	9531	+	36.1	NCBI:RefSeq	AAGGCAGGTGAGTTTGCACTGACTTCCATTTTCTCCCTGGCTTCCTTCCG	121400872	+	BIS; BAG-3; CAIR-1; MGC104307;	NM_004281.3	GI:62530382	BAG-family molecular chaperone regulator-3; BCL2-binding athanogene 3; docking protein CAIR-1; Bcl-2-binding protein; go_component: cytosol; go_function: unfolded protein binding; go_function: Hsp70/Hsc70 protein regulator activity; go_process: apoptosis; go_process: anti-apoptosis; go_process: protein folding	BCL2-associated athanogene 3	429	TRUE	10:121400389-121401974	-4.37236	-4.42374	-4.30913	-0.114602	0.145578	0.0456571	3.18852	0.00166239	0.0162723	-4.39766	-4.6256	-4.16973	-0.455871	3.94734e-09
cg08508325	CARS	11	3.03561	833	-	36.1	NCBI:RefSeq	CGCTCCAGGCCTAGGGACCGCCCTGCCAATGACCCTGCGGAAAGCAAGCC	3035247	-	CYSRS; MGC:11246;	NM_001751.4	GI:62240990	isoform b is encoded by transcript variant 2; cysteine translase; cysteine-tRNA ligase; go_component: cytoplasm; go_component: soluble fraction; go_function: ATP binding; go_function: ligase activity; go_function: tRNA binding; go_function: metal ion binding; go_function: receptor activity; go_function: catalytic activity; go_function: nucleotide binding; go_function: cysteine-tRNA ligase activit…	cysteinyl-tRNA synthetase isoform b	368	TRUE	11:3034646-3035644	-2.23818	-2.33969	-2.11324	-0.226441	0.252253	0.0571704	4.41231	1.6784e-05	0.000565738	-2.3538	-2.59615	-2.11144	-0.484711	0.0295743	cg08508325rs384490	rs384490	11	cg08508325	CARS	3035615	3035461	-9.71565	2.16e-15	TRUE	9.07588	3.79e-14	TRUE
cg08700651	IL28RA	1	24.3861	163702	-	36.1	NCBI:RefSeq	CGGGAGAGGAATATCAAAGACCCGGTTCTGTTCAGTCCTGGGAAGAAGCA	24386338	-	IFNLR; LICR2; IFNLR1; CRF2/12;	NM_170743.2	GI:28416903	isoform 1 is encoded by transcript variant 1; interferon lambda; receptor 1; interleukin or cytokine receptor 2; interleukin 28 receptor A; class II cytokine receptor CRF2/12; go_component: membrane; go_component: integral to membrane; go_function: receptor activity; go_function: protein binding; go_function: hematopoietin/interferon-class (D200-domain) cytokine receptor activity	interleukin 28 receptor; alpha isoform 1	269	TRUE	1:24385968-24387340	-2.24659	-2.31802	-2.15869	-0.15933	0.144518	0.0354237	4.0797	6.53385e-05	0.0015757	-3.4537	-3.61618	-3.29123	-0.324952	0.000287576
cg25564800	KPNA1	3	123.717	3836	-	36.1	NCBI:RefSeq	CGCCTCGTGTCTAAAGGGCTCACATGCAGCATGAATGCAGGAAGCTTCTG	123716335	-	RCH2; SRP1; IPOA5; NPI-1;	NM_002264.1	GI:4504894	importin-alpha-S1; importin alpha 5; go_component: nucleus; go_component: cytoplasm; go_component: nuclear pore; go_function: binding; go_function: protein binding; go_function: protein transporter activity; go_function: nuclear localization sequence binding; go_process: protein import into nucleus; go_process: intracellular protein transport; go_process: regulation of DNA recombination; go_proce…	karyopherin alpha 1	489	TRUE	3:123715510-123717208	-1.73386	-1.81057	-1.63945	-0.171127	0.156484	0.0468422	3.34066	0.000998905	0.011366	-9.82467	-10.3338	-9.31553	-1.01829	0.052067
cg16396417	ZNF42	19	63.7771	7593	-	36.1	NCBI:RefSeq	TTGGACCCGTGTCTCTATGTTTGTTCACTTATTTTCACTGTCTCTCCTCG	63776754	-	MZF1; MZF-1; MZF1B; ZSCAN6;	NM_198055.1	GI:37622340	isoform 2 is encoded by transcript variant 2; go_component: nucleus; go_function: zinc ion binding; go_function: metal ion binding; go_function: protein binding; go_function: transcription factor activity; go_function: transcription factor activity; go_process: transcription; go_process: regulation of transcription; DNA-dependent; go_process: regulation of transcription; DNA-dependent	zinc finger protein 42 isoform 2	317	TRUE	19:63775603-63777250	-3.05878	-3.16792	-2.92446	-0.243457	0.211126	0.0535292	3.94413	0.000111118	0.00234474	-2.81262	-2.98472	-2.64053	-0.344181	0.000200971
cg18793806	ZNF514	2	95.1898	84874	-	36.1	NCBI:RefSeq	CCAGGAGAGCCTCCTGGAAATCCTCACTCAGCAGATCCAGGGTAGGAACG	95188990	-		NM_032788.1	GI:14249455	go_component: nucleus; go_function: DNA binding; go_function: zinc ion binding; go_function: metal ion binding; go_process: transcription; go_process: regulation of transcription; DNA-dependent	zinc finger protein 514	824	TRUE	2:95188460-95189846	-0.590732	-0.633738	-0.537801	-0.0959373	0.0998273	0.0361547	2.76111	0.00630206	0.0401085	0.708676	0.42378	0.993572	-0.569792	0.00737827
cg04058169	BUB3	10	124.903	9184	+	36.1	NCBI:RefSeq	CGCCCGTGAAGCTAACCAAAAGTTGATGTAGAGGAGGAAATATTTGCTCT	124903860	+	BUB3L; hBUB3;	NM_001007793.1	GI:56550080	isoform b is encoded by transcript variant 2; mitotic checkpoint component; budding uninhibited by benomyl; BUB3 (budding uninhibited by benzimidazoles 3; yeast) homolog; go_component: nucleus; go_component: kinetochore; go_process: mitosis; go_process: cell proliferation; go_process: mitotic spindle checkpoint	BUB3 budding uninhibited by benzimidazoles 3 isoform b	432	TRUE	10:124903424-124904818	1.32285	1.14959	1.53609	-0.386492	0.314746	0.0857464	3.67066	0.000311091	0.00497818	-0.185019	-0.471912	0.101874	-0.573786	0.0274994	cg04058169rs2304550	rs2304550	10	cg04058169	BUB3	124903428	124907228	10.0453	1.36e-15	TRUE	6.68062	2.44e-09	TRUE
cg02016419	TEKT3	17	15.186	64518	-	36.1	NCBI:RefSeq	TTAGGGTTCCAGGCAGCCCTGATGTGCCTTAGAATCGGCCAAGTTCTTCG	15185624	-		NM_031898.1	GI:13994249	testicular microtubules-related protein; go_component: microtubule; go_function: structural molecule activity; go_process: microtubule cytoskeleton organization and biogenesis	tektin 3	338	TRUE	17:15185000-15186014	-1.28505	-1.44997	-1.08207	-0.367907	0.354282	0.0540713	6.55213	4.79415e-10	1.35254e-07	-0.243041	-0.382312	-0.103771	-0.278542	0.0122537	cg02016419rs230982	rs230982	17	cg02016419	TEKT3	15185962	15197566	0.830151	0.411381	FALSE	6.09979	3.34e-08	TRUE
cg03764585	FMOD	1	201.587	2331	-	36.1	NCBI:RefSeq	TTCAGAGAGTGACCACGTCCCTCTGTCTGGCCTCCTTGGGTTGGAGAACG	201586912	-	SLRR2E;	NM_002023.3	GI:71040110	go_component: extracellular matrix (sensu Metazoa); go_component: extracellular matrix (sensu Metazoa); go_function: protein binding; go_process: transforming growth factor beta receptor complex assembly	fibromodulin precursor	66	FALSE		-0.37615	-0.195536	-0.598443	0.402907	-0.493318	0.0628406	-7.8503	2.55742e-13	2.1068e-10	-3.56559	-3.28261	-3.84856	0.565948	0.000335546	cg03764585rs10920616	rs10920616	1	cg03764585	FMOD	201586846	201584850	-3.5458	0.000697639	FALSE	-6.7939	1.41e-09	TRUE
[truncated: 709 more rows]

## Sheet: GO
Data S3b: Enriched GOs
[truncated: 339 more rows]
