# Supplementary material for: Ancestry Dependent DNA Methylation and Influence of Maternal Nutrition
Source: PLoS One. 2015 Mar 5;10(3):e0118466. doi: 10.1371/journal.pone.0118466 (PMC4350920; doi:10.1371/journal.pone.0118466)
Supplement: S4 Data — This provides module eigengene values, module characteristics, and association with maternal and child variables. (XLSX) [file pone.0118466.s004.xlsx]

## Sheet: CANDLEMethylationModules
Data S4a: Module characteristics of CANDLE methylome and module eigengene values for each CANDLE samples
Methylome data from 199 CANDLE cord blood samples
Total number of methylation sites = 20,595
WGCN network constructed using manual method
Soft power threshold = 6 (R2 for scale free network =0.850, max K = 295.00)
	These are correlations among methylation module eigengenes									Color codes for modules during network construction
ME_ID	Meth9	Meth2	Meth4	Meth6	Meth1	Meth8	Meth5	Meth3	Meth7	WGCNAassignedModuleColors	Module size	Cis-meQTLs
Meth9	1	0.33	0.22	0.23	0.075	-0.22	0.096	0.15	-0.024	cyan	160	1
Meth2	0.33	1	0.67	0.64	-0.44	-0.62	0.13	0.00032	0.036	greenyellow	2430	55
Meth4	0.22	0.67	1	0.75	-0.12	-0.017	-0.047	-0.15	-0.098	brown	2104	48
Meth6	0.23	0.64	0.75	1	-0.63	-0.4	-0.26	-0.44	-0.27	green	1895	39
Meth1	0.075	-0.44	-0.12	-0.63	1	0.75	0.23	0.49	0.3	black	7924	17
Meth8	-0.22	-0.62	-0.017	-0.4	0.75	1	0.04	0.16	0.12	purple	584	1
Meth5	0.096	0.13	-0.047	-0.26	0.23	0.04	1	0.36	0.26	yellow	1917	102
Meth3	0.15	0.00032	-0.15	-0.44	0.49	0.16	0.36	1	0.78	blue	2231	3
Meth7	-0.024	0.036	-0.098	-0.27	0.3	0.12	0.26	0.78	1	magenta	641	4
These are the module eigenegenes for the CANDLE samples
CANDLESampleID	Meth9	Meth2	Meth4	Meth6	Meth1	Meth8	Meth5	Meth3	Meth7	Meth0
1	-0.0484854	-0.116093	-0.196404	-0.0753228	-0.110223	-0.0482934	-0.0132644	-0.0432291	-0.0226478	-0.0803652
2	0.018112	-0.0877375	0.120573	0.115655	0.0456978	0.0738501	-0.0730134	-0.0708086	-0.0809669	-0.110298
3	0.0478585	0.0516949	0.0693825	0.0655884	-0.0453626	-0.0225158	-0.0215082	-0.0149025	0.00117023	0.0413942
4	-0.0685617	0.0314861	0.0346161	0.00556488	-0.0449054	0.0187712	0.0609565	0.0165932	0.0814793	-0.0844631
5	-0.0267502	0.0396521	-0.00429562	0.0357399	-0.0966216	-0.0355349	0.00565453	-0.020118	-0.00596402	-0.0101275
6	-0.0822409	0.00468132	-0.0712658	-0.166075	0.190395	-0.167222	0.0325122	0.131503	0.072116	0.0571132
7	0.101886	0.0709718	0.0851577	0.0744414	0.00104908	-0.0318953	-0.0132705	0.0524198	0.0373322	0.0571474
8	0.0950771	-0.0421362	0.0956096	0.107477	0.041774	0.0835584	-0.0493767	-0.0130762	0.0233388	0.0121472
9	-0.232299	0.0119448	-0.0965177	-0.117776	-0.00657631	-0.0873887	0.0260827	-0.0465237	-0.0500184	-0.105868
10	0.0372522	0.0194401	0.00683268	0.0531927	-0.0502075	-0.0293355	0.0490656	-0.00854144	0.0338908	-0.00330165
11	-0.0456325	-0.0232799	-0.00521541	-0.0412914	0.0252491	0.0452063	0.0984654	0.0162572	-0.00535133	-0.0306235
12	-0.0472292	0.0390428	0.0650595	0.0362444	-0.00664336	0.0231308	-0.0331583	0.00613408	-5.3172e-05	-0.0673808
13	0.123987	0.0891039	0.0834155	0.0287369	0.0543296	-0.0140679	0.071536	0.0304472	0.0594675	0.0379589
14	-0.00222457	-0.143365	-0.0210216	-0.134182	0.225	0.238229	0.0135438	0.172823	0.0657666	0.0932669
15	-0.0137998	-0.0553811	-0.0192778	0.0946958	-0.0540329	-0.0264331	-0.145083	-0.140934	-0.109154	-0.120981
16	-0.0652515	0.0218962	-0.0287649	-0.0168833	-0.0283655	-0.0576709	-0.0724339	-0.0370127	-0.0436153	-0.0543957
17	0.00627453	-0.0575255	0.0188632	-0.0544722	0.125452	0.135793	0.061261	0.0936576	0.0269293	-0.00120994
18	0.000540128	-0.00729175	-0.0651535	-0.0330582	0.0210887	-0.0190558	-0.0172452	0.0219352	0.0273626	-0.0141878
19	0.0509029	0.0710847	0.0307558	0.0639287	-0.0873641	-0.0726907	0.0253196	0.0453342	0.100529	0.0143206
20	0.0407555	0.0644398	0.0142805	0.0302962	-0.0581488	-0.064521	0.0245526	-0.0282354	-0.0373946	-0.0135145
21	-0.0287413	-0.07258	-0.0960075	-0.0253907	-0.0594065	-0.0228175	-0.0625289	-0.0617499	-0.0322199	-0.0421732
22	0.0208681	0.0642304	0.022307	0.0581418	-0.100395	-0.0950414	-0.022793	-0.0601333	-0.00470153	-0.0251636
23	0.0272503	0.0124806	0.0027557	-0.00190547	0.024692	0.00230953	0.023834	-0.0477954	-0.106367	0.0683927
24	-0.0482537	-0.0194373	-0.0336447	0.0148561	-0.0792746	-0.00779156	0.0589193	-0.0721495	-0.0716069	-0.053612
25	-0.00104657	0.0930397	0.0432548	0.046908	-0.0810714	-0.0778114	-0.0563172	-0.0639498	-0.0438566	-0.0141731
26	-0.22287	-0.198458	-0.0448832	-0.0565952	-0.0418268	0.178584	-0.102999	-0.105842	-0.126352	-0.0923853
27	-0.201845	-0.131466	-0.104237	-0.103475	0.0345345	0.083686	-0.102187	0.0234264	0.0655057	-0.0245429
28	0.13673	-0.0551762	-0.0459442	-0.0281678	0.0406202	-0.00422795	0.0181916	0.0981217	-0.0645288	0.0252697
29	-0.102292	0.00273126	0.0278596	-0.0198288	0.0894677	0.0729659	0.033763	-0.023192	-0.0316209	0.0457477
30	0.0372893	0.0625878	0.0713753	0.0284438	0.0191414	-0.00468232	-0.0153966	0.0744584	0.00628661	0.0211899
31	0.0829775	0.0395134	0.0832731	0.150377	-0.0846811	-0.0580975	-0.0257948	-0.0523169	-0.00704126	-0.0770799
32	0.00088669	0.052678	0.0193971	0.0438701	-0.0895859	-0.0659037	-0.0583435	-0.0394143	-0.00125435	0.0205648
33	-0.0505904	0.0388076	-0.0108945	0.0139038	-0.0711592	-0.0420493	-0.0173753	-0.0460421	-0.0275885	-0.0406758
34	0.179905	0.0594608	0.0527432	0.0512092	-0.0175082	-0.0539718	0.0391622	0.0135711	-0.083073	0.0644374
35	0.0254744	0.0560351	0.053665	0.0143666	0.0018067	-0.0253403	-0.0523035	0.117375	0.0528801	0.0227664
36	-0.0251602	0.0388362	0.0406339	0.0231632	-0.0597305	-0.0210948	0.0745853	-0.00651861	0.084136	-0.132224
37	0.00971924	0.0347386	0.0146329	0.0348095	-0.0282456	-0.0405112	0.100851	-0.0541857	-0.070085	-0.0104748
38	0.0748007	0.0384297	0.0102216	0.0442062	-0.0419546	-0.0595512	-0.00996425	-0.0750816	-0.103911	-0.0369613
39	0.183562	0.0963125	0.089973	0.0833016	-0.0361334	-0.0624708	-0.0840942	-0.139938	-0.194863	0.0366441
40	0.0608445	0.090346	0.0824644	0.0808352	-0.0649785	-0.0743379	-0.0506486	-0.159468	-0.140752	0.0335416
41	-0.0743545	-0.168366	-0.170103	-0.145703	0.0645394	0.041674	-0.0477543	-0.0467346	-0.0364465	0.00114518
42	0.0569592	-0.0381544	-0.0475154	-0.0188468	-0.013198	-0.0344123	0.00494713	-0.0644296	-0.109828	0.0147264
43	0.0201933	-9.20102e-05	0.0936038	0.0521574	0.0174938	0.0223172	-0.0303016	-0.0797539	-0.0740619	-0.0757081
44	-0.0286062	-0.0656262	0.0500138	0.119206	-0.0457261	0.0649917	-0.150752	-0.130432	0.0146921	-0.217456
45	0.0309736	0.00151613	0.00199255	-0.00241245	0.0138545	-0.00173884	-0.0545123	-0.0095497	-0.0232971	0.0759726
47	0.0555405	0.0135792	0.00275295	-0.00770723	0.0284896	-0.000568088	0.0513765	0.0011321	-0.0071316	0.0546385
48	0.0189358	0.000892542	-0.0306518	-0.00862535	-0.0253304	-0.0380232	-0.118804	0.159897	0.0917709	-0.0323768
49	-0.035699	0.00394053	-0.00304468	0.00869392	-0.0538661	-0.000714405	0.0970011	0.00740287	0.0746938	-0.0300566
50	-0.00283555	0.0645515	0.0367286	0.0309679	-0.0491625	-0.0554431	0.115109	0.139508	0.105236	0.0133791
51	-0.013182	-0.132791	-0.223799	-0.0905861	-0.0709672	-0.0837055	0.0278857	0.1076	0.0812944	-0.103669
52	-0.061884	0.0311073	0.172035	0.218746	-0.113618	0.0308412	-0.0658763	-0.129403	-0.0864688	-0.255911
53	-0.0192709	-0.136613	-0.132026	-0.132552	0.129054	0.11571	0.0693497	0.100477	0.0797948	0.0545763
54	0.0280971	0.0368236	-0.0160787	-0.0159248	-0.0256073	-0.0452665	-0.0143796	-0.0318277	0.0338101	0.00799182
55	0.0463724	-0.0356905	-0.0270846	-0.0821713	0.169005	0.111443	-0.0734006	0.153306	0.18712	0.177516
56	-0.00704168	0.0298246	0.0286177	-0.00798065	0.0213434	0.0294028	0.14536	0.0183844	0.025982	0.0382276
57	-0.109563	-0.0239775	0.0788209	0.0572972	-0.00611987	0.0698134	-0.00759561	0.00947611	-0.0139339	-0.0619037
58	0.0720149	0.0889671	0.0679312	0.0429736	-0.00943924	-0.0326379	0.080073	0.0544979	0.114663	0.112957
59	0.064652	-0.197111	-0.0150249	-0.122509	0.144386	0.188781	-0.032628	-0.0284956	-0.0714539	0.0277624
60	0.0681808	0.0141965	0.0852956	0.0811795	0.023587	0.0503466	0.00172077	-0.0703322	-0.0454602	0.00450664
61	0.0130778	-0.0182903	-0.0682274	-0.0761077	0.0741573	0.0224841	0.0549242	0.0959485	0.107863	0.052871
63	0.06222	-0.00905294	0.112086	0.130964	-0.0164441	0.066191	-0.0909804	-0.0876323	-0.0381865	-0.0960634
64	-0.02153	0.0290345	0.0231978	0.00819377	0.0108285	-0.00433148	-0.0136475	0.0520907	0.0315906	-0.010032
65	0.00704017	-0.0521688	-0.081385	-0.0366656	0.0144069	0.00390126	0.0959046	-0.0172677	-0.0379147	0.0174923
66	-0.0380719	-0.140147	-0.143668	-0.0389341	0.0302583	0.053157	-0.0792615	-0.0357536	0.00591995	-0.060735
67	0.0862477	0.0952548	0.0698635	0.0436457	0.0191853	-0.0442857	-0.0382519	0.0290802	0.0665206	0.0369788
68	-0.063826	-0.0738055	0.0495954	0.103708	-0.0411582	0.030999	-0.0868506	-0.0966019	-0.060103	-0.232237
69	0.0232806	-0.0197681	-0.0463683	-0.0152452	0.0286651	0.00316291	0.0900536	-0.00810244	-0.0223097	0.0147569
70	0.0343042	0.0130919	-0.10166	-0.0734582	-0.0414653	-0.111767	0.05603	0.124308	0.12222	-0.00764818
71	-0.052806	-0.0245756	-0.0669083	-0.0164326	-0.0297322	0.00548222	0.0702599	-0.0291635	0.0308822	-0.0340567
72	-0.0876631	0.0160969	0.0169722	0.0462314	-0.0429032	0.000448147	-0.0995995	-0.0365809	0.0203571	-0.108105
73	-0.00774698	0.0821283	0.0297015	0.0186569	-0.0288041	-0.0663725	-0.06667	0.00712671	0.0184979	-0.00926574
74	-0.0226299	0.13596	0.0638878	0.0835472	-0.0894276	-0.106197	0.0859175	-0.0739984	-0.0621967	-0.0325047
75	0.0697143	0.059122	0.00638126	-0.00386413	0.0387256	-0.0169056	-0.00507549	0.0160515	0.027432	0.140436
76	0.0233219	-0.067836	-0.115927	-0.0420804	0.0125565	-0.0187173	0.0239056	-0.0254542	-0.053289	0.00978886
77	-0.0480329	-0.0692566	-0.0743951	0.00613262	-0.0166125	0.0255173	-0.108693	-0.0370156	0.0286706	-0.0329338
78	0.0332326	-0.00937938	-0.115104	-0.069092	-0.0375466	-0.0872381	-0.0868481	-0.00888222	0.00799642	-0.0272118
79	-0.00462821	0.0569221	0.048102	0.0204878	-0.0169732	-0.0285488	-0.0221512	0.042465	0.0560125	0.000171929
80	0.0686007	0.0999168	0.0483269	0.0277322	-0.0248997	-0.0772976	0.030927	0.0521504	0.0319032	0.0645543
81	0.0124343	-0.182078	0.0423298	-0.12139	0.182949	0.166385	0.00325424	-0.00957288	-0.023571	0.0490729
82	0.0652411	0.0838588	0.0700041	0.0371949	-0.0269176	-0.040877	0.014618	0.0486332	0.0508095	0.038046
83	-0.0423347	0.01422	0.0255157	-0.0214371	-0.0105882	0.0228577	-0.0421019	0.0212934	0.0157664	0.0475308
84	-0.066832	0.0282505	0.054946	0.0849344	-0.0309306	0.0335018	-0.0435557	-0.106471	-0.083624	-0.0269381
85	0.0669323	-0.0564766	-0.156525	-0.119961	0.0195398	-0.0303774	0.0162933	0.143419	0.115916	0.0217408
86	-0.0124561	-0.0714755	-0.0691743	-0.079655	0.0861127	0.0673575	0.0864349	0.0225298	0.0359011	0.0461036
87	-0.0168989	-0.00589662	-0.0426566	-0.0274068	-0.00646965	-0.014408	-0.136722	0.00192524	0.0367445	0.0389135
88	0.0294404	0.0631	0.0664103	-0.0100486	0.109901	0.0657541	0.096269	0.148864	0.0166783	0.132585
89	0.0556548	0.0990406	0.0209285	-0.000493748	-0.00853006	-0.0823147	0.033351	0.0929275	0.121822	0.0398448
90	0.0462722	0.0957916	0.00905147	-0.000256765	-0.0134379	-0.0722028	0.208876	0.0976716	0.103993	0.0713529
91	-0.0783777	0.0236904	0.0168439	-0.00370325	-0.0214712	-0.00250961	-0.0452854	-0.00947959	-0.000853424	0.0159814
92	-0.0469778	0.0550996	0.0183369	0.00611141	-0.0449135	-0.0398466	0.0322477	-0.0389444	-0.0166547	-0.0138473
93	-0.0210382	-0.0537259	0.102446	0.112098	0.00522741	0.0592855	-0.108584	-0.0954903	-0.0332345	-0.116377
94	0.0011042	0.0496344	-0.00864449	0.00186463	-0.0467392	-0.0896526	-0.0606651	0.0135052	-0.000131297	-0.0466423
95	-0.0479929	-0.0209278	-0.0303509	0.00217918	-0.0195656	-0.00426194	-0.0547887	-0.0349164	-0.00757694	-0.0505523
96	-0.0294563	0.0650124	0.0822873	0.10083	-0.0280022	-0.0073466	0.0374327	-0.0373977	0.0378425	-0.030414
97	-0.0324547	0.0891258	0.0903964	0.093955	-0.0666194	-0.0520633	-0.0737844	-0.0414106	-0.0406906	-0.036589
98	0.204017	0.0340178	0.0632948	-0.00492763	0.139139	0.0727614	-0.0480408	0.000451137	-0.0668191	0.0962564
99	-0.0461155	-0.0296789	0.0126782	-0.00522475	0.016508	0.0672719	-0.0608119	0.0109137	-0.00977196	-0.00872705
100	-0.0782744	0.0128886	0.00246176	-0.0253132	0.00315595	0.0118243	0.0265883	0.010051	0.00263765	0.00481101
101	0.103265	0.135217	0.0686551	0.105476	-0.102169	-0.159553	0.032109	-0.0485486	-0.0419652	0.0924074
102	0.120102	-0.00986385	-0.0634467	-0.00123683	-0.0133701	-0.0653049	-0.0113857	-0.0689315	-0.114293	0.00770628
103	-0.0155204	-0.0685309	-0.0482831	-0.089147	0.0951864	0.0723471	0.000774868	0.153991	0.0382839	0.0710735
104	-0.035575	-0.0273968	-0.0353432	-0.0716515	0.0389256	0.0329898	0.0782154	0.0300173	0.0414458	0.0347697
105	-0.0492283	0.0273288	-0.00347512	0.0512155	-0.0712171	-0.048122	-0.0164831	-0.00880294	-0.00623705	-0.0759121
106	0.0406617	0.0313131	0.0286633	-0.00200758	0.030792	0.00935588	0.0920857	0.0275547	0.0851989	0.0488627
107	0.0342444	0.0159259	0.0345466	-0.0319576	0.0559511	0.0410755	0.0510767	-0.00271334	0.0341905	0.0722702
108	-0.105026	-0.00652267	0.0246973	-0.0686728	0.12953	0.114624	0.0145533	0.118804	0.0575696	0.0540437
109	-0.0203508	-0.12202	-0.132893	-0.0971491	0.00719674	0.002678	0.0939256	0.0703296	0.0847032	0.0177334
110	-0.0514842	0.0205267	0.032233	-0.0106412	-0.0224487	0.0218339	-0.0298258	-0.0897231	-0.0117608	-0.0269224
111	-0.110447	0.0387579	0.0462107	0.0417768	-0.103853	-0.0369389	-0.0589902	-0.117322	-0.152998	-0.100291
112	-0.0174187	-0.0519089	-0.0553135	-0.0704437	0.0448557	0.0388934	-0.0332842	0.0673208	0.0579727	-0.0198381
113	0.0430908	-0.0610921	-0.0512541	-0.0257552	0.0301842	0.0360646	-0.076045	0.0335938	0.0333013	0.0187649
114	-0.0632852	0.040328	0.0410743	0.0346504	-0.0814098	0.0161366	-0.00685233	-0.0250873	-0.0102714	-0.0179055
115	-0.0414375	-0.106547	-0.173866	-0.0783833	-0.0873796	0.0110768	-0.0978094	-0.0477934	-0.0298393	-0.151579
116	-0.0363647	-0.048739	0.0140792	-0.0275145	0.0726683	0.101055	-0.0322955	0.0404816	0.0146632	0.0407193
117	0.0925204	-0.00218867	0.00249781	0.0374482	-0.0102535	0.0216335	-0.0259808	0.0247762	0.0694419	0.00719044
119	-0.0598737	-0.000535272	0.00696656	-0.0521338	0.053933	-0.0382116	-0.0218476	0.00364424	-0.0107491	-0.0162132
120	0.132794	0.0780992	0.102401	0.101373	-0.0047486	0.00221833	0.0145894	0.0335736	0.0953415	0.0932929
121	0.00310101	0.0607044	0.0319026	0.0255344	-0.00791034	-0.0252529	-0.0136228	-0.0107354	0.00624965	0.0242948
122	-0.0635292	-0.0148874	-0.014661	-0.0191215	0.0077134	0.0187441	-0.0601231	0.000615231	0.00906698	0.0257782
123	-0.0748155	-0.0714941	-0.099556	-0.0245708	-0.102409	-0.0427339	-0.172466	-0.0783075	-0.0388704	-0.0968604
124	-0.0344535	0.0751995	0.0463384	0.0743839	-0.138058	-0.102925	-0.00961698	-0.096175	-0.0734564	-0.0299315
125	-0.0468248	-0.00591961	0.0162927	-0.0312616	0.0593624	0.0458537	0.113809	0.0375221	0.0689458	0.0171422
126	-0.124795	-0.142261	0.0862748	-0.00164164	0.0943932	0.172171	-0.00101035	-0.0130856	-0.0185693	-0.0484191
127	-0.00946572	0.0545074	0.00523547	0.0392346	-0.087713	-0.0696249	-0.103332	-0.0134852	0.0188443	-0.0124477
128	-0.0402111	0.0369646	0.0507388	0.100238	-0.0247201	-0.0143281	-0.0983019	-0.0729403	-0.0626634	-0.0755066
129	0.0589603	-0.0620032	-0.148363	-0.0808063	0.0118605	-0.0425873	0.0516366	0.0527219	0.0699828	0.0628495
130	0.0841617	0.077261	0.0351213	0.0233667	0.00145708	-0.045932	-0.0499073	-0.00882635	0.026716	0.0317901
131	0.0108463	0.0715771	0.0211187	-0.0181692	0.0310077	-0.0252768	0.0444081	-0.0123102	-0.0516824	0.0615974
132	-0.0731113	0.026329	0.0882875	0.115668	-0.0319628	0.0134888	-0.0402477	-0.0639885	-0.00767184	-0.0775036
133	-0.0430006	-0.0304008	-0.047141	0.0199033	-0.0476645	-0.0131201	0.0068845	-0.0300286	0.0116648	-0.0603797
134	-0.0348387	-0.0162093	-0.0363251	0.0279718	-0.0427236	-0.0137846	-0.0585037	-0.0406348	-0.0187554	-0.038189
135	0.115216	0.0895664	0.0803857	0.0847574	-0.0315101	-0.0678351	-0.100948	0.183201	0.0996774	0.0172085
136	-0.0452138	0.081223	0.221262	0.306309	-0.0702386	0.022673	-0.191874	-0.118685	0.0335863	-0.227546
137	0.0270869	-0.0665183	-0.0335771	0.0125396	0.0447435	0.0353364	-0.0511075	-0.0973509	-0.157624	0.022861
138	-0.0317709	-0.0665629	-0.0327336	-0.0726731	0.0946345	0.101786	-0.102775	0.10146	0.0990851	0.0342603
139	0.0513931	-0.00327194	-0.0500525	0.0122098	-0.0182406	-0.07443	0.0663881	0.17703	0.151904	0.0308414
140	-0.0536229	-0.0194598	-0.0575524	0.01651	-0.0947878	-0.0766486	0.0228128	-0.036005	0.0321599	-0.0721848
141	-0.00161675	-0.0813532	-0.133184	-0.00689783	-0.0935963	-0.0822568	-0.0731209	-0.0307332	0.0560335	-0.069275
142	-0.0382139	0.0604255	0.0498741	0.0726909	-0.122562	-0.0680244	0.0281933	-0.101015	-0.0476447	-0.0981092
143	0.150739	0.11432	0.0711006	0.143557	-0.140654	-0.154155	-0.112608	0.0177763	-0.0936344	-0.0636672
144	-0.0108725	-0.124811	-0.10422	-0.121647	0.128742	0.130444	-0.0111658	0.0289686	0.0301209	0.0543297
145	0.00556335	-0.0474216	-0.00183139	-0.0919143	0.152121	0.136858	0.0731472	0.0671328	0.090378	0.130352
146	-0.00514064	0.00149502	-0.00025429	-0.0385157	0.0711978	0.0532852	0.110532	0.100125	0.0853677	0.0847512
147	0.0108107	0.0758507	0.0515379	0.07524	-0.087534	-0.0737533	-0.0154679	-0.0921007	-0.0913633	-0.0106887
148	0.0172681	0.0587321	0.0308322	-0.0150514	0.0295999	-0.0113071	0.0478357	0.0816613	0.11048	0.0505391
149	-0.0566682	0.0149008	0.0349056	-0.0346081	0.0719465	0.0852954	0.131049	0.0399681	0.0459638	0.0563471
150	-0.0233217	-0.0111155	-0.0530983	0.0224893	-0.0898311	-0.0677024	-0.004563	-0.0638551	-0.0090827	-0.0164756
151	0.0101588	0.105677	0.0914164	0.0963764	-0.0758148	-0.0724475	0.0385846	0.0439864	0.0605893	0.0170474
152	0.00545746	0.0791911	0.0443465	0.0424779	-0.018099	-0.0488911	-0.0408776	-0.002044	0.0771876	-0.00682692
153	0.0172071	-0.0336593	-0.0161264	-0.037347	0.058201	0.0515362	-0.062103	-0.0167385	-0.0100949	0.0303886
154	0.0430233	-0.130114	-0.165746	-0.10206	0.0382882	0.0121943	-0.000494752	0.00303494	0.073361	0.0252048
155	-0.0519622	-0.0648448	-0.00466204	-0.0873656	0.129355	0.125743	-0.0552961	0.0158517	0.0112582	0.00385608
156	0.00947265	-0.175446	-0.0446806	-0.208294	0.265934	0.201	-0.0696977	0.0474137	0.0732498	0.122631
157	-0.054896	0.0506599	0.0280801	0.053202	-0.11615	-0.0676713	0.0128992	-0.065664	0.00354255	-0.145505
158	0.0549511	-0.0573246	-0.0807926	-0.0526791	-0.000853724	-0.0483759	0.0269194	-0.0339403	-0.0174534	0.0288886
159	0.0578038	0.112679	0.0935519	0.0929242	-0.0649187	-0.1033	-0.0200361	-0.0131215	-0.0206676	-0.0269476
160	-0.108177	-0.109197	-0.140936	-0.0689834	-0.109329	-0.110476	-0.0851881	-0.0769793	-0.13508	-0.119095
161	0.0376761	0.0765668	0.00771795	0.0178281	-0.0580075	-0.108554	-0.0452212	-0.0970234	-0.156459	0.0376836
162	0.150643	0.0884175	0.0721773	0.0283128	0.038111	-0.0314525	0.0521997	0.150225	0.079784	0.0934638
163	0.0156331	0.0797548	0.0751947	0.0699315	-0.047062	-0.0459189	-0.0182664	-0.0689092	-0.0796268	-0.0181929
164	-0.0102793	0.0232191	-0.01165	0.0353775	-0.0592134	-0.0550785	-0.0304609	-0.0493096	-0.0595082	-0.0367441
165	-0.0312249	-0.0869301	-0.113643	-0.0684324	-0.0321421	-0.0564338	0.0562493	-0.0227267	-0.0371749	-0.0314116
166	-0.071842	-0.1601	-0.103318	-0.241371	0.219777	0.251223	0.0580598	0.144622	0.104031	0.16571
167	0.00854518	-0.119812	-0.115366	-0.0659669	-0.00184614	0.0109088	-0.0330331	-0.0342217	-0.0596113	0.0193033
168	-0.0211373	-0.149205	0.0165282	0.0319753	0.0137681	0.12547	-0.072653	-0.210135	-0.251307	-0.185395
169	0.14922	0.0180208	-0.0182793	-0.0122365	0.0223129	-0.0270163	0.0233853	-0.0134311	-0.0520029	0.109003
170	0.0292425	0.0811777	0.0371201	0.034048	-0.04606	-0.0706653	0.0628496	-0.0229255	-0.0603411	0.0662887
171	-0.0396823	0.0087384	0.0316297	-0.0220564	0.0639804	0.0555978	0.0624667	0.0857066	0.0712738	0.0773875
173	-0.0341209	-0.115907	-0.0953697	-0.0978505	0.0228883	0.0578673	0.0562953	-0.023442	-0.10016	-0.0147259
174	0.0335934	-0.0907098	-0.130937	-0.0595951	-0.0524889	-0.0844305	-0.0213536	-0.0229867	-0.0654232	0.0546691
175	-0.0147498	0.0564355	0.0535169	0.037734	-0.0450736	-0.0272076	-0.00148777	-0.0640584	-0.119897	-0.0364164
176	0.000738923	0.0350833	0.00247869	0.000979653	-0.0255822	-0.037797	0.0906525	0.00940046	-0.0301703	0.00218252
177	-0.0595037	0.0269495	0.0376488	-0.0105266	-0.00550262	0.00798787	0.0513991	0.0234201	0.027843	-0.0206652
178	0.274938	0.0173936	0.0398763	0.0115154	0.106685	0.0394982	0.0709347	-0.0333668	-0.127121	0.151668
179	-0.0100496	0.00860454	-0.0128662	-0.0160997	0.0170798	0.017431	0.0429732	-0.00812851	-0.0248998	-0.00321686
180	-0.0533172	-0.0199138	-0.0603787	-0.0260675	-0.0468138	-0.0443739	0.00622174	-0.0100076	-0.0075434	0.0228186
181	0.100735	0.0880656	0.0723594	0.0537196	-0.0160031	-0.0269945	0.102881	0.0151835	0.0201192	0.0530881
182	-0.0470019	-0.0995599	-0.0889251	-0.105005	0.0819651	0.109166	0.184337	0.0398364	0.0275653	0.0219851
183	0.0234899	0.061956	0.0519384	0.0252573	-0.0157381	-0.018163	-0.0822721	0.0849443	0.115649	0.0082042
184	-0.0925483	-0.0101559	0.0153891	-0.0507709	0.0768288	0.109954	0.226854	-0.0138459	0.0446194	0.00364527
185	0.0219977	0.0114781	-0.0646247	-0.0155562	-0.0282734	-0.08344	0.0950637	0.0606738	0.00308474	0.0201983
186	-0.0690159	0.0326918	0.0384093	-0.0324528	0.0729549	0.0693221	0.0756632	0.0183843	0.0534439	0.0292472
187	0.00347567	0.0485529	0.0319845	0.0620383	-0.0898627	-0.0697527	-0.0694295	-0.0858154	-0.220912	-0.084162
188	-0.0359003	-0.0687332	-0.118686	-0.0672411	-0.00552986	0.0079855	0.0316807	0.0223602	0.0129869	0.0225183
189	0.0418482	0.0826175	0.0422577	0.0361761	-0.0372556	-0.0629653	0.0111584	-0.0196764	-0.010953	0.052838
190	-0.0379592	-0.0182236	0.00304402	-0.0499815	0.0411584	0.0435489	-0.0535657	0.0213559	0.0447898	-0.00428437
191	-0.014118	-0.0233553	-0.0160332	-0.0579452	0.0581594	0.0528948	0.0453047	0.0441038	0.0790567	0.0945933
192	0.245396	0.0324658	0.0296454	0.0181582	0.0668772	0.0156936	0.11101	-0.0395255	-0.10748	0.0698619
193	-0.00666547	-0.0162142	-0.00024919	-0.0570052	0.0783544	0.0691516	0.127404	0.00953458	-0.00411242	0.0994147
194	0.000495579	0.031839	0.0376268	-0.0259457	0.0373832	0.0226382	0.0147384	0.0710358	0.0616293	0.0567918
195	-0.0389801	0.0489684	0.0441039	-0.015414	0.0256164	0.0220803	0.0284414	0.0617587	0.0626814	0.0711328
196	-0.0485561	-0.0321179	0.00222885	-0.0380149	0.0361604	0.0548795	-0.131717	-0.0370652	-0.0621635	-0.00926526
197	-0.106803	0.0240269	0.0250292	0.0471073	-0.107584	-0.0380073	0.0401323	-0.109471	-0.0832627	-0.140867
198	-0.0906467	0.0744047	0.0701309	0.0392685	-0.0371728	-0.0275154	0.162001	0.0661351	0.00714219	0.0131401
199	-0.013501	0.0167962	0.0225042	-0.0313446	0.0466063	0.043751	0.067306	0.00388898	-0.0273901	0.0912042
200	0.00191688	-0.00754969	-0.0304268	-0.0259995	0.0119475	0.00738084	0.0282663	-0.0141104	-0.0216323	0.0585445
201	-0.0603481	0.0303331	0.00295932	-0.00659396	-0.0129683	-0.0337867	-0.0505299	0.0923825	0.0585759	-0.0212053
202	-0.0583212	-0.0959632	-0.0863995	-0.0980523	0.0600859	0.0745416	0.00771035	-0.0203905	-0.0591602	0.00600014
203	0.0641675	0.0453191	0.0793031	0.0203714	0.0600514	0.0457696	0.0722806	0.145845	0.077706	0.0759463

## Sheet: CANDLEMethylationModulesGOs
Data S4b: Module GO enrichment
DAVID Functional enrichment table report
Analysis in DAVID 6.7; Homo sapien genome as background (http://david.abcc.ncifcrf.gov/)
Category - (DAVID category, i.e. Interpro, sp_pir_keywords, ...)
Term - Gene set name
Count - number of genes associated with this gene set
Percentage - (gene associated with this gene set/total number of query genes)
PValue - modified Fisher Exact P-value
Genes - the list of genes from your query set that are annotated to this gene set.
List Total - number of genes in your query list mapped to any gene set in this ontology
Pop Hits - number of genes annotated to this gene set on the background list
Pop Total - number of genes on the background list mapped to any gene set in this ontology.
Benjamini - Corrected enrichment p
Enriched GO terms (Biological processes) in Meth1
Category	Term	Count	%	PValue	Genes	List Total	Pop Hits	Pop Total	Fold Enrichment	Bonferroni	Benjamini	FDR
GOTERM_BP_FAT	GO:0010605~negative regulation of macromolecule metabolic process	233	6.39934	3.08918e-11	MEF2C, EIF2C2, CDX2, EDN1, SNCA, ZNF639, REST, SHH, EPC1, ZGPAT, SIN3A, WWP1, FOXF2, RAB23, RARB, BCL7A, SUPT5H, EIF2B3, S100A1, TWIST1, ANAPC2, RCOR2, STRN3, ZHX1, GRIN2A, SERPING1, RAD9A, PTPRU, HES1, MSX1, MAD2L1, PIAS4, RPS14, BACE2, RPS13, EIF2C3, HUS1, IGF2BP1, IGF2BP3, BCL2L1, CALR, VPS72, HEXIM2, DRAP1, FBXO5, TCF4, NKX2-5, BMP4, DNMT3A, KLF12, SMAD6, KLF11, S100A11, NDFIP1, SKI, CDC20, S…	2906	734	13528	1.47774	1.55694e-07	1.55694e-07	5.88381e-08
GOTERM_BP_FAT	GO:0042981~regulation of apoptosis	251	6.89371	3.32731e-11	ITGB3BP, MEF2C, XRCC4, PTGS2, SNCB, SNCA, ITSN1, SHH, MAP3K5, BDNF, APP, MYD88, HTRA2, CD44, GRID2, PIK3CA, RPL11, RARB, DDAH2, MAP2K6, CUL1, DEPDC6, PIK3CG, BRAF, AARS, PIM1, GRIN2A, RAD9A, POLB, LIG4, BCL2L13, MAPK1, MSX1, NME1, TXNDC5, UNC13B, HOXA13, ERBB2, NFKBIA, PPT1, STK17A, BCL2L1, CALR, CD74, ADA, SLC11A2, KRAS, NKX2-5, HIP1, SPPL3, ABR, SPHK2, BECN1, SMAD6, SPHK1, GAS1, RPS6, ATM, BFAR…	2906	804	13528	1.4533	1.67696e-07	8.38481e-08	6.33737e-08
GOTERM_BP_FAT	GO:0010941~regulation of cell death	253	6.94864	5.15526e-11	ITGB3BP, MEF2C, XRCC4, PTGS2, SNCB, SNCA, ITSN1, SHH, MAP3K5, BDNF, APP, MYD88, HTRA2, CD44, GRID2, PIK3CA, RPL11, RARB, DDAH2, MAP2K6, CUL1, DEPDC6, PIK3CG, BRAF, AARS, PIM1, GRIN2A, RAD9A, POLB, LIG4, BCL2L13, MAPK1, MSX1, NME1, TXNDC5, UNC13B, HOXA13, ERBB2, NFKBIA, PPT1, STK17A, BCL2L1, CALR, CD74, ADA, SLC11A2, KRAS, NKX2-5, HIP1, SPPL3, BMP4, ABR, SPHK2, BECN1, SMAD6, SPHK1, GAS1, RPS6, ATM…	2906	815	13528	1.44511	2.59825e-07	8.66083e-08	9.81898e-08
GOTERM_BP_FAT	GO:0043067~regulation of programmed cell death	252	6.92118	5.88111e-11	ITGB3BP, MEF2C, XRCC4, PTGS2, SNCB, SNCA, ITSN1, SHH, MAP3K5, BDNF, APP, MYD88, HTRA2, CD44, GRID2, PIK3CA, RPL11, RARB, DDAH2, MAP2K6, CUL1, DEPDC6, PIK3CG, BRAF, AARS, PIM1, GRIN2A, RAD9A, POLB, LIG4, BCL2L13, MAPK1, MSX1, NME1, TXNDC5, UNC13B, HOXA13, ERBB2, NFKBIA, PPT1, STK17A, BCL2L1, CALR, CD74, ADA, SLC11A2, KRAS, NKX2-5, HIP1, SPPL3, ABR, SPHK2, BECN1, SMAD6, SPHK1, GAS1, RPS6, ATM, BFAR…	2906	812	13528	1.44472	2.96408e-07	7.41019e-08	1.12015e-07
GOTERM_BP_FAT	GO:0032774~RNA biosynthetic process	111	3.04861	3.4252e-10	CDX2, THRB, TBP, PTTG1, PRIM1, TAF5L, CDKN2A, TARDBP, GATA3, GATA4, SUPT5H, TBPL1, TAF6L, ADRM1, PRDM4, TCFL5, ABT1, SMARCA5, NFE2L1, NFE2L2, MYNN, XRN2, CCRN4L, ELL, SOX5, BMPR2, BTF3, SKIL, KLF5, MLL, TRIP4, EPAS1, TAF6, KLF11, ETS1, GTF2F1, SUPT16H, CCNT2, PPARA, COPS2, TAF1C, HLF, GTF3A, E2F3, TAF1A, ARID4A, COPS5, POU6F2, MKI67IP, PAX3, YBX1, YBX2, TMF1, FUBP1, MAX, MAZ, ASH2L, ANG, RTF1, MY…	2906	296	13528	1.7457	1.7263e-06	3.4526e-07	6.52382e-07
GOTERM_BP_FAT	GO:0045449~regulation of transcription	677	18.5938	5.14635e-10	MEF2C, MEF2B, MEF2A, XRCC6, HOXD12, ZNF639, ZNF250, RORA, REST, EPC1, APP, TAF5L, BRPF1, CDCA7, FLI1, FOXF1, FOXF2, ZNF396, ZNF395, ZNF394, TIGD6, CCNA2, TBPL1, CCAR1, PHOX2A, ZNF643, TIGD1, NDNL2, ZNF644, RCOR2, ZNF646, BARHL2, ZHX1, HMG20A, ZNF503, PTPRU, MED19, MAPK1, MSX1, SCYL1, NME1, RPS14, MED18, ZZZ3, FLII, TGIF2, MYBBP1A, ZNF613, ZNF517, ZNF132, ZNF77, NFKBIA, ZNF619, ZNF230, ZNF514, MYB…	2906	2601	13528	1.21168	2.59376e-06	4.32293e-07	9.80202e-07
GOTERM_BP_FAT	GO:0006351~transcription, DNA-dependent	109	2.99368	6.80498e-10	CDX2, THRB, TBP, PTTG1, TAF5L, CDKN2A, TARDBP, GATA3, GATA4, SUPT5H, TBPL1, TAF6L, ADRM1, PRDM4, TCFL5, ABT1, SMARCA5, NFE2L1, NFE2L2, MYNN, XRN2, CCRN4L, ELL, SOX5, BMPR2, BTF3, SKIL, KLF5, MLL, TRIP4, EPAS1, TAF6, KLF11, ETS1, GTF2F1, SUPT16H, CCNT2, PPARA, COPS2, TAF1C, HLF, GTF3A, E2F3, TAF1A, ARID4A, COPS5, POU6F2, MKI67IP, PAX3, YBX1, YBX2, TMF1, FUBP1, MAX, MAZ, ASH2L, ANG, RTF1, MYC, FOSL…	2906	292	13528	1.73773	3.4297e-06	4.89959e-07	1.29611e-06
GOTERM_BP_FAT	GO:0010604~positive regulation of macromolecule metabolic process	257	7.0585	1.59871e-09	MEF2C, CDX2, IL6ST, XRCC6, SNCA, RORA, SHH, EPC1, APP, BRPF1, FOXF1, FOXF2, H2AFX, RARB, SUPT5H, CCNA2, CUL1, SYK, ANAPC2, STRN3, BARHL2, TBR1, PPARGC1B, HES1, MAPK1, PIAS4, PIAS3, PIAS1, HOXA13, NFKBIA, CALR, PIN1, IL17F, FBXO5, FBXO4, TCF4, NKX2-5, KLF5, BMP4, BMP3, KLF6, UTF1, ESRRA, MLL, KLF12, MAML1, SMAD5, ESRRG, NDFIP1, CDC20, KLF15, SMAD1, CDC26, CDC27, DLX2, RNF6, ETS1, FOXI1, KLF4, ENY2…	2906	857	13528	1.39602	8.05745e-06	1.00719e-06	3.04499e-06
GOTERM_BP_FAT	GO:0006357~regulation of transcription from RNA polymerase II promoter	222	6.09723	4.48812e-09	MEF2C, CDX2, XRCC6, RORA, SHH, EPC1, APP, SIN3A, RARB, SUPT5H, S100A1, TWIST1, YY1, STRN3, BARHL2, TAF6L, TBR1, PPARGC1B, HES1, MED19, MSX1, PIAS4, RPS14, MED18, HOXA13, NFKBIA, CALR, VPS72, PFN1, HEXIM2, DRAP1, IL17F, TCF4, NKX2-5, BMP4, DNMT3A, KLF6, BMP3, ESRRA, TCF7, UTF1, MLL, KLF12, KLF9, MAML1, KLF11, SMAD5, SKI, SMAD1, UBP1, NKX6-1, DLX2, ETS1, KLF4, ZBTB32, PPARA, MITF, GLI1, GFI1B, ZNF1…	2906	727	13528	1.42153	2.26199e-05	2.51334e-06	8.54832e-06
GOTERM_BP_FAT	GO:0007049~cell cycle	232	6.37188	1.47487e-08	DBF4B, TUBB2A, AURKB, PTTG1, CD2AP, APP, MC1R, DDX12, MAP3K8, H2AFX, TLK2, SUPT5H, CCNA2, MAP2K6, CUL1, CCAR1, STAG1, ANAPC2, CGRRF1, LIG1, PIM1, TBRG4, UBR2, LIG4, DCTN3, VASH1, DCTN2, MAPK1, PPP1CA, MAD2L1, RCC2, MAPK6, SPAG5, C14ORF106, PRDM5, NEK4, MAD2L2, NUP43, NEK6, NEK2, RCC1, CALR, PIN1, FBXO5, NUDC, SSSCA1, MLL, TPD52L1, CDC20, GAS1, CDC26, RAD54L, GAS7, CDC27, ATM, DMTF1, UTP14C, CCNT2…	2906	776	13528	1.39176	7.43309e-05	7.43334e-06	2.80913e-05
GOTERM_BP_FAT	GO:0022402~cell cycle process	178	4.88877	1.58534e-08	CEP72, PRC1, TUBB2A, BTRC, AURKB, PTTG1, CD2AP, TGFB1, TGFB2, MLL5, APP, CDKN2A, CDKN2B, MC1R, CDKN2C, TARDBP, H2AFX, CCNA2, ASPM, CUL1, MAP2K6, RPS27A, STAG1, ANAPC2, CGRRF1, SGOL1, PIM1, TBRG4, UBR2, DCTN3, WEE1, VASH1, DCTN2, PSMA2, MAD2L1, RCC2, SPAG5, PSMA5, C14ORF106, PSMA3, AKAP8, NEK4, MAD2L2, NUP43, NEK6, PPP5C, BBS4, FZR1, NEK2, NEDD9, ANAPC11, CALR, SESN2, RCC1, SESN1, PSMB7, NIPBL, PS…	2906	565	13528	1.46659	7.98982e-05	7.26374e-06	3.01953e-05
GOTERM_BP_FAT	GO:0051726~regulation of cell cycle	115	3.15847	2.58114e-08	ILKAP, MAEA, PTGS2, EDN1, TGFB1, TGFB2, CSNK2A2, APP, CDKN2A, SFRS5, CDKN2B, CDKN2C, H2AFX, CCNA2, ANAPC2, CYP1A1, MADD, PIM1, RAD9A, JUNB, MAD2L1, PRDM4, MAD2L2, DCUN1D3, NEK6, SMARCA4, FZR1, HOXA13, NEK2, HUS1, SIPA1, BOP1, TRRAP, RCC1, CALR, CDC37, PIN1, OVOL2, HEXIM2, C12ORF11, NPM1, FBXO6, FAM5C, FBXO5, BMP4, FAM5B, TAF6, SMAD6, SPHK1, NEUROG1, BRIP1, GAS1, BRCA1, ATM, OBFC2B, CDKN1C, PLK4, …	2906	331	13528	1.61736	0.000130081	1.08407e-05	4.91617e-05
GOTERM_BP_FAT	GO:0006366~transcription from RNA polymerase II promoter	87	2.38945	5.15382e-08	CCNT2, HLF, TAF1C, PPARA, COPS2, E2F3, CDX2, TAF1A, COPS5, ARID4A, POU6F2, TBP, PAX3, PTTG1, YBX1, YBX2, TMF1, FUBP1, MAX, TAF5L, MAZ, ASH2L, TARDBP, GATA3, GATA4, SUPT5H, MYC, FOSL1, TBPL1, SNAPC3, CDK9, CDK7, MSC, MBD1, GTF2B, TAF11, ADRM1, MED4, TAF13, PRDM4, TCFL5, NRL, ABT1, NCOA6, NFE2L1, NFE2L2, SUPT3H, POLR2G, POLR2F, NMI, CCRN4L, ELL, SOX5, BMPR2, NFIX, NR3C1, NFYA, POLR2C, POLR2B, ERCC6…	2906	234	13528	1.73078	0.000259719	1.99808e-05	9.81625e-05
GOTERM_BP_FAT	GO:0006350~transcription	546	14.9959	5.89998e-08	MEF2C, MEF2B, MEF2A, HOXD12, ZNF639, ZNF250, RORA, REST, EPC1, BRPF1, TAF5L, CDCA7, FLI1, FOXF1, FOXF2, ZNF396, ZNF395, ZNF394, TBPL1, CCAR1, PHOX2A, ZNF643, ZNF644, RCOR2, BARHL2, ZHX1, HMG20A, ZNF503, MED19, MSX1, C1ORF83, SCYL1, NME1, MED18, ZZZ3, FLII, TGIF2, MYBBP1A, ZNF613, ZNF517, ZNF132, ZNF77, ZNF619, ZNF230, MYBL2, ZNF514, DIDO1, ZNF615, ZNF512, VPS72, ZNF227, HEXIM2, ZNF224, CASZ1, TCF…	2906	2101	13528	1.20977	0.000297315	2.12397e-05	0.000112374
GOTERM_BP_FAT	GO:0009719~response to endogenous stimulus	133	3.65284	9.06593e-08	SLC6A1, PDGFB, STAR, PTGS2, PTGS1, ADCY6, LHCGR, PDE3B, RPS6KB1, TGFB1, SHH, TGFB2, SLC2A8, PRKAR2B, EIF4EBP1, PRKAR2A, GOT1, GATA3, RARA, LOX, PRKACB, GNG3, GNG4, EIF2B2, CCNA2, EIF2B3, MB, SOCS2, STRN3, BAIAP2, SOCS1, AARS, GRIN2A, FBP1, PTPRU, PTPRN, PPARGC1B, JUNB, MAPK1, GRB10, EP300, PIAS3, SLC25A36, WFDC1, RBP4, CAV1, HMGB2, ERBB2, ALDOC, HMGCS1, ABCA2, BCL2L1, ASL, SRF, TIMP3, KRAS, IDH1,…	2906	405	13528	1.52874	0.000456819	3.04611e-05	0.000172674
GOTERM_BP_FAT	GO:0051252~regulation of RNA metabolic process	477	13.1008	1.10397e-07	MEF2C, MEF2B, MEF2A, XRCC6, ZNF639, HOXD12, ZNF250, REST, RORA, EPC1, APP, FLI1, FOXF1, FOXF2, ZNF396, ZNF395, ZNF394, TBPL1, PHOX2A, ZNF643, NDNL2, BARHL2, ZHX1, HMG20A, MED19, MSX1, NME1, RPS14, MED18, RPS13, TGIF2, MYBBP1A, ZNF613, ZNF517, ZNF132, ZNF77, NFKBIA, ZNF619, ZNF230, ZNF514, ZNF615, VPS72, PFN1, ZNF227, HEXIM2, ZNF224, IL17F, TCF4, ZNF70, DNMT3A, TCF7, ESRRA, UTF1, KLF12, PAIP1, KLF…	2906	1813	13528	1.22478	0.000556248	3.47746e-05	0.000210269
GOTERM_BP_FAT	GO:0006355~regulation of transcription, DNA-dependent	467	12.8261	1.31104e-07	MEF2C, MEF2B, MEF2A, XRCC6, ZNF639, HOXD12, ZNF250, REST, RORA, EPC1, APP, FLI1, FOXF1, FOXF2, ZNF396, ZNF395, ZNF394, TBPL1, PHOX2A, ZNF643, NDNL2, ZHX1, BARHL2, HMG20A, MED19, MSX1, NME1, RPS14, MED18, TGIF2, MYBBP1A, ZNF613, ZNF517, ZNF132, ZNF77, NFKBIA, ZNF619, ZNF230, ZNF514, ZNF615, VPS72, PFN1, ZNF227, HEXIM2, ZNF224, IL17F, TCF4, ZNF70, DNMT3A, TCF7, ESRRA, UTF1, KLF12, KLF11, ESRRG, KLF…	2906	1773	13528	1.22616	0.000660548	3.88678e-05	0.000249708
GOTERM_BP_FAT	GO:0010033~response to organic substance	213	5.85004	1.69335e-07	EIF2C2, STAR, PTGS2, IL6ST, SNCA, ADCY6, PTGS1, LHCGR, GRIN3A, XRCC1, SHH, B2M, GOT1, MYD88, CD44, CHRNA7, RARA, GNG3, GNG4, DDAH2, EIF2B2, SUPT5H, EIF2B3, CCNA2, CYP1A1, STRN3, AARS, GRIN2A, PTPRU, PTPRN, PPARGC1B, MAPK1, GRB10, MSX1, NME1, PIAS3, WFDC1, RBP4, CYP1B1, ERBB2, PFKFB2, ALDOC, HMGCS1, NFKBIA, BCL2L1, ASL, KRAS, IDH1, NKX2-5, NUDC, BMP4, TGFBR2, GGH, SMAD1, GART, EPS8, CHRNB1, PPARA,…	2906	721	13528	1.37525	0.000853083	4.74126e-05	0.000322524
GOTERM_BP_FAT	GO:0000278~mitotic cell cycle	122	3.35073	2.54086e-07	PRC1, TUBB2A, BTRC, AURKB, PTTG1, CD2AP, APP, CDKN2A, MC1R, CDKN2B, CDKN2C, TARDBP, CCNA2, ASPM, CUL1, RPS27A, STAG1, ANAPC2, SGOL1, PIM1, TBRG4, DCTN3, WEE1, DCTN2, PSMA2, MAD2L1, RCC2, SPAG5, PSMA5, C14ORF106, PRDM5, PSMA3, AKAP8, NEK4, MAD2L2, NUP43, NEK6, PPP5C, FZR1, NEK2, NEDD9, ANAPC11, RCC1, PSMB7, NIPBL, PSMB6, KATNA1, FBXO5, CLASP2, NUDC, SSSCA1, CDC20, TPD52L1, SUGT1, CDC26, CDC27, PSM…	2906	370	13528	1.53496	0.00127978	6.73975e-05	0.000483946
GOTERM_BP_FAT	GO:0045935~positive regulation of nucleobase, nucleoside, nucleotide and nucleic acid metabolic process	187	5.13595	3.62736e-07	MEF2C, CDX2, PDGFB, THRB, XRCC6, TBP, TNFSF12, RORA, SHH, TGFB1, EPC1, GATA2, BRPF1, MLL5, APP, PROP1, GATA6, SMARCD3, FOXF1, FOXF2, SMARCD1, GATA4, H2AFX, PDGFC, RARB, SUPT5H, MYST1, MLL4, CCNA2, RPS27A, MYO6, STRN3, MTA2, ARID1A, SIX4, TRERF1, TBR1, PPARGC1B, JUNB, TNKS2, HES1, HOXD9, HHEX, MAPK1, EP300, PIAS1, NFE2L2, SMARCA4, CAMTA2, HMGB2, HOXA13, SOX2, SOX5, NFKBIA, CALR, SRF, HOXA1, MEIS2,…	2906	624	13528	1.39507	0.00182652	9.14053e-05	0.000690885
GOTERM_BP_FAT	GO:0032269~negative regulation of cellular protein metabolic process	69	1.89508	3.89477e-07	EIF2C2, IDE, SNCA, SHH, TGFB1, YBX2, MEN1, EIF4EBP3, EIF4EBP1, CDKN2A, ANG, TIA1, PSMD1, RAB23, PSMD2, PSMD3, EIF2B3, PSMD7, RPS27A, PSMD8, PSMD9, PPP2R1A, ANAPC2, PRG3, SOCS1, PRKCG, SERPING1, CDK5, PSMA2, MAD2L1, PSMA5, PSMA3, UBB, EIF2C3, SRP9, PSMB10, FZR1, CAV1, IGF2BP1, IGF2BP3, ANAPC11, CALR, TIMP3, PSMB7, PSMB6, SET, PPP2CA, ITGAV, FBXO5, TINF2, BUB3, NF2, SMAD6, YWHAB, CDC20, CDC26, CDC2…	2906	180	13528	1.78449	0.00196104	9.34702e-05	0.000741817
GOTERM_BP_FAT	GO:0051248~negative regulation of protein metabolic process	71	1.95001	3.96175e-07	EIF2C2, IDE, SNCA, SHH, TGFB1, YBX2, EIF4EBP3, MEN1, EIF4EBP1, CDKN2A, ANG, TIA1, PSMD1, RAB23, PSMD2, PSMD3, EIF2B3, PSMD7, RPS27A, PSMD8, PSMD9, PPP2R1A, ANAPC2, PRG3, SOCS1, GRIN2A, PRKCG, SERPING1, CDK5, PSMA2, MAD2L1, PSMA5, PSMA3, UBB, MDM4, EIF2C3, SRP9, PSMB10, FZR1, CAV1, IGF2BP1, IGF2BP3, ANAPC11, CALR, TIMP3, PSMB7, PSMB6, SET, PPP2CA, ITGAV, FBXO5, TINF2, BUB3, NF2, SMAD6, YWHAB, CDC2…	2906	187	13528	1.76748	0.00199473	9.0756e-05	0.000754574
GOTERM_BP_FAT	GO:0045934~negative regulation of nucleobase, nucleoside, nucleotide and nucleic acid metabolic process	158	4.33947	4.65474e-07	MEF2C, CDX2, THRB, RBM15B, EDN1, ZNF639, REST, MAF1, TGFB1, EPC1, ZGPAT, HOXC8, SIN3A, PROP1, WWP1, FOXF2, RARB, SUPT5H, BCL7A, MYST1, S100A1, TWIST1, RCOR2, STRN3, MTA2, ZHX1, HDAC10, VAX2, RAD9A, PTPRU, NR0B2, HES1, HHEX, MSX1, SMARCE1, PIAS4, RPS14, RPS13, ATPIF1, SMARCA4, PALM, HMGB2, HUS1, SOX2, CALR, VPS72, NR2C1, VDR, MEIS2, HEXIM2, OVOL2, DRAP1, NPM1, OVOL1, SKIL, TCF4, NKX2-5, DNMT3A, KL…	2906	512	13528	1.43656	0.00234324	0.000101994	0.000886564
GOTERM_BP_FAT	GO:0009725~response to hormone stimulus	120	3.2958	5.25471e-07	SLC6A1, STAR, PTGS2, PDGFB, PTGS1, ADCY6, LHCGR, PDE3B, RPS6KB1, TGFB1, SHH, TGFB2, SLC2A8, PRKAR2B, EIF4EBP1, PRKAR2A, GOT1, GATA3, RARA, LOX, PRKACB, GNG3, GNG4, EIF2B2, CCNA2, EIF2B3, MB, SOCS2, BAIAP2, STRN3, SOCS1, FBP1, PTPRU, PTPRN, PPARGC1B, JUNB, MAPK1, GRB10, EP300, PIAS3, SLC25A36, WFDC1, RBP4, CAV1, HMGB2, ERBB2, ABCA2, BCL2L1, ASL, SRF, TIMP3, KRAS, IDH1, NKX2-5, NUDC, BMP4, PTPN2, T…	2906	367	13528	1.52213	0.00264487	0.000110343	0.00100084
GOTERM_BP_FAT	GO:0051173~positive regulation of nitrogen compound metabolic process	191	5.24581	5.8709e-07	MEF2C, CDX2, PDGFB, THRB, XRCC6, EDN1, TBP, TNFSF12, RORA, SHH, TGFB1, EPC1, GATA2, BRPF1, MLL5, APP, PROP1, GATA6, SMARCD3, FOXF1, FOXF2, SMARCD1, GATA4, H2AFX, PDGFC, RARB, SUPT5H, MYST1, MLL4, CCNA2, RPS27A, MYO6, STRN3, MTA2, ARID1A, SIX4, TRERF1, TBR1, PPARGC1B, JUNB, TNKS2, HES1, HOXD9, HHEX, MAPK1, EP300, PIAS1, NFE2L2, SMARCA4, CAMTA2, HMGB2, HOXA13, SOX2, SOX5, NFKBIA, CALR, SRF, HOXA1, …	2906	644	13528	1.38066	0.00295456	0.00011835	0.0011182
GOTERM_BP_FAT	GO:0051172~negative regulation of nitrogen compound metabolic process	159	4.36693	6.98191e-07	MEF2C, CDX2, THRB, RBM15B, EDN1, ZNF639, REST, MAF1, TGFB1, EPC1, ZGPAT, HOXC8, SIN3A, PROP1, WWP1, FOXF2, RARB, SUPT5H, BCL7A, MYST1, S100A1, TWIST1, RCOR2, STRN3, MTA2, ZHX1, HDAC10, VAX2, RAD9A, PTPRU, NR0B2, HES1, HHEX, MSX1, SMARCE1, PIAS4, RPS14, RPS13, ATPIF1, SMARCA4, PALM, HMGB2, CAV1, HUS1, SOX2, CALR, VPS72, NR2C1, VDR, MEIS2, HEXIM2, OVOL2, DRAP1, NPM1, OVOL1, SKIL, TCF4, NKX2-5, DNMT…	2906	519	13528	1.42616	0.0035127	0.000135333	0.0013298
GOTERM_BP_FAT	GO:0030182~neuron differentiation	138	3.79017	7.44606e-07	TUBB2A, EFNA1, STRN, GRIN3A, RORA, SHH, TGFB2, GATA2, BDNF, APP, HOXC8, MCOLN3, CD44, MC1R, HTRA2, PITX3, SS18L1, RPS27A, PHOX2A, RET, LBX1, MYO6, EFNB3, STMN3, BAIAP2, BARHL2, EMX2, VAX2, TBR1, FARP2, HES1, HOXD9, SLITRK1, SLITRK3, NDEL1, RND1, SLITRK5, IGSF9, C1ORF187, BBS4, LPPR4, ERBB2, SOX2, SOX5, PPT1, EPHB3, SRF, EPHB2, ALCAM, HOXA1, LAMB2, MTCH1, NUMB, NGRN, B3GNT1, LHX5, BMP4, SPTBN4, NE…	2906	438	13528	1.46671	0.00374578	0.000138984	0.00141821
GOTERM_BP_FAT	GO:0045941~positive regulation of transcription	170	4.66905	8.7013e-07	MEF2C, CDX2, THRB, XRCC6, TBP, RORA, TGFB1, SHH, EPC1, GATA2, BRPF1, MLL5, APP, PROP1, GATA6, SMARCD3, FOXF1, FOXF2, SMARCD1, GATA4, RARB, SUPT5H, MYST1, MLL4, CCNA2, RPS27A, MYO6, STRN3, MTA2, ARID1A, SIX4, TBR1, TRERF1, PPARGC1B, JUNB, HES1, HOXD9, HHEX, MAPK1, EP300, PIAS1, NFE2L2, SMARCA4, CAMTA2, HMGB2, HOXA13, SOX2, SOX5, NFKBIA, SRF, HOXA1, MEIS2, OVOL2, IL17F, TCF4, RUNX1, NKX2-5, KLF5, B…	2906	564	13528	1.40316	0.00437586	0.000156611	0.00165728
GOTERM_BP_FAT	GO:0031396~regulation of protein ubiquitination	44	1.20846	1.02431e-06	PSMB10, FZR1, BTRC, ANAPC11, STUB1, PIN1, PSMB7, PSMB6, CDKN2A, PSMD1, PSMD2, PSMD3, FBXO5, FBXO4, PSMD7, PSMD8, BUB3, RPS27A, CUL1, PSMD9, ANAPC2, NDFIP1, PRKCG, CDC20, CDC26, CDC27, CDK5, BRCA1, PSMB8, PSMB9, UBE2N, PSMA2, PSMD14, PSMC6, MAD2L1, PSMC4, PSMD12, PSMA5, PSMC3, PSMA3, PSMC1, RNF139, UBB, VPS28	2906	100	13528	2.04829	0.00514922	0.000178002	0.00195094
GOTERM_BP_FAT	GO:0009792~embryonic development ending in birth or egg hatching	110	3.02115	1.10899e-06	XRCC4, CDX2, EDN1, GNA12, DLK1, SHH, GATA2, GATA6, COL4A3BP, FOXF1, GATA4, HOXC5, TWIST1, CYP1A1, LIG4, SIX4, JUNB, HOXD9, HES1, MSX1, EP300, NDEL1, HOXD4, SMARCA4, RBP4, BBS4, SYVN1, ELL, PTK7, KEAP1, BCL2L1, SRF, ADA, PFN1, OVOL2, SLC30A1, BTF3, HOXA9, TRAF6, NKX2-5, BMP4, EPAS1, TGFBR2, EN1, CELSR1, GAS1, BRCA1, ATM, HOXB4, DLX2, NMT1, PLK4, TULP3, SFRP1, HOXB7, PSMC4, SFRP2, PSMC3, HOXB5, CHR…	2906	334	13528	1.53315	0.00557374	0.000186294	0.00211223
GOTERM_BP_FAT	GO:0010557~positive regulation of macromolecule biosynthetic process	192	5.27328	1.17134e-06	MEF2C, CDX2, PDGFB, THRB, XRCC6, TBP, RORA, TLR6, SHH, TGFB1, TGFB2, EPC1, GATA2, BRPF1, MLL5, APP, PROP1, GATA6, SMARCD3, FOXF1, FOXF2, SMARCD1, GATA4, PDGFC, RARB, SUPT5H, MYST1, MLL4, CCNA2, EBI3, SAMD4A, RPS27A, SYK, MYO6, STRN3, MTA2, BARHL2, ARID1A, SIX4, TRERF1, TBR1, PPARGC1B, JUNB, TNKS2, HES1, HOXD9, HHEX, MAPK1, EP300, PIAS1, NFE2L2, SMARCA4, CAMTA2, HMGB2, HOXA13, SOX2, SOX5, NFKBIA, …	2906	654	13528	1.36666	0.00588617	0.000190419	0.00223098
GOTERM_BP_FAT	GO:0006412~translation	109	2.99368	1.25367e-06	RPL17, EIF2C2, MRPL42, MRPS33, RPL19, RPL13, IARS2, MRPS30, MRPL36, RPL26L1, FAU, MRPL37, RPL11, RPL12, EIF2B2, MRPL33, EIF2B3, RPS27A, MRPL35, RPL35A, MRPL52, CARS, AARS, SECISBP2, EEF2, RSL1D1, RPS19, RPS16, MRPS18A, RARS, RPS14, RPS13, RPS10, MRPL47, RPS11, MRPL45, MRPS14, FARS2, MRPS10, WARS2, IGF2BP3, PTRH2, MTIF3, QRSL1, RPS27, RPL7, RPL6, RPL8, HARS2, RPS20, RPS23, RPS24, RPSA, PAIP1, GARS…	2906	331	13528	1.53298	0.00629861	0.000197434	0.00238779
GOTERM_BP_FAT	GO:0043009~chordate embryonic development	109	2.99368	1.25367e-06	XRCC4, CDX2, EDN1, GNA12, DLK1, SHH, GATA2, GATA6, COL4A3BP, FOXF1, GATA4, HOXC5, TWIST1, LIG4, SIX4, JUNB, HOXD9, HES1, MSX1, NDEL1, EP300, HOXD4, SMARCA4, RBP4, BBS4, SYVN1, ELL, PTK7, KEAP1, BCL2L1, SRF, ADA, PFN1, OVOL2, SLC30A1, BTF3, HOXA9, TRAF6, NKX2-5, BMP4, EPAS1, TGFBR2, EN1, CELSR1, GAS1, BRCA1, ATM, HOXB4, DLX2, NMT1, PLK4, TULP3, SFRP1, HOXB7, PSMC4, SFRP2, PSMC3, HOXB5, CHRD, MYH10…	2906	331	13528	1.53298	0.00629861	0.000197434	0.00238779
GOTERM_BP_FAT	GO:0043066~negative regulation of apoptosis	115	3.15847	1.32578e-06	MEF2C, XRCC4, MAEA, SNCB, SNCA, ITSN1, SHH, BDNF, MYD88, PROP1, TPT1, PIK3CA, DDAH2, API5, RPS27A, PIK3CG, SOCS2, BRAF, AARS, PIM1, POLB, LIG4, HBXIP, MSX1, NME1, TXNDC5, RIPK2, HSPB1, TNFAIP3, SYVN1, PAFAH2, ERBB2, NFKBIA, PPT1, BCL2L1, ADA, CD74, KRAS, NPM1, TRAF6, NKX2-5, SPHK2, BECN1, SMAD6, SPHK1, ATM, BFAR, GCM2, CDKN1A, RNF7, SFRP1, HSPD1, IKBKB, CACNA1A, MITF, BNIP3, PRDX3, BAG4, PAK7, GP…	2906	354	13528	1.51228	0.00665967	0.000202463	0.00252512
GOTERM_BP_FAT	GO:0043069~negative regulation of programmed cell death	116	3.18594	1.59598e-06	MEF2C, XRCC4, MAEA, SNCB, SNCA, ITSN1, SHH, BDNF, MYD88, PROP1, TPT1, PIK3CA, DDAH2, API5, RPS27A, PIK3CG, SOCS2, BRAF, AARS, PIM1, POLB, LIG4, HBXIP, MSX1, NME1, TXNDC5, RIPK2, HSPB1, TNFAIP3, SYVN1, PAFAH2, ERBB2, NFKBIA, PPT1, BCL2L1, ADA, CD74, KRAS, NPM1, TRAF6, NKX2-5, SPHK2, BECN1, SMAD6, SPHK1, ATM, BFAR, GCM2, CDKN1A, RNF7, SFRP1, PLCG2, HSPD1, IKBKB, CACNA1A, MITF, BNIP3, PRDX3, BAG4, P…	2906	359	13528	1.50419	0.00801147	0.000236552	0.00303974
GOTERM_BP_FAT	GO:0010628~positive regulation of gene expression	173	4.75144	1.62198e-06	MEF2C, CDX2, THRB, XRCC6, TBP, RORA, TGFB1, SHH, EPC1, GATA2, BRPF1, MLL5, APP, PROP1, GATA6, SMARCD3, FOXF1, FOXF2, SMARCD1, GATA4, RARB, SUPT5H, MYST1, MLL4, CCNA2, RPS27A, MYO6, STRN3, MTA2, ARID1A, SIX4, TBR1, TRERF1, PPARGC1B, JUNB, HES1, HOXD9, HHEX, MAPK1, EP300, PIAS1, NFE2L2, SMARCA4, CAMTA2, HMGB2, HOXA13, SOX2, SOX5, NFKBIA, SRF, HOXA1, MEIS2, OVOL2, IL17F, TCF4, RUNX1, NKX2-5, KLF5, B…	2906	581	13528	1.38614	0.00814145	0.000233538	0.00308926
GOTERM_BP_FAT	GO:0060548~negative regulation of cell death	116	3.18594	1.85778e-06	MEF2C, XRCC4, MAEA, SNCB, SNCA, ITSN1, SHH, BDNF, MYD88, PROP1, TPT1, PIK3CA, DDAH2, API5, RPS27A, PIK3CG, SOCS2, BRAF, AARS, PIM1, POLB, LIG4, HBXIP, MSX1, NME1, TXNDC5, RIPK2, HSPB1, TNFAIP3, SYVN1, PAFAH2, ERBB2, NFKBIA, PPT1, BCL2L1, ADA, CD74, KRAS, NPM1, TRAF6, NKX2-5, SPHK2, BECN1, SMAD6, SPHK1, ATM, BFAR, GCM2, CDKN1A, RNF7, SFRP1, PLCG2, HSPD1, IKBKB, CACNA1A, MITF, BNIP3, PRDX3, BAG4, P…	2906	360	13528	1.50001	0.00931953	0.000260056	0.00353837
GOTERM_BP_FAT	GO:0031397~negative regulation of protein ubiquitination	35	0.961274	2.24386e-06	PSMB10, FZR1, ANAPC11, PSMB7, PSMB6, CDKN2A, PSMD1, PSMD2, PSMD3, FBXO5, PSMD7, BUB3, RPS27A, PSMD8, PSMD9, ANAPC2, PRKCG, CDC20, CDC26, CDC27, CDK5, PSMB8, PSMB9, PSMA2, PSMD14, PSMC6, MAD2L1, PSMC4, PSMD12, PSMA5, PSMC3, PSMA3, PSMC1, UBB, VPS28	2906	74	13528	2.20178	0.0112453	0.000305603	0.00427368
GOTERM_BP_FAT	GO:0031400~negative regulation of protein modification process	49	1.34578	2.32133e-06	SNCA, TGFB1, MEN1, CDKN2A, PSMD1, PSMD2, PSMD3, PSMD7, PSMD8, RPS27A, PSMD9, ANAPC2, PPP2R1A, SOCS1, PRKCG, CDK5, PSMA2, MAD2L1, PSMA5, PSMA3, UBB, PSMB10, FZR1, CAV1, ANAPC11, PSMB7, SET, PSMB6, PPP2CA, FBXO5, TINF2, BUB3, NF2, SMAD6, YWHAB, CDC20, CDC26, CDC27, PSMB8, PSMB9, PSMC6, PSMD14, PSMD12, PSMC4, PSMC3, BAX, PSMC1, VPS28, IGFBP3	2906	119	13528	1.91685	0.0116314	0.000307835	0.00442124
GOTERM_BP_FAT	GO:0006461~protein complex assembly	153	4.20214	2.37513e-06	OCLN, SLC6A1, TUBB2A, CAPZA2, IDE, TBP, CD2AP, SLC7A6, TGFB1, TAPBP, MC1R, SH3BGR, PDGFC, TBPL1, SYK, CUTA, KCND2, SCUBE3, BRAF, MAGI1, SCUBE1, PRKAB1, DPAGT1, FADD, TAF6L, SPAG9, ADRM1, C14ORF104, VAMP8, SMARCA5, ATPIF1, UNC13B, PPP5C, CAV1, ALDOC, DAG1, CALR, CD74, PXN, LLGL1, CSE1L, NPM1, TUBE1, FBXO5, SKIL, OLFM1, HIP1, SRP54, MLL, TAF6, EPRS, SKI, SMAD1, GAS7, LIN7A, PPIH, GTF2F1, TUBD1, QPR…	2906	505	13528	1.41039	0.0118993	0.000306894	0.00452371
GOTERM_BP_FAT	GO:0070271~protein complex biogenesis	153	4.20214	2.37513e-06	OCLN, SLC6A1, TUBB2A, CAPZA2, IDE, TBP, CD2AP, SLC7A6, TGFB1, TAPBP, MC1R, SH3BGR, PDGFC, TBPL1, SYK, CUTA, KCND2, SCUBE3, BRAF, MAGI1, SCUBE1, PRKAB1, DPAGT1, FADD, TAF6L, SPAG9, ADRM1, C14ORF104, VAMP8, SMARCA5, ATPIF1, UNC13B, PPP5C, CAV1, ALDOC, DAG1, CALR, CD74, PXN, LLGL1, CSE1L, NPM1, TUBE1, FBXO5, SKIL, OLFM1, HIP1, SRP54, MLL, TAF6, EPRS, SKI, SMAD1, GAS7, LIN7A, PPIH, GTF2F1, TUBD1, QPR…	2906	505	13528	1.41039	0.0118993	0.000306894	0.00452371
GOTERM_BP_FAT	GO:0042127~regulation of cell proliferation	223	6.12469	2.61543e-06	RARRES3, XRCC4, CDX2, PTGS2, IL6ST, FGFRL1, EDN1, PTGS1, STRN, SHH, SSR1, BDNF, MYD88, CDCA7, CHRNA7, RARB, CCNA2, CUL1, SYK, CGRRF1, TBRG4, LIG4, PTPRU, VASH1, HES1, VEGFB, MAPK1, SSTR2, MSX1, NME1, WFDC1, ADAMTS1, ATPIF1, RBP4, GNAI2, ERBB2, NFKBIA, BCL2L1, CALR, ADA, PIN1, KRAS, AGGF1, RAC2, LHX5, NKX2-5, KLF5, BMP4, ESRRA, MLL, SPHK2, BECN1, KLF11, TGFBR2, SPHK1, S100A11, NDFIP1, SKI, SMAD1, …	2906	787	13528	1.31907	0.0130953	0.00032949	0.00498137
GOTERM_BP_FAT	GO:0051340~regulation of ligase activity	37	1.0162	3.00343e-06	PSMB10, XRCC4, FZR1, BTRC, ANAPC11, PIN1, PSMB7, PSMB6, CDKN2A, PSMD1, PSMD2, PSMD3, FBXO5, PSMD7, PSMD8, BUB3, RPS27A, CUL1, PSMD9, ANAPC2, CDC20, CDC26, CDC27, PSMB8, PSMB9, UBE2N, PSMA2, PSMD14, PSMC6, MAD2L1, PSMD12, PSMC4, PSMA5, PSMC3, PSMA3, PSMC1, UBB	2906	81	13528	2.12645	0.0150233	0.000369135	0.00572035
GOTERM_BP_FAT	GO:0051438~regulation of ubiquitin-protein ligase activity	36	0.988739	3.14015e-06	PSMB10, FZR1, BTRC, ANAPC11, PIN1, PSMB7, PSMB6, CDKN2A, PSMD1, PSMD2, PSMD3, FBXO5, PSMD7, PSMD8, BUB3, RPS27A, CUL1, PSMD9, ANAPC2, CDC20, CDC26, CDC27, PSMB8, PSMB9, UBE2N, PSMA2, PSMD14, PSMC6, MAD2L1, PSMD12, PSMC4, PSMA5, PSMC3, PSMA3, PSMC1, UBB	2906	78	13528	2.14855	0.0157018	0.000376747	0.00598073
GOTERM_BP_FAT	GO:0043065~positive regulation of apoptosis	133	3.65284	3.54409e-06	ITGB3BP, PTGS2, MMP9, RBM5, TNFSF12, ITSN1, TGFB1, CRADD, TGFB2, MAP3K5, APP, PTGIS, CDKN2A, TIAM2, CD44, HTRA2, CDKN2C, TIA1, RPL11, RARB, DAP, MX1, CUL1, MAP2K6, RPS27A, NET1, NUDT2, GRIN2A, FADD, RAD9A, BCL2L13, STK4, STK3, MAPK1, RIPK3, RIPK2, DCUN1D3, UNC13B, HOXA13, BCL2L1, RRM2B, STK17A, TIMP3, VDR, MTCH1, TRAF6, TRAF3, HIP1, ABR, RPS6, C14ORF153, BRCA1, ATM, TRADD, TXNDC12, EPHA7, CDKN1A,…	2906	430	13528	1.43986	0.0177037	0.000415315	0.00675006
GOTERM_BP_FAT	GO:0031328~positive regulation of cellular biosynthetic process	197	5.4106	3.78451e-06	MEF2C, CDX2, XRCC6, EDN1, LHCGR, RORA, SHH, EPC1, APP, BRPF1, FOXF1, FOXF2, RARB, SUPT5H, CCNA2, SYK, STRN3, BARHL2, TBR1, PPARGC1B, HES1, MAPK1, PIAS1, HOXA13, NFKBIA, CALR, IL17F, TCF4, NKX2-5, BMP4, KLF5, KLF6, BMP3, ESRRA, UTF1, MLL, KLF12, MAML1, SMAD5, ESRRG, KLF15, SMAD1, DLX2, RNF6, ETS1, FOXI1, KLF4, ENY2, PPARA, MITF, GLI3, GLI1, ZNF148, SERTAD3, USP16, MYC, SERTAD1, IHH, SERTAD2, ATF7I…	2906	685	13528	1.33879	0.0188932	0.000433406	0.00720794
GOTERM_BP_FAT	GO:0032268~regulation of cellular protein metabolic process	144	3.95496	4.08158e-06	EIF2C2, PDGFB, IL6ST, BTRC, SNCA, IDE, EDN1, TLR6, TGFB1, SHH, EIF4EBP3, PRKAR2B, MAP3K6, EIF4EBP1, MAP3K5, APP, PRKAR2A, CDKN2A, RBM8A, TIA1, HRSP12, RAB23, PDGFC, PDGFD, EIF2B2, EIF2B3, CUL1, SAMD4A, RPS27A, SYK, ANAPC2, BARHL2, SOCS1, SERPING1, PSMA2, MAPK1, MAP4K5, EP300, MAD2L1, PIAS4, PSMA5, PIAS3, PSMA3, RNF139, HSPB1, PIAS1, EIF2C3, FZR1, CAV1, BMPR2, MAP4K1, NFKBIA, IGF2BP1, ANAPC11, IGF…	2906	474	13528	1.41424	0.0203611	0.000457034	0.00777372
GOTERM_BP_FAT	GO:0010942~positive regulation of cell death	134	3.68031	4.10169e-06	ITGB3BP, PTGS2, MMP9, RBM5, TNFSF12, ITSN1, TGFB1, CRADD, TGFB2, MAP3K5, APP, PTGIS, CDKN2A, TIAM2, CD44, HTRA2, CDKN2C, TIA1, RPL11, RARB, DAP, MX1, CUL1, MAP2K6, RPS27A, NET1, NUDT2, GRIN2A, FADD, RAD9A, BCL2L13, STK4, STK3, MAPK1, RIPK3, RIPK2, DCUN1D3, UNC13B, HOXA13, BCL2L1, RRM2B, STK17A, TIMP3, VDR, MTCH1, TRAF6, TRAF3, HIP1, BMP4, ABR, RPS6, C14ORF153, BRCA1, ATM, TRADD, TXNDC12, EPHA7, C…	2906	435	13528	1.43401	0.0204603	0.000449302	0.00781201
GOTERM_BP_FAT	GO:0051351~positive regulation of ligase activity	34	0.933809	4.89071e-06	PSMB10, XRCC4, FZR1, BTRC, ANAPC11, PIN1, PSMB7, PSMB6, PSMD1, PSMD2, PSMD3, FBXO5, PSMD7, PSMD8, RPS27A, CUL1, PSMD9, ANAPC2, CDC20, CDC26, CDC27, PSMB8, PSMB9, UBE2N, PSMA2, PSMD14, PSMC6, PSMD12, PSMC4, PSMA5, PSMC3, PSMA3, PSMC1, UBB	2906	73	13528	2.16817	0.0243479	0.000524314	0.0093147
GOTERM_BP_FAT	GO:0010558~negative regulation of macromolecule biosynthetic process	162	4.44933	5.04342e-06	MEF2C, EIF2C2, CDX2, THRB, RBM15B, EDN1, ZNF639, REST, MAF1, TGFB1, EIF4EBP3, EPC1, ZGPAT, EIF4EBP1, HOXC8, SIN3A, PROP1, TIA1, WWP1, FOXF2, RARB, SUPT5H, BCL7A, MYST1, EIF2B3, S100A1, TWIST1, RCOR2, STRN3, MTA2, ZHX1, HDAC10, VAX2, RAD9A, PTPRU, NR0B2, HES1, HHEX, MSX1, SMARCE1, PIAS4, BACE2, RPS14, EIF2C3, SMARCA4, HMGB2, HUS1, SOX2, IGF2BP1, IGF2BP3, CALR, VPS72, NR2C1, VDR, MEIS2, HEXIM2, OVO…	2906	547	13528	1.37869	0.0250986	0.000529421	0.00960554
GOTERM_BP_FAT	GO:0051443~positive regulation of ubiquitin-protein ligase activity	33	0.906344	5.05947e-06	PSMB10, FZR1, BTRC, ANAPC11, PIN1, PSMB7, PSMB6, PSMD1, PSMD2, PSMD3, FBXO5, PSMD7, RPS27A, CUL1, PSMD8, PSMD9, ANAPC2, CDC20, CDC26, CDC27, PSMB8, PSMB9, UBE2N, PSMA2, PSMD14, PSMC6, PSMD12, PSMC4, PSMA5, PSMC3, PSMA3, PSMC1, UBB	2906	70	13528	2.19459	0.0251774	0.000520268	0.00963609
GOTERM_BP_FAT	GO:0051352~negative regulation of ligase activity	32	0.878879	5.1946e-06	PSMB10, FZR1, ANAPC11, PSMB7, PSMB6, CDKN2A, PSMD1, PSMD2, PSMD3, FBXO5, PSMD7, BUB3, RPS27A, PSMD8, PSMD9, ANAPC2, CDC20, CDC26, CDC27, PSMB8, PSMB9, PSMA2, PSMD14, PSMC6, MAD2L1, PSMD12, PSMC4, PSMA5, PSMC3, PSMA3, PSMC1, UBB	2906	67	13528	2.22338	0.0258411	0.00052348	0.00989346
GOTERM_BP_FAT	GO:0051444~negative regulation of ubiquitin-protein ligase activity	32	0.878879	5.1946e-06	PSMB10, FZR1, ANAPC11, PSMB7, PSMB6, CDKN2A, PSMD1, PSMD2, PSMD3, FBXO5, PSMD7, BUB3, RPS27A, PSMD8, PSMD9, ANAPC2, CDC20, CDC26, CDC27, PSMB8, PSMB9, PSMA2, PSMD14, PSMC6, MAD2L1, PSMD12, PSMC4, PSMA5, PSMC3, PSMA3, PSMC1, UBB	2906	67	13528	2.22338	0.0258411	0.00052348	0.00989346
GOTERM_BP_FAT	GO:0043068~positive regulation of programmed cell death	133	3.65284	5.26025e-06	ITGB3BP, PTGS2, MMP9, RBM5, TNFSF12, ITSN1, TGFB1, CRADD, TGFB2, MAP3K5, APP, PTGIS, CDKN2A, TIAM2, CD44, HTRA2, CDKN2C, TIA1, RPL11, RARB, DAP, MX1, CUL1, MAP2K6, RPS27A, NET1, NUDT2, GRIN2A, FADD, RAD9A, BCL2L13, STK4, STK3, MAPK1, RIPK3, RIPK2, DCUN1D3, UNC13B, HOXA13, BCL2L1, RRM2B, STK17A, TIMP3, VDR, MTCH1, TRAF6, TRAF3, HIP1, ABR, RPS6, C14ORF153, BRCA1, ATM, TRADD, TXNDC12, EPHA7, CDKN1A,…	2906	433	13528	1.42989	0.0261634	0.000519703	0.0100185
GOTERM_BP_FAT	GO:0031399~regulation of protein modification process	97	2.6641	5.45222e-06	PDGFB, IL6ST, BTRC, SNCA, EDN1, TLR6, TGFB1, MAP3K6, PRKAR2B, PRKAR2A, MAP3K5, CDKN2A, PDGFC, PDGFD, RPS27A, CUL1, SYK, ANAPC2, SOCS1, PSMA2, MAP4K5, MAD2L1, PIAS4, PIAS3, PSMA5, PSMA3, RNF139, PIAS1, CAV1, FZR1, BMPR2, MAP4K1, ANAPC11, PIN1, PSMB7, PSMB6, FBXO5, FBXO4, BMP4, MLL, SMAD6, NDFIP1, CDC20, CDC26, CDC27, PSMB8, BRCA1, PSMB9, PSMC6, PSMC4, PSMC3, PRKAR1B, PSMC1, PRKAR1A, PRKAG2, DAXX, …	2906	295	13528	1.53069	0.0271052	0.000528308	0.0103841
GOTERM_BP_FAT	GO:0031327~negative regulation of cellular biosynthetic process	165	4.53172	6.28734e-06	MEF2C, EIF2C2, CDX2, PDGFB, THRB, RBM15B, EDN1, ZNF639, REST, MAF1, TGFB1, EIF4EBP3, EPC1, ZGPAT, EIF4EBP1, HOXC8, SIN3A, PROP1, TIA1, WWP1, FOXF2, RARB, SUPT5H, BCL7A, MYST1, EIF2B3, S100A1, TWIST1, RCOR2, STRN3, MTA2, ZHX1, HDAC10, VAX2, RAD9A, PTPRU, NR0B2, HES1, HHEX, MSX1, SMARCE1, PIAS4, BACE2, RPS14, EIF2C3, SMARCA4, PALM, HMGB2, CAV1, HUS1, SOX2, IGF2BP1, IGF2BP3, CALR, VPS72, NR2C1, VDR,…	2906	561	13528	1.36918	0.0311915	0.000597714	0.0119745
GOTERM_BP_FAT	GO:0009891~positive regulation of biosynthetic process	198	5.43807	6.89191e-06	MEF2C, CDX2, XRCC6, EDN1, LHCGR, RORA, SHH, EPC1, APP, BRPF1, FOXF1, FOXF2, RARB, SUPT5H, CCNA2, SYK, STRN3, BARHL2, TBR1, PPARGC1B, HES1, MAPK1, PIAS1, HOXA13, NFKBIA, CALR, IL17F, TCF4, NKX2-5, BMP4, KLF5, KLF6, BMP3, ESRRA, UTF1, MLL, KLF12, MAML1, SMAD5, ESRRG, KLF15, SMAD1, DLX2, RNF6, ETS1, FOXI1, KLF4, ENY2, PPARA, MITF, GLI3, GLI1, ZNF148, SERTAD3, USP16, MYC, SERTAD1, IHH, SERTAD2, ATF7I…	2906	695	13528	1.32623	0.034139	0.000643041	0.0131259
GOTERM_BP_FAT	GO:0051439~regulation of ubiquitin-protein ligase activity during mitotic cell cycle	33	0.906344	7.32773e-06	PSMB10, FZR1, BTRC, ANAPC11, PSMB7, PSMB6, PSMD1, PSMD2, PSMD3, FBXO5, PSMD7, BUB3, RPS27A, CUL1, PSMD8, PSMD9, ANAPC2, CDC20, CDC26, CDC27, PSMB8, PSMB9, PSMA2, PSMD14, PSMC6, MAD2L1, PSMD12, PSMC4, PSMA5, PSMC3, PSMA3, PSMC1, UBB	2906	71	13528	2.16368	0.0362582	0.000671264	0.0139559
GOTERM_BP_FAT	GO:0051253~negative regulation of RNA metabolic process	114	3.13101	7.60588e-06	MEF2C, CDX2, ZNF639, REST, MAF1, ZGPAT, EPC1, HOXC8, PROP1, SIN3A, FOXF2, RARB, SUPT5H, S100A1, TWIST1, MTA2, STRN3, ZHX1, HDAC10, VAX2, NR0B2, HES1, HHEX, MSX1, SMARCE1, PIAS4, RPS14, RPS13, SMARCA4, SOX2, CALR, VPS72, NR2C1, VDR, MEIS2, OVOL2, HEXIM2, DRAP1, NPM1, OVOL1, SKIL, TCF4, NKX2-5, DNMT3A, KLF12, RFX5, KLF11, SKI, FOXP1, CDKN1C, HOXB4, DLX2, HDAC9, DNAJB6, KLF4, E2F1, PPARA, ZBTB32, AR…	2906	362	13528	1.466	0.0376083	0.000684297	0.0144856
GOTERM_BP_FAT	GO:0051436~negative regulation of ubiquitin-protein ligase activity during mitotic cell cycle	31	0.851414	7.81565e-06	PSMB10, FZR1, ANAPC11, PSMB7, PSMB6, PSMD1, PSMD2, PSMD3, FBXO5, PSMD7, BUB3, RPS27A, PSMD8, PSMD9, ANAPC2, CDC20, CDC26, CDC27, PSMB8, PSMB9, PSMA2, PSMD14, PSMC6, MAD2L1, PSMD12, PSMC4, PSMA5, PSMC3, PSMC1, PSMA3, UBB	2906	65	13528	2.22017	0.0386253	0.000690832	0.0148851
GOTERM_BP_FAT	GO:0006793~phosphorus metabolic process	265	7.27822	8.13223e-06	PDP2, EFNA1, SNCA, AURKB, MAP3K6, MAP3K5, APP, PSKH1, COL4A3BP, MAP3K8, CLK4, PIK3C3, PIK3CA, CHRNA7, GNG3, TLK2, MAP2K6, SYK, PTPRJ, PIK3CG, TYRO3, BCR, BRAF, PIK3CD, PIM1, WNK1, PTPRU, MARK3, PTPRN, PTPRO, MAPK1, PNKP, SPAG9, PPP1CA, SCYL1, MAPK6, NME1, ROR1, NEK4, NEK6, NEK7, LPPR4, GNAI2, NEK2, ENPP2, ERBB2, HUS1, STK17A, DUSP11, EPHB3, EPHB4, ATP6V0B, CD74, EPHB2, VRK2, DULLARD, TAOK3, MGC42…	2906	973	13528	1.26786	0.040158	0.000706416	0.015488
GOTERM_BP_FAT	GO:0006796~phosphate metabolic process	265	7.27822	8.13223e-06	PDP2, EFNA1, SNCA, AURKB, MAP3K6, MAP3K5, APP, PSKH1, COL4A3BP, MAP3K8, CLK4, PIK3C3, PIK3CA, CHRNA7, GNG3, TLK2, MAP2K6, SYK, PTPRJ, PIK3CG, TYRO3, BCR, BRAF, PIK3CD, PIM1, WNK1, PTPRU, MARK3, PTPRN, PTPRO, MAPK1, PNKP, SPAG9, PPP1CA, SCYL1, MAPK6, NME1, ROR1, NEK4, NEK6, NEK7, LPPR4, GNAI2, NEK2, ENPP2, ERBB2, HUS1, STK17A, DUSP11, EPHB3, EPHB4, ATP6V0B, CD74, EPHB2, VRK2, DULLARD, TAOK3, MGC42…	2906	973	13528	1.26786	0.040158	0.000706416	0.015488
GOTERM_BP_FAT	GO:0031398~positive regulation of protein ubiquitination	37	1.0162	8.31291e-06	PSMB10, FZR1, BTRC, ANAPC11, STUB1, PIN1, PSMB7, PSMB6, PSMD1, PSMD2, PSMD3, FBXO5, FBXO4, PSMD7, PSMD8, RPS27A, CUL1, PSMD9, ANAPC2, NDFIP1, CDC20, CDC26, CDC27, BRCA1, PSMB8, PSMB9, UBE2N, PSMA2, PSMD14, PSMC6, PSMD12, PSMC4, PSMA5, PSMC3, PSMA3, PSMC1, UBB	2906	84	13528	2.0505	0.0410317	0.000709871	0.015832
GOTERM_BP_FAT	GO:0010629~negative regulation of gene expression	150	4.11975	8.70692e-06	MEF2C, EIF2C2, CDX2, THRB, RBM15B, ZNF639, REST, MAF1, TGFB1, EPC1, ZGPAT, HOXC8, PROP1, SIN3A, WWP1, SND1, FOXF2, RARB, SUPT5H, BCL7A, MYST1, S100A1, TWIST1, RCOR2, STRN3, MTA2, ZHX1, HDAC10, VAX2, PTPRU, NR0B2, HES1, HHEX, MSX1, SMARCE1, PIAS4, RPS14, EIF2C3, SMARCA4, HMGB2, SOX2, BCL2L1, CALR, VPS72, NR2C1, VDR, MEIS2, HEXIM2, OVOL2, DRAP1, OVOL1, SKIL, TCF4, NKX2-5, BMP4, DNMT3A, KLF12, RFX5,…	2906	504	13528	1.38548	0.0429342	0.000731117	0.0165824
GOTERM_BP_FAT	GO:0045893~positive regulation of transcription, DNA-dependent	143	3.92749	9.54628e-06	MEF2C, CDX2, THRB, XRCC6, RORA, TGFB1, SHH, EPC1, GATA2, MLL5, APP, PROP1, GATA6, SMARCD3, FOXF1, FOXF2, SMARCD1, GATA4, RARB, SUPT5H, MLL4, MYO6, STRN3, MTA2, ARID1A, SIX4, TBR1, TRERF1, PPARGC1B, JUNB, HOXD9, HES1, HHEX, EP300, NFE2L2, PIAS1, SMARCA4, CAMTA2, HMGB2, HOXA13, SOX2, SOX5, NFKBIA, SRF, HOXA1, MEIS2, OVOL2, IL17F, TCF4, RUNX1, NKX2-5, BMP4, KLF6, BMP3, UTF1, ESRRA, MLL, EPAS1, KLF12…	2906	477	13528	1.39558	0.0469744	0.000788434	0.0181808
GOTERM_BP_FAT	GO:0051254~positive regulation of RNA metabolic process	144	3.95496	9.57827e-06	MEF2C, CDX2, THRB, XRCC6, RORA, TGFB1, SHH, EPC1, GATA2, MLL5, APP, PROP1, GATA6, SMARCD3, FOXF1, FOXF2, SMARCD1, GATA4, RARB, SUPT5H, MLL4, MYO6, STRN3, MTA2, ARID1A, SIX4, TBR1, TRERF1, PPARGC1B, JUNB, HOXD9, HES1, HHEX, EP300, NFE2L2, PIAS1, SMARCA4, CAMTA2, HMGB2, HOXA13, SOX2, SOX5, NFKBIA, SRF, HOXA1, MEIS2, OVOL2, IL17F, TCF4, RUNX1, NKX2-5, BMP4, KLF6, BMP3, UTF1, ESRRA, MLL, EPAS1, KLF12…	2906	481	13528	1.39366	0.047128	0.000778322	0.0182417
GOTERM_BP_FAT	GO:0045892~negative regulation of transcription, DNA-dependent	112	3.07608	9.6689e-06	MEF2C, CDX2, ZNF639, REST, MAF1, ZGPAT, EPC1, HOXC8, PROP1, SIN3A, FOXF2, RARB, SUPT5H, S100A1, TWIST1, MTA2, STRN3, ZHX1, HDAC10, VAX2, NR0B2, HES1, HHEX, MSX1, SMARCE1, PIAS4, RPS14, SMARCA4, SOX2, CALR, VPS72, NR2C1, VDR, MEIS2, OVOL2, HEXIM2, DRAP1, OVOL1, SKIL, TCF4, NKX2-5, DNMT3A, KLF12, RFX5, KLF11, SKI, FOXP1, CDKN1C, HOXB4, DLX2, HDAC9, DNAJB6, KLF4, E2F1, PPARA, ZBTB32, ARID4A, NR6A1, …	2906	356	13528	1.46456	0.0475631	0.000773216	0.0184143
GOTERM_BP_FAT	GO:0009890~negative regulation of biosynthetic process	167	4.58665	9.84699e-06	MEF2C, EIF2C2, CDX2, PDGFB, THRB, RBM15B, EDN1, ZNF639, REST, MAF1, TGFB1, EIF4EBP3, EPC1, ZGPAT, EIF4EBP1, HOXC8, SIN3A, PROP1, TIA1, WWP1, FOXF2, RARB, BCL7A, SUPT5H, MYST1, EIF2B3, S100A1, TWIST1, RCOR2, STRN3, MTA2, ZHX1, HDAC10, VAX2, RAD9A, PTPRU, NR0B2, HES1, HHEX, MSX1, SMARCE1, PIAS4, BACE2, RPS14, EIF2C3, SMARCA4, PALM, HMGB2, CAV1, HUS1, SOX2, IGF2BP1, IGF2BP3, CALR, VPS72, NR2C1, VDR,…	2906	573	13528	1.35675	0.0484177	0.000775153	0.0187534
GOTERM_BP_FAT	GO:0006414~translational elongation	42	1.15353	1.02876e-05	TUFM, RPL17, RPL19, RPL13, RPL27A, VARS, RPS3, RPS27, RPL32, RPL7, RPL6, RPL34, RPL8, EEF2K, RPL26L1, FAU, RPL11, RPL12, RPS20, RPS27A, RPS23, RPS24, RPL35A, RPSA, RPL26, RPL27, EEF2, RPL23A, RPS6, RPS5, RPS8, RPL29, RPS19, RPS16, RPL22, RPS14, RPS13, EEF1G, RPL37A, RPS10, RPS11, UBB	2906	101	13528	1.93582	0.0505286	0.000797373	0.0195926
GOTERM_BP_FAT	GO:0048545~response to steroid hormone stimulus	68	1.86762	1.14367e-05	SLC6A1, LDLR, PTGS2, PDGFB, IGFBP7, LEPR, PTGS1, RPS6KB1, SHH, TGFB1, TGFB2, CASP6, FOS, GOT1, GATA3, RARA, ANGPT1, LOX, FOSL1, CCNA2, IHH, GHR, SOCS2, ACADS, STRN3, SOCS1, ESR1, ESR2, PTPRU, PTPRN, JUNB, PPARGC1B, MAPK1, SDC1, CCND1, EP300, CCND2, SLC25A36, WFDC1, CA4, CALCR, DHH, CAV1, HMGB2, ERBB2, ABCA2, ASL, TIMP3, ALDH1A2, PCSK1, UGT1A9, KRAS, BCL2, ENO2, IDH1, NEFL, NKX2-5, BMP4, TXNIP, MA…	2906	192	13528	1.64872	0.0560116	0.000872974	0.0217808
GOTERM_BP_FAT	GO:0000122~negative regulation of transcription from RNA polymerase II promoter	88	2.41692	1.18846e-05	E2F1, MEF2C, ZBTB32, PPARA, CDX2, NR6A1, ZNF202, PAWR, PAX3, MEN1, EPC1, HOXC8, PROP1, SIN3A, GFI1B, ZNF148, HEY2, POU4F2, RARB, SUPT5H, S100A1, NR2F1, TWIST1, ATF7IP, SP100, GSC, MTA2, STRN3, TP53, HDAC10, VAX2, FOSB, MBD3, NR0B2, HES1, CTNNBIP1, HHEX, MSX1, PIAS4, RPS14, MDM4, ZFP161, SMARCA4, ZMYND11, GLIS3, MTDH, SOX2, PRDM16, CALR, VPS72, NR2C1, VDR, ORC2L, MEIS2, HEXIM2, DRAP1, OVOL1, POU3F…	2906	266	13528	1.54006	0.0581399	0.000893609	0.0226336
GOTERM_BP_FAT	GO:0043933~macromolecular complex subunit organization	200	5.493	1.36317e-05	TUBB2A, CD2AP, SFRS5, MC1R, HIST1H2BI, H2AFZ, SH3BGR, H2AFX, TBPL1, SYK, BRAF, MAGI1, DPAGT1, TAF6L, SFRS1, SPAG9, C14ORF104, RPS14, ATPIF1, UNC13B, ALDOC, DAG1, CALR, MTIF3, PXN, CD74, FBXO5, OLFM1, HIP1, SRP54, MLL, EPRS, SKI, SMAD1, GAS7, SUPT16H, QPRT, COX11, WASF3, COX10, AP2S1, MLH1, HIST2H2AC, GPX3, IL1RAP, TRPV5, ANGPT1, HIST3H2BB, USP16, MYC, COX15, HIST1H1D, BRF1, MTERF, BRF2, SF1, TP53…	2906	710	13528	1.31132	0.0663973	0.00100985	0.0259605
GOTERM_BP_FAT	GO:0006259~DNA metabolic process	149	4.09228	1.73641e-05	FHIT, XRCC4, PDGFB, XRCC6, C8ORF45, PTTG1, XRCC1, PRIM1, MLL5, CDKN2A, CTGF, PSIP1, PMS2, H2AFX, CRY1, CIB1, POLH, C11ORF30, LIG1, NEIL2, POLB, RAD9A, LIG4, ORC1L, RFC5, PNKP, RFC4, RFC1, RFC2, TNFAIP1, XRN2, RAD23B, HMGB2, ACHE, HUS1, PPT1, RRM2B, TTC5, RBX1, RAD51L1, FBXO6, FBXO4, DNMT3A, RECQL5, MLL, CINP, EME1, BRIP1, TSN, RAD54L, BRCA1, FOXP1, ATM, OBFC2B, POLD3, DNASE2, POLD4, TXNDC12, POLD…	2906	506	13528	1.3708	0.0837957	0.00126754	0.0330675
GOTERM_BP_FAT	GO:0016481~negative regulation of transcription	137	3.7627	1.87442e-05	MEF2C, CDX2, THRB, RBM15B, ZNF639, REST, MAF1, TGFB1, EPC1, ZGPAT, HOXC8, PROP1, SIN3A, WWP1, FOXF2, RARB, SUPT5H, BCL7A, MYST1, S100A1, TWIST1, RCOR2, MTA2, STRN3, ZHX1, HDAC10, VAX2, PTPRU, NR0B2, HES1, HHEX, MSX1, SMARCE1, PIAS4, RPS14, SMARCA4, HMGB2, SOX2, CALR, VPS72, NR2C1, VDR, MEIS2, HEXIM2, OVOL2, DRAP1, OVOL1, SKIL, TCF4, NKX2-5, DNMT3A, KLF12, RFX5, KLF11, SNW1, SKI, UBP1, BRCA1, FOXP…	2906	459	13528	1.38946	0.0901464	0.00134868	0.0356952
GOTERM_BP_FAT	GO:0048598~embryonic morphogenesis	98	2.69157	1.91596e-05	EDN1, GNA12, HOXD12, SHH, WNT3, HOXC4, FOXF1, GATA4, RAB23, RARB, TWIST1, RET, MYO6, VAX2, SIX4, HOXD9, HES1, FAM48A, MSX1, HOXD4, SMARCA4, RBP4, TWSG1, BBS4, HOXA13, SOX2, BMPR2, PTK7, GREM1, HOXA1, PFN1, OVOL2, HOXA9, TRAF6, BMP4, TGFBR2, NEUROG1, SKI, EN1, SMAD1, CELSR1, GAS1, HOXB4, DLX2, TULP3, HOXB7, LAMA5, DLX5, HOXB5, PRKAR1A, CHRD, MAB21L2, FOXI1, KLF4, FGF9, PRRX2, PAX3, GLI3, GLI1, MEN…	2906	307	13528	1.48602	0.0920495	0.00135915	0.0364861
GOTERM_BP_FAT	GO:0051437~positive regulation of ubiquitin-protein ligase activity during mitotic cell cycle	31	0.851414	2.34235e-05	PSMB10, FZR1, BTRC, ANAPC11, PSMB7, PSMB6, PSMD1, PSMD2, PSMD3, FBXO5, PSMD7, RPS27A, CUL1, PSMD8, PSMD9, ANAPC2, CDC20, CDC26, CDC27, PSMB8, PSMB9, PSMA2, PSMD14, PSMC6, PSMD12, PSMC4, PSMA5, PSMC3, PSMA3, PSMC1, UBB	2906	68	13528	2.12222	0.111354	0.00163832	0.0446043
GOTERM_BP_FAT	GO:0006915~apoptosis	172	4.72398	2.4767e-05	MEF2C, ITGB3BP, MEF2A, RBM5, TNFSF12, ITSN1, SHF, MRPS30, CRADD, MAP3K5, APP, CDKN2A, TIAM2, HTRA2, GATA6, TIA1, DAP, ACIN1, RNF34, API5, CUL1, RPS27A, CCAR1, CIB1, NET1, TWIST1, MADD, TBRG4, FADD, LIG4, BCL2L13, BCL2L12, STK4, STK3, EP300, RIPK3, RIPK2, PDCD6IP, TNFAIP3, NEK6, TNFRSF12A, ALDOC, NFKBIA, ARF6, PPT1, BCL2L1, STK17A, KRT20, RFFL, PTRH2, GREM1, DIDO1, SLC11A2, PEG10, KRAS, CSE1L, MTC…	2906	602	13528	1.33006	0.117351	0.0017085	0.047162
GOTERM_BP_FAT	GO:0044093~positive regulation of molecular function	168	4.61412	2.54082e-05	XRCC4, PDGFB, EFNA1, BTRC, EDN1, ADCY6, LHCGR, TLR6, TGFB1, SHH, TGFB2, PRKAR2B, MAP3K6, MAP3K5, PRKAR2A, CDKN2A, MYD88, CHRNA7, PDGFC, PRKACB, GNG3, CUL1, MAP2K6, RPS27A, SYK, ANAPC2, ACTN4, MADD, STIM2, PIM1, STIM1, BCL2L13, PSMA2, SPAG9, MAP4K5, EP300, NDEL1, NME1, PSMA5, HTR7, PSMA3, EDF1, RIPK2, ADD2, SMARCA4, FZR1, CAV1, GNAI2, PFKFB2, ADCYAP1R1, ERBB2, MAP4K1, ANAPC11, CD74, PIN1, SLC11A2,…	2906	586	13528	1.3346	0.120198	0.00172903	0.0483827
GOTERM_BP_FAT	GO:0033554~cellular response to stress	163	4.47679	2.58794e-05	MRPS35, XRCC4, CLPB, XRCC6, SNCA, MBIP, PTTG1, XRCC1, MAP3K6, MAP3K5, INSIG2, COL4A3BP, PMS2, H2AFX, TLK2, CRY1, EIF2B3, CCNA2, MAP2K6, CIB1, SYK, MYO6, POLH, C11ORF30, LIG1, NEIL2, AARS, POLB, RAD9A, LIG4, RFC5, PYCR1, PNKP, MAPK1, MAP4K5, RFC4, RFC1, RFC2, NFE2L2, RAD23B, HMGB2, CAV1, DERL1, HUS1, BMPR2, MAP4K1, KRT20, RRM2B, TTC5, SESN1, PXN, RBX1, SLC11A2, LAMB2, RAD51L1, FBXO6, MRPS26, HERPU…	2906	566	13528	1.34063	0.122285	0.00173761	0.0492798
GOTERM_BP_FAT	GO:0007242~intracellular signaling cascade	328	9.00851	2.99552e-05	CYP24A1, IL6ST, EFNA1, THOP1, LHCGR, EDN1, ADCY6, SNIP1, ITSN1, MAP3K6, HMHA1, MAP3K5, MC1R, RAB28, CTGF, PIK3C3, RAB23, PIK3CA, H2AFX, RARA, CHRNA7, RAB26, DEPDC1B, TLK2, GNG3, GNG4, DDAH2, RAB20, CCNA2, MAP2K6, HTR1F, S100A1, SYK, PIK3CG, DEPDC6, BCR, BRAF, PIK3CD, WNK1, RAD9A, PPARGC1B, DCDC1, FARP2, RND2, MAPK1, RND3, SPAG9, SSTR2, RFC4, RND1, SPAG5, HTR7, RAB13, PIAS1, UNC13B, GRB14, DCBLD2,…	2906	1256	13528	1.21569	0.140132	0.00198456	0.0570389
GOTERM_BP_FAT	GO:0002520~immune system development	89	2.44438	3.14949e-05	XRCC4, ZBTB32, NBN, MAEA, MMP9, XRCC6, MLH1, NFKB2, PRDX3, IL15, TPD52, VPS33A, TGFB1, FLT3LG, TGFB2, MEN1, MLL5, ASH2L, CASP8, PMS2, ACIN1, MYST1, FGF3, MB, SYK, LIG1, TP53, CDK6, NFAM1, SIX4, LIG4, CD164, CARD11, RPS19, RPS14, NCOA6, ADAM17, TSHR, ADD2, CALCR, TWSG1, CSF1, ZBTB16, ADA, CD74, BCL2, BCL11A, PPP3CB, HOXA9, BCL6, TCEA1, TRAF6, RUNX1, NKX2-5, ERCC1, APC, EPO, EXO1, BMP4, MSH6, KLF6,…	2906	276	13528	1.50113	0.146779	0.0020594	0.0599699
GOTERM_BP_FAT	GO:0006281~DNA repair	91	2.49931	3.33073e-05	XRCC4, CLSPN, NBN, XRCC6, UVRAG, MLH1, MLH3, PTTG1, XRCC1, PMS2L3, MEN1, FANCL, SLK, FANCE, PMS2, H2AFX, FANCF, FANCG, CRY1, TOP2A, CIB1, POLH, C11ORF30, LIG1, DDB1, NEIL2, TP53, APTX, RAD9A, POLB, LIG4, CDK7, C9ORF80, RAD51, UBE2N, RFC5, EYA3, RECQL, EYA4, XPA, PNKP, EYA1, XPC, RFC4, RFC1, RFC2, FANCD2, NCOA6, GADD45A, RAD23B, HMGB2, HUS1, MGMT, BCCIP, RRM2B, TTC5, RBX1, ERCC8, TYMS, RPA2, CHD1L…	2906	284	13528	1.49163	0.154537	0.00214988	0.0634198
GOTERM_BP_FAT	GO:0043161~proteasomal ubiquitin-dependent protein catabolic process	41	1.12606	3.41761e-05	PSMB10, RAD23B, SYVN1, DERL1, PPP2R5C, UBE2G2, ANAPC11, STUB1, CD2AP, OS9, PSMB7, PSMB6, PPP2CB, PSMD1, FBXO6, PSMD2, PSMD3, PSMD7, PSMD8, BUB3, RPS27A, PSMD9, ANAPC2, CDC20, CDC26, CDC27, PSMB8, PSMB9, PSMA2, PSMD14, PSMC6, MAD2L1, SEC61B, PSMC4, PSMD12, PSMA5, PSMC3, PSMA3, PSMC1, FAF1, UBB	2906	102	13528	1.87121	0.158232	0.00217801	0.0650737
GOTERM_BP_FAT	GO:0010498~proteasomal protein catabolic process	41	1.12606	3.41761e-05	PSMB10, RAD23B, SYVN1, DERL1, PPP2R5C, UBE2G2, ANAPC11, STUB1, CD2AP, OS9, PSMB7, PSMB6, PPP2CB, PSMD1, FBXO6, PSMD2, PSMD3, PSMD7, PSMD8, BUB3, RPS27A, PSMD9, ANAPC2, CDC20, CDC26, CDC27, PSMB8, PSMB9, PSMA2, PSMD14, PSMC6, MAD2L1, SEC61B, PSMC4, PSMD12, PSMA5, PSMC3, PSMA3, PSMC1, FAF1, UBB	2906	102	13528	1.87121	0.158232	0.00217801	0.0650737
GOTERM_BP_FAT	GO:0006916~anti-apoptosis	70	1.92255	3.94128e-05	MEF2C, SNCA, BNIP3, PAK7, GPX1, BAG4, BDNF, MYD88, BAG1, PAX7, TPT1, PIK3CA, DDAH2, MYC, API5, RPS27A, NOL3, SGK3, BRAF, SOCS2, ESR1, PRKCI, POLB, ESR2, HBXIP, DAPK1, AMIGO2, PROK2, BNIP1, BNIP2, TNFRSF10D, TXNDC5, AVEN, HSPB1, RIPK2, ADAM17, UBB, PRNP, TNFAIP3, FAIM2, YWHAZ, SYVN1, PAFAH2, NFKBIA, BCL2L1, TCF7L2, IGF1R, BCL2, NPM1, TRAF6, NKX2-5, STAMBP, TBX3, SPHK2, IL7, VHL, BECN1, SPHK1, BIRC…	2906	206	13528	1.58186	0.180159	0.00247998	0.0750411
GOTERM_BP_FAT	GO:0012501~programmed cell death	173	4.75144	3.98739e-05	MEF2C, ITGB3BP, MEF2A, RBM5, TNFSF12, ITSN1, SHF, MRPS30, CRADD, MAP3K5, APP, CDKN2A, TIAM2, HTRA2, GATA6, TIA1, DAP, ACIN1, RNF34, API5, CUL1, RPS27A, CCAR1, CIB1, NET1, TWIST1, MADD, TBRG4, FADD, LIG4, BCL2L13, BCL2L12, STK4, STK3, EP300, RIPK3, RIPK2, PDCD6IP, TNFAIP3, NEK6, TNFRSF12A, ALDOC, NFKBIA, ARF6, PPT1, BCL2L1, STK17A, KRT20, RFFL, PTRH2, GREM1, DIDO1, SLC11A2, PEG10, KRAS, CSE1L, MTC…	2906	611	13528	1.31808	0.182062	0.00247802	0.0759187
GOTERM_BP_FAT	GO:0065003~macromolecular complex assembly	186	5.10849	4.34849e-05	TUBB2A, CD2AP, SFRS5, MC1R, HIST1H2BI, SH3BGR, H2AFZ, H2AFX, TBPL1, SYK, MAGI1, BRAF, DPAGT1, TAF6L, SFRS1, SPAG9, C14ORF104, RPS14, ATPIF1, UNC13B, ALDOC, DAG1, CALR, PXN, CD74, FBXO5, OLFM1, HIP1, SRP54, MLL, EPRS, SKI, SMAD1, GAS7, QPRT, COX11, WASF3, COX10, AP2S1, MLH1, HIST2H2AC, IL1RAP, GPX3, TRPV5, ANGPT1, USP16, HIST3H2BB, MYC, COX15, HIST1H1D, BRF1, BRF2, TP53, SF1, TTF1, CBR4, GTF2B, RA…	2906	665	13528	1.30205	0.196814	0.00266922	0.0827913
GOTERM_BP_FAT	GO:0051052~regulation of DNA metabolic process	44	1.20846	5.29936e-05	NBN, PDGFB, HUS1, MLH1, TNFSF12, TERF2IP, CALR, TGFB1, GLI1, RPS3, STAT6, ERCC8, IGF1R, PPP2CA, H2AFX, BCL6, PDGFC, SHC1, MYC, ERCC4, TINF2, TERF2, ERCC1, EPO, MSH6, PPP2R1A, POLH, NF2, MSH2, S100A11, NDFIP1, TP53, TTF1, PRKCG, RAD9A, BRCA1, CDK2, TNKS2, RAD51, UBE2N, EYA3, EYA1, PCNA, ID3	2906	114	13528	1.79674	0.234399	0.00321284	0.100886
GOTERM_BP_FAT	GO:0006289~nucleotide-excision repair	26	0.71409	6.03107e-05	RAD23B, RPA2, ERCC8, ERCC6, SLK, ERCC4, ERCC1, LIG1, DDB1, NEIL2, TP53, LIG4, CDK7, RFC5, POLD3, XPA, POLD4, PNKP, RFC4, XPC, RFC1, RFC2, POLD1, POLD2, PCNA, BTBD12	2906	55	13528	2.20064	0.262121	0.00361221	0.114808
GOTERM_BP_FAT	GO:0042493~response to drug	72	1.97748	6.09085e-05	NBN, PTGS2, STAR, LHCGR, SNCA, RPS6KB1, XRCC1, KCNJ11, TGFB1, SLC2A8, FOS, BDNF, SLC1A2, SEMA3C, RAB6A, LOX, FOSL1, MAP2K6, CYP1A1, SOCS1, EMX2, TP53, GRIN2A, JUNB, MMP12, BLMH, CCND1, EP300, NME1, ADAM17, WFDC1, CA4, GNAS, CAV1, YWHAZ, ERBB2, HMGCS1, HIATL1, ABCA2, CDH1, HADHA, PCSK1, UGT1A9, BLOC1S3, ALDH1A3, BCL2, ENO2, ENO3, APC, TXNIP, SRP54, GNAO1, MAT2A, MSH2, SNX27, MAP1B, TGFBR2, ATP1A3,…	2906	216	13528	1.55173	0.264341	0.00360511	0.115946
GOTERM_BP_FAT	GO:0070727~cellular macromolecule localization	123	3.37819	6.46469e-05	RAB3GAP2, GRPEL2, GRPEL1, AP1G1, LHCGR, AURKB, TGFB1, TGFB2, SSR1, HOMER3, TIMM9, RPL11, SAR1A, MYO6, AP4M1, PTPRU, NUPL2, TIMM8B, TNKS2, MAPK1, COPG2, SEC61B, PEX26, MRPL45, PACS1, BBS4, STX7, DERL1, COPZ1, CACNB1, SNX1, NFKBIA, NAPB, RFFL, CALR, CDC37, CD74, STX12, CSE1L, STX17, NPM1, SUPT7L, STX11, STX10, SEC61A1, SRP54, TOMM40, CASC3, TRNT1, PPIH, PRICKLE1, TOMM70A, PCNA, GOSR2, GOSR1, LGTN, …	2906	414	13528	1.38307	0.278073	0.00378156	0.123058
GOTERM_BP_FAT	GO:0048568~embryonic organ development	60	1.6479	6.52097e-05	FGF9, EDN1, PRRX2, GLI3, SHH, GLI1, MEN1, GATA2, KCNQ4, FOXF1, HOXC4, GATA4, FOXF2, POU4F3, RARB, ALX4, MYC, MYO6, GSC, OTX1, VAX2, SIX4, JUNB, HOXD9, EYA1, HOXD4, GNAS, RBP4, SOX2, COL2A1, EGLN1, TCF7L2, ADA, HOXA1, ALDH1A2, OVOL2, ALDH1A3, GBX2, GFI1, PCSK5, FOXL2, MLL, EPAS1, TGFBR2, HSPG2, NEUROG1, FZD3, GAS1, HOXB4, DLX2, PLK4, TULP3, HOXB7, SP1, DLX5, HOXB5, SP3, NEUROD1, PBX1, FOXI1	2906	172	13528	1.62391	0.280118	0.00377066	0.124129
GOTERM_BP_FAT	GO:0034613~cellular protein localization	122	3.35073	7.23746e-05	RAB3GAP2, GRPEL2, GRPEL1, AP1G1, LHCGR, AURKB, TGFB1, TGFB2, SSR1, HOMER3, TIMM9, RPL11, SAR1A, MYO6, AP4M1, PTPRU, NUPL2, TIMM8B, TNKS2, MAPK1, COPG2, SEC61B, PEX26, MRPL45, PACS1, BBS4, STX7, DERL1, COPZ1, CACNB1, SNX1, NFKBIA, NAPB, RFFL, CALR, CDC37, CD74, STX12, CSE1L, STX17, NPM1, SUPT7L, STX11, STX10, SEC61A1, SRP54, TOMM40, TRNT1, PPIH, PRICKLE1, TOMM70A, PCNA, GOSR2, GOSR1, LGTN, CLTA, A…	2906	411	13528	1.38183	0.305651	0.00413666	0.137759
GOTERM_BP_FAT	GO:0031145~anaphase-promoting complex-dependent proteasomal ubiquitin-dependent protein catabolic process	29	0.796484	7.30858e-05	PSMB10, ANAPC11, PSMB7, PSMB6, PSMD1, PSMD2, PSMD3, PSMD7, BUB3, RPS27A, PSMD8, PSMD9, ANAPC2, CDC20, CDC26, CDC27, PSMB8, PSMB9, PSMA2, PSMD14, PSMC6, MAD2L1, PSMD12, PSMC4, PSMA5, PSMC3, PSMC1, PSMA3, UBB	2906	65	13528	2.07693	0.308136	0.00413039	0.139111
GOTERM_BP_FAT	GO:0016310~phosphorylation	217	5.9599	7.73568e-05	EFNA1, SNCA, AURKB, MAP3K6, MAP3K5, APP, PSKH1, COL4A3BP, PIK3C3, MAP3K8, CLK4, PIK3CA, CHRNA7, GNG3, TLK2, MAP2K6, SYK, PIK3CG, TYRO3, BCR, BRAF, PIK3CD, WNK1, PIM1, MARK3, MAPK1, PNKP, SPAG9, SCYL1, MAPK6, NME1, ROR1, NEK4, NEK6, NEK7, GNAI2, NEK2, ERBB2, HUS1, STK17A, EPHB3, EPHB4, ATP6V0B, CD74, EPHB2, VRK2, TGFBR2, MGC42105, TAOK3, EPHA1, ATM, EPHA5, EPHA4, EPHA7, GRK4, FUK, CDC42BPB, BCKDK,…	2906	800	13528	1.26272	0.322871	0.00432278	0.147235
GOTERM_BP_FAT	GO:0006974~response to DNA damage stimulus	112	3.07608	8.79898e-05	XRCC4, MRPS35, XRCC6, PTTG1, XRCC1, PMS2, H2AFX, TLK2, CRY1, CCNA2, MAP2K6, CIB1, MYO6, POLH, C11ORF30, LIG1, NEIL2, POLB, RAD9A, LIG4, RFC5, PNKP, MAPK1, RFC4, RFC1, RFC2, RAD23B, HMGB2, HUS1, RRM2B, TTC5, SESN1, RBX1, RAD51L1, FBXO6, MRPS26, RECQL5, EME1, BRIP1, RAD54L, BRCA1, ATM, OBFC2B, POLD3, POLD4, TXNDC12, CDKN1A, POLD1, POLD2, SUPT16H, TDG, PCNA, PARP3, ABL1, BTBD12, CLSPN, NBN, UVRAG, M…	2906	373	13528	1.39781	0.358206	0.00486164	0.167457
GOTERM_BP_FAT	GO:0044092~negative regulation of molecular function	102	2.80143	9.20725e-05	HMGCR, SNCA, ADCY6, MBIP, TGFB2, ZGPAT, CDKN2A, RPS27A, DEPDC6, ANAPC2, STIM2, PIM1, PKIB, HBXIP, PSMA2, SSTR2, MAD2L1, PSMA5, PSMA3, CSTB, ATPIF1, PALM, CAV1, FZR1, GNAI3, GNAI2, GNAI1, NFKBIA, ANAPC11, PSMB7, PSMB6, HEXIM2, GMIP, ARG2, FBXO5, HERPUD1, SMAD6, NDFIP1, CDC20, CDC26, CDC27, PSMB8, PSMB9, CDKN1C, PSMC6, CDKN1A, PSMC4, PSMC3, RGS4, PSMC1, DNAJB6, LEPR, PRKAG2, PRDX3, GABBR2, LATS1, R…	2906	334	13528	1.42165	0.371278	0.0050315	0.175221
GOTERM_BP_FAT	GO:0006511~ubiquitin-dependent protein catabolic process	78	2.14227	0.000103183	USPL1, BTRC, UBE2G1, PPP2R5C, UBE2G2, UCHL1, BAP1, CD2AP, OS9, PSMD1, PSMD2, FBXL12, PSMD3, USP10, USP16, USP15, PSMD7, CUL1, PSMD8, RPS27A, PSMD9, ANAPC2, DDB1, UBR2, PSMA2, SEC61B, MAD2L1, PSMA5, PSMA3, SIAH1, UCHL3, UBB, SIAH2, USP25, CHFR, FBXO11, PSMB10, USP7, RAD23B, USP30, FZR1, SYVN1, DERL1, USP8, UBE3A, USP5, USP4, NEDD8, ANAPC11, STUB1, ARIH1, PSMB7, PSMB6, PPP2CB, FBXO6, FBXO4, USP34, …	2906	242	13528	1.50044	0.405521	0.00557654	0.196345
GOTERM_BP_FAT	GO:0043086~negative regulation of catalytic activity	87	2.38945	0.000110446	HMGCR, LEPR, PRKAG2, SNCA, ADCY6, PRDX3, GABBR2, MBIP, LATS1, TGFB2, MEN1, ZGPAT, GPX1, SPRY1, CDKN2A, PSMD1, PSMD2, PSMD3, CDK5RAP1, PSMD7, RPS27A, PSMD8, PSMD9, DEPDC6, PPP2R1A, ANAPC2, TP53, PKIB, HBXIP, PSMA2, GNAL, SSTR2, MAD2L1, PSMA5, PSMA3, CSTB, SORT1, ATPIF1, UBB, GADD45A, PSMB10, PALM, CAV1, FZR1, GNAI3, GNAI2, GNAI1, OPRK1, NPY2R, ANAPC11, PSMB7, PSMB6, GMIP, HEXIM2, ARG2, PPP2CA, MLL…	2906	277	13528	1.4621	0.42689	0.00590459	0.210151
GOTERM_BP_FAT	GO:0009991~response to extracellular stimulus	72	1.97748	0.000116133	BAT5, CYP24A1, PPARA, KYNU, STAR, PTGS2, IL6ST, FOXA3, LEPR, IGFBP7, TTPA, RPS6KB1, SHH, TGFB1, FOS, MLL5, SLC1A2, CD44, CDKN2B, SLC22A3, RARA, ANGPT1, DDAH2, FOSL1, GHR, SUOX, SP100, CYP1A1, ACADS, TP53, SSTR2, CCND1, RPS19, ATG4C, C14ORF104, GHRH, RBP4, CAV1, GNAI2, SKIV2L, SOX2, BMPR2, ASNS, ASL, VARS, TIMP3, GLRX2, ALDH1A2, PCSK1, VDR, UGT1A9, BCL2, PCSK9, MUC1, BMP4, BECN1, MSH5, MAP1B, BCKD…	2906	220	13528	1.52352	0.443086	0.00614258	0.220962
GOTERM_BP_FAT	GO:0010212~response to ionizing radiation	27	0.741555	0.000116169	XRCC4, CAV1, XRCC6, MEN1, CASP6, GPX1, ERCC8, ERCC6, BCL2, H2AFX, ERCC1, MSH2, TP53, LIG4, RAD54L, C9ORF80, ATM, BRCA1, SOD2, OBFC2B, EYA3, CCND1, EYA1, FANCD2, BAX, LRP2, DCUN1D3	2906	60	13528	2.09484	0.443188	0.00608069	0.221031
GOTERM_BP_FAT	GO:0007264~small GTPase mediated signal transduction	94	2.58171	0.000123487	RHOJ, GNA12, IQGAP3, RGL3, IQGAP2, RHOQ, SHOC2, RRAD, ITSN1, IQGAP1, RGL1, RGL2, ARHGAP5, NISCH, RAB28, ARHGAP1, RAB23, RALA, RRAS, RHOC, SHC1, RAB26, RAB6A, SHC3, ARL5B, RAB20, SAR1A, RHOG, ARL2, ARL1, RABL4, ARHGEF1, RABL3, BRAF, RALBP1, RAB4B, ARL6, ELMO1, FARP2, RND2, MAPK1, RND3, RND1, GNB1, KRIT1, REM1, RAB13, SIAH2, ARL4D, NKIRAS2, ARHGDIG, RALGPS2, USP8, MAPKAPK3, ARF6, KRAS, RAC2, RASGRP…	2906	305	13528	1.43472	0.463351	0.00639607	0.234937
GOTERM_BP_FAT	GO:0032355~response to estradiol stimulus	25	0.686625	0.000130393	DHH, PDGFB, PTGS2, SLC6A1, TGFB1, SHH, CASP6, ALDH1A2, ENO2, RARA, CCNA2, NKX2-5, GHR, IHH, TXNIP, BMP4, SOCS2, STRN3, SOCS1, MAP1B, STAT3, DUSP1, CCND2, SLC25A36, WFDC1	2906	54	13528	2.15518	0.481712	0.00668394	0.248062
GOTERM_BP_FAT	GO:0030097~hemopoiesis	76	2.08734	0.000131596	XRCC4, ZBTB32, MAEA, MMP9, IL15, PRDX3, TPD52, VPS33A, TGFB1, FLT3LG, TGFB2, MEN1, MLL5, ASH2L, CASP8, ACIN1, MYST1, MB, SYK, TP53, CDK6, NFAM1, LIG4, CD164, CARD11, RPS19, RPS14, NCOA6, ADAM17, TSHR, ADD2, CALCR, TWSG1, CSF1, ZBTB16, ADA, CD74, BCL2, BCL11A, PPP3CB, HOXA9, BCL6, TCEA1, TRAF6, RUNX1, NKX2-5, ERCC1, APC, EPO, BMP4, KLF6, MLL, EPAS1, IL7, FLT3, MSH2, SMAD5, TGFBR2, ZNF160, BPGM, FO…	2906	236	13528	1.49913	0.484846	0.00667749	0.250348
GOTERM_BP_FAT	GO:0008219~cell death	196	5.38314	0.00013374	MEF2C, ITGB3BP, MEF2A, ITSN1, SHF, MAP3K5, APP, HTRA2, CUL1, TWIST1, CCAR1, TBRG4, POLB, LIG4, BCL2L13, BCL2L12, NEK6, ALDOC, NFKBIA, ARF6, PPT1, STK17A, KRT20, BCL2L1, RFFL, DIDO1, SLC11A2, KRAS, HIP1, MLL, ABR, KLF11, GARS, GAS1, ATM, NCKAP1, FXR1, SFRP5, BFAR, RABEP1, LY86, BNIP3, ZNF346, DAXX, MCF2L, RTN3, BNIPL, BAG4, GPX1, NISCH, BAG1, BAG2, SPG20, SEMA3A, TOP2A, MYC, DEDD2, TP53, APTX, ARH…	2906	719	13528	1.26901	0.490383	0.0067183	0.254422
GOTERM_BP_FAT	GO:0006297~nucleotide-excision repair, DNA gap filling	12	0.32958	0.000148106	POLD3, RFC5, POLD4, RPA2, RFC4, RFC1, RFC2, POLD1, LIG1, POLD2, PCNA, LIG4	2906	17	13528	3.28602	0.525982	0.00736394	0.281714
GOTERM_BP_FAT	GO:0007584~response to nutrient	50	1.37325	0.000150357	BAT5, CYP24A1, KYNU, PTGS2, STAR, IL6ST, IGFBP7, TTPA, RPS6KB1, SHH, TGFB1, MLL5, CD44, CDKN2B, ANGPT1, RARA, DDAH2, SUOX, SP100, CYP1A1, SSTR2, CCND1, C14ORF104, RBP4, CAV1, GNAI2, SKIV2L, SOX2, ASL, VARS, TIMP3, VDR, ALDH1A2, UGT1A9, BCL2, BMP4, MUC1, MSH5, BCKDHB, TGFBR2, MAP1B, CSNK2B, STAT1, DUSP1, ARSA, OVCA2, CP, LRP2, KLF4, VLDLR	2906	140	13528	1.66257	0.53133	0.00740243	0.28599
GOTERM_BP_FAT	GO:0044265~cellular macromolecule catabolic process	197	5.4106	0.000154749	DZIP3, PPP2R5C, CD2AP, RBM8A, WWP1, CUL1, AUP1, ANAPC2, UBR2, PNKP, MAD2L1, PIAS4, FBXL8, PIAS3, BACE2, FBXL6, PIAS1, EIF2C3, RAD23B, WDR5B, PPT1, RFFL, ARIH1, FBXO6, FBXO5, FBXO4, FBXO3, FBXO8, CDC20, CDC26, CDC27, ATM, RNF6, RNF7, BTBD12, LDLR, UBE2G1, UBE2G2, UFC1, BNIP3, MLH1, SENP7, AUH, SENP6, FANCL, MAP1LC3B, FBXL12, USP10, USP16, MYC, USP15, DEDD2, ZFP36, ABCE1, ADAM10, ZCCHC11, EXOSC7, H…	2906	725	13528	1.26493	0.541593	0.00754419	0.294333
GOTERM_BP_FAT	GO:0006886~intracellular protein transport	111	3.04861	0.000157774	GRPEL2, RAB3GAP2, GRPEL1, AP1G1, LHCGR, TGFB1, TGFB2, SSR1, HOMER3, TIMM9, RPL11, SAR1A, MYO6, AP4M1, NUPL2, TIMM8B, MAPK1, COPG2, SEC61B, PEX26, MRPL45, PACS1, STX7, DERL1, COPZ1, CACNB1, NFKBIA, SNX1, NAPB, RFFL, CALR, CDC37, CD74, STX12, CSE1L, STX17, NPM1, STX11, STX10, SEC61A1, SRP54, TOMM40, TRNT1, PPIH, PRICKLE1, TOMM70A, PCNA, GOSR2, GOSR1, LGTN, CLTA, PDIA3, AP1B1, FGF9, AP2S1, SYNGR1, G…	2906	374	13528	1.38162	0.548528	0.0076174	0.300077
GOTERM_BP_FAT	GO:0050767~regulation of neurogenesis	57	1.5655	0.000163476	XRCC4, NBN, STAR, EFNA1, XRCC6, REST, TTL, SHH, TGFB1, ACTR3, BDNF, MAPT, SEMA3F, CDK5RAP2, SEMA3A, CDK5RAP1, ASPM, ARHGEF1, LBX1, BARHL2, TP53, LIG4, HES1, SMO, EYA1, NDEL1, CCND2, TGIF2, DBN1, TNFRSF12A, SOX2, SOX5, CDH2, CALR, TIMP2, EPHB2, BCL2, NUMB, TLX3, NKX2-5, NEFL, BMP4, MAP1B, RTN4R, NEUROG3, SMAD1, ISL1, NKX6-1, DLX2, RNF6, YWHAH, ULK1, NEUROD1, PBX1, OMG, CACNA1A, BMPR1A	2906	166	13528	1.59847	0.561321	0.00781679	0.310907
GOTERM_BP_FAT	GO:0046907~intracellular transport	180	4.9437	0.000193389	RAB3GAP2, GRPEL2, GRPEL1, NRBP1, AP1G1, RBM15B, LHCGR, TGFB1, TGFB2, HOOK3, SSR1, TAPBP, HOOK1, STARD3, APP, RAE1, HOMER3, TIMM9, DNAJC6, VPS13A, RPL11, SAR1A, SCAMP1, NUP133, SCAMP2, MYO6, AP4M1, NUPL2, TIMM8B, HHEX, MAPK1, NPC1, COPG2, NPC2, AAAS, NDEL1, SEC61B, SCYL1, VAMP8, ATP2C1, TXNDC5, PEX26, VPS26B, MRPL45, MYBBP1A, LRPPRC, TRAPPC3, PACS1, ARFGAP1, ZC3H3, BBS4, DERL1, STX7, COPZ1, CACNB1…	2906	657	13528	1.2754	0.622722	0.00915381	0.367696
GOTERM_BP_FAT	GO:0016265~death	196	5.38314	0.000198451	MEF2C, ITGB3BP, MEF2A, ITSN1, SHF, MAP3K5, APP, HTRA2, CUL1, TWIST1, CCAR1, TBRG4, POLB, LIG4, BCL2L13, BCL2L12, NEK6, ALDOC, NFKBIA, ARF6, PPT1, STK17A, KRT20, BCL2L1, RFFL, DIDO1, SLC11A2, KRAS, HIP1, MLL, ABR, KLF11, GARS, GAS1, ATM, NCKAP1, FXR1, SFRP5, BFAR, RABEP1, LY86, BNIP3, ZNF346, DAXX, MCF2L, RTN3, BNIPL, BAG4, GPX1, NISCH, BAG1, BAG2, SPG20, SEMA3A, TOP2A, MYC, DEDD2, TP53, APTX, ARH…	2906	724	13528	1.26025	0.632229	0.00930498	0.377305
GOTERM_BP_FAT	GO:0031667~response to nutrient levels	65	1.78522	0.000199563	BAT5, CYP24A1, PPARA, KYNU, PTGS2, STAR, IL6ST, FOXA3, LEPR, IGFBP7, TTPA, RPS6KB1, SHH, TGFB1, MLL5, CD44, CDKN2B, SLC22A3, RARA, ANGPT1, DDAH2, GHR, SUOX, SP100, CYP1A1, ACADS, TP53, SSTR2, CCND1, ATG4C, C14ORF104, GHRH, RBP4, CAV1, GNAI2, SKIV2L, SOX2, BMPR2, ASNS, ASL, VARS, TIMP3, ALDH1A2, PCSK1, VDR, UGT1A9, BCL2, PCSK9, BMP4, MUC1, BECN1, MSH5, MAP1B, BCKDHB, TGFBR2, CSNK2B, STAT1, SOD2, D…	2906	197	13528	1.53598	0.634284	0.00927062	0.379415
GOTERM_BP_FAT	GO:0009057~macromolecule catabolic process	209	5.74018	0.000242661	DZIP3, PPP2R5C, CD2AP, RBM8A, WWP1, CUL1, AUP1, ANAPC2, UBR2, PNKP, ADAMTS9, MAD2L1, PIAS4, FBXL8, PIAS3, BACE2, YME1L1, FBXL6, PIAS1, EIF2C3, RAD23B, WDR5B, PPT1, RFFL, ARIH1, FBXO6, FBXO5, FBXO4, FBXO3, FBXO8, CDC20, CDC26, CDC27, ATM, RNF6, RNF7, BTBD12, LDLR, UBE2G1, UBE2G2, UFC1, BNIP3, MLH1, SENP7, AUH, SENP6, FANCL, MAP1LC3B, FBXL12, USP10, USP16, MYC, USP15, DEDD2, ZFP36, ABCE1, ADAM10, Z…	2906	781	13528	1.24576	0.705701	0.0111589	0.461175
GOTERM_BP_FAT	GO:0008284~positive regulation of cell proliferation	120	3.2958	0.000244326	XRCC4, CDX2, PTGS2, PDGFB, IL6ST, EDN1, RPS6KB1, IL15, TNFSF12, TGFB1, SHH, SSR1, TGFB2, FNTB, PDGFC, CHRNA7, CCNA2, EBI3, MATK, SYK, TBRG4, LIG4, VEGFB, HES1, MAPK1, NME1, RIPK2, GNAI2, ERBB2, SOX2, CNTFR, BCL2L1, CALR, ADA, KRAS, RAC2, AGGF1, NPM1, LHX5, NKX2-5, DNAJA2, KLF5, BMP4, SPHK2, SPHK1, TGFBR2, TNFRSF13C, GAS1, FOXP1, POLD4, CORO1A, CDKN1A, DLX5, MAB21L2, ADRA1D, NBN, E2F3, FOSL2, FGF9…	2906	414	13528	1.34933	0.708161	0.0111335	0.464332
GOTERM_BP_FAT	GO:0032990~cell part morphogenesis	80	2.1972	0.000254896	NRP2, COX10, UCHL1, RAB3IP, SHH, BDNF, APP, COL4A3BP, POU4F3, MKKS, POU4F2, SEMA3B, POU4F1, SEMA3A, TOP2B, RPS27A, EFNB3, SSBP1, BAIAP2, STXBP1, TBCE, VAX2, ARL6, PCM1, TBR1, CDK5, SLIT1, VASP, SLIT3, SMO, MFN1, SLITRK1, SLITRK3, NDEL1, SIAH1, UBB, SLITRK5, C1ORF187, BBS4, BBS5, LPPR4, ERBB2, TTC8, EPHB3, MYCBP2, EPHB2, ALCAM, HOXA1, IGF1R, LAMB2, BCL2, NUMB, B3GNT1, GBX2, RTN4RL2, NEFL, ETV4, AP…	2906	256	13528	1.45475	0.723305	0.0115084	0.484373
GOTERM_BP_FAT	GO:0048534~hemopoietic or lymphoid organ development	81	2.22466	0.000259175	XRCC4, ZBTB32, MAEA, MMP9, NFKB2, IL15, PRDX3, TPD52, VPS33A, TGFB1, FLT3LG, TGFB2, MEN1, MLL5, ASH2L, CASP8, ACIN1, MYST1, FGF3, MB, SYK, TP53, CDK6, NFAM1, SIX4, LIG4, CD164, CARD11, RPS19, RPS14, NCOA6, ADAM17, TSHR, ADD2, CALCR, TWSG1, CSF1, ZBTB16, ADA, CD74, BCL2, BCL11A, PPP3CB, HOXA9, BCL6, TCEA1, TRAF6, RUNX1, NKX2-5, ERCC1, APC, EPO, BMP4, KLF6, MLL, EPAS1, IL7, FLT3, MSH2, JARID2, SMAD…	2906	260	13528	1.45027	0.729209	0.0115966	0.492485
GOTERM_BP_FAT	GO:0048666~neuron development	101	2.77396	0.000273591	STRN, GRIN3A, SHH, TGFB2, BDNF, APP, HTRA2, CD44, PITX3, SS18L1, RPS27A, RET, MYO6, EFNB3, STMN3, BAIAP2, VAX2, TBR1, FARP2, HOXD9, HES1, SLITRK1, SLITRK3, NDEL1, RND1, IGSF9, SLITRK5, C1ORF187, BBS4, LPPR4, ERBB2, PPT1, EPHB3, SRF, EPHB2, ALCAM, HOXA1, LAMB2, NUMB, MTCH1, B3GNT1, SPTBN4, EN1, EN2, GAS1, GAS7, CDKN1C, EPHA4, EPHA7, ULK1, ULK2, DLX5, CACNA1A, MYH10, NRP2, UCHL1, EFHD1, DYNLL2, POU…	2906	339	13528	1.38695	0.748192	0.0121301	0.519812
GOTERM_BP_FAT	GO:0043523~regulation of neuron apoptosis	35	0.961274	0.000298463	XRCC4, SNCB, SNCA, PPT1, BCL2L1, NR3C1, PRDX3, ITSN1, TGFB2, GPX1, CASP6, BDNF, KRAS, CASP9, BCL2, GRID2, PCSK9, NEFL, RASA1, GHR, SPPL3, MSH2, AARS, ESR1, ADNP, TP53, LIG4, ESR2, CDK5, ATM, SOD2, EPHA7, BAX, CACNA1A, F2R	2906	90	13528	1.81035	0.777866	0.0131105	0.56694
GOTERM_BP_FAT	GO:0051960~regulation of nervous system development	63	1.73029	0.000299237	XRCC4, NBN, STAR, EFNA1, XRCC6, REST, SHH, TGFB1, TTL, GLI1, ACTR3, BDNF, MAPT, SEMA3F, CDK5RAP2, SEMA3A, CDK5RAP1, RPS27A, ASPM, LBX1, ARHGEF1, BARHL2, TP53, LIG4, HES1, SMO, EYA1, NDEL1, CCND2, TGIF2, UBB, DBN1, TNFRSF12A, SOX2, SOX5, CDH2, TIMP2, CALR, EPHB2, BCL2, NUMB, LHX5, TLX3, NEFL, NKX2-5, BMP4, MAP1B, RTN4R, SMAD1, NEUROG3, ISL1, NKX6-1, DLX2, RNF6, YWHAH, TULP3, ULK1, NEUROD1, PBX1, O…	2906	192	13528	1.52749	0.778732	0.0130307	0.568407
GOTERM_BP_FAT	GO:0016192~vesicle-mediated transport	159	4.36693	0.000320381	NRBP1, AP1G1, SNCA, SYT6, ITSN2, ITSN1, VPS33B, MEGF10, VPS33A, HOOK3, TAPBP, HOOK1, GATA2, APP, PACSIN2, CLEC4F, DNAJC6, VPS13A, SAR1A, RBM12, SCAMP1, SCAMP2, MYO6, AP4M1, YIF1A, ERGIC3, NPC1, COPG2, DOC2A, ARRB2, SCYL1, NME1, VAMP8, TXNDC5, VAMP4, RAB13, UNC13B, TRAPPC3, PACS1, ARFGAP1, CAV1, STX7, GNAI3, COPZ1, SNX1, ARF6, PPT1, NAPB, SNX3, ARFGEF2, PEX5L, FTH1, LLGL1, RIMS4, STX12, KRAS, BLOC…	2906	576	13528	1.28503	0.801105	0.0138258	0.608454
GOTERM_BP_FAT	GO:0048562~embryonic organ morphogenesis	47	1.29085	0.000321112	RBP4, FGF9, SOX2, EDN1, COL2A1, PRRX2, GLI3, TCF7L2, GLI1, MEN1, HOXA1, KCNQ4, OVOL2, HOXC4, ALDH1A3, GATA4, POU4F3, GBX2, GFI1, RARB, ALX4, MYC, FOXL2, MYO6, GSC, OTX1, TGFBR2, HSPG2, NEUROG1, FZD3, VAX2, SIX4, GAS1, HOXD9, DLX2, HOXB4, EYA1, TULP3, SP1, HOXB7, HOXB5, SP3, DLX5, HOXD4, NEUROD1, GNAS, FOXI1	2906	133	13528	1.64507	0.801837	0.0137395	0.609838
GOTERM_BP_FAT	GO:0045664~regulation of neuron differentiation	47	1.29085	0.000321112	NBN, EFNA1, TNFRSF12A, SOX2, SOX5, REST, CDH2, TIMP2, CALR, TTL, SHH, EPHB2, ACTR3, BDNF, SEMA3F, BCL2, MAPT, NUMB, CDK5RAP2, SEMA3A, TLX3, CDK5RAP1, NEFL, NKX2-5, ASPM, LBX1, ARHGEF1, MAP1B, BARHL2, RTN4R, NEUROG3, SMAD1, ISL1, NKX6-1, HES1, EYA1, RNF6, NDEL1, YWHAH, ULK1, CCND2, NEUROD1, PBX1, TGIF2, OMG, DBN1, CACNA1A	2906	133	13528	1.64507	0.801837	0.0137395	0.609838
GOTERM_BP_FAT	GO:0008285~negative regulation of cell proliferation	106	2.91129	0.000346	RARRES3, CNOT8, PTGS2, FGFRL1, RBM5, STRN, IL15, TGFB1, SHH, TGFB2, FNTB, BDNF, CDKN2A, CDKN2B, CDKN2C, RARB, CUL1, LBX1, CGRRF1, PTPRU, VASH1, SSTR2, MSX1, NME1, WFDC1, ADAMTS1, ATPIF1, RBP4, CAV1, ERBB2, TIMP2, SESN1, FTH1, VDR, OVOL2, NPM1, BMP4, TP53I11, MLL, TAF6, BECN1, TGFBR2, KLF11, WDR6, NDFIP1, S100A11, SKI, SMAD1, GAS1, TAX1BP3, CDKN1C, CDKN1A, ETS1, CD274, GLMN, PRKRIR, KLF4, DLEC1, I…	2906	361	13528	1.3669	0.825205	0.0146722	0.656957
GOTERM_BP_FAT	GO:0007409~axonogenesis	63	1.73029	0.000349995	NRP2, UCHL1, SHH, APP, BDNF, POU4F3, POU4F2, POU4F1, SEMA3B, SEMA3A, TOP2B, RPS27A, EFNB3, BAIAP2, STXBP1, TBCE, VAX2, TBR1, CDK5, SLIT1, VASP, SLIT3, SLITRK1, SLITRK3, NDEL1, SIAH1, UBB, SLITRK5, C1ORF187, LPPR4, ERBB2, EPHB3, MYCBP2, EPHB2, ALCAM, HOXA1, IGF1R, LAMB2, BCL2, NUMB, B3GNT1, GBX2, RTN4RL2, NEFL, ETV4, APC, ACTB, PTPRZ1, SPTBN4, MAP1B, RTN4R, NFASC, GAS1, ISL1, EPHA4, EPHA7, ULK1, U…	2906	193	13528	1.51957	0.82869	0.0147165	0.664518
GOTERM_BP_FAT	GO:0043627~response to estrogen stimulus	39	1.07113	0.000374311	DHH, CAV1, SLC6A1, LDLR, PTGS2, PDGFB, LEPR, TIMP3, SHH, TGFB1, CASP6, ALDH1A2, BCL2, GATA3, ENO2, RARA, ANGPT1, NKX2-5, CCNA2, GHR, IHH, TXNIP, BMP4, SOCS2, STRN3, MAP1B, SOCS1, TGFBR2, ESR1, PTPRN, BRCA1, STAT3, MAPK1, CCND1, DUSP1, CCND2, SLC25A36, ARSA, WFDC1	2906	105	13528	1.72907	0.848456	0.015601	0.710531
GOTERM_BP_FAT	GO:0060284~regulation of cell development	66	1.81269	0.00038292	XRCC4, NBN, STAR, EFNA1, EDN1, XRCC6, REST, SHH, TGFB1, TTL, TGFB2, ACTR3, CASP6, BDNF, MAPT, SEMA3F, CDK5RAP2, SEMA3A, CDK5RAP1, RPS27A, ASPM, LBX1, ARHGEF1, BARHL2, TP53, LIG4, HES1, SMO, EYA1, NDEL1, CCND2, TGIF2, UBB, DBN1, TNFRSF12A, SOX2, SOX5, CDH2, TIMP2, CALR, EPHB2, BCL2, NUMB, TLX3, NEFL, NKX2-5, BMP4, TBX3, MAP1B, RTN4R, SMAD1, NEUROG3, ISL1, NKX6-1, DLX2, RNF6, YWHAH, ULK1, BAX, NEUR…	2906	205	13528	1.49875	0.854894	0.0158262	0.726816
GOTERM_BP_FAT	GO:0000079~regulation of cyclin-dependent protein kinase activity	24	0.65916	0.000384059	CCNT2, ANAPC2, PIM1, BCCIP, CDK7, CDKN3, LATS1, CDC37, CCNE2, CDKN1C, MEN1, CCND1, CDKN1A, CDKN2A, CDKN2B, HEXIM2, CCND2, CDKN2C, CKS2, ADAM17, CDK5RAP1, GADD45A, SERTAD1, APC	2906	54	13528	2.06898	0.855724	0.0157439	0.728971
GOTERM_BP_FAT	GO:0009083~branched chain family amino acid catabolic process	9	0.247185	0.000393632	ALDH6A1, MCCC2, BCKDK, BCAT2, MCCC1, BCKDHB, ACAD8, HIBCH, AUH	2906	11	13528	3.8088	0.862522	0.016003	0.747075
GOTERM_BP_FAT	GO:0045786~negative regulation of cell cycle	32	0.878879	0.00041619	ILKAP, SIPA1, LATS1, TGFB1, MEN1, CDKN2A, HEXIM2, BCL2, FAM5C, BCL6, CDK5RAP1, DLG1, APC, BMP4, FAM5B, CREB3, TAF6, TP53, CDK6, CENPE, GAS1, CDK5, ATM, CDKN1A, MAD2L1, PRDM4, ETS1, BTG4, PPP1R13B, DCUN1D3, MAD2L2, SMARCA4	2906	81	13528	1.83909	0.877303	0.0167773	0.789728
GOTERM_BP_FAT	GO:0008104~protein localization	231	6.34441	0.000435046	RAB3GAP2, CHMP6, SLC9A2, LHCGR, AURKB, VPS33B, VPS33A, SSR1, HOOK3, HOOK1, HOMER3, RAB23, RPL11, VPS13A, RAB26, VPS13B, NUP35, RAB20, GRIN2A, AP4M1, PTPRU, YIF1A, MAPK1, BACE2, PEX26, RAB13, MRPL45, NUP43, PALM, NFKBIE, CACNB1, NFKBIA, ARF6, PPT1, RFFL, CALR, CDC37, CD74, STX12, STX17, TMED10, SUPT7L, STX11, STX10, SRP54, RASEF, RAB7L1, GGN, RABEP1, ARF3, ARF4, PCNA, GOSR2, GOSR1, LGTN, AP1B1, PD…	2906	882	13528	1.21922	0.888431	0.0173919	0.825368
GOTERM_BP_FAT	GO:0006396~RNA processing	151	4.14721	0.000458369	RALY, EIF2C2, CHERP, RBM15B, U2AF2, LSM6, RBM5, SNRPD1, SART3, PNN, SFRS4, APP, DDX17, SFRS5, CDKN2A, RBM8A, TARDBP, U2AF1, SRRM1, RPL11, PTBP2, LSM2, DHX35, LSM1, MTO1, CCAR1, SNRPA1, RPL35A, EFTUD2, AARS, SFRS1, CSTF2T, SFRS3, RSL1D1, RPS19, RPS16, RPS14, SNRPB, SNRPE, XRN2, SNRPG, CPSF3L, ZC3H3, ELAC1, ELAC2, PUS1, STRAP, NHP2L1, FARS2, SNRPB2, ZCRB1, DUSP11, BOP1, SFRS16, AGGF1, RPL7, CDC40, …	2906	547	13528	1.28507	0.900809	0.0181718	0.869433
GOTERM_BP_FAT	GO:0048736~appendage development	38	1.04367	0.000523818	HOXA13, FGF9, GNA12, HOXD12, COL2A1, ZBTB16, PRRX2, GREM1, GLI3, SHH, ALDH1A2, RAB23, HOXA9, FBN2, RARB, ALX4, PCSK5, TWIST1, IDUA, RAX, TBX3, TBX5, SKI, EN1, GAS1, HOXD9, MSX1, TULP3, MEOX2, DLX5, BAX, LRP6, PBX1, GNAS, PBX2, LRP5, BMPR1A, SMARCA4	2906	103	13528	1.71745	0.928691	0.0205785	0.992991
GOTERM_BP_FAT	GO:0060173~limb development	38	1.04367	0.000523818	HOXA13, FGF9, GNA12, HOXD12, COL2A1, ZBTB16, PRRX2, GREM1, GLI3, SHH, ALDH1A2, RAB23, HOXA9, FBN2, RARB, ALX4, PCSK5, TWIST1, IDUA, RAX, TBX3, TBX5, SKI, EN1, GAS1, HOXD9, MSX1, TULP3, MEOX2, DLX5, BAX, LRP6, PBX1, GNAS, PBX2, LRP5, BMPR1A, SMARCA4	2906	103	13528	1.71745	0.928691	0.0205785	0.992991
GOTERM_BP_FAT	GO:0043085~positive regulation of catalytic activity	144	3.95496	0.000539663	XRCC4, PDGFB, EFNA1, BTRC, ADCY6, LHCGR, EDN1, TLR6, TGFB1, TGFB2, PRKAR2B, MAP3K6, MAP3K5, PRKAR2A, CDKN2A, CHRNA7, PDGFC, PRKACB, GNG3, CUL1, MAP2K6, RPS27A, SYK, ANAPC2, MADD, PIM1, BCL2L13, PSMA2, SPAG9, MAP4K5, NDEL1, PSMA5, HTR7, PSMA3, CAV1, FZR1, GNAI2, ADCYAP1R1, ERBB2, PFKFB2, MAP4K1, ANAPC11, CD74, PIN1, SLC11A2, VDR, PSMB7, PSMB6, KRAS, P2RY2, MTCH1, NPM1, FBXO5, TRAF6, HIP1, CARD8, S…	2906	520	13528	1.28913	0.934167	0.0210307	1.02288
GOTERM_BP_FAT	GO:0009314~response to radiation	64	1.75776	0.00056645	XRCC4, HMGCR, COPS3, XRCC6, TGFB1, MEN1, CASP6, FOS, GPX1, SLC1A2, APP, CASP9, MC1R, NR2F6, H2AFX, FANCG, MYC, FECH, POLH, TP53, GRIN2A, LIG4, CDK5, JUNB, C9ORF80, SAG, EYA3, XPA, PNKP, PPM1D, EYA1, CCND1, XPC, FANCD2, IL12A, DCUN1D3, RBP4, CAV1, HUS1, BCL2L1, ERCC8, KRAS, ERCC6, BCL2, ERCC4, ERCC1, FEN1, NPHP1, MSH6, TRPC3, MAT2A, MSH2, ATP1A3, SNAI2, RAD54L, BRCA1, ATM, SOD2, OBFC2B, CDKN1A, DU…	2906	200	13528	1.48966	0.942485	0.0218941	1.07339
GOTERM_BP_FAT	GO:0006302~double-strand break repair	26	0.71409	0.000593729	XRCC4, NBN, XRCC6, HUS1, MLH1, H2AFX, ERCC4, FEN1, ERCC1, CIB1, RAD51AP1, MSH2, TP53, APTX, BRIP1, LIG4, RAD54L, BRCA1, RAD51, SOD2, UBE2N, OBFC2B, EYA3, RECQL, EYA1, BTBD12	2906	62	13528	1.95218	0.949877	0.0227622	1.12481
GOTERM_BP_FAT	GO:0006468~protein amino acid phosphorylation	179	4.91623	0.00062534	NRBP1, EFNA1, STK35, PASK, RPS6KB1, AURKB, TGFB1, TGFB2, CSNK2A2, MAP3K6, MAP3K5, APP, CSNK2A1, PSKH1, COL4A3BP, PIK3C3, CLK4, MAP3K8, PIK3CA, CHRNA7, STK39, GNG3, TLK2, PRKACB, MAP2K6, SYK, MATK, PIK3CG, TYRO3, RET, BCR, MYO3A, STK25, BRAF, MADD, PIK3CD, WNK1, PIM1, RPS6KC1, MARK3, STK4, CDKL2, WEE1, STK3, SPAG9, MAPK1, MAP4K5, CDKL1, SCYL1, MAPK6, ROR1, BMP2K, RIPK3, TESK1, RIPK2, TESK2, NEK4, …	2906	667	13528	1.2493	0.957263	0.0237791	1.18436
GOTERM_BP_FAT	GO:0003002~regionalization	63	1.73029	0.00063976	EDN1, GLI3, SHH, GLI1, HOXC8, WNT3, PROP1, PAX7, HOXC4, GATA4, HOXC5, RAB23, ALX4, GSC, OTX1, YY1, EMX2, RING1, VAX2, HOXD9, HES1, CTNNBIP1, SMO, HHEX, EP300, HIPK1, HOXD4, BMPR2, CXXC4, ZBTB16, GREM1, ALDH1A2, HOXA1, OVOL2, GBX2, HOXA9, PCSK5, APC, MLLT3, BMP4, MLL, LMX1B, TBX3, SMAD6, EN1, GAS1, NKX6-1, ATM, HOXB4, DLX2, TULP3, HOXB7, MEOX2, SFRP1, SFRP2, HOXB5, LRP6, NEUROD1, PBX1, PBX2, CHRD,…	2906	197	13528	1.48872	0.960261	0.0241389	1.21151
GOTERM_BP_FAT	GO:0006418~tRNA aminoacylation for protein translation	21	0.576765	0.000659854	CARS, ZNFX1, FARS2, AARS, GARS, DALRD3, EPRS, WARS2, QARS, DARS2, IARS2, AARSD1, VARS, IARS, WARS, TARS, PARS2, RARS, HARS2, TARSL2, MARS	2906	46	13528	2.1252	0.964091	0.024703	1.24934
GOTERM_BP_FAT	GO:0043039~tRNA aminoacylation	21	0.576765	0.000659854	CARS, ZNFX1, FARS2, AARS, GARS, DALRD3, EPRS, WARS2, QARS, DARS2, IARS2, AARSD1, VARS, IARS, WARS, TARS, PARS2, RARS, HARS2, TARSL2, MARS	2906	46	13528	2.1252	0.964091	0.024703	1.24934
GOTERM_BP_FAT	GO:0043038~amino acid activation	21	0.576765	0.000659854	CARS, ZNFX1, FARS2, AARS, GARS, DALRD3, EPRS, WARS2, QARS, DARS2, IARS2, AARSD1, VARS, IARS, WARS, TARS, PARS2, RARS, HARS2, TARSL2, MARS	2906	46	13528	2.1252	0.964091	0.024703	1.24934
GOTERM_BP_FAT	GO:0007346~regulation of mitotic cell cycle	51	1.40071	0.000688347	MAD1L1, NBN, ILKAP, MAEA, EDN1, TGFB1, APP, CDKN2A, CDKN2B, PRMT5, TGFA, CCNA2, MYC, DLG1, CYP1A1, TP53, NUSAP1, CDK2, PRKCQ, CCND1, MAD2L1, BTG4, MAD2L2, CHFR, DCUN1D3, NEK6, SMARCA4, HOXA13, NEK2, HUS1, ASNS, TRRAP, ZNF655, RCC1, MYCBP2, PIN1, C12ORF11, BCL2, FBXO5, THAP1, BCL6, ZWILCH, BUB3, APC, SMAD6, SPHK1, NEUROG1, CENPE, GAS1, SIRT2, ATM	2906	152	13528	1.56194	0.968897	0.0255665	1.30295
GOTERM_BP_FAT	GO:0033273~response to vitamin	27	0.741555	0.000709648	RBP4, CYP24A1, KYNU, PTGS2, IGFBP7, SOX2, TIMP3, TGFB1, SHH, VDR, ALDH1A2, MLL5, CD44, BCL2, RARA, ANGPT1, MUC1, BMP4, SP100, CYP1A1, MAP1B, CCND1, DUSP1, C14ORF104, OVCA2, LRP2, KLF4	2906	66	13528	1.9044	0.972066	0.0261548	1.34301
GOTERM_BP_FAT	GO:0007423~sensory organ development	71	1.95001	0.000744195	FGF9, EDN1, MITF, PRRX2, GLI3, SHH, TGFB1, TGFB2, CASP6, BDNF, KCNQ4, MCOLN3, POU4F3, POU4F2, RARB, MYC, MYO6, GSC, RAX, CYP1A1, OTX1, YY1, RING1, PRKCI, VAX2, SIX4, HES1, EYA1, NRL, GAA, TGIF2, RBP4, TWSG1, BBS4, IRX5, ERBB2, SOX2, NFYC, COL2A1, EPHB2, ALDH1A2, HOXA1, MEIS2, BLOC1S3, ALDH1A3, BCL2, GBX2, GFI1, NKX2-5, APC, MAF, BMP4, DFNA5, FOXL2, LMX1B, NEUROG1, FZD3, GAS1, STAT3, TULP3, SP1, S…	2906	229	13528	1.44331	0.976533	0.0272122	1.40796
GOTERM_BP_FAT	GO:0046661~male sex differentiation	29	0.796484	0.000744782	RBP4, DHH, HMGB2, HOXA13, FGF9, FKBP4, SOX2, ZFP42, LHCGR, BCL2L1, SHH, BCL2, CSDE1, HSD17B4, LHX9, FNDC3A, ERCC1, UTF1, TBX3, MSH2, MEA1, SMAD5, SF1, SDC1, CCND1, NCOA4, BAX, BIK, BMPR1A	2906	73	13528	1.84932	0.976602	0.0270373	1.40906
GOTERM_BP_FAT	GO:0022411~cellular component disassembly	23	0.631695	0.000781004	FOXL2, MTERF, BNIP3, TTF1, PPT1, ETF1, MRRF, MTIF3, TTF2, TXNDC12, KIF2C, MOAP1, CDKN2A, MAZ, SET, NDEL1, SMARCE1, BAX, MTRF1, SUPT16H, APAF1, MYC, XRN2	2906	53	13528	2.02018	0.980509	0.0281315	1.47711
GOTERM_BP_FAT	GO:0048858~cell projection morphogenesis	75	2.05987	0.000781109	NRP2, UCHL1, RAB3IP, SHH, BDNF, APP, POU4F3, MKKS, POU4F2, SEMA3B, POU4F1, SEMA3A, TOP2B, RPS27A, EFNB3, BAIAP2, STXBP1, TBCE, VAX2, ARL6, PCM1, TBR1, CDK5, SLIT1, VASP, SLIT3, SMO, SLITRK1, SLITRK3, NDEL1, SIAH1, UBB, SLITRK5, C1ORF187, BBS4, BBS5, LPPR4, ERBB2, TTC8, EPHB3, MYCBP2, EPHB2, ALCAM, HOXA1, IGF1R, LAMB2, BCL2, NUMB, B3GNT1, GBX2, RTN4RL2, NEFL, ETV4, APC, ACTB, PTPRZ1, SPTBN4, MAP1B…	2906	245	13528	1.42506	0.980519	0.0279357	1.4773
GOTERM_BP_FAT	GO:0022403~cell cycle phase	117	3.2134	0.000832803	PRC1, TUBB2A, AURKB, PTTG1, CD2AP, APP, CDKN2A, MC1R, CDKN2B, CDKN2C, TARDBP, H2AFX, CCNA2, ASPM, CUL1, STAG1, ANAPC2, SGOL1, PIM1, TBRG4, UBR2, DCTN3, WEE1, DCTN2, MAD2L1, RCC2, SPAG5, C14ORF106, AKAP8, NEK4, MAD2L2, NUP43, NEK6, PPP5C, FZR1, NEK2, NEDD9, ANAPC11, RCC1, NIPBL, RAD51L1, KATNA1, OVOL1, FBXO5, CLASP2, NUDC, SSSCA1, CDC20, TPD52L1, SUGT1, CDC26, RAD54L, CDC27, ATM, CDKN1C, NEDD1, CD…	2906	414	13528	1.3156	0.984991	0.029548	1.57434
GOTERM_BP_FAT	GO:0048706~embryonic skeletal system development	30	0.823949	0.000853342	RBP4, FGF9, COL2A1, DLK1, PRRX2, GLI3, SHH, MEN1, PAX7, HOXC5, HOXA9, ALX4, PCSK5, GSC, TGFBR2, HSPG2, GAS1, SIX4, HOXD9, DLX2, HOXB4, EYA1, TULP3, HOXB7, SP1, HOXB5, SP3, HOXD4, PBX1, GNAS	2906	77	13528	1.81371	0.986468	0.0300546	1.61287
GOTERM_BP_FAT	GO:0030902~hindbrain development	25	0.686625	0.00086893	RORA, SHH, GLI1, HOXA1, ALDH1A2, BCL2, GBX2, LHX5, POU4F1, PHOX2A, LMX1B, EN1, EN2, SMAD1, GAS1, TBR1, CDK5, HES1, SMO, ULK1, NEUROD1, CACNA1A, SMARCA4, MYH10, NFIB	2906	60	13528	1.93967	0.987491	0.0303832	1.6421
GOTERM_BP_FAT	GO:0048566~embryonic gut development	9	0.247185	0.000957988	ALDH1A2, OVOL2, FGF9, FOXF1, FOXF2, GATA4, PCSK5, GLI3, ADA	2906	12	13528	3.4914	0.992018	0.033216	1.80895
GOTERM_BP_FAT	GO:0002208~somatic diversification of immunoglobulins during immune response	9	0.247185	0.000957988	EXO1, XRCC4, MSH6, NBN, MSH2, MLH1, LIG4, HSPD1, ERCC1	2906	12	13528	3.4914	0.992018	0.033216	1.80895
GOTERM_BP_FAT	GO:0002204~somatic recombination of immunoglobulin genes during immune response	9	0.247185	0.000957988	EXO1, XRCC4, MSH6, NBN, MSH2, MLH1, LIG4, HSPD1, ERCC1	2906	12	13528	3.4914	0.992018	0.033216	1.80895
GOTERM_BP_FAT	GO:0045190~isotype switching	9	0.247185	0.000957988	EXO1, XRCC4, MSH6, NBN, MSH2, MLH1, LIG4, HSPD1, ERCC1	2906	12	13528	3.4914	0.992018	0.033216	1.80895
GOTERM_BP_FAT	GO:0015031~protein transport	200	5.493	0.000969293	RAB3GAP2, CHMP6, LHCGR, VPS33B, VPS33A, SSR1, HOOK3, HOOK1, HOMER3, RAB23, RPL11, VPS13A, VPS13B, RAB26, NUP35, RAB20, AP4M1, YIF1A, MAPK1, BACE2, PEX26, RAB13, MRPL45, NUP43, CACNB1, NFKBIA, ARF6, PPT1, RFFL, CALR, CDC37, CD74, STX12, STX17, TMED10, STX11, STX10, SRP54, RASEF, RAB7L1, RABEP1, ARF3, ARF4, PCNA, GOSR2, LGTN, GOSR1, PDIA3, AP1B1, FGF9, AP2S1, VPS37B, GLI3, CANX, COPB2, AP1S1, AP2B1…	2906	762	13528	1.22184	0.992461	0.0333722	1.83011
GOTERM_BP_FAT	GO:0035107~appendage morphogenesis	36	0.988739	0.00101734	HOXA13, FGF9, GNA12, HOXD12, COL2A1, ZBTB16, PRRX2, GREM1, GLI3, SHH, ALDH1A2, RAB23, HOXA9, FBN2, RARB, ALX4, PCSK5, TWIST1, IDUA, TBX3, TBX5, SKI, EN1, GAS1, HOXD9, MSX1, TULP3, DLX5, BAX, LRP6, PBX1, GNAS, PBX2, LRP5, BMPR1A, SMARCA4	2906	99	13528	1.6928	0.994083	0.0347608	1.91999
GOTERM_BP_FAT	GO:0035108~limb morphogenesis	36	0.988739	0.00101734	HOXA13, FGF9, GNA12, HOXD12, COL2A1, ZBTB16, PRRX2, GREM1, GLI3, SHH, ALDH1A2, RAB23, HOXA9, FBN2, RARB, ALX4, PCSK5, TWIST1, IDUA, TBX3, TBX5, SKI, EN1, GAS1, HOXD9, MSX1, TULP3, DLX5, BAX, LRP6, PBX1, GNAS, PBX2, LRP5, BMPR1A, SMARCA4	2906	99	13528	1.6928	0.994083	0.0347608	1.91999
GOTERM_BP_FAT	GO:0031175~neuron projection development	77	2.1148	0.0011501	NRP2, UCHL1, STRN, GRIN3A, SHH, EFHD1, BDNF, APP, CD44, POU4F3, POU4F2, SEMA3B, POU4F1, SEMA3A, TOP2B, RPS27A, SS18L1, MYO6, STMN3, EFNB3, BAIAP2, STXBP1, TBCE, VAX2, TBR1, CDK5, SLIT1, VASP, SLIT3, SMO, SLITRK1, SLITRK3, NDEL1, SIAH1, UBB, SLITRK5, IGSF9, C1ORF187, BBS4, LPPR4, ERBB2, CDH1, EPHB3, MYCBP2, EPHB2, ALCAM, HOXA1, IGF1R, LAMB2, BCL2, NUMB, B3GNT1, GBX2, RTN4RL2, NEFL, ETV4, APC, ACTB…	2906	256	13528	1.4002	0.996972	0.0389461	2.16795
GOTERM_BP_FAT	GO:0045184~establishment of protein localization	201	5.52046	0.00115546	RAB3GAP2, CHMP6, LHCGR, VPS33B, VPS33A, SSR1, HOOK3, HOOK1, HOMER3, RAB23, RPL11, VPS13A, VPS13B, RAB26, NUP35, RAB20, AP4M1, YIF1A, MAPK1, BACE2, PEX26, RAB13, MRPL45, NUP43, CACNB1, NFKBIA, ARF6, PPT1, RFFL, CALR, CDC37, CD74, STX12, STX17, TMED10, STX11, STX10, SRP54, RASEF, RAB7L1, RABEP1, ARF3, ARF4, PCNA, GOSR2, LGTN, GOSR1, PDIA3, AP1B1, FGF9, AP2S1, VPS37B, GLI3, CANX, COPB2, AP1S1, AP2B1…	2906	769	13528	1.21677	0.997053	0.0388635	2.17796
GOTERM_BP_FAT	GO:0010332~response to gamma radiation	13	0.357045	0.00115788	XRCC4, CAV1, TP53, LIG4, SOD2, MEN1, GPX1, CASP6, ERCC6, FANCD2, BAX, BCL2, DCUN1D3	2906	23	13528	2.6312	0.997089	0.0386853	2.18247
GOTERM_BP_FAT	GO:0048667~cell morphogenesis involved in neuron differentiation	65	1.78522	0.00116429	NRP2, UCHL1, SHH, APP, BDNF, POU4F3, POU4F2, POU4F1, SEMA3B, SEMA3A, TOP2B, RPS27A, EFNB3, BAIAP2, STXBP1, TBCE, VAX2, TBR1, CDK5, SLIT1, VASP, SLIT3, HES1, SLITRK1, SLITRK3, NDEL1, SIAH1, UBB, SLITRK5, C1ORF187, LPPR4, ERBB2, EPHB3, MYCBP2, EPHB2, ALCAM, HOXA1, IGF1R, LAMB2, BCL2, NUMB, B3GNT1, GBX2, RTN4RL2, NEFL, ETV4, APC, ACTB, PTPRZ1, SPTBN4, MAP1B, RTN4R, NFASC, GAS1, ISL1, EPHA4, EPHA7, U…	2906	209	13528	1.44779	0.997181	0.0386393	2.19443
GOTERM_BP_FAT	GO:0048812~neuron projection morphogenesis	66	1.81269	0.00118084	NRP2, UCHL1, SHH, APP, BDNF, POU4F3, POU4F2, POU4F1, SEMA3B, SEMA3A, TOP2B, RPS27A, EFNB3, BAIAP2, STXBP1, TBCE, VAX2, TBR1, CDK5, SLIT1, VASP, SLIT3, SMO, SLITRK1, SLITRK3, NDEL1, SIAH1, UBB, SLITRK5, C1ORF187, LPPR4, ERBB2, EPHB3, MYCBP2, EPHB2, ALCAM, HOXA1, IGF1R, LAMB2, BCL2, NUMB, B3GNT1, GBX2, RTN4RL2, NEFL, ETV4, APC, ACTB, PTPRZ1, SPTBN4, MAP1B, RTN4R, NFASC, GAS1, ISL1, GAS7, EPHA4, EPH…	2906	213	13528	1.44246	0.997407	0.0389221	2.22529
GOTERM_BP_FAT	GO:0016044~membrane organization	108	2.96622	0.00119192	AP1G1, SNCA, SYT7, ITSN2, VPS33B, ITSN1, MEGF10, GATA2, APP, PACSIN2, CLEC4F, TIMM9, DNAJC6, IZUMO1, SCAMP1, MYO6, TIMM8B, NPC1, NDEL1, ARRB2, VAMP8, NME1, TXNDC5, CATSPER1, ARFGAP1, CAV1, STX7, GNAI3, COPZ1, SNX1, PPT1, BCL2L1, SNX3, FTH1, KRAS, BLOC1S3, ITGAV, MTCH1, DULLARD, STX11, HIP1, RABIF, TGFBR2, CORO1C, CORO1A, RABEP1, ULK1, GRK4, GOSR2, CHRNB1, SYT17, MYH10, CLTA, LDLR, AP1B1, ATP5B, A…	2906	381	13528	1.31958	0.997548	0.0390253	2.24595
GOTERM_BP_FAT	GO:0021915~neural tube development	27	0.741555	0.00119701	BBS4, PTK7, PAX3, TCF7L2, GLI3, SHH, PFN1, ALDH1A2, OVOL2, PAX7, CASP8, GBX2, TRAF6, IPMK, TWIST1, BMP4, GSC, EN1, FZD3, CELSR1, GAS1, VASP, HES1, SMO, TULP3, APAF1, CHRD	2906	68	13528	1.84839	0.99761	0.0389357	2.25542
GOTERM_BP_FAT	GO:0006260~DNA replication	60	1.6479	0.00122664	CLSPN, FHIT, PDGFB, C8ORF45, TERF2IP, PRIM1, CCNE2, ORC4L, CTGF, TOP2A, CDC7, POLH, SSBP1, LIG1, RAD9A, POLB, LIG4, ORC1L, CDK2, RAD51, RFC5, PNKP, RFC4, RFC1, RFC2, RRM2, RRM1, NCOA6, CDK2AP1, TNFAIP1, TOP3B, ING4, HMGB2, ACHE, HUS1, NFIX, RRM2B, POLA2, TFAM, RPA2, TYMS, ORC2L, SET, TERF2, FEN1, SSRP1, CINP, SPHAR, BRCA1, POLD3, POLD4, HELB, POLD1, POLD2, PCNA, SUPT16H, KCTD13, NFIA, NFIB, DUT	2906	190	13528	1.47006	0.997942	0.0396253	2.31065
GOTERM_BP_FAT	GO:0032870~cellular response to hormone stimulus	45	1.23592	0.00122728	STAR, IGFBP7, ADCY6, LHCGR, PDE3B, RHOQ, RPS6KB1, GNG12, LATS1, SLC2A8, IGF1R, PRKAR2B, FOS, EIF4EBP1, PRKAR2A, GOT1, SORBS1, PCSK9, SHC1, GNG3, PRKACB, GNG4, GHR, SOCS2, PTPN2, BAIAP2, FBP1, PRKCI, ADIPOR1, STAT1, LPIN1, JUNB, STAT3, GRB10, GNB2, DUSP1, CCND2, GSK3A, GNB1, PRKAR1B, PRKAR1A, GNAS, GNB4, HDAC9, VLDLR	2906	133	13528	1.57507	0.997949	0.0393934	2.31185
GOTERM_BP_FAT	GO:0046546~development of primary male sexual characteristics	26	0.71409	0.00133748	RBP4, DHH, HMGB2, HOXA13, FGF9, ZFP42, LHCGR, SOX2, BCL2L1, SHH, BCL2, CSDE1, HSD17B4, LHX9, FNDC3A, ERCC1, UTF1, TBX3, MSH2, MEA1, SF1, SDC1, CCND1, NCOA4, BAX, BIK	2906	65	13528	1.86208	0.998824	0.0425853	2.51692
GOTERM_BP_FAT	GO:0001701~in utero embryonic development	56	1.53804	0.0015006	XRCC4, NBN, CDX2, COPS3, GNA12, EDN1, GLI3, YBX1, ACVR1B, GATA2, PRMT1, GATA6, FOXF1, COL4A3BP, GATA4, ANKRD11, ADAM10, TP53, MBD3, LIG4, JUNB, HES1, NDEL1, MSX1, GRN, NCOA6, SMARCA4, SYVN1, ELL, KEAP1, CDH1, EGLN1, BCL2L1, SRF, ADA, LY6E, HAND2, SLC30A1, BTF3, PKD1, APBA1, TERF2, EPAS1, LMX1B, TBX3, MSH2, NMT1, PLK4, TULP3, CCNB2, SP1, PSMC4, PSMC3, SP3, MAPK8IP3, MYH10	2906	176	13528	1.4812	0.999484	0.0473591	2.81975
GOTERM_BP_FAT	GO:0008584~male gonad development	22	0.60423	0.00155086	RBP4, DHH, UTF1, HMGB2, MSH2, FGF9, LHCGR, ZFP42, MEA1, SF1, BCL2L1, SDC1, CCND1, NCOA4, BAX, BCL2, CSDE1, BIK, HSD17B4, FNDC3A, LHX9, ERCC1	2906	52	13528	1.96951	0.999599	0.0486034	2.91288
GOTERM_BP_FAT	GO:0051291~protein heterooligomerization	22	0.60423	0.00155086	KCND2, SCUBE3, BRAF, VHL, PRKAG1, ALDOC, IDE, YWHAB, PRKAB1, SKI, FADD, CDH2, BIRC3, BIRC2, GCH1, IGF1R, UQCRH, CASP8, PRKAA2, SKIL, GCHFR, PPP5C	2906	52	13528	1.96951	0.999599	0.0486034	2.91288
GOTERM_BP_FAT	GO:0051053~negative regulation of DNA metabolic process	18	0.49437	0.00159061	MSH6, NF2, MSH2, HUS1, S100A11, NDFIP1, TP53, MLH1, TTF1, RAD9A, TERF2IP, TGFB1, RPS3, BCL6, ERCC4, TINF2, ERCC1, TERF2	2906	39	13528	2.14855	0.999672	0.0495113	2.98648
GOTERM_BP_FAT	GO:0016447~somatic recombination of immunoglobulin gene segments	11	0.302115	0.00161706	EXO1, XRCC4, MSH6, NBN, MSH2, MLH1, PMS2, LIG4, HSPD1, ERCC1, FOXP1	2906	18	13528	2.84484	0.999713	0.0500057	3.03542
GOTERM_BP_FAT	GO:0007389~pattern specification process	79	2.16973	0.00164333	CDX2, EDN1, HOXD12, ALG5, GLI3, SHH, GLI1, HOXC8, WNT3, PROP1, PAX7, FOXF1, HOXC4, GATA4, HOXC5, RAB23, MKKS, ALX4, CYR61, IHH, GSC, RAX, OTX1, YY1, EMX2, RING1, VAX2, ARL6, HOXD9, CTNNBIP1, HES1, SMO, HHEX, EYA1, EP300, HIPK1, HOXD4, BMPR2, CXXC4, TTC8, ZBTB16, GREM1, ALDH1A2, HOXA1, OVOL2, GBX2, HOXA9, PCSK5, MLLT3, APC, BMP4, KIF3B, MLL, LMX1B, TBX3, TBX5, SMAD6, TGFBR2, SMAD5, EN1, SMAD1, GAS…	2906	267	13528	1.37738	0.999749	0.0504883	3.08399
GOTERM_BP_FAT	GO:0032535~regulation of cellular component size	80	2.1972	0.00164464	LIMA1, PDGFB, CAPZA2, EDN1, LATS1, VILL, TGFB1, TGFB2, DSTN, ACTR3, ACVR1B, APP, ARHGAP5, CDKN2A, CDKN2C, SEMA3F, MAPT, POU4F3, SERTAD3, POU4F2, GDF9, SEMA3A, GNG4, SERTAD1, SERTAD2, DEPDC6, PPP2R1A, CGRRF1, ADAM10, TP53, SLC3A2, ADIPOR1, TMSB10, ESR2, ARPC1B, EP300, PRDM4, ARPC5L, NCK1, ADAM17, WFDC1, DCUN1D3, C6ORF108, ADD2, XRN2, DCBLD2, TNFRSF12A, ACTR3B, SIPA1, PPT1, RDX, ARF6, ARPC5, GREM1,…	2906	271	13528	1.37423	0.99975	0.0502216	3.08641
GOTERM_BP_FAT	GO:0009411~response to UV	24	0.65916	0.00166365	MSH6, FECH, POLH, MSH2, HUS1, TP53, MEN1, ERCC8, GPX1, XPA, CDKN1A, CCND1, ERCC6, XPC, MC1R, CASP9, POLD1, BAX, BCL2, IL12A, DCUN1D3, ERCC4, FEN1, ERCC1	2906	59	13528	1.89364	0.999773	0.0504822	3.12155
GOTERM_BP_FAT	GO:0035295~tube development	67	1.84015	0.00175707	FGF9, EDN1, PAX3, GLI3, SHH, GLI1, BDNF, SPRY1, CD44, CTGF, GATA6, FOXF1, GATA4, CASP8, MKKS, LOX, RARB, IPMK, TWIST1, IHH, CYR61, RET, LBX1, VASP, HES1, HHEX, EYA1, PPP1CA, EP300, ADAMTS2, RBP4, BBS4, BBS5, CLCN2, PTK7, BMPR2, HOXB13, GREM1, SRF, ADA, PFN1, ALDH1A2, OVOL2, HAND2, BCL2, GBX2, TRAF6, NKX2-5, PCSK5, BMP4, LIPA, EPAS1, TBX3, TBX5, TGFBR2, FZD3, CELSR1, FOXP1, SP1, LAMA5, SALL1, SP3,…	2906	220	13528	1.41772	0.999859	0.0529248	3.29407
GOTERM_BP_FAT	GO:0006266~DNA ligation	7	0.192255	0.00182371	XRCC4, HMGB2, XRCC6, MGMT, APTX, LIG4, TOP2A	2906	8	13528	4.0733	0.999899	0.0545523	3.41696
GOTERM_BP_FAT	GO:0043549~regulation of kinase activity	101	2.77396	0.0018511	PDGFB, EFNA1, HMGCR, ADCY6, EDN1, MBIP, TLR6, TGFB1, TGFB2, ZGPAT, MAP3K6, PRKAR2B, MAP3K5, PRKAR2A, APP, CDKN2A, CDKN2B, CDKN2C, PDGFC, CHRNA7, PRKACB, GNG3, MAP2K6, SYK, DEPDC6, ANAPC2, RBL2, MADD, PIM1, PKIB, SPAG9, MAP4K5, CAV1, GNAI2, ERBB2, PFKFB2, MAP4K1, CDC37, CD74, KRAS, HEXIM2, NPM1, TRAF6, SPHK2, SPHK1, TGFBR2, CDKN1C, CDKN1A, PRKAR1B, RGS4, PRKAR1A, CCNT2, PRKAG1, PRKAG2, PRDX3, SDC4…	2906	357	13528	1.31702	0.999912	0.0550233	3.46743
GOTERM_BP_FAT	GO:0016444~somatic cell DNA recombination	13	0.357045	0.00186648	EXO1, MSH6, XRCC4, NBN, MSH2, LIG1, XRCC6, MLH1, LIG4, FOXP1, PMS2, HSPD1, ERCC1	2906	24	13528	2.52156	0.999919	0.0551434	3.49576
GOTERM_BP_FAT	GO:0002562~somatic diversification of immune receptors via germline recombination within a single locus	13	0.357045	0.00186648	EXO1, MSH6, XRCC4, NBN, MSH2, LIG1, XRCC6, MLH1, LIG4, FOXP1, PMS2, HSPD1, ERCC1	2906	24	13528	2.52156	0.999919	0.0551434	3.49576
GOTERM_BP_FAT	GO:0045859~regulation of protein kinase activity	98	2.69157	0.00189347	PDGFB, EFNA1, HMGCR, ADCY6, EDN1, MBIP, TLR6, TGFB1, TGFB2, ZGPAT, MAP3K6, PRKAR2B, PRKAR2A, APP, MAP3K5, CDKN2A, CDKN2B, CDKN2C, PDGFC, CHRNA7, PRKACB, GNG3, MAP2K6, SYK, DEPDC6, ANAPC2, MADD, PIM1, PKIB, SPAG9, MAP4K5, CAV1, GNAI2, ERBB2, MAP4K1, CDC37, CD74, KRAS, HEXIM2, NPM1, TRAF6, SPHK2, SPHK1, TGFBR2, CDKN1C, CDKN1A, PRKAR1B, RGS4, PRKAR1A, CCNT2, PRKAG1, PRKAG2, SDC4, DAXX, LATS1, MEN1, …	2906	345	13528	1.32235	0.999929	0.0555934	3.54545
GOTERM_BP_FAT	GO:0033043~regulation of organelle organization	66	1.81269	0.00197507	LIMA1, CAPZA2, SNCA, EDN1, RHOQ, CTCF, TERF2IP, LATS1, VILL, DSTN, ACTR3, MEN1, CEP250, MAPT, PRMT5, TGFA, TLK2, MYC, STMN3, NUSAP1, TMSB10, TNKS2, UBE2N, ARPC1B, PRKCQ, MAD2L1, ARPC5L, NCK1, MAD2L2, ADD2, NEK6, CAV1, HOXA13, NEK2, ACTR3B, RDX, ARF6, ARPC5, RCC1, MYCBP2, PIN1, PFN2, SET, ARPC2, NPM1, CLASP2, ERCC4, TINF2, RASA1, TERF2, ERCC1, APC, MLL, NF2, SPTBN4, MAP1B, PSRC1, MYO1F, CENPE, ATM…	2906	217	13528	1.41587	0.999953	0.0575861	3.69553
GOTERM_BP_FAT	GO:0016071~mRNA metabolic process	104	2.85636	0.00198484	RALY, EIF2C2, U2AF2, LSM6, RBM15B, RBM5, SNRPD1, PNN, APP, SFRS4, SFRS5, DNAJB11, RBM8A, TARDBP, U2AF1, SRRM1, PTBP2, LSM2, DHX35, LSM1, CCAR1, SNRPA1, EFTUD2, SFRS1, CSTF2T, SFRS3, SNRPB, SNRPE, XRN2, EIF2C3, SNRPG, ZC3H3, NHP2L1, STRAP, SNRPB2, IGF2BP1, ZCRB1, SFRS16, CDC40, PPIL3, SFRS14, SFRS11, DHX8, CSTF3, PAIP1, SMG7, SSB, SNW1, CASC3, PPIH, PNRC2, GTF2F1, POP4, MLH1, WBP4, YBX1, YBX2, RNG…	2906	370	13528	1.30849	0.999955	0.0575305	3.71349
GOTERM_BP_FAT	GO:0002381~immunoglobulin production during immune response	9	0.247185	0.00202213	EXO1, XRCC4, MSH6, NBN, MSH2, MLH1, LIG4, HSPD1, ERCC1	2906	13	13528	3.22283	0.999963	0.0582457	3.78199
GOTERM_BP_FAT	GO:0007162~negative regulation of cell adhesion	19	0.521835	0.00204375	ARHGDIG, ADAM10, NF2, ATP5B, SIPA1, MYO1F, PDE3B, CBLL1, FXYD5, CD164, TGFB1, CDH13, CDKN2A, RND1, B4GALNT2, BCL6, ADAM22, RASA1, ARHGDIB	2906	43	13528	2.05695	0.999967	0.0585165	3.82168
GOTERM_BP_FAT	GO:0030308~negative regulation of cell growth	33	0.906344	0.00221199	DCBLD2, SIPA1, PPT1, GREM1, TGFB1, TGFB2, ACVR1B, CDKN2A, CDKN2C, SEMA3F, BCL2, PPP2CA, SERTAD3, GDF9, BCL6, SEMA3A, GNG4, ING1, SERTAD1, SERTAD2, PPP2R1A, CGRRF1, IL7, PSRC1, TP53, ADIPOR1, ESR2, CDKN1A, RNF6, PRDM4, ULK1, WFDC1, DCUN1D3	2906	92	13528	1.6698	0.999986	0.0628277	4.13003
GOTERM_BP_FAT	GO:0030900~forebrain development	49	1.34578	0.00228222	E2F1, SLC6A4, GLI3, SHH, GLI1, GATA2, SLC1A2, APP, PROP1, HTRA2, MKKS, TOP2B, ASPM, NR2F1, GSC, RAX, OTX1, EMX2, CDK5, HES1, HHEX, EYA1, MSX1, GHRH, C1ORF187, SMARCA4, BBS4, TWSG1, SOX2, CDH1, APLP2, PCSK1, ALDH1A2, ALDH1A3, NUMB, POU3F3, PEX13, BMP4, GNAO1, TBX3, ISL1, DLX2, BAX, MAPK8IP3, APAF1, LRP2, CHRD, MYH10, NFIB	2906	152	13528	1.50069	0.99999	0.0643966	4.25847
GOTERM_BP_FAT	GO:0031401~positive regulation of protein modification process	58	1.59297	0.00235137	IL6ST, BTRC, PRKAG2, TGFB1, MEN1, PSMD1, PSMD2, PSMD3, PSMD7, PSMD8, RPS27A, CUL1, SYK, PSMD9, GHR, ANAPC2, UBE2N, PSMA2, CCND1, PIAS4, CCND2, PIAS3, PSMA5, PSMA3, IL12A, ADAM17, PIAS1, UBB, PSMB10, ATG10, FZR1, CAV1, BMPR2, ANAPC11, STUB1, PIN1, PSMB7, PSMB6, BCL2, RB1CC1, FBXO5, FBXO4, EPO, BMP4, NDFIP1, CDC20, CDC26, CDC27, BRCA1, PSMB8, PSMB9, PSMC6, PSMD14, PSMD12, PSMC4, PSMC3, PSMC1, BMPR1A	2906	187	13528	1.44386	0.999993	0.0659158	4.38478
GOTERM_BP_FAT	GO:0070647~protein modification by small protein conjugation or removal	51	1.40071	0.00239344	ENY2, DZIP3, COPS5, UCHL1, LMO7, SENP7, OS9, WWP1, FBXO24, USP16, RPS27A, DDB1, RING1, RBBP6, UBE2N, PIAS4, PIAS3, SIAH1, SIAH2, PAF1, UBB, CHFR, FBXO11, USP7, SUPT3H, ATG10, UBE3A, NEDD8, TRRAP, CBLL1, ANAPC11, STUB1, RBX1, SUMO3, SUMO2, ERCC8, FBXW7, FBXO4, FBXO3, TRAF6, USP33, VHL, CBL, TRIM23, BRCA1, PSMD14, RNF7, GSPT1, WDSUB1, ATXN7, RNF40, RNF41	2906	160	13528	1.48384	0.999994	0.0666861	4.46155
GOTERM_BP_FAT	GO:0006979~response to oxidative stress	52	1.42818	0.00244409	PTGS2, STAR, ATOX1, SNCA, PTGS1, PRDX3, PRDX1, GSS, CASP6, FOS, HMOX2, GPX1, MSRA, GPX3, FOSL1, OXR1, MB, STK25, APTX, NDUFA12, PNKP, PYCR1, XPA, SDC1, EP300, CA3, PRNP, RRM2B, BCL2L1, ADA, PXN, GLRX2, ANGPTL7, SLC11A2, ERCC8, ERCC6, BCL2, TOR1A, PPP2CB, KRT1, IDH1, ETV5, ERCC1, TXNIP, GNAO1, EPAS1, ATRN, SIRT7, STAT1, SOD2, DUSP1, UCP2	2906	164	13528	1.47604	0.999996	0.0676765	4.55389
GOTERM_BP_FAT	GO:0000902~cell morphogenesis	100	2.7465	0.00248202	TGFB1, SHH, TGFB2, BDNF, APP, COL4A3BP, FOXF1, GDF9, RPS27A, IDUA, EFNB3, BAIAP2, VAX2, PCM1, STK4, TBR1, HES1, SLITRK1, SLITRK3, NDEL1, SLITRK5, C1ORF187, BBS4, BBS5, LPPR4, SSH1, ERBB2, PTK7, TTC8, EPHB3, LLGL1, EPHB2, ALCAM, HOXA1, LAMB2, NUMB, B3GNT1, CLASP2, FN1, SPTBN4, GAS1, GAS7, SFRP5, EPHA4, EPHA7, ULK1, LAMA5, ULK2, DLX5, ANTXR1, CACNA1A, CDC42BPB, MYH10, NRP2, UCHL1, RAB3IP, POU4F3, M…	2906	356	13528	1.30764	0.999996	0.0683167	4.623
GOTERM_BP_FAT	GO:0009081~branched chain family amino acid metabolic process	10	0.27465	0.00248722	ALDH6A1, MCCC2, BCKDK, BCAT2, MCCC1, BCKDHB, ACAD8, HIBCH, GHR, AUH	2906	16	13528	2.9095	0.999996	0.0680837	4.63246
GOTERM_BP_FAT	GO:0030099~myeloid cell differentiation	33	0.906344	0.00269011	CALCR, MAEA, MMP9, CSF1, ZBTB16, PRDX3, VPS33A, TGFB1, MLL5, CASP8, BCL6, TCEA1, ACIN1, RUNX1, TRAF6, MYST1, EPO, MB, BMP4, EPAS1, TGFBR2, SMAD5, BPGM, DNASE2, RPS19, SP1, ID2, HOXB7, RPS14, SP3, NCOA6, IRF8, SCAND1	2906	93	13528	1.65184	0.999999	0.0730411	5.00125
GOTERM_BP_FAT	GO:0052547~regulation of peptidase activity	31	0.851414	0.00284223	CAV1, MGMT, SNCA, CDH1, RPS3, MEN1, SLC11A2, GPX1, MOAP1, CDKN2A, CASP9, MTCH1, PYCARD, MYC, HIP1, COL4A3, CARD8, HERPUD1, FOXL2, SMAD6, TP53, HBXIP, STAT1, BCL2L13, GSPT1, BAX, CSTB, APAF1, HSPD1, DNAJB6, F2R	2906	86	13528	1.67804	0.999999	0.0766027	5.27685
GOTERM_BP_FAT	GO:0008283~cell proliferation	119	3.26833	0.00284691	TUSC2, PDGFB, IL15, TGFB1, SHH, TGFB2, COL4A3BP, ASPM, CUL1, MATK, SYK, CYP1A1, EMX2, PIM1, LIG4, DCTN2, VEGFB, HHEX, IGSF8, NDEL1, PRDM4, RIPK2, EMP2, RBP4, ACHE, GNAI2, ERBB2, SIPA1, BOP1, EPHB4, FTH1, NR2C2, CD74, RPS27, SLC29A2, CSE1L, NUMB, LHX9, NUDC, BMP4, SPHK2, CSRP2, CDC27, GAS6, EPS15, HOXB4, LAMP3, EPS8, LAMA5, CD274, PCNA, HSPD1, ADRA1D, MYH10, E2F1, COPS2, FGF5, ZBTB32, NBN, CDC14A,…	2906	436	13528	1.27057	0.999999	0.0763168	5.28531
GOTERM_BP_FAT	GO:0000904~cell morphogenesis involved in differentiation	72	1.97748	0.00288074	NRP2, UCHL1, TGFB1, SHH, TGFB2, BDNF, APP, POU4F3, POU4F2, SEMA3B, POU4F1, GDF9, SEMA3A, TOP2B, RPS27A, EFNB3, BAIAP2, STXBP1, TBCE, VAX2, TBR1, CDK5, SLIT1, VASP, SLIT3, HES1, SLITRK1, SLITRK3, NDEL1, SIAH1, UBB, SLITRK5, C1ORF187, LPPR4, ERBB2, EPHB3, MYCBP2, EPHB2, ALCAM, HOXA1, IGF1R, LAMB2, BCL2, NUMB, GBX2, B3GNT1, RTN4RL2, NEFL, ETV4, FN1, APC, ACTB, PTPRZ1, SPTBN4, MAP1B, TRIM28, RTN4R, N…	2906	244	13528	1.37366	1	0.0767816	5.3465
GOTERM_BP_FAT	GO:0006457~protein folding	55	1.51057	0.00294843	GRPEL2, GRPEL1, TTC9C, PDIA6, CANX, PIGK, TOR3A, BAG4, DNAJC18, DNAJB11, SLMAP, BAG2, DNAJC7, MKKS, PDRG1, DNAJC4, AARS, TBCE, CCT6A, PFDN1, PFDN6, PFDN5, TBCD, FKBP14, C19ORF2, FKBP11, FKBP2, FKBP7, FKBP5, FKBP4, FKBP3, NFYC, CALR, STUB1, CD74, GLRX2, PIN1, TTC1, CCT6B, MPDU1, TOR1A, PPIL3, DNAJA2, TCP1, CCT5, PPIH, DNAJB9, CCT4, PPIG, PPIB, PPID, PPIC, DNAJB2, HSPD1, DNAJB6	2906	177	13528	1.44653	1	0.0781038	5.46881
GOTERM_BP_FAT	GO:0043281~regulation of caspase activity	29	0.796484	0.0029742	MGMT, SNCA, CDH1, RPS3, MEN1, SLC11A2, GPX1, MOAP1, CDKN2A, CASP9, MTCH1, PYCARD, MYC, HIP1, COL4A3, CARD8, HERPUD1, FOXL2, SMAD6, TP53, HBXIP, STAT1, BCL2L13, GSPT1, BAX, APAF1, HSPD1, DNAJB6, F2R	2906	79	13528	1.70887	1	0.078349	5.51534
GOTERM_BP_FAT	GO:0045944~positive regulation of transcription from RNA polymerase II promoter	103	2.82889	0.00316821	MEF2C, THRB, XRCC6, RORA, TGFB1, SHH, GATA2, EPC1, APP, PROP1, GATA6, GATA4, RARB, SUPT5H, MYO6, MTA2, STRN3, SIX4, TBR1, JUNB, PPARGC1B, HOXD9, HES1, HHEX, EP300, SMARCA4, HMGB2, CAMTA2, HOXA13, SOX2, SOX5, NFKBIA, SRF, HOXA1, MEIS2, IL17F, RUNX1, NKX2-5, BMP4, BMP3, KLF6, ESRRA, UTF1, MLL, EPAS1, KLF12, MAML1, SMAD5, TEAD2, SMAD1, NEUROG3, DLX2, ATF4, ETS1, KLF4, E2F1, PPARA, MITF, RHOQ, PAX3, …	2906	371	13528	1.29241	1	0.082818	5.8649
GOTERM_BP_FAT	GO:0048285~organelle fission	68	1.86762	0.00321804	MAD1L1, LZTS2, TUBB2A, COX10, AURKB, PTTG1, CD2AP, LATS1, KIF2C, MC1R, TARDBP, USP16, CCNA2, ASPM, STAG1, ANAPC2, KIF11, SGOL1, TPX2, NUSAP1, PBK, DCTN3, WEE1, CDK2, EML4, DCTN2, MAD2L1, RCC2, SPAG5, C14ORF106, MAPRE2, AKAP8, NEK4, MAD2L2, CHFR, NUP43, NEK6, PPP5C, FZR1, NEK2, CETN3, NEDD9, ANAPC11, RCC1, NIPBL, KATNA1, FBXO5, CLASP2, ZWILCH, NUDC, BUB3, APC, SSSCA1, TXNL4B, CDC20, CENPE, SUGT1, …	2906	229	13528	1.38233	1	0.0836338	5.9545
GOTERM_BP_FAT	GO:0035113~embryonic appendage morphogenesis	31	0.851414	0.00346297	HOXA13, FGF9, GNA12, HOXD12, ZBTB16, PRRX2, GREM1, GLI3, SHH, ALDH1A2, RAB23, HOXA9, FBN2, RARB, ALX4, TWIST1, TBX3, TBX5, SKI, EN1, GAS1, HOXD9, MSX1, TULP3, DLX5, LRP6, PBX1, GNAS, PBX2, SMARCA4, LRP5	2906	87	13528	1.65875	1	0.0892578	6.39365
GOTERM_BP_FAT	GO:0030326~embryonic limb morphogenesis	31	0.851414	0.00346297	HOXA13, FGF9, GNA12, HOXD12, ZBTB16, PRRX2, GREM1, GLI3, SHH, ALDH1A2, RAB23, HOXA9, FBN2, RARB, ALX4, TWIST1, TBX3, TBX5, SKI, EN1, GAS1, HOXD9, MSX1, TULP3, DLX5, LRP6, PBX1, GNAS, PBX2, SMARCA4, LRP5	2906	87	13528	1.65875	1	0.0892578	6.39365
GOTERM_BP_FAT	GO:0001558~regulation of cell growth	59	1.62043	0.00349424	IGFBP7, FGFRL1, TGFB1, TTL, TGFB2, NOV, ACVR1B, CDKN2A, CD44, CTGF, CDKN2C, MAPT, SEMA3F, SERTAD3, GDF9, SEMA3A, GNG4, SERTAD1, SERTAD2, NET1, EBAG9, CYR61, PPP2R1A, ADAM10, CGRRF1, SOCS2, BARHL2, TP53, ADIPOR1, ESR2, VEGFB, PRKCQ, EP300, PRDM4, WFDC1, ADAM17, DCUN1D3, C6ORF108, DCBLD2, TNFRSF12A, SIPA1, PPT1, GREM1, PPP2CA, BCL2, RASGRP2, BCL6, ING1, TMEM97, IL7, SPHK1, MAP1B, PSRC1, CDH13, RNF6…	2906	194	13528	1.41576	1	0.089571	6.44959
GOTERM_BP_FAT	GO:0051094~positive regulation of developmental process	80	2.1972	0.00349524	XRCC4, CDX2, STAR, THRB, IL6ST, FGF9, XRCC6, RPS6KB1, TNFSF12, GLI3, TGFB1, SHH, TGFB2, MEN1, ACTR3, CASP6, GATA2, ACVR1B, BDNF, SMAP1, CDKN2B, GATA6, IL4R, MAPT, HEY2, GATA4, POU4F2, RARA, CHRNA7, ACIN1, IHH, SYK, AP3B1, ARHGEF1, LIG4, JUNB, SMO, NDEL1, NME1, GNAS, TGIF2, TNFRSF12A, CSF1, SOX2, BMPR2, SRF, ADA, CD74, EPHB2, AGGF1, BCL2, NUMB, JUND, AP3D1, GFI1, INPP5D, RUNX1, NEFL, NKX2-5, APC, …	2906	278	13528	1.33962	1	0.0891432	6.45137
GOTERM_BP_FAT	GO:0001654~eye development	43	1.18099	0.0035499	BBS4, TWSG1, RBP4, IRX5, SOX2, MITF, NFYC, GLI3, SHH, EPHB2, TGFB2, ALDH1A2, CASP6, MEIS2, BLOC1S3, ALDH1A3, POU4F2, RARB, APC, BMP4, MAF, FOXL2, RAX, LMX1B, CYP1A1, YY1, RING1, PRKCI, VAX2, GAS1, STAT3, TULP3, SP1, NRL, SP3, BAX, NEUROD1, TGIF2, NEUROD4, MAB21L2, FOXE3, KLF4, MYH10	2906	132	13528	1.51647	1	0.0900205	6.54906
GOTERM_BP_FAT	GO:0007010~cytoskeleton organization	118	3.24087	0.00399811	CEP72, MAEA, PRC1, PDGFB, CAPZA2, LMO7, TTL, HOOK3, HOOK1, PACSIN2, RALA, PPP4C, INA, RET, ACTN4, STMN3, TMSB10, PCM1, DCTN2, RND3, NDEL1, RND1, SPAG5, ATP2C1, TESK2, DBN1, ADD2, PALM, BBS4, CAV1, SSH1, NEK2, SSH2, SIPA1, NEDD9, ARF6, ARPC5, KRT20, CALR, RCC1, DAAM2, LLGL1, PFN1, PFN2, KRAS, RAC2, KATNA1, NPM1, FBXO5, TUBE1, NPHP1, ARHGDIB, SPTBN4, GAS7, BRCA1, CORO1A, EPS8, LAMA5, LASP1, ANTXR1,…	2906	436	13528	1.25989	1	0.100316	7.34644
GOTERM_BP_FAT	GO:0033189~response to vitamin A	18	0.49437	0.00410525	BMP4, MUC1, RBP4, SP100, CYP1A1, IGFBP7, SOX2, MAP1B, SHH, ALDH1A2, MLL5, C14ORF104, DUSP1, CD44, OVCA2, RARA, LRP2, KLF4	2906	42	13528	1.99508	1	0.102359	7.53608
GOTERM_BP_FAT	GO:0045792~negative regulation of cell size	34	0.933809	0.00412617	DCBLD2, SIPA1, PPT1, GREM1, TGFB1, TGFB2, ACVR1B, CDKN2A, CDKN2C, SEMA3F, BCL2, PPP2CA, SERTAD3, GDF9, BCL6, SEMA3A, GNG4, ING1, SERTAD1, SERTAD2, DEPDC6, PPP2R1A, CGRRF1, IL7, PSRC1, TP53, ADIPOR1, ESR2, CDKN1A, RNF6, PRDM4, ULK1, WFDC1, DCUN1D3	2906	99	13528	1.59875	1	0.102349	7.57308
GOTERM_BP_FAT	GO:0040029~regulation of gene expression, epigenetic	28	0.76902	0.00414582	EIF2C2, CTCF, EPC1, FOS, GPX1, MLL5, SND1, SMARCD1, KCNQ1, MLL4, HEMK1, ATF7IP, DNMT3A, ZCCHC11, MLL, SIRT4, SIRT5, ARID1A, SMAD1, SIRT7, MBD3, BRCA1, SIRT2, SIRT3, H2AFY2, GLMN, EIF2C3, SMARCA4	2906	77	13528	1.6928	1	0.102309	7.6078
GOTERM_BP_FAT	GO:0030163~protein catabolic process	162	4.44933	0.00416398	DZIP3, BTRC, IDE, PPP2R5C, CD2AP, WWP1, FBXO28, FBXO24, RNF34, CUL1, RPS27A, AUP1, ANAPC2, SOCS2, SOCS1, UBR2, PSMA2, ASB8, MAD2L1, SEC61B, PIAS4, PSMA5, FBXL8, PIAS3, BACE2, PSMA3, RNF139, YME1L1, FBXL6, PIAS1, TNFAIP3, ASB6, FBXO11, RAD23B, FZR1, DERL1, SYVN1, WDR5B, PPT1, NEDD8, ANAPC11, RFFL, RBX1, ARIH1, FBXW7, PSMB7, FBXW8, PSMB6, FBXW5, FBXO6, STAMBPL1, FBXO5, FBXO4, FBXO3, PPIL5, TRAF6, F…	2906	622	13528	1.21245	1	0.102236	7.63989
GOTERM_BP_FAT	GO:0007050~cell cycle arrest	35	0.961274	0.0043264	ING4, NBN, SESN2, CALR, TCF7L2, SESN1, TGFB1, TGFB2, MEN1, MLL5, CDKN2A, CDKN2B, CDKN2C, PKD1, MYC, CUL1, MAP2K6, APC, CGRRF1, MSH2, AK1, WDR6, TP53, TBRG4, GAS1, CDKN3, GAS7, VASH1, CDKN1C, CDKN1A, IRF6, BTG4, IL12A, GAS2L1, GADD45A	2906	103	13528	1.58186	1	0.105501	7.92639
GOTERM_BP_FAT	GO:0034623~cellular macromolecular complex disassembly	13	0.357045	0.00433673	MTERF, TTF1, MRRF, ETF1, MTIF3, TTF2, KIF2C, SET, MAZ, SMARCE1, MTRF1, SUPT16H, XRN2	2906	26	13528	2.3276	1	0.105232	7.94457
GOTERM_BP_FAT	GO:0032984~macromolecular complex disassembly	13	0.357045	0.00433673	MTERF, TTF1, MRRF, ETF1, MTIF3, TTF2, KIF2C, SET, MAZ, SMARCE1, MTRF1, SUPT16H, XRN2	2906	26	13528	2.3276	1	0.105232	7.94457
GOTERM_BP_FAT	GO:0006397~mRNA processing	90	2.47185	0.00434436	RALY, EIF2C2, RBM15B, LSM6, U2AF2, RBM5, SNRPD1, MLH1, WBP4, YBX1, RNGTT, PNN, APP, SFRS4, SFRS5, RBM8A, PCBP1, PRMT5, TARDBP, U2AF1, SRRM1, QKI, DHX35, PTBP2, LSM2, LSM1, TSEN2, CCAR1, TFIP11, ZFP36, SNRPA1, KHDRBS3, NOL3, EFTUD2, SF1, PRPF39, PRPF3, SFRS1, CSTF2T, SFRS3, TTF2, PAPD4, KHSRP, SNRPB, CPSF3, SNRPE, XRN2, SNRPG, THOC1, ZC3H3, POLR2G, POLR2F, STRAP, NHP2L1, TRA2A, SNRPB2, ZCRB1, SF3B…	2906	321	13528	1.3052	1	0.104904	7.95801
GOTERM_BP_FAT	GO:0006643~membrane lipid metabolic process	29	0.796484	0.00446245	ARV1, GM2A, PPT1, LASS5, LASS6, ST6GALNAC4, B3GNT5, ST3GAL5, SMPDL3A, COL4A3BP, PPP2CA, CERK, B4GALT4, GBA, PPP2R1A, SPTLC1, SPHK2, PSAP, ALDH5A1, SPHK1, GBA2, C14ORF147, LARGE, BAX, LASS2, LASS1, ST8SIA5, SMPD3, CLN6	2906	81	13528	1.66668	1	0.107092	8.16571
GOTERM_BP_FAT	GO:0048678~response to axon injury	11	0.302115	0.00446834	PCSK1, LAMB2, BCL2, ERBB2, BAX, MAP1B, RTN4RL2, NEFL, SHH, SOD2, EPO	2906	20	13528	2.56036	1	0.106719	8.17607
GOTERM_BP_FAT	GO:0007411~axon guidance	36	0.988739	0.00451582	NRP2, ERBB2, EPHB3, SHH, MYCBP2, EPHB2, ALCAM, HOXA1, APP, BDNF, POU4F3, GBX2, B3GNT1, POU4F2, SEMA3B, SEMA3A, ETV4, RPS27A, EFNB3, NFASC, GAS1, ISL1, CDK5, TBR1, SLIT1, VASP, SLIT3, EPHA4, EPHA7, MAPK8IP3, SIAH1, UBB, FEZ2, C1ORF187, GFRA3, MYH10	2906	107	13528	1.56623	1	0.107286	8.25943
GOTERM_BP_FAT	GO:0045596~negative regulation of cell differentiation	64	1.75776	0.00451937	PPARA, NBN, HIST4H4, CDX2, REST, GLI3, SHH, TGFB1, MEN1, BDNF, IL4R, SEMA3F, SEMA3A, ASPM, TWIST1, IHH, ZFP36, LBX1, ZCCHC11, ARHGEF1, TP53, CDK6, LIG4, HES1, MAPK1, CCND1, NME1, TWSG1, CAV1, HIST1H4L, SOX2, NFKBIA, ZBTB16, PRDM16, CALR, TCF7L2, CD74, EPHB2, OVOL2, ITGAV, BCL6, HIST1H4C, GFI1, INPP5D, HIST1H4D, TLX3, HIST1H4I, RUNX1, NKX2-5, APC, BMP4, TBX3, FLT3, RTN4R, SKI, ISL1, WWTR1, NKX6-1,…	2906	216	13528	1.37932	1	0.106864	8.26567
GOTERM_BP_FAT	GO:0044257~cellular protein catabolic process	157	4.312	0.00485042	DZIP3, BTRC, IDE, PPP2R5C, CD2AP, WWP1, FBXO28, FBXO24, RNF34, CUL1, RPS27A, AUP1, ANAPC2, SOCS2, SOCS1, UBR2, PSMA2, ASB8, MAD2L1, SEC61B, PIAS4, PSMA5, FBXL8, PIAS3, BACE2, PSMA3, RNF139, FBXL6, PIAS1, TNFAIP3, ASB6, FBXO11, RAD23B, FZR1, DERL1, SYVN1, WDR5B, NEDD8, ANAPC11, RFFL, RBX1, ARIH1, FBXW7, PSMB7, FBXW8, PSMB6, FBXW5, FBXO6, STAMBPL1, FBXO5, FBXO4, FBXO3, PPIL5, TRAF6, FBXO8, HACE1, C…	2906	603	13528	1.21205	1	0.113715	8.84496
GOTERM_BP_FAT	GO:0051338~regulation of transferase activity	102	2.80143	0.00495283	PDGFB, EFNA1, HMGCR, ADCY6, EDN1, MBIP, TLR6, TGFB1, TGFB2, ZGPAT, MAP3K6, PRKAR2B, MAP3K5, PRKAR2A, APP, CDKN2A, CDKN2B, CDKN2C, PDGFC, CHRNA7, PRKACB, GNG3, MAP2K6, SYK, DEPDC6, ANAPC2, RBL2, MADD, PIM1, PKIB, SPAG9, MAP4K5, CAV1, GNAI2, ERBB2, PFKFB2, MAP4K1, CDC37, CD74, KRAS, HEXIM2, NPM1, TRAF6, SPHK2, SPHK1, TGFBR2, CDKN1C, CDKN1A, PRKAR1B, RGS4, PRKAR1A, CCNT2, PRKAG1, PRKAG2, PRDX3, SDC4…	2906	372	13528	1.27642	1	0.115443	9.02347
GOTERM_BP_FAT	GO:0048565~gut development	16	0.43944	0.00497035	RET, CYP1A1, FGF9, TCF7L2, GLI3, MIXL1, SHH, TGFB1, ADA, ALDH1A2, OVOL2, BCL2, FOXF1, FOXF2, GATA4, PCSK5	2906	36	13528	2.06898	1	0.115296	9.05398
GOTERM_BP_FAT	GO:0045597~positive regulation of cell differentiation	67	1.84015	0.00504123	XRCC4, CDX2, THRB, STAR, IL6ST, XRCC6, GLI3, SHH, TGFB1, TGFB2, ACTR3, MEN1, ACVR1B, BDNF, SMAP1, CDKN2B, GATA6, IL4R, MAPT, POU4F2, RARA, ACIN1, SYK, AP3B1, IHH, ARHGEF1, LIG4, JUNB, SMO, NDEL1, NME1, GNAS, TGIF2, TNFRSF12A, CSF1, SOX2, BMPR2, SRF, ADA, CD74, EPHB2, BCL2, JUND, NUMB, AP3D1, GFI1, INPP5D, RUNX1, NEFL, NKX2-5, APC, BMP4, IL7, VHL, TBX5, MAP1B, SMAD5, TGFBR2, SMAD1, NEUROG3, NKX6-1…	2906	229	13528	1.362	1	0.116312	9.17729
GOTERM_BP_FAT	GO:0051384~response to glucocorticoid stimulus	28	0.76902	0.00506782	CALCR, CAV1, PTGS2, IGFBP7, PTGS1, RPS6KB1, ASL, FOS, PCSK1, UGT1A9, GOT1, KRAS, BCL2, FOSL1, NEFL, GHR, BMP4, ACADS, BCKDHB, PTPRU, JUNB, PPARGC1B, SDC1, CDKN1A, CCND1, EP300, DUSP1, PDCD7	2906	78	13528	1.6711	1	0.116359	9.22351
GOTERM_BP_FAT	GO:0030278~regulation of ossification	28	0.76902	0.00506782	CALCR, TWSG1, THRB, IL6ST, CSF1, SOX2, BMPR2, TGFB1, TGFB2, MEN1, BCL2, JUND, APC, BMP4, ESRRA, PTGER4, SMAD5, FZD1, CDK6, SKI, SMAD1, SFRP1, DLX5, BMP2K, GNAS, PBX1, CHRD, BMPR1A	2906	78	13528	1.6711	1	0.116359	9.22351
GOTERM_BP_FAT	GO:0051276~chromosome organization	129	3.54298	0.00508696	XRCC6, CBX1, PTTG1, EPC1, TAF5L, MLL5, BRPF1, SMARCD2, SMARCD3, HIST1H2BI, SMARCD1, H2AFZ, H2AFX, TLK2, ACIN1, SUPT5H, MLL3, MYST1, MLL4, RBL2, C11ORF30, MTA2, HDAC10, HMG20A, ARID1A, LIG4, TAF6L, EP300, MAD2L1, SMARCE1, RFC1, PRDM5, SMARCA5, AKAP8, PAF1, SMARCA4, HIST1H4L, HMGB2, NEK2, SOX2, TRRAP, VPS72, NIPBL, NPM1, HIST1H4C, SUPT7L, FBXO4, HIST1H4D, HIST1H4I, ASF1B, DNMT3A, MLL, SETDB2, WHSC1…	2906	485	13528	1.23819	1	0.116245	9.25676
GOTERM_BP_FAT	GO:0043632~modification-dependent macromolecule catabolic process	150	4.11975	0.00513146	DZIP3, BTRC, PPP2R5C, CD2AP, WWP1, FBXO28, FBXO24, RNF34, CUL1, RPS27A, AUP1, ANAPC2, SOCS2, SOCS1, UBR2, PSMA2, ASB8, MAD2L1, SEC61B, PIAS4, PSMA5, FBXL8, PIAS3, PSMA3, RNF139, PIAS1, FBXL6, TNFAIP3, ASB6, FBXO11, RAD23B, FZR1, DERL1, SYVN1, WDR5B, NEDD8, ANAPC11, RFFL, RBX1, ARIH1, FBXW7, PSMB7, FBXW8, PSMB6, FBXW5, FBXO6, STAMBPL1, FBXO5, FBXO4, FBXO3, PPIL5, TRAF6, FBXO8, HACE1, CDC20, SUGT1,…	2906	574	13528	1.21651	1	0.116676	9.33404
GOTERM_BP_FAT	GO:0019941~modification-dependent protein catabolic process	150	4.11975	0.00513146	DZIP3, BTRC, PPP2R5C, CD2AP, WWP1, FBXO28, FBXO24, RNF34, CUL1, RPS27A, AUP1, ANAPC2, SOCS2, SOCS1, UBR2, PSMA2, ASB8, MAD2L1, SEC61B, PIAS4, PSMA5, FBXL8, PIAS3, PSMA3, RNF139, PIAS1, FBXL6, TNFAIP3, ASB6, FBXO11, RAD23B, FZR1, DERL1, SYVN1, WDR5B, NEDD8, ANAPC11, RFFL, RBX1, ARIH1, FBXW7, PSMB7, FBXW8, PSMB6, FBXW5, FBXO6, STAMBPL1, FBXO5, FBXO4, FBXO3, PPIL5, TRAF6, FBXO8, HACE1, CDC20, SUGT1,…	2906	574	13528	1.21651	1	0.116676	9.33404
GOTERM_BP_FAT	GO:0051603~proteolysis involved in cellular protein catabolic process	156	4.28454	0.00526651	DZIP3, BTRC, IDE, PPP2R5C, CD2AP, WWP1, FBXO28, FBXO24, RNF34, CUL1, RPS27A, AUP1, ANAPC2, SOCS2, SOCS1, UBR2, PSMA2, ASB8, MAD2L1, SEC61B, PIAS4, PSMA5, FBXL8, PIAS3, BACE2, PSMA3, RNF139, FBXL6, PIAS1, TNFAIP3, ASB6, FBXO11, RAD23B, FZR1, DERL1, SYVN1, WDR5B, NEDD8, ANAPC11, RFFL, RBX1, ARIH1, FBXW7, PSMB7, FBXW8, PSMB6, FBXW5, FBXO6, STAMBPL1, FBXO5, FBXO4, FBXO3, PPIL5, TRAF6, FBXO8, HACE1, C…	2906	600	13528	1.21035	1	0.119029	9.56818
GOTERM_BP_FAT	GO:0001501~skeletal system development	89	2.44438	0.00527504	CYP24A1, AEBP1, PTGS2, FGF9, TUFT1, MMP9, EDN1, HOXD12, PRRX2, DLK1, PRDX1, GLI3, TGFB1, SHH, GLI1, MEN1, HOXC8, CTGF, HOXC4, PAX7, ANKRD11, HOXC5, COL12A1, ALX4, COL11A2, MYC, IDUA, GHR, COL10A1, IHH, TWIST1, GSC, SIX4, HOXD9, SMO, EYA1, MSX1, NAB2, HOXD4, SORT1, GNAS, RBP4, TWSG1, OSTF1, ACHE, HOXA13, SOX5, COL2A1, ZBTB16, VDR, BCL2, IL17F, JUND, PKD1, HOXA9, TRAF6, PCSK5, BMP4, BMP3, ESRRA, EV…	2906	319	13528	1.29879	1	0.11868	9.58295
GOTERM_BP_FAT	GO:0052548~regulation of endopeptidase activity	29	0.796484	0.00541466	MGMT, SNCA, CDH1, RPS3, MEN1, SLC11A2, GPX1, MOAP1, CDKN2A, CASP9, MTCH1, PYCARD, MYC, HIP1, COL4A3, CARD8, HERPUD1, FOXL2, SMAD6, TP53, HBXIP, STAT1, BCL2L13, GSPT1, BAX, APAF1, HSPD1, DNAJB6, F2R	2906	82	13528	1.64635	1	0.121093	9.82436
GOTERM_BP_FAT	GO:0045667~regulation of osteoblast differentiation	18	0.49437	0.00545315	BMP4, TWSG1, ESRRA, IL6ST, SOX2, SMAD5, BMPR2, FZD1, CDK6, SKI, SMAD1, MEN1, DLX5, JUND, GNAS, CHRD, APC, BMPR1A	2906	43	13528	1.94869	1	0.121365	9.89079
GOTERM_BP_FAT	GO:0007093~mitotic cell cycle checkpoint	18	0.49437	0.00545315	MAD1L1, NBN, HUS1, TP53, CENPE, TRRAP, ATM, TGFB1, CCND1, MAD2L1, CDKN2B, CHFR, ZWILCH, MAD2L2, CCNA2, BUB3, APC, DLG1	2906	43	13528	1.94869	1	0.121365	9.89079
GOTERM_BP_FAT	GO:0034621~cellular macromolecular complex subunit organization	98	2.69157	0.00567057	TUBB2A, RBM5, SNRPD1, TGFB1, SFRS5, MC1R, HIST1H2BI, H2AFZ, PDGFC, H2AFX, NUP133, ARID1A, SFRS1, ADRM1, SMARCE1, C14ORF104, RPS14, SMARCA5, SNRPB, UNC13B, SNRPE, XRN2, SNRPG, CAV1, HMGB2, HIST1H4L, CALR, MTIF3, PXN, CSE1L, NPM1, FBXO5, TUBE1, HIST1H4C, HIST1H4D, ASF1B, HIST1H4I, HIP1, SRP54, SMAD1, MRRF, GAS7, SUPT16H, TUBD1, HIST1H3B, HIST1H3C, HIST1H3D, HSPD1, HIST1H3F, CACNA1A, COX11, HIST4H4,…	2906	357	13528	1.2779	1	0.125349	10.2653
GOTERM_BP_FAT	GO:0006917~induction of apoptosis	89	2.44438	0.0057752	ITGB3BP, PREX1, BNIP3, MLH1, TNFSF12, ITSN1, DAXX, PRDX1, MCF2L, TGFB1, CRADD, RPS3, CASP6, ACVR1B, GPX1, MAP3K5, APP, CDKN2A, HTRA2, TIAM2, CDKN2C, TIA1, CASP8, RPL11, DAP, MX1, MYC, DEDD2, CUL1, RPS27A, NET1, PPP2R1A, NUDT2, TP53, FADD, ARHGEF12, PRKCE, BCL2L13, DAPK3, ECT2, DAPK1, MAPK1, XPA, HIPK1, BNIP1, RIPK3, SORT1, UBB, UNC13B, RRM2B, STK17A, TIMP3, TRAIP, DPF1, GCH1, VDR, UTP11L, ERCC6, …	2906	320	13528	1.29473	1	0.12696	10.4449
GOTERM_BP_FAT	GO:0033044~regulation of chromosome organization	14	0.38451	0.00587637	MLL, SNCA, CTCF, TERF2IP, TNKS2, UBE2N, MEN1, SET, TLK2, ERCC4, TINF2, MYC, ERCC1, TERF2	2906	30	13528	2.17242	1	0.128483	10.6183
GOTERM_BP_FAT	GO:0007548~sex differentiation	47	1.29085	0.00591856	DHH, RBP4, HMGB2, HOXA13, HMGCR, FGF9, FKBP4, LEPR, SOX2, LHCGR, ZFP42, IDE, BCL2L1, TCF7L2, SHH, OSR1, ANG, BCL2, CSDE1, MKKS, IDH1, ANGPT1, HSD17B4, FANCG, EIF2B2, FNDC3A, LHX9, ERCC1, BMP4, UTF1, FOXL2, TBX3, MSH2, SMAD5, MEA1, SF1, CDKL2, INHBB, CCND1, SDC1, CCND2, NCOA4, BAX, BIK, PBX1, ADAMTS1, BMPR1A	2906	151	13528	1.44897	1	0.12879	10.6906
GOTERM_BP_FAT	GO:0040008~regulation of growth	94	2.58171	0.0059566	FGF9, IGFBP7, FGFRL1, RPS6KB1, TGFB1, TTL, ACVR1C, TGFB2, NOV, MEN1, EPC1, ACVR1B, BNIPL, APP, CDKN2A, HTRA2, CD44, CTGF, CDKN2C, SEMA3F, MAPT, CREG1, HEY2, GATA4, SERTAD3, PIK3CA, GDF9, SHC1, SEMA3A, GNG4, RPS27A, SERTAD1, SERTAD2, NET1, CYR61, EBAG9, BRD8, GHR, PPP2R1A, CGRRF1, ADAM10, SOCS2, NDNL2, SOCS1, BARHL2, TP53, ADIPOR1, ESR2, TNKS2, C20ORF20, VEGFB, PRKCQ, EP300, PRDM4, GHRH, ADAM17, W…	2906	341	13528	1.28325	1	0.129009	10.7556
GOTERM_BP_FAT	GO:0043254~regulation of protein complex assembly	31	0.851414	0.00605373	CAV1, ACTR3B, CAPZA2, ARF6, RDX, ARPC5, SRF, LATS1, VILL, ACTR3, EIF4EBP1, ARPC2, MAPT, NKX2-5, MDN1, RASA1, APC, ATF7IP, SMAD6, SPTBN4, PSRC1, MAP1B, STXBP1, TMSB10, ARPC1B, CORO1A, NCK1, ARPC5L, FAF1, ADD2, SPTAN1	2906	90	13528	1.60346	1	0.130418	10.9216
GOTERM_BP_FAT	GO:0034097~response to cytokine stimulus	28	0.76902	0.00615489	KYNU, PTGS2, IL6ST, SNCA, BCL2L1, SRF, GCH1, STAT6, ALDH1A2, CASP6, FOS, PCSK1, MYD88, CDKN2B, BCL2, CASP8, PPP3CB, FOSL1, GHR, ADAM10, SP100, GNAO1, SOCS1, STAT1, STAT3, JUNB, CORO1A, RIPK2	2906	79	13528	1.64994	1	0.131892	11.0941
GOTERM_BP_FAT	GO:0002200~somatic diversification of immune receptors	13	0.357045	0.00630108	EXO1, MSH6, XRCC4, NBN, MSH2, LIG1, XRCC6, MLH1, LIG4, FOXP1, PMS2, HSPD1, ERCC1	2906	27	13528	2.24139	1	0.134245	11.3429
GOTERM_BP_FAT	GO:0031123~RNA 3'-end processing	13	0.357045	0.00630108	ZFP36, ZC3H3, CSTF3, ELAC1, ZCCHC11, MLH1, SLBP, TRNT1, PAPOLA, APP, PAPD4, CPSF3, ZCCHC6	2906	27	13528	2.24139	1	0.134245	11.3429
GOTERM_BP_FAT	GO:0012502~induction of programmed cell death	89	2.44438	0.0063156	ITGB3BP, PREX1, BNIP3, MLH1, TNFSF12, ITSN1, DAXX, PRDX1, MCF2L, TGFB1, CRADD, RPS3, CASP6, ACVR1B, GPX1, MAP3K5, APP, CDKN2A, HTRA2, TIAM2, CDKN2C, TIA1, CASP8, RPL11, DAP, MX1, MYC, DEDD2, CUL1, RPS27A, NET1, PPP2R1A, NUDT2, TP53, FADD, ARHGEF12, PRKCE, BCL2L13, DAPK3, ECT2, DAPK1, MAPK1, XPA, HIPK1, BNIP1, RIPK3, SORT1, UBB, UNC13B, RRM2B, STK17A, TIMP3, TRAIP, DPF1, GCH1, VDR, UTP11L, ERCC6, …	2906	321	13528	1.29069	1	0.13397	11.3675
GOTERM_BP_FAT	GO:0008380~RNA splicing	80	2.1972	0.00632086	RALY, RBM15B, LSM6, U2AF2, RBM5, SNRPD1, WBP4, YBX1, PNN, SFRS4, SFRS5, RBM8A, PCBP1, PRMT5, TARDBP, U2AF1, SRRM1, QKI, DHX35, PTBP2, LSM2, LSM1, TSEN2, CCAR1, TFIP11, PPP2R1A, SNRPA1, NOL3, EFTUD2, SF1, PRPF39, PRPF3, SFRS1, SFRS3, TTF2, KHSRP, SNRPB, CPSF3, SNRPE, SNRPG, THOC1, POLR2G, POLR2F, NHP2L1, STRAP, TRA2A, SNRPB2, ZCRB1, SF3B4, POLR2C, POLR2B, SF3B3, SF4, SFRS16, CD2BP2, PPP2CA, CDC40,…	2906	284	13528	1.31132	1	0.133515	11.3765
GOTERM_BP_FAT	GO:0007507~heart development	63	1.73029	0.00632879	NRP2, POU6F1, EDN1, PAX3, GLI3, SHH, TGFB2, OSR1, GATA6, SMARCD3, COL4A3BP, GATA4, CASP8, MKKS, SEMA3C, RARB, MB, PTPRJ, LBX1, SCUBE1, MIXL1, SMO, HHEX, MSX1, EP300, NCOA6, GAA, ADAMTS1, SMARCA4, BBS4, RBP4, BBS5, ERBB2, COL2A1, EGLN1, SRF, ALDH1A2, LY6E, OVOL2, HAND2, RB1CC1, PPP3CB, PKD1, PCSK5, NKX2-5, NFATC3, BMP4, TBX3, TBX5, TGFBR2, HSPG2, ISL1, FOXP1, ATM, SOD2, ID2, ID1, NDUFV2, EPOR, ID3…	2906	215	13528	1.36408	1	0.133116	11.3899
GOTERM_BP_FAT	GO:0010165~response to X-ray	9	0.247185	0.00667975	XRCC4, ERCC8, CCND1, ERCC6, MSH2, TP53, LIG4, LRP2, ERCC1	2906	15	13528	2.79312	1	0.139403	11.9841
GOTERM_BP_FAT	GO:0021536~diencephalon development	16	0.43944	0.00672655	BMP4, RAX, SLC6A4, SOX2, CDH1, ISL1, GLI1, HES1, PCSK1, ALDH1A2, GATA2, EYA1, PROP1, GHRH, BAX, ALDH1A3	2906	37	13528	2.01306	1	0.139735	12.0631
GOTERM_BP_FAT	GO:0032989~cellular component morphogenesis	107	2.93875	0.00695727	TGFB1, SHH, TGFB2, BDNF, APP, COL4A3BP, FOXF1, GDF9, TBPL1, RPS27A, IDUA, EFNB3, BAIAP2, VAX2, PCM1, TBR1, STK4, HES1, SLITRK1, SLITRK3, NDEL1, SLITRK5, C1ORF187, BBS4, BBS5, LPPR4, SSH1, ERBB2, PTK7, TTC8, EPHB3, LLGL1, EPHB2, ALCAM, HOXA1, LAMB2, NUMB, B3GNT1, CLASP2, FN1, SPTBN4, CASC5, GAS1, GAS7, SFRP5, EPHA4, EPHA7, ULK1, LAMA5, ULK2, DLX5, ANTXR1, CACNA1A, CDC42BPB, MYH10, TMOD1, NRP2, COX…	2906	397	13528	1.25468	1	0.143593	12.4513
GOTERM_BP_FAT	GO:0000087~M phase of mitotic cell cycle	65	1.78522	0.00700668	MAD1L1, LZTS2, TUBB2A, AURKB, PTTG1, CD2AP, LATS1, KIF2C, MC1R, TARDBP, USP16, CCNA2, ASPM, STAG1, ANAPC2, KIF11, SGOL1, TPX2, NUSAP1, PBK, DCTN3, WEE1, CDK2, EML4, DCTN2, MAD2L1, RCC2, SPAG5, C14ORF106, MAPRE2, AKAP8, NEK4, MAD2L2, CHFR, NUP43, NEK6, PPP5C, FZR1, NEK2, CETN3, NEDD9, ANAPC11, RCC1, NIPBL, KATNA1, FBXO5, CLASP2, ZWILCH, NUDC, BUB3, APC, SSSCA1, TXNL4B, CDC20, CENPE, SIRT7, SUGT1, …	2906	224	13528	1.35084	1	0.143953	12.5342
GOTERM_BP_FAT	GO:0007067~mitosis	64	1.75776	0.00703365	MAD1L1, LZTS2, TUBB2A, PTTG1, AURKB, CD2AP, LATS1, KIF2C, MC1R, TARDBP, USP16, CCNA2, ASPM, STAG1, ANAPC2, KIF11, SGOL1, TPX2, NUSAP1, PBK, DCTN3, WEE1, CDK2, EML4, DCTN2, MAD2L1, RCC2, SPAG5, C14ORF106, MAPRE2, AKAP8, NEK4, MAD2L2, CHFR, NUP43, NEK6, PPP5C, FZR1, NEK2, CETN3, NEDD9, ANAPC11, RCC1, NIPBL, KATNA1, FBXO5, CLASP2, ZWILCH, NUDC, BUB3, APC, SSSCA1, TXNL4B, CDC20, CENPE, SUGT1, CDC26, …	2906	220	13528	1.35424	1	0.143883	12.5795
GOTERM_BP_FAT	GO:0000280~nuclear division	64	1.75776	0.00703365	MAD1L1, LZTS2, TUBB2A, PTTG1, AURKB, CD2AP, LATS1, KIF2C, MC1R, TARDBP, USP16, CCNA2, ASPM, STAG1, ANAPC2, KIF11, SGOL1, TPX2, NUSAP1, PBK, DCTN3, WEE1, CDK2, EML4, DCTN2, MAD2L1, RCC2, SPAG5, C14ORF106, MAPRE2, AKAP8, NEK4, MAD2L2, CHFR, NUP43, NEK6, PPP5C, FZR1, NEK2, CETN3, NEDD9, ANAPC11, RCC1, NIPBL, KATNA1, FBXO5, CLASP2, ZWILCH, NUDC, BUB3, APC, SSSCA1, TXNL4B, CDC20, CENPE, SUGT1, CDC26, …	2906	220	13528	1.35424	1	0.143883	12.5795
GOTERM_BP_FAT	GO:0030030~cell projection organization	100	2.7465	0.00709273	PDGFB, STRN, GRIN3A, CD2AP, SHH, BDNF, APP, CD44, RPS27A, SS18L1, MYO6, EFNB3, STMN3, BAIAP2, VAX2, PCM1, TBR1, SLITRK1, SLITRK3, NDEL1, IGSF9, SLITRK5, C1ORF187, BBS4, BBS5, LPPR4, ERBB2, ARF6, TTC8, FXYD5, EPHB3, EPHB2, ALCAM, HOXA1, LAMB2, RAC2, NUMB, B3GNT1, KLF5, SPTBN4, GAS1, GAS7, EPHA4, CORO1A, EPHA7, ULK1, LAMA5, ULK2, DLX5, CACNA1A, MYH10, NRP2, LIMA1, UCHL1, RAB3IP, SPAG16, EFHD1, POU4…	2906	368	13528	1.265	1	0.144421	12.6785
GOTERM_BP_FAT	GO:0006261~DNA-dependent DNA replication	22	0.60423	0.0071305	HMGB2, POLB, RRM2B, ORC1L, RAD51, CCNE2, POLD3, PRIM1, PNKP, POLD4, TFAM, RPA2, ORC2L, RFC4, RFC1, ORC4L, HELB, POLD1, POLD2, CDK2AP1, FEN1, TOP3B	2906	58	13528	1.76576	1	0.144554	12.7417
GOTERM_BP_FAT	GO:0043524~negative regulation of neuron apoptosis	20	0.5493	0.00724167	XRCC4, SNCB, MSH2, SNCA, AARS, ADNP, PPT1, BCL2L1, LIG4, PRDX3, ITSN1, SOD2, BDNF, KRAS, BAX, BCL2, NEFL, CACNA1A, RASA1, F2R	2906	51	13528	1.82557	1	0.146057	12.9276
GOTERM_BP_FAT	GO:0006399~tRNA metabolic process	38	1.04367	0.00771399	ELAC1, ELAC2, PUS1, ZNFX1, FARS2, LSM6, TRMT1, WARS2, QARS, IARS2, VARS, IARS, WARS, PARS2, HARS2, TSEN2, CDK5RAP1, TARSL2, NSUN2, MTO1, MARS, MOCS3, CARS, AARS, GARS, DALRD3, EPRS, SSB, AARSD1, DARS2, FBL, TRNT1, TARS, RARS, WDR4, POP4, TRUB2, DUS2L	2906	118	13528	1.49913	1	0.15423	13.7133
GOTERM_BP_FAT	GO:0006275~regulation of DNA replication	23	0.631695	0.0078135	PPP2R1A, NBN, NF2, PDGFB, HUS1, S100A11, TP53, TTF1, RAD9A, CALR, CDK2, TGFB1, GLI1, TNKS2, IGF1R, PPP2CA, PCNA, SHC1, PDGFC, ID3, TINF2, TERF2, EPO	2906	62	13528	1.72693	1	0.15545	13.8779
GOTERM_BP_FAT	GO:0048608~reproductive structure development	40	1.0986	0.00803685	RBP4, DHH, HMGB2, HOXA13, HMGCR, FGF9, LEPR, LHCGR, ZFP42, HOXB13, BCL2L1, SHH, OSR1, ANG, BCL2, CSDE1, MKKS, IDH1, ANGPT1, HSD17B4, FANCG, EIF2B2, FNDC3A, LHX9, ERCC1, BMP4, UTF1, FOXL2, MSH2, MEA1, SF1, INHBB, CCND1, SDC1, SFRP1, CCND2, NCOA4, BAX, BIK, ADAMTS1	2906	126	13528	1.47784	1	0.158914	14.2465
GOTERM_BP_FAT	GO:0051301~cell division	82	2.25213	0.00817006	CCNT2, MAD1L1, LZTS2, MAEA, KIAA0174, PRC1, CDC14A, AURKB, PTTG1, DAXX, LATS1, CD2AP, TGFB2, DSTN, CCNE2, CDKN2A, USP16, CCNA2, ASPM, STAG1, CDC7, ANAPC2, KIF11, LIG1, SGOL1, NUSAP1, CDK6, CDK7, LIG4, DCTN3, CDK5, WEE1, CDK2, PPP1CA, CCND1, MAD2L1, RCC2, CCND2, SPAG5, C14ORF106, MAPRE2, PDCD6IP, NEK4, MAD2L2, CHFR, NUP43, NEK6, SPAST, RBP4, BBS4, FZR1, NEK2, CETN3, NEDD9, ANAPC11, ZBTB16, RCC1, N…	2906	295	13528	1.29399	1	0.160707	14.4655
GOTERM_BP_FAT	GO:0034660~ncRNA metabolic process	66	1.81269	0.00858082	ZNFX1, LSM6, TRMT1, MKI67IP, QARS, IARS2, WARS, CDKN2A, WDR36, RPL11, CDK5RAP1, TSEN2, TARSL2, DEDD2, FTSJ3, MTO1, RPL35A, CARS, EXOSC9, ZCCHC11, EXOSC7, EXOSC4, AARS, EXOSC1, DARS2, TARS, RPS19, RPS16, RARS, RPS14, TRUB2, DUS2L, C1D, CPSF3L, ELAC1, ELAC2, PUS1, FARS2, WARS2, BOP1, VARS, IARS, UTP11L, RPL7, PARS2, HARS2, NSUN2, RPS24, MARS, TBL3, MOCS3, GARS, RPL26, DALRD3, EPRS, SSB, AARSD1, RPS…	2906	230	13528	1.33584	1	0.167453	15.1377
GOTERM_BP_FAT	GO:0021983~pituitary gland development	13	0.357045	0.00890562	BMP4, SOX2, CDH1, ISL1, GLI1, HES1, PCSK1, ALDH1A2, GATA2, EYA1, PROP1, GHRH, ALDH1A3	2906	28	13528	2.16134	1	0.172573	15.6657
GOTERM_BP_FAT	GO:0051259~protein oligomerization	52	1.42818	0.00892512	SLC6A1, PRKAG1, IDE, CASP8, GPX3, TRPV5, ANGPT1, USP16, SLC1A1, CUTA, KCND2, SCUBE3, BRAF, ALDH5A1, SCUBE1, PRKAB1, TP53, DPAGT1, FADD, CBR4, RAD51, SPAG9, UQCRH, RRM2, RRM1, ATPIF1, PRNP, SPAST, PPP5C, CAV1, ALDOC, CDH1, CDH2, GCH1, C1QTNF7, IGF1R, NPM1, PEX14, SKIL, PRKAA2, OLFM1, GCHFR, VHL, YWHAB, DGKH, SKI, ANXA5, BIRC3, BIRC2, SOD2, BAX, QPRT	2906	174	13528	1.39121	1	0.17226	15.6973
GOTERM_BP_FAT	GO:0044271~nitrogen compound biosynthetic process	89	2.44438	0.00893219	SEPHS2, ALAD, KYNU, ATP1B2, COX10, ATP5B, PRKAG2, SNCA, ADCY6, RORA, TGFB1, TGFB2, ATP2B1, GOT1, ATP2B4, ATP5L, ATP8B2, SPR, ATP5O, ATP6V0D1, DDAH2, ATP5H, TBPL1, COX15, ATP5J, NMNAT2, FECH, PRG3, HMBS, QDPR, PADI2, GMPS, NME7, ATP6V1F, PYCR1, UMPS, ATP2C1, ATP9B, RFK, NME1, RRM2, RRM1, BHMT, NFE2L1, ADC, BCAT2, DHFRL1, AZIN1, ATP5G2, ASNS, KMO, PAH, RRM2B, ATP5G1, ATP6V1B2, ASL, ATP12A, ATP6V0B,…	2906	325	13528	1.27481	1	0.171732	15.7087
GOTERM_BP_FAT	GO:0006997~nucleus organization	20	0.5493	0.00915946	NUP133, FOXL2, LMNA, BNIP3, PPT1, TXNDC12, MOAP1, CDKN2A, NDEL1, ETS1, ATXN7, BAX, DULLARD, APAF1, ACIN1, PES1, TOP2A, MYC, TSSK6, DEDD2	2906	52	13528	1.79046	1	0.175051	16.0761
GOTERM_BP_FAT	GO:0021513~spinal cord dorsal/ventral patterning	7	0.192255	0.0091618	SMO, TULP3, RAB23, GLI3, CHRD, SHH, NKX6-1	2906	10	13528	3.25864	1	0.174435	16.0799
GOTERM_BP_FAT	GO:0045137~development of primary sexual characteristics	40	1.0986	0.00924904	RBP4, DHH, HMGB2, HOXA13, HMGCR, FGF9, LEPR, SOX2, LHCGR, ZFP42, BCL2L1, SHH, OSR1, ANG, BCL2, CSDE1, MKKS, IDH1, ANGPT1, HSD17B4, FANCG, EIF2B2, FNDC3A, LHX9, ERCC1, BMP4, UTF1, FOXL2, TBX3, MSH2, MEA1, SF1, INHBB, CCND1, SDC1, CCND2, NCOA4, BAX, BIK, ADAMTS1	2906	127	13528	1.4662	1	0.175291	16.2205
GOTERM_BP_FAT	GO:0048193~Golgi vesicle transport	41	1.12606	0.00938409	ARFGAP1, PACS1, AP1M1, CLTA, STX7, NRBP1, AP1B1, AP1G1, COPZ1, BET1, FTH1, RAB3IP, TAPBP, COPB2, AP1S1, BLOC1S3, AP3B2, TMED10, DNAJC6, VPS13A, SNAP23, SEC24C, SAR1A, SEC24D, STX10, SCAMP1, ARL1, SCAMP2, COG3, COPG2, SCYL1, VAMP8, TXNDC5, SORT1, GOSR2, GOSR1, YKT6, SPAST, TRAPPC3, COPE, DNM2	2906	131	13528	1.45697	1	0.17696	16.4378
GOTERM_BP_FAT	GO:0006298~mismatch repair	12	0.32958	0.00962406	POLD3, EXO1, MSH6, MSH2, MSH5, TDG, PCNA, MLH1, PMS2, MLH3, ABL1, PMS2L3	2906	25	13528	2.23449	1	0.180401	16.8225
GOTERM_BP_FAT	GO:0008406~gonad development	36	0.988739	0.00991427	RBP4, DHH, HMGB2, HMGCR, FGF9, LEPR, ZFP42, LHCGR, BCL2L1, OSR1, ANG, BCL2, CSDE1, MKKS, IDH1, ANGPT1, FANCG, HSD17B4, EIF2B2, LHX9, FNDC3A, ERCC1, BMP4, UTF1, FOXL2, MSH2, MEA1, SF1, INHBB, SDC1, CCND1, CCND2, NCOA4, BAX, BIK, ADAMTS1	2906	112	13528	1.49631	1	0.184648	17.2855
GOTERM_BP_FAT	GO:0022037~metencephalon development	15	0.411975	0.00997901	PHOX2A, LMX1B, GAS1, RORA, CDK5, GLI1, HOXA1, SMO, ULK1, BCL2, GBX2, LHX5, NEUROD1, CACNA1A, MYH10	2906	35	13528	1.99508	1	0.185062	17.3884
GOTERM_BP_FAT	GO:0042542~response to hydrogen peroxide	21	0.576765	0.0100862	TXNIP, GNAO1, STAR, APTX, BCL2L1, PRDX3, STAT1, PRDX1, ADA, SOD2, GLRX2, CASP6, GPX1, SDC1, EP300, DUSP1, BCL2, GPX3, PPP2CB, FOSL1, MB	2906	56	13528	1.7457	1	0.186182	17.5587
GOTERM_BP_FAT	GO:0051054~positive regulation of DNA metabolic process	21	0.576765	0.0100862	PDGFB, PRKCG, TNFSF12, CALR, BRCA1, TGFB1, GLI1, RAD51, TNKS2, UBE2N, STAT6, EYA3, ERCC8, IGF1R, EYA1, SHC1, H2AFX, PDGFC, TINF2, TERF2, EPO	2906	56	13528	1.7457	1	0.186182	17.5587
GOTERM_BP_FAT	GO:0016445~somatic diversification of immunoglobulins	11	0.302115	0.0102612	EXO1, XRCC4, MSH6, NBN, MSH2, MLH1, PMS2, LIG4, HSPD1, ERCC1, FOXP1	2906	22	13528	2.3276	1	0.188417	17.8357
GOTERM_BP_FAT	GO:0035136~forelimb morphogenesis	11	0.302115	0.0102612	HOXD9, ALDH1A2, HOXA13, TBX3, TBX5, LRP6, HOXA9, EN1, ZBTB16, ALX4, TWIST1	2906	22	13528	2.3276	1	0.188417	17.8357
GOTERM_BP_FAT	GO:0060562~epithelial tube morphogenesis	24	0.65916	0.0103179	BMP4, BBS4, RET, PTK7, FZD3, CELSR1, PAX3, GREM1, GLI3, SHH, VASP, PFN1, EYA1, CD44, OVOL2, LAMA5, FOXF1, BCL2, CASP8, PBX1, APAF1, TRAF6, IPMK, TWIST1	2906	67	13528	1.66753	1	0.188677	17.9253
GOTERM_BP_FAT	GO:0034101~erythrocyte homeostasis	19	0.521835	0.0103806	BMP4, MAEA, EPAS1, SMAD5, BPGM, PRDX1, DNASE2, MLL5, RPS19, ID2, SP1, RPS14, SP3, TCEA1, BCL6, ACIN1, EPO, RPS24, MB	2906	49	13528	1.80508	1	0.189034	18.0244
GOTERM_BP_FAT	GO:0001649~osteoblast differentiation	17	0.466905	0.0103973	BMP4, CYP24A1, ACHE, FGF9, SMAD5, SMAD1, WWTR1, SHH, GLI1, MEN1, SMO, MEF2D, JUND, IGFBP3, CHRD, IGFBP5, IHH	2906	42	13528	1.88425	1	0.188633	18.0507
GOTERM_BP_FAT	GO:0045333~cellular respiration	32	0.878879	0.0104206	UQCRC2, NDUFB5, NDUFB6, COX10, NDUFB8, NDUFB9, SNCA, PDHB, NDUFB2, NDUFS7, NDUFS5, IDH1, NFATC3, COX15, NDUFA4, DLST, NDUFA5, NDUFA9, ACO1, ALDH5A1, NDUFC2, IDH3B, IDH3A, SOD2, SLC25A12, KIAA0100, SDHB, NNT, UQCRH, NDUFV2, UQCRB, MDH1	2906	97	13528	1.53573	1	0.188342	18.0874
GOTERM_BP_FAT	GO:0007169~transmembrane receptor protein tyrosine kinase signaling pathway	64	1.75776	0.0106464	FGF5, PDGFB, FGF9, EFNA1, RHOQ, SHOC2, TGFB1, INSRR, SLC2A8, EIF4EBP1, CTGF, ANGPT1, SHC1, PDGFC, SHC3, FGF3, GHR, PTPRJ, RET, SOCS2, EFNB3, BAIAP2, FGF22, CDK5, CD3EAP, GRB10, DOK4, NCK1, ROR1, SORT1, ADAM17, ADCYAP1R1, ERBB2, BMPR2, TFG, ABI1, EPHB3, EPHB4, PXN, EPHB2, IGF1R, UTP11L, SORBS1, SOS1, TEK, TXNIP, LTK, PTPN2, FLT3, FLT4, CBL, RAF1, EPHA1, STAT3, RPS6KA5, EPS15, EPHA5, EPHA4, EPHA7, …	2906	224	13528	1.33006	1	0.191346	18.4427
GOTERM_BP_FAT	GO:0010324~membrane invagination	63	1.73029	0.010722	LDLR, AP1B1, AP1G1, ATP5B, SNCA, SORL1, ITSN2, ITSN1, MEGF10, GATA2, AP1S1, APP, PACSIN2, CLEC4F, AP3B2, AP3B1, GHR, RAMP3, SCAMP1, RAMP2, MYO6, ICAM5, STXBP1, CDK5, M6PR, ELMO2, ELMO1, NPC1, ARRB2, NME1, TOM1, SORT1, EPN2, CAV1, SNX1, EEA1, PPT1, SNX3, AMPH, KRAS, ITGAV, PLA2R1, TRIP10, HIP1, LY75, DNM3, HCK, TGFBR2, RUFY1, CORO1C, SH3BP4, LMBR1L, CORO1A, LRP1, RABEP1, ULK1, GRIA1, LRP6, GRK4, L…	2906	220	13528	1.33308	1	0.191894	18.5614
GOTERM_BP_FAT	GO:0006897~endocytosis	63	1.73029	0.010722	LDLR, AP1B1, AP1G1, ATP5B, SNCA, SORL1, ITSN2, ITSN1, MEGF10, GATA2, AP1S1, APP, PACSIN2, CLEC4F, AP3B2, AP3B1, GHR, RAMP3, SCAMP1, RAMP2, MYO6, ICAM5, STXBP1, CDK5, M6PR, ELMO2, ELMO1, NPC1, ARRB2, NME1, TOM1, SORT1, EPN2, CAV1, SNX1, EEA1, PPT1, SNX3, AMPH, KRAS, ITGAV, PLA2R1, TRIP10, HIP1, LY75, DNM3, HCK, TGFBR2, RUFY1, CORO1C, SH3BP4, LMBR1L, CORO1A, LRP1, RABEP1, ULK1, GRIA1, LRP6, GRK4, L…	2906	220	13528	1.33308	1	0.191894	18.5614
GOTERM_BP_FAT	GO:0051402~neuron apoptosis	10	0.27465	0.0107258	APP, BCL2, BAX, POU4F3, PIGT, BNIP3, APAF1, LIG4, CDK5, ATM	2906	19	13528	2.4501	1	0.191282	18.5673
GOTERM_BP_FAT	GO:0000725~recombinational repair	10	0.27465	0.0107258	UBE2N, OBFC2B, RAD51AP1, HUS1, H2AFX, RAD54L, ERCC4, BRCA1, BTBD12, RAD51	2906	19	13528	2.4501	1	0.191282	18.5673
GOTERM_BP_FAT	GO:0035115~embryonic forelimb morphogenesis	10	0.27465	0.0107258	HOXD9, ALDH1A2, HOXA13, TBX3, TBX5, LRP6, HOXA9, EN1, ALX4, TWIST1	2906	19	13528	2.4501	1	0.191282	18.5673
GOTERM_BP_FAT	GO:0000724~double-strand break repair via homologous recombination	10	0.27465	0.0107258	UBE2N, OBFC2B, RAD51AP1, HUS1, H2AFX, RAD54L, ERCC4, BRCA1, BTBD12, RAD51	2906	19	13528	2.4501	1	0.191282	18.5673
GOTERM_BP_FAT	GO:0032446~protein modification by small protein conjugation	41	1.12606	0.0107364	ATG10, DZIP3, UBE3A, LMO7, NEDD8, ANAPC11, CBLL1, STUB1, SENP7, OS9, RBX1, SUMO3, ERCC8, SUMO2, FBXW7, WWP1, FBXO4, FBXO24, FBXO3, TRAF6, RPS27A, VHL, DDB1, CBL, RING1, TRIM23, RBBP6, BRCA1, UBE2N, RNF7, GSPT1, PIAS4, PIAS3, WDSUB1, SIAH1, SIAH2, PAF1, UBB, CHFR, RNF40, RNF41, FBXO11	2906	132	13528	1.44593	1	0.190783	18.5838
GOTERM_BP_FAT	GO:0042325~regulation of phosphorylation	122	3.35073	0.0107487	PDGFB, IL6ST, EFNA1, HMGCR, ADCY6, EDN1, MBIP, TLR6, TGFB1, TGFB2, PRKAR2B, ZGPAT, MAP3K6, MAP3K5, PRKAR2A, APP, CDKN2A, CDKN2B, CDKN2C, PDGFC, CHRNA7, PRKACB, PDGFD, GNG3, MAP2K6, SYK, DEPDC6, ANAPC2, RBL2, MADD, SOCS1, PIM1, PKIB, SPAG9, MAP4K5, CAV1, GNAI2, ERBB2, PFKFB2, BMPR2, MAP4K1, CDC37, CD74, PIN1, KRAS, HEXIM2, NPM1, TRAF6, BMP4, SPHK2, SMAD6, TGFBR2, SPHK1, CDKN1C, CDKN1A, PRKAR1B, RG…	2906	466	13528	1.21874	1	0.190316	18.6031
GOTERM_BP_FAT	GO:0030901~midbrain development	9	0.247185	0.0108723	HES1, MSX1, OTX1, EN1, EN2, SMAD1, PITX3, APLP2, SHH	2906	16	13528	2.61855	1	0.191624	18.7966
GOTERM_BP_FAT	GO:0009952~anterior/posterior pattern formation	43	1.18099	0.0109429	BMPR2, ZBTB16, GLI3, SHH, ALDH1A2, HOXA1, HOXC8, WNT3, HOXC4, HOXC5, GATA4, GBX2, HOXA9, ALX4, PCSK5, APC, MLLT3, MLL, TBX3, OTX1, YY1, EMX2, RING1, EN1, ATM, HOXD9, HES1, CTNNBIP1, HOXB4, HHEX, EP300, HIPK1, MEOX2, SFRP1, HOXB7, SFRP2, HOXB5, HOXD4, LRP6, NEUROD1, PBX1, LRP5, BMPR1A	2906	140	13528	1.42981	1	0.192081	18.907
GOTERM_BP_FAT	GO:0006308~DNA catabolic process	22	0.60423	0.0109517	RAD23B, FOXL2, DDB1, BNIP3, PPT1, CDK7, UBE2N, DNASE2, PNKP, RPA2, TXNDC12, XPA, CDKN2A, XPC, BAX, TDG, APAF1, MYC, ERCC4, BTBD12, ERCC1, XRN2	2906	60	13528	1.70691	1	0.191559	18.9207
GOTERM_BP_FAT	GO:0009953~dorsal/ventral pattern formation	22	0.60423	0.0109517	BMP4, GSC, LMX1B, SMAD6, EDN1, EN1, CXXC4, VAX2, GAS1, GLI3, NKX6-1, SHH, GLI1, SMO, TULP3, PROP1, OVOL2, PAX7, RAB23, CHRD, APC, BMPR1A	2906	60	13528	1.70691	1	0.191559	18.9207
GOTERM_BP_FAT	GO:0050678~regulation of epithelial cell proliferation	25	0.686625	0.010963	FGF9, ERBB2, TGFB1, TGFB2, GPX1, CDKN2B, TGFA, KRT4, TINF2, IHH, APC, CDK6, ESR2, GAS1, MMP12, FOXP1, CDKN1C, NME1, CCND2, DLX5, BAX, GRN, WFDC1, FOXE3, BMPR1A	2906	71	13528	1.63915	1	0.19108	18.9383
GOTERM_BP_FAT	GO:0015980~energy derivation by oxidation of organic compounds	44	1.20846	0.0110238	UQCRC2, NDUFB5, NDUFB6, IL6ST, PHKB, COX10, NDUFB8, NDUFB9, LEPR, SNCA, PRKAG2, PDHB, NDUFB2, NDUFS7, NDUFS5, GOT1, PPP1R1A, IDH1, NFATC3, AGL, COX15, NDUFA4, NDUFA5, DLST, ALDH5A1, NDUFA9, ACO1, EPM2A, NDUFC2, IDH3B, IDH3A, SOD2, SLC25A12, KIAA0100, SDHB, PPP1CA, NNT, PYGM, UQCRH, NDUFV2, GAA, GNAS, UQCRB, MDH1	2906	144	13528	1.42242	1	0.191382	19.0333
GOTERM_BP_FAT	GO:0016568~chromatin modification	76	2.08734	0.0114453	ENY2, EZH1, BNIP3, CTCF, MEN1, EPC1, MLL5, TAF5L, BRPF1, GFI1B, SMARCD2, SMARCD3, PRMT5, RTF1, SMARCD1, TLK2, SUPT5H, MLL3, USP16, MYST1, MLL4, BRD8, RBL2, C11ORF30, RING1, HDAC10, HMG20A, TTF1, ARID1A, MBD3, TAF6L, DAPK3, UBN1, C20ORF20, UBE2N, EYA3, EYA4, EYA1, EP300, SMARCE1, PRDM5, SMARCA5, PAF1, JMJD1C, CARM1, SMARCA4, SUPT3H, ING4, C17ORF79, NR3C1, TRRAP, VPS72, CHD1L, SUPT7L, SUPT4H1, ASF1…	2906	274	13528	1.29122	1	0.19729	19.688
GOTERM_BP_FAT	GO:0006665~sphingolipid metabolic process	26	0.71409	0.0115581	ARV1, GM2A, PPT1, LASS5, LASS6, ST3GAL5, SMPDL3A, COL4A3BP, PPP2CA, CERK, GBA, PPP2R1A, SPTLC1, SPHK2, PSAP, ALDH5A1, SPHK1, GBA2, C14ORF147, LARGE, BAX, LASS2, LASS1, ST8SIA5, SMPD3, CLN6	2906	75	13528	1.6138	1	0.198365	19.8623
GOTERM_BP_FAT	GO:0032270~positive regulation of cellular protein metabolic process	66	1.81269	0.0115632	IL6ST, BTRC, PRKAG2, TGFB1, MEN1, PSMD1, PSMD2, PSMD3, PSMD7, CUL1, PSMD8, SAMD4A, RPS27A, SYK, PSMD9, GHR, ANAPC2, BARHL2, UBE2N, PSMA2, MAPK1, CCND1, EP300, PIAS4, CCND2, PIAS3, PSMA5, PSMA3, IL12A, ADAM17, UBB, PIAS1, EIF5A2, CLN6, PSMB10, ATG10, FZR1, CAV1, CSF1, BMPR2, NFKBIA, ANAPC11, STUB1, PIN1, PSMB7, PSMB6, BCL2, RB1CC1, FBXO5, FBXO4, EPO, BMP4, NDFIP1, CDC20, CDC26, CDC27, BRCA1, PSMB8…	2906	233	13528	1.31864	1	0.197777	19.8701
GOTERM_BP_FAT	GO:0014070~response to organic cyclic substance	38	1.04367	0.0118396	SLC6A1, STAR, PTGS2, IGFBP7, LEPR, ALDOC, RPS6KB1, NEDD8, BCL2L1, TIMP3, TGFB1, FOS, PCSK1, CDKN2B, CD44, BCL2, ENO2, IDH1, CHRNA7, FOSL1, GHR, BMP4, GNAO1, CYP1A1, MSH2, TGFBR2, STAT1, CDK5, BIRC2, JUNB, STAT3, GNAL, PRKCQ, CDKN1A, CCND1, CCND2, CHRNB1, PPP5C	2906	121	13528	1.46196	1	0.201343	20.2959
GOTERM_BP_FAT	GO:0016055~Wnt receptor signaling pathway	41	1.12606	0.0122452	NKD1, LZTS2, BTRC, MITF, STRN, CXXC4, TCF7L2, CPZ, CSNK2A2, CSNK2A1, PROP1, WNT3, RSPO1, RSPO3, BRD7, BCL9, APC, CSNK1A1, WNT10B, TCF7, FZD1, CSNK2B, FZD3, PTPRU, FZD2, FZD5, TAX1BP3, FZD4, CTNNBIP1, SFRP5, HHEX, CCND1, FZD10, DACT1, INVS, SFRP1, PIAS4, SFRP2, SFRP4, LRP6, LRP5	2906	133	13528	1.43506	1	0.20682	20.9168
GOTERM_BP_FAT	GO:0070482~response to oxygen levels	43	1.18099	0.0124256	CYB5R4, PPARA, CAV1, PDGFB, ALDOC, EDN1, EGLN3, BNIP3, EGLN1, BCL2L1, XRCC1, ASL, TGFB1, SHH, ADA, TGFB2, SLC11A2, SLC2A8, HMOX2, ANG, BCL2, CHRNA7, ANGPT1, SCNN1B, EPO, MB, NOL3, EPAS1, ACTN4, CYP1A1, VHL, BIRC2, ITPR2, SOD2, HYOU1, PRKCQ, CDKN1A, EP300, PYGM, PDE5A, HIF3A, ADAM17, VLDLR	2906	141	13528	1.41967	1	0.208848	21.1913
GOTERM_BP_FAT	GO:0051325~interphase	34	0.933809	0.012753	E2F1, ZNF655, RCC1, LATS1, ACVR1B, APP, GFI1B, CDKN2A, CDKN2B, CDKN2C, KATNA1, BCL2, PPP3CB, GFI1, CUL1, CDC7, PIM1, TBRG4, CDK6, TPD52L1, CDKN3, CDK2, CDKN1C, CDKN1A, CCND1, PPM1D, GSPT1, CCND2, POLD1, CDK2AP1, ADAM17, ABL1, GADD45A, DNM2	2906	106	13528	1.49318	1	0.213047	21.6875
GOTERM_BP_FAT	GO:0001655~urogenital system development	35	0.961274	0.0129949	RBP4, HOXA13, HOXB13, RRM2B, ZBTB16, GREM1, ASL, GLI3, SHH, ALDH1A2, BDNF, SPRY1, OSR1, CD44, BCL2, ALDH1A3, POU3F3, PCSK9, RARB, PCSK5, C1GALT1, APC, BMP4, RET, SMAD1, WWTR1, SDC1, EYA1, SFRP1, INVS, LAMA5, BAX, SALL1, PBX1, ADAMTS1	2906	110	13528	1.4812	1	0.215932	22.0521
GOTERM_BP_FAT	GO:0045926~negative regulation of growth	35	0.961274	0.0129949	DCBLD2, ING4, SIPA1, PPT1, GREM1, TGFB1, TGFB2, MEN1, ACVR1B, CDKN2A, CDKN2C, SEMA3F, BCL2, PPP2CA, SERTAD3, BCL6, GDF9, SEMA3A, GNG4, ING1, SERTAD1, SERTAD2, PPP2R1A, CGRRF1, IL7, PSRC1, TP53, ADIPOR1, ESR2, CDKN1A, RNF6, PRDM4, ULK1, WFDC1, DCUN1D3	2906	110	13528	1.4812	1	0.215932	22.0521
GOTERM_BP_FAT	GO:0016202~regulation of striated muscle tissue development	19	0.521835	0.0130345	BMP4, RBP4, TBX3, FGF9, TBX5, TGFBR2, RPS6KB1, SIRT2, TGFB1, BCL2, HEY2, GATA4, UBB, LUC7L, HDAC9, IGFBP3, NKX2-5, RPS27A, TWIST1	2906	50	13528	1.76897	1	0.215814	22.1117
GOTERM_BP_FAT	GO:0010564~regulation of cell cycle process	36	0.988739	0.0132092	ILKAP, FZR1, HOXA13, NEK2, EDN1, CTCF, CALR, RCC1, TGFB1, GPR3, MYCBP2, PIN1, CDKN2A, PRMT5, NPM1, TGFA, FBXO5, BCL6, APC, CDC7, CYP1A1, SMAD6, NEUROG1, NUSAP1, CENPE, GAS1, BRCA1, ATM, SIRT2, PRKCQ, PLK4, MAD2L1, DCUN1D3, MAD2L2, NEK6, SMARCA4	2906	114	13528	1.47006	1	0.217677	22.3739
GOTERM_BP_FAT	GO:0030218~erythrocyte differentiation	17	0.466905	0.0133272	BMP4, MAEA, EPAS1, SMAD5, BPGM, DNASE2, MLL5, RPS19, ID2, SP1, RPS14, SP3, TCEA1, BCL6, ACIN1, EPO, MB	2906	43	13528	1.84043	1	0.218696	22.5505
GOTERM_BP_FAT	GO:0000075~cell cycle checkpoint	30	0.823949	0.0134696	MAD1L1, NBN, HUS1, TRRAP, TGFB1, CCNE2, CDKN2A, CDKN2B, FBXO6, H2AFX, FANCG, ZWILCH, CCNA2, BUB3, DLG1, APC, MSH2, DDB1, TP53, BRIP1, CENPE, RAD9A, BRCA1, ATM, OBFC2B, CCND1, XPC, MAD2L1, CHFR, MAD2L2	2906	91	13528	1.53468	1	0.22006	22.7631
GOTERM_BP_FAT	GO:0030262~apoptotic nuclear changes	12	0.32958	0.0135014	TXNDC12, FOXL2, MOAP1, CDKN2A, BAX, BNIP3, PPT1, APAF1, ACIN1, TOP2A, MYC, DEDD2	2906	26	13528	2.14855	1	0.219818	22.8106
GOTERM_BP_FAT	GO:0001666~response to hypoxia	41	1.12606	0.0139235	PPARA, CAV1, PDGFB, ALDOC, EDN1, EGLN3, BNIP3, EGLN1, BCL2L1, XRCC1, ASL, TGFB1, SHH, ADA, TGFB2, SLC11A2, SLC2A8, HMOX2, ANG, BCL2, CHRNA7, ANGPT1, SCNN1B, EPO, MB, NOL3, EPAS1, ACTN4, CYP1A1, VHL, BIRC2, ITPR2, SOD2, HYOU1, PRKCQ, EP300, PYGM, PDE5A, HIF3A, ADAM17, VLDLR	2906	134	13528	1.42435	1	0.225175	23.4372
GOTERM_BP_FAT	GO:0043623~cellular protein complex assembly	48	1.31832	0.0141668	COX11, CAV1, WASF3, COX10, TUBB2A, PREX1, AP2S1, FKBP4, MLH1, CALR, TGFB1, PXN, NDUFS7, TFAM, NDUFS5, CCT6B, CSE1L, MC1R, ANG, FBXO5, TUBE1, PEX13, PDGFC, NEFL, HIP1, COX15, ARL2, TCP1, SRP54, IPO13, C20ORF7, CENPE, IPO8, SMAD1, CDK5, GAS7, ADRM1, TUBA8, C14ORF104, PFDN6, IPO7, IPO4, NCK1, NUP205, TUBD1, HSPD1, UNC13B, CACNA1A	2906	162	13528	1.37932	1	0.227926	23.7962
GOTERM_BP_FAT	GO:0009263~deoxyribonucleotide biosynthetic process	6	0.16479	0.0141852	TYMS, RRM2, RRM1, AK5, RRM2B, TBPL1	2906	8	13528	3.4914	1	0.22747	23.8233
GOTERM_BP_FAT	GO:0032414~positive regulation of ion transmembrane transporter activity	6	0.16479	0.0141852	ACTN4, PLCG2, STIM2, STIM1, NKX2-5, CALM1	2906	8	13528	3.4914	1	0.22747	23.8233
GOTERM_BP_FAT	GO:0051329~interphase of mitotic cell cycle	33	0.906344	0.0144691	E2F1, RCC1, LATS1, ACVR1B, APP, GFI1B, CDKN2A, CDKN2B, CDKN2C, KATNA1, BCL2, PPP3CB, GFI1, CUL1, CDC7, PIM1, TBRG4, CDK6, TPD52L1, CDKN3, CDK2, CDKN1C, CDKN1A, CCND1, PPM1D, GSPT1, CCND2, POLD1, CDK2AP1, ADAM17, ABL1, GADD45A, DNM2	2906	103	13528	1.49147	1	0.230755	24.2399
GOTERM_BP_FAT	GO:0009954~proximal/distal pattern formation	11	0.302115	0.0147201	HOXD9, DLX2, ALDH1A2, HOXA9, EN1, PBX1, GREM1, PBX2, GLI3, GLI1, APC	2906	23	13528	2.2264	1	0.233546	24.6066
GOTERM_BP_FAT	GO:0001755~neural crest cell migration	11	0.302115	0.0147201	NRP2, SMO, RET, OVOL2, LAMA5, SEMA3F, GBX2, SEMA3C, PAX3, ISL1, SHH	2906	23	13528	2.2264	1	0.233546	24.6066
GOTERM_BP_FAT	GO:0043010~camera-type eye development	34	0.933809	0.0147314	RBP4, TWSG1, IRX5, SOX2, MITF, NFYC, GLI3, SHH, EPHB2, CASP6, ALDH1A2, ALDH1A3, POU4F2, APC, MAF, BMP4, FOXL2, RAX, LMX1B, CYP1A1, YY1, RING1, VAX2, GAS1, TULP3, SP1, SP3, BAX, NEUROD1, NEUROD4, TGIF2, MAB21L2, KLF4, MYH10	2906	107	13528	1.47922	1	0.232981	24.6231
GOTERM_BP_FAT	GO:0006928~cell motion	123	3.37819	0.0147543	PTGS2, PDGFB, HMGCR, CAPZA2, RPS6KB1, TNFSF12, CD2AP, TGFB1, SHH, TGFB2, BDNF, APP, CD44, CTGF, RPS27A, SYK, TWIST1, RET, EFNB3, BARHL2, EMX2, SIX4, TBR1, ARPC1B, IGSF8, NDEL1, C14ORF104, CATSPER3, CATSPER1, HSPB1, C1ORF187, PALM, TNFRSF12A, ENPP2, ERBB2, ITGA11, ARF6, ARPC5, EPHB3, SRF, EPHB2, ALCAM, HOXA1, OVOL2, ARPC2, KATNA1, B3GNT1, STRBP, CLASP2, FN1, ARHGDIB, GAS1, EPHA4, EPHA7, CORO1A, UL…	2906	475	13528	1.20545	1	0.232579	24.6565
GOTERM_BP_FAT	GO:0032526~response to retinoic acid	14	0.38451	0.0147775	BMP4, MUC1, RBP4, SP100, IGFBP7, SOX2, SHH, MLL5, DUSP1, C14ORF104, OVCA2, RARA, LRP2, KLF4	2906	33	13528	1.97493	1	0.232184	24.6903
GOTERM_BP_FAT	GO:0014033~neural crest cell differentiation	14	0.38451	0.0147775	NRP2, RET, EDN1, PAX3, ISL1, SHH, ALDH1A2, SMO, OVOL2, LAMA5, HAND2, SEMA3F, GBX2, SEMA3C	2906	33	13528	1.97493	1	0.232184	24.6903
GOTERM_BP_FAT	GO:0014032~neural crest cell development	14	0.38451	0.0147775	NRP2, RET, EDN1, PAX3, ISL1, SHH, ALDH1A2, SMO, OVOL2, LAMA5, HAND2, SEMA3F, GBX2, SEMA3C	2906	33	13528	1.97493	1	0.232184	24.6903
GOTERM_BP_FAT	GO:0048638~regulation of developmental growth	18	0.49437	0.0148237	RBP4, TNFRSF12A, FGF9, TBX5, BARHL2, TGFBR2, MAP1B, RPS6KB1, TTL, RNF6, ULK1, MAPT, SEMA3F, HEY2, GATA4, UBB, SEMA3A, RPS27A	2906	47	13528	1.78284	1	0.232109	24.7574
GOTERM_BP_FAT	GO:0006325~chromatin organization	100	2.7465	0.015306	CBX1, EPC1, TAF5L, MLL5, BRPF1, SMARCD2, SMARCD3, HIST1H2BI, SMARCD1, H2AFZ, H2AFX, TLK2, SUPT5H, MLL3, MLL4, MYST1, RBL2, C11ORF30, MTA2, HDAC10, HMG20A, ARID1A, TAF6L, EP300, SMARCE1, PRDM5, SMARCA5, PAF1, SMARCA4, HMGB2, HIST1H4L, SOX2, TRRAP, VPS72, NPM1, SUPT7L, HIST1H4C, HIST1H4D, ASF1B, HIST1H4I, DNMT3A, MLL, SETDB2, WHSC1, PHF1, SMARCC1, SUPT16H, HIST1H3B, HIST1H3C, HIST1H3D, HIST1H3F, HD…	2906	378	13528	1.23153	1	0.238003	25.4559
GOTERM_BP_FAT	GO:0035239~tube morphogenesis	39	1.07113	0.0156051	BBS4, BBS5, EDN1, PTK7, HOXB13, PAX3, GREM1, SRF, GLI3, SHH, PFN1, CD44, OVOL2, HAND2, FOXF1, BCL2, CASP8, GATA4, GBX2, MKKS, TRAF6, IPMK, NKX2-5, IHH, TWIST1, CYR61, BMP4, RET, LBX1, TBX3, TGFBR2, FZD3, CELSR1, VASP, EYA1, PPP1CA, LAMA5, PBX1, APAF1	2906	127	13528	1.42955	1	0.24134	25.8861
GOTERM_BP_FAT	GO:0001822~kidney development	31	0.851414	0.0160976	RRM2B, ZBTB16, GREM1, ASL, GLI3, SHH, ALDH1A2, BDNF, SPRY1, OSR1, CD44, ALDH1A3, BCL2, POU3F3, PCSK9, RARB, PCSK5, C1GALT1, APC, BMP4, RET, SMAD1, WWTR1, SDC1, EYA1, INVS, LAMA5, BAX, SALL1, PBX1, ADAMTS1	2906	96	13528	1.50324	1	0.247233	26.5891
GOTERM_BP_FAT	GO:0048634~regulation of muscle development	19	0.521835	0.0161942	BMP4, RBP4, TBX3, FGF9, TBX5, TGFBR2, RPS6KB1, SIRT2, TGFB1, BCL2, HEY2, GATA4, UBB, LUC7L, HDAC9, IGFBP3, NKX2-5, RPS27A, TWIST1	2906	51	13528	1.73429	1	0.247783	26.7263
GOTERM_BP_FAT	GO:0048872~homeostasis of number of cells	32	0.878879	0.0164202	MAEA, CSF1, PRDX1, TGFB1, MEN1, MLL5, BCL2, PPP3CB, TCEA1, BCL6, ACIN1, EPO, RPS24, MB, BMP4, LIPA, EPAS1, IL7, SMAD5, TNFRSF13C, BPGM, DNASE2, CORO1A, CCNB2, RPS19, SP1, ID2, RPS14, BAX, SP3, IKBKB, F2R	2906	100	13528	1.48966	1	0.250044	27.0463
GOTERM_BP_FAT	GO:0006929~substrate-bound cell migration	7	0.192255	0.0165248	PDGFB, TNFRSF12A, ATP5B, ITGA11, CD2AP, MYH10, THBS4	2906	11	13528	2.9624	1	0.250684	27.1939
GOTERM_BP_FAT	GO:0045736~negative regulation of cyclin-dependent protein kinase activity	7	0.192255	0.0165248	MEN1, CDKN1A, CDKN2A, HEXIM2, CDK5RAP1, LATS1, APC	2906	11	13528	2.9624	1	0.250684	27.1939
GOTERM_BP_FAT	GO:0002377~immunoglobulin production	13	0.357045	0.0165427	EXO1, MSH6, GALNT2, XRCC4, NBN, MSH2, MLH1, LIG4, FOXP1, TRAF3IP2, PMS2, HSPD1, ERCC1	2906	30	13528	2.01725	1	0.250178	27.219
GOTERM_BP_FAT	GO:0003006~reproductive developmental process	72	1.97748	0.0170782	PTGS2, FGF9, HMGCR, LEPR, LHCGR, IDE, ZFP42, RPS6KB1, SHH, TGFB2, INSRR, YBX2, HOOK1, OSR1, ANG, MKKS, ANGPT1, GDF9, FANCG, EIF2B2, FNDC3A, OCA2, TBPL1, SF1, CDKL2, JUNB, INHBB, CCND1, SDC1, CCND2, NCOA4, ADAMTS1, DHH, BBS4, RBP4, HMGB2, HOXA13, CSF1, FKBP4, SOX2, HOXB13, BCL2L1, ZBTB16, TCF7L2, NR2C2, IGF1R, VDR, HSPA2, BCL2, CSDE1, IDH1, FBXO5, STRBP, HSD17B4, LHX9, PCSK4, ERCC1, BMP4, FOXL2, U…	2906	262	13528	1.27929	1	0.25644	27.9702
GOTERM_BP_FAT	GO:0030865~cortical cytoskeleton organization	8	0.21972	0.017106	EPB41L2, LASP1, RHOQ, ARF6, CALR, CDK5, LLGL1, DLG1	2906	14	13528	2.66011	1	0.256051	28.009
GOTERM_BP_FAT	GO:0031960~response to corticosteroid stimulus	28	0.76902	0.0174383	CALCR, CAV1, PTGS2, IGFBP7, PTGS1, RPS6KB1, ASL, FOS, PCSK1, UGT1A9, GOT1, KRAS, BCL2, FOSL1, NEFL, GHR, BMP4, ACADS, BCKDHB, PTPRU, JUNB, PPARGC1B, SDC1, CDKN1A, CCND1, EP300, DUSP1, PDCD7	2906	85	13528	1.53348	1	0.259595	28.4712
GOTERM_BP_FAT	GO:0051493~regulation of cytoskeleton organization	41	1.12606	0.0178415	CAV1, LIMA1, ACTR3B, CAPZA2, EDN1, RHOQ, ARF6, RDX, ARPC5, LATS1, VILL, DSTN, MYCBP2, ACTR3, PFN2, CEP250, ARPC2, MAPT, NPM1, CLASP2, RASA1, APC, STMN3, NF2, SPTBN4, MAP1B, PSRC1, MYO1F, TMSB10, CENPE, BRCA1, ARPC1B, PRKCQ, PLK4, CORO1A, NEB, ARPC5L, NCK1, MAP4, ADD2, SPTAN1	2906	136	13528	1.4034	1	0.264003	29.0281
GOTERM_BP_FAT	GO:0006091~generation of precursor metabolites and energy	84	2.30706	0.018345	UQCRC2, ACOX1, CYB5R4, IL6ST, COX10, PHKB, LEPR, ATP5B, PRKAG2, SNCA, CYC1, PGAM1, PDHB, NDUFS7, NDUFS5, GOT1, PPP1R1A, SLC25A3, ATP5L, ATP5O, ATP6V0D1, DHTKD1, COX17, ATP5H, COX15, ATP5J, FECH, ALDH5A1, ACO1, NDUFC2, CYB5A, NDUFA12, ATP6V1F, NDUFA11, KIAA0100, PPP1CA, NNT, UQCRH, PGM1, GAA, GNAS, ATPIF1, STEAP1, ACAA1, MDH1, UQCRB, NDUFB5, NDUFB6, ECH1, NDUFB8, FDX1, NDUFB9, ALDOC, ATP5G2, ATP5G…	2906	313	13528	1.24932	1	0.269627	29.718
GOTERM_BP_FAT	GO:0010952~positive regulation of peptidase activity	21	0.576765	0.0185658	COL4A3, CARD8, FOXL2, TP53, BCL2L13, STAT1, RPS3, SLC11A2, MEN1, MOAP1, CDKN2A, CASP9, GSPT1, BAX, MTCH1, PYCARD, APAF1, HSPD1, MYC, F2R, HIP1	2906	59	13528	1.65693	1	0.271632	30.0184
GOTERM_BP_FAT	GO:0043280~positive regulation of caspase activity	21	0.576765	0.0185658	COL4A3, CARD8, FOXL2, TP53, BCL2L13, STAT1, RPS3, SLC11A2, MEN1, MOAP1, CDKN2A, CASP9, GSPT1, BAX, MTCH1, PYCARD, APAF1, HSPD1, MYC, F2R, HIP1	2906	59	13528	1.65693	1	0.271632	30.0184
GOTERM_BP_FAT	GO:0009628~response to abiotic stimulus	97	2.6641	0.0185708	XRCC4, HMGCR, CLPB, XRCC6, RPS6KB1, MBIP, TGFB1, APP, MC1R, SLC2A1, H2AFX, EIF2B2, EIF2B3, FECH, POLH, PMCH, GRIN2A, LIG4, JUNB, SAG, PNKP, HSPB1, DCUN1D3, RBP4, CAV1, SOX2, HUS1, KMO, BCL2L1, TIMP3, KRAS, PCYT1A, STRBP, NPHP1, BMP4, TRPC3, TGFBR2, RAD54L, BRCA1, ATM, OBFC2B, CDKN1A, POLD1, CIRBP, LXN, COPS3, IGFBP7, TTPA, MEN1, CASP6, FOS, GPX1, SLC1A2, CASP9, XYLT1, NR2F6, MKKS, FANCG, MYC, FOS…	2906	368	13528	1.22705	1	0.270923	30.0253
GOTERM_BP_FAT	GO:0030036~actin cytoskeleton organization	63	1.73029	0.0190935	RHOJ, LIMA1, WASF3, PDGFB, PREX1, CAPZA2, LMO7, RHOQ, DSTN, NISCH, PACSIN2, ANG, RALA, DLG1, FMNL1, ACTN4, PRKCI, TMSB10, CDK5, LPIN1, VASP, ELMO1, EPB41L2, RND3, RND1, ATP2C1, NCK1, FHOD3, TESK2, DBN1, ADD2, LCP1, CNN3, SSH1, SSH2, FHL3, NEDD9, ARF6, ARPC5, CALR, DAAM2, LLGL1, PFN1, PFN2, KRAS, SORBS1, RAC2, BCL2, BCL6, TRIP10, ARHGDIB, NPHP1, NF2, RACGAP1, GAS7, CORO1A, PPP1R9A, EPS8, ANTXR1, A…	2906	226	13528	1.29769	1	0.276657	30.7316
GOTERM_BP_FAT	GO:0007265~Ras protein signal transduction	33	0.906344	0.0192054	RHOJ, ARHGDIG, USP8, GNA12, MAPKAPK3, SHOC2, RGL2, NISCH, KRAS, ARHGAP5, SOS1, RASGRP1, RASGRP2, ARHGAP1, RALA, RRAS, SHC1, SHC3, RHOG, ARHGDIB, ARHGEF1, YWHAB, RAF1, MAPK11, TAX1BP3, RALGDS, ELMO1, FARP2, MAPK1, LAT, CDH13, ULK1, GNB1	2906	105	13528	1.46306	1	0.277261	30.882
GOTERM_BP_FAT	GO:0006310~DNA recombination	33	0.906344	0.0192054	XRCC4, NBN, HUS1, XRCC6, MLH1, MLH3, RAD51L1, PSIP1, PMS2, H2AFX, ERCC4, ERCC1, EXO1, MSH6, RECQL5, RAD51AP1, MSH2, MSH5, LIG1, EME1, LIG4, TSN, RAD54L, BRCA1, FOXP1, ATM, RAD51, UBE2N, OBFC2B, RECQL, NCOA6, HSPD1, BTBD12	2906	105	13528	1.46306	1	0.277261	30.882
GOTERM_BP_FAT	GO:0017148~negative regulation of translation	14	0.38451	0.0193264	EIF2C2, PRG3, IGF2BP1, IGF2BP3, CALR, YBX2, EIF4EBP3, EIF4EBP1, ANG, TIA1, EIF2B3, SRP9, EIF2C3, IGFBP5	2906	34	13528	1.91685	1	0.277972	31.0443
GOTERM_BP_FAT	GO:0030832~regulation of actin filament length	22	0.60423	0.0195769	LIMA1, ACTR3B, CAPZA2, SPTBN4, RDX, ARF6, TMSB10, ARPC5, LATS1, VILL, DSTN, ACTR3, ARPC1B, CORO1A, PFN2, NEB, ARPC2, NCK1, ARPC5L, RASA1, ADD2, SPTAN1	2906	63	13528	1.62562	1	0.28026	31.3789
GOTERM_BP_FAT	GO:0010243~response to organic nitrogen	22	0.60423	0.0195769	GNAO1, SLC6A1, PTGS2, MSH2, ALDOC, AARS, PTGS1, HMGCS1, GRIN2A, RPS6KB1, ASNS, BCL2L1, SMAD1, TIMP3, BIRC2, SHH, CASP6, GNAL, CCND1, SLC1A2, CDKN1A, NEFL	2906	63	13528	1.62562	1	0.28026	31.3789
GOTERM_BP_FAT	GO:0010639~negative regulation of organelle organization	27	0.741555	0.0198551	LIMA1, CAPZA2, SNCA, RDX, TERF2IP, VILL, SET, MAPT, NPM1, CLASP2, TINF2, ERCC4, ERCC1, TERF2, APC, MAP1B, SPTBN4, TMSB10, CENPE, ATM, BRCA1, CORO1A, MAD2L1, MAP4, MAD2L2, ADD2, SPTAN1	2906	82	13528	1.53281	1	0.282863	31.7488
GOTERM_BP_FAT	GO:0051247~positive regulation of protein metabolic process	67	1.84015	0.0198778	IL6ST, BTRC, PRKAG2, TGFB1, MEN1, PSMD1, PSMD2, PSMD3, PSMD7, CUL1, SAMD4A, RPS27A, PSMD8, SYK, PSMD9, GHR, ANAPC2, BARHL2, UBE2N, PSMA2, MAPK1, CCND1, EP300, PIAS4, CCND2, PIAS3, PSMA5, PSMA3, IL12A, ADAM17, UBB, PIAS1, EIF5A2, CLN6, PSMB10, ATG10, FZR1, CAV1, CSF1, BMPR2, NFKBIA, ANAPC11, STUB1, PIN1, PSMB7, PSMB6, BCL2, RB1CC1, FBXO5, FBXO4, APC, EPO, BMP4, NDFIP1, CDC20, CDC26, CDC27, BRCA1, …	2906	243	13528	1.28353	1	0.282356	31.779
GOTERM_BP_FAT	GO:0051101~regulation of DNA binding	37	1.0162	0.0198879	MTDH, NFKBIA, EGLN1, PRDX3, TGFB1, SHH, RPS3, MEN1, CDKN2A, KRAS, MYD88, NPM1, PYCARD, PEX14, SP100, TAF6, PIM1, SKI, NFAM1, TAF6L, UBE2N, CARD11, SMO, PRKCQ, EP300, ID2, NCOA3, ID1, NME1, EDF1, RIPK2, PBX1, ID3, TSSK4, IKBKB, CALM1, SMARCA4	2906	121	13528	1.42349	1	0.281699	31.7924
GOTERM_BP_FAT	GO:0000375~RNA splicing, via transesterification reactions	45	1.23592	0.0199959	POLR2G, POLR2F, NHP2L1, U2AF2, TRA2A, SNRPB2, RBM5, SNRPD1, POLR2C, SF3B4, POLR2B, YBX1, SF3B3, SF4, SFRS4, SFRS5, CD2BP2, RBM8A, PRMT5, PCBP1, CDC40, U2AF1, SRRM1, LSM2, GEMIN6, GEMIN7, SFRS11, CCAR1, SNRPA1, CSTF3, EFTUD2, SF1, PRPF3, SNW1, SFRS1, SF3A1, SFRS3, PAPOLA, GTF2F1, RSRC1, SNRPB, PHF5A, CPSF3, SNRPE, SNRPG	2906	153	13528	1.36918	1	0.282224	31.9353
GOTERM_BP_FAT	GO:0000377~RNA splicing, via transesterification reactions with bulged adenosine as nucleophile	45	1.23592	0.0199959	POLR2G, POLR2F, NHP2L1, U2AF2, TRA2A, SNRPB2, RBM5, SNRPD1, POLR2C, SF3B4, POLR2B, YBX1, SF3B3, SF4, SFRS4, SFRS5, CD2BP2, RBM8A, PRMT5, PCBP1, CDC40, U2AF1, SRRM1, LSM2, GEMIN6, GEMIN7, SFRS11, CCAR1, SNRPA1, CSTF3, EFTUD2, SF1, PRPF3, SNW1, SFRS1, SF3A1, SFRS3, PAPOLA, GTF2F1, RSRC1, SNRPB, PHF5A, CPSF3, SNRPE, SNRPG	2906	153	13528	1.36918	1	0.282224	31.9353
GOTERM_BP_FAT	GO:0000398~nuclear mRNA splicing, via spliceosome	45	1.23592	0.0199959	POLR2G, POLR2F, NHP2L1, U2AF2, TRA2A, SNRPB2, RBM5, SNRPD1, POLR2C, SF3B4, POLR2B, YBX1, SF3B3, SF4, SFRS4, SFRS5, CD2BP2, RBM8A, PRMT5, PCBP1, CDC40, U2AF1, SRRM1, LSM2, GEMIN6, GEMIN7, SFRS11, CCAR1, SNRPA1, CSTF3, EFTUD2, SF1, PRPF3, SNW1, SFRS1, SF3A1, SFRS3, PAPOLA, GTF2F1, RSRC1, SNRPB, PHF5A, CPSF3, SNRPE, SNRPG	2906	153	13528	1.36918	1	0.282224	31.9353
GOTERM_BP_FAT	GO:0051174~regulation of phosphorus metabolic process	124	3.40566	0.0212862	PDGFB, IL6ST, EFNA1, HMGCR, ADCY6, EDN1, MBIP, TLR6, TGFB1, TGFB2, PRKAR2B, ZGPAT, MAP3K6, MAP3K5, PRKAR2A, APP, CDKN2A, CDKN2B, CDKN2C, PDGFC, CHRNA7, PRKACB, PDGFD, GNG3, MAP2K6, SYK, DEPDC6, ANAPC2, RBL2, MADD, SOCS1, PIM1, PKIB, SPAG9, MAP4K5, CAV1, GNAI2, ERBB2, PFKFB2, BMPR2, MAP4K1, CDC37, CD74, PIN1, KRAS, HEXIM2, NPM1, TRAF6, BMP4, SPHK2, SMAD6, TGFBR2, SPHK1, SMG7, CDKN1C, CDKN1A, PRKAR…	2906	485	13528	1.19019	1	0.296777	33.6221
GOTERM_BP_FAT	GO:0019220~regulation of phosphate metabolic process	124	3.40566	0.0212862	PDGFB, IL6ST, EFNA1, HMGCR, ADCY6, EDN1, MBIP, TLR6, TGFB1, TGFB2, PRKAR2B, ZGPAT, MAP3K6, MAP3K5, PRKAR2A, APP, CDKN2A, CDKN2B, CDKN2C, PDGFC, CHRNA7, PRKACB, PDGFD, GNG3, MAP2K6, SYK, DEPDC6, ANAPC2, RBL2, MADD, SOCS1, PIM1, PKIB, SPAG9, MAP4K5, CAV1, GNAI2, ERBB2, PFKFB2, BMPR2, MAP4K1, CDC37, CD74, PIN1, KRAS, HEXIM2, NPM1, TRAF6, BMP4, SPHK2, SMAD6, TGFBR2, SPHK1, SMG7, CDKN1C, CDKN1A, PRKAR…	2906	485	13528	1.19019	1	0.296777	33.6221
GOTERM_BP_FAT	GO:0051187~cofactor catabolic process	13	0.357045	0.0218354	DLST, ALDH1L1, ACO1, IDH3B, PDHB, IDH3A, KIAA0100, HMOX2, SDHB, UGT1A9, NNT, IDH1, MDH1	2906	31	13528	1.95218	1	0.302391	34.328
GOTERM_BP_FAT	GO:0002440~production of molecular mediator of immune response	13	0.357045	0.0218354	EXO1, MSH6, GALNT2, XRCC4, NBN, MSH2, MLH1, LIG4, FOXP1, TRAF3IP2, PMS2, HSPD1, ERCC1	2906	31	13528	1.95218	1	0.302391	34.328
GOTERM_BP_FAT	GO:0042532~negative regulation of tyrosine phosphorylation of STAT protein	5	0.137325	0.0218918	PPP2R1A, CAV1, NF2, PPP2CA, SOCS1	2906	6	13528	3.87933	1	0.302234	34.4
GOTERM_BP_FAT	GO:0030522~intracellular receptor-mediated signaling pathway	25	0.686625	0.0219938	DCBLD2, CYP24A1, NR3C1, CALR, DAXX, VDR, ALDH1A2, MLL5, RARA, SP100, KLF9, ESR1, ARID1A, ESR2, CDK7, PPARGC1B, BRCA1, MED4, YWHAH, NCOA3, NCOA4, NCOA6, THRAP3, PIAS1, CARM1	2906	75	13528	1.55173	1	0.302606	34.5302
GOTERM_BP_FAT	GO:0000302~response to reactive oxygen species	25	0.686625	0.0219938	STAR, PRDX3, BCL2L1, PRDX1, ADA, PXN, GLRX2, FOS, GPX1, CASP6, ERCC6, BCL2, GPX3, PPP2CB, FOSL1, MB, TXNIP, GNAO1, APTX, STAT1, SOD2, SDC1, EP300, DUSP1, UCP2	2906	75	13528	1.55173	1	0.302606	34.5302
GOTERM_BP_FAT	GO:0016311~dephosphorylation	45	1.23592	0.022327	ILKAP, LPPR4, PDP2, SSH1, CDC14A, SSH2, DUSP11, PPM1B, RNGTT, BCL2, PPP2CA, PPP2CB, PPP3CB, DULLARD, MTMR9, MTMR4, PTPRJ, PPP2R1A, PTPN2, PTPRZ1, PTPRN2, EPM2A, DUSP23, PTPN13, PTPRU, CDKN3, PTPRN, PTPRO, SACM1L, EYA3, PNKP, DUSP4, EYA1, PPM1D, DUSP3, PPP1CA, PPEF2, PPM1J, DUSP1, PTP4A1, DUSP8, PHPT1, DUSP7, DUSP6, PPP5C	2906	154	13528	1.36028	1	0.305633	34.9537
GOTERM_BP_FAT	GO:0043434~response to peptide hormone stimulus	45	1.23592	0.022327	RBP4, PPARA, STAR, PDE3B, RHOQ, RPS6KB1, BCL2L1, ASL, ACVR1C, SLC2A8, IGF1R, PCSK1, EIF4EBP1, GOT1, SORBS1, BCL2, PCSK9, SHC1, EIF2B2, NEFL, CCNA2, EIF2B3, NUDC, GHR, SOCS2, PTPN2, BAIAP2, MAP1B, SOCS1, GGH, PRKCI, FBP1, STAT1, PTPRN, LPIN1, JUNB, STAT3, PRKCQ, GRB10, CCND2, GSK3A, SORT1, HDAC9, ABCC5, VLDLR	2906	154	13528	1.36028	1	0.305633	34.9537
GOTERM_BP_FAT	GO:0021532~neural tube patterning	10	0.27465	0.022549	HES1, BMP4, SMO, GSC, TULP3, PAX7, GBX2, EN1, GAS1, SHH	2906	21	13528	2.21676	1	0.307361	35.2345
GOTERM_BP_FAT	GO:0045884~regulation of survival gene product expression	10	0.27465	0.022549	MEF2C, CDH13, BAX, BNIP3L, ESR1, BNIP3, BCL2L1, ESR2, NKX2-5, MYC	2906	21	13528	2.21676	1	0.307361	35.2345
GOTERM_BP_FAT	GO:0051129~negative regulation of cellular component organization	42	1.15353	0.0225587	LIMA1, CAPZA2, SNCA, RHOQ, ARF6, RDX, TERF2IP, VILL, TGFB1, EPHB2, EIF4EBP1, SET, PACSIN2, MAPT, SEMA3F, NPM1, CLASP2, SEMA3A, ERCC4, TINF2, TERF2, ERCC1, APC, ARHGEF1, SMAD6, SPTBN4, MAP1B, RTN4R, TMSB10, CENPE, BRCA1, ATM, CORO1A, RNF6, MAD2L1, YWHAH, ULK1, MAP4, MAD2L2, OMG, ADD2, SPTAN1	2906	142	13528	1.37689	1	0.30666	35.2467
GOTERM_BP_FAT	GO:0032880~regulation of protein localization	41	1.12606	0.0225999	ARHGDIG, RBP4, ACHE, PANX1, NFKBIE, NFKBIA, RHOQ, CDH1, CDH2, KRT20, GLI3, PRDX1, TGFB1, SHH, MYCBP2, TGFB2, PCSK1, SORBS1, ANG, BCL2, PYCARD, RAB11A, TRAF6, APC, BMP4, SERGEF, CARD8, YWHAB, NDFIP1, PRKCI, CENPE, CDK5, RSL1D1, SLC26A4, SMO, PRKCQ, GLMN, FAF1, MBTPS1, LCP1, BMPR1A	2906	138	13528	1.38307	1	0.306321	35.2986
GOTERM_BP_FAT	GO:0009416~response to light stimulus	41	1.12606	0.0225999	RBP4, HMGCR, COPS3, HUS1, MEN1, ERCC8, FOS, GPX1, SLC1A2, APP, ERCC6, KRAS, CASP9, MC1R, BCL2, NR2F6, ERCC4, ERCC1, FEN1, NPHP1, MSH6, FECH, TRPC3, POLH, MAT2A, MSH2, ATP1A3, GRIN2A, TP53, CDK5, JUNB, SAG, XPA, CCND1, CDKN1A, XPC, DUSP1, POLD1, BAX, IL12A, DCUN1D3	2906	138	13528	1.38307	1	0.306321	35.2986
GOTERM_BP_FAT	GO:0006352~transcription initiation	27	0.741555	0.0231627	POLR2G, E2F3, POLR2F, TBP, POLR2C, POLR2B, MAZ, RTF1, MYC, GTF3C4, TBPL1, BRF1, TAF6, BRF2, CDK9, TTF1, CDK7, TRIM24, TAF6L, GTF2B, TAF11, TAF13, MED4, GTF2F1, NCOA6, THRAP3, SMARCA5	2906	83	13528	1.51434	1	0.311869	36.0046
GOTERM_BP_FAT	GO:0009116~nucleoside metabolic process	22	0.60423	0.0233972	COASY, FHIT, ERH, OCLN, MAT2A, HMGCR, NT5C1A, DGUOK, PRPSAP1, TPMT, ADA, NME7, PANK4, UMPS, PANK3, NME1, PANK1, DHODH, MAT2B, FPGS, TBPL1, DUT	2906	64	13528	1.60022	1	0.313682	36.2966
GOTERM_BP_FAT	GO:0000279~M phase	87	2.38945	0.0235926	MAD1L1, LZTS2, NBN, PRC1, TUBB2A, ZFP42, MLH1, AURKB, MLH3, PTTG1, LATS1, CD2AP, KIF2C, MC1R, TARDBP, H2AFX, DYNC1H1, USP16, CCNA2, ASPM, STAG1, ANAPC2, KIF11, SGOL1, TPX2, NUSAP1, UBR2, PBK, DCTN3, WEE1, CDK2, RAD51, EML4, DCTN2, MAD2L1, RCC2, SPAG5, FANCD2, C14ORF106, MAPRE2, AKAP8, NEK4, MAD2L2, CHFR, NUP43, NEK6, PPP5C, FZR1, NEK2, CETN3, NEDD9, ANAPC11, RCC1, NIPBL, HSPA2, RAD51L1, KATNA1, O…	2906	329	13528	1.23101	1	0.315045	36.5389
GOTERM_BP_FAT	GO:0051591~response to cAMP	16	0.43944	0.0240694	MAT2A, BCKDHB, C1S, PTPRN, ASL, STAT1, BIRC2, PPARGC1B, JUNB, FOS, SDC1, DUSP1, PYGM, CCND2, NME1, FOSL1	2906	42	13528	1.77341	1	0.319504	37.1266
GOTERM_BP_FAT	GO:0032271~regulation of protein polymerization	23	0.631695	0.0242999	CAV1, ACTR3B, CAPZA2, SPTBN4, MAP1B, PSRC1, RDX, ARF6, TMSB10, ARPC5, LATS1, VILL, ACTR3, ARPC1B, CORO1A, ARPC2, NCK1, ARPC5L, MAPT, RASA1, ADD2, APC, SPTAN1	2906	68	13528	1.57455	1	0.321215	37.4088
GOTERM_BP_FAT	GO:0009303~rRNA transcription	9	0.247185	0.0245475	CD3EAP, GTF3A, BRF1, CDKN2A, ANG, TP53, MKI67IP, SIRT7, GTF3C4	2906	18	13528	2.3276	1	0.323097	37.7106
GOTERM_BP_FAT	GO:0001657~ureteric bud development	14	0.38451	0.0248499	BMP4, RET, GREM1, GLI3, SHH, BDNF, EYA1, SPRY1, CD44, LAMA5, BCL2, SALL1, PBX1, RARB	2906	35	13528	1.86208	1	0.325558	38.0774
GOTERM_BP_FAT	GO:0050885~neuromuscular process controlling balance	14	0.38451	0.0248499	NBN, GM2A, AARS, SOX2, APLP2, APP, TPP1, GAA, POU4F3, POU4F2, POU4F1, NEFL, CACNA1A, MYH10	2906	35	13528	1.86208	1	0.325558	38.0774
GOTERM_BP_FAT	GO:0048145~regulation of fibroblast proliferation	14	0.38451	0.0248499	XRCC4, NBN, FOSL2, PDGFB, SPHK1, TP53, CDK6, LIG4, SOD2, FNTB, CDKN1A, BAX, PDGFC, CCNA2	2906	35	13528	1.86208	1	0.325558	38.0774
GOTERM_BP_FAT	GO:0009060~aerobic respiration	14	0.38451	0.0248499	UQCRC2, DLST, ACO1, COX10, IDH3B, PDHB, IDH3A, KIAA0100, SDHB, NNT, UQCRH, IDH1, UQCRB, MDH1	2906	35	13528	1.86208	1	0.325558	38.0774
GOTERM_BP_FAT	GO:0051090~regulation of transcription factor activity	32	0.878879	0.0249063	MTDH, NFKBIA, EGLN1, PRDX3, TGFB1, SHH, RPS3, MEN1, CDKN2A, KRAS, MYD88, NPM1, PYCARD, PEX14, SP100, TAF6, PIM1, NFAM1, TAF6L, UBE2N, PRKCQ, CARD11, EP300, ID2, NCOA3, ID1, RIPK2, PBX1, ID3, TSSK4, IKBKB, SMARCA4	2906	103	13528	1.44627	1	0.325344	38.1456
GOTERM_BP_FAT	GO:0051789~response to protein stimulus	33	0.906344	0.0250951	BAT5, DERL1, SKIV2L, DEK, BCL2L1, NR3C1, VARS, TGFB1, ACTR3, FOS, PCSK1, HSPA2, BCL2, TOR1A, DNAJC4, DDAH2, DNAJC3, CYR61, HERPUD1, MSH5, MAP1B, AARS, CSNK2B, CCND1, MSX1, ID2, ID1, HSPB1, DNAJB2, ID3, NFE2L2, HSPD1, DNAJB6	2906	107	13528	1.43571	1	0.326555	38.3732
GOTERM_BP_FAT	GO:0060348~bone development	37	1.0162	0.0254548	CYP24A1, TWSG1, OSTF1, ACHE, PTGS2, FGF9, TUFT1, COL2A1, TGFB1, SHH, GLI1, MEN1, CTGF, BCL2, ANKRD11, JUND, TRAF6, GHR, IHH, BMP4, BMP3, BMP1, SMAD5, HSPG2, SMAD1, WWTR1, SMO, MEF2D, HOXB4, SP1, NAB2, SP3, SORT1, GNAS, CHRD, IGFBP3, IGFBP5	2906	123	13528	1.40034	1	0.329583	38.8049
GOTERM_BP_FAT	GO:0033205~cytokinesis during cell cycle	6	0.16479	0.0263228	BBS4, NUSAP1, RACGAP1, DAXX, MYH10, APC	2906	9	13528	3.10346	1	0.337944	39.8347
GOTERM_BP_FAT	GO:0009636~response to toxin	21	0.576765	0.0267507	CYP1A1, SLC6A1, SLC6A4, MAP1B, SLC7A8, CDH1, RPS6KB1, SRF, TYMS, GPX1, FOS, XPA, BLMH, SDC1, CDKN1A, ERCC6, BAX, BCL2, IKBKB, NEFL, MT1H	2906	61	13528	1.60261	1	0.341584	40.3363
GOTERM_BP_FAT	GO:0008064~regulation of actin polymerization or depolymerization	21	0.576765	0.0267507	LIMA1, ACTR3B, CAPZA2, SPTBN4, RDX, ARF6, TMSB10, ARPC5, LATS1, VILL, DSTN, ACTR3, ARPC1B, CORO1A, PFN2, ARPC2, ARPC5L, NCK1, RASA1, ADD2, SPTAN1	2906	61	13528	1.60261	1	0.341584	40.3363
GOTERM_BP_FAT	GO:0021511~spinal cord patterning	7	0.192255	0.0271286	SMO, TULP3, RAB23, GLI3, CHRD, SHH, NKX6-1	2906	12	13528	2.71553	1	0.344668	40.7761
GOTERM_BP_FAT	GO:0032204~regulation of telomere maintenance	7	0.192255	0.0271286	TERF2IP, ERCC4, TINF2, MYC, ERCC1, TERF2, TNKS2	2906	12	13528	2.71553	1	0.344668	40.7761
GOTERM_BP_FAT	GO:0050680~negative regulation of epithelial cell proliferation	11	0.302115	0.0277091	CDKN1C, CDKN2B, WFDC1, CDK6, KRT4, GAS1, ESR2, TINF2, TGFB1, TGFB2, APC	2906	25	13528	2.04829	1	0.349798	41.4455
GOTERM_BP_FAT	GO:0032868~response to insulin stimulus	31	0.851414	0.0282063	PPARA, RBP4, STAR, RHOQ, PDE3B, RPS6KB1, ACVR1C, SLC2A8, IGF1R, EIF4EBP1, GOT1, SORBS1, PCSK9, SHC1, GHR, PTPN2, BAIAP2, GGH, PRKCI, FBP1, STAT1, PTPRN, LPIN1, PRKCQ, GRB10, CCND2, GSK3A, SORT1, HDAC9, ABCC5, VLDLR	2906	100	13528	1.44311	1	0.354015	42.0132
GOTERM_BP_FAT	GO:0031099~regeneration	23	0.631695	0.0286422	INA, ALDOC, MAP1B, SOCS1, NINJ1, PTPRU, TIMP3, TGFB1, GAS6, SMO, GPX1, PRKCQ, CCND1, CDKN1A, LAMB2, PAX7, BCL2, ENO3, RTN4RL2, ANGPT1, LRP2, CCNA2, NEFL	2906	69	13528	1.55173	1	0.357566	42.5066
GOTERM_BP_FAT	GO:0035270~endocrine system development	23	0.631695	0.0286422	BMP4, SOX2, PDE3B, CDH1, NR3C1, ISL1, MDK, NKX6-1, GLI1, HES1, GATA2, PCSK1, ALDH1A2, HHEX, GCM2, EYA1, PROP1, LY6E, GHRH, ALDH1A3, NEUROD1, PBX1, NKX2-5	2906	69	13528	1.55173	1	0.357566	42.5066
GOTERM_BP_FAT	GO:0008361~regulation of cell size	57	1.5655	0.0294825	PDGFB, EDN1, TGFB1, TGFB2, ACVR1B, APP, ARHGAP5, CDKN2A, CDKN2C, MAPT, SEMA3F, POU4F3, SERTAD3, POU4F2, GDF9, SEMA3A, GNG4, SERTAD1, SERTAD2, DEPDC6, PPP2R1A, ADAM10, CGRRF1, SLC3A2, TP53, ADIPOR1, ESR2, EP300, PRDM4, WFDC1, ADAM17, DCUN1D3, C6ORF108, XRN2, DCBLD2, TNFRSF12A, SIPA1, PPT1, GREM1, LAMB2, NDRG4, PPP2CA, BCL2, RB1CC1, NPM1, BCL6, ING1, IL7, SPHK1, MAP1B, PSRC1, CSRP2, RNF6, CDKN1A, U…	2906	206	13528	1.28809	1	0.365105	43.4465
GOTERM_BP_FAT	GO:0010648~negative regulation of cell communication	67	1.84015	0.0302264	SLC6A1, PTGS2, IL6ST, FGF9, PDE3B, PAWR, MEN1, ZGPAT, KCNQ4, HEY2, IHH, DEPDC6, PPP2R1A, GSC, STMN3, SOCS2, PMCH, C9ORF89, STRN3, SOCS1, STXBP1, CTNNBIP1, HHEX, GRB10, CCND1, NPC1, TNFAIP3, GRB14, TWSG1, CAV1, ACHE, GNAI3, GNAI2, SOX2, NFKBIA, CXXC4, PRDM16, GREM1, CALR, ADA, PIN1, PEG10, OVOL2, PPP2CA, PPP2CB, BCL6, INPP5D, SKIL, APC, CARD8, NF2, SMAD6, TAOK3, RGS19, SKI, GAS1, TAX1BP3, LRP1, TU…	2906	248	13528	1.25765	1	0.371575	44.2665
GOTERM_BP_FAT	GO:0045860~positive regulation of protein kinase activity	61	1.67536	0.030439	PDGFB, EFNA1, PRKAG1, PRKAG2, EDN1, ADCY6, SDC4, TLR6, DAXX, TGFB1, TGFB2, MAP3K6, PRKAR2B, MAP3K5, PRKAR2A, ANG, TGFA, SHC1, PDGFC, CHRNA7, GNG3, PRKACB, PAK1, MAP2K6, SYK, GHR, MADD, PIM1, PKN1, CDK5, GRM1, PROK2, SPAG9, CCND1, MAP4K5, CCND2, ADAM17, GNAI2, ERBB2, CSF1, MAP4K1, CD74, KRAS, ERCC6, DGKG, NPM1, CERK, TRAF6, DGKQ, SPHK2, SPHK1, TGFBR2, DGKH, CENPE, DGKI, LRP1, PRKAR1B, PRKAR1A, MAP…	2906	223	13528	1.27339	1	0.372778	44.4987
GOTERM_BP_FAT	GO:0043525~positive regulation of neuron apoptosis	10	0.27465	0.031056	CASP6, EPHA7, CASP9, BAX, TP53, PCSK9, NR3C1, CDK5, ATM, TGFB2	2906	22	13528	2.116	1	0.377891	45.1676
GOTERM_BP_FAT	GO:0001947~heart looping	10	0.27465	0.031056	BBS4, BBS5, LBX1, TBX3, HAND2, GATA4, MKKS, SRF, NKX2-5, SHH	2906	22	13528	2.116	1	0.377891	45.1676
GOTERM_BP_FAT	GO:0006605~protein targeting	59	1.62043	0.0313153	GRPEL2, GRPEL1, PDIA3, FGF9, LHCGR, SYNGR1, GLI3, TGFB1, TGFB2, SSR1, IMMP2L, HOMER3, TIMM9, RPL11, AP3B1, MYO6, PRKCI, TP53, IPO8, TIMM23, NUPL2, TIMM8B, MAPK1, SEC61B, ATG4C, IPO7, IPO4, NUP205, PEX26, KPNA5, KPNA3, SRP9, PACS1, YWHAZ, CACNB1, TIMM10, NFKBIA, POLA2, CALR, CDC37, PEX19, CSE1L, PEX16, PPP3CB, PEX14, BCL6, PEX13, SEC61A1, SRP54, IPO13, YWHAB, TOMM40, GABARAP, TRNT1, PPIH, PRICKLE1…	2906	215	13528	1.27747	1	0.379507	45.4464
GOTERM_BP_FAT	GO:0031344~regulation of cell projection organization	28	0.76902	0.0314172	BBS4, EFNA1, TNFRSF12A, RHOQ, CDH2, TTL, EPHB2, ACTR3, SEMA3F, MAPT, NUMB, RALA, SEMA3A, NEFL, APC, ARHGEF1, BARHL2, MAP1B, RTN4R, SMAD1, PRKCQ, RNF6, YWHAH, NDEL1, ULK1, OMG, DBN1, CACNA1A	2906	89	13528	1.46456	1	0.379605	45.5556
GOTERM_BP_FAT	GO:0034284~response to monosaccharide stimulus	17	0.466905	0.0318371	TXNIP, COL4A3, PTGS2, PFKFB2, TGFBR2, RPS6KB1, PTPRN, TGFB1, ACVR1C, PCSK1, PRKCQ, CASP6, SARM1, COL6A2, NEUROD1, EIF2B2, EIF2B3	2906	47	13528	1.68379	1	0.382732	46.0034
GOTERM_BP_FAT	GO:0051302~regulation of cell division	17	0.466905	0.0318371	FGF5, BBS4, PDGFB, FGF9, CP110, MDK, TGFB1, TGFB2, MEN1, VEGFB, TGFA, PDGFC, PDGFD, FGF3, ASPM, CALM1, APC	2906	47	13528	1.68379	1	0.382732	46.0034
GOTERM_BP_FAT	GO:0009746~response to hexose stimulus	17	0.466905	0.0318371	TXNIP, COL4A3, PTGS2, PFKFB2, TGFBR2, RPS6KB1, PTPRN, TGFB1, ACVR1C, PCSK1, PRKCQ, CASP6, SARM1, COL6A2, NEUROD1, EIF2B2, EIF2B3	2906	47	13528	1.68379	1	0.382732	46.0034
GOTERM_BP_FAT	GO:0006470~protein amino acid dephosphorylation	39	1.07113	0.0319148	ILKAP, PDP2, SSH1, CDC14A, SSH2, DUSP11, PPM1B, RNGTT, BCL2, PPP2CA, PPP2CB, PPP3CB, DULLARD, MTMR4, PTPRJ, PPP2R1A, PTPN2, PTPRZ1, PTPRN2, EPM2A, DUSP23, PTPN13, PTPRU, PTPRN, PTPRO, EYA3, DUSP4, EYA1, DUSP3, PPP1CA, PPM1D, PPEF2, PPM1J, DUSP1, PTP4A1, DUSP8, DUSP7, DUSP6, PPP5C	2906	133	13528	1.36506	1	0.38259	46.0859
GOTERM_BP_FAT	GO:0002009~morphogenesis of an epithelium	31	0.851414	0.03212	BBS4, DAG1, PTK7, HOXB13, PAX3, GREM1, GLI3, SHH, PFN1, ALDH1A2, CD44, OVOL2, BCL2, ALDH1A3, FOXF1, CASP8, MKKS, TRAF6, IPMK, TWIST1, BMP4, RET, TBX5, FZD3, CELSR1, VASP, HOXB4, EYA1, LAMA5, PBX1, APAF1	2906	101	13528	1.42882	1	0.383654	46.3032
GOTERM_BP_FAT	GO:0042278~purine nucleoside metabolic process	12	0.32958	0.0321772	PANK4, FHIT, COASY, PANK3, OCLN, MAT2A, HMGCR, PANK1, MAT2B, DGUOK, TPMT, ADA	2906	29	13528	1.92629	1	0.383318	46.3636
GOTERM_BP_FAT	GO:0046128~purine ribonucleoside metabolic process	12	0.32958	0.0321772	PANK4, FHIT, COASY, PANK3, OCLN, MAT2A, HMGCR, PANK1, MAT2B, DGUOK, TPMT, ADA	2906	29	13528	1.92629	1	0.383318	46.3636
GOTERM_BP_FAT	GO:0030199~collagen fibril organization	12	0.32958	0.0321772	LMX1B, P4HA1, LUM, COL12A1, COL2A1, LOX, ADAMTS3, COL11A2, ADAMTS2, DPT, TGFB2, ANXA2	2906	29	13528	1.92629	1	0.383318	46.3636
GOTERM_BP_FAT	GO:0000281~cytokinesis after mitosis	4	0.10986	0.0332083	NUSAP1, DAXX, MYH10, APC	2906	4	13528	4.6552	1	0.39207	47.4415
GOTERM_BP_FAT	GO:0051891~positive regulation of cardioblast differentiation	4	0.10986	0.0332083	GATA6, TBX5, NKX2-5, TGFB2	2906	4	13528	4.6552	1	0.39207	47.4415
GOTERM_BP_FAT	GO:0042518~negative regulation of tyrosine phosphorylation of Stat3 protein	4	0.10986	0.0332083	PPP2R1A, NF2, PPP2CA, SOCS1	2906	4	13528	4.6552	1	0.39207	47.4415
GOTERM_BP_FAT	GO:0051890~regulation of cardioblast differentiation	4	0.10986	0.0332083	GATA6, TBX5, NKX2-5, TGFB2	2906	4	13528	4.6552	1	0.39207	47.4415
GOTERM_BP_FAT	GO:0043388~positive regulation of DNA binding	23	0.631695	0.0335473	SP100, MTDH, SKI, NFAM1, PRDX3, SHH, TGFB1, UBE2N, CARD11, PRKCQ, EP300, KRAS, MYD88, NCOA3, NME1, NPM1, PYCARD, EDF1, RIPK2, TSSK4, IKBKB, CALM1, SMARCA4	2906	70	13528	1.52956	1	0.394316	47.7914
GOTERM_BP_FAT	GO:0010975~regulation of neuron projection development	23	0.631695	0.0335473	ARHGEF1, EFNA1, TNFRSF12A, MAP1B, BARHL2, RTN4R, CDH2, SMAD1, TTL, EPHB2, ACTR3, RNF6, YWHAH, NDEL1, ULK1, MAPT, SEMA3F, NUMB, SEMA3A, OMG, DBN1, NEFL, CACNA1A	2906	70	13528	1.52956	1	0.394316	47.7914
GOTERM_BP_FAT	GO:0014031~mesenchymal cell development	18	0.49437	0.0335739	NRP2, RET, EDN1, TRIM28, PAX3, ISL1, SHH, TGFB1, TGFB2, SMO, ALDH1A2, OVOL2, HAND2, LAMA5, BCL2, SEMA3F, GBX2, SEMA3C	2906	51	13528	1.64301	1	0.393677	47.8188
GOTERM_BP_FAT	GO:0048762~mesenchymal cell differentiation	18	0.49437	0.0335739	NRP2, RET, EDN1, TRIM28, PAX3, ISL1, SHH, TGFB1, TGFB2, SMO, ALDH1A2, OVOL2, HAND2, LAMA5, BCL2, SEMA3F, GBX2, SEMA3C	2906	51	13528	1.64301	1	0.393677	47.8188
GOTERM_BP_FAT	GO:0030029~actin filament-based process	65	1.78522	0.033785	RHOJ, LIMA1, WASF3, PDGFB, PREX1, CAPZA2, LMO7, RHOQ, DSTN, NISCH, PACSIN2, ANG, RALA, DLG1, FMNL1, MYO6, ACTN4, PRKCI, TMSB10, CDK5, LPIN1, VASP, ELMO1, EPB41L2, RND3, RND1, ATP2C1, NCK1, FHOD3, TESK2, DBN1, ADD2, LCP1, MYO5A, CNN3, SSH1, SSH2, FHL3, NEDD9, ARF6, ARPC5, CALR, DAAM2, LLGL1, PFN1, PFN2, KRAS, SORBS1, RAC2, BCL2, BCL6, TRIP10, ARHGDIB, NPHP1, NF2, RACGAP1, GAS7, CORO1A, PPP1R9A, EP…	2906	241	13528	1.25555	1	0.394732	48.0355
GOTERM_BP_FAT	GO:0021587~cerebellum morphogenesis	9	0.247185	0.0345996	SMO, LMX1B, ULK1, LHX5, GAS1, RORA, CDK5, CACNA1A, GLI1	2906	19	13528	2.20509	1	0.401255	48.8636
GOTERM_BP_FAT	GO:0007098~centrosome cycle	9	0.247185	0.0345996	KIF11, CEP250, NEK2, NPM1, CETN3, TUBE1, CP110, GADD45A, BRCA1	2906	19	13528	2.20509	1	0.401255	48.8636
GOTERM_BP_FAT	GO:0033365~protein localization in organelle	42	1.15353	0.034812	PACS1, BBS4, GRPEL2, YWHAZ, GRPEL1, PDIA3, FGF9, TIMM10, NFKBIA, POLA2, GLI3, TGFB1, RAB3IP, TGFB2, IMMP2L, CSE1L, TIMM9, PPP3CB, BCL6, SUPT7L, SEC61A1, SRP54, IPO13, TP53, TOMM40, IPO8, TIMM23, TIMM8B, COG3, TRNT1, MAPK1, PPIH, SEC61B, PRICKLE1, TOMM70A, IPO7, IPO4, NUP205, KPNA5, KPNA3, SRP9, F2R	2906	146	13528	1.33917	1	0.402283	49.0775
GOTERM_BP_FAT	GO:0006119~oxidative phosphorylation	30	0.823949	0.0363441	UQCRC2, NDUFB5, NDUFB6, COX10, NDUFB8, ATP5B, NDUFB9, SNCA, ATP5G2, ATP6V1B2, ATP5G1, ATP6V0B, NDUFB2, NDUFS7, NDUFS5, ATP5L, ATP5O, ATP6V0D1, ATP5H, ATP5J, COX15, NDUFA4, NDUFA5, NDUFA9, MSH2, NDUFC2, ATP6V1F, UQCRH, NDUFV2, UQCRB	2906	98	13528	1.42506	1	0.415013	50.5952
GOTERM_BP_FAT	GO:0007568~aging	33	0.906344	0.0364569	ALDOC, PTGS1, RPS6KB1, IL15, CALR, SRF, TIMP3, ADA, TGFB1, FOS, SLC1A2, CDKN2A, KRAS, BCL2, NPM1, ENO3, INPP5D, LOXL2, TERF2, ERCC1, PHOX2A, MSH6, GNAO1, TBX3, SOCS2, MSH2, TP53, SOD2, PRKCQ, LRP1, CTSC, CP, LRP2	2906	110	13528	1.39656	1	0.415104	50.7052
GOTERM_BP_FAT	GO:0009109~coenzyme catabolic process	11	0.302115	0.0365889	KIAA0100, DLST, SDHB, NNT, ALDH1L1, ACO1, IDH3B, IDH1, IDH3A, PDHB, MDH1	2906	26	13528	1.96951	1	0.415361	50.8337
GOTERM_BP_FAT	GO:0031124~mRNA 3'-end processing	8	0.21972	0.0381731	ZFP36, ZC3H3, APP, PAPOLA, CSTF3, MLH1, CPSF3, SLBP	2906	16	13528	2.3276	1	0.428141	52.3509
GOTERM_BP_FAT	GO:0051412~response to corticosterone stimulus	8	0.21972	0.0381731	FOS, CDKN1A, CCND1, BCL2, PTGS1, NEFL, FOSL1, JUNB	2906	16	13528	2.3276	1	0.428141	52.3509
GOTERM_BP_FAT	GO:0015800~acidic amino acid transport	8	0.21972	0.0381731	SLC25A12, SLC17A8, SLC1A2, SLC6A1, SLC25A22, SLC13A3, ARL6IP5, SLC1A1	2906	16	13528	2.3276	1	0.428141	52.3509
GOTERM_BP_FAT	GO:0007090~regulation of S phase of mitotic cell cycle	8	0.21972	0.0381731	ILKAP, CYP1A1, SMAD6, BCL6, GAS1, DCUN1D3, RCC1, SMARCA4	2906	16	13528	2.3276	1	0.428141	52.3509
GOTERM_BP_FAT	GO:0010563~negative regulation of phosphorus metabolic process	17	0.466905	0.0385208	PPP2R1A, CAV1, NF2, SMAD6, SOCS1, YWHAB, TGFB1, MEN1, CDKN1C, CDKN1A, CDKN2A, CDKN2B, CDKN2C, PPP2CA, BAX, ATXN7, IGFBP3	2906	48	13528	1.64872	1	0.430189	52.6779
GOTERM_BP_FAT	GO:0045936~negative regulation of phosphate metabolic process	17	0.466905	0.0385208	PPP2R1A, CAV1, NF2, SMAD6, SOCS1, YWHAB, TGFB1, MEN1, CDKN1C, CDKN1A, CDKN2A, CDKN2B, CDKN2C, PPP2CA, BAX, ATXN7, IGFBP3	2906	48	13528	1.64872	1	0.430189	52.6779
GOTERM_BP_FAT	GO:0001667~ameboidal cell migration	14	0.38451	0.0392361	NRP2, RET, PAX3, ISL1, MIXL1, SHH, SMO, OVOL2, LAMA5, SEMA3F, GBX2, LRP6, SEMA3C, LRP5	2906	37	13528	1.76143	1	0.435313	53.3439
GOTERM_BP_FAT	GO:0051648~vesicle localization	14	0.38451	0.0392361	ARFGAP1, BBS4, BBS5, COPZ1, VPS33B, ARL6, VPS33A, COPB2, MKKS, LRMP, TMED10, SNAP23, YKT6, COPE	2906	37	13528	1.76143	1	0.435313	53.3439
GOTERM_BP_FAT	GO:0048732~gland development	39	1.07113	0.0395885	CAV1, BCAT2, HOXA13, ERBB2, SOX2, HOXB13, CDH1, NR3C1, MDK, GLI3, TGFB1, SHH, TGFB2, GLI1, IGF1R, PCSK1, GATA2, ALDH1A2, PROP1, LY6E, BCL2, ALDH1A3, HOXA9, NKX2-5, BMP4, TBX3, PMCH, ISL1, HOXD9, HES1, HHEX, EYA1, GCM2, SFRP1, NME1, LAMA5, GHRH, IRF6, PBX1	2906	135	13528	1.34483	1	0.437348	53.6689
GOTERM_BP_FAT	GO:0017038~protein import	38	1.04367	0.0398941	GRPEL2, YWHAZ, GRPEL1, PDIA3, FGF9, TIMM10, NFKBIA, POLA2, GLI3, TGFB1, TGFB2, IMMP2L, CSE1L, PEX16, TIMM9, PPP3CB, PEX14, BCL6, PEX13, IPO13, TP53, TOMM40, IPO8, TIMM23, TIMM8B, TRNT1, MAPK1, PPIH, SEC61B, PRICKLE1, TOMM70A, IPO7, NUP205, IPO4, PEX26, KPNA5, KPNA3, F2R	2906	131	13528	1.35036	1	0.438976	53.9489
GOTERM_BP_FAT	GO:0060485~mesenchyme development	18	0.49437	0.0402064	NRP2, RET, EDN1, TRIM28, PAX3, ISL1, SHH, TGFB1, TGFB2, SMO, ALDH1A2, OVOL2, HAND2, LAMA5, BCL2, SEMA3F, GBX2, SEMA3C	2906	52	13528	1.61141	1	0.440647	54.2333
GOTERM_BP_FAT	GO:0016050~vesicle organization	18	0.49437	0.0402064	ARFGAP1, CAV1, GNAI3, AP2S1, COPZ1, STXBP1, EEA1, VPS33B, EPS15, COPB2, CORO1A, BLOC1S3, BCL2, SORT1, FBXO5, LRMP, COPE, HIP1	2906	52	13528	1.61141	1	0.440647	54.2333
GOTERM_BP_FAT	GO:0001503~ossification	34	0.933809	0.0408473	CYP24A1, TWSG1, OSTF1, ACHE, PTGS2, FGF9, TUFT1, COL2A1, TGFB1, SHH, GLI1, MEN1, CTGF, BCL2, JUND, TRAF6, IHH, BMP4, BMP3, BMP1, SMAD5, HSPG2, SMAD1, WWTR1, SMO, MEF2D, SP1, NAB2, SP3, SORT1, GNAS, CHRD, IGFBP3, IGFBP5	2906	115	13528	1.37632	1	0.444994	54.8119
GOTERM_BP_FAT	GO:0080135~regulation of cellular response to stress	31	0.851414	0.0411723	EDN1, MAP4K1, TLR6, PRDX1, DAXX, RPS3, TGFB2, MEN1, MAP3K6, ERCC8, MAP3K5, ERCC6, NPM1, H2AFX, PAK1, SYK, POLH, BECN1, TAOK3, PKN1, PRKCG, BRCA1, UBE2N, EYA3, NPC1, MAP4K5, EYA1, NDEL1, SEMA4C, MAPK8IP3, RIPK2	2906	103	13528	1.40108	1	0.446727	55.1026
GOTERM_BP_FAT	GO:0021549~cerebellum development	12	0.32958	0.0412288	SMO, LMX1B, ULK1, GBX2, LHX5, NEUROD1, GAS1, RORA, CDK5, CACNA1A, MYH10, GLI1	2906	30	13528	1.86208	1	0.446272	55.153
GOTERM_BP_FAT	GO:0030866~cortical actin cytoskeleton organization	7	0.192255	0.0414076	EPB41L2, RHOQ, ARF6, CALR, CDK5, LLGL1, DLG1	2906	13	13528	2.50664	1	0.446808	55.312
GOTERM_BP_FAT	GO:0033674~positive regulation of kinase activity	62	1.70283	0.0415356	PDGFB, EFNA1, PRKAG1, PRKAG2, EDN1, ADCY6, SDC4, TLR6, DAXX, TGFB1, TGFB2, MAP3K6, PRKAR2B, MAP3K5, PRKAR2A, ANG, TGFA, SHC1, PDGFC, CHRNA7, GNG3, PRKACB, PAK1, MAP2K6, SYK, GHR, MADD, PIM1, PKN1, CDK5, GRM1, SPAG9, PROK2, CCND1, MAP4K5, CCND2, ADAM17, GNAI2, PFKFB2, ERBB2, CSF1, MAP4K1, CD74, KRAS, ERCC6, DGKG, NPM1, CERK, TRAF6, DGKQ, SPHK2, SPHK1, TGFBR2, DGKH, CENPE, DGKI, LRP1, PRKAR1B, PRKA…	2906	231	13528	1.24945	1	0.446932	55.4255
GOTERM_BP_FAT	GO:0021575~hindbrain morphogenesis	10	0.27465	0.0415577	HES1, SMO, LMX1B, ULK1, LHX5, GAS1, RORA, CDK5, CACNA1A, GLI1	2906	23	13528	2.024	1	0.446204	55.4451
GOTERM_BP_FAT	GO:0046356~acetyl-CoA catabolic process	10	0.27465	0.0415577	KIAA0100, DLST, SDHB, NNT, ACO1, IDH3B, IDH1, IDH3A, PDHB, MDH1	2906	23	13528	2.024	1	0.446204	55.4451
GOTERM_BP_FAT	GO:0007031~peroxisome organization	10	0.27465	0.0415577	PEX11A, PEX11B, ACOT8, PEX19, PEX26, PEX16, ABCD3, PEX14, PEX13, SCP2	2906	23	13528	2.024	1	0.446204	55.4451
GOTERM_BP_FAT	GO:0006099~tricarboxylic acid cycle	10	0.27465	0.0415577	KIAA0100, DLST, SDHB, NNT, ACO1, IDH3B, IDH1, IDH3A, PDHB, MDH1	2906	23	13528	2.024	1	0.446204	55.4451
GOTERM_BP_FAT	GO:0001570~vasculogenesis	15	0.411975	0.041966	PTPRJ, CAV1, TGFBR2, WARS2, SHH, JUNB, SMO, AGGF1, FOXF1, HEY2, QKI, GLMN, NKX2-5, RASA1, SMARCA4	2906	41	13528	1.70312	1	0.448574	55.8052
GOTERM_BP_FAT	GO:0051130~positive regulation of cellular component organization	50	1.37325	0.0422979	SNCA, EDN1, RHOQ, TGFB1, TGFB2, DSTN, ACTR3, MEN1, GATA2, MAPT, RALA, TGFA, ARHGEF1, ACTN4, PRKCI, NUSAP1, TNKS2, UBE2N, PRKCQ, NDEL1, NCK1, EIF5A2, BBS4, CAV1, HOXA13, TNFRSF12A, ARF6, PPT1, CBLL1, CALR, SRF, SORBS1, ARPC2, NUMB, NPM1, PCSK9, NKX2-5, TINF2, NEFL, TERF2, HIP1, APC, NF2, PSRC1, CBL, MAP1B, CENPE, SMAD1, PLK4, FAF1	2906	181	13528	1.28597	1	0.450315	56.0959
GOTERM_BP_FAT	GO:0042921~glucocorticoid receptor signaling pathway	5	0.137325	0.0424685	YWHAH, NCOA6, ARID1A, NR3C1, CALR	2906	7	13528	3.32514	1	0.450766	56.2446
GOTERM_BP_FAT	GO:0006353~transcription termination	5	0.137325	0.0424685	MTERF, MAZ, TTF1, XRN2, TTF2	2906	7	13528	3.32514	1	0.450766	56.2446
GOTERM_BP_FAT	GO:0010149~senescence	5	0.137325	0.0424685	CDKN2A, CALR, SRF, TERF2, SOD2	2906	7	13528	3.32514	1	0.450766	56.2446
GOTERM_BP_FAT	GO:0046426~negative regulation of JAK-STAT cascade	5	0.137325	0.0424685	PPP2R1A, CAV1, NF2, PPP2CA, SOCS1	2906	7	13528	3.32514	1	0.450766	56.2446
GOTERM_BP_FAT	GO:0008634~negative regulation of survival gene product expression	5	0.137325	0.0424685	BAX, BNIP3L, BNIP3, BCL2L1, MYC	2906	7	13528	3.32514	1	0.450766	56.2446
GOTERM_BP_FAT	GO:0045910~negative regulation of DNA recombination	5	0.137325	0.0424685	MSH6, MSH2, NDFIP1, MLH1, BCL6	2906	7	13528	3.32514	1	0.450766	56.2446
GOTERM_BP_FAT	GO:0043353~enucleate erythrocyte differentiation	5	0.137325	0.0424685	MAEA, ID2, SP1, SP3, MB	2906	7	13528	3.32514	1	0.450766	56.2446
GOTERM_BP_FAT	GO:0009743~response to carbohydrate stimulus	20	0.5493	0.0428028	TXNIP, COL4A3, SLC6A1, PTGS2, PFKFB2, TGFBR2, MAP1B, RPS6KB1, PTPRN, TGFB1, ACVR1C, ACTR3, CASP6, PCSK1, PRKCQ, SARM1, COL6A2, NEUROD1, EIF2B2, EIF2B3	2906	60	13528	1.55173	1	0.452505	56.5347
GOTERM_BP_FAT	GO:0032411~positive regulation of transporter activity	6	0.16479	0.0434837	ACTN4, PLCG2, STIM2, STIM1, NKX2-5, CALM1	2906	10	13528	2.79312	1	0.456939	57.1198
GOTERM_BP_FAT	GO:0042273~ribosomal large subunit biogenesis	6	0.16479	0.0434837	RPL35A, RPL7, NPM1, RPL26, RPL11, PES1	2906	10	13528	2.79312	1	0.456939	57.1198
GOTERM_BP_FAT	GO:0022904~respiratory electron transport chain	21	0.576765	0.0437755	NDUFA4, NDUFA5, NDUFB5, NDUFB6, ALDH5A1, NDUFA9, NDUFB8, COX10, NDUFB9, SNCA, NDUFC2, SOD2, NDUFB2, SLC25A12, NDUFS7, SDHB, NDUFS5, UQCRH, NDUFV2, UQCRB, COX15	2906	64	13528	1.52749	1	0.458305	57.3683
GOTERM_BP_FAT	GO:0042326~negative regulation of phosphorylation	16	0.43944	0.0442537	PPP2R1A, CAV1, NF2, SMAD6, SOCS1, TGFB1, MEN1, CDKN1C, CDKN1A, CDKN2A, CDKN2B, CDKN2C, PPP2CA, BAX, ATXN7, IGFBP3	2906	45	13528	1.65518	1	0.461099	57.7726
GOTERM_BP_FAT	GO:0050768~negative regulation of neurogenesis	16	0.43944	0.0442537	BMP4, ARHGEF1, TP53, RTN4R, NKX6-1, TGFB1, EPHB2, DLX2, BDNF, RNF6, YWHAH, ULK1, SEMA3F, SEMA3A, OMG, BMPR1A	2906	45	13528	1.65518	1	0.461099	57.7726
GOTERM_BP_FAT	GO:0009749~response to glucose stimulus	16	0.43944	0.0442537	TXNIP, COL4A3, PFKFB2, TGFBR2, RPS6KB1, PTPRN, TGFB1, ACVR1C, PCSK1, PRKCQ, CASP6, SARM1, COL6A2, NEUROD1, EIF2B2, EIF2B3	2906	45	13528	1.65518	1	0.461099	57.7726
GOTERM_BP_FAT	GO:0032869~cellular response to insulin stimulus	22	0.60423	0.0445662	STAR, PTPN2, BAIAP2, PRKCI, FBP1, RHOQ, PDE3B, STAT1, LPIN1, SLC2A8, IGF1R, EIF4EBP1, GRB10, GOT1, SORBS1, CCND2, GSK3A, PCSK9, SHC1, HDAC9, VLDLR, GHR	2906	68	13528	1.50609	1	0.462597	58.0347
GOTERM_BP_FAT	GO:0006486~protein amino acid glycosylation	37	1.0162	0.044701	GALNT2, GYPC, LDLR, GALNT7, ALG1, ALG3, MAN1B1, ALG5, ALG8, ST6GALNAC5, POMT2, ST6GALNAC4, ST3GAL2, STT3A, B3GNT5, ST3GAL5, POMT1, MPDU1, B3GALNT2, RPN1, B4GALNT2, B3GNT1, RPN2, GCNT1, GALNT13, SDF2, LIPA, FUT11, DPAGT1, COG3, MGAT2, CD37, LARGE, ST8SIA4, ST8SIA5, LRP2, DOLPP1	2906	128	13528	1.34564	1	0.462728	58.1474
GOTERM_BP_FAT	GO:0043413~biopolymer glycosylation	37	1.0162	0.044701	GALNT2, GYPC, LDLR, GALNT7, ALG1, ALG3, MAN1B1, ALG5, ALG8, ST6GALNAC5, POMT2, ST6GALNAC4, ST3GAL2, STT3A, B3GNT5, ST3GAL5, POMT1, MPDU1, B3GALNT2, RPN1, B4GALNT2, B3GNT1, RPN2, GCNT1, GALNT13, SDF2, LIPA, FUT11, DPAGT1, COG3, MGAT2, CD37, LARGE, ST8SIA4, ST8SIA5, LRP2, DOLPP1	2906	128	13528	1.34564	1	0.462728	58.1474
GOTERM_BP_FAT	GO:0070085~glycosylation	37	1.0162	0.044701	GALNT2, GYPC, LDLR, GALNT7, ALG1, ALG3, MAN1B1, ALG5, ALG8, ST6GALNAC5, POMT2, ST6GALNAC4, ST3GAL2, STT3A, B3GNT5, ST3GAL5, POMT1, MPDU1, B3GALNT2, RPN1, B4GALNT2, B3GNT1, RPN2, GCNT1, GALNT13, SDF2, LIPA, FUT11, DPAGT1, COG3, MGAT2, CD37, LARGE, ST8SIA4, ST8SIA5, LRP2, DOLPP1	2906	128	13528	1.34564	1	0.462728	58.1474
GOTERM_BP_FAT	GO:0042113~B cell activation	24	0.65916	0.045687	EXO1, XRCC4, KLF6, MSH6, NBN, MSH2, TP53, MLH1, NFAM1, LIG4, TPD52, ADA, FOXP1, BAX, SP3, BCL2, BCL11A, PLCG2, ADAM17, BCL6, HSPD1, HDAC9, TSHR, ERCC1	2906	76	13528	1.47006	1	0.469307	58.9625
GOTERM_BP_FAT	GO:0060541~respiratory system development	32	0.878879	0.0461773	RBP4, CLCN2, FGF9, SOX2, BMPR2, GLI3, ADA, SHH, GLI1, ALDH1A2, CTGF, GATA6, ALDH1A3, FOXF1, LOX, BMP4, LIPA, EPAS1, TBX5, TGFBR2, FOXP1, HES1, PPP1CA, TULP3, EP300, SP1, LAMA5, SP3, MAPK8IP3, ADAMTS2, NFIB, BMPR1A	2906	108	13528	1.37932	1	0.472083	59.3622
GOTERM_BP_FAT	GO:0051640~organelle localization	28	0.76902	0.0465459	ARFGAP1, BBS4, BBS5, COPZ1, MLH1, VPS33B, VPS33A, HOOK3, COPB2, CENPA, NPM1, MKKS, TMED10, PEX13, SNAP23, ASPM, NUDC, NUSAP1, CENPE, ARL6, SLIT1, NDEL1, RHOT2, LRMP, YKT6, LRPPRC, COPE, MYH10	2906	92	13528	1.4168	1	0.473928	59.6603
GOTERM_BP_FAT	GO:0016072~rRNA metabolic process	29	0.796484	0.046546	LSM6, MKI67IP, BOP1, UTP11L, WDR36, CDKN2A, RPL7, RPL11, FTSJ3, DEDD2, RPS24, RPL35A, TBL3, EXOSC9, EXOSC7, EXOSC4, RPL26, EXOSC1, RPS6, FBL, C1ORF66, RPS19, RPS16, RPS14, WDR3, POP4, PES1, UTP14C, C1D	2906	96	13528	1.40626	1	0.473027	59.6604
GOTERM_BP_FAT	GO:0032570~response to progesterone stimulus	9	0.247185	0.0471023	TXNIP, FOS, CAV1, ERBB2, SOCS1, FOSL1, JUNB, TGFB1, TGFB2	2906	20	13528	2.09484	1	0.476242	60.1063
GOTERM_BP_FAT	GO:0033261~regulation of S phase	9	0.247185	0.0471023	CDC7, ILKAP, CYP1A1, SMAD6, BCL6, GAS1, DCUN1D3, RCC1, SMARCA4	2906	20	13528	2.09484	1	0.476242	60.1063
GOTERM_BP_FAT	GO:0051385~response to mineralocorticoid stimulus	9	0.247185	0.0471023	FOS, CDKN1A, CCND1, KRAS, BCL2, PTGS1, NEFL, FOSL1, JUNB	2906	20	13528	2.09484	1	0.476242	60.1063
GOTERM_BP_FAT	GO:0009262~deoxyribonucleotide metabolic process	11	0.302115	0.0472579	TYMS, RRM2, RRM1, TDG, AK5, RRM2B, DGUOK, C6ORF108, ADA, TBPL1, DUT	2906	27	13528	1.89656	1	0.476486	60.2302
GOTERM_BP_FAT	GO:0006944~membrane fusion	18	0.49437	0.0477337	GNAI3, RABIF, EEA1, VPS33B, HYAL4, MFN1, CORO1A, RABEP1, BNIP1, VAMP8, BAX, CATSPER1, LRMP, GOSR2, IZUMO1, SNAP23, STX11, GCA	2906	53	13528	1.58101	1	0.479071	60.6068
GOTERM_BP_FAT	GO:0006518~peptide metabolic process	18	0.49437	0.0477337	MRPS26, MRPS35, ALDH5A1, THOP1, IDE, SOD2, DNPEP, TAPBP, GLRX2, GSS, HAGH, PCSK1, GPX1, TPP1, GSTK1, GPX3, IDH1, PCSK5	2906	53	13528	1.58101	1	0.479071	60.6068
GOTERM_BP_FAT	GO:0001889~liver development	18	0.49437	0.0477337	CYP1A1, JARID2, ERBB2, ARF6, ASL, ADA, SOD2, HES1, ALDH1A2, HHEX, CCND1, EP300, SP1, CCND2, GATA6, RB1CC1, SP3, PCSK9	2906	53	13528	1.58101	1	0.479071	60.6068
GOTERM_BP_FAT	GO:0034622~cellular macromolecular complex assembly	82	2.25213	0.0477763	HIST4H4, COX11, WASF3, TUBB2A, COX10, PREX1, AP2S1, RBM5, SNRPD1, MLH1, TGFB1, NDUFS7, NDUFS5, SFRS5, MC1R, ANG, HIST2H2AC, HIST1H2BI, PRMT5, H2AFZ, H2AFX, PDGFC, HIST3H2BB, COX15, ARL2, HIST1H1D, SF1, IPO8, SFRS1, CDK5, ADRM1, C14ORF104, PFDN6, HIST2H2BE, IPO7, IPO4, NUP205, RPS14, NCK1, SNRPB, SMARCA5, SNRPE, UNC13B, SNRPG, HIST1H2AB, HIST1H4L, CAV1, HMGB2, HIST1H2AG, FKBP4, NUFIP1, CALR, PXN, …	2906	318	13528	1.2004	1	0.478484	60.6404
GOTERM_BP_FAT	GO:0048704~embryonic skeletal system morphogenesis	19	0.521835	0.0490227	GSC, TGFBR2, HSPG2, COL2A1, GAS1, SIX4, PRRX2, GLI3, HOXD9, MEN1, DLX2, HOXB4, EYA1, TULP3, HOXB7, HOXB5, HOXD4, GNAS, ALX4	2906	57	13528	1.55173	1	0.486587	61.6101
GOTERM_BP_FAT	GO:0045787~positive regulation of cell cycle	19	0.521835	0.0490227	CYP1A1, TBX3, HOXA13, SMAD6, EDN1, SPHK1, PIM1, NUSAP1, ASNS, CENPE, CALR, TGFB2, CCND1, APP, ID2, CCND2, TGFA, ADAM17, FOSL1	2906	57	13528	1.55173	1	0.486587	61.6101
GOTERM_BP_FAT	GO:0051656~establishment of organelle localization	22	0.60423	0.0515329	ARFGAP1, BBS4, BBS5, COPZ1, MLH1, NUSAP1, CENPE, ARL6, SLIT1, COPB2, CENPA, NPM1, RHOT2, MKKS, LRMP, TMED10, SNAP23, YKT6, LRPPRC, COPE, NUDC, MYH10	2906	69	13528	1.48427	1	0.503359	63.4949
GOTERM_BP_FAT	GO:0003007~heart morphogenesis	23	0.631695	0.052012	RBP4, BBS4, BBS5, LBX1, TBX3, COL2A1, ISL1, SRF, SHH, TGFB2, SMO, ALDH1A2, MSX1, LY6E, SMARCD3, HAND2, COL4A3BP, GATA4, GAA, MKKS, ADAMTS1, NKX2-5, SMARCA4	2906	73	13528	1.46671	1	0.505754	63.8445
GOTERM_BP_FAT	GO:0010769~regulation of cell morphogenesis involved in differentiation	24	0.65916	0.0523497	ARHGEF1, EFNA1, TNFRSF12A, MAP1B, BARHL2, RTN4R, CDH2, SMAD1, TTL, TGFB1, TGFB2, EPHB2, ACTR3, RNF6, YWHAH, NDEL1, ULK1, MAPT, SEMA3F, NUMB, SEMA3A, OMG, NEFL, CACNA1A	2906	77	13528	1.45097	1	0.50716	64.089
GOTERM_BP_FAT	GO:0032956~regulation of actin cytoskeleton organization	27	0.741555	0.052683	LIMA1, ACTR3B, CAPZA2, EDN1, RHOQ, RDX, ARF6, ARPC5, LATS1, VILL, DSTN, ACTR3, PFN2, ARPC2, RASA1, NF2, SPTBN4, MYO1F, TMSB10, PRKCQ, ARPC1B, CORO1A, NEB, NCK1, ARPC5L, ADD2, SPTAN1	2906	89	13528	1.41225	1	0.508525	64.3288
GOTERM_BP_FAT	GO:0009119~ribonucleoside metabolic process	16	0.43944	0.0530643	FHIT, COASY, OCLN, MAT2A, HMGCR, DGUOK, TPMT, NME7, ADA, PANK4, UMPS, PANK3, PANK1, NME1, DHODH, MAT2B	2906	46	13528	1.6192	1	0.510206	64.6013
GOTERM_BP_FAT	GO:0043241~protein complex disassembly	8	0.21972	0.053185	KIF2C, MTERF, MAZ, MTRF1, TTF1, ETF1, XRN2, TTF2	2906	17	13528	2.19068	1	0.510115	64.6871
GOTERM_BP_FAT	GO:0043624~cellular protein complex disassembly	8	0.21972	0.053185	KIF2C, MTERF, MAZ, MTRF1, TTF1, ETF1, XRN2, TTF2	2906	17	13528	2.19068	1	0.510115	64.6871
GOTERM_BP_FAT	GO:0002053~positive regulation of mesenchymal cell proliferation	8	0.21972	0.053185	ARHGAP5, FGF9, TGFBR2, PRRX2, GAS1, SHH, FOXP1, BMPR1A	2906	17	13528	2.19068	1	0.510115	64.6871
GOTERM_BP_FAT	GO:0045666~positive regulation of neuron differentiation	10	0.27465	0.0542072	ACTR3, BDNF, SOX2, MAP1B, NEUROD1, TGIF2, NEUROG3, NKX2-5, SHH, NKX6-1	2906	24	13528	1.93967	1	0.516067	65.4063
GOTERM_BP_FAT	GO:0032412~regulation of ion transmembrane transporter activity	10	0.27465	0.0542072	JPH3, GNAI2, ACTN4, CATSPER1, PLCG2, STIM2, STIM1, JPH1, NKX2-5, CALM1	2906	24	13528	1.93967	1	0.516067	65.4063
GOTERM_BP_FAT	GO:0008629~induction of apoptosis by intracellular signals	18	0.49437	0.0562051	MSH6, TP53, MLH1, BRCA1, C14ORF153, ATM, TXNDC12, GPX1, XPA, CDKN1A, ERCC6, RNF7, HIPK1, HTRA2, BAX, ABL1, MYC, CUL1	2906	54	13528	1.55173	1	0.528298	66.7719
GOTERM_BP_FAT	GO:0006919~activation of caspase activity	18	0.49437	0.0562051	COL4A3, TP53, BCL2L13, STAT1, RPS3, SLC11A2, MOAP1, CDKN2A, CASP9, GSPT1, BAX, MTCH1, PYCARD, APAF1, HSPD1, MYC, F2R, HIP1	2906	54	13528	1.55173	1	0.528298	66.7719
GOTERM_BP_FAT	GO:0030833~regulation of actin filament polymerization	18	0.49437	0.0562051	ACTR3B, CAPZA2, SPTBN4, RDX, ARF6, TMSB10, ARPC5, LATS1, VILL, ACTR3, ARPC1B, CORO1A, ARPC2, ARPC5L, NCK1, RASA1, ADD2, SPTAN1	2906	54	13528	1.55173	1	0.528298	66.7719
GOTERM_BP_FAT	GO:0006892~post-Golgi vesicle-mediated transport	19	0.521835	0.0573078	SCAMP1, CLTA, AP1M1, SCAMP2, STX7, AP1B1, AP1G1, RAB3IP, FTH1, AP1S1, VAMP8, BLOC1S3, TXNDC5, AP3B2, DNAJC6, SORT1, VPS13A, SNAP23, DNM2	2906	58	13528	1.52498	1	0.53449	67.5036
GOTERM_BP_FAT	GO:0030518~steroid hormone receptor signaling pathway	19	0.521835	0.0573078	KLF9, ESR1, ARID1A, CDK7, NR3C1, ESR2, CALR, DAXX, PPARGC1B, BRCA1, MED4, YWHAH, NCOA3, NCOA4, NCOA6, THRAP3, RARA, PIAS1, CARM1	2906	58	13528	1.52498	1	0.53449	67.5036
GOTERM_BP_FAT	GO:0048232~male gamete generation	79	2.16973	0.0574193	ACOX1, PRKAG1, NR6A1, MLH1, TBP, PTTG1, GLI1, SPAG16, YBX2, HOOK1, MKKS, QKI, H2AFX, FANCG, FNDC3A, OCA2, TBPL1, KHDRBS3, LIMK2, CCNI, PMCH, UBR2, SPAG9, PROK2, TCFL5, CATSPER2, CCND2, CATSPER3, CATSPER1, TESK1, SPATA16, TESK2, SIAH1, ADAMTS2, EIF5A2, ADC, WFDC2, XRN2, RAD23B, DHH, RBP4, BBS4, HMGB2, ADCYAP1R1, ZNF35, BCL2L1, ZBTB16, NR2C2, DAZAP1, SPATA9, CCT6B, HSPA2, OVOL1, PAFAH1B3, BCL6, HSF…	2906	308	13528	1.19403	1	0.534289	67.5767
GOTERM_BP_FAT	GO:0007283~spermatogenesis	79	2.16973	0.0574193	ACOX1, PRKAG1, NR6A1, MLH1, TBP, PTTG1, GLI1, SPAG16, YBX2, HOOK1, MKKS, QKI, H2AFX, FANCG, FNDC3A, OCA2, TBPL1, KHDRBS3, LIMK2, CCNI, PMCH, UBR2, SPAG9, PROK2, TCFL5, CATSPER2, CCND2, CATSPER3, CATSPER1, TESK1, SPATA16, TESK2, SIAH1, ADAMTS2, EIF5A2, ADC, WFDC2, XRN2, RAD23B, DHH, RBP4, BBS4, HMGB2, ADCYAP1R1, ZNF35, BCL2L1, ZBTB16, NR2C2, DAZAP1, SPATA9, CCT6B, HSPA2, OVOL1, PAFAH1B3, BCL6, HSF…	2906	308	13528	1.19403	1	0.534289	67.5767
GOTERM_BP_FAT	GO:0030323~respiratory tube development	30	0.823949	0.0585515	RBP4, CLCN2, FGF9, BMPR2, GLI3, ADA, SHH, GLI1, ALDH1A2, CTGF, GATA6, FOXF1, LOX, PCSK5, BMP4, LIPA, EPAS1, TBX5, TGFBR2, FOXP1, HES1, PPP1CA, EP300, SP1, LAMA5, SP3, MAPK8IP3, ADAMTS2, NFIB, BMPR1A	2906	102	13528	1.36918	1	0.540551	68.3105
GOTERM_BP_FAT	GO:0006479~protein amino acid methylation	14	0.38451	0.058675	C17ORF79, ETF1, MEN1, MLL5, PRMT1, PRMT2, GSPT1, PRMT5, WHSC1L1, PRDM5, BHMT, RAB6A, CARM1, HEMK1	2906	39	13528	1.6711	1	0.540414	68.3896
GOTERM_BP_FAT	GO:0008213~protein amino acid alkylation	14	0.38451	0.058675	C17ORF79, ETF1, MEN1, MLL5, PRMT1, PRMT2, GSPT1, PRMT5, WHSC1L1, PRDM5, BHMT, RAB6A, CARM1, HEMK1	2906	39	13528	1.6711	1	0.540414	68.3896
GOTERM_BP_FAT	GO:0021510~spinal cord development	14	0.38451	0.058675	PHOX2A, LBX1, PAX3, ISL1, GLI3, NKX6-1, SHH, SMO, TULP3, PAX7, RAB23, CHRD, CACNA1A, C1ORF187	2906	39	13528	1.6711	1	0.540414	68.3896
GOTERM_BP_FAT	GO:0051272~positive regulation of cell motion	29	0.796484	0.0589199	PDGFB, IL6ST, MMP9, CSF1, EDN1, RPS6KB1, CBLL1, TGFB1, TGFB2, IGF1R, ARHGAP5, BCL2, BCL6, APC, ADAM10, ACTN4, CREB3, SPHK1, MYO1F, MAPK1, CDH13, SPAG9, CORO1A, RPS19, ETS1, PTP4A1, ADAM17, HDAC9, F2R	2906	98	13528	1.37756	1	0.541039	68.5459
GOTERM_BP_FAT	GO:0051216~cartilage development	23	0.631695	0.0595292	BMP4, BMP3, ESRRA, EVC, BMP1, FGF9, EDN1, SOX5, HSPG2, COL2A1, PRRX2, DLX2, MEF2D, MSX1, CTGF, PAX7, HOXC4, IL17F, PKD1, GNAS, COL11A2, BMPR1A, GHR	2906	74	13528	1.44689	1	0.543925	68.9315
GOTERM_BP_FAT	GO:0048662~negative regulation of smooth muscle cell proliferation	7	0.192255	0.0596338	ANG, IL12A, SF1, IL15, IGFBP3, KLF4, IGFBP5	2906	14	13528	2.3276	1	0.543666	68.9972
GOTERM_BP_FAT	GO:0021904~dorsal/ventral neural tube patterning	7	0.192255	0.0596338	BMP4, SMO, GSC, TULP3, PAX7, GAS1, SHH	2906	14	13528	2.3276	1	0.543666	68.9972
GOTERM_BP_FAT	GO:0042559~pteridine and derivative biosynthetic process	7	0.192255	0.0596338	GPHN, MOCS3, MOCS2, QDPR, SPR, FPGS, GCH1	2906	14	13528	2.3276	1	0.543666	68.9972
GOTERM_BP_FAT	GO:0051099~positive regulation of binding	24	0.65916	0.059679	SP100, MTDH, SKI, NFAM1, PRDX3, SHH, TGFB1, UBE2N, CARD11, PRKCQ, EP300, KRAS, MYD88, NCOA3, NME1, NPM1, PYCARD, EDF1, RIPK2, TSSK4, IKBKB, ADD2, CALM1, SMARCA4	2906	78	13528	1.43237	1	0.54304	69.0256
GOTERM_BP_FAT	GO:0002521~leukocyte differentiation	37	1.0162	0.0605509	CALCR, XRCC4, MMP9, CSF1, IL15, TPD52, CD74, TGFB1, ADA, FLT3LG, BCL2, CASP8, BCL11A, PPP3CB, BCL6, TRAF6, SYK, APC, KLF6, IL7, FLT3, MSH2, TGFBR2, TP53, LIG4, NFAM1, FOXP1, CARD11, RPL22, SP3, BAX, PLCG2, IRF1, ADAM17, HDAC9, TSHR, SCAND1	2906	131	13528	1.31483	1	0.547498	69.5681
GOTERM_BP_FAT	GO:0009141~nucleoside triphosphate metabolic process	37	1.0162	0.0605509	ATP1B2, ATP5B, PRKAG2, RHOQ, ATP5G2, RRM2B, ATP6V1B2, ATP5G1, ATP12A, ADA, TGFB1, ATP6V0B, GCH1, ATP2B1, ATP2B4, ATP8B2, ATP5L, RAB11A, ATP5O, ATP6V0D1, ATP5H, TBPL1, ATP5J, AK1, ATP1A3, AK3, ATP11B, AK5, DGUOK, ATP13A2, NME7, ATP6V1F, NME1, ATP9B, ATP2C1, ATP2A3, DUT	2906	131	13528	1.31483	1	0.547498	69.5681
GOTERM_BP_FAT	GO:0001838~embryonic epithelial tube formation	15	0.411975	0.0610958	BBS4, RET, PTK7, FZD3, CELSR1, PAX3, SHH, VASP, PFN1, OVOL2, CASP8, APAF1, TRAF6, IPMK, TWIST1	2906	43	13528	1.62391	1	0.549915	69.9025
GOTERM_BP_FAT	GO:0010627~regulation of protein kinase cascade	65	1.78522	0.0613052	SLC20A1, IL6ST, FGF9, LEPR, EDN1, TLR6, ITSN1, DAXX, PRDX1, TGFB1, TGFB2, MEN1, MAP3K6, GPX1, MAP3K5, MYD88, CASP8, RHOC, TMEM101, PAK1, GPR89A, SYK, GHR, PPP2R1A, C9ORF89, SOCS1, PKN1, FADD, ECT2, GRM1, UBE2N, CARD11, TRIM38, MAP4K5, ATP2C1, SEMA4C, IL12A, RIPK2, TNFAIP3, NEK6, PPP5C, CAV1, ERBB2, MAP4K1, TFG, KCNRG, TIMP2, ERCC6, REL, PPP2CA, NENF, TRAF6, APC, EPO, CARD8, NF2, TAOK3, NDFIP1, BI…	2906	249	13528	1.21521	1	0.550282	70.0301
GOTERM_BP_FAT	GO:0045814~negative regulation of gene expression, epigenetic	9	0.247185	0.062212	DNMT3A, EPC1, SIRT4, SIRT5, SIRT7, MBD3, SIRT2, SMARCA4, SIRT3	2906	21	13528	1.99508	1	0.554837	70.5768
GOTERM_BP_FAT	GO:0001568~blood vessel development	64	1.75776	0.0624567	NRP2, CDX2, FGF9, LEPR, ATP5B, EDN1, PRRX2, TNFSF12, SHH, TGFB2, GPX1, PROP1, CD44, CTGF, ANG, FOXF1, HEY2, CASP8, SEMA3C, TGFA, QKI, ANGPT1, LOX, IHH, CYR61, PTPRJ, RECK, JUNB, SMO, PROK2, ATPIF1, SMARCA4, CAV1, TNFRSF12A, WARS2, CDH2, SRF, TCF7L2, AGGF1, HAND2, ITGAV, GBX2, PKD1, ZC3H12A, NKX2-5, C1GALT1, RASA1, SCG2, BMP4, KLF5, EPAS1, TBX3, SPHK2, VHL, TGFBR2, UBP1, ANXA2, CDH13, MEOX2, ID1, …	2906	245	13528	1.21605	1	0.555398	70.7226
GOTERM_BP_FAT	GO:0007517~muscle organ development	56	1.53804	0.062595	MEF2C, POU6F1, MEF2B, MEF2A, AEBP1, PAX3, TGFB2, APP, GATA6, PAX7, RARB, ALX4, JPH1, EGR3, GSC, LBX1, SIX4, CACNG2, CDK5, HOXD9, IGSF8, MSX1, EP300, GAA, SGCB, RBP4, CAV1, ACHE, ERBB2, TNC, ITGA11, FHL3, CACNB2, GPHN, LY6E, COL6A3, PPP3CB, NKX2-5, FOXL2, EVC, TBX5, HSPG2, LMNA, CSRP2, FOXP1, FXR1, MEF2D, NEB, MEOX2, LAMA5, NDUFV2, ITGA7, MYH10, SNTA1, F2R, IGFBP5	2906	211	13528	1.2355	1	0.555324	70.8048
GOTERM_BP_FAT	GO:0016054~organic acid catabolic process	32	0.878879	0.0641273	ACOX1, BCKDK, KYNU, BCAT2, ECH1, EHHADH, ECHS1, PAH, KMO, ASL, HADHA, AUH, HADHB, MCCC2, GAD2, GOT1, ACOT8, MCCC1, HARS2, ALDH4A1, PEX13, ACAD8, HSD17B4, DDAH2, ENOSF1, ALDH6A1, ACADS, BCKDHB, GLS, C14ORF126, HIBCH, ACAA1	2906	111	13528	1.34204	1	0.563453	71.7005
GOTERM_BP_FAT	GO:0046395~carboxylic acid catabolic process	32	0.878879	0.0641273	ACOX1, BCKDK, KYNU, BCAT2, ECH1, EHHADH, ECHS1, PAH, KMO, ASL, HADHA, AUH, HADHB, MCCC2, GAD2, GOT1, ACOT8, MCCC1, HARS2, ALDH4A1, PEX13, ACAD8, HSD17B4, DDAH2, ENOSF1, ALDH6A1, ACADS, BCKDHB, GLS, C14ORF126, HIBCH, ACAA1	2906	111	13528	1.34204	1	0.563453	71.7005
GOTERM_BP_FAT	GO:0043507~positive regulation of JUN kinase activity	12	0.32958	0.0642647	MAP3K6, MAP4K5, MAP3K5, ERCC6, EDN1, MAPK8IP3, PKN1, MAP4K1, PAK1, TLR6, DAXX, SYK	2906	32	13528	1.7457	1	0.563357	71.7795
GOTERM_BP_FAT	GO:0009165~nucleotide biosynthetic process	50	1.37325	0.0644084	KYNU, ATP1B2, ATP5B, ADCY6, PRKAG2, TGFB1, ATP2B1, ATP2B4, ATP8B2, ATP5L, ATP5O, ATP6V0D1, ATP5H, TBPL1, ATP5J, NMNAT2, GMPS, NME7, ATP6V1F, UMPS, NME1, ATP9B, ATP2C1, RRM2, RRM1, DHFRL1, KMO, ATP5G2, ATP6V1B2, ATP5G1, RRM2B, ATP12A, ADA, ATP6V0B, TYMS, ENTPD8, DHODH, DCTD, ADSSL1, MSH2, ATP11B, ATP1A3, AK3, AK5, PRPSAP1, ATP13A2, GART, AMPD1, ATP2A3, QPRT	2906	186	13528	1.2514	1	0.563298	71.8619
GOTERM_BP_FAT	GO:0043244~regulation of protein complex disassembly	17	0.466905	0.0645144	LIMA1, CAPZA2, SPTBN4, MAP1B, RDX, ETF1, VILL, DSTN, MAPT, MTRF1, HRSP12, MAP4, CLASP2, EIF5A2, ADD2, APC, SPTAN1	2906	51	13528	1.55173	1	0.563021	71.9226
GOTERM_BP_FAT	GO:0006354~RNA elongation	17	0.466905	0.0645144	POLR2G, POLR2F, TAF6, ELL, CDK9, TBP, CDK7, POLR2C, GTF2B, POLR2B, TAF11, ADRM1, TAF13, GTF2F1, TCEA1, SUPT4H1, SUPT5H	2906	51	13528	1.55173	1	0.563021	71.9226
GOTERM_BP_FAT	GO:0030098~lymphocyte differentiation	30	0.823949	0.0653622	XRCC4, IL15, TPD52, CD74, ADA, TGFB1, FLT3LG, BCL2, BCL11A, PPP3CB, BCL6, SYK, APC, KLF6, IL7, MSH2, FLT3, TP53, LIG4, NFAM1, FOXP1, CARD11, RPL22, BAX, SP3, PLCG2, IRF1, ADAM17, HDAC9, TSHR	2906	103	13528	1.35588	1	0.56702	72.4033
GOTERM_BP_FAT	GO:0030324~lung development	29	0.796484	0.0659158	RBP4, CLCN2, FGF9, BMPR2, GLI3, ADA, SHH, GLI1, ALDH1A2, CTGF, GATA6, FOXF1, LOX, BMP4, LIPA, EPAS1, TBX5, TGFBR2, FOXP1, HES1, PPP1CA, EP300, SP1, LAMA5, SP3, MAPK8IP3, ADAMTS2, NFIB, BMPR1A	2906	99	13528	1.36364	1	0.569295	72.713
GOTERM_BP_FAT	GO:0055024~regulation of cardiac muscle tissue development	6	0.16479	0.0659494	RBP4, FGF9, TBX5, GATA4, HEY2, TGFBR2	2906	11	13528	2.5392	1	0.568598	72.7317
GOTERM_BP_FAT	GO:0055021~regulation of cardiac muscle growth	6	0.16479	0.0659494	RBP4, FGF9, TBX5, GATA4, HEY2, TGFBR2	2906	11	13528	2.5392	1	0.568598	72.7317
GOTERM_BP_FAT	GO:0030520~estrogen receptor signaling pathway	6	0.16479	0.0659494	NCOA6, ESR1, RARA, ARID1A, ESR2, PPARGC1B	2906	11	13528	2.5392	1	0.568598	72.7317
GOTERM_BP_FAT	GO:0048588~developmental cell growth	6	0.16479	0.0659494	APP, LAMB2, ULK1, POU4F3, POU4F2, GDF9	2906	11	13528	2.5392	1	0.568598	72.7317
GOTERM_BP_FAT	GO:0042274~ribosomal small subunit biogenesis	6	0.16479	0.0659494	RPS19, RPS16, RPS14, NPM1, RPS6, RPS24	2906	11	13528	2.5392	1	0.568598	72.7317
GOTERM_BP_FAT	GO:0060043~regulation of cardiac muscle cell proliferation	6	0.16479	0.0659494	RBP4, FGF9, TBX5, GATA4, HEY2, TGFBR2	2906	11	13528	2.5392	1	0.568598	72.7317
GOTERM_BP_FAT	GO:0043586~tongue development	6	0.16479	0.0659494	BMP4, ERBB2, SOX2, GAA, NKX2-5, SHH	2906	11	13528	2.5392	1	0.568598	72.7317
GOTERM_BP_FAT	GO:0031623~receptor internalization	6	0.16479	0.0659494	ARRB2, ULK1, GRIA1, SNCA, GRK4, GHR	2906	11	13528	2.5392	1	0.568598	72.7317
GOTERM_BP_FAT	GO:0045619~regulation of lymphocyte differentiation	20	0.5493	0.067119	FLT3, IL7, ERBB2, TGFBR2, NDFIP1, NFAM1, IL15, ADA, SHH, CD74, CLPTM1, CARD11, CDKN2A, IL4R, AP3D1, RARA, BCL6, INPP5D, AP3B1, SYK	2906	63	13528	1.47784	1	0.574319	73.3747
GOTERM_BP_FAT	GO:0051098~regulation of binding	42	1.15353	0.067716	MTDH, NFKBIA, EGLN1, PRDX3, TGFB1, SHH, YBX2, RPS3, MEN1, MYD88, KRAS, CDKN2A, SMARCD3, BCL2, NPM1, PYCARD, PEX14, SP100, TAF6, PIM1, SKI, NFAM1, TAF6L, UBE2N, CARD11, SMO, PRKCQ, EP300, NCOA3, ID2, ID1, NME1, BAX, EDF1, RIPK2, PBX1, ID3, TSSK4, IKBKB, ADD2, CALM1, SMARCA4	2906	153	13528	1.2779	1	0.576769	73.6974
GOTERM_BP_FAT	GO:0009260~ribonucleotide biosynthetic process	35	0.961274	0.0684587	ATP1B2, ATP5B, PRKAG2, ATP5G2, ATP6V1B2, ATP5G1, ATP12A, TGFB1, ADA, ATP6V0B, ATP2B1, ATP2B4, DHODH, ATP8B2, ATP5L, ATP5O, ATP6V0D1, ATP5H, ATP5J, ADSSL1, ATP1A3, AK3, ATP11B, AK5, ATP13A2, GMPS, NME7, ATP6V1F, AMPD1, GART, UMPS, NME1, ATP9B, ATP2C1, ATP2A3	2906	124	13528	1.31397	1	0.58	74.0936
GOTERM_BP_FAT	GO:0042733~embryonic digit morphogenesis	10	0.27465	0.0691124	TULP3, TBX3, GNA12, HOXD12, RAB23, LRP6, GAS1, GLI3, SHH, LRP5	2906	25	13528	1.86208	1	0.582707	74.4377
GOTERM_BP_FAT	GO:0034765~regulation of ion transmembrane transport	10	0.27465	0.0691124	JPH3, GNAI2, ACTN4, CATSPER1, PLCG2, STIM2, STIM1, JPH1, NKX2-5, CALM1	2906	25	13528	1.86208	1	0.582707	74.4377
GOTERM_BP_FAT	GO:0021515~cell differentiation in spinal cord	10	0.27465	0.0691124	PHOX2A, LBX1, PAX7, PAX3, ISL1, GLI3, SHH, CACNA1A, NKX6-1, C1ORF187	2906	25	13528	1.86208	1	0.582707	74.4377
GOTERM_BP_FAT	GO:0010948~negative regulation of cell cycle process	10	0.27465	0.0691124	MAD2L1, BCL6, CENPE, GAS1, DCUN1D3, MAD2L2, ATM, BRCA1, SMARCA4, APC	2906	25	13528	1.86208	1	0.582707	74.4377
GOTERM_BP_FAT	GO:0045669~positive regulation of osteoblast differentiation	10	0.27465	0.0691124	MEN1, BMP4, IL6ST, DLX5, JUND, SMAD5, BMPR2, GNAS, SMAD1, BMPR1A	2906	25	13528	1.86208	1	0.582707	74.4377
GOTERM_BP_FAT	GO:0016925~protein sumoylation	4	0.10986	0.0698308	SUMO3, SUMO2, PIAS4, PIAS3, SENP7	2906	5	13528	3.72416	1	0.585737	74.8108
GOTERM_BP_FAT	GO:0006290~pyrimidine dimer repair	4	0.10986	0.0698308	ERCC6, POLH, POLB, ERCC1	2906	5	13528	3.72416	1	0.585737	74.8108
GOTERM_BP_FAT	GO:0000089~mitotic metaphase	4	0.10986	0.0698308	MAD1L1, FBXO5, CENPE, PES1	2906	5	13528	3.72416	1	0.585737	74.8108
GOTERM_BP_FAT	GO:0009968~negative regulation of signal transduction	58	1.59297	0.0698537	IL6ST, FGF9, PDE3B, PAWR, MEN1, ZGPAT, HEY2, IHH, DEPDC6, PPP2R1A, GSC, STMN3, SOCS2, C9ORF89, STRN3, SOCS1, CTNNBIP1, HHEX, GRB10, CCND1, TNFAIP3, GRB14, TWSG1, CAV1, SOX2, NFKBIA, CXXC4, PRDM16, GREM1, CALR, ADA, PIN1, PEG10, OVOL2, PPP2CA, PPP2CB, BCL6, INPP5D, SKIL, APC, CARD8, NF2, SMAD6, TAOK3, RGS19, SKI, GAS1, TAX1BP3, LRP1, TULP3, GSK3A, RGS4, ATXN7, LRP6, GRK4, CHRD, IGFBP3, IGFBP5	2906	221	13528	1.22173	1	0.584981	74.8226
GOTERM_BP_FAT	GO:0001841~neural tube formation	14	0.38451	0.0704652	BBS4, PTK7, FZD3, CELSR1, PAX3, SHH, VASP, PFN1, OVOL2, CASP8, APAF1, TRAF6, IPMK, TWIST1	2906	40	13528	1.62932	1	0.587403	75.136
GOTERM_BP_FAT	GO:0010224~response to UV-B	5	0.137325	0.0707517	ERCC6, XPC, MSH2, BCL2, IL12A	2906	8	13528	2.9095	1	0.588064	75.2816
GOTERM_BP_FAT	GO:0032205~negative regulation of telomere maintenance	5	0.137325	0.0707517	TERF2IP, ERCC4, TINF2, ERCC1, TERF2	2906	8	13528	2.9095	1	0.588064	75.2816
GOTERM_BP_FAT	GO:0031958~corticosteroid receptor signaling pathway	5	0.137325	0.0707517	YWHAH, NCOA6, ARID1A, NR3C1, CALR	2906	8	13528	2.9095	1	0.588064	75.2816
GOTERM_BP_FAT	GO:0045843~negative regulation of striated muscle development	5	0.137325	0.0707517	BMP4, HDAC9, LUC7L, SIRT2, TWIST1	2906	8	13528	2.9095	1	0.588064	75.2816
GOTERM_BP_FAT	GO:0048705~skeletal system morphogenesis	32	0.878879	0.0710824	COL2A1, PRRX2, GLI3, TGFB1, MEN1, HOXC8, CTGF, ANKRD11, PKD1, COL11A2, ALX4, MYC, IDUA, GHR, BMP1, GSC, TGFBR2, HSPG2, GAS1, SIX4, HOXD9, DLX2, HOXB4, MEF2D, EYA1, TULP3, HOXB7, NAB2, HOXB5, HOXD4, GNAS, PLEKHA1	2906	112	13528	1.33006	1	0.588957	75.4486
GOTERM_BP_FAT	GO:0010464~regulation of mesenchymal cell proliferation	8	0.21972	0.0714088	ARHGAP5, FGF9, TGFBR2, PRRX2, GAS1, SHH, FOXP1, BMPR1A	2906	18	13528	2.06898	1	0.589821	75.6124
GOTERM_BP_FAT	GO:0019438~aromatic compound biosynthetic process	8	0.21972	0.0714088	GPHN, MOCS3, MOCS2, QDPR, PAH, SPR, FPGS, GCH1	2906	18	13528	2.06898	1	0.589821	75.6124
GOTERM_BP_FAT	GO:0021695~cerebellar cortex development	8	0.21972	0.0714088	SMO, ULK1, LHX5, RORA, CDK5, CACNA1A, MYH10, GLI1	2906	18	13528	2.06898	1	0.589821	75.6124
GOTERM_BP_FAT	GO:0045987~positive regulation of smooth muscle contraction	8	0.21972	0.0714088	PROK2, PTGS2, PTGS1, EDN1, SPHK1, SRF, ADA, F2R	2906	18	13528	2.06898	1	0.589821	75.6124
GOTERM_BP_FAT	GO:0006342~chromatin silencing	8	0.21972	0.0714088	DNMT3A, SIRT4, SIRT5, SIRT7, MBD3, SIRT2, SMARCA4, SIRT3	2906	18	13528	2.06898	1	0.589821	75.6124
GOTERM_BP_FAT	GO:0035148~tube lumen formation	15	0.411975	0.0725606	BBS4, RET, PTK7, FZD3, CELSR1, PAX3, SHH, VASP, PFN1, OVOL2, CASP8, APAF1, TRAF6, IPMK, TWIST1	2906	44	13528	1.587	1	0.595026	76.1821
GOTERM_BP_FAT	GO:0001656~metanephros development	15	0.411975	0.0725606	BMP4, RET, GREM1, GLI3, SHH, BDNF, EYA1, SPRY1, OSR1, CD44, LAMA5, BCL2, SALL1, PBX1, RARB	2906	44	13528	1.587	1	0.595026	76.1821
GOTERM_BP_FAT	GO:0030183~B cell differentiation	16	0.43944	0.0741481	KLF6, MSH2, TP53, NFAM1, TPD52, FOXP1, ADA, BAX, SP3, BCL2, BCL11A, PLCG2, ADAM17, BCL6, HDAC9, TSHR	2906	48	13528	1.55173	1	0.602395	76.9468
GOTERM_BP_FAT	GO:0006368~RNA elongation from RNA polymerase II promoter	16	0.43944	0.0741481	POLR2G, POLR2F, TAF6, ELL, CDK9, TBP, CDK7, POLR2C, GTF2B, POLR2B, TAF11, ADRM1, TAF13, GTF2F1, SUPT4H1, SUPT5H	2906	48	13528	1.55173	1	0.602395	76.9468
GOTERM_BP_FAT	GO:0010721~negative regulation of cell development	16	0.43944	0.0741481	BMP4, ARHGEF1, TP53, RTN4R, NKX6-1, TGFB1, EPHB2, DLX2, BDNF, RNF6, YWHAH, ULK1, SEMA3F, SEMA3A, OMG, BMPR1A	2906	48	13528	1.55173	1	0.602395	76.9468
GOTERM_BP_FAT	GO:0032970~regulation of actin filament-based process	27	0.741555	0.0748585	LIMA1, ACTR3B, CAPZA2, EDN1, RHOQ, RDX, ARF6, ARPC5, LATS1, VILL, DSTN, ACTR3, PFN2, ARPC2, RASA1, NF2, SPTBN4, MYO1F, TMSB10, PRKCQ, ARPC1B, CORO1A, NEB, NCK1, ARPC5L, ADD2, SPTAN1	2906	92	13528	1.3662	1	0.605161	77.2813
GOTERM_BP_FAT	GO:0006364~rRNA processing	27	0.741555	0.0748585	LSM6, BOP1, UTP11L, WDR36, CDKN2A, RPL7, RPL11, FTSJ3, RPS24, RPL35A, TBL3, EXOSC9, EXOSC7, EXOSC4, RPL26, EXOSC1, RPS6, FBL, C1ORF66, RPS19, RPS16, RPS14, WDR3, POP4, PES1, UTP14C, C1D	2906	92	13528	1.3662	1	0.605161	77.2813
GOTERM_BP_FAT	GO:0009755~hormone-mediated signaling	17	0.466905	0.075318	ADCY6, LHCGR, ADIPOR1, GNG12, LATS1, PRKAR2B, PRKAR2A, GNB2, GNB1, PRKAR1B, PRKAR1A, GNAS, GNB4, GNG3, PRKACB, GNG4, GHR	2906	52	13528	1.52189	1	0.606628	77.4953
GOTERM_BP_FAT	GO:0070663~regulation of leukocyte proliferation	25	0.686625	0.0759919	IL6ST, ERBB2, CSF1, IL15, PAWR, ADA, TGFB1, SHH, CDKN2A, BCL6, INPP5D, EBI3, SYK, IL7, NDFIP1, TNFRSF13C, PRKCQ, CARD11, CDKN1A, CORO1A, NCK1, CD274, IL12A, GLMN, RIPK2	2906	84	13528	1.38548	1	0.609164	77.8057
GOTERM_BP_FAT	GO:0032944~regulation of mononuclear cell proliferation	25	0.686625	0.0759919	IL6ST, ERBB2, CSF1, IL15, PAWR, ADA, TGFB1, SHH, CDKN2A, BCL6, INPP5D, EBI3, SYK, IL7, NDFIP1, TNFRSF13C, PRKCQ, CARD11, CDKN1A, CORO1A, NCK1, CD274, IL12A, GLMN, RIPK2	2906	84	13528	1.38548	1	0.609164	77.8057
GOTERM_BP_FAT	GO:0051091~positive regulation of transcription factor activity	19	0.521835	0.0766789	SP100, MTDH, NFAM1, PRDX3, SHH, TGFB1, UBE2N, PRKCQ, CARD11, EP300, KRAS, MYD88, NCOA3, NPM1, PYCARD, RIPK2, TSSK4, IKBKB, SMARCA4	2906	60	13528	1.47415	1	0.611738	78.1179
GOTERM_BP_FAT	GO:0009063~cellular amino acid catabolic process	21	0.576765	0.0770695	ALDH6A1, BCKDK, KYNU, BCAT2, BCKDHB, PAH, KMO, ASL, AUH, MCCC2, GAD2, GOT1, MCCC1, GLS, HARS2, ALDH4A1, C14ORF126, ACAD8, HIBCH, DDAH2, ENOSF1	2906	68	13528	1.43763	1	0.612818	78.2935
GOTERM_BP_FAT	GO:0009152~purine ribonucleotide biosynthetic process	33	0.906344	0.0774856	ATP1B2, ATP5B, PRKAG2, ATP5G2, ATP6V1B2, ATP5G1, ATP12A, TGFB1, ADA, ATP6V0B, ATP2B1, ATP2B4, ATP8B2, ATP5L, ATP5O, ATP6V0D1, ATP5H, ATP5J, ADSSL1, ATP1A3, AK3, ATP11B, AK5, ATP13A2, GMPS, NME7, AMPD1, GART, ATP6V1F, NME1, ATP9B, ATP2C1, ATP2A3	2906	117	13528	1.313	1	0.614017	78.4791
GOTERM_BP_FAT	GO:0043062~extracellular structure organization	44	1.20846	0.0774933	ACHE, MMP9, LUM, TNC, ERBB2, HSD17B12, CACNB2, CDH1, COL2A1, NFKB2, CDH2, APLP2, TGFB2, GPHN, APP, P4HA1, FOXF1, POMT1, FOXF2, COL6A2, COL12A1, POU4F1, LOX, COL11A2, DPT, CYR61, RECK, DNM3, MYO6, LMX1B, LGALS3, VHL, MAP1B, NFASC, HSPG2, CACNG2, ANXA2, FBLN5, ADAMTS3, ADAMTS2, CACNA1A, SMARCA4, F2R, SNTA1	2906	163	13528	1.25662	1	0.613195	78.4826
GOTERM_BP_FAT	GO:0044087~regulation of cellular component biogenesis	39	1.07113	0.0775434	BBS4, CAV1, ACTR3B, CAPZA2, EDN1, RHOQ, ARF6, RDX, ARPC5, SRF, LATS1, VILL, ACTR3, EIF4EBP1, ARPC2, MAPT, RALA, NKX2-5, MDN1, RASA1, RPS27A, APC, ATF7IP, NF2, SMAD6, SPTBN4, MAP1B, PSRC1, STXBP1, TMSB10, ARPC1B, PRKCQ, CORO1A, ARPC5L, NCK1, FAF1, UBB, ADD2, SPTAN1	2906	142	13528	1.27854	1	0.612585	78.5048
GOTERM_BP_FAT	GO:0006612~protein targeting to membrane	12	0.32958	0.0783985	SRP54, ATG4C, PEX26, TIMM9, PEX16, TIMM10, CACNB1, PRKCI, TIMM8B, SSR2, SRP9, SSR1	2906	33	13528	1.6928	1	0.615928	78.8812
GOTERM_BP_FAT	GO:0032409~regulation of transporter activity	12	0.32958	0.0783985	JPH3, GNAI2, ACTN4, CATSPER1, SNCA, PLCG2, NDFIP1, STIM2, STIM1, JPH1, NKX2-5, CALM1	2906	33	13528	1.6928	1	0.615928	78.8812
GOTERM_BP_FAT	GO:0051650~establishment of vesicle localization	12	0.32958	0.0783985	ARFGAP1, BBS4, COPB2, BBS5, COPZ1, TMED10, LRMP, MKKS, SNAP23, ARL6, YKT6, COPE	2906	33	13528	1.6928	1	0.615928	78.8812
GOTERM_BP_FAT	GO:0051347~positive regulation of transferase activity	62	1.70283	0.0795306	PDGFB, EFNA1, PRKAG1, PRKAG2, EDN1, ADCY6, SDC4, TLR6, DAXX, TGFB1, TGFB2, MAP3K6, PRKAR2B, MAP3K5, PRKAR2A, ANG, TGFA, SHC1, PDGFC, CHRNA7, GNG3, PRKACB, PAK1, MAP2K6, SYK, GHR, MADD, PIM1, PKN1, CDK5, GRM1, SPAG9, PROK2, CCND1, MAP4K5, CCND2, ADAM17, GNAI2, PFKFB2, ERBB2, CSF1, MAP4K1, CD74, KRAS, ERCC6, DGKG, NPM1, CERK, TRAF6, DGKQ, SPHK2, SPHK1, TGFBR2, DGKH, CENPE, DGKI, LRP1, PRKAR1B, PRKA…	2906	240	13528	1.20259	1	0.620567	79.3699
GOTERM_BP_FAT	GO:0051270~regulation of cell motion	51	1.40071	0.0796422	PDGFB, IL6ST, MMP9, EDN1, RPS6KB1, SHH, TGFB1, TGFB2, NISCH, ARHGAP5, SEMA3F, RRAS, MKKS, SEMA3A, ADAM10, SP100, ACTN4, PTPRU, CDK5, VASH1, SPAG9, MAPK1, RPS19, CLIC4, ADAM17, BBS4, ENPP2, CSF1, CBLL1, GREM1, ADA, IGF1R, BCL2, TEK, BCL6, APC, CREB3, NF2, TBX5, SPHK1, MYO1F, CDH13, CORO1A, ETS1, LAMA5, PTP4A1, HDAC9, IGFBP3, CHRD, F2R, IGFBP5	2906	193	13528	1.23013	1	0.620253	79.4174
GOTERM_BP_FAT	GO:0000718~nucleotide-excision repair, DNA damage removal	9	0.247185	0.0800155	RAD23B, PNKP, XPA, RPA2, XPC, DDB1, CDK7, ERCC4, ERCC1	2906	22	13528	1.9044	1	0.621195	79.5758
GOTERM_BP_FAT	GO:0001658~branching involved in ureteric bud morphogenesis	9	0.247185	0.0800155	BMP4, EYA1, CD44, LAMA5, BCL2, PBX1, GREM1, GLI3, SHH	2906	22	13528	1.9044	1	0.621195	79.5758
GOTERM_BP_FAT	GO:0006282~regulation of DNA repair	9	0.247185	0.0800155	UBE2N, EYA3, ERCC8, EYA1, POLH, PRKCG, H2AFX, BRCA1, RPS3	2906	22	13528	1.9044	1	0.621195	79.5758
GOTERM_BP_FAT	GO:0060675~ureteric bud morphogenesis	9	0.247185	0.0800155	BMP4, EYA1, CD44, LAMA5, BCL2, PBX1, GREM1, GLI3, SHH	2906	22	13528	1.9044	1	0.621195	79.5758
GOTERM_BP_FAT	GO:0001938~positive regulation of endothelial cell proliferation	7	0.192255	0.0819037	POLD4, CDH13, PDGFB, AGGF1, ANG, TNFSF12, SCG2	2906	15	13528	2.17242	1	0.629298	80.3596
GOTERM_BP_FAT	GO:0031290~retinal ganglion cell axon guidance	7	0.192255	0.0819037	EPHA7, POU4F3, POU4F2, EPHB3, ISL1, SLIT1, EPHB2	2906	15	13528	2.17242	1	0.629298	80.3596
GOTERM_BP_FAT	GO:0045739~positive regulation of DNA repair	7	0.192255	0.0819037	UBE2N, EYA3, ERCC8, EYA1, PRKCG, H2AFX, BRCA1	2906	15	13528	2.17242	1	0.629298	80.3596
GOTERM_BP_FAT	GO:0007605~sensory perception of sound	28	0.76902	0.0825715	NDUFB9, SOX2, TIMM10, COL2A1, PAX3, GPX1, KCNQ4, MCOLN3, TIMM9, POU4F3, POU4F2, MKKS, COL11A2, MYC, KCNQ1, COCH, COL4A3, DFNA5, MYO6, ZNF354A, MYO3A, SPTBN4, TIMM8B, EML2, SLC26A4, SLC17A8, EYA1, FBXO11	2906	97	13528	1.34377	1	0.631571	80.63
GOTERM_BP_FAT	GO:0051251~positive regulation of lymphocyte activation	28	0.76902	0.0825715	IL6ST, TNFSF12, IL15, ADA, TGFB1, CD74, STAT6, BLOC1S3, IL4R, AP3D1, RARA, BCL6, INPP5D, TRAF6, EBI3, SYK, AP3B1, IL7, TGFBR2, TNFRSF13C, PRKCQ, CARD11, CORO1A, CDKN1A, NCK1, IL12A, RIPK2, HSPD1	2906	97	13528	1.34377	1	0.631571	80.63
GOTERM_BP_FAT	GO:0016569~covalent chromatin modification	35	0.961274	0.0826633	ENY2, SUPT3H, ING4, TRRAP, C17ORF79, MEN1, EPC1, TAF5L, MLL5, BRPF1, PRMT5, RTF1, SUPT7L, USP16, MYST1, BRD8, DNMT3A, RING1, HDAC10, MBD3, TAF6L, SIRT2, UBE2N, RPS6KA5, EYA3, EYA1, EP300, ATXN7, WHSC1L1, PRDM5, PAF1, CARM1, HDAC9, RNF40, SMARCA4	2906	126	13528	1.29311	1	0.631153	80.6668
GOTERM_BP_FAT	GO:0000226~microtubule cytoskeleton organization	40	1.0986	0.0830904	CEP72, BBS4, CAV1, PRC1, NEK2, CETN3, MLH1, RCC1, TTL, HOOK3, HOOK1, KIF2C, TUBGCP5, CEP250, CENPA, KATNA1, MAPT, NPM1, TUBE1, FBXO5, DYNC1H1, PPP4C, NEFL, RET, KIF11, STMN3, MAP1B, PSRC1, TBCE, NUSAP1, CP110, PCM1, GABARAP, BRCA1, DCTN2, NDEL1, SPAG5, CKS2, GADD45A, SPAST	2906	147	13528	1.26672	1	0.63229	80.8376
GOTERM_BP_FAT	GO:0050679~positive regulation of epithelial cell proliferation	14	0.38451	0.0836969	FGF9, ERBB2, GAS1, MMP12, TGFB1, FOXP1, CCND2, NME1, DLX5, GRN, TGFA, FOXE3, IHH, BMPR1A	2906	41	13528	1.58958	1	0.634245	81.0776
GOTERM_BP_FAT	GO:0042254~ribosome biogenesis	34	0.933809	0.0839544	NHP2L1, SURF6, LSM6, BOP1, EBNA1BP2, UTP11L, WDR36, CDKN2A, RPL7, NPM1, RPL11, GNL2, FTSJ3, RPS24, RPL35A, TBL3, EXOSC9, GTPBP5, EXOSC7, BYSL, EXOSC4, RPL26, EXOSC1, RPS6, FBL, C1ORF66, RPS19, RPS16, RPS14, WDR3, POP4, PES1, UTP14C, C1D	2906	122	13528	1.29735	1	0.634587	81.1786
GOTERM_BP_FAT	GO:0009144~purine nucleoside triphosphate metabolic process	34	0.933809	0.0839544	ATP1B2, ATP5B, PRKAG2, RHOQ, ATP5G2, ATP6V1B2, ATP5G1, ATP12A, ADA, TGFB1, ATP6V0B, GCH1, ATP2B1, ATP2B4, ATP8B2, ATP5L, RAB11A, ATP5O, ATP6V0D1, ATP5H, ATP5J, AK1, ATP1A3, AK3, ATP11B, AK5, DGUOK, ATP13A2, NME7, ATP6V1F, NME1, ATP9B, ATP2C1, ATP2A3	2906	122	13528	1.29735	1	0.634587	81.1786
GOTERM_BP_FAT	GO:0051495~positive regulation of cytoskeleton organization	15	0.411975	0.0853443	CAV1, NF2, PSRC1, MAP1B, EDN1, CENPE, ARF6, DSTN, ACTR3, PRKCQ, PLK4, ARPC2, MAPT, NCK1, APC	2906	45	13528	1.55173	1	0.640065	81.7151
GOTERM_BP_FAT	GO:0046519~sphingoid metabolic process	15	0.411975	0.0853443	PPP2R1A, SPHK2, GM2A, ALDH5A1, SPHK1, LASS5, LASS6, GBA2, ST3GAL5, LASS2, PPP2CA, COL4A3BP, LASS1, CERK, CLN6	2906	45	13528	1.55173	1	0.640065	81.7151
GOTERM_BP_FAT	GO:0045165~cell fate commitment	38	1.04367	0.0859969	POU6F2, SOX2, MITF, SOX5, PAX3, GLI3, TCF7L2, SHH, TGFB2, MEN1, GATA2, SPRY1, WNT3, BCL2, PAX7, GFI1, TLX3, FGF3, BMP4, LBX1, IL7, BARHL2, SMAD5, TP53, NEUROG1, SMAD1, GAS1, ISL1, NKX6-1, HES1, SMO, DLX2, EYA1, SALL1, NEUROD1, NEUROD4, KLF4, SMARCA4	2906	139	13528	1.27264	1	0.642161	81.962
GOTERM_BP_FAT	GO:0000737~DNA catabolic process, endonucleolytic	10	0.27465	0.0863307	TXNDC12, FOXL2, CDKN2A, BAX, BNIP3, PPT1, APAF1, ERCC4, MYC, ERCC1	2906	26	13528	1.79046	1	0.642819	82.0871
GOTERM_BP_FAT	GO:0031100~organ regeneration	10	0.27465	0.0863307	CDKN1A, CCND1, ALDOC, SOCS1, ANGPT1, PTPRU, LRP2, CCNA2, GAS6, TGFB1	2906	26	13528	1.79046	1	0.642819	82.0871
GOTERM_BP_FAT	GO:0022898~regulation of transmembrane transporter activity	10	0.27465	0.0863307	JPH3, GNAI2, ACTN4, CATSPER1, PLCG2, STIM2, STIM1, JPH1, NKX2-5, CALM1	2906	26	13528	1.79046	1	0.642819	82.0871
GOTERM_BP_FAT	GO:0048146~positive regulation of fibroblast proliferation	10	0.27465	0.0863307	FNTB, XRCC4, CDKN1A, FOSL2, PDGFB, SPHK1, CDK6, PDGFC, LIG4, CCNA2	2906	26	13528	1.79046	1	0.642819	82.0871
GOTERM_BP_FAT	GO:0043414~biopolymer methylation	21	0.576765	0.0874926	ATF7IP, DNMT3A, MLL, CTCF, C17ORF79, ETF1, MEN1, FOS, MLL5, PRMT1, PRMT2, GSPT1, PRMT5, WHSC1L1, BHMT, PRDM5, RAB6A, CARM1, NSUN2, FTSJ3, HEMK1	2906	69	13528	1.4168	1	0.647134	82.516
GOTERM_BP_FAT	GO:0010720~positive regulation of cell development	21	0.576765	0.0874926	XRCC4, ARHGEF1, STAR, TNFRSF12A, SOX2, MAP1B, XRCC6, LIG4, SMAD1, TGFB1, NKX6-1, SHH, TGFB2, EPHB2, ACTR3, SMO, NDEL1, MAPT, BCL2, NUMB, NEFL	2906	69	13528	1.4168	1	0.647134	82.516
GOTERM_BP_FAT	GO:0006839~mitochondrial transport	21	0.576765	0.0874926	GRPEL2, GRPEL1, YWHAZ, TP53, TIMM10, TOMM40, BNIP3, BCL2L1, TIMM23, TIMM8B, SLC25A12, TRNT1, STARD3, IMMP2L, KIAA1279, TOMM70A, UCP2, BAX, BCL2, TIMM9, ATP5O	2906	69	13528	1.4168	1	0.647134	82.516
GOTERM_BP_FAT	GO:0050770~regulation of axonogenesis	18	0.49437	0.087668	ARHGEF1, TNFRSF12A, EFNA1, BARHL2, MAP1B, RTN4R, CDH2, TTL, EPHB2, RNF6, NDEL1, ULK1, MAPT, SEMA3F, SEMA3A, OMG, NEFL, CACNA1A	2906	57	13528	1.47006	1	0.647076	82.5799
GOTERM_BP_FAT	GO:0007566~embryo implantation	11	0.302115	0.090961	PTGS2, KLF9, IGFBP7, FKBP4, GRN, SFRP4, TGFBR2, TTPA, PCSK5, RPL29, EPO	2906	30	13528	1.70691	1	0.660444	83.7393
GOTERM_BP_FAT	GO:0051186~cofactor metabolic process	51	1.40071	0.0920553	KYNU, ALAD, ALDH1L1, HMGCR, COX10, PDHB, GSS, GPX1, HMOX2, ACOT8, MCCC1, GPX3, COX15, NMNAT2, FECH, CYP1A1, ACO1, ALDH5A1, HMBS, COQ7, PANK4, KIAA0100, HAGH, COQ3, PGLS, NNT, PANK3, PANK1, NFE2L1, MDH1, COASY, KMO, PPT1, GCH1, GLRX2, GPHN, UGT1A9, GSTK1, IDH1, RPIA, DLST, MOCS3, MOCS2, IDH3B, IDH3A, SOD2, OXSM, DBT, SDHB, QPRT, FPGS	2906	195	13528	1.21751	1	0.664222	84.1081
GOTERM_BP_FAT	GO:0001944~vasculature development	64	1.75776	0.092671	NRP2, CDX2, FGF9, LEPR, ATP5B, EDN1, PRRX2, TNFSF12, SHH, TGFB2, GPX1, PROP1, CD44, CTGF, ANG, FOXF1, HEY2, CASP8, SEMA3C, TGFA, QKI, ANGPT1, LOX, IHH, CYR61, PTPRJ, RECK, JUNB, SMO, PROK2, ATPIF1, SMARCA4, CAV1, TNFRSF12A, WARS2, CDH2, SRF, TCF7L2, AGGF1, HAND2, ITGAV, GBX2, PKD1, ZC3H12A, NKX2-5, C1GALT1, RASA1, SCG2, BMP4, KLF5, EPAS1, TBX3, SPHK2, VHL, TGFBR2, UBP1, ANXA2, CDH13, MEOX2, ID1, …	2906	251	13528	1.18698	1	0.665966	84.3121
GOTERM_BP_FAT	GO:0048483~autonomic nervous system development	8	0.21972	0.0928809	PHOX2A, HES1, HOXA1, SMO, RET, ERBB2, GBX2, GFRA3	2906	19	13528	1.96008	1	0.666018	84.3811
GOTERM_BP_FAT	GO:0006309~DNA fragmentation involved in apoptosis	8	0.21972	0.0928809	TXNDC12, FOXL2, CDKN2A, BAX, BNIP3, PPT1, APAF1, MYC	2906	19	13528	1.96008	1	0.666018	84.3811
GOTERM_BP_FAT	GO:0007276~gamete generation	97	2.6641	0.0934006	PTGS2, HMGCR, TBP, RPS6KB1, PTTG1, TGFB1, HOOK1, GDF9, H2AFX, FNDC3A, TBPL1, PMCH, UBR2, SPAG9, TCFL5, CATSPER2, CATSPER3, CATSPER1, TESK1, SPATA16, TESK2, ADAMTS1, ADAMTS2, WFDC2, XRN2, RBP4, BBS4, RAD23B, HMGB2, ADCYAP1R1, BCL2L1, NR2C2, DAZAP1, OVOL1, FBXO5, STRBP, ASF1B, BMP4, DNMT3A, MEA1, SMAD5, CASC5, SMAD1, ATM, GGN, TUBD1, UTP14C, ACOX1, SPIN1, PRKAG1, LEPR, NR6A1, MLH1, SPAG16, YBX2, GL…	2906	395	13528	1.14317	1	0.667348	84.5506
GOTERM_BP_FAT	GO:0016567~protein ubiquitination	33	0.906344	0.0935148	DZIP3, UBE3A, LMO7, ANAPC11, CBLL1, STUB1, OS9, ERCC8, FBXW7, WWP1, FBXO4, FBXO24, FBXO3, TRAF6, RPS27A, VHL, DDB1, CBL, RING1, TRIM23, RBBP6, BRCA1, UBE2N, GSPT1, WDSUB1, SIAH1, PAF1, SIAH2, UBB, CHFR, RNF40, RNF41, FBXO11	2906	119	13528	1.29094	1	0.667003	84.5876
GOTERM_BP_FAT	GO:0060420~regulation of heart growth	6	0.16479	0.0936786	RBP4, FGF9, TBX5, GATA4, HEY2, TGFBR2	2906	12	13528	2.3276	1	0.666864	84.6406
GOTERM_BP_FAT	GO:0031102~neuron projection regeneration	6	0.16479	0.0936786	SMO, LAMB2, BCL2, MAP1B, RTN4RL2, NEFL	2906	12	13528	2.3276	1	0.666864	84.6406
GOTERM_BP_FAT	GO:0051926~negative regulation of calcium ion transport	6	0.16479	0.0936786	GNAO1, PTGS2, GNAI2, BCL2, STIM2, TGFB1	2906	12	13528	2.3276	1	0.666864	84.6406
GOTERM_BP_FAT	GO:0006809~nitric oxide biosynthetic process	6	0.16479	0.0936786	ARG2, SPR, RORA, DDAH2, GCHFR, GCH1	2906	12	13528	2.3276	1	0.666864	84.6406
GOTERM_BP_FAT	GO:0048048~embryonic eye morphogenesis	6	0.16479	0.0936786	FOXL2, SP1, ALDH1A3, SP3, VAX2, RARB	2906	12	13528	2.3276	1	0.666864	84.6406
GOTERM_BP_FAT	GO:0014910~regulation of smooth muscle cell migration	6	0.16479	0.0936786	PDGFB, IL6ST, BCL2, RPS6KB1, IGFBP3, IGFBP5	2906	12	13528	2.3276	1	0.666864	84.6406
GOTERM_BP_FAT	GO:0032350~regulation of hormone metabolic process	6	0.16479	0.0936786	LHCGR, NR3C1, TRERF1, STUB1, TCF7L2, CACNA1A	2906	12	13528	2.3276	1	0.666864	84.6406
GOTERM_BP_FAT	GO:0010039~response to iron ion	6	0.16479	0.0936786	SLC11A2, CASP6, CCND1, CYP1A1, BCL2, SNCA	2906	12	13528	2.3276	1	0.666864	84.6406
GOTERM_BP_FAT	GO:0046676~negative regulation of insulin secretion	6	0.16479	0.0936786	INHBB, SIRT4, KCNJ11, KCNQ1, ACVR1C, PSMD9	2906	12	13528	2.3276	1	0.666864	84.6406
GOTERM_BP_FAT	GO:0002792~negative regulation of peptide secretion	6	0.16479	0.0936786	INHBB, SIRT4, KCNJ11, KCNQ1, ACVR1C, PSMD9	2906	12	13528	2.3276	1	0.666864	84.6406
GOTERM_BP_FAT	GO:0033673~negative regulation of kinase activity	26	0.71409	0.0939327	CAV1, HMGCR, PRKAG2, PRDX3, MBIP, LATS1, MEN1, ZGPAT, SPRY1, CDKN2A, HEXIM2, PPP2CA, MLLT1, CDK5RAP1, APC, GPS1, DEPDC6, PPP2R1A, NF2, PKIB, CDKN1C, CDKN1A, RGS4, DUSP8, GADD45A, DUSP6	2906	90	13528	1.34483	1	0.667095	84.7224
GOTERM_BP_FAT	GO:0043648~dicarboxylic acid metabolic process	12	0.32958	0.0943287	DLST, SDHB, KYNU, GAD2, GOT1, ALDH5A1, IDH3B, PAH, QPRT, IDH3A, GHR, MDH1	2906	34	13528	1.64301	1	0.667905	84.8491
GOTERM_BP_FAT	GO:0045767~regulation of anti-apoptosis	13	0.357045	0.0967334	CAV1, STAR, IL6ST, SMAD1, BCL2L1, CDKN1A, LRP1, DUSP1, BAX, ANGPT1, RARA, RASA1, PIK3R2	2906	38	13528	1.59257	1	0.67678	85.5972
GOTERM_BP_FAT	GO:0043122~regulation of I-kappaB kinase/NF-kappaB cascade	30	0.823949	0.0981234	SLC20A1, TFG, KCNRG, TLR6, MYD88, REL, CASP8, TMEM101, RHOC, TRAF6, GPR89A, CARD8, C9ORF89, NDFIP1, FADD, BIRC2, ECT2, TRADD, UBE2N, TRAF3IP2, TRIM38, CARD11, IKBKE, ATP2C1, RIPK2, TNFAIP3, IKBKB, NEK6, PPP5C, F2R	2906	107	13528	1.3052	1	0.681457	86.0135
GOTERM_BP_FAT	GO:0045637~regulation of myeloid cell differentiation	21	0.576765	0.0987933	HIST1H4L, HIST4H4, CSF1, MITF, NFKBIA, ZBTB16, PRDM16, ACVR1B, SMAP1, HIST1H4C, HIST1H4D, INPP5D, ACIN1, RUNX1, HIST1H4I, APC, ZFP36, ZBTB7A, ESRRA, NDFIP1, CDK6, ID2, ETS1, NME1, GNAS	2906	70	13528	1.39656	1	0.683269	86.2101
GOTERM_BP_FAT	GO:0060538~skeletal muscle organ development	20	0.5493	0.0994543	CAV1, FOXL2, ERBB2, TNC, CACNB2, CACNG2, SIX4, CDK5, FOXP1, HOXD9, GPHN, APP, IGSF8, EP300, MEOX2, PAX7, PPP3CB, SNTA1, F2R, IGFBP5	2906	66	13528	1.41067	1	0.68503	86.4015
GOTERM_BP_FAT	GO:0042471~ear morphogenesis	20	0.5493	0.0994543	MYO6, FGF9, OTX1, SOX2, EDN1, NEUROG1, FZD3, COL2A1, GAS1, SIX4, PRRX2, HOXA1, KCNQ4, EYA1, DLX5, GBX2, POU4F3, GFI1, FOXI1, MYC	2906	66	13528	1.41067	1	0.68503	86.4015
GOTERM_BP_FAT	GO:0007519~skeletal muscle tissue development	20	0.5493	0.0994543	CAV1, FOXL2, ERBB2, TNC, CACNB2, CACNG2, SIX4, CDK5, FOXP1, HOXD9, GPHN, APP, IGSF8, EP300, MEOX2, PAX7, PPP3CB, SNTA1, F2R, IGFBP5	2906	66	13528	1.41067	1	0.68503	86.4015
GOTERM_BP_FAT	GO:0050905~neuromuscular process	19	0.521835	0.0999541	NBN, GM2A, SOX2, UCHL1, AARS, GRIN2A, GRIN3A, APLP2, GCH1, APP, TPP1, GRID2, GAA, POU4F3, POU4F2, POU4F1, NEFL, CACNA1A, MYH10	2906	62	13528	1.42659	1	0.686158	86.5445
GOTERM_BP_FAT	GO:0042129~regulation of T cell proliferation	19	0.521835	0.0999541	IL6ST, ERBB2, NDFIP1, TNFRSF13C, IL15, PAWR, SHH, TGFB1, PRKCQ, CARD11, CORO1A, CDKN2A, NCK1, CD274, IL12A, GLMN, RIPK2, EBI3, SYK	2906	62	13528	1.42659	1	0.686158	86.5445
Enriched GO terms (Biological processes) in Meth2
Category	Term	Count	%	PValue	Genes	List Total	Pop Hits	Pop Total	Fold Enrichment	Bonferroni	Benjamini	FDR
GOTERM_BP_FAT	GO:0006952~defense response	129	6.86901	6.47424e-14	A2M, APOBEC1, ADORA3, MASP1, DEFB106A, MASP2, ANKRD1, TLR6, IL31RA, REG3A, GRIN2B, LTB4R, CD46, HIST1H2BI, PGLYRP2, IFNG, MS4A2, IFNK, REG3G, DDAH2, APOM, GNG7, F12, PLD1, C5AR1, PLUNC, NCF2, FOXN1, CCL4L2, HLA-C, IL22, C20ORF185, CCR9, C1QB, SERPINF2, CCR3, LYST, LILRB3, DEFA5, F2, CX3CR1, MNDA, PLA2G2E, PLA2G2D, KIR3DL2, TPST1, LALBA, TNFAIP8L2, ITGAL, IL1R1, CCL2, DEFB125, CCL8, DEFB129, UMOD,…	1458	615	13528	1.94621	2.56898e-10	2.56898e-10	1.20182e-10
GOTERM_BP_FAT	GO:0042592~homeostatic process	126	6.70927	3.24698e-07	SLC9A3, MPV17, GHRHR, IL31RA, CTNNB1, GRIN2B, APOE, LCAT, IFNG, GALR2, APOA5, SLC4A1, CHRNA1, INSR, APOM, C5AR1, SLC34A1, NTSR2, SLC34A2, CCR9, CCR8, PLCE1, TXNDC2, CCR3, F2, DLD, CCL1, XDH, SRI, C17ORF37, CCL2, DRD3, DRD5, SFXN1, BDKRB2, SOX6, CCL5, CCL7, ACSBG1, KCNMB2, HSPA1L, TAL1, APOC4, PDILT, ANGPTL3, SLC30A8, BMP4, LPL, SMG6, NTF3, GRIN1, WRN, ABCG1, ABCG5, CXCL13, HOXB6, PLCG2, AVPR1A, F…	1458	751	13528	1.55671	0.0012879	0.000644155	0.000602893
GOTERM_BP_FAT	GO:0048878~chemical homeostasis	92	4.89883	8.43104e-07	JPH4, CCKAR, FGF7, SLC9A3, CYP11B2, GHRHR, EDNRB, FXN, GRIN2B, SAA2, APOE, SAA1, LCAT, SLC1A6, APOA5, GALR2, TRPV4, LTF, SLC4A1, CHRNA1, XCR1, INSR, KCNQ1, APOM, MT4, C5AR1, ATP4A, SLC34A1, RPH3AL, CCDC47, CACNG2, PFKM, NTSR2, SLC34A2, CCR9, CCR8, G6PC, PLCE1, CCR3, F2, DLD, NAB1, GPR12, CLDN16, SRI, CCL1, CCL2, DRD3, DRD5, EGLN1, FKBP1A, CLDN11, BDKRB2, CCL5, CCL7, ACSBG1, KCNMB2, CCL23, C11ORF9…	1458	512	13528	1.66722	0.00334069	0.00111481	0.00156545
GOTERM_BP_FAT	GO:0019932~second-messenger-mediated signaling	51	2.71565	1.67807e-06	CCKAR, GHRHR, EDNRB, LTB4R, APOE, GALR2, XCR1, HTR1D, LTB, TUBB3, LTA, HTR1E, PIK3C2A, FSHR, NTSR2, GRM1, SSTR4, GRM5, PLCE1, UCN3, LAT2, CHRM5, CD36, SSTR3, CA8, CCR3, MC2R, LACRT, GNAS, PTAFR, CCL2, DRD3, DRD5, FPR1, P2RY6, HRH1, HRH2, PPP2CA, CNR1, AGT, HIST1H4F, GPRC6A, P2RY12, GCK, AVPR1A, MC4R, NMBR, CORT, PDZD3, SELE, HTR2A	1458	235	13528	2.01362	0.00663812	0.00166368	0.00311577
GOTERM_BP_FAT	GO:0007267~cell-cell signaling	101	5.37806	4.83802e-06	FGF18, MPZL1, UTS2, LTBP4, GDF5, FGF10, GHRHR, CTNNB1, CTTNBP2, GRIN2B, APOE, GALR2, GATA4, HTR1D, CHRNA1, HTR1E, IL26, CCL4L2, FGF21, PDYN, IL22, CTNNA2, SSTR3, CD33, SDCBP, LALBA, DRD3, DRD5, KCNA1, CCL8, CCL5, CCL7, KCNMB1, HCRTR1, TEK, SLC30A8, GABRD, BMP4, FCER1A, MLN, NTF3, GNRH1, GABRA5, GRIN1, SMAD2, CXCL13, P2RX3, TMOD2, CHRNB3, CORT, GHSR, ASIP, PMCHL2, FCRL2, GJA1, SLC1A6, TRPV4, SEMA3…	1458	600	13528	1.56187	0.019019	0.00383306	0.00898279
GOTERM_BP_FAT	GO:0009611~response to wounding	91	4.84558	6.70725e-06	JUB, A2M, FGF7, ADORA3, MASP1, NDST1, MASP2, FGF10, RPS6KB1, TLR6, REG3A, GP5, LPA, SAA2, SAA1, LTB4R, CD46, APOA5, APOH, SERPINA3, MS4A2, LBP, REG3G, XCR1, CFHR5, TFPI2, F11, F12, IL18RAP, CCL4L2, IL22, CD163, PROC, C8A, C1QB, CD36, EREG, SERPINF2, CCR3, F2, CX3CR1, SERPINB2, SPRR3, PLA2G2E, PLA2G2D, PTAFR, TPST1, ITGAL, CCL2, C9, ADAMTS13, DRD5, C5, CCL8, BDKRB2, CCL5, TIMP3, DTNBP1, CCL7, TNFR…	1458	530	13528	1.59309	0.0262699	0.00442703	0.0124532
GOTERM_BP_FAT	GO:0042330~taxis	37	1.97018	1.28389e-05	CCL1, CCL2, ENPP2, C5, FPR1, FGF10, CCL8, CCL5, CCL7, EDNRB, DOCK2, CCL23, SAA2, SAA1, IFNG, PLA2G1B, CCBP2, LECT2, XCR1, DEFB1, IL4, IL6, PLD1, C5AR1, MAP2K1, CMKLR1, CCL4L2, CCL15, CCR9, CCR8, CCL13, CXCL13, CCR3, LYST, CX3CR1, PTAFR, CMTM5	1458	160	13528	2.14564	0.0496815	0.00725329	0.0238365
GOTERM_BP_FAT	GO:0006935~chemotaxis	37	1.97018	1.28389e-05	CCL1, CCL2, ENPP2, C5, FPR1, FGF10, CCL8, CCL5, CCL7, EDNRB, DOCK2, CCL23, SAA2, SAA1, IFNG, PLA2G1B, CCBP2, LECT2, XCR1, DEFB1, IL4, IL6, PLD1, C5AR1, MAP2K1, CMKLR1, CCL4L2, CCL15, CCR9, CCR8, CCL13, CXCL13, CCR3, LYST, CX3CR1, PTAFR, CMTM5	1458	160	13528	2.14564	0.0496815	0.00725329	0.0238365
GOTERM_BP_FAT	GO:0007610~behavior	81	4.3131	1.86469e-05	TAS2R1, CCKAR, OBP2B, FGF10, RPS6KB1, NR2E1, EDNRB, FXN, GRIN2B, SAA2, SAA1, IFNG, GALR2, PLA2G1B, XCR1, GNG7, PLD1, C5AR1, CMKLR1, CCL4L2, GRM1, CCR9, CCR8, CCR3, LYST, GRM7, CX3CR1, RELN, PTAFR, CCL1, PRLHR, CCL2, DRD3, ENPP2, DRD5, C5, TH, FPR1, CCL8, CCL5, CCL7, ESPN, TAL2, HCRTR1, PLCL1, DOCK2, CCL23, PDE1B, CNR1, AGT, BCL2, PTN, CCBP2, LECT2, DEFB1, FZD9, DMBX1, IL4, GLRB, IL6, MAP2K1, GABR…	1458	469	13528	1.60246	0.0713377	0.0092086	0.0346176
GOTERM_BP_FAT	GO:0031960~response to corticosteroid stimulus	24	1.27796	2.18209e-05	A2M, CCL2, SLC9A3, ALDOB, RPS6KB1, CCL5, GHRHR, SRC, BCL2, LCAT, INSR, BMP4, IL6, GNRH1, MAP2K1, CNGA3, UGT1A1, ABCB4, C1QB, UGT1A10, CDKN1A, UCN3, CCND1, AVPR1A, FABP4	1458	85	13528	2.6198	0.0829638	0.00957699	0.0405091
GOTERM_BP_FAT	GO:0006936~muscle contraction	35	1.86368	2.90962e-05	UTS2, MYBPC1, CALD1, MYBPC3, GJA1, PGAM2, RPS6KB1, FKBP1A, BDKRB2, TTN, EDNRB, LTB4R, AGT, SLMAP, GALR2, SNTB1, KCNE2, MYOM1, SCN7A, CHRNA1, HCN4, KCNQ1, MYH1, CRYAB, MYH7, PDE4D, TRIM63, ARHGEF11, TRDN, TNNT3, P2RX3, KBTBD10, CASQ2, SGCA, CHRNG	1458	153	13528	2.12252	0.109065	0.011482	0.0540115
GOTERM_BP_FAT	GO:0006955~immune response	109	5.80405	3.45835e-05	APOBEC1, MASP1, MASP2, VTCN1, TNFSF15, TLR6, IL31RA, CTNNBL1, AZGP1, LTB4R, PGLYRP2, CD46, IFNG, PLA2G1B, MS4A2, GNL1, IKBKAP, GBP7, F12, GBP6, C5AR1, PLUNC, NCF2, CCL4L2, HLA-C, HLA-DQA2, C20ORF185, CCR9, LILRB1, IGSF6, CCR8, C1QB, LAT2, LYST, LILRB3, GBP3, CD300LB, TNFAIP8L2, CCL1, ITGAL, IL1R1, CCL2, CYSLTR2, ENPP2, IFITM2, ENPP3, CCL8, CCL5, CCL7, CHIT1, HLA-DRB5, DEFB1, IL1RL1, IL1F10, CD300…	1458	690	13528	1.46573	0.12826	0.012401	0.0641946
GOTERM_BP_FAT	GO:0006954~inflammatory response	60	3.19489	3.81032e-05	A2M, ADORA3, MASP1, NDST1, MASP2, TLR6, REG3A, SAA2, LTB4R, SAA1, CD46, SERPINA3, MS4A2, LBP, REG3G, CFHR5, XCR1, F12, IL18RAP, CCL4L2, IL22, CD163, C8A, C1QB, SERPINF2, CCR3, F2, PLA2G2E, PLA2G2D, PTAFR, TPST1, ITGAL, CCL2, C9, C5, CCL8, BDKRB2, CCL5, CCL7, TNFRSF1A, HRH1, CCL23, FCN2, ITGB6, IL17F, IL6, IL2RA, IL5, OLR1, NFRKB, CYP4F11, C4BPA, TP73, ORM1, APOL3, CCL13, CXCL13, CRH, CLEC7A, SELE	1458	325	13528	1.71295	0.140354	0.0125238	0.0707258
GOTERM_BP_FAT	GO:0008544~epidermis development	39	2.07668	5.69693e-05	FGF7, BTD, RBP2, CRABP2, FGF10, LCE1B, SPRR2E, SFN, SPINK5, ACVR1B, COL7A1, SPRR2D, SPRR2A, BCL2, TGM1, POU3F1, IVL, LTB, RUNX3, EDARADD, LCE4A, MAP2K1, NTF3, KLK5, FOXN1, KRT13, LCE2B, KRT10, COL5A2, SCEL, EVPL, EREG, KRTAP5-9, CASP14, LCE1F, FLG, SPRR3, LAMC2, LCE3E	1458	184	13528	1.96663	0.202376	0.0172433	0.105727
GOTERM_BP_FAT	GO:0007398~ectoderm development	41	2.18317	6.95032e-05	FGF7, BTD, ELF5, RBP2, CRABP2, FGF10, LCE1B, SPRR2E, SFN, SPINK5, CTNNB1, ACVR1B, COL7A1, SPRR2D, SPRR2A, BCL2, TGM1, POU3F1, IVL, LTB, RUNX3, EDARADD, LCE4A, MAP2K1, NTF3, KLK5, FOXN1, KRT13, LCE2B, KRT10, COL5A2, SCEL, EVPL, KRTAP5-9, EREG, CASP14, LCE1F, FLG, SPRR3, LAMC2, LCE3E	1458	199	13528	1.91164	0.241087	0.019512	0.128974
GOTERM_BP_FAT	GO:0050801~ion homeostasis	70	3.72737	9.7814e-05	CCKAR, JPH4, SLC9A3, CYP11B2, EDNRB, FXN, SAA2, GRIN2B, SAA1, APOE, SLC1A6, GALR2, TRPV4, LTF, SLC4A1, CHRNA1, XCR1, KCNQ1, MT4, C5AR1, ATP4A, SLC34A1, CCDC47, CACNG2, NTSR2, SLC34A2, CCR9, CCR8, PLCE1, CCR3, F2, DLD, NAB1, GPR12, CLDN16, SRI, CCL1, CCL2, DRD3, DRD5, FKBP1A, CLDN11, BDKRB2, CCL5, CCL7, ACSBG1, KCNMB2, CCL23, C11ORF9, AGT, BCL2, POU3F1, SLC30A8, GLRB, NTF3, GRIN1, RHAG, CCL15, TMP…	1458	409	13528	1.588	0.321752	0.0255508	0.181464
GOTERM_BP_FAT	GO:0055082~cellular chemical homeostasis	66	3.51438	0.000101902	CCKAR, JPH4, EDNRB, FXN, SAA2, GRIN2B, SAA1, APOE, SLC1A6, GALR2, TRPV4, LTF, SLC4A1, CHRNA1, XCR1, KCNQ1, MT4, C5AR1, CACNG2, NTSR2, SLC34A2, CCR9, CCR8, PLCE1, CCR3, F2, DLD, NAB1, GPR12, CLDN16, SRI, CCL1, CCL2, DRD3, DRD5, FKBP1A, CLDN11, BDKRB2, CCL5, CCL7, ACSBG1, KCNMB2, CCL23, C11ORF9, AGT, BCL2, POU3F1, SLC30A8, GLRB, NTF3, GRIN1, RHAG, CCL15, TMPRSS3, HPR, ATXN1, CCL13, GCK, HPX, CXCL13…	1458	380	13528	1.61152	0.33267	0.0249626	0.189042
GOTERM_BP_FAT	GO:0006812~cation transport	89	4.73908	0.000101989	PLCZ1, KCNH1, KCNJ16, JPH4, SLC36A2, SLC22A18, SLC9A3, KCNK18, ATP2B1, SLC25A20, CHRNA9, GRIN2B, SLC24A4, KCNK7, TRPV4, LTF, SCN7A, TRPV6, SLC4A4, XCR1, KCNQ1, COX17, NSF, ATP4A, ATP4B, CACNG6, SLC34A1, SLC24A5, CACNG5, CACNG4, GIF, CACNG2, PKD2L1, SLC34A2, KCNA10, ATP6V1A, CATSPER3, CATSPER1, F2, SLC25A37, ATP6V1G3, SRI, KCNA2, KCNA1, SLC39A12, CCL8, SFXN1, FKBP1A, ATP6V1G1, KCNMB1, KCNMB2, KCNS…	1458	553	13528	1.49328	0.332901	0.0235315	0.189203
GOTERM_BP_FAT	GO:0006873~cellular ion homeostasis	65	3.46113	0.000113032	CCKAR, JPH4, EDNRB, FXN, SAA2, GRIN2B, SAA1, APOE, SLC1A6, GALR2, TRPV4, LTF, SLC4A1, CHRNA1, XCR1, KCNQ1, MT4, C5AR1, CACNG2, NTSR2, SLC34A2, CCR9, CCR8, PLCE1, CCR3, F2, DLD, NAB1, GPR12, CLDN16, SRI, CCL1, CCL2, DRD3, DRD5, FKBP1A, CLDN11, BDKRB2, CCL5, CCL7, ACSBG1, KCNMB2, CCL23, C11ORF9, AGT, BCL2, POU3F1, SLC30A8, GLRB, NTF3, GRIN1, RHAG, CCL15, TMPRSS3, HPR, ATXN1, CCL13, HPX, CXCL13, PLN…	1458	374	13528	1.61257	0.361511	0.024617	0.209668
GOTERM_BP_FAT	GO:0006811~ion transport	116	6.17678	0.000130725	SLC36A2, SLC22A18, SLC9A3, CNGB3, ATP2B1, CTTNBP2, SLC25A20, CHRNA9, GRIN2B, KCNK7, SLC4A1, SLC4A4, CHRNA1, CLCA2, SLC34A1, CNGA3, PKD2L1, SLC34A2, CATSPER3, CATSPER1, F2, SLC25A37, AKAP7, ATP6V1G3, SRI, FXYD3, KCNA2, ENPP3, KCNA1, CCL8, SFXN1, KCNMB1, FXYD7, KCNMB2, KCNS1, P2RY6, KCNS2, SLC30A8, HCN4, HCN3, GABRD, ATP5J2, GRIN1, GABRA5, KCTD1, KCTD2, CACNA2D2, KCTD4, ATP13A4, KCTD6, KCNJ5, KCNJ9…	1458	768	13528	1.40143	0.404813	0.0269399	0.242449
GOTERM_BP_FAT	GO:0010033~response to organic substance	110	5.85729	0.000133523	A2M, APOBEC1, OSMR, SLC9A3, RPS6KB1, TLR6, GHRHR, CTNNB1, PRKACG, CTTNBP2, GRIN2B, APOE, LCAT, IFNG, GAB1, PLA2G1B, DDAH2, INSR, APOM, GNG7, F12, PLD1, CRYAB, LIFR, MGP, CNGA3, SLC34A2, UGT1A10, C1QB, RETN, UCN3, MSX1, SERPINF2, HSPB3, IL1R1, CCL2, DRD3, DRD5, ALDOB, CCL5, TIMP3, SRC, HSPA1L, SLC30A8, BMP4, MAP2K1, GNRH1, GRIN1, TGFBR2, EPHX1, SMAD2, ABCG1, BRCA1, ABCB4, CDKN1A, P2RX3, PLCG2, AVP…	1458	721	13528	1.41558	0.411388	0.0261514	0.247633
GOTERM_BP_FAT	GO:0048545~response to steroid hormone stimulus	39	2.07668	0.000146397	A2M, CCL2, TACR3, SLC9A3, TH, ALDOB, RPS6KB1, TSHB, CCL5, TIMP3, GHRHR, SRC, CTNNB1, CTTNBP2, TNFRSF11B, BCL2, LCAT, INSR, BMP4, IL6, MAP2K1, GNRH1, CRYAB, TGFBR2, ESR1, CNGA3, UGT1A1, BRCA1, ABCB4, SLC34A2, UGT1A10, C1QB, CDKN1A, UCN3, CCND1, CA9, AVPR1A, FABP4, RGS9, LCT	1458	192	13528	1.88469	0.440712	0.0272917	0.271478
GOTERM_BP_FAT	GO:0030216~keratinocyte differentiation	19	1.01171	0.000149257	LCE4A, MAP2K1, FOXN1, LCE2B, LCE1B, SPRR2E, SFN, SCEL, EVPL, EREG, LCE1F, FLG, SPRR2D, SPRR2A, TGM1, SPRR3, LCE3E, POU3F1, IVL	1458	66	13528	2.67107	0.447026	0.0265699	0.276774
GOTERM_BP_FAT	GO:0009913~epidermal cell differentiation	20	1.06496	0.000159127	LCE4A, MAP2K1, FOXN1, LCE2B, LCE1B, SPRR2E, SFN, SPINK5, SCEL, EVPL, EREG, LCE1F, FLG, SPRR2D, SPRR2A, TGM1, SPRR3, LCE3E, POU3F1, IVL	1458	72	13528	2.57735	0.468273	0.0270883	0.295052
GOTERM_BP_FAT	GO:0051384~response to glucocorticoid stimulus	21	1.11821	0.000165659	BMP4, A2M, IL6, CCL2, MAP2K1, SLC9A3, ALDOB, RPS6KB1, CCL5, UGT1A1, GHRHR, ABCB4, UGT1A10, C1QB, CCND1, UCN3, CDKN1A, LCAT, BCL2, AVPR1A, FABP4, INSR	1458	78	13528	2.49805	0.481883	0.0270262	0.307146
GOTERM_BP_FAT	GO:0007586~digestion	23	1.22471	0.000201938	CCKAR, SOAT2, COPA, PNLIPRP2, PGC, UGT1A1, SCTR, CEL, KCNN4, AKR1C2, MUC3B, UGT1A10, UCN2, ABCG5, PRSS2, GALR2, SERPINA3, PLA2G1B, MEP1A, MEP1B, HTR3A, AMY2B, AKR1D1, CTRL	1458	91	13528	2.34511	0.551376	0.0315543	0.37429
GOTERM_BP_FAT	GO:0003012~muscle system process	35	1.86368	0.000205987	UTS2, MYBPC1, CALD1, MYBPC3, GJA1, PGAM2, RPS6KB1, FKBP1A, BDKRB2, TTN, EDNRB, LTB4R, AGT, SLMAP, GALR2, SNTB1, KCNE2, MYOM1, SCN7A, CHRNA1, HCN4, KCNQ1, MYH1, CRYAB, MYH7, PDE4D, TRIM63, ARHGEF11, TRDN, TNNT3, P2RX3, KBTBD10, CASQ2, SGCA, CHRNG	1458	168	13528	1.93301	0.558531	0.0309586	0.381783
GOTERM_BP_FAT	GO:0030001~metal ion transport	76	4.04686	0.000212096	PLCZ1, KCNH1, KCNJ16, JPH4, SLC9A3, KCNK18, ATP2B1, CHRNA9, SLC24A4, GRIN2B, KCNK7, TRPV4, LTF, SCN7A, TRPV6, XCR1, SLC4A4, KCNQ1, COX17, NSF, ATP4A, ATP4B, CACNG6, SLC34A1, SLC24A5, CACNG5, CACNG4, GIF, CACNG2, SLC34A2, KCNA10, CATSPER3, CATSPER1, F2, SLC25A37, SRI, KCNA2, SLC39A12, KCNA1, CCL8, SFXN1, FKBP1A, KCNMB1, KCNMB2, KCNS1, KCNS2, SLC39A7, KCNE2, HCN4, SLC30A8, HCN3, SLC39A2, KCNE4, GRI…	1458	465	13528	1.51648	0.569109	0.0307003	0.393084
GOTERM_BP_FAT	GO:0002526~acute inflammatory response	24	1.27796	0.000234229	F12, A2M, IL6, C9, MASP1, MASP2, C5, C4BPA, IL22, CD163, C8A, REG3A, C1QB, ORM1, SAA2, SAA1, SERPINF2, FCN2, CD46, F2, SERPINA3, LBP, REG3G, CFHR5	1458	98	13528	2.27228	0.605354	0.0326606	0.43402
GOTERM_BP_FAT	GO:0055065~metal ion homeostasis	40	2.12993	0.000284162	CLDN16, CCL1, JPH4, CCKAR, CCL2, DRD3, CYP11B2, DRD5, FKBP1A, BDKRB2, CCL5, CCL7, EDNRB, CCL23, SAA2, APOE, SAA1, BCL2, AGT, GALR2, TRPV4, XCR1, MT4, C5AR1, GRIN1, CCDC47, CCL15, TMPRSS3, CCR9, CCR8, PLCE1, CCL13, CXCL13, CCR3, PLN, PLCG2, F2, AVPR1A, GPR12, ATP7B	1458	205	13528	1.81043	0.67632	0.0381498	0.526314
GOTERM_BP_FAT	GO:0032101~regulation of response to external stimulus	33	1.75719	0.000346662	A2M, DRD3, MASP1, OSMR, FGF10, TSPAN8, CCL5, TNFRSF1A, SAA2, APOE, SAA1, AGT, APOH, GP1BA, HRG, LBP, FCER1A, F11, F12, IL6, IL2RA, TGFBR2, GRIN1, PLG, PROC, CTNNA2, LEP, CDH13, SERPINF2, F2, FABP4, GHSR, SELE	1458	159	13528	1.92572	0.747448	0.0448351	0.64172
GOTERM_BP_FAT	GO:0050878~regulation of body fluid levels	30	1.59744	0.000442607	COPA, C9, ADAMTS13, CYP11B2, DTNBP1, GP5, ANXA8, FGG, LPA, SAA2, SAA1, BLOC1S3, APOH, GP1BA, GUCA2B, TFPI2, ENTPD2, F11, F12, IL6, TP73, PLG, PROC, P2RY12, CEL, KCNN4, CD36, F2, LACRT, AGR2	1458	141	13528	1.97414	0.827455	0.0551041	0.818639
GOTERM_BP_FAT	GO:0007338~single fertilization	17	0.905218	0.000452005	PLCZ1, GLRB, OVGP1, ZP2, ZP3, SMCP, ZP4, TNP1, HYAL4, OR10J1, TNP2, ELSPBP1, TRIM36, CD46, CATSPER1, SPAM1, AKAP3	1458	60	13528	2.6289	0.833775	0.0545322	0.835953
GOTERM_BP_FAT	GO:0007626~locomotory behavior	49	2.60916	0.000456148	FGF10, EDNRB, SAA2, FXN, SAA1, IFNG, PLA2G1B, XCR1, GNG7, PLD1, C5AR1, CMKLR1, CCL4L2, GRM1, CCR9, CCR8, LYST, CCR3, CX3CR1, RELN, PTAFR, CCL1, CCL2, DRD3, ENPP2, TH, C5, FPR1, CCL8, CCL5, CCL7, ESPN, DOCK2, CCL23, PDE1B, CCBP2, LECT2, DEFB1, IL4, DMBX1, IL6, GLRB, MAP2K1, GRIN1, CCL15, ATXN1, CCL13, CXCL13, CMTM5	1458	274	13528	1.65929	0.836487	0.0533962	0.843584
GOTERM_BP_FAT	GO:0006875~cellular metal ion homeostasis	38	2.02343	0.000469423	CLDN16, CCL1, JPH4, CCKAR, CCL2, DRD3, DRD5, FKBP1A, BDKRB2, CCL5, CCL7, EDNRB, CCL23, SAA2, APOE, SAA1, BCL2, AGT, GALR2, TRPV4, XCR1, MT4, C5AR1, GRIN1, CCL15, TMPRSS3, CCR9, CCR8, PLCE1, CCL13, CXCL13, CCR3, PLN, PLCG2, F2, AVPR1A, GPR12, ATP7B	1458	196	13528	1.79889	0.844883	0.0533361	0.868034
GOTERM_BP_FAT	GO:0009615~response to virus	25	1.3312	0.00047801	APOBEC1, CCL8, IFNW1, CCL5, IFNA1, BCL2, IFNA5, IFNA4, IFNG, IFNK, IL6, SPACA3, IFNA10, CCL4L2, IFI16, HBXIP, TRIM22, LILRB1, ABCC9, LYST, IFNA14, IFNA13, IL28B, IFNA16, DMBT1	1458	109	13528	2.12809	0.850083	0.0527756	0.883845
GOTERM_BP_FAT	GO:0019226~transmission of nerve impulse	59	3.14164	0.000543529	PMCHL2, UTS2, CTNNB1, CTTNBP2, GRIN2B, APOE, SLC1A6, GALR2, CHRNA1, HTR1D, NPFF, HTR1E, GPR176, CACNG4, NRXN1, CACNG2, PDYN, GRM1, CTNNA2, GRM5, CHRM5, GRM8, GRM7, NAB1, SDCBP, PPFIA3, DRD3, DRD5, TH, KCNA1, CLDN11, PCDHB11, KCNMB1, KCNMB2, ACSBG1, HCRTR1, HRH1, C11ORF9, NPTX2, SYN3, POU3F1, HTR3A, GABRD, DLGAP1, GLRB, NTF3, GABRA5, GRIN1, ATXN1, SLC17A7, GRIA2, P2RX3, KCNN3, CRH, TMOD2, CHRNB3, …	1458	350	13528	1.56408	0.884427	0.0581793	1.00441
GOTERM_BP_FAT	GO:0009566~fertilization	20	1.06496	0.000574131	PLCZ1, GLRB, OVGP1, ZP2, SMCP, ZP3, ZP4, TNP1, SYCP2, HYAL4, OR10J1, TNP2, ELSPBP1, TRIM36, TEX15, CD46, PVRL3, CATSPER1, SPAM1, AKAP3	1458	79	13528	2.34898	0.897652	0.0597457	1.06068
GOTERM_BP_FAT	GO:0010817~regulation of hormone levels	31	1.65069	0.000654668	HSD3B1, PRLHR, HSD17B1, LTBP4, CYP11B2, CRABP2, GHRHR, ECE1, AKR1C4, SERPINA6, AGT, TRPV4, PCSK6, SLC30A8, IL6, TBX3, SMAD2, UGT1A1, LEP, RDH12, AFP, UGT1A10, CYP17A1, SULT1B1, CRH, MC4R, RELN, DIO1, GHSR, AKR1D1, SMPD3, CRYM	1458	151	13528	1.90485	0.925669	0.0661138	1.20861
GOTERM_BP_FAT	GO:0006869~lipid transport	30	1.59744	0.000714254	MSR1, DRD3, ATP10A, BDKRB2, ABCA4, SLC25A20, LPA, APOE, LCAT, APOC4, APOA5, ATP8B1, APOH, PLA2G1B, LBP, APOM, SOAT2, OSBPL5, OSBPL2, ABCG1, MTTP, APOL3, CEL, KCNN4, ABCG5, CD36, ATP9A, OSBPL10, LIPC, APOL5	1458	145	13528	1.91968	0.941333	0.0701342	1.31793
GOTERM_BP_FAT	GO:0006953~acute-phase response	13	0.692226	0.000732523	IL6, A2M, IL22, CD163, REG3A, ORM1, SAA2, SERPINF2, SAA1, F2, SERPINA3, REG3G, LBP	1458	40	13528	3.0155	0.94544	0.0701307	1.35142
GOTERM_BP_FAT	GO:0055088~lipid homeostasis	15	0.798722	0.000737318	SOAT2, LPL, ABCG1, MTTP, G6PC, ABCG5, APOE, LCAT, APOC4, APOA5, FABP4, NR5A2, LIPC, ANGPTL3, APOM	1458	51	13528	2.72896	0.946469	0.0689128	1.36021
GOTERM_BP_FAT	GO:0060191~regulation of lipase activity	21	1.11821	0.000773601	CCKAR, C5AR1, DRD5, FKBP1A, NTSR2, GRM5, EDNRB, PLCE1, HRH1, P2RY6, LTB4R, AGT, APOA5, APOH, PLA2G1B, AVPR1A, MS4A2, ANGPTL3, NMBR, SELE, HTR2A	1458	87	13528	2.23963	0.953653	0.0705233	1.42669
GOTERM_BP_FAT	GO:0060193~positive regulation of lipase activity	19	1.01171	0.000814717	CCKAR, C5AR1, DRD5, NTSR2, GRM5, EDNRB, PLCE1, HRH1, P2RY6, LTB4R, AGT, APOA5, APOH, PLA2G1B, AVPR1A, MS4A2, NMBR, SELE, HTR2A	1458	75	13528	2.35054	0.960637	0.0724707	1.50198
GOTERM_BP_FAT	GO:0007155~cell adhesion	103	5.48456	0.000836261	CTNNAL1, MTSS1, JUB, LMO7, CTNNB1, AZGP1, REG3A, GP5, CDH26, CLCA2, ROCK1, PTPRS, MGP, CCL4L2, ACTN3, CTNNA3, CTNNA2, CCR8, PODXL2, PGM5, CD36, CCR3, LSAMP, CD33, CX3CR1, RELN, LAMC2, IBSP, ITGAL, OLFM4, CCL2, PCDH20, ITGAE, DSCAML1, OTOR, CCL5, SRC, ITGBL1, PVRL3, ITGB6, TEK, PCDHA13, SPAM1, ANGPTL3, RPSA, LPP, CELSR2, PCDH15, TINAG, COL14A1, DSG1, CLEC7A, CLDN8, AEBP1, OPCML, MYBPC1, CLDN6, MYB…	1458	700	13528	1.36526	0.963866	0.0726888	1.5414
GOTERM_BP_FAT	GO:0022610~biological adhesion	103	5.48456	0.000856515	CTNNAL1, MTSS1, JUB, LMO7, CTNNB1, AZGP1, REG3A, GP5, CDH26, CLCA2, ROCK1, PTPRS, MGP, CCL4L2, ACTN3, CTNNA3, CTNNA2, CCR8, PODXL2, PGM5, CD36, CCR3, LSAMP, CD33, CX3CR1, RELN, LAMC2, IBSP, ITGAL, OLFM4, CCL2, PCDH20, ITGAE, DSCAML1, OTOR, CCL5, SRC, ITGBL1, PVRL3, ITGB6, TEK, PCDHA13, SPAM1, ANGPTL3, RPSA, LPP, CELSR2, PCDH15, TINAG, COL14A1, DSG1, CLEC7A, CLDN8, AEBP1, OPCML, MYBPC1, CLDN6, MYB…	1458	701	13528	1.36331	0.966659	0.0727917	1.57846
GOTERM_BP_FAT	GO:0030003~cellular cation homeostasis	45	2.39617	0.000978406	CLDN16, SRI, CCL1, JPH4, CCKAR, CCL2, DRD3, DRD5, FKBP1A, BDKRB2, CCL5, CCL7, EDNRB, CCL23, FXN, SAA2, APOE, SAA1, BCL2, AGT, GALR2, TRPV4, LTF, SLC30A8, XCR1, MT4, C5AR1, GRIN1, CCL15, TMPRSS3, HPR, CCR9, CCR8, PLCE1, CCL13, CXCL13, HPX, CCR3, PLN, PLCG2, MT2A, F2, AVPR1A, GPR12, ATP7B	1458	254	13528	1.64382	0.979456	0.0809922	1.80116
GOTERM_BP_FAT	GO:0019725~cellular homeostasis	73	3.88711	0.000988085	CCKAR, JPH4, EDNRB, FXN, SAA2, GRIN2B, SAA1, APOE, SLC1A6, GALR2, TRPV4, LTF, SLC4A1, CHRNA1, XCR1, KCNQ1, MT4, C5AR1, CACNG2, PFKM, NTSR2, SLC34A2, CCR9, CCR8, PLCE1, TXNDC2, CCR3, F2, DLD, NAB1, GPR12, CLDN16, SRI, CCL1, C17ORF37, CCL2, DRD3, DRD5, MUTED, FKBP1A, CLDN11, BDKRB2, CCL5, CCL7, ACSBG1, KCNMB2, CCL23, C11ORF9, AGT, BCL2, PDILT, POU3F1, SLC30A8, GLRB, NTF3, GRIN1, RHAG, CCL15, HPR, T…	1458	466	13528	1.45349	0.980231	0.0800923	1.81883
GOTERM_BP_FAT	GO:0009719~response to endogenous stimulus	65	3.46113	0.00104172	A2M, APOBEC1, TACR3, SLC9A3, RPS6KB1, GHRHR, CTNNB1, PRKACG, CTTNBP2, TNFRSF11B, LCAT, GAB1, PLA2G1B, INSR, GNG7, PLD1, ATP4B, CRYAB, ESR1, MGP, CNGA3, UGT1A1, SLC34A2, UGT1A10, C1QB, RETN, CCND1, UCN3, CA9, GNB4, GNAS, LCT, CCL2, DRD3, DRD5, TH, ALDOB, UROS, PRKDC, TSHB, CCL5, TIMP3, SRC, BCL2, BMP4, IL6, MAP2K1, GNRH1, HCLS1, TGFBR2, GRIN1, BRCA1, ABCG1, ABCB4, PCK1, GCG, LEP, CDH13, CDKN1A, MC…	1458	405	13528	1.48914	0.984025	0.0825725	1.91665
GOTERM_BP_FAT	GO:0050819~negative regulation of coagulation	10	0.532481	0.0010809	F11, F12, APOE, F2, APOH, GP1BA, TSPAN8, ANXA4, PLG, PROC	1458	26	13528	3.56864	0.986328	0.0838727	1.98805
GOTERM_BP_FAT	GO:0018904~organic ether metabolic process	15	0.798722	0.00111666	LPL, PNLIPRP2, CYP1A2, SIRT1, PCK1, MTTP, CEL, PLCE1, G6PC, APOE, APOA5, APOH, LIPC, LIPE, LIPF	1458	53	13528	2.62598	0.988139	0.0848704	2.05318
GOTERM_BP_FAT	GO:0010517~regulation of phospholipase activity	18	0.958466	0.00115732	CCKAR, C5AR1, DRD5, NTSR2, GRM5, EDNRB, PLCE1, HRH1, P2RY6, LTB4R, AGT, PLA2G1B, AVPR1A, MS4A2, ANGPTL3, NMBR, SELE, HTR2A	1458	71	13528	2.35229	0.989908	0.0861771	2.12718
GOTERM_BP_FAT	GO:0030005~cellular di-, tri-valent inorganic cation homeostasis	41	2.18317	0.00116557	SRI, CCL1, JPH4, CCKAR, CCL2, DRD3, DRD5, FKBP1A, BDKRB2, CCL5, CCL7, EDNRB, CCL23, FXN, SAA2, APOE, SAA1, BCL2, GALR2, TRPV4, LTF, SLC30A8, XCR1, C5AR1, GRIN1, CCL15, HPR, CCR9, CCR8, PLCE1, CCL13, CXCL13, HPX, CCR3, PLN, PLCG2, F2, MT2A, AVPR1A, GPR12, ATP7B	1458	227	13528	1.67585	0.990234	0.0851691	2.14219
GOTERM_BP_FAT	GO:0010038~response to metal ion	27	1.4377	0.00116773	XDH, APOBEC1, ALDOB, PGAM2, TSHB, TTN, KCNMB1, KCNMB2, CTNNB1, TNFRSF11B, FGG, FXN, BCL2, DDX19B, LCAT, NDRG1, INSR, S100A16, SLC34A1, MGP, CNGA3, CCND1, GRIA2, PLCG2, MAPK8, LCT, ATP7B	1458	129	13528	1.942	0.990317	0.0837799	2.14613
GOTERM_BP_FAT	GO:0055080~cation homeostasis	49	2.60916	0.00119622	CCKAR, JPH4, CYP11B2, SLC9A3, EDNRB, SAA2, FXN, SAA1, APOE, GALR2, LTF, TRPV4, XCR1, MT4, C5AR1, ATP4A, CCDC47, CCR9, CCR8, PLCE1, CCR3, F2, GPR12, CCL1, SRI, CLDN16, CCL2, DRD3, DRD5, FKBP1A, BDKRB2, CCL5, CCL7, CCL23, AGT, BCL2, SLC30A8, GRIN1, CCL15, TMPRSS3, HPR, CCL13, CXCL13, HPX, PLN, PLCG2, MT2A, AVPR1A, ATP7B	1458	286	13528	1.58967	0.991354	0.0842159	2.19793
GOTERM_BP_FAT	GO:0051917~regulation of fibrinolysis	6	0.319489	0.00124943	F11, F12, SERPINF2, APOH, HRG, PLG	1458	9	13528	6.18564	0.993002	0.0862699	2.29464
GOTERM_BP_FAT	GO:0010876~lipid localization	31	1.65069	0.0012651	MSR1, DRD3, ATP10A, BDKRB2, ABCA4, SLC25A20, LPA, APOE, LCAT, APOC4, APOA5, ATP8B1, APOH, PLA2G1B, LBP, ANGPTL3, APOM, SOAT2, OSBPL5, OSBPL2, ABCG1, MTTP, APOL3, CEL, KCNN4, ABCG5, CD36, ATP9A, OSBPL10, LIPC, APOL5	1458	157	13528	1.83205	0.993424	0.0858134	2.32309
GOTERM_BP_FAT	GO:0019935~cyclic-nucleotide-mediated signaling	27	1.4377	0.00131346	CCL2, DRD3, DRD5, FPR1, GHRHR, APOE, HRH2, AGT, CNR1, GALR2, HTR1D, XCR1, TUBB3, HTR1E, FSHR, SSTR4, P2RY12, UCN3, CHRM5, CD36, SSTR3, CCR3, MC2R, MC4R, GNAS, CORT, PDZD3	1458	130	13528	1.92707	0.994574	0.0874553	2.41087
GOTERM_BP_FAT	GO:0015672~monovalent inorganic cation transport	53	2.82215	0.00139044	KCNH1, KCNJ16, SLC36A2, SLC9A3, KCNK18, SLC24A4, KCNK7, SCN7A, SLC4A4, KCNQ1, NSF, ATP4A, ATP4B, SLC24A5, SLC34A1, SLC34A2, KCNA10, ATP6V1A, CATSPER3, ATP6V1G3, KCNA2, KCNA1, ATP6V1G1, KCNMB1, KCNMB2, KCNS1, KCNS2, KCNE2, HCN4, HCN3, KCNE4, ATP5J2, KCTD1, KCTD2, SLC10A2, KCTD4, KCNV2, KCTD6, KCNJ5, SLC17A7, KCNN4, ABCC9, KCNJ9, SLC17A4, ATP6V1E1, KCNN3, SLC17A1, SLC17A2, SLC13A1, SLC5A8, ATP5A1, …	1458	318	13528	1.54641	0.996004	0.0908232	2.55046
GOTERM_BP_FAT	GO:0051345~positive regulation of hydrolase activity	34	1.81044	0.00140426	CCKAR, C9, DRD5, MYBPC3, ALDOB, TNFSF15, POT1, EDNRB, P2RY6, HRH1, LTB4R, AGT, IFNG, APOA5, APOH, PLA2G1B, MS4A2, COL4A3, C5AR1, MSH3, MAP2K1, ARHGAP27, WRN, NTSR2, GRM5, PLCE1, SYDE1, BBC3, F2, AVPR1A, RGS9, NMBR, SELE, HTR2A	1458	179	13528	1.76239	0.996218	0.0902019	2.5755
GOTERM_BP_FAT	GO:0006641~triglyceride metabolic process	13	0.692226	0.0014828	LPL, PNLIPRP2, SIRT1, MTTP, PCK1, CEL, G6PC, APOE, APOA5, APOH, LIPC, LIPE, LIPF	1458	43	13528	2.80512	0.997232	0.093496	2.71767
GOTERM_BP_FAT	GO:0045087~innate immune response	28	1.49095	0.00150793	TNFAIP8L2, IL1R1, KYNU, C9, MASP1, MASP2, C5, TLR6, TNFRSF1A, FCN2, CD46, PGLYRP2, DEFB118, LBP, CFHR5, DEFB1, F12, IL18RAP, NCF2, PLUNC, IL1RL1, C4BPA, C20ORF185, C8A, C1QB, LYST, CLEC7A, DMBT1	1458	138	13528	1.88259	0.997495	0.093522	2.76313
GOTERM_BP_FAT	GO:0006639~acylglycerol metabolic process	14	0.745474	0.00159088	LPL, PNLIPRP2, SIRT1, MTTP, PCK1, CEL, PLCE1, G6PC, APOE, APOA5, APOH, LIPC, LIPE, LIPF	1458	49	13528	2.65099	0.998199	0.0969009	2.913
GOTERM_BP_FAT	GO:0006968~cellular defense response	16	0.85197	0.00166264	IL4, PNLIPRP2, C5AR1, NCF2, CD160, UMOD, CD5L, CCL5, NCR2, CCR9, ZNF148, CCR3, CX3CR1, MNDA, LBP, KIR3DL2	1458	61	13528	2.4337	0.998646	0.0995256	3.04249
GOTERM_BP_FAT	GO:0055092~sterol homeostasis	12	0.638978	0.00167154	SOAT2, G6PC, ABCG5, APOE, LCAT, FABP4, NR5A2, ANGPTL3, LIPC, APOM, ABCG1, MTTP	1458	38	13528	2.93004	0.998693	0.0985481	3.05855
GOTERM_BP_FAT	GO:0042632~cholesterol homeostasis	12	0.638978	0.00167154	SOAT2, G6PC, ABCG5, APOE, LCAT, FABP4, NR5A2, ANGPTL3, LIPC, APOM, ABCG1, MTTP	1458	38	13528	2.93004	0.998693	0.0985481	3.05855
GOTERM_BP_FAT	GO:0007268~synaptic transmission	50	2.66241	0.00167286	PMCHL2, UTS2, CTNNB1, CTTNBP2, GRIN2B, APOE, SLC1A6, GALR2, HTR1D, CHRNA1, NPFF, HTR1E, GPR176, NRXN1, PDYN, GRM1, CTNNA2, GRM5, GRM8, GRM7, SDCBP, PPFIA3, DRD3, DRD5, TH, KCNA1, PCDHB11, KCNMB1, HCRTR1, HRH1, NPTX2, SYN3, HTR3A, GABRD, DLGAP1, GLRB, NTF3, GRIN1, GABRA5, ATXN1, SLC17A7, GRIA2, KCNN3, P2RX3, CRH, TMOD2, CHRNB3, GHSR, CORT, HTR2A	1458	298	13528	1.55679	0.9987	0.0971809	3.06092
GOTERM_BP_FAT	GO:0055074~calcium ion homeostasis	35	1.86368	0.00168195	CCL1, JPH4, CCKAR, CCL2, DRD3, DRD5, FKBP1A, BDKRB2, CCL5, CCL7, EDNRB, CCL23, SAA2, APOE, SAA1, BCL2, GALR2, TRPV4, XCR1, C5AR1, GRIN1, CCDC47, CCL15, CCR9, CCR8, CCL13, PLCE1, CXCL13, CCR3, PLN, PLCG2, F2, AVPR1A, GPR12, ATP7B	1458	188	13528	1.72737	0.998746	0.0962764	3.07731
GOTERM_BP_FAT	GO:0006813~potassium ion transport	31	1.65069	0.0017237	KCNJ16, KCNH1, KCNA2, KCNA1, KCNK18, KCNMB1, KCNMB2, KCNS1, KCNS2, SLC24A4, KCNK7, KCNE2, HCN4, KCNQ1, HCN3, NSF, KCNE4, ATP4A, ATP4B, KCTD1, SLC24A5, KCTD2, KCNV2, KCTD4, KCTD6, KCNJ5, KCNA10, KCNN4, ABCC9, KCNJ9, KCNN3	1458	160	13528	1.7977	0.998938	0.0971491	3.15253
GOTERM_BP_FAT	GO:0055066~di-, tri-valent inorganic cation homeostasis	42	2.23642	0.00172891	SRI, CCL1, JPH4, CCKAR, CCL2, DRD3, DRD5, FKBP1A, BDKRB2, CCL5, CCL7, EDNRB, CCL23, FXN, SAA2, APOE, SAA1, BCL2, GALR2, TRPV4, LTF, SLC30A8, XCR1, C5AR1, GRIN1, CCDC47, CCL15, HPR, CCR9, CCR8, PLCE1, CCL13, CXCL13, HPX, CCR3, PLN, PLCG2, MT2A, F2, AVPR1A, GPR12, ATP7B	1458	239	13528	1.63052	0.998959	0.0960665	3.16192
GOTERM_BP_FAT	GO:0016337~cell-cell adhesion	47	2.50266	0.00172927	CLDN16, CLDN8, ITGAL, CLDN18, CLDN6, PCDH20, LMO7, DSCAML1, PCDHGC5, CDH1, PCDHB12, CLDN11, OTOR, PCDHB11, SRC, CDH6, CTNNB1, VCAM1, CDH7, REG3A, PVRL3, BCL2, TEK, FAT2, TSTA3, CDH26, PCDHA13, CEACAM1, PCDHB7, OLR1, ROCK1, PCDHB1, MGP, PCDH15, CELSR2, CLDN20, CTNNA3, CTNNA2, CDH13, COL14A1, CDH15, CDH18, DSG1, DSC1, CNTN4, CLEC7A, SELE	1458	276	13528	1.58003	0.998961	0.0947613	3.16257
GOTERM_BP_FAT	GO:0009725~response to hormone stimulus	59	3.14164	0.00173678	A2M, APOBEC1, TACR3, SLC9A3, RPS6KB1, GHRHR, CTNNB1, PRKACG, CTTNBP2, TNFRSF11B, LCAT, GAB1, PLA2G1B, INSR, GNG7, PLD1, CRYAB, ESR1, MGP, CNGA3, UGT1A1, SLC34A2, UGT1A10, C1QB, RETN, CCND1, UCN3, CA9, GNAS, GNB4, LCT, CCL2, TH, ALDOB, PRKDC, TSHB, CCL5, TIMP3, SRC, BCL2, BMP4, IL6, MAP2K1, GNRH1, HCLS1, TGFBR2, BRCA1, ABCG1, ABCB4, PCK1, LEP, GCG, CDKN1A, MC4R, AVPR1A, FABP4, RGS9, GHSR, PARP1, A…	1458	367	13528	1.49163	0.998991	0.0938596	3.1761
GOTERM_BP_FAT	GO:0046903~secretion	50	2.66241	0.00192965	COPA, SLC22A18, LTBP4, TXLNA, GHRHR, SCTR, ANK1, PLA2G1B, MS4A2, TRPV4, GUCA2B, RPH3AL, LAT2, TRIM36, CA9, LACRT, GNAS, AKAP3, SNAP29, CLDN16, CPLX4, PPFIA3, DRD3, CCL8, BDKRB2, CCL5, KIRREL, BLOC1S3, AGT, SYN3, NFAT5, EXOC6, PCSK6, SLC30A8, FCER1A, IL6, GLRB, TBX3, SCRN1, SMAD2, TP73, TNP2, LEP, KCNN4, CEL, ABCG5, MC4R, GHSR, AGR2, SMPD3	1458	300	13528	1.54641	0.999532	0.102349	3.52285
GOTERM_BP_FAT	GO:0006638~neutral lipid metabolic process	14	0.745474	0.00194155	LPL, PNLIPRP2, SIRT1, MTTP, PCK1, CEL, PLCE1, G6PC, APOE, APOA5, APOH, LIPC, LIPE, LIPF	1458	50	13528	2.59797	0.999553	0.101593	3.54421
GOTERM_BP_FAT	GO:0030195~negative regulation of blood coagulation	9	0.479233	0.00197297	F11, F12, APOE, F2, APOH, GP1BA, TSPAN8, PLG, PROC	1458	23	13528	3.6307	0.999606	0.101812	3.60058
GOTERM_BP_FAT	GO:0006874~cellular calcium ion homeostasis	34	1.81044	0.00204871	CCL1, JPH4, CCKAR, CCL2, DRD3, DRD5, FKBP1A, BDKRB2, CCL5, CCL7, EDNRB, CCL23, SAA2, APOE, SAA1, BCL2, GALR2, TRPV4, XCR1, C5AR1, GRIN1, CCL15, CCR9, CCR8, CCL13, PLCE1, CXCL13, CCR3, PLN, F2, PLCG2, AVPR1A, GPR12, ATP7B	1458	183	13528	1.72387	0.999708	0.104162	3.73633
GOTERM_BP_FAT	GO:0042127~regulation of cell proliferation	111	5.91054	0.00224868	FGF18, BMP10, RARRES1, APOBEC1, OSMR, RBM5, TNFSF15, FGF10, RPS6KB1, NR2E1, GHRHR, IL31RA, CTNNB1, AZGP1, CTTNBP2, APOE, IFNG, GATA4, APOH, PLA2G1B, IFNK, INSR, LIFR, IL21, SSTR4, MSX1, SSTR3, CD33, CCL2, DRD3, STK11, UMOD, BDKRB2, HOXA3, REG1A, BLOC1S2, TEK, GML, B4GALT7, RUNX3, BMP4, KLF5, TESC, GNRH1, TGFBR2, RPS9, SMAD2, GUCY2C, BRCA1, FOXP2, NOTCH2, CBLB, CDKN1A, DLX5, AVPR1A, FABP4, MAB21L2…	1458	787	13528	1.30865	0.999868	0.112311	4.09386
GOTERM_BP_FAT	GO:0030194~positive regulation of blood coagulation	6	0.319489	0.0022778	F12, SERPINF2, F2, APOH, HRG, PLG	1458	10	13528	5.56708	0.999883	0.112273	4.14583
GOTERM_BP_FAT	GO:0010518~positive regulation of phospholipase activity	17	0.905218	0.00227987	CCKAR, C5AR1, DRD5, NTSR2, GRM5, EDNRB, PLCE1, HRH1, P2RY6, LTB4R, AGT, PLA2G1B, AVPR1A, MS4A2, NMBR, SELE, HTR2A	1458	69	13528	2.286	0.999884	0.110994	4.14952
GOTERM_BP_FAT	GO:0006662~glycerol ether metabolic process	14	0.745474	0.00235352	LPL, PNLIPRP2, SIRT1, MTTP, PCK1, CEL, PLCE1, G6PC, APOE, APOA5, APOH, LIPC, LIPE, LIPF	1458	51	13528	2.54703	0.999913	0.11299	4.28081
GOTERM_BP_FAT	GO:0007187~G-protein signaling, coupled to cyclic nucleotide second messenger	24	1.27796	0.00242481	CCL2, DRD3, DRD5, FPR1, FSHR, GHRHR, SSTR4, P2RY12, UCN3, CHRM5, SSTR3, HRH2, CCR3, CNR1, AGT, MC2R, GALR2, MC4R, GNAS, CORT, XCR1, HTR1D, TUBB3, HTR1E	1458	115	13528	1.93638	0.999935	0.114827	4.40774
GOTERM_BP_FAT	GO:0019953~sexual reproduction	70	3.72737	0.00243325	PLCZ1, RAD51C, SMCP, GMCL1L, PGAM2, MLH1, RPS6KB1, PTTG2, TBP, PRKACG, ZNF148, CD46, RPL39L, OR7C1, SEMG1, ZP2, ZP3, ZP4, HYAL4, MORC1, FSHR, OR10J1, NME5, TXNDC2, TRIM36, EREG, CATSPER3, SPATA19, CATSPER1, DLD, TESK1, DMC1, AKAP3, ACSBG2, PRKDC, PAQR7, CLDN11, SYCP2, SYCP1, PAQR5, DUSP13, PVRL3, BCL2, AGT, PDILT, DEFB118, SPATA3, PPP2R2B, SPAM1, SPATA6, SPATA5, PPAP2B, SPATA7, BMP4, GLRB, OVGP1,…	1458	458	13528	1.41811	0.999937	0.113848	4.42275
GOTERM_BP_FAT	GO:0050817~coagulation	22	1.17146	0.00254358	F11, F12, IL6, C9, ADAMTS13, DTNBP1, PLG, PROC, P2RY12, FGG, GP5, ANXA8, LPA, CD36, SAA2, SAA1, BLOC1S3, F2, APOH, GP1BA, TFPI2, ENTPD2	1458	102	13528	2.00124	0.999959	0.117322	4.61884
GOTERM_BP_FAT	GO:0007596~blood coagulation	22	1.17146	0.00254358	F11, F12, IL6, C9, ADAMTS13, DTNBP1, PLG, PROC, P2RY12, FGG, GP5, ANXA8, LPA, CD36, SAA2, SAA1, BLOC1S3, F2, APOH, GP1BA, TFPI2, ENTPD2	1458	102	13528	2.00124	0.999959	0.117322	4.61884
GOTERM_BP_FAT	GO:0008202~steroid metabolic process	36	1.91693	0.00305373	CYP3A4, GC, CYP3A5, HSD3B1, HSD17B2, HSD17B1, CYP11B2, AKR1C2, AKR1C4, APOE, SERPINA6, LCAT, ATP8B1, ANGPTL3, CYP19A1, IL4, SOAT2, OSBPL5, OSBPL2, NR0B2, UGT1A1, ABCG1, LEP, AFP, CEL, UGT1A10, CYP17A1, G6PC, SULT1B1, CRH, OSBPL10, IDI2, LIPC, NR5A2, AKR1D1, MBTPS1, LIPE	1458	202	13528	1.65359	0.999995	0.137599	5.52057
GOTERM_BP_FAT	GO:0007202~activation of phospholipase C activity	16	0.85197	0.00324167	CCKAR, C5AR1, DRD5, NTSR2, GRM5, EDNRB, PLCE1, HRH1, P2RY6, LTB4R, AGT, AVPR1A, MS4A2, NMBR, SELE, HTR2A	1458	65	13528	2.28393	0.999997	0.143813	5.85073
GOTERM_BP_FAT	GO:0010863~positive regulation of phospholipase C activity	16	0.85197	0.00324167	CCKAR, C5AR1, DRD5, NTSR2, GRM5, EDNRB, PLCE1, HRH1, P2RY6, LTB4R, AGT, AVPR1A, MS4A2, NMBR, SELE, HTR2A	1458	65	13528	2.28393	0.999997	0.143813	5.85073
GOTERM_BP_FAT	GO:0050818~regulation of coagulation	12	0.638978	0.00324566	F11, F12, APOE, SERPINF2, F2, APOH, GP1BA, TSPAN8, HRG, ANXA4, PLG, PROC	1458	41	13528	2.71565	0.999998	0.142391	5.85773
GOTERM_BP_FAT	GO:0048247~lymphocyte chemotaxis	5	0.266241	0.00358723	DOCK2, CCL2, SAA2, SAA1, CCL5	1458	7	13528	6.62747	0.999999	0.15448	6.45493
GOTERM_BP_FAT	GO:0034369~plasma lipoprotein particle remodeling	8	0.425985	0.00362259	LPL, APOE, AGT, LCAT, APOA5, LIPC, APOM, ABCG1	1458	20	13528	3.71139	0.999999	0.154215	6.51657
GOTERM_BP_FAT	GO:0034367~macromolecular complex remodeling	8	0.425985	0.00362259	LPL, APOE, AGT, LCAT, APOA5, LIPC, APOM, ABCG1	1458	20	13528	3.71139	0.999999	0.154215	6.51657
GOTERM_BP_FAT	GO:0034368~protein-lipid complex remodeling	8	0.425985	0.00362259	LPL, APOE, AGT, LCAT, APOA5, LIPC, APOM, ABCG1	1458	20	13528	3.71139	0.999999	0.154215	6.51657
GOTERM_BP_FAT	GO:0030193~regulation of blood coagulation	11	0.585729	0.00374862	F11, F12, APOE, SERPINF2, F2, APOH, GP1BA, TSPAN8, HRG, PLG, PROC	1458	36	13528	2.83509	1	0.157461	6.73587
GOTERM_BP_FAT	GO:0046425~regulation of JAK-STAT cascade	11	0.585729	0.00374862	IL4, IL6, IL5, HPX, HCLS1, PPP2CA, IFNG, PRL, IL22, IL31RA, IL22RA2	1458	36	13528	2.83509	1	0.157461	6.73587
GOTERM_BP_FAT	GO:0042742~defense response to bacterium	23	1.22471	0.00375025	LALBA, PLD1, SPACA3, IL6, DEFB106A, IL27RA, DEFB125, DEFB103A, DEFB129, TLR6, HTN3, TNFRSF1A, BPI, HIST1H2BI, DEFA5, PGLYRP2, LYST, IFNG, DEFB118, LTF, LBP, DEFB1, DMBT1	1458	112	13528	1.9054	1	0.155882	6.73871
GOTERM_BP_FAT	GO:0006959~humoral immune response	18	0.958466	0.00390464	IL6, CCL2, C9, MASP1, MASP2, C5, C4BPA, C8A, C1QB, FCN2, CD46, BCL2, LTF, MS4A2, CFHR5, LTA, CD28, DMBT1	1458	79	13528	2.11408	1	0.160098	7.0067
GOTERM_BP_FAT	GO:0010035~response to inorganic substance	36	1.91693	0.00390554	XDH, A2M, APOBEC1, ALDOB, UROS, PGAM2, TSHB, TTN, KCNMB1, KCNMB2, CTNNB1, TNFRSF11B, FGG, FXN, APOE, EPX, LCAT, BCL2, DDX19B, NDRG1, INSR, S100A16, OLR1, CRYAB, SLC34A1, MGP, MYH7, CNGA3, CDKN1A, CCND1, GRIA2, PLCG2, AVPR1A, MAPK8, LCT, ATP7B	1458	205	13528	1.62939	1	0.158502	7.00825
GOTERM_BP_FAT	GO:0042445~hormone metabolic process	22	1.17146	0.00411201	HSD3B1, PRLHR, HSD17B1, CYP11B2, CRABP2, UGT1A1, GHRHR, LEP, RDH12, AFP, UGT1A10, CYP17A1, AKR1C4, ECE1, SERPINA6, SULT1B1, AGT, CRH, RELN, DIO1, PCSK6, AKR1D1, CRYM	1458	106	13528	1.92572	1	0.164493	7.3655
GOTERM_BP_FAT	GO:0030301~cholesterol transport	11	0.585729	0.00465046	CEL, OSBPL5, SOAT2, MSR1, ABCG5, CD36, APOE, LCAT, LIPC, APOM, ABCG1	1458	37	13528	2.75846	1	0.182165	8.29107
GOTERM_BP_FAT	GO:0015918~sterol transport	11	0.585729	0.00465046	CEL, OSBPL5, SOAT2, MSR1, ABCG5, CD36, APOE, LCAT, LIPC, APOM, ABCG1	1458	37	13528	2.75846	1	0.182165	8.29107
GOTERM_BP_FAT	GO:0009628~response to abiotic stimulus	57	3.03514	0.00475956	XRCC2, APOBEC1, TACR3, C20ORF54, RRH, GJA1, RPS6KB1, CHRNA9, GRIN2B, TRPV4, LTB, TUBB3, LTA, CRYAB, MGP, SAG, CCND1, HSPB6, MAPK8, IL12B, HSPB3, CLOCK, CCL2, DRD3, DRD5, PRKDC, KMO, CABP4, BRSK1, BDKRB2, ABCA4, OBFC2A, TIMP3, HSPA1L, PDE6C, PDE1B, AGT, BCL2, NPFFR2, IVL, OTOP1, BMP4, GUCA1A, NOX3, TGFBR2, GRIN1, WRN, BRCA1, FOXP2, ATXN1, RNF8, OBFC2B, CDKN1A, ABCG5, P2RX3, AVPR1A, RHO	1458	368	13528	1.43715	1	0.18422	8.47755
GOTERM_BP_FAT	GO:0051336~regulation of hydrolase activity	53	2.82215	0.00479958	CCKAR, JUB, RAB3GAP1, MYBPC3, TNFSF15, EDNRB, EVI5, LTB4R, IFNG, APOA5, ALS2CR12, PLA2G1B, APOH, MS4A2, BIRC8, C5AR1, ARHGAP27, HBXIP, NTSR2, GRM5, TNNT3, PLCE1, F2, C9, TBC1D8, DRD5, MGMT, ALDOB, CDH1, FKBP1A, SFN, POT1, P2RY6, HRH1, RASGRP3, AGT, TBC1D7, ANGPTL3, COL4A3, MSH3, MAP2K1, TBC1D10B, WRN, SIRT1, A2ML1, BBC3, SYDE1, AVPR1A, RGS9, TBC1D21, NMBR, SELE, HTR2A	1458	337	13528	1.45922	1	0.183838	8.54586
GOTERM_BP_FAT	GO:0031424~keratinization	12	0.638978	0.00483507	LCE4A, EVPL, LCE1F, SPRR2D, SPRR2A, TGM1, SPRR3, LCE2B, LCE1B, SPRR2E, LCE3E, IVL	1458	43	13528	2.58934	1	0.183309	8.60639
GOTERM_BP_FAT	GO:0009617~response to bacterium	34	1.81044	0.00486336	LALBA, CCL2, DEFB106A, IL27RA, DEFB125, DEFB129, RPS6KB1, TLR6, CCL5, HTN3, CHIT1, TNFRSF1A, HIST1H2BI, PGLYRP2, IFNG, DEFB118, LTF, PARG, LBP, DEFB1, LTA, THPO, SPACA3, PLD1, IL6, ATP4B, DEFB103A, BPI, LYST, DEFA5, PLCG2, SELE, PTAFR, DMBT1	1458	193	13528	1.63455	1	0.182545	8.65462
GOTERM_BP_FAT	GO:0002673~regulation of acute inflammatory response	8	0.425985	0.00493571	FCER1A, F12, A2M, IL6, MASP1, OSMR, LBP, CCL5	1458	21	13528	3.53465	1	0.183278	8.77785
GOTERM_BP_FAT	GO:0007166~cell surface receptor linked signal transduction	234	12.4601	0.00509808	ADORA3, OSMR, GDF5, OR1E2, CTNNB1, GRIN2B, LTB4R, APOE, SOSTDC1, IFNG, GAB1, OR7C1, OR7C2, HTR1D, ROS1, HTR1E, GNG7, KLRB1, OR2S2, C5AR1, GPR133, LIFR, PDYN, OR1D2, SAG, CCR9, SSTR4, CCR8, MSX1, SSTR3, CCR3, LILRB3, MC2R, CX3CR1, F2, IL1R1, PRLHR, ENPP2, GAST, BDKRB2, OR1G1, ITGBL1, HCRTR1, CDA, FCER1A, GPR156, BMP4, MLN, SMAD9, OR2A4, TGFBR2, NOTCH2NL, CELSR2, SMAD2, GUCY2C, NOTCH2, OR12D2, CBLB…	1458	1856	13528	1.16981	1	0.186981	9.05384
GOTERM_BP_FAT	GO:0007599~hemostasis	22	1.17146	0.00515706	F11, F12, IL6, C9, ADAMTS13, DTNBP1, PLG, PROC, P2RY12, FGG, GP5, ANXA8, LPA, CD36, SAA2, SAA1, BLOC1S3, F2, APOH, GP1BA, TFPI2, ENTPD2	1458	108	13528	1.89006	1	0.187213	9.15391
GOTERM_BP_FAT	GO:0007601~visual perception	37	1.97018	0.00516975	KERA, LUM, RRH, POU6F2, RBP3, TH, CABP4, ABCA4, TIMP3, DTNBP1, CNGB3, NR2E1, KIFC3, CRYGC, PDE6C, CRB2, IMPG2, USH2A, SPATA7, CRYBB2, GUCA1A, OPA3, GLRB, CNNM4, GUCA1C, BFSP2, PCDH15, CRYZ, CNGA3, KCNV2, SAG, PROM1, RDH12, GRM8, RGS9, CRYBA1, RHO	1458	216	13528	1.58937	1	0.185939	9.17541
GOTERM_BP_FAT	GO:0050953~sensory perception of light stimulus	37	1.97018	0.00516975	KERA, LUM, RRH, POU6F2, RBP3, TH, CABP4, ABCA4, TIMP3, DTNBP1, CNGB3, NR2E1, KIFC3, CRYGC, PDE6C, CRB2, IMPG2, USH2A, SPATA7, CRYBB2, GUCA1A, OPA3, GLRB, CNNM4, GUCA1C, BFSP2, PCDH15, CRYZ, CNGA3, KCNV2, SAG, PROM1, RDH12, GRM8, RGS9, CRYBA1, RHO	1458	216	13528	1.58937	1	0.185939	9.17541
GOTERM_BP_FAT	GO:0030168~platelet activation	10	0.532481	0.00536063	P2RY12, FGG, IL6, SAA2, BLOC1S3, SAA1, ADAMTS13, F2, GP1BA, ENTPD2	1458	32	13528	2.89952	1	0.190407	9.49845
GOTERM_BP_FAT	GO:0007631~feeding behavior	16	0.85197	0.00588465	DMBX1, CCKAR, PRLHR, TH, GRIN1, LEP, GCG, HCRTR1, GRIN2B, AGT, GRM7, GALR2, CRH, MC4R, GHSR, ASIP	1458	69	13528	2.15153	1	0.205195	10.3797
GOTERM_BP_FAT	GO:0001934~positive regulation of protein amino acid phosphorylation	19	1.01171	0.00605206	BMP4, IL4, FCER1A, BMP10, IL6, IL5, HCLS1, ITLN1, IL31RA, EDNRB, CCND1, HPX, AGT, BCL2, F2, CD81, IFNG, LACRT, INSR	1458	89	13528	1.9808	1	0.208574	10.6595
GOTERM_BP_FAT	GO:0050727~regulation of inflammatory response	17	0.905218	0.00628479	FCER1A, F12, A2M, IL6, IL2RA, MASP1, OSMR, CCL5, TNFRSF1A, SAA2, SAA1, APOE, AGT, FABP4, LBP, GHSR, SELE	1458	76	13528	2.07545	1	0.213849	11.0471
GOTERM_BP_FAT	GO:0009967~positive regulation of signal transduction	47	2.50266	0.00635115	BMP10, FGF18, DRD3, SHOC2, GJA1, FGF10, FKBP1A, TLR6, GHRHR, SRC, IL31RA, CTNNB1, TNFRSF1A, ACVR1B, ECE1, AGT, IFNG, CASP8, LBP, NENF, CASP1, PRL, INSR, LTB, LTA, FCER1A, IL4, BMP4, IL6, IL5, HCLS1, KLK5, ESR1, FGF21, LGALS9, LEP, APOL3, NOTCH2, CDH13, EREG, HPX, RIPK1, P2RX3, TMOD2, ZRANB1, RELN, GHSR	1458	295	13528	1.47826	1	0.214032	11.1573
GOTERM_BP_FAT	GO:0050900~leukocyte migration	14	0.745474	0.0065815	IL6, CCL2, ROCK1, PODXL, CCL5, VCAM1, EDNRB, DOCK2, SAA2, SAA1, LYST, IFNG, PLA2G1B, SELE	1458	57	13528	2.27892	1	0.219053	11.539
GOTERM_BP_FAT	GO:0001709~cell fate determination	10	0.532481	0.00668037	BMP4, NOTCH2, HOXA2, NTF3, POU6F2, MYEF2, DSCAML1, TRIM15, IFRD1, CTNNB1	1458	33	13528	2.81166	1	0.220131	11.7023
GOTERM_BP_FAT	GO:0008277~regulation of G-protein coupled receptor protein signaling pathway	13	0.692226	0.00683974	RAMP3, DRD3, KLK5, RPH3AL, RIC8B, RGS13, PLCE1, ECE1, RGS3, GPSM1, TMOD2, RGS9, GNG7	1458	51	13528	2.3651	1	0.222929	11.965
GOTERM_BP_FAT	GO:0042327~positive regulation of phosphorylation	20	1.06496	0.00698263	BMP4, IL4, FCER1A, BMP10, IL6, IL5, HCLS1, ITLN1, IL31RA, EDNRB, CCND1, EREG, HPX, AGT, BCL2, F2, CD81, IFNG, LACRT, INSR	1458	97	13528	1.91309	1	0.225199	12.1999
GOTERM_BP_FAT	GO:0045471~response to ethanol	15	0.798722	0.00723032	CCL2, APOBEC1, DRD3, GNRH1, GRIN1, TH, RPS6KB1, UGT1A1, TNFRSF1A, UGT1A10, CCND1, GRIN2B, APOE, BCL2, INSR, LCT	1458	64	13528	2.17464	1	0.230359	12.6056
GOTERM_BP_FAT	GO:0042060~wound healing	33	1.75719	0.00745422	JUB, FGF7, C9, ADAMTS13, DRD5, FGF10, TIMP3, DTNBP1, ANXA8, GP5, FGG, LPA, SAA2, BLOC1S3, SAA1, APOA5, APOH, GP1BA, TFPI2, ENTPD2, F11, F12, IL6, TGFBR2, PLG, PROC, P2RY12, NOTCH2, CD36, EREG, F2, SERPINB2, SPRR3	1458	191	13528	1.60309	1	0.234738	12.9709
GOTERM_BP_FAT	GO:0008285~negative regulation of cell proliferation	55	2.92865	0.00779694	RARRES1, IL28RA, RBM5, TNFSF15, BAP1, GJA1, FGF10, AZGP1, CTTNBP2, APOE, IFNG, APOH, IFNK, LTB, LTA, RB1, SSTR4, SSTR3, MSX1, EREG, CD33, IL12B, CER1, FRK, NDN, STK11, UMOD, SFN, BDKRB2, POU1F1, CCL23, AGT, BCL2, GML, B4GALT7, FGFBP1, RUNX3, PINX1, BMP4, COL4A3, TESC, IL6, IL2RA, GNRH1, FLT3, TGFBR2, SMAD2, PLG, NOTCH2, CDH13, CBLB, CDKN1A, CUL4A, ATP5A1, TOB1	1458	361	13528	1.41362	1	0.242239	13.5272
GOTERM_BP_FAT	GO:0006941~striated muscle contraction	12	0.638978	0.00830819	TNNT3, MYH1, MYBPC3, PGAM2, MYH7, RPS6KB1, MYOM1, TTN, CHRNA1, KBTBD10, CASQ2, ARHGEF11	1458	46	13528	2.42047	1	0.254004	14.3507
GOTERM_BP_FAT	GO:0043269~regulation of ion transport	20	1.06496	0.00871779	JPH4, ATP4A, DRD3, SLC9A3, GJA1, FKBP1A, P2RY12, GCK, PLN, BCL2, P2RX3, F2, PLCG2, LACRT, CATSPER1, PLA2G1B, MS4A2, LTB, LTA, HTR2A	1458	99	13528	1.87444	1	0.262764	15.0052
GOTERM_BP_FAT	GO:0050820~positive regulation of coagulation	6	0.319489	0.0088264	F12, SERPINF2, F2, APOH, HRG, PLG	1458	13	13528	4.28237	1	0.263597	15.178
GOTERM_BP_FAT	GO:0034612~response to tumor necrosis factor	6	0.319489	0.0088264	RIPK1, ENDOG, CASP8, CCL5, SELE, INSR	1458	13	13528	4.28237	1	0.263597	15.178
GOTERM_BP_FAT	GO:0045937~positive regulation of phosphate metabolic process	20	1.06496	0.00970704	BMP4, IL4, FCER1A, BMP10, IL6, IL5, HCLS1, ITLN1, IL31RA, EDNRB, CCND1, EREG, HPX, AGT, BCL2, F2, CD81, IFNG, LACRT, INSR	1458	100	13528	1.85569	1	0.28377	16.5664
GOTERM_BP_FAT	GO:0010562~positive regulation of phosphorus metabolic process	20	1.06496	0.00970704	BMP4, IL4, FCER1A, BMP10, IL6, IL5, HCLS1, ITLN1, IL31RA, EDNRB, CCND1, EREG, HPX, AGT, BCL2, F2, CD81, IFNG, LACRT, INSR	1458	100	13528	1.85569	1	0.28377	16.5664
GOTERM_BP_FAT	GO:0031349~positive regulation of defense response	16	0.85197	0.0100392	FCER1A, IL6, OSMR, KLRK1, TLR6, CCL5, IL21, POLR3D, TNFRSF1A, EREG, AGT, FABP4, IFNK, LBP, IL12B, CLEC7A	1458	73	13528	2.03364	1	0.289852	17.0846
GOTERM_BP_FAT	GO:0042537~benzene and derivative metabolic process	4	0.212993	0.0105459	UGT1A10, KYNU, CYP2F1, CYP1A2, UGT1A1	1458	5	13528	7.42277	1	0.299947	17.8689
GOTERM_BP_FAT	GO:0034370~triglyceride-rich lipoprotein particle remodeling	5	0.266241	0.0108176	LPL, APOE, LCAT, APOA5, LIPC	1458	9	13528	5.1547	1	0.30425	18.2868
GOTERM_BP_FAT	GO:0030855~epithelial cell differentiation	25	1.3312	0.0111013	EHF, LCE1B, SFN, SPRR2E, SPINK5, SPRR2D, UPK1A, AGT, SPRR2A, TGM1, POU3F1, IVL, LCE4A, MAP2K1, FOXN1, LCE2B, SCEL, EVPL, EREG, LCE1F, FLG, DLX5, SPRR3, LCE3E, DMBT1	1458	137	13528	1.69315	1	0.308733	18.7208
GOTERM_BP_FAT	GO:0048584~positive regulation of response to stimulus	38	2.02343	0.0123008	C9, MASP1, IL27RA, OSMR, MASP2, C5, KLRK1, FGF10, TLR6, CCL5, SRC, TNFRSF1A, FCN2, CD46, AGT, PLA2G1B, IFNK, LBP, CFHR5, FCER1A, IL6, C4BPA, IL21, BRCA1, POLR3D, RNF8, C8A, C1QB, CDH13, LAT2, EREG, HPX, PLCG2, CRH, FABP4, IL12B, CLEC7A, GHSR	1458	236	13528	1.49399	1	0.333682	20.532
GOTERM_BP_FAT	GO:0007263~nitric oxide mediated signal transduction	6	0.319489	0.0125304	CD36, APOE, AGT, FPR1, DDAH2, DDAH1	1458	14	13528	3.97648	1	0.336498	20.8743
GOTERM_BP_FAT	GO:0009914~hormone transport	12	0.638978	0.0134585	LEP, IL6, TBX3, LTBP4, MC4R, TRPV4, SMAD2, GHSR, SLC30A8, GHRHR, SMPD3, CRYM	1458	49	13528	2.27228	1	0.354179	22.2439
GOTERM_BP_FAT	GO:0002684~positive regulation of immune system process	38	2.02343	0.0139667	C9, IL27RA, MASP1, MASP2, C5, KLRK1, TLR6, VCAM1, BLOC1S3, FCN2, CD46, IFNG, PLA2G1B, MS4A2, IFNK, LBP, CFHR5, CD28, FCER1A, IL4, SPACA3, IL6, IL2RA, IL5, TGFBR2, C4BPA, IL21, POLR3D, C8A, C1QB, CDKN1A, CBLB, LAT2, EREG, HPX, PLCG2, IL12B, CLEC7A	1458	238	13528	1.48144	1	0.362499	22.9842
GOTERM_BP_FAT	GO:0051606~detection of stimulus	22	1.17146	0.0141571	RTP3, NOX3, GUCA1A, RRH, CABP4, ABCA4, ABCG1, SAG, KCNMB2, PDE6C, GCK, CHRNA9, GRIN2B, PGLYRP2, NPFFR2, PARG, UGT2A1, CLEC7A, LBP, PARP1, OTOP1, RHO	1458	118	13528	1.72988	1	0.36411	23.2599
GOTERM_BP_FAT	GO:0051050~positive regulation of transport	36	1.91693	0.0143655	ITLN1, TNFSF15, FGF10, CDH1, GHRHR, SAA2, GRIN2B, APOE, SAA1, APOA5, IFNG, PLA2G1B, MS4A2, CASP1, LTB, INSR, LTA, FCER1A, BMP4, SPACA3, IL6, FGF21, PFKM, P2RY12, INHBA, KCNN4, UCN3, GCK, P2RX3, LACRT, F2, PLCG2, CRH, AVPR1A, CLEC7A, SELE	1458	223	13528	1.49787	1	0.366056	23.5605
GOTERM_BP_FAT	GO:0030595~leukocyte chemotaxis	10	0.532481	0.0145628	EDNRB, DOCK2, IL6, CCL2, SAA2, SAA1, LYST, IFNG, PLA2G1B, CCL5	1458	37	13528	2.50769	1	0.367745	23.8441
GOTERM_BP_FAT	GO:0042509~regulation of tyrosine phosphorylation of STAT protein	9	0.479233	0.0145797	IL4, IL6, HPX, HCLS1, PPP2CA, IFNG, IL22, IL31RA, IL22RA2	1458	31	13528	2.69375	1	0.365813	23.8683
GOTERM_BP_FAT	GO:0008284~positive regulation of cell proliferation	60	3.19489	0.014667	BMP10, FGF18, FGF7, OSMR, FGF10, RPS6KB1, DDR2, NR2E1, GHRHR, IL31RA, FXN, IFNG, PLA2G1B, FGF1, PRL, INSR, EGR4, LIFR, IL21, HOXC10, CCND1, EREG, PROK1, LACRT, CD81, IL12B, CCL2, DRD3, TBC1D8, CTF1, VCAM1, HOXA3, REG1A, BLOC1S2, BCL2, AGT, PTN, TLX1, CD28, THPO, BMP4, IL4, KLF5, IL6, IL2RA, IL5, TBX3, FLT3, HCLS1, TGFBR2, RPS9, CCL15, FOXP2, CDH13, CDKN1A, DLX5, AVPR1A, FABP4, MAB21L2, HTR2A	1458	414	13528	1.3447	1	0.365304	23.9935
GOTERM_BP_FAT	GO:0002252~immune effector process	24	1.27796	0.0160546	IL6, C9, APOBEC1, MASP1, MSH3, MASP2, C5, MLH1, PRKDC, RAG2, C4BPA, CTNNBL1, C8A, C1QB, ABCC9, LAT2, FCN2, CD46, BCL2, LYST, PLA2G1B, LBP, CFHR5, GNL1	1458	134	13528	1.66181	1	0.389903	25.9566
GOTERM_BP_FAT	GO:0048753~pigment granule organization	5	0.266241	0.0165108	BLOC1S2, BLOC1S3, LYST, BCL2, ASIP	1458	10	13528	4.63923	1	0.396141	26.5914
GOTERM_BP_FAT	GO:0001662~behavioral fear response	6	0.319489	0.0171587	GRIN2B, GRM7, BCL2, GABRA5, NEUROD2, GNG7	1458	15	13528	3.71139	1	0.405723	27.4842
GOTERM_BP_FAT	GO:0002209~behavioral defense response	6	0.319489	0.0171587	GRIN2B, GRM7, BCL2, GABRA5, NEUROD2, GNG7	1458	15	13528	3.71139	1	0.405723	27.4842
GOTERM_BP_FAT	GO:0046427~positive regulation of JAK-STAT cascade	8	0.425985	0.0173184	IL4, IL6, IL5, HPX, HCLS1, IFNG, PRL, IL31RA	1458	26	13528	2.85491	1	0.406279	27.7027
GOTERM_BP_FAT	GO:0010647~positive regulation of cell communication	49	2.60916	0.0178337	BMP10, FGF18, GJA1, SHOC2, FGF10, TLR6, GHRHR, CTNNB1, IL31RA, ACVR1B, CASP8, IFNG, LBP, CASP1, PRL, LTB, INSR, LTA, ESR1, FGF21, EREG, RIPK1, RELN, CCL2, DRD3, FKBP1A, SRC, TNFRSF1A, ECE1, AGT, NENF, FCER1A, BMP4, IL4, IL6, IL5, HCLS1, KLK5, LGALS9, LEP, NOTCH2, APOL3, CDH13, GRIA2, HPX, P2RX3, TMOD2, ZRANB1, GHSR	1458	329	13528	1.3819	1	0.413153	28.4034
GOTERM_BP_FAT	GO:0016042~lipid catabolic process	29	1.5442	0.0182265	PLCZ1, ENPP2, EHHADH, AZGP1, ACOT8, APOE, APOA5, PLA2G12B, PLA2G1B, PLA1A, BDH2, ANGPTL3, LPL, PLD1, PNLIPRP2, ACOXL, LEP, HAO1, CEL, PLCE1, PLCG2, LIPH, PLA2G2E, LIPC, PLA2G2D, AKR1D1, LIPE, SMPD3, LIPF	1458	173	13528	1.55535	1	0.417719	28.9331
GOTERM_BP_FAT	GO:0001932~regulation of protein amino acid phosphorylation	29	1.5442	0.0182265	BMP10, ITLN1, FKBP1A, BDKRB2, TLR6, IL31RA, EDNRB, MAP3K5, AGT, BCL2, PPP2CA, GAB1, IFNG, INSR, IL4, BMP4, FCER1A, IL6, IL5, HCLS1, IL22, TP73, CCND1, HPX, RIPK1, F2, CD81, LACRT, IL22RA2	1458	173	13528	1.55535	1	0.417719	28.9331
GOTERM_BP_FAT	GO:0046879~hormone secretion	11	0.585729	0.0193123	LEP, IL6, TBX3, LTBP4, MC4R, TRPV4, SMAD2, GHSR, SLC30A8, GHRHR, SMPD3	1458	45	13528	2.26807	1	0.433977	30.3785
GOTERM_BP_FAT	GO:0051918~negative regulation of fibrinolysis	4	0.212993	0.019411	SERPINF2, APOH, HRG, PLG	1458	6	13528	6.18564	1	0.433275	30.5084
GOTERM_BP_FAT	GO:0030072~peptide hormone secretion	10	0.532481	0.0204138	LEP, IL6, LTBP4, MC4R, TRPV4, SMAD2, GHSR, SLC30A8, GHRHR, SMPD3	1458	39	13528	2.37909	1	0.447441	31.8162
GOTERM_BP_FAT	GO:0060326~cell chemotaxis	10	0.532481	0.0204138	EDNRB, DOCK2, IL6, CCL2, SAA2, SAA1, LYST, IFNG, PLA2G1B, CCL5	1458	39	13528	2.37909	1	0.447441	31.8162
GOTERM_BP_FAT	GO:0007200~activation of phospholipase C activity by G-protein coupled receptor protein signaling pathway coupled to IP3 second messenger	12	0.638978	0.0207207	GRM5, CCKAR, EDNRB, P2RY6, HRH1, PLCE1, LTB4R, AGT, DRD5, NMBR, NTSR2, HTR2A	1458	52	13528	2.14118	1	0.450021	32.2118
GOTERM_BP_FAT	GO:0032504~multicellular organism reproduction	68	3.62087	0.0207481	RAD51C, FGF7, SMCP, GMCL1L, PGAM2, MLH1, RPS6KB1, PTTG2, TBP, GHRHR, PRKACG, CTTNBP2, ZNF148, RPL39L, OR7C1, PRL, SEMG1, MORC1, FSHR, NME5, INHBA, TXNDC2, EREG, CATSPER3, SPATA19, CATSPER1, DLD, TESK1, DMC1, XDH, CCL2, DRD5, HK2, ACSBG2, PRKDC, PAQR7, CLDN11, SYCP1, PAQR5, DUSP13, BCL2, AGT, PDILT, DEFB118, SPATA3, PPP2R2B, SPATA6, SPATA5, PPAP2B, SPATA7, BMP4, GNRH1, MAK, GRIN1, TNP1, CELSR2, SI…	1458	487	13528	1.29556	1	0.448105	32.247
GOTERM_BP_FAT	GO:0048609~reproductive process in a multicellular organism	68	3.62087	0.0207481	RAD51C, FGF7, SMCP, GMCL1L, PGAM2, MLH1, RPS6KB1, PTTG2, TBP, GHRHR, PRKACG, CTTNBP2, ZNF148, RPL39L, OR7C1, PRL, SEMG1, MORC1, FSHR, NME5, INHBA, TXNDC2, EREG, CATSPER3, SPATA19, CATSPER1, DLD, TESK1, DMC1, XDH, CCL2, DRD5, HK2, ACSBG2, PRKDC, PAQR7, CLDN11, SYCP1, PAQR5, DUSP13, BCL2, AGT, PDILT, DEFB118, SPATA3, PPP2R2B, SPATA6, SPATA5, PPAP2B, SPATA7, BMP4, GNRH1, MAK, GRIN1, TNP1, CELSR2, SI…	1458	487	13528	1.29556	1	0.448105	32.247
GOTERM_BP_FAT	GO:0045639~positive regulation of myeloid cell differentiation	9	0.479233	0.0211638	LEP, INHBA, TAL1, ACVR1B, TESC, IL5, GNAS, RB1, CCL5	1458	33	13528	2.53049	1	0.452358	32.779
GOTERM_BP_FAT	GO:0050778~positive regulation of immune response	25	1.3312	0.0213729	C9, MASP1, IL27RA, MASP2, C5, KLRK1, TLR6, CD46, FCN2, PLA2G1B, LBP, IFNK, CFHR5, FCER1A, C4BPA, IL21, POLR3D, C8A, C1QB, LAT2, EREG, HPX, PLCG2, CLEC7A, IL12B	1458	145	13528	1.59974	1	0.453304	33.0451
GOTERM_BP_FAT	GO:0034754~cellular hormone metabolic process	13	0.692226	0.0216541	HSD3B1, HSD17B1, CYP11B2, CRABP2, UGT1A1, RDH12, UGT1A10, AFP, CYP17A1, AKR1C4, ECE1, SERPINA6, CRH, AKR1D1	1458	59	13528	2.04441	1	0.455353	33.4014
GOTERM_BP_FAT	GO:0044057~regulation of system process	46	2.44941	0.0218698	CPLX4, SRI, PPFIA3, BMP10, ADORA3, CCL2, TACR3, DRD3, DRD5, MYBPC3, TH, RPS6KB1, BDKRB2, KCNMB2, EDNRB, ECE1, GRIN2B, C11ORF9, APOE, AGT, IFNG, KCNE2, CNN1, HCN4, KCNQ1, LTB, LTA, MAP2K1, NTF3, GRIN1, MYH7, GRM1, LEP, INHBA, TNNT3, PLCE1, ABCG5, GRIA2, GRM8, P2RX3, PLN, CRH, AVPR1A, CNTN4, GHSR, HTR2A	1458	309	13528	1.38126	1	0.456364	33.6735
GOTERM_BP_FAT	GO:0016052~carbohydrate catabolic process	20	1.06496	0.0232157	OVGP1, SPACA3, FUT8, FUT6, OGDHL, ALDOB, HK2, HK1, PGAM2, PFKM, HYAL4, CHIT1, G6PC, GCK, HK3, PGLYRP2, MGAM, PDHA2, FUT2, EDARADD	1458	109	13528	1.70247	1	0.474268	35.3479
GOTERM_BP_FAT	GO:0006898~receptor-mediated endocytosis	12	0.638978	0.0236852	RAMP3, MRC1, MSR1, PICALM, GRIA2, DRD3, APOE, FOLR1, SLC9A3, TGFBR2, ARHGAP27, DNM1	1458	53	13528	2.10078	1	0.478804	35.9224
GOTERM_BP_FAT	GO:0048015~phosphoinositide-mediated signaling	17	0.905218	0.0247034	CCKAR, PIK3C2A, DRD5, NTSR2, GRM5, EDNRB, P2RY6, PLCE1, HRH1, CA8, LTB4R, AGT, LACRT, HIST1H4F, NMBR, PTAFR, HTR2A	1458	88	13528	1.79243	1	0.491031	37.1519
GOTERM_BP_FAT	GO:0060341~regulation of cellular localization	38	2.02343	0.0252449	CPLX4, DRD3, MYBPC3, TNFSF15, CDH1, GHRHR, GRIN2B, SAA2, SAA1, AGT, IFNG, PLA2G1B, MS4A2, TRPV6, CASP1, KCNQ1, NSF, FCER1A, BMP4, IL6, CRYAB, RPH3AL, PFKM, SIRT1, LEP, GCG, INHBA, KCNN4, UCN3, GCK, GRM8, GRM7, LACRT, CRH, AVPR1A, GHSR, MBTPS1, HTR2A	1458	248	13528	1.4217	1	0.496262	37.7967
GOTERM_BP_FAT	GO:0050731~positive regulation of peptidyl-tyrosine phosphorylation	11	0.585729	0.0257614	FCER1A, IL4, IL6, IL5, HPX, HCLS1, AGT, LACRT, IFNG, CD81, IL31RA	1458	47	13528	2.17156	1	0.501033	38.4059
GOTERM_BP_FAT	GO:0010627~regulation of protein kinase cascade	38	2.02343	0.0266832	DRD3, GJA1, FKBP1A, TLR6, CTNNB1, IL31RA, TNFRSF1A, MAP3K5, GRIN2B, AGT, PPP2CA, GAB1, IFNG, CASP8, NENF, CASP1, PRL, LTB, INSR, LTA, FCER1A, IL4, IL6, IL5, IL1RL1, HCLS1, FGF21, IL22, GRM1, LGALS9, TP73, GPS2, LEP, AMBP, APOL3, HPX, RIPK1, IL22RA2	1458	249	13528	1.41599	1	0.511115	39.479
GOTERM_BP_FAT	GO:0015833~peptide transport	12	0.638978	0.026947	LEP, IL6, SLC15A2, LTBP4, TAP1, MC4R, TRPV4, SMAD2, GHSR, SLC30A8, GHRHR, SMPD3	1458	54	13528	2.06188	1	0.51228	39.7828
GOTERM_BP_FAT	GO:0051046~regulation of secretion	32	1.70394	0.0269766	CPLX4, DRD3, TNFSF15, GHRHR, GRIN2B, SAA2, SAA1, AGT, IFNG, PLA2G1B, MS4A2, TRPV6, CASP1, KCNQ1, NSF, FCER1A, IL6, RPH3AL, PFKM, LEP, GCG, INHBA, KCNN4, UCN3, GCK, GRM8, GRM7, LACRT, CRH, AVPR1A, GHSR, HTR2A	1458	202	13528	1.46986	1	0.51036	39.8169
GOTERM_BP_FAT	GO:0002790~peptide secretion	10	0.532481	0.0277915	LEP, IL6, LTBP4, MC4R, TRPV4, SMAD2, GHSR, SLC30A8, GHRHR, SMPD3	1458	41	13528	2.26304	1	0.518646	40.7459
GOTERM_BP_FAT	GO:0050730~regulation of peptidyl-tyrosine phosphorylation	14	0.745474	0.0278951	IL4, FCER1A, IL6, IL5, HCLS1, IL22, IL31RA, HPX, PPP2CA, AGT, CD81, IFNG, LACRT, IL22RA2	1458	68	13528	1.91027	1	0.517681	40.863
GOTERM_BP_FAT	GO:0051241~negative regulation of multicellular organismal process	27	1.4377	0.0281788	BMP10, DRD5, TSPAN8, TNFRSF11B, FXN, APOE, IFNG, APOH, GP1BA, LBP, F11, F12, IL6, TGFBR2, MEPE, ANXA4, PLG, PROC, INHBA, BPI, ABCG5, PLN, F2, CRH, AVPR1A, GHSR, HTR2A	1458	164	13528	1.52755	1	0.519016	41.1827
GOTERM_BP_FAT	GO:0046131~pyrimidine ribonucleoside metabolic process	6	0.319489	0.0294959	NME4, NME5, CTPS, CDA, UPP2, ENTPD4	1458	17	13528	3.27475	1	0.533143	42.6453
GOTERM_BP_FAT	GO:0008306~associative learning	6	0.319489	0.0294959	GRIN2B, GRM7, DRD5, GRIN1, GABRA5, NEUROD2	1458	17	13528	3.27475	1	0.533143	42.6453
GOTERM_BP_FAT	GO:0016485~protein processing	20	1.06496	0.0299892	F11, F12, C9, MASP1, CORIN, ADAMTS13, MASP2, C5, C4BPA, C8A, C1QB, ECE1, FXN, FCN2, CD46, APOH, CFHR5, PCSK6, PARP1, CASP1	1458	112	13528	1.65687	1	0.536864	43.1842
GOTERM_BP_FAT	GO:0008037~cell recognition	12	0.638978	0.0305205	DOCK2, ZP2, OPCML, NDN, DYNLL2, SMCP, ZP3, CNTNAP3, CNTN4, CLEC7A, SPAM1, TNP2	1458	55	13528	2.02439	1	0.540964	43.7592
GOTERM_BP_FAT	GO:0044242~cellular lipid catabolic process	15	0.798722	0.0309054	LPL, PLD1, ACOXL, EHHADH, HAO1, LEP, CEL, ACOT8, PLCG2, APOA5, BDH2, ANGPTL3, LIPC, LIPE, SMPD3	1458	76	13528	1.83128	1	0.543261	44.1724
GOTERM_BP_FAT	GO:0046545~development of primary female sexual characteristics	14	0.745474	0.031104	BMP4, FGF7, TBX3, SIRT1, FSHR, CDH6, LEP, INHBA, AFP, EREG, BCL2, AGT, DMC1, LHX9	1458	69	13528	1.88259	1	0.543346	44.3845
GOTERM_BP_FAT	GO:0046660~female sex differentiation	14	0.745474	0.031104	BMP4, FGF7, TBX3, SIRT1, FSHR, CDH6, LEP, INHBA, AFP, EREG, BCL2, AGT, DMC1, LHX9	1458	69	13528	1.88259	1	0.543346	44.3845
GOTERM_BP_FAT	GO:0050886~endocrine process	7	0.372737	0.0312304	ECE1, TBX3, DRD3, AGT, DRD5, CYP11B2, AVPR1A	1458	23	13528	2.82388	1	0.54259	44.519
GOTERM_BP_FAT	GO:0034372~very-low-density lipoprotein particle remodeling	4	0.212993	0.0312788	LPL, APOE, LCAT, LIPC	1458	7	13528	5.30198	1	0.540939	44.5705
GOTERM_BP_FAT	GO:0051240~positive regulation of multicellular organismal process	37	1.97018	0.0313297	BMP10, CCL2, TACR3, IL27RA, KLRK1, CCL5, GHRHR, SAA2, C11ORF9, SAA1, BCL2, AGT, IFNG, GATA4, APOH, HRG, LBP, CASP1, LTB, LTA, BMP4, F12, IL6, IL21, PLG, POLR3D, EREG, GRIA2, SERPINF2, F2, CRH, MC4R, AVPR1A, IL12B, CLEC7A, GHSR, HTR2A	1458	244	13528	1.40698	1	0.53933	44.6245
GOTERM_BP_FAT	GO:0006956~complement activation	10	0.532481	0.0321065	C8A, C1QB, C9, MASP1, MASP2, FCN2, CD46, C5, C4BPA, CFHR5	1458	42	13528	2.20916	1	0.546048	45.4433
GOTERM_BP_FAT	GO:0034375~high-density lipoprotein particle remodeling	5	0.266241	0.0326779	APOE, LCAT, LIPC, APOM, ABCG1	1458	12	13528	3.86603	1	0.550303	46.0382
GOTERM_BP_FAT	GO:0002675~positive regulation of acute inflammatory response	5	0.266241	0.0326779	FCER1A, IL6, OSMR, LBP, CCL5	1458	12	13528	3.86603	1	0.550303	46.0382
GOTERM_BP_FAT	GO:0007167~enzyme linked receptor protein signaling pathway	49	2.60916	0.0329691	BMP10, FGF18, MTSS1, MPZL1, FGF7, NDST1, GDF5, SHOC2, FGF10, DDR2, IL31RA, ACVR1B, GAB1, FGF1, ROS1, INSR, GNG7, LIFR, PLCE1, MSX1, EREG, AKAP3, CER1, FMOD, WFIKKN2, CCL2, NDN, FUT8, CTF1, TIPARP, FKBP1A, BDKRB2, SRC, TEK, PTN, CSF1R, BMP4, AMHR2, PTPRD, SMAD9, LTK, FLT3, TGFBR2, SMAD2, GUCY2C, NTRK1, PDZD3, GRB7, TOB1	1458	342	13528	1.32937	1	0.551374	46.339
GOTERM_BP_FAT	GO:0009612~response to mechanical stimulus	12	0.638978	0.0344193	BMP4, CCL2, GRIN2B, CHRNA9, TGFBR2, MGP, TRPV4, RPS6KB1, TIMP3, LTB, LTA, FOXP2	1458	56	13528	1.98824	1	0.565011	47.8137
GOTERM_BP_FAT	GO:0032844~regulation of homeostatic process	20	1.06496	0.0352625	IL2RA, FKBP1A, CCL5, POT1, INHBA, ACVR1B, TAL1, TNFRSF11B, C11ORF9, AGT, BCL2, P2RX3, F2, IFNG, LACRT, PLA2G1B, AVPR1A, MC4R, MS4A2, XCR1	1458	114	13528	1.6278	1	0.571781	48.6534
GOTERM_BP_FAT	GO:0032940~secretion by cell	32	1.70394	0.0362913	CPLX4, SNAP29, PPFIA3, LTBP4, CCL8, TXLNA, CCL5, GHRHR, ANK1, BLOC1S3, SYN3, MS4A2, TRPV4, EXOC6, PCSK6, SLC30A8, FCER1A, IL6, GLRB, TBX3, RPH3AL, SCRN1, SMAD2, TNP2, LEP, LAT2, TRIM36, MC4R, GNAS, GHSR, AKAP3, SMPD3	1458	207	13528	1.43435	1	0.580276	49.6606
GOTERM_BP_FAT	GO:0051604~protein maturation	21	1.11821	0.0366237	F11, F12, C9, MASP1, CORIN, ADAMTS13, MASP2, C5, FKBP1A, C4BPA, C8A, C1QB, ECE1, FXN, FCN2, CD46, APOH, CFHR5, PCSK6, PARP1, CASP1	1458	122	13528	1.59711	1	0.581512	49.9821
GOTERM_BP_FAT	GO:0050729~positive regulation of inflammatory response	8	0.425985	0.036725	FCER1A, TNFRSF1A, IL6, OSMR, AGT, FABP4, LBP, CCL5	1458	30	13528	2.47426	1	0.5804	50.0797
GOTERM_BP_FAT	GO:0002541~activation of plasma proteins involved in acute inflammatory response	10	0.532481	0.0368645	C8A, C1QB, C9, MASP1, MASP2, FCN2, CD46, C5, C4BPA, CFHR5	1458	43	13528	2.15778	1	0.579683	50.2137
GOTERM_BP_FAT	GO:0048585~negative regulation of response to stimulus	18	0.958466	0.0379088	A2M, IL2RA, MASP1, DRD3, IL27RA, GRIN1, SPINK5, SIRT1, CTNNA2, GPS2, AMBP, LEP, AES, SAA2, APOE, SAA1, CRH, GHSR	1458	100	13528	1.67012	1	0.587956	51.2066
GOTERM_BP_FAT	GO:0008283~cell proliferation	60	3.19489	0.0381385	MORF4L1, BMP10, RETNLB, LMO1, OSMR, ELF5, FGF10, TXLNA, CTNNB1, REG3A, BLZF1, NDE1, EVI5, GAB1, MS4A2, PRL, PRG4, CD160, FOXN1, IFI16, ZFP37, TACC2, CDK3, CTNNBIP1, CHRM5, PLCE1, AMBN, UCN2, EREG, C2ORF29, CD81, PELO, BIN1, CTF1, EHF, FKBP1A, SFN, RAG2, SRC, TAL1, REG1B, DOCK2, BCL2, AGT, MAS1, LHX9, RUNX3, BUB3, ACSL6, CSF1R, THPO, FZD9, BMP4, COL4A3, IL2RA, MAP2K1, GCG, CDH13, S100B, IL5RA	1458	436	13528	1.27685	1	0.5881	51.4224
GOTERM_BP_FAT	GO:0009314~response to radiation	31	1.65069	0.0382091	XRCC2, APOBEC1, CCL2, DRD3, DRD5, RRH, PRKDC, CABP4, BRSK1, ABCA4, OBFC2A, PDE6C, PDE1B, BCL2, IVL, TUBB3, GUCA1A, GRIN1, WRN, BRCA1, SAG, RNF8, OBFC2B, ATXN1, CDKN1A, CCND1, ABCG5, MAPK8, IL12B, CLOCK, RHO	1458	200	13528	1.43816	1	0.586696	51.4886
GOTERM_BP_FAT	GO:0008585~female gonad development	13	0.692226	0.0386703	BMP4, FGF7, SIRT1, FSHR, CDH6, LEP, INHBA, AFP, EREG, BCL2, AGT, DMC1, LHX9	1458	64	13528	1.88469	1	0.589085	51.9187
GOTERM_BP_FAT	GO:0019722~calcium-mediated signaling	9	0.479233	0.0401302	LAT2, PLCE1, LACRT, AVPR1A, GPRC6A, SELE, GRM1, LTB, LTA	1458	37	13528	2.25692	1	0.600851	53.2565
GOTERM_BP_FAT	GO:0051605~protein maturation by peptide bond cleavage	16	0.85197	0.0403614	F11, F12, C9, MASP1, CORIN, MASP2, C5, C4BPA, C8A, C1QB, ECE1, FCN2, CD46, APOH, CFHR5, PCSK6	1458	86	13528	1.72623	1	0.600936	53.4651
GOTERM_BP_FAT	GO:0007156~homophilic cell adhesion	22	1.17146	0.0406341	PCDHB7, PCDH20, PCDHB1, PCDHGC5, DSCAML1, CDH1, CELSR2, PCDH15, PCDHB12, PCDHB11, CDH6, CDH13, CDH7, CDH15, CDH18, PVRL3, FAT2, DSG1, DSC1, PCDHA13, CDH26, CEACAM1	1458	131	13528	1.55822	1	0.601403	53.7101
GOTERM_BP_FAT	GO:0006140~regulation of nucleotide metabolic process	20	1.06496	0.0411896	GUCA1A, ADORA3, DRD3, DRD5, FSHR, GHRHR, EDNRB, CHRM5, UCN3, GRM8, OXER1, APOE, NTRK1, GRM7, GALR2, CDA, GNAS, CORT, GUCA2B, PDZD3	1458	116	13528	1.59974	1	0.604445	54.2052
GOTERM_BP_FAT	GO:0034097~response to cytokine stimulus	15	0.798722	0.0414294	IL1R1, KYNU, OSMR, LIFR, CCL5, SRC, CTNNB1, AES, BCL2, RIPK1, ENDOG, CASP8, XCR1, INSR, SELE	1458	79	13528	1.76173	1	0.604587	54.4174
GOTERM_BP_FAT	GO:0045165~cell fate commitment	23	1.22471	0.0416218	BMP4, NTF3, POU6F2, PTF1A, PRKDC, DSCAML1, MYEF2, FGF10, SMAD2, SOX6, TRIM15, RAG2, POU1F1, NR2E1, CTNNB1, HOXC10, NOTCH2, TAL1, HOXA2, BCL2, FGF1, IFRD1, TLX1	1458	139	13528	1.53529	1	0.604303	54.587
GOTERM_BP_FAT	GO:0051047~positive regulation of secretion	19	1.01171	0.0429232	FCER1A, IL6, TNFSF15, PFKM, GHRHR, INHBA, KCNN4, UCN3, GCK, GRIN2B, SAA2, SAA1, IFNG, LACRT, CRH, PLA2G1B, AVPR1A, MS4A2, CASP1	1458	109	13528	1.61735	1	0.613843	55.7184
GOTERM_BP_FAT	GO:0007584~response to nutrient	23	1.22471	0.0445606	BMP4, CCKAR, SOAT2, A2M, KYNU, CCL2, HSD17B2, TGFBR2, COX4I1, MGP, TSHB, RPS6KB1, TIMP3, UGT1A1, UGT1A10, TNFRSF11B, CCND1, ABCG5, BCL2, DDAH2, INSR, APOM, LCT, LTA	1458	140	13528	1.52432	1	0.625916	57.1042
GOTERM_BP_FAT	GO:0010941~regulation of cell death	104	5.53781	0.045716	XRCC2, GDF5, RBM5, TNFSF15, NR2E1, CIAPIN1, IL31RA, CTNNBL1, MAP3K5, APOE, IFNG, APOH, BIRC8, DDAH2, BCL2L14, BRAF, ROCK1, CRYAB, ACTN3, HBXIP, STK4, NME5, MSX1, SSTR3, LYST, F2, RIPK3, MAPK8, KALRN, PRODH, LALBA, CCL2, BDKRB2, TIMP3, SRC, PLAGL1, BLOC1S2, RUNX3, BMP4, NTF3, GNRH1, GRIN1, WRN, BRCA1, CIDEC, NOTCH2, CDKN1A, PSMC5, SFRP1, BBC3, NTRK1, PLCG2, MLH1, EDNRB, ACVR1B, BAG1, BAG3, CASP8, …	1458	815	13528	1.184	1	0.63356	58.0572
GOTERM_BP_FAT	GO:0019433~triglyceride catabolic process	4	0.212993	0.0461071	LPL, APOA5, LIPC, LIPE	1458	8	13528	4.63923	1	0.634785	58.3752
GOTERM_BP_FAT	GO:0070328~triglyceride homeostasis	4	0.212993	0.0461071	LPL, APOC4, APOA5, LIPC	1458	8	13528	4.63923	1	0.634785	58.3752
GOTERM_BP_FAT	GO:0033363~secretory granule organization	4	0.212993	0.0461071	BLOC1S2, BLOC1S3, LYST, DTNBP1	1458	8	13528	4.63923	1	0.634785	58.3752
GOTERM_BP_FAT	GO:0032026~response to magnesium ion	4	0.212993	0.0461071	CCND1, TNFRSF11B, PLCG2, CNGA3	1458	8	13528	4.63923	1	0.634785	58.3752
GOTERM_BP_FAT	GO:0042596~fear response	6	0.319489	0.0462992	GRIN2B, GRM7, BCL2, GABRA5, NEUROD2, GNG7	1458	19	13528	2.93004	1	0.634379	58.5306
GOTERM_BP_FAT	GO:0030808~regulation of nucleotide biosynthetic process	19	1.01171	0.0463655	GUCA1A, ADORA3, DRD3, DRD5, FSHR, GHRHR, EDNRB, CHRM5, UCN3, GRM8, OXER1, APOE, NTRK1, GRM7, GALR2, GNAS, CORT, GUCA2B, PDZD3	1458	110	13528	1.60264	1	0.632956	58.5841
GOTERM_BP_FAT	GO:0030802~regulation of cyclic nucleotide biosynthetic process	19	1.01171	0.0463655	GUCA1A, ADORA3, DRD3, DRD5, FSHR, GHRHR, EDNRB, CHRM5, UCN3, GRM8, OXER1, APOE, NTRK1, GRM7, GALR2, GNAS, CORT, GUCA2B, PDZD3	1458	110	13528	1.60264	1	0.632956	58.5841
GOTERM_BP_FAT	GO:0007204~elevation of cytosolic calcium ion concentration	19	1.01171	0.0463655	CCKAR, JPH4, C5AR1, FKBP1A, BDKRB2, CCR9, CCR8, EDNRB, PLCE1, SAA2, SAA1, CXCL13, CCR3, F2, GALR2, PLCG2, AVPR1A, TRPV4, XCR1	1458	110	13528	1.60264	1	0.632956	58.5841
GOTERM_BP_FAT	GO:0009991~response to extracellular stimulus	33	1.75719	0.0478341	CCKAR, KYNU, A2M, CCL2, HSD17B2, ALDOB, TSHB, RPS6KB1, TIMP3, KIAA0652, TNFRSF11B, AES, BCL2, DDAH2, APOM, INSR, LTA, BMP4, SOAT2, TGFBR2, COX4I1, MGP, SIRT1, UGT1A1, LEP, UGT1A10, CDKN1A, UCN3, CCND1, G6PC, ABCG5, AVPR1A, GHSR, LCT	1458	220	13528	1.39177	1	0.642756	59.7525
GOTERM_BP_FAT	GO:0044093~positive regulation of molecular function	77	4.10011	0.048183	CCKAR, ADORA3, MYBPC3, TNFSF15, TLR6, GHRHR, PRKACG, EDNRB, MAP3K5, FXN, APOE, LTB4R, GAB1, IFNG, APOA5, GALR2, APOH, PLA2G1B, MS4A2, PSMD4, BRD4, INSR, C5AR1, ANAPC4, ARHGAP27, GRM1, FSHR, NTSR2, JMY, GRM5, PLCE1, CCND1, UCN3, EREG, PROK1, RIPK1, F2, CD81, GNAS, RELN, ANAPC7, PRKD3, C9, DRD3, CALD1, DRD5, ALDOB, C5, FPR1, FKBP1A, POT1, HRH1, P2RY6, PSMB6, AGT, BCL2, PSMB2, FCER1A, IL4, COL4A3, I…	1458	586	13528	1.21918	1	0.643554	60.0254
GOTERM_BP_FAT	GO:0010959~regulation of metal ion transport	15	0.798722	0.0497187	JPH4, SLC9A3, GJA1, FKBP1A, GCK, BCL2, P2RX3, PLN, F2, PLCG2, LACRT, CATSPER1, PLA2G1B, MS4A2, HTR2A	1458	81	13528	1.71823	1	0.65345	61.2062
GOTERM_BP_FAT	GO:0007611~learning or memory	19	1.01171	0.0500004	FZD9, DRD3, DRD5, GRIN1, TH, GABRA5, RPS6KB1, FOXP2, ATXN1, PDE1B, GRIN2B, S100B, GRM7, GALR2, CRH, TMOD2, NEUROD2, PTN, HTR2A	1458	111	13528	1.58821	1	0.653661	61.4192
GOTERM_BP_FAT	GO:0031667~response to nutrient levels	30	1.59744	0.0504391	CCKAR, A2M, KYNU, CCL2, HSD17B2, ALDOB, TSHB, RPS6KB1, TIMP3, KIAA0652, TNFRSF11B, BCL2, DDAH2, APOM, INSR, LTA, BMP4, SOAT2, TGFBR2, COX4I1, MGP, SIRT1, UGT1A1, LEP, UGT1A10, UCN3, CCND1, G6PC, ABCG5, GHSR, LCT	1458	197	13528	1.41296	1	0.655046	61.7487
GOTERM_BP_FAT	GO:0006816~calcium ion transport	23	1.22471	0.0508855	SRI, PLCZ1, JPH4, CACNG6, GRIN1, CACNG5, SLC24A5, CACNG4, CCL8, FKBP1A, CACNG2, CACNA2D2, ATP2B1, CHRNA9, SLC24A4, GRIN2B, CATSPER3, PLN, F2, CATSPER1, TRPV4, TRPV6, XCR1	1458	142	13528	1.50285	1	0.656469	62.0812
GOTERM_BP_FAT	GO:0009581~detection of external stimulus	14	0.745474	0.0512142	NOX3, GUCA1A, RRH, CABP4, ABCA4, SAG, PDE6C, GRIN2B, CHRNA9, PGLYRP2, PARG, CLEC7A, OTOP1, RHO	1458	74	13528	1.75539	1	0.657007	62.3242
GOTERM_BP_FAT	GO:0051222~positive regulation of protein transport	13	0.692226	0.0525112	BMP4, IL6, TNFSF15, CDH1, KCNN4, SAA2, SAA1, IFNG, LACRT, PLA2G1B, CASP1, LTB, LTA	1458	67	13528	1.8003	1	0.664552	63.2692
GOTERM_BP_FAT	GO:0045137~development of primary sexual characteristics	21	1.11821	0.0525461	BMP4, FGF7, TBX3, SYCP2, FSHR, SIRT1, ANKRD7, GJB2, CDH6, LEP, PRKACG, AFP, INHBA, CCND1, TEX15, EREG, BCL2, AGT, BIK, DMC1, LHX9	1458	127	13528	1.53423	1	0.662937	63.2943
GOTERM_BP_FAT	GO:0033555~multicellular organismal response to stress	9	0.479233	0.0528744	EDNRB, GRIN2B, GRM7, P2RX3, BCL2, GABRA5, NEUROD2, RELN, GNG7	1458	39	13528	2.14118	1	0.663427	63.5297
GOTERM_BP_FAT	GO:0043067~regulation of programmed cell death	103	5.48456	0.0528899	XRCC2, GDF5, RBM5, TNFSF15, NR2E1, CIAPIN1, IL31RA, CTNNBL1, MAP3K5, APOE, IFNG, APOH, BIRC8, DDAH2, BCL2L14, BRAF, ROCK1, CRYAB, ACTN3, HBXIP, STK4, NME5, MSX1, SSTR3, LYST, F2, RIPK3, MAPK8, KALRN, PRODH, LALBA, CCL2, BDKRB2, TIMP3, SRC, PLAGL1, BLOC1S2, RUNX3, NTF3, GNRH1, GRIN1, WRN, BRCA1, CIDEC, NOTCH2, CDKN1A, PSMC5, SFRP1, BBC3, NTRK1, PLCG2, MLH1, EDNRB, ACVR1B, BAG1, BAG3, CASP8, CASP1,…	1458	812	13528	1.17695	1	0.661691	63.5408
GOTERM_BP_FAT	GO:0007612~learning	12	0.638978	0.0535084	ATXN1, GRIN2B, PDE1B, DRD3, GRM7, DRD5, TH, GRIN1, GABRA5, NEUROD2, PTN, FOXP2	1458	60	13528	1.85569	1	0.664233	63.9803
GOTERM_BP_FAT	GO:0010212~response to ionizing radiation	12	0.638978	0.0535084	RNF8, OBFC2B, CCND1, XRCC2, ABCG5, APOBEC1, CCL2, BCL2, PRKDC, BRSK1, OBFC2A, BRCA1	1458	60	13528	1.85569	1	0.664233	63.9803
GOTERM_BP_FAT	GO:0001816~cytokine production	10	0.532481	0.0539545	NFATC2IP, IL4, IL17F, NFAT5, PLA2G1B, FABP4, MS4A2, IL12B, PTAFR, CD28	1458	46	13528	2.01706	1	0.665534	64.2943
GOTERM_BP_FAT	GO:0045834~positive regulation of lipid metabolic process	10	0.532481	0.0539545	APOE, AGT, IFNG, APOA5, CD81, AVPR1A, GHSR, ANGPTL3, SEC14L2, ABCG1	1458	46	13528	2.01706	1	0.665534	64.2943
GOTERM_BP_FAT	GO:0000018~regulation of DNA recombination	7	0.372737	0.0540327	IL4, TEX15, IL27RA, MSH3, IFNG, MLH1, KPNA1	1458	26	13528	2.49805	1	0.664261	64.349
GOTERM_BP_FAT	GO:0007548~sex differentiation	24	1.27796	0.0548982	BMP4, AMHR2, FGF7, SMAD9, TBX3, SYCP2, FSHR, SIRT1, ANKRD7, CDH6, GJB2, LEP, PRKACG, AFP, INHBA, CYP17A1, CCND1, TEX15, EREG, BCL2, AGT, BIK, DMC1, LHX9	1458	151	13528	1.47472	1	0.668438	64.9498
GOTERM_BP_FAT	GO:0009651~response to salt stress	5	0.266241	0.0555778	TACR3, AGT, TRPV4, KMO, BDKRB2	1458	14	13528	3.31374	1	0.671272	65.4149
GOTERM_BP_FAT	GO:0030728~ovulation	5	0.266241	0.0555778	LEP, AFP, EREG, AGT, SIRT1	1458	14	13528	3.31374	1	0.671272	65.4149
GOTERM_BP_FAT	GO:0045940~positive regulation of steroid metabolic process	5	0.266241	0.0555778	APOE, AGT, IFNG, SEC14L2, ABCG1	1458	14	13528	3.31374	1	0.671272	65.4149
GOTERM_BP_FAT	GO:0045408~regulation of interleukin-6 biosynthetic process	5	0.266241	0.0555778	EREG, IL17F, IFNG, GHSR, TLR6	1458	14	13528	3.31374	1	0.671272	65.4149
GOTERM_BP_FAT	GO:0043627~response to estrogen stimulus	18	0.958466	0.0563502	BMP4, TACR3, CRYAB, TGFBR2, ESR1, TSHB, TIMP3, GHRHR, BRCA1, CTNNB1, SLC34A2, CTTNBP2, CCND1, TNFRSF11B, BCL2, RGS9, INSR, LCT	1458	105	13528	1.59059	1	0.674678	65.9363
GOTERM_BP_FAT	GO:0050830~defense response to Gram-positive bacterium	6	0.319489	0.0564499	PLD1, IL6, SPACA3, IL27RA, PGLYRP2, LBP	1458	20	13528	2.78354	1	0.673565	66.0031
GOTERM_BP_FAT	GO:0051385~response to mineralocorticoid stimulus	6	0.319489	0.0564499	CDKN1A, UCN3, CCND1, BCL2, AVPR1A, SRC	1458	20	13528	2.78354	1	0.673565	66.0031
GOTERM_BP_FAT	GO:0009988~cell-cell recognition	6	0.319489	0.0564499	DOCK2, ZP2, SMCP, ZP3, SPAM1, TNP2	1458	20	13528	2.78354	1	0.673565	66.0031
GOTERM_BP_FAT	GO:0001990~regulation of systemic arterial blood pressure by hormone	6	0.319489	0.0564499	ECE1, DRD3, AGT, DRD5, CYP11B2, AVPR1A	1458	20	13528	2.78354	1	0.673565	66.0031
GOTERM_BP_FAT	GO:0030799~regulation of cyclic nucleotide metabolic process	19	1.01171	0.0578654	GUCA1A, ADORA3, DRD3, DRD5, FSHR, GHRHR, EDNRB, CHRM5, UCN3, GRM8, OXER1, APOE, NTRK1, GRM7, GALR2, GNAS, CORT, GUCA2B, PDZD3	1458	113	13528	1.5601	1	0.681108	66.9377
GOTERM_BP_FAT	GO:0042692~muscle cell differentiation	20	1.06496	0.0591088	KCNH1, CAST, BMP4, BMP10, NTF3, MYEF2, FGF10, RB1, CACNG2, SOX6, TTN, CAPN2, PLG, CTNNB1, SMARCD3, AGT, AVPR1A, BIN1, CHRNA1, IFRD1	1458	121	13528	1.53363	1	0.68733	67.7386
GOTERM_BP_FAT	GO:0015674~di-, tri-valent inorganic cation transport	27	1.4377	0.0592461	SRI, PLCZ1, JPH4, CCL8, FKBP1A, SFXN1, ATP2B1, GRIN2B, SLC24A4, CHRNA9, LTF, TRPV4, TRPV6, XCR1, CACNG6, GRIN1, CACNG5, SLC24A5, GIF, CACNG4, CACNG2, CACNA2D2, CATSPER3, PLN, F2, CATSPER1, SLC25A37	1458	176	13528	1.4234	1	0.686456	67.8259
GOTERM_BP_FAT	GO:0051919~positive regulation of fibrinolysis	3	0.159744	0.0599823	F11, F12, PLG	1458	4	13528	6.95885	1	0.68935	68.2902
GOTERM_BP_FAT	GO:0045088~regulation of innate immune response	11	0.585729	0.0602223	A2M, EREG, HPX, KLRK1, IFNK, CLEC7A, LBP, IL12B, TLR6, IL21, POLR3D	1458	54	13528	1.89006	1	0.689121	68.4402
GOTERM_BP_FAT	GO:0007242~intracellular signaling cascade	153	8.14696	0.0604803	THOP1, TNFSF15, RRAD, RPS6KB1, TLR6, GHRHR, CTNNB1, IL31RA, PRKACG, MAP3K5, ARL11, LTB4R, APOE, IFNG, GAB1, GALR2, PLA2G1B, DDAH2, HTR1D, DDAH1, INSR, GNG7, HTR1E, EDARADD, IKBKAP, PLD1, C5AR1, ROCK1, BRAF, CRYAB, NTSR2, STK4, SSTR4, UCN3, PLCE1, LAT2, CD36, SSTR3, CCR3, RAB17, MC2R, F2, RIPK3, SDCBP, RAB15, MAPK8, AKAP7, ASB5, ASB4, KALRN, CCL2, DRD3, DRD5, ASB14, MYO9B, SRC, ASB17, P2RY6, CNR1,…	1458	1256	13528	1.13026	1	0.689006	68.6007
GOTERM_BP_FAT	GO:0006096~glycolysis	10	0.532481	0.0606319	GCK, HK3, ALDOB, OGDHL, HK2, HK1, PGAM2, PDHA2, PFKM, EDARADD	1458	47	13528	1.97414	1	0.688234	68.6946
GOTERM_BP_FAT	GO:0060249~anatomical structure homeostasis	18	0.958466	0.060676	XDH, FGF7, SMG6, PRKDC, WRN, PFKM, PLG, POT1, CTNNB1, HSPA1L, MUC3B, CTSK, TEX15, BCL2, SERPINA3, PARP1, CHRNA1, PINX1	1458	106	13528	1.57559	1	0.686805	68.7219
GOTERM_BP_FAT	GO:0006928~cell motion	63	3.35463	0.0625019	CCKAR, JUB, MTSS1, SMCP, RPS6KB1, NR2E1, CTTNBP2, ACTR2, EDNRB, NDE1, SAA2, ANK3, LTB4R, SAA1, IFNG, PLA2G1B, SEMA3B, CEACAM1, SATB2, ROCK1, CCL4L2, NRXN1, OR1D2, MIXL1, CTNNA2, ARHGEF11, SERPINB5, CATSPER3, ITGB1BP1, LYST, CATSPER1, SDCBP, RELN, CNTN4, MAPK8, IL12B, AKAP3, DCC, CER1, ITGAL, CCL2, NDN, FUT8, ENPP2, CALD1, FPR1, PRKDC, CCL5, DNAH5, SRC, VCAM1, HOXA2, DOCK2, PPAP2B, RUNX3, IL6, NTF…	1458	475	13528	1.23062	1	0.696219	69.8317
GOTERM_BP_FAT	GO:0007589~body fluid secretion	7	0.372737	0.0633952	CEL, KCNN4, COPA, LACRT, GUCA2B, AGR2, TP73	1458	27	13528	2.40553	1	0.699843	70.361
GOTERM_BP_FAT	GO:0019320~hexose catabolic process	13	0.692226	0.0634034	FUT8, FUT6, ALDOB, OGDHL, HK2, PGAM2, HK1, PFKM, GCK, HK3, PDHA2, FUT2, EDARADD	1458	69	13528	1.74812	1	0.698222	70.3659
GOTERM_BP_FAT	GO:0008343~adult feeding behavior	4	0.212993	0.0637518	LEP, DMBX1, GHSR, ASIP	1458	9	13528	4.12376	1	0.698608	70.5699
GOTERM_BP_FAT	GO:0048246~macrophage chemotaxis	4	0.212993	0.0637518	EDNRB, CCL2, SAA2, SAA1	1458	9	13528	4.12376	1	0.698608	70.5699
GOTERM_BP_FAT	GO:0032438~melanosome organization	4	0.212993	0.0637518	BLOC1S2, BLOC1S3, LYST, ASIP	1458	9	13528	4.12376	1	0.698608	70.5699
GOTERM_BP_FAT	GO:0010884~positive regulation of lipid storage	4	0.212993	0.0637518	LPL, MSR1, CD36, APOC4	1458	9	13528	4.12376	1	0.698608	70.5699
GOTERM_BP_FAT	GO:0046461~neutral lipid catabolic process	4	0.212993	0.0637518	LPL, APOA5, LIPC, LIPE	1458	9	13528	4.12376	1	0.698608	70.5699
GOTERM_BP_FAT	GO:0019934~cGMP-mediated signaling	4	0.212993	0.0637518	CD36, APOE, AGT, PDZD3	1458	9	13528	4.12376	1	0.698608	70.5699
GOTERM_BP_FAT	GO:0051145~smooth muscle cell differentiation	4	0.212993	0.0637518	BMP4, NTF3, AGT, FGF10	1458	9	13528	4.12376	1	0.698608	70.5699
GOTERM_BP_FAT	GO:0007603~phototransduction, visible light	4	0.212993	0.0637518	PDE6C, ABCA4, SAG, RHO	1458	9	13528	4.12376	1	0.698608	70.5699
GOTERM_BP_FAT	GO:0046464~acylglycerol catabolic process	4	0.212993	0.0637518	LPL, APOA5, LIPC, LIPE	1458	9	13528	4.12376	1	0.698608	70.5699
GOTERM_BP_FAT	GO:0044269~glycerol ether catabolic process	4	0.212993	0.0637518	LPL, APOA5, LIPC, LIPE	1458	9	13528	4.12376	1	0.698608	70.5699
GOTERM_BP_FAT	GO:0009416~response to light stimulus	22	1.17146	0.0648826	GUCA1A, DRD3, DRD5, RRH, GRIN1, CABP4, WRN, BRSK1, ABCA4, SAG, ATXN1, PDE6C, CCND1, CDKN1A, PDE1B, BCL2, MAPK8, IL12B, IVL, CLOCK, TUBB3, RHO	1458	138	13528	1.47918	1	0.703518	71.2229
GOTERM_BP_FAT	GO:0046486~glycerolipid metabolic process	25	1.3312	0.0660283	FGF7, GPLD1, PIGL, APOE, LCAT, APOA5, GALR2, APOH, PLA2G1B, PLA1A, PIGC, LPL, PLD1, PNLIPRP2, PIK3C2A, SIRT1, PCK1, MTTP, CEL, PLCE1, G6PC, CD81, LIPC, LIPE, LIPF	1458	162	13528	1.43186	1	0.708396	71.8706
GOTERM_BP_FAT	GO:0010942~positive regulation of cell death	58	3.08839	0.067349	RBM5, MLH1, CTNNBL1, ACVR1B, MAP3K5, APOE, CASP8, IFNG, CASP1, LTB, LTA, NDUFA13, IFI16, STK4, ARHGEF11, JMY, DAPK1, INHBA, SSTR3, LYST, RIPK1, RIPK3, MAPK8, IL12B, KALRN, PRODH, LALBA, DCC, C9, TNFRSF25, PPP3R1, PRKDC, SFN, TIMP3, SRC, PLAGL1, PPP2CA, AGT, DDX19B, BCL2, RUNX3, BMP4, NGEF, COL4A3, IL2RA, GRIN1, BRCA1, PLG, TP73, CIDEC, NOTCH2, CDKN1A, CUL4A, CASP14, BBC3, ENDOG, CRH, BIK	1458	435	13528	1.23713	1	0.714124	72.6001
GOTERM_BP_FAT	GO:0043085~positive regulation of catalytic activity	68	3.62087	0.0675491	CCKAR, ADORA3, MYBPC3, TNFSF15, TLR6, GHRHR, PRKACG, EDNRB, MAP3K5, FXN, APOE, LTB4R, GAB1, IFNG, APOA5, GALR2, PLA2G1B, APOH, MS4A2, PSMD4, INSR, C5AR1, ANAPC4, ARHGAP27, FSHR, NTSR2, GRM1, GRM5, PLCE1, CCND1, UCN3, EREG, PROK1, RIPK1, F2, CD81, GNAS, RELN, ANAPC7, PRKD3, C9, DRD3, DRD5, C5, ALDOB, FPR1, POT1, HRH1, P2RY6, PSMB6, AGT, BCL2, PSMB2, FCER1A, COL4A3, MSH3, MAP2K1, TGFBR2, WRN, PSMC5…	1458	520	13528	1.21334	1	0.713608	72.709
GOTERM_BP_FAT	GO:0046889~positive regulation of lipid biosynthetic process	6	0.319489	0.0677744	AGT, IFNG, APOA5, AVPR1A, SEC14L2, ABCG1	1458	21	13528	2.65099	1	0.713233	72.8312
GOTERM_BP_FAT	GO:0042981~regulation of apoptosis	101	5.37806	0.0679886	XRCC2, GDF5, RBM5, TNFSF15, NR2E1, CIAPIN1, IL31RA, CTNNBL1, MAP3K5, APOE, IFNG, APOH, BIRC8, DDAH2, BCL2L14, BRAF, ROCK1, CRYAB, ACTN3, HBXIP, STK4, NME5, SSTR3, MSX1, LYST, F2, RIPK3, MAPK8, KALRN, PRODH, LALBA, CCL2, BDKRB2, TIMP3, SRC, PLAGL1, BLOC1S2, RUNX3, NTF3, GNRH1, GRIN1, WRN, BRCA1, CIDEC, NOTCH2, CDKN1A, SFRP1, BBC3, NTRK1, MLH1, EDNRB, ACVR1B, BAG1, BAG3, CASP8, CASP1, LTB, LTA, ESR…	1458	804	13528	1.16558	1	0.712801	72.9469
GOTERM_BP_FAT	GO:0007229~integrin-mediated signaling pathway	13	0.692226	0.0693686	ITGAL, CCM2, FUT8, ADAMTS13, ITGAE, ITGBL1, ITGB1BP1, ITGB6, ADAMTS10, ANGPTL3, CIB3, CEACAM1, ADAMDEC1	1458	70	13528	1.72314	1	0.718655	73.681
GOTERM_BP_FAT	GO:0044275~cellular carbohydrate catabolic process	15	0.798722	0.069591	FUT8, FUT6, ALDOB, OGDHL, HK2, HK1, PGAM2, PFKM, G6PC, GCK, HK3, MGAM, PDHA2, FUT2, EDARADD	1458	85	13528	1.63738	1	0.718257	73.7976
GOTERM_BP_FAT	GO:0031401~positive regulation of protein modification process	28	1.49095	0.0696619	BMP10, ITLN1, FKBP1A, IL31RA, EDNRB, PSMB6, AGT, BCL2, ATG7, PSMB2, IFNG, PSMD4, INSR, FCER1A, IL4, BMP4, IL6, IL5, HCLS1, ANAPC4, BRCA1, CCND1, PSMC5, HPX, CD81, F2, LACRT, ANAPC7	1458	187	13528	1.38929	1	0.717058	73.8346
GOTERM_BP_FAT	GO:0001501~skeletal system development	44	2.34292	0.0714294	IBSP, FGF18, AEBP1, NDST1, TIPARP, DSCAML1, DLK1, SOX6, OTOR, OSTN, EXTL1, CTNNB1, HOXA2, TNFRSF11B, HOXA3, BCL2, IL17F, PTN, LECT2, SPP2, BMP4, SATB2, TBX3, CMKLR1, TGFBR2, MGP, MEPE, COL5A2, PRELP, HOXC10, HOXB3, INHBA, CTSK, AMBN, MSX1, CLEC3B, CLEC3A, DLX5, HOXB6, NAB1, HOXD4, MAPK8, GNAS, BMP8A	1458	319	13528	1.27979	1	0.724751	74.7424
GOTERM_BP_FAT	GO:0045765~regulation of angiogenesis	12	0.638978	0.0717581	TNFRSF1A, COL4A3, IL6, PROK1, IL17F, TEK, GATA4, APOH, ANGPTL3, DDAH1, SPINK5, PLG	1458	63	13528	1.76733	1	0.72489	74.9079
GOTERM_BP_FAT	GO:0007276~gamete generation	53	2.82215	0.0728038	RAD51C, GMCL1L, PGAM2, MLH1, RPS6KB1, PTTG2, TBP, PRKACG, ZNF148, RPL39L, OR7C1, MORC1, FSHR, NME5, TXNDC2, EREG, CATSPER3, SPATA19, DLD, CATSPER1, TESK1, DMC1, ACSBG2, PRKDC, PAQR7, CLDN11, SYCP1, PAQR5, DUSP13, BCL2, AGT, DEFB118, PDILT, SPATA3, SPATA6, PPP2R2B, SPATA5, PPAP2B, SPATA7, BMP4, MAK, TNP1, CELSR2, SIRT1, TNP2, LEP, AFP, TEX15, BIK, PRM1, TSSK2, TSSK4, UTP14C	1458	395	13528	1.24496	1	0.728671	75.4276
GOTERM_BP_FAT	GO:0002697~regulation of immune effector process	17	0.905218	0.0736014	IL4, FCER1A, A2M, IL6, MASP1, IL27RA, AP2S1, DEFB103A, IL28RA, KLRK1, IL21, HPX, IFNG, MS4A2, IL12B, LBP, CD28	1458	101	13528	1.56172	1	0.731139	75.8171
GOTERM_BP_FAT	GO:0000723~telomere maintenance	7	0.372737	0.0736506	HSPA1L, SMG6, PRKDC, WRN, PARP1, POT1, PINX1	1458	28	13528	2.31962	1	0.729858	75.841
GOTERM_BP_FAT	GO:0000272~polysaccharide catabolic process	7	0.372737	0.0736506	OVGP1, G6PC, SPACA3, PGLYRP2, MGAM, HYAL4, CHIT1	1458	28	13528	2.31962	1	0.729858	75.841
GOTERM_BP_FAT	GO:0006917~induction of apoptosis	44	2.34292	0.0741847	LALBA, DCC, C9, TNFRSF25, MLH1, SFN, TIMP3, PLAGL1, ACVR1B, MAP3K5, APOE, PPP2CA, DDX19B, CASP8, CASP1, LTB, RUNX3, LTA, NGEF, COL4A3, NDUFA13, IFI16, BRCA1, PLG, TP73, CIDEC, DAPK1, JMY, ARHGEF11, INHBA, NOTCH2, CDKN1A, SSTR3, CUL4A, CASP14, BBC3, RIPK1, LYST, CRH, RIPK3, BIK, MAPK8, KALRN, PRODH	1458	320	13528	1.27579	1	0.730992	76.0983
GOTERM_BP_FAT	GO:0043065~positive regulation of apoptosis	57	3.03514	0.0756562	RBM5, MLH1, CTNNBL1, ACVR1B, MAP3K5, APOE, CASP8, IFNG, CASP1, LTB, LTA, NDUFA13, IFI16, STK4, ARHGEF11, JMY, DAPK1, INHBA, SSTR3, LYST, RIPK1, RIPK3, MAPK8, IL12B, KALRN, PRODH, LALBA, DCC, C9, TNFRSF25, PPP3R1, PRKDC, SFN, TIMP3, SRC, PLAGL1, PPP2CA, DDX19B, BCL2, AGT, RUNX3, NGEF, COL4A3, IL2RA, GRIN1, BRCA1, PLG, TP73, CIDEC, NOTCH2, CDKN1A, CUL4A, CASP14, BBC3, ENDOG, CRH, BIK	1458	430	13528	1.22994	1	0.73668	76.7939
GOTERM_BP_FAT	GO:0046365~monosaccharide catabolic process	13	0.692226	0.075686	FUT8, FUT6, ALDOB, OGDHL, HK2, PGAM2, HK1, PFKM, GCK, HK3, PDHA2, FUT2, EDARADD	1458	71	13528	1.69887	1	0.735324	76.8078
GOTERM_BP_FAT	GO:0012502~induction of programmed cell death	44	2.34292	0.0783502	LALBA, DCC, C9, TNFRSF25, MLH1, SFN, TIMP3, PLAGL1, ACVR1B, MAP3K5, APOE, PPP2CA, DDX19B, CASP8, CASP1, LTB, RUNX3, LTA, NGEF, COL4A3, NDUFA13, IFI16, BRCA1, PLG, TP73, CIDEC, DAPK1, JMY, ARHGEF11, INHBA, NOTCH2, CDKN1A, SSTR3, CUL4A, CASP14, BBC3, RIPK1, LYST, CRH, RIPK3, BIK, MAPK8, KALRN, PRODH	1458	321	13528	1.27181	1	0.746442	78.0181
GOTERM_BP_FAT	GO:0019748~secondary metabolic process	14	0.745474	0.0788	RARRES2, KYNU, ALDOB, CRABP2, NADSYN1, KMO, CYP1A2, RDH12, GCK, BCL2, DDT, IDI2, ASIP, NAPRT1	1458	79	13528	1.64428	1	0.747046	78.2164
GOTERM_BP_FAT	GO:0007565~female pregnancy	18	0.958466	0.0802358	OVGP1, PZP, PRLHR, GNRH1, TGFBR2, PSG1, AMBP, RLN1, PSG6, BCL2, PSG4, RLN2, SFRP4, CRH, GNAS, GHSR, PRL, LIPE	1458	110	13528	1.51829	1	0.752114	78.8383
GOTERM_BP_FAT	GO:0016338~calcium-independent cell-cell adhesion	6	0.319489	0.0802597	CLDN16, CLDN8, CLDN18, CLDN6, CLDN20, CLDN11	1458	22	13528	2.53049	1	0.750771	78.8485
GOTERM_BP_FAT	GO:0051480~cytosolic calcium ion homeostasis	19	1.01171	0.0811692	CCKAR, JPH4, C5AR1, FKBP1A, BDKRB2, CCR9, CCR8, EDNRB, PLCE1, SAA2, SAA1, CXCL13, CCR3, F2, GALR2, PLCG2, AVPR1A, TRPV4, XCR1	1458	118	13528	1.49399	1	0.753392	79.2335
GOTERM_BP_FAT	GO:0043068~positive regulation of programmed cell death	57	3.03514	0.0835258	RBM5, MLH1, CTNNBL1, ACVR1B, MAP3K5, APOE, CASP8, IFNG, CASP1, LTB, LTA, NDUFA13, IFI16, STK4, ARHGEF11, JMY, DAPK1, INHBA, SSTR3, LYST, RIPK1, RIPK3, MAPK8, IL12B, KALRN, PRODH, LALBA, DCC, C9, TNFRSF25, PPP3R1, PRKDC, SFN, TIMP3, SRC, PLAGL1, PPP2CA, DDX19B, BCL2, AGT, RUNX3, NGEF, COL4A3, IL2RA, GRIN1, BRCA1, PLG, TP73, CIDEC, NOTCH2, CDKN1A, CUL4A, CASP14, BBC3, ENDOG, CRH, BIK	1458	433	13528	1.22141	1	0.762227	80.2005
GOTERM_BP_FAT	GO:0008211~glucocorticoid metabolic process	4	0.212993	0.083998	CYP17A1, SERPINA6, CYP11B2, CRH	1458	10	13528	3.71139	1	0.762824	80.3891
GOTERM_BP_FAT	GO:0042953~lipoprotein transport	4	0.212993	0.083998	MSR1, APOBEC1, CD36, MTTP	1458	10	13528	3.71139	1	0.762824	80.3891
GOTERM_BP_FAT	GO:0043567~regulation of insulin-like growth factor receptor signaling pathway	4	0.212993	0.083998	ATXN1, CILP, GHSR, GHRHR	1458	10	13528	3.71139	1	0.762824	80.3891
GOTERM_BP_FAT	GO:0045745~positive regulation of G-protein coupled receptor protein signaling pathway	4	0.212993	0.083998	ECE1, DRD3, KLK5, TMOD2	1458	10	13528	3.71139	1	0.762824	80.3891
GOTERM_BP_FAT	GO:0045980~negative regulation of nucleotide metabolic process	4	0.212993	0.083998	GRM8, GRM7, CDA, PDZD3	1458	10	13528	3.71139	1	0.762824	80.3891
GOTERM_BP_FAT	GO:0044241~lipid digestion	4	0.212993	0.083998	CEL, SOAT2, ABCG5, PLA2G1B	1458	10	13528	3.71139	1	0.762824	80.3891
GOTERM_BP_FAT	GO:0007178~transmembrane receptor protein serine/threonine kinase signaling pathway	17	0.905218	0.0846185	BMP4, CER1, AMHR2, FMOD, WFIKKN2, BMP10, SMAD9, CCL2, FUT8, TGFBR2, GDF5, FKBP1A, SMAD2, ACVR1B, MSX1, AKAP3, TOB1	1458	103	13528	1.5314	1	0.764042	80.6343
GOTERM_BP_FAT	GO:0006778~porphyrin metabolic process	7	0.372737	0.0847936	AMBP, UGT1A10, FXN, HPX, UROS, GIF, CYP1A2, UGT1A1	1458	29	13528	2.23963	1	0.763379	80.7029
GOTERM_BP_FAT	GO:0006958~complement activation, classical pathway	7	0.372737	0.0847936	C8A, C1QB, C9, MASP2, CD46, C5, C4BPA	1458	29	13528	2.23963	1	0.763379	80.7029
GOTERM_BP_FAT	GO:0033013~tetrapyrrole metabolic process	7	0.372737	0.0847936	AMBP, UGT1A10, FXN, HPX, UROS, GIF, CYP1A2, UGT1A1	1458	29	13528	2.23963	1	0.763379	80.7029
GOTERM_BP_FAT	GO:0032200~telomere organization	7	0.372737	0.0847936	HSPA1L, SMG6, PRKDC, WRN, PARP1, POT1, PINX1	1458	29	13528	2.23963	1	0.763379	80.7029
GOTERM_BP_FAT	GO:0051412~response to corticosterone stimulus	5	0.266241	0.0851339	CDKN1A, UCN3, CCND1, BCL2, AVPR1A	1458	16	13528	2.89952	1	0.763412	80.8357
GOTERM_BP_FAT	GO:0043691~reverse cholesterol transport	5	0.266241	0.0851339	APOE, LCAT, LIPC, APOM, ABCG1	1458	16	13528	2.89952	1	0.763412	80.8357
GOTERM_BP_FAT	GO:0034381~lipoprotein particle clearance	5	0.266241	0.0851339	MSR1, CD36, APOE, LIPC, APOM	1458	16	13528	2.89952	1	0.763412	80.8357
GOTERM_BP_FAT	GO:0017144~drug metabolic process	5	0.266241	0.0851339	CYP3A4, CYP2C9, FMO3, CYP2E1, CYP1A2	1458	16	13528	2.89952	1	0.763412	80.8357
GOTERM_BP_FAT	GO:0001964~startle response	5	0.266241	0.0851339	GLRB, GRIN2B, DRD3, GRIN1, CTNNA2	1458	16	13528	2.89952	1	0.763412	80.8357
GOTERM_BP_FAT	GO:0009582~detection of abiotic stimulus	12	0.638978	0.0858903	NOX3, GUCA1A, PDE6C, GRIN2B, CHRNA9, RRH, NPFFR2, CABP4, ABCA4, SAG, RHO, OTOP1	1458	65	13528	1.71295	1	0.765177	81.1278
GOTERM_BP_FAT	GO:0006022~aminoglycan metabolic process	12	0.638978	0.0858903	OVGP1, SPACA3, GCNT2, NDST1, SPOCK3, GALNT5, PGLYRP2, DCN, ITIH3, HYAL4, B4GALT7, CHIT1	1458	65	13528	1.71295	1	0.765177	81.1278
GOTERM_BP_FAT	GO:0051674~localization of cell	42	2.23642	0.0859296	CER1, DCC, JUB, CCKAR, CCL2, NDN, FUT8, SMCP, PRKDC, RPS6KB1, CCL5, NR2E1, SRC, DNAH5, VCAM1, CTTNBP2, EDNRB, DOCK2, NDE1, SAA2, SAA1, IFNG, PLA2G1B, PPAP2B, CEACAM1, IL6, SATB2, ROCK1, PODXL, TNP1, MIXL1, TNP2, CTNNA2, CDH13, CATSPER3, ITGB1BP1, LYST, CATSPER1, SDCBP, RELN, IL12B, SELE	1458	307	13528	1.26937	1	0.763958	81.1429
GOTERM_BP_FAT	GO:0048870~cell motility	42	2.23642	0.0859296	CER1, DCC, JUB, CCKAR, CCL2, NDN, FUT8, SMCP, PRKDC, RPS6KB1, CCL5, NR2E1, SRC, DNAH5, VCAM1, CTTNBP2, EDNRB, DOCK2, NDE1, SAA2, SAA1, IFNG, PLA2G1B, PPAP2B, CEACAM1, IL6, SATB2, ROCK1, PODXL, TNP1, MIXL1, TNP2, CTNNA2, CDH13, CATSPER3, ITGB1BP1, LYST, CATSPER1, SDCBP, RELN, IL12B, SELE	1458	307	13528	1.26937	1	0.763958	81.1429
GOTERM_BP_FAT	GO:0032675~regulation of interleukin-6 production	8	0.425985	0.0860399	BPI, IL6, EREG, IL17F, IFNG, LBP, GHSR, TLR6	1458	36	13528	2.06188	1	0.763038	81.1851
GOTERM_BP_FAT	GO:0010740~positive regulation of protein kinase cascade	25	1.3312	0.0867942	GJA1, FKBP1A, TLR6, CTNNB1, IL31RA, TNFRSF1A, AGT, CASP8, IFNG, CASP1, NENF, LTB, INSR, PRL, LTA, IL4, IL6, IL5, HCLS1, FGF21, LGALS9, LEP, APOL3, HPX, RIPK1	1458	167	13528	1.38899	1	0.76478	81.4713
GOTERM_BP_FAT	GO:0009791~post-embryonic development	13	0.692226	0.0893893	BMP4, TIPARP, GDF5, CCDC47, SMAD2, CYP1A2, SOX6, DLK1, TP73, FOXP2, TAL2, BCL2, GNAS	1458	73	13528	1.65233	1	0.773865	82.425
GOTERM_BP_FAT	GO:0019216~regulation of lipid metabolic process	18	0.958466	0.0914073	DRD3, STK11, RB1, SEC14L2, ABCG1, BRCA1, LEP, SLC25A20, APOE, AGT, CD81, IFNG, APOA5, SERPINA3, AVPR1A, ANGPTL3, GHSR, APOM	1458	112	13528	1.49118	1	0.780364	83.1342
GOTERM_BP_FAT	GO:0048511~rhythmic process	20	1.06496	0.0923454	BMP4, HLF, FGF7, DRD3, GNRH1, SLC9A3, PROKR2, FSHR, SIRT1, LEP, AFP, INHBA, GRIN2B, EREG, BCL2, AGT, CRH, DMC1, CLOCK, ATP7B	1458	128	13528	1.44976	1	0.782605	83.4547
GOTERM_BP_FAT	GO:0002326~B cell lineage commitment	3	0.159744	0.0929399	BCL2, PRKDC, RAG2	1458	5	13528	5.56708	1	0.783526	83.6547
GOTERM_BP_FAT	GO:0034391~regulation of smooth muscle cell apoptosis	3	0.159744	0.0929399	IFNG, APOH, IL12B	1458	5	13528	5.56708	1	0.783526	83.6547
GOTERM_BP_FAT	GO:0043647~inositol phosphate metabolic process	3	0.159744	0.0929399	PLCG2, GALR2, PTAFR	1458	5	13528	5.56708	1	0.783526	83.6547
GOTERM_BP_FAT	GO:0060155~platelet dense granule organization	3	0.159744	0.0929399	BLOC1S2, BLOC1S3, DTNBP1	1458	5	13528	5.56708	1	0.783526	83.6547
GOTERM_BP_FAT	GO:0002360~T cell lineage commitment	3	0.159744	0.0929399	BCL2, PRKDC, RAG2	1458	5	13528	5.56708	1	0.783526	83.6547
GOTERM_BP_FAT	GO:0010886~positive regulation of cholesterol storage	3	0.159744	0.0929399	LPL, MSR1, CD36	1458	5	13528	5.56708	1	0.783526	83.6547
GOTERM_BP_FAT	GO:0046173~polyol biosynthetic process	3	0.159744	0.0929399	PLCG2, PTAFR, PCK1	1458	5	13528	5.56708	1	0.783526	83.6547
GOTERM_BP_FAT	GO:0006704~glucocorticoid biosynthetic process	3	0.159744	0.0929399	CYP17A1, CYP11B2, CRH	1458	5	13528	5.56708	1	0.783526	83.6547
GOTERM_BP_FAT	GO:0042531~positive regulation of tyrosine phosphorylation of STAT protein	6	0.319489	0.093879	IL4, IL6, HPX, HCLS1, IFNG, IL31RA	1458	23	13528	2.42047	1	0.785715	83.9661
GOTERM_BP_FAT	GO:0033059~cellular pigmentation	6	0.319489	0.093879	BLOC1S2, MAP2K1, BLOC1S3, LYST, BCL2, ASIP	1458	23	13528	2.42047	1	0.785715	83.9661
GOTERM_BP_FAT	GO:0002520~immune system development	38	2.02343	0.0946116	TM7SF4, TIPARP, PRKDC, FGF10, MLH1, SFXN1, SOX6, RAG2, CIAPIN1, CTNNBL1, CTNNB1, IL31RA, VCAM1, TAL1, DOCK2, HOXA3, BCL2, CASP8, LTB, TLX1, LTA, THPO, CD28, IL4, BMP4, MSH3, FLT3, HCLS1, TGFBR2, RB1, IFI16, HOXB3, INHBA, NOTCH2, CXCL13, NTRK1, PLCG2, IL12B	1458	276	13528	1.27747	1	0.787113	84.2051
GOTERM_BP_FAT	GO:0046165~alcohol biosynthetic process	9	0.479233	0.095055	G6PC, ALDOB, PLCG2, PGAM2, TSTA3, FBP2, PTAFR, PCK1, G6PC2	1458	44	13528	1.89787	1	0.787443	84.3481
GOTERM_BP_FAT	GO:0051247~positive regulation of protein metabolic process	34	1.81044	0.0959616	BMP10, ITLN1, GJA1, FKBP1A, IL31RA, EDNRB, PSMB6, APOE, ATG7, BCL2, AGT, IFNG, PSMB2, PSMD4, INSR, CD28, FCER1A, IL4, BMP4, F12, IL6, IL5, HCLS1, ANAPC4, BRCA1, CCND1, CBLB, PSMC5, HPX, TRIM32, LACRT, CD81, F2, ANAPC7	1458	243	13528	1.29822	1	0.789444	84.6367
GOTERM_BP_FAT	GO:0042035~regulation of cytokine biosynthetic process	13	0.692226	0.096778	FCER1A, IL6, ZNF287, IL21, TLR6, INHBA, EREG, IFNG, IL17F, IL12B, GHSR, LTB, CD28	1458	74	13528	1.63	1	0.791092	84.8923
GOTERM_BP_FAT	GO:0060429~epithelium development	32	1.70394	0.0984323	EHF, LCE1B, SPRR2E, SFN, SPINK5, CTNNB1, SPRR2D, SPRR2A, UPK1A, BCL2, AGT, TGM1, CASP8, POU3F1, IVL, BMP4, LCE4A, MAP2K1, FOXN1, LCE2B, SCEL, NOTCH2, EVPL, EREG, CA9, LCE1F, FLG, DLX5, GRLF1, SPRR3, LCE3E, DMBT1	1458	227	13528	1.30798	1	0.795648	85.3979
GOTERM_BP_FAT	GO:0000187~activation of MAPK activity	14	0.745474	0.0991918	FCER1A, C5AR1, MAP2K1, C5, FPR1, GRM1, PLCE1, MAP3K5, PROK1, RIPK1, CD81, GAB1, PLA2G1B, INSR	1458	82	13528	1.58413	1	0.797024	85.6246
Enriched GO terms (Biological processes) in Meth3
Category	Term	Count	%	PValue	Genes	List Total	Pop Hits	Pop Total	Fold Enrichment	Bonferroni	Benjamini	FDR
GOTERM_BP_FAT	GO:0030182~neuron differentiation	93	5.39443	4.36236e-11	NRP1, EVX1, FOXA2, GDF7, EFNA1, PAX6, JAG2, CNP, KCNIP2, PRKG1, PAX2, CXCL12, PTEN, HOXD10, WNT1, APP, UNC5B, CD44, UNC5A, NKX6-2, POU4F2, SEMA3B, OLIG2, CHAT, PHOX2A, PRKCA, EGFR, MYO6, EMX1, PTF1A, VAX1, SLIT1, CDK5, VASP, SLIT2, ASCL1, BTG2, ADM, RASGRF1, BTG4, CNTN2, TRAPPC4, EFNA5, NGFR, C1ORF187, UBA52, RAB3A, CCK, IRX5, SOX1, ERBB2, SOX2, CLU, SOX5, ABI2, CDH1, MYCBP2, ALCAM, ALDH1A2, LHX1…	1424	438	13528	2.01712	1.77636e-07	1.77636e-07	8.12238e-08
GOTERM_BP_FAT	GO:0006928~cell motion	93	5.39443	3.66316e-09	PVR, SLC22A16, NEURL, ACVRL1, NRP1, GDF7, TUBB2C, WASF2, PAX6, MYLIP, PRKG1, CXCL12, PTEN, VCL, PEX7, WNT2, CD97, ACTR3, EDNRB, ACTR2, WNT1, CTTNBP2, APP, UNC5B, CD44, UNC5A, POU4F2, SEMA3B, NR2F2, SYK, TWIST1, PRKCA, NODAL, BARHL1, SIX4, VAX1, SLIT1, CDK5, VASP, SLIT2, ASCL1, IGSF8, NCK1, SIX1, CNTN2, IL12A, SDCBP, HSPB1, FOXC1, EFNA5, NGFR, C1ORF187, UBA52, CAV2, CCK, SOX1, ERBB2, ABI2, KITLG, …	1424	475	13528	1.86	1.49163e-05	7.45817e-06	6.82051e-06
GOTERM_BP_FAT	GO:0031175~neuron projection development	60	3.48028	4.06011e-09	NRP1, GDF7, PAX6, CNP, PAX2, PRKG1, PTEN, CXCL12, APP, CD44, UNC5B, UNC5A, POU4F2, SEMA3B, CHAT, PRKCA, EGFR, MYO6, VAX1, CDK5, SLIT1, VASP, SLIT2, ADM, RASGRF1, CNTN2, TRAPPC4, EFNA5, NGFR, C1ORF187, UBA52, RAB3A, CCK, ERBB2, CLU, ABI2, CDH1, MYCBP2, ALCAM, LHX2, BCL2, BAI1, RAC1, LHX4, ETV4, RUNX3, MAP2K1, ITGA1, RTN4R, DPYSL5, CELSR2, NTN1, EPHA4, EPHA7, NOTCH1, SEMA6C, DLX5, PHGDH, CYFIP1, AP…	1424	256	13528	2.22656	1.65326e-05	5.51091e-06	7.5596e-06
GOTERM_BP_FAT	GO:0048666~neuron development	71	4.11833	1.99602e-08	NRP1, GDF7, PAX6, CNP, KCNIP2, PAX2, PRKG1, CXCL12, PTEN, HOXD10, APP, UNC5B, CD44, UNC5A, POU4F2, SEMA3B, CHAT, PRKCA, EGFR, MYO6, VAX1, CDK5, SLIT1, VASP, SLIT2, ASCL1, ADM, RASGRF1, CNTN2, TRAPPC4, EFNA5, NGFR, C1ORF187, UBA52, RAB3A, IRX5, CCK, SOX1, ERBB2, CLU, ABI2, CDH1, MYCBP2, ALCAM, LHX2, BCL2, MTCH1, RAC1, BAI1, LHX4, LHX6, ETV4, RUNX3, MAP2K1, ITGA1, RTN4R, NTN4, DPYSL5, CELSR2, SOD1,…	1424	339	13528	1.98968	8.12745e-05	2.03192e-05	3.71643e-05
GOTERM_BP_FAT	GO:0030030~cell projection organization	74	4.29234	5.75411e-08	NEURL, NRP1, PDGFA, GDF7, WASF2, PAX6, CNP, PRKG1, PAX2, CXCL12, PTEN, VCL, AKT1, APP, UNC5B, CD44, UNC5A, POU4F2, SEMA3B, LRRC50, CHAT, PRKCA, EGFR, MYO6, VAX1, CDK5, SLIT1, VASP, SLIT2, SPAG6, ADM, RASGRF1, NCK1, CNTN2, SDCBP, TRAPPC4, EFNA5, NGFR, C1ORF187, UBA52, RAB3A, CCK, BBS7, ERBB2, CLU, ABI2, CDH1, MYCBP2, ALCAM, LHX2, BCL2, RAC1, BAI1, LHX4, ETV4, RUNX3, MAP2K1, ITGA1, RTN4R, ARFIP2, D…	1424	368	13528	1.91033	0.00023428	4.68604e-05	0.000107137
GOTERM_BP_FAT	GO:0045165~cell fate commitment	38	2.20418	6.72373e-08	MYOD1, FGFR4, ERBB4, EVX1, MCL1, FOXA2, GDF7, SOX2, MITF, SOX5, PAX6, JAG2, PAX2, ITGB1, HOXD10, WNT1, SPRY2, BCL2, NKX6-2, LHX6, OLIG2, TLX3, NR2F2, NKX2-2, TBX6, NODAL, SMAD5, PTF1A, SIX3, NEUROG1, DLL1, TBX1, KDR, ASCL1, NOTCH1, EYA2, SIX1, FOXC2	1424	139	13528	2.59712	0.000273753	4.56307e-05	0.00012519
GOTERM_BP_FAT	GO:0048812~neuron projection morphogenesis	50	2.90023	8.89013e-08	NRP1, GDF7, PAX6, CNP, PAX2, CXCL12, APP, UNC5B, UNC5A, POU4F2, SEMA3B, PRKCA, EGFR, VAX1, CDK5, SLIT1, SLIT2, VASP, ADM, CNTN2, EFNA5, NGFR, UBA52, C1ORF187, RAB3A, CCK, ERBB2, CLU, MYCBP2, ALCAM, BCL2, LHX2, BAI1, RAC1, LHX4, RUNX3, ETV4, MAP2K1, ITGA1, DPYSL5, RTN4R, CELSR2, NTN1, EPHA4, NOTCH1, EPHA7, SEMA6C, DLX5, CYFIP1, APBB1	1424	213	13528	2.23005	0.000361941	5.17138e-05	0.000165527
GOTERM_BP_FAT	GO:0007411~axon guidance	32	1.85615	9.66118e-08	NRP1, GDF7, ERBB2, PAX6, CXCL12, MYCBP2, ALCAM, APP, UNC5B, UNC5A, LHX2, RAC1, LHX4, POU4F2, SEMA3B, ETV4, RUNX3, DPYSL5, VAX1, CDK5, NTN1, SLIT1, SLIT2, VASP, EPHA4, EPHA7, SEMA6C, EFNA5, NGFR, APBB1, UBA52, C1ORF187	1424	107	13528	2.84112	0.000393326	4.91742e-05	0.000179883
GOTERM_BP_FAT	GO:0010604~positive regulation of macromolecule metabolic process	139	8.06265	1.38054e-07	MYOD1, THRB, IL6ST, GDF7, PDGFA, CDC16, HOXD10, CBFB, CITED2, IL11, WNT1, APP, BRPF1, MYOCD, GATA4, MYST3, EIF2B5, SYK, MYO6, ANAPC5, NODAL, SIX3, TNFRSF14, ARNTL, SIX4, ELL3, IRS1, ASCL1, PSMA1, JUN, PSMA4, SIX1, PSMA3, VGLL2, PIAS1, UBA52, CAV1, RAG1AP1, CRTC1, SOX2, SOX5, BMPR2, PIN1, T, PSMB6, NPM2, FBXO5, NKX2-2, KLF6, UTF1, MAP2K1, MAFB, SMAD5, GRIN1, CD276, ITGA2, NR4A3, KLF15, NEUROG3, PS…	1424	857	13528	1.54084	0.000561996	6.24596e-05	0.000257045
GOTERM_BP_FAT	GO:0006357~regulation of transcription from RNA polymerase II promoter	122	7.07657	1.46737e-07	MYOD1, THRB, CBX4, CBFB, HOXD10, IL11, CITED2, APP, MYOCD, NKX6-2, GATA4, OLIG2, TWIST1, MYO6, NODAL, GABPA, RBL1, SIX3, ZNF8, ARNTL, VAX1, SIX4, TAF6L, ELL3, PKIA, ASCL1, UHRF1, TIAL1, JUN, SIX1, VGLL2, TFAP2C, HMGB1, ZNF76, CRTC1, SOX2, SOX5, T, PFN1, DRAP1, OVOL1, TEF, SKIL, NKX2-2, KLF6, TCF7, UTF1, MAP2K1, MAFB, GRIN1, SMAD5, NEUROG1, TFCP2, NR4A3, NEUROG3, CDKN1C, HOXB4, NOTCH1, HIVEP1, TCF…	1424	727	13528	1.59422	0.000597335	5.97496e-05	0.000273213
GOTERM_BP_FAT	GO:0010605~negative regulation of macromolecule metabolic process	121	7.01856	4.34717e-07	EIF2C1, THRB, CBX4, CBX3, CDC16, CITED2, EIF4EBP1, CDKN2A, WWP2, GRIN2C, NKX6-2, OLIG2, MYST3, EIF2B5, TWIST1, ANAPC5, NODAL, GABPA, RBL1, ZHX1, SIX3, HRK, CST3, ZNF8, VAX1, PKIA, PSMA1, PSMA4, JUN, PSMA3, UBA52, HMGB1, CAV1, ENPP1, SOX2, IGF2BP2, PSMB6, DRAP1, OVOL1, FBXO5, SKIL, HELLS, L3MBTL, CD276, BRCA2, PSMB9, CDKN1C, HOXB4, PSMC6, CDKN1B, MLX, HIVEP1, NCOR1, ARID4A, E2F6, TSG101, TBX20, HR…	1424	734	13528	1.56608	0.0017686	0.000160911	0.000809406
GOTERM_BP_FAT	GO:0009890~negative regulation of biosynthetic process	99	5.74246	6.55831e-07	EIF2C1, THRB, PDGFA, CBX4, CBX3, CITED2, HTR1B, EIF4EBP1, NKX6-2, OLIG2, TWIST1, EIF2B5, MYST3, NODAL, ZHX1, RBL1, GABPA, SIX3, ZNF8, VAX1, PKIA, HMGB1, CAV1, ENPP1, DRD4, SOX2, IGF2BP2, DRAP1, OVOL1, SKIL, HELLS, L3MBTL, CD276, BRCA2, CDKN1C, HOXB4, CDKN1B, MLX, HIVEP1, NCOR1, ARID4A, TSG101, E2F6, TBX20, HR, NFKB1, PAX2, PDCD4, SAP30, PCGF2, BARX2, HEY1, ZNF148, POU4F2, LRRFIP1, NR2F2, DEDD2, N…	1424	573	13528	1.64136	0.00266698	0.000222521	0.0012211
GOTERM_BP_FAT	GO:0032990~cell part morphogenesis	54	3.13225	9.66198e-07	NRP1, GDF7, PAX6, CNP, PAX2, CXCL12, APP, UNC5B, UNC5A, POU4F2, SEMA3B, LRRC50, PRKCA, EGFR, VAX1, CDK5, SLIT1, SLIT2, VASP, MFN2, ADM, CNTN2, EFNA5, NGFR, UBA52, C1ORF187, RAB3A, CCK, BBS7, ERBB2, CLU, MYCBP2, ALCAM, BCL2, LHX2, BAI1, RAC1, LHX4, ETV4, RUNX3, DNM1L, MAP2K1, ITGA1, DPYSL5, RTN4R, CELSR2, NTN1, EPHA4, NOTCH1, EPHA7, SEMA6C, DLX5, CYFIP1, APBB1	1424	256	13528	2.00391	0.00392663	0.000302597	0.00179897
GOTERM_BP_FAT	GO:0048858~cell projection morphogenesis	52	3.01624	1.30069e-06	NRP1, GDF7, PAX6, CNP, PAX2, CXCL12, APP, UNC5B, UNC5A, POU4F2, SEMA3B, LRRC50, PRKCA, EGFR, VAX1, CDK5, SLIT1, SLIT2, VASP, ADM, CNTN2, EFNA5, NGFR, UBA52, C1ORF187, RAB3A, CCK, BBS7, ERBB2, CLU, MYCBP2, ALCAM, BCL2, LHX2, BAI1, RAC1, LHX4, ETV4, RUNX3, MAP2K1, ITGA1, DPYSL5, RTN4R, CELSR2, NTN1, EPHA4, NOTCH1, EPHA7, SEMA6C, DLX5, CYFIP1, APBB1	1424	245	13528	2.01633	0.00528239	0.000378242	0.00242175
GOTERM_BP_FAT	GO:0051174~regulation of phosphorus metabolic process	86	4.9884	1.31372e-06	CCNT2, ADCY4, ADCY1, IL6ST, GDF7, EFNA1, PDGFA, PKMYT1, PRDX2, PDCD4, PTEN, IL11, AKT1, EDNRB, SPRY2, APP, CDKN2A, MCM7, CDKN2B, MAP3K9, CHRFAM7A, SYK, EGFR, PRKCA, RBL1, HERC5, TNFRSF14, RB1, PKIA, CDK5, PRKCD, IRS1, OSM, ACVR2A, CCND1, ADRB2, TNFRSF10B, EREG, CCND2, SAPS3, JUN, CD81, MAP3K10, IL12A, GADD45B, TRAF2, CAV1, CCK, CDK5R2, ENPP1, PFKFB2, ERBB2, DRD4, BMPR2, KITLG, DUSP12, FKBP1B, PIN…	1424	485	13528	1.68454	0.0053352	0.000356569	0.00244602
GOTERM_BP_FAT	GO:0019220~regulation of phosphate metabolic process	86	4.9884	1.31372e-06	CCNT2, ADCY4, ADCY1, IL6ST, GDF7, EFNA1, PDGFA, PKMYT1, PRDX2, PDCD4, PTEN, IL11, AKT1, EDNRB, SPRY2, APP, CDKN2A, MCM7, CDKN2B, MAP3K9, CHRFAM7A, SYK, EGFR, PRKCA, RBL1, HERC5, TNFRSF14, RB1, PKIA, CDK5, PRKCD, IRS1, OSM, ACVR2A, CCND1, ADRB2, TNFRSF10B, EREG, CCND2, SAPS3, JUN, CD81, MAP3K10, IL12A, GADD45B, TRAF2, CAV1, CCK, CDK5R2, ENPP1, PFKFB2, ERBB2, DRD4, BMPR2, KITLG, DUSP12, FKBP1B, PIN…	1424	485	13528	1.68454	0.0053352	0.000356569	0.00244602
GOTERM_BP_FAT	GO:0007409~axonogenesis	44	2.5522	1.35234e-06	RAB3A, CCK, NRP1, GDF7, ERBB2, PAX6, CNP, PAX2, CXCL12, MYCBP2, ALCAM, APP, UNC5B, UNC5A, LHX2, BCL2, BAI1, RAC1, LHX4, POU4F2, SEMA3B, ETV4, RUNX3, PRKCA, RTN4R, DPYSL5, VAX1, CDK5, SLIT1, NTN1, SLIT2, VASP, EPHA4, EPHA7, NOTCH1, SEMA6C, DLX5, CNTN2, CYFIP1, EFNA5, NGFR, APBB1, C1ORF187, UBA52	1424	193	13528	2.1658	0.00549159	0.000344111	0.00251792
GOTERM_BP_FAT	GO:0031327~negative regulation of cellular biosynthetic process	96	5.56845	1.53722e-06	EIF2C1, THRB, ARID4A, E2F6, PDGFA, TSG101, TBX20, HR, CBX4, CBX3, NFKB1, PAX2, PDCD4, CITED2, SAP30, PCGF2, EIF4EBP1, HTR1B, BARX2, HEY1, ZNF148, NKX6-2, POU4F2, OLIG2, LRRFIP1, NR2F2, DEDD2, MYST3, EIF2B5, NFX1, TWIST1, EGR1, PRKCA, KHDRBS1, CTBP2, SOX14, NODAL, GABPA, RBL1, ZHX1, SIX3, ZNF8, UBE2I, RB1, SPEN, VAX1, PKIA, PURB, PURA, COBRA1, EREG, NAB2, MAP3K10, RASD1, ZMYND11, BTAF1, HMGB1, CAV…	1424	561	13528	1.62567	0.00624001	0.000368142	0.00286214
GOTERM_BP_FAT	GO:0051726~regulation of cell cycle	64	3.7123	2.03046e-06	CCNT2, E2F2, DYNC1LI1, XPO1, PKMYT1, CDC16, PDCD4, PTEN, CITED2, AKT1, TRIAP1, APP, CDKN2A, CDKN2B, E4F1, TPR, ZW10, DLG1, EGFR, CDC7, CYP1A1, HERC5, RB1, TACC3, CDK5, PKIA, CDK2, OSM, CCND1, UHRF2, EREG, CCND2, BTG4, JUN, BUB1B, FOXC1, NGFR, GADD45B, CAV2, CDK5R2, ANLN, ASNS, ZBTB17, ITGB1, MYCBP2, PIN1, NPM2, BCL2, FBXO5, AATF, RUNX3, L3MBTL, NEUROG1, BRCA2, BIRC5, IGF2, PDE3A, CDC25A, OBFC2B, …	1424	331	13528	1.83686	0.00823395	0.00045923	0.00378048
GOTERM_BP_FAT	GO:0048667~cell morphogenesis involved in neuron differentiation	46	2.66821	2.08666e-06	RAB3A, CCK, NRP1, GDF7, ERBB2, PAX6, CNP, PAX2, CXCL12, MYCBP2, ALCAM, APP, UNC5B, UNC5A, LHX2, BCL2, BAI1, RAC1, LHX4, POU4F2, SEMA3B, ETV4, RUNX3, PRKCA, RTN4R, DPYSL5, CELSR2, VAX1, SOD1, CDK5, SLIT1, NTN1, SLIT2, VASP, EPHA4, EPHA7, NOTCH1, SEMA6C, DLX5, CNTN2, CYFIP1, EFNA5, NGFR, APBB1, C1ORF187, UBA52	1424	209	13528	2.09091	0.00846088	0.000447104	0.00388512
GOTERM_BP_FAT	GO:0045449~regulation of transcription	340	19.7216	3.18891e-06	EIF2C1, HMGN2, GDF7, ZNF250, RAB1A, HOXD10, CITED2, BRPF1, APP, CRY2, NKX6-2, SFRS8, ZNF248, TIGD3, TWIST1, PITX2, PHOX2A, EMX1, ZNF507, BARHL1, NODAL, ZHX1, TAF6L, SUV420H2, UHRF1, RAB18, JUN, ZZZ3, VGLL2, TGFBRAP1, PIAS1, ELL, ZNF76, CRTC1, MYBL1, ZNF512, T, PFN1, KRAS, DRAP1, LHX1, LHX2, LHX3, CASZ1, LHX4, LHX6, NKX2-2, PLAG1, KLF6, UTF1, TCF7, ZNF624, MAP2K1, SMAD5, L3MBTL, CELSR2, TFCP2, KLF…	1424	2601	13528	1.24183	0.0129013	0.000649053	0.00593734
GOTERM_BP_FAT	GO:0007389~pattern specification process	54	3.13225	3.64679e-06	NRP1, EVX1, FOXA2, TBX20, PAX6, CXCL12, HOXD10, CITED2, WNT1, PCGF2, NKX6-2, GATA4, FRAT1, ASPH, HHIP, ALX4, NR2F2, PITX2, RAX, EMX1, NODAL, RING1, SIX3, CYP26A1, DLL1, ACVR2A, ASCL1, HIPK1, BTG2, SIX1, ROR2, FOXC2, MFNG, BBS7, BMPR2, CXXC4, GREM1, TCF7L1, T, ALDH1A2, LHX1, LHX2, SIM2, DVL2, MAFB, SMAD5, TGFBR2, CELSR2, TBX1, HOXB4, NOTCH1, SFRP2, PBX3, TCF15	1424	267	13528	1.92135	0.01474	0.00070688	0.00678981
GOTERM_BP_FAT	GO:0032989~cellular component morphogenesis	72	4.17633	4.82493e-06	NEURL, NRP1, GDF7, PAX6, CNP, PAX2, CXCL12, WNT1, APP, UNC5B, UNC5A, POU4F2, SEMA3B, LRRC50, ZW10, DLG1, PRKCA, EGFR, ARHGEF2, PDPN, NODAL, VAX1, CDK5, SLIT1, VASP, SLIT2, MFN2, SS18, ADM, CNTN2, EFNA5, NGFR, NEURL2, C1ORF187, UBA52, ADD1, RAB3A, CCK, BBS7, ERBB2, CLU, ITGB1, MYCBP2, ALCAM, CD9, DOCK2, LHX2, BCL2, RAC1, BAI1, LHX4, ETV4, RUNX3, FN1, DNM1L, MAP2K1, ITGA1, RTN4R, DPYSL5, CELSR2, SO…	1424	397	13528	1.72292	0.0194554	0.000892654	0.00898325
GOTERM_BP_FAT	GO:0000902~cell morphogenesis	66	3.82831	6.00958e-06	NRP1, GDF7, PAX6, CNP, PAX2, CXCL12, WNT1, APP, UNC5B, UNC5A, POU4F2, SEMA3B, LRRC50, ZW10, DLG1, PRKCA, EGFR, ARHGEF2, PDPN, NODAL, VAX1, CDK5, SLIT1, VASP, SLIT2, SS18, ADM, CNTN2, EFNA5, NGFR, C1ORF187, UBA52, ADD1, RAB3A, CCK, BBS7, ERBB2, CLU, MYCBP2, ALCAM, DOCK2, LHX2, BCL2, BAI1, RAC1, LHX4, ETV4, RUNX3, FN1, MAP2K1, ITGA1, RTN4R, DPYSL5, CELSR2, SOD1, NTN1, EPHA4, EPHA7, NOTCH1, SEMA6C, …	1424	356	13528	1.76124	0.0241741	0.00106339	0.0111888
GOTERM_BP_FAT	GO:0051252~regulation of RNA metabolic process	246	14.2691	8.87295e-06	HMGN2, ZNF250, HOXD10, RAB1A, CITED2, APP, NKX6-2, ZNF248, TWIST1, PITX2, PHOX2A, EMX1, NODAL, BARHL1, ZHX1, TAF6L, UHRF1, RAB18, JUN, SERBP1, VGLL2, PIAS1, CRTC1, ZNF76, MYBL1, T, PFN1, LHX1, DRAP1, LHX2, LHX3, LHX4, LHX6, NKX2-2, KLF6, DHX9, UTF1, ZNF624, TCF7, MAP2K1, SMAD5, L3MBTL, CELSR2, TFCP2, KLF15, ZSCAN2, SHOX2, NOTCH1, YY1AP1, ZNF211, ETS2, MLX, DLX5, ZNF213, DLX4, NCOR1, TCF12, TCF15,…	1424	1813	13528	1.28902	0.0354859	0.00150432	0.0165194
GOTERM_BP_FAT	GO:0010558~negative regulation of macromolecule biosynthetic process	91	5.27842	9.60552e-06	EIF2C1, THRB, ARID4A, E2F6, TSG101, TBX20, HR, CBX4, CBX3, NFKB1, PAX2, PDCD4, CITED2, SAP30, PCGF2, EIF4EBP1, BARX2, HEY1, ZNF148, NKX6-2, POU4F2, OLIG2, LRRFIP1, NR2F2, DEDD2, MYST3, EIF2B5, NFX1, TWIST1, EGR1, PRKCA, KHDRBS1, CTBP2, SOX14, NODAL, GABPA, RBL1, ZHX1, SIX3, ZNF8, UBE2I, RB1, SPEN, VAX1, PKIA, PURB, PURA, COBRA1, EREG, NAB2, MAP3K10, RASD1, ZMYND11, BTAF1, HMGB1, ENPP1, SOX2, IGF2…	1424	547	13528	1.58044	0.0383588	0.00156333	0.0178832
GOTERM_BP_FAT	GO:0042981~regulation of apoptosis	124	7.19258	9.6697e-06	SNCB, TUBB2C, CBX4, JAG2, CITED2, APP, CDKN2A, CD44, TIAM1, TPT1, PIK3CA, MX1, WWOX, RAB27A, EGFR, SOCS2, PTPRF, DFFA, BARHL1, HRK, ACTN1, FADD, POLB, CD38, RASGRF1, TIAL1, TXNDC5, JUN, HSPB1, TNFAIP3, UBA52, NMNAT1, HMGB1, TRAF2, MCL1, ERBB2, CLU, STK17B, HSPA1A, STK17A, SLC11A2, SERINC3, KRAS, MTCH1, RAC1, LHX4, DIABLO, HSPE1, BMF, RUNX3, HELLS, GRIN1, ITGA1, BRCA2, TRIO, CIDEA, WRN, VAV2, PPIF…	1424	804	13528	1.46517	0.0386101	0.00151328	0.0180027
GOTERM_BP_FAT	GO:0001708~cell fate specification	18	1.04408	9.68869e-06	TBX6, FGFR4, FOXA2, EVX1, SOX2, SIX3, TBX1, ITGB1, HOXD10, ASCL1, WNT1, NOTCH1, EYA2, NKX6-2, SIX1, OLIG2, TLX3, NKX2-2	1424	51	13528	3.35294	0.0386844	0.00146014	0.018038
GOTERM_BP_FAT	GO:0043067~regulation of programmed cell death	125	7.25058	9.77896e-06	SNCB, TUBB2C, CBX4, JAG2, CITED2, APP, CDKN2A, CD44, TIAM1, TPT1, PIK3CA, MX1, WWOX, RAB27A, EGFR, SOCS2, PTPRF, DFFA, BARHL1, HRK, ACTN1, FADD, POLB, CD38, RASGRF1, TIAL1, TXNDC5, JUN, HSPB1, TNFAIP3, UBA52, NMNAT1, HMGB1, TRAF2, MCL1, ERBB2, CLU, STK17B, HSPA1A, STK17A, SLC11A2, SERINC3, KRAS, MTCH1, RAC1, LHX4, DIABLO, HSPE1, BMF, RUNX3, HELLS, GRIN1, ITGA1, BRCA2, TRIO, CIDEA, WRN, VAV2, PPIF…	1424	812	13528	1.46244	0.0390377	0.00142114	0.0182061
GOTERM_BP_FAT	GO:0016477~cell migration	54	3.13225	9.94736e-06	PVR, NRP1, ACVRL1, WASF2, PAX6, PRKG1, PTEN, CXCL12, PEX7, WNT2, WNT1, CTTNBP2, EDNRB, CD44, NR2F2, SYK, TWIST1, PRKCA, BARHL1, NODAL, VAX1, SIX4, CDK5, SLIT2, ASCL1, NCK1, SIX1, IL12A, CNTN2, SDCBP, FOXC1, CAV2, CCK, SOX1, KITLG, ABI2, CDH2, ITGB1, DOCK2, CKLF, RAC1, LHX6, TLX3, FN1, ITGA1, TBX1, VAV2, YWHAE, NTN1, KDR, CDH13, CXCL16, FOXE1, APBB1	1424	276	13528	1.8587	0.0396964	0.00139578	0.0185196
GOTERM_BP_FAT	GO:0006355~regulation of transcription, DNA-dependent	241	13.9791	1.00145e-05	HMGN2, ZNF250, HOXD10, RAB1A, CITED2, APP, NKX6-2, ZNF248, TWIST1, PITX2, PHOX2A, EMX1, NODAL, BARHL1, ZHX1, TAF6L, UHRF1, RAB18, JUN, VGLL2, PIAS1, CRTC1, ZNF76, MYBL1, T, PFN1, LHX1, DRAP1, LHX2, LHX3, LHX4, LHX6, NKX2-2, KLF6, UTF1, ZNF624, TCF7, MAP2K1, SMAD5, L3MBTL, CELSR2, TFCP2, KLF15, ZSCAN2, SHOX2, NOTCH1, YY1AP1, ZNF211, ETS2, MLX, DLX5, ZNF213, DLX4, NCOR1, TCF12, TCF15, RERE, BMP6, E…	1424	1773	13528	1.29131	0.0399591	0.00135839	0.0186446
GOTERM_BP_FAT	GO:0042325~regulation of phosphorylation	80	4.64037	1.11027e-05	CCNT2, ADCY4, ADCY1, IL6ST, GDF7, EFNA1, PDGFA, PKMYT1, PRDX2, PDCD4, PTEN, IL11, AKT1, EDNRB, SPRY2, APP, CDKN2A, MCM7, CDKN2B, MAP3K9, CHRFAM7A, SYK, EGFR, PRKCA, RBL1, HERC5, TNFRSF14, RB1, PKIA, PRKCD, IRS1, CDK5, OSM, ACVR2A, CCND1, ADRB2, TNFRSF10B, EREG, CCND2, JUN, CD81, MAP3K10, IL12A, GADD45B, TRAF2, CAV1, CCK, CDK5R2, ENPP1, PFKFB2, ERBB2, DRD4, BMPR2, KITLG, DUSP12, PIN1, KRAS, DGKE, …	1424	466	13528	1.6309	0.0442037	0.00145734	0.0206703
GOTERM_BP_FAT	GO:0010941~regulation of cell death	125	7.25058	1.16463e-05	SNCB, TUBB2C, CBX4, JAG2, CITED2, APP, CDKN2A, CD44, TIAM1, TPT1, PIK3CA, MX1, WWOX, RAB27A, EGFR, SOCS2, PTPRF, DFFA, BARHL1, HRK, ACTN1, FADD, POLB, CD38, RASGRF1, TIAL1, TXNDC5, JUN, HSPB1, TNFAIP3, UBA52, NMNAT1, HMGB1, TRAF2, MCL1, ERBB2, CLU, STK17B, HSPA1A, STK17A, SLC11A2, SERINC3, KRAS, MTCH1, RAC1, LHX4, DIABLO, HSPE1, BMF, RUNX3, HELLS, GRIN1, ITGA1, BRCA2, TRIO, CIDEA, WRN, VAV2, PPIF…	1424	815	13528	1.45706	0.046317	0.0014809	0.0216822
GOTERM_BP_FAT	GO:0000904~cell morphogenesis involved in differentiation	49	2.84223	1.3305e-05	NRP1, GDF7, PAX6, CNP, PAX2, CXCL12, APP, UNC5B, UNC5A, POU4F2, SEMA3B, PRKCA, NODAL, VAX1, CDK5, SLIT1, SLIT2, VASP, CNTN2, EFNA5, NGFR, UBA52, C1ORF187, RAB3A, CCK, ERBB2, MYCBP2, ALCAM, BCL2, LHX2, BAI1, RAC1, LHX4, RUNX3, ETV4, FN1, DPYSL5, RTN4R, CELSR2, SOD1, NTN1, EPHA4, NOTCH1, EPHA7, SEMA6C, DLX5, CYFIP1, ANTXR1, APBB1	1424	244	13528	1.90779	0.0527367	0.00164042	0.0247699
GOTERM_BP_FAT	GO:0042127~regulation of cell proliferation	121	7.01856	1.45801e-05	FGF18, IL6ST, PDGFA, JAG2, VIPR1, IL11, WNT2, CTTNBP2, CDKN2A, DDX11, CDKN2B, MYOCD, GATA4, ASPH, SYK, EGFR, CGRRF1, CAPNS1, PTPRF, NODAL, TBRG4, MFGE8, TNFRSF14, VAX1, IRS1, CD38, JUN, EIF2AK2, CAV2, DERL2, FGFR4, CAV1, ERBB4, STK11, ERBB2, SOX2, CLU, ST8SIA1, BMPR2, IFI30, ITGB1, PIN1, T, KRAS, LHX1, BAI1, RUNX3, CRIP2, TGFBR2, WDR6, CD276, BRCA2, ITGA2, NTN1, KDR, CDKN1C, TMEM115, NOTCH1, CDKN…	1424	787	13528	1.46061	0.0576427	0.00174468	0.0271436
GOTERM_BP_FAT	GO:0007346~regulation of mitotic cell cycle	35	2.03016	1.53516e-05	CAV2, PKMYT1, ASNS, ANLN, CDC16, MYCBP2, PIN1, TRIAP1, APP, CDKN2A, CDKN2B, BCL2, NPM2, FBXO5, AATF, E4F1, TPR, ZW10, DLG1, EGFR, CYP1A1, L3MBTL, BRCA2, NEUROG1, IGF2, BIRC5, RB1, PKIA, CDK2, CCND1, EREG, BTG4, BUB1B, FOXC1, APBB1	1424	152	13528	2.1875	0.0605983	0.00178447	0.0285796
GOTERM_BP_FAT	GO:0006261~DNA-dependent DNA replication	19	1.10209	1.64121e-05	HMGB1, POLG, RNASEH1, BRCA2, POLB, CDC34, WRN, MCM2, MCM4, ORC1L, MCM6, PURA, TFAM, RPA2, MCM7, POLD2, ORC5L, FEN1, REV3L	1424	58	13528	3.11207	0.0646464	0.00185468	0.0305536
GOTERM_BP_FAT	GO:0001764~neuron migration	20	1.16009	1.95495e-05	CAV2, CCK, SOX1, BARHL1, PAX6, VAX1, PRKG1, CXCL12, YWHAE, NTN1, CDK5, PEX7, WNT2, ASCL1, CTTNBP2, CNTN2, TLX3, NR2F2, APBB1, TWIST1	1424	64	13528	2.96875	0.0765201	0.00214921	0.0363933
GOTERM_BP_FAT	GO:0035295~tube development	45	2.61021	1.96604e-05	CAV2, RAB3A, FGF18, FGFR4, NRP1, FOXA2, BBS7, PDGFA, LMO4, TBX20, BMPR2, PAX2, GREM1, CXCL12, ZIC2, WNT2, T, CTTNBP2, SPRY2, ALDH1A2, PFN1, WNT4, CD44, LHX1, DHCR7, BCL2, GATA4, HHIP, TWIST1, SIM2, DVL2, PDPN, NODAL, TGFBR2, NR4A3, SLIT2, VASP, KDR, MYCN, MAN2A1, NOTCH1, SP3, SIX1, FOXC2, FOXC1	1424	220	13528	1.94318	0.0769371	0.00210457	0.0365998
GOTERM_BP_FAT	GO:0051254~positive regulation of RNA metabolic process	81	4.69838	2.03581e-05	MYOD1, EVX1, FOXA2, THRB, MITF, TBX20, PAX6, NFKB1, PAX2, CBFB, HOXD10, IL11, CITED2, WNT1, APP, BARX2, MYOCD, ZNF148, GATA4, GTF2A2, POU4F2, YAP1, NR2F2, ALX4, EGR1, MYO6, NODAL, SIX3, RB1, ARNTL, SIX4, ELL3, SCAP, OSM, ASCL1, ADRB2, JUN, SIX1, USP21, VGLL2, FOXC2, FOXC1, PIAS1, ABLIM3, CRTC1, SOX2, SOX5, NFYB, NFYA, PRDM16, TCF7L1, T, NPAS2, MRPL12, AATF, NFATC2, NKX2-2, FOXD3, KLF6, FOXL2, UTF…	1424	481	13528	1.59979	0.079556	0.00212336	0.0378984
GOTERM_BP_FAT	GO:0010629~negative regulation of gene expression	84	4.87239	2.06297e-05	EIF2C1, THRB, ARID4A, E2F6, TSG101, TBX20, HR, CBX4, CBX3, NFKB1, PAX2, PDCD4, CITED2, SAP30, PCGF2, BARX2, HEY1, WWP2, ZNF148, NKX6-2, POU4F2, OLIG2, LRRFIP1, NR2F2, KCNQ1, DEDD2, MYST3, NFX1, TWIST1, KHDRBS1, EGR1, CTBP2, ZCCHC11, SOX14, NODAL, GABPA, RBL1, ZHX1, SIX3, HRK, ZNF8, UBE2I, RB1, SPEN, VAX1, PKIA, PURB, PURA, COBRA1, EREG, NAB2, MAP3K10, RASD1, ZMYND11, BTAF1, HMGB1, SOX2, PRDM16, T…	1424	504	13528	1.58333	0.0805733	0.00209792	0.0384039
GOTERM_BP_FAT	GO:0016481~negative regulation of transcription	78	4.52436	2.15102e-05	THRB, ARID4A, E2F6, TSG101, TBX20, HR, CBX4, CBX3, NFKB1, PAX2, PDCD4, CITED2, SAP30, PCGF2, BARX2, HEY1, ZNF148, NKX6-2, POU4F2, LRRFIP1, OLIG2, NR2F2, DEDD2, MYST3, NFX1, TWIST1, KHDRBS1, EGR1, CTBP2, SOX14, NODAL, GABPA, RBL1, ZHX1, SIX3, ZNF8, UBE2I, RB1, SPEN, VAX1, PKIA, PURB, PURA, COBRA1, EREG, NAB2, MAP3K10, RASD1, ZMYND11, BTAF1, HMGB1, SOX2, PRDM16, TCF7L1, DRAP1, OVOL1, PER1, SKIL, HE…	1424	459	13528	1.61438	0.0838641	0.00213408	0.0400428
GOTERM_BP_FAT	GO:0009968~negative regulation of signal transduction	45	2.61021	2.21021e-05	CAV1, ENPP1, IL6ST, SOX2, EZH2, LEMD3, PRDX2, CXXC4, PRDM16, GREM1, PTEN, PIN1, AKT1, RGS10, WNT4, SOX17, HHIP, SKIL, WWOX, PRKCA, PLD2, PTPRF, SOCS2, SIX3, SOCS6, CIDEA, CYP26A1, RGS17, SIRT1, IRS1, PRKCD, BRAP, RGS9BP, DDIT4, ATXN1, MFN2, ADRB2, CCND1, DKK1, BMPER, GSK3A, NGFR, MAPK8IP1, TNFAIP3, NCOR1	1424	221	13528	1.93439	0.0860697	0.00214059	0.0411444
GOTERM_BP_FAT	GO:0045944~positive regulation of transcription from RNA polymerase II promoter	66	3.82831	2.36255e-05	MYOD1, EVX1, FOXA2, THRB, MITF, PAX6, NFKB1, PAX2, CBFB, HOXD10, IL11, CITED2, APP, BARX2, MYOCD, ZNF148, GATA4, GTF2A2, POU4F2, YAP1, ALX4, EGR1, MYO6, NODAL, SIX3, RB1, ARNTL, SIX4, ELL3, SCAP, OSM, ASCL1, ADRB2, JUN, SIX1, FOXC2, VGLL2, FOXC1, ABLIM3, CRTC1, SOX2, SOX5, NFYA, TCF7L1, T, NPAS2, AATF, NFATC2, NKX2-2, FOXD3, KLF6, FOXL2, UTF1, CEBPB, MAFB, SMAD5, GRIN1, TBX1, NEUROG3, NR4A3, ATXN…	1424	371	13528	1.69003	0.0917215	0.00223481	0.0439797
GOTERM_BP_FAT	GO:0010557~positive regulation of macromolecule biosynthetic process	103	5.97448	2.6103e-05	MYOD1, THRB, PDGFA, GDF7, CBFB, HOXD10, IL11, CITED2, WNT1, APP, BRPF1, MYOCD, GATA4, MYST3, SYK, EIF2B5, MYO6, NODAL, SIX3, SIX4, ARNTL, ELL3, IRS1, ASCL1, JUN, SIX1, VGLL2, PIAS1, UBA52, CRTC1, SOX2, SOX5, T, NPM2, NKX2-2, KLF6, UTF1, MAFB, GRIN1, SMAD5, CD276, ITGA2, NR4A3, KLF15, NEUROG3, NOTCH1, ETS2, DYRK1B, GLMN, BMP6, ACVRL1, EVX1, FOXA2, TBX20, MITF, PAX6, NFKB1, PAX2, FEV, AKT1, BARX2, …	1424	654	13528	1.49618	0.100839	0.00241283	0.0485905
GOTERM_BP_FAT	GO:0045893~positive regulation of transcription, DNA-dependent	80	4.64037	2.65642e-05	MYOD1, EVX1, FOXA2, THRB, MITF, TBX20, PAX6, NFKB1, PAX2, CBFB, HOXD10, IL11, CITED2, WNT1, APP, BARX2, MYOCD, ZNF148, GATA4, GTF2A2, POU4F2, YAP1, NR2F2, ALX4, EGR1, MYO6, NODAL, SIX3, RB1, ARNTL, SIX4, ELL3, SCAP, OSM, ASCL1, ADRB2, JUN, SIX1, USP21, VGLL2, FOXC2, FOXC1, PIAS1, ABLIM3, CRTC1, SOX2, SOX5, NFYB, NFYA, PRDM16, TCF7L1, T, NPAS2, MRPL12, AATF, NFATC2, NKX2-2, FOXD3, KLF6, FOXL2, UTF…	1424	477	13528	1.59329	0.102526	0.00240091	0.0494488
GOTERM_BP_FAT	GO:0051172~negative regulation of nitrogen compound metabolic process	85	4.93039	3.51463e-05	THRB, ARID4A, E2F6, TSG101, TBX20, HR, CBX4, CBX3, NFKB1, PAX2, PDCD4, CITED2, SAP30, PCGF2, HTR1B, BARX2, HEY1, ZNF148, NKX6-2, POU4F2, OLIG2, LRRFIP1, NR2F2, DEDD2, MYST3, NFX1, TWIST1, EGR1, KHDRBS1, CTBP2, SOX14, NODAL, GABPA, RBL1, ZHX1, SIX3, ZNF8, UBE2I, RB1, SPEN, VAX1, PKIA, PURB, PURA, COBRA1, EREG, NAB2, MAP3K10, RASD1, ZMYND11, BTAF1, HMGB1, CAV1, SOX2, DRD4, PRDM16, TCF7L1, DRAP1, OV…	1424	519	13528	1.55588	0.133349	0.00310643	0.0654194
GOTERM_BP_FAT	GO:0045934~negative regulation of nucleobase, nucleoside, nucleotide and nucleic acid metabolic process	84	4.87239	3.69015e-05	THRB, ARID4A, E2F6, TSG101, TBX20, HR, CBX4, CBX3, NFKB1, PAX2, PDCD4, CITED2, SAP30, PCGF2, HTR1B, BARX2, HEY1, ZNF148, NKX6-2, POU4F2, OLIG2, LRRFIP1, NR2F2, DEDD2, MYST3, NFX1, TWIST1, EGR1, KHDRBS1, CTBP2, SOX14, NODAL, GABPA, RBL1, ZHX1, SIX3, ZNF8, UBE2I, RB1, SPEN, VAX1, PKIA, PURB, PURA, COBRA1, EREG, NAB2, MAP3K10, RASD1, ZMYND11, BTAF1, HMGB1, SOX2, DRD4, PRDM16, TCF7L1, DRAP1, OVOL1, P…	1424	512	13528	1.55859	0.13952	0.00319203	0.0686852
GOTERM_BP_FAT	GO:0051173~positive regulation of nitrogen compound metabolic process	101	5.85847	3.73418e-05	MYOD1, THRB, PDGFA, GDF7, CBFB, HOXD10, IL11, CITED2, WNT1, APP, BRPF1, MYOCD, GATA4, DDAH1, MYST3, EGFR, MYO6, NODAL, SIX3, SIX4, ARNTL, ELL3, ASCL1, JUN, SIX1, VGLL2, PIAS1, UBA52, CRTC1, SOX2, SOX5, T, NPM2, NKX2-2, KLF6, UTF1, MAP2K1, MAFB, GRIN1, SMAD5, NR4A3, KLF15, NEUROG3, NOTCH1, ETS2, DYRK1B, BMP6, ACVRL1, FOXA2, EVX1, TBX20, MITF, PAX6, NFKB1, PAX2, FEV, AKT1, BARX2, ZNF148, GTF2A2, PO…	1424	644	13528	1.48991	0.141062	0.00316288	0.0695046
GOTERM_BP_FAT	GO:0009792~embryonic development ending in birth or egg hatching	60	3.48028	4.3192e-05	ACVRL1, EVX1, FOXA2, LMO4, PAX6, HOXD10, CITED2, ZIC2, WNT1, PCGF2, GATA4, ALX4, TWIST1, CYP1A1, NODAL, GABPA, DLL1, SIX4, VASP, ASCL2, MFN2, ACVR2A, MAN2A1, SIX1, NLE1, ROR2, PYGO2, FOXC2, FOXC1, GNAS, COL1A1, ADD1, ELL, CDH1, ITGB1, PRPF19, T, PFN1, ALDH1A2, DAD1, BTF3, ETNK2, TERF2, FOXD3, DVL2, MAFF, WDTC1, CEBPB, MYO1E, TGFBR2, HSPG2, BRCA2, TBX1, HOXB4, TJP1, PLCG1, SFRP2, SP3, PHGDH, TCF15	1424	334	13528	1.70659	0.161283	0.00358298	0.0803894
GOTERM_BP_FAT	GO:0010648~negative regulation of cell communication	48	2.78422	4.38982e-05	CAV1, ENPP1, IL6ST, GRIK3, SOX2, EZH2, LEMD3, PRDX2, CXXC4, PRDM16, GREM1, PTEN, PIN1, AKT1, RGS10, HTR1B, WNT4, SOX17, HHIP, SKIL, WWOX, PRKCA, PLD2, PTPRF, SOCS2, SIX3, SOCS6, CIDEA, CYP26A1, RGS17, SIRT1, IRS1, PRKCD, BRAP, RGS9BP, DDIT4, MFN2, ATXN1, CD38, ADRB2, CCND1, DKK1, BMPER, GSK3A, NGFR, MAPK8IP1, TNFAIP3, NCOR1	1424	248	13528	1.83871	0.163691	0.00356877	0.0817034
GOTERM_BP_FAT	GO:0045935~positive regulation of nucleobase, nucleoside, nucleotide and nucleic acid metabolic process	98	5.68445	4.72902e-05	MYOD1, THRB, PDGFA, GDF7, CBFB, HOXD10, IL11, CITED2, WNT1, APP, BRPF1, MYOCD, GATA4, MYST3, MYO6, NODAL, SIX3, SIX4, ARNTL, ELL3, ASCL1, JUN, SIX1, VGLL2, PIAS1, UBA52, CRTC1, SOX2, SOX5, T, NPM2, NKX2-2, KLF6, UTF1, MAP2K1, MAFB, GRIN1, SMAD5, NR4A3, KLF15, NEUROG3, NOTCH1, ETS2, DYRK1B, BMP6, ACVRL1, FOXA2, EVX1, TBX20, MITF, PAX6, NFKB1, PAX2, FEV, BARX2, ZNF148, GTF2A2, POU4F2, YAP1, ALX4, N…	1424	624	13528	1.49199	0.175164	0.00376877	0.088014
GOTERM_BP_FAT	GO:0051094~positive regulation of developmental process	52	3.01624	5.18001e-05	MYOD1, PDLIM7, FOXA2, THRB, IL6ST, PAX6, NFKB1, ACTR3, AKT1, CDKN2B, TIAM1, NKX6-2, IL4R, GATA4, POU4F2, CHRFAM7A, BOC, DDAH1, SYK, AP3B1, PRKCA, PTPRF, RB1, SLIT2, CD83, ACVR2A, ADRB2, JUN, GNAS, NGFR, SOX2, CLU, BMPR2, KITLG, OXTR, PRPF19, BCL2, NKX2-2, LPL, MAP2K1, SMAD5, TGFBR2, CD276, IGF2, NEUROG3, NTN1, NTRK3, NOTCH1, WNT7B, DLX5, TOB2, BMP6	1424	278	13528	1.77698	0.190174	0.00404823	0.0964037
GOTERM_BP_FAT	GO:0010033~response to organic substance	110	6.38051	5.22864e-05	ADCY4, ADCY1, IL6ST, PDGFA, SLC6A3, WNT2, GNG8, SLC2A8, CTTNBP2, EIF4EBP1, HTR1B, CD44, CDKN2B, CHRNA4, EIF2B5, EGFR, CYP1A1, SOCS2, COLEC12, MFGE8, CDO1, IRS1, CD38, GLUL, THBD, JUN, HSPB1, COL1A1, EIF2AK2, CAV2, DERL2, CAV1, ENPP1, ERBB4, MCL1, ERBB2, PFKFB2, DRD4, HMGCS1, ACP2, HSPA1A, TRH, KRAS, HSPE1, MAP2K1, GRIN1, TGFBR2, GGH, BRCA2, ITGA2, NR4A3, EPS8, KCNJ8, CXCL16, PDCD7, TACR1, PRDX2, …	1424	721	13528	1.44938	0.191776	0.00400922	0.0973083
GOTERM_BP_FAT	GO:0048870~cell motility	56	3.24826	5.27406e-05	PVR, SLC22A16, NEURL, NRP1, ACVRL1, WASF2, PAX6, PRKG1, PTEN, CXCL12, PEX7, WNT2, WNT1, CTTNBP2, EDNRB, CD44, NR2F2, SYK, TWIST1, PRKCA, BARHL1, NODAL, VAX1, SIX4, CDK5, SLIT2, ASCL1, NCK1, SIX1, IL12A, CNTN2, SDCBP, FOXC1, CAV2, CCK, SOX1, KITLG, ABI2, CDH2, ITGB1, DOCK2, CKLF, RAC1, LHX6, TLX3, FN1, ITGA1, TBX1, VAV2, YWHAE, NTN1, KDR, CDH13, CXCL16, FOXE1, APBB1	1424	307	13528	1.7329	0.193269	0.00396924	0.0981533
GOTERM_BP_FAT	GO:0051674~localization of cell	56	3.24826	5.27406e-05	PVR, SLC22A16, NEURL, NRP1, ACVRL1, WASF2, PAX6, PRKG1, PTEN, CXCL12, PEX7, WNT2, WNT1, CTTNBP2, EDNRB, CD44, NR2F2, SYK, TWIST1, PRKCA, BARHL1, NODAL, VAX1, SIX4, CDK5, SLIT2, ASCL1, NCK1, SIX1, IL12A, CNTN2, SDCBP, FOXC1, CAV2, CCK, SOX1, KITLG, ABI2, CDH2, ITGB1, DOCK2, CKLF, RAC1, LHX6, TLX3, FN1, ITGA1, TBX1, VAV2, YWHAE, NTN1, KDR, CDH13, CXCL16, FOXE1, APBB1	1424	307	13528	1.7329	0.193269	0.00396924	0.0981533
GOTERM_BP_FAT	GO:0045941~positive regulation of transcription	90	5.22042	5.42986e-05	MYOD1, ACVRL1, EVX1, THRB, FOXA2, GDF7, MITF, TBX20, PAX6, NFKB1, PAX2, CBFB, HOXD10, IL11, FEV, CITED2, WNT1, APP, BRPF1, BARX2, MYOCD, ZNF148, GTF2A2, GATA4, POU4F2, YAP1, NR2F2, ALX4, MYST3, EGR1, MYO6, NODAL, PTF1A, SIX3, RB1, ARNTL, SIX4, ELL3, CDK2, SCAP, OSM, ASCL1, ADRB2, JUN, SIX1, USP21, VGLL2, FOXC2, FOXC1, PIAS1, UBA52, ABLIM3, CRTC1, SOX2, SOX5, NFYB, NFYA, PRDM16, TCF7L1, T, NPAS2, …	1424	564	13528	1.51596	0.198371	0.00401211	0.101051
GOTERM_BP_FAT	GO:0048663~neuron fate commitment	15	0.87007	5.87663e-05	FOXA2, EVX1, PTF1A, SOX2, PAX6, JAG2, HOXD10, ASCL1, WNT1, NOTCH1, NKX6-2, LHX6, OLIG2, TLX3, NKX2-2	1424	42	13528	3.39286	0.212824	0.00426415	0.109361
GOTERM_BP_FAT	GO:0010628~positive regulation of gene expression	92	5.33643	5.9648e-05	MYOD1, ACVRL1, EVX1, THRB, FOXA2, GDF7, MITF, TBX20, PAX6, NFKB1, PAX2, CBFB, HOXD10, IL11, FEV, CITED2, WNT1, APP, BRPF1, BARX2, MYOCD, ZNF148, GTF2A2, GATA4, POU4F2, YAP1, NR2F2, ALX4, MYST3, EGR1, MYO6, NODAL, PTF1A, SIX3, RB1, ARNTL, SIX4, ELL3, CDK2, SCAP, OSM, ASCL1, ADRB2, JUN, SIX1, USP21, VGLL2, FOXC2, FOXC1, PIAS1, UBA52, RAG1AP1, ABLIM3, CRTC1, SOX2, SOX5, NFYB, NFYA, PRDM16, TCF7L1, T…	1424	581	13528	1.5043	0.215645	0.00425223	0.111001
GOTERM_BP_FAT	GO:0016265~death	110	6.38051	6.25791e-05	SHF, APP, RAD21, CDKN2A, UNC5B, TIAM1, UNC5A, CIB1, TWIST1, MAGI3, DFFA, HRK, TBRG4, FADD, POLB, TNFRSF14, DDIT4, RASGRF1, TIAL1, HSPB8, JUN, HSPB1, TNFAIP3, EIF2AK2, UBA52, TRAF2, MCL1, CLU, STK17B, STK17A, GREM1, SLC11A2, KRAS, MTCH1, RAC1, DIABLO, HSPE1, DDX41, BMF, TREX1, TRIO, CIDEA, NIPA1, VAV2, NTN1, CDKN1B, PARP4, PDCD5, PDCD7, TCF15, STEAP3, E2F2, FOSL2, NUAK2, SGPP1, PDIA2, FASTK, NFKB1…	1424	724	13528	1.44337	0.224952	0.00438399	0.116453
GOTERM_BP_FAT	GO:0031328~positive regulation of cellular biosynthetic process	105	6.09049	6.7036e-05	MYOD1, THRB, PDGFA, GDF7, CBFB, HOXD10, IL11, CITED2, WNT1, APP, BRPF1, MYOCD, GATA4, DDAH1, MYST3, SYK, EIF2B5, EGFR, MYO6, NODAL, SIX3, SIX4, ARNTL, ELL3, IRS1, ASCL1, JUN, SIX1, VGLL2, PIAS1, UBA52, CRTC1, SOX2, SOX5, T, NPM2, NKX2-2, KLF6, UTF1, MAFB, GRIN1, SMAD5, CD276, ITGA2, NR4A3, KLF15, NEUROG3, NOTCH1, ETS2, DYRK1B, GLMN, BMP6, ACVRL1, EVX1, FOXA2, TBX20, MITF, PAX6, NFKB1, PAX2, FEV, …	1424	685	13528	1.4562	0.238892	0.00461609	0.124742
GOTERM_BP_FAT	GO:0009891~positive regulation of biosynthetic process	106	6.14849	7.44734e-05	MYOD1, THRB, PDGFA, GDF7, CBFB, HOXD10, IL11, CITED2, WNT1, APP, BRPF1, MYOCD, GATA4, DDAH1, MYST3, SYK, EIF2B5, EGFR, MYO6, NODAL, SIX3, ARNTL, SIX4, ELL3, IRS1, ASCL1, JUN, SIX1, VGLL2, PIAS1, UBA52, CRTC1, SOX2, SOX5, T, NPM2, NKX2-2, KLF6, UTF1, MAFB, GRIN1, SMAD5, CD276, ITGA2, NR4A3, KLF15, NEUROG3, NOTCH1, ETS2, DYRK1B, GLMN, BMP6, ACVRL1, EVX1, FOXA2, TBX20, MITF, PAX6, NFKB1, PAX2, FEV, …	1424	695	13528	1.44892	0.261598	0.0050417	0.138573
GOTERM_BP_FAT	GO:0006351~transcription, DNA-dependent	53	3.07425	9.7957e-05	CCNT2, E2F2, THRB, ARID4A, LMO4, TCOF1, NFKB1, PAX2, CBFB, FEV, MAX, GTF2E2, CDKN2A, GTF2A1, HSF2, GATA4, GTF2A2, NFX1, PTGER3, SNAPC3, GABPA, TAF6L, ELL3, MSC, MED4, TAF12, EREG, GTF2I, ASH1L, MYNN, XRN2, POLR2G, ELL, BMPR2, SOX5, NFYA, IVNS1ABP, TFAM, TCERG1, MRPL12, POU2F2, ECD, GTF3C5, BTF3, SKIL, GTF3C2, APEX1, RUNX3, MAFF, CEBPB, DTX1, IRF7, NCOR1	1424	292	13528	1.72432	0.328943	0.00651802	0.182231
GOTERM_BP_FAT	GO:0006470~protein amino acid dephosphorylation	30	1.74014	0.000102786	PPP6C, PPP2R3A, PDP2, CDC14A, CDC14B, STYX, PTPN23, DUSP12, PPM1B, PTEN, DUSP14, BCL2, DULLARD, PTPRF, PTPRG, PTPN4, DUSP23, PTPN14, PPP1CC, PTPRO, CDC25A, CDC25B, DUSP5, PPM1G, PPM1D, EYA2, PPM1E, DUSP1, PPM1K, PPM1M	1424	133	13528	2.14286	0.34201	0.00672833	0.191206
GOTERM_BP_FAT	GO:0010564~regulation of cell cycle process	27	1.56613	0.000105938	XPO1, DYNC1LI1, CAV2, PKMYT1, ANLN, CDC16, PIN1, MYCBP2, TRIAP1, CDKN2A, NPM2, FBXO5, TPR, ZW10, CDC7, CYP1A1, L3MBTL, BRCA2, NEUROG1, PDE3A, BIRC5, IGF2, RB1, PKIA, OSM, EREG, APBB1	1424	114	13528	2.25	0.350401	0.00682424	0.197063
GOTERM_BP_FAT	GO:0031401~positive regulation of protein modification process	38	2.20418	0.000110546	CAV1, CCK, GDF7, IL6ST, BMPR2, KITLG, CDC16, IL11, PIN1, EDNRB, PSMB6, BCL2, PSMD2, FBXO5, SYK, PRKCA, ANAPC5, IGF2, TNFRSF14, PSMB9, OSM, ACVR2A, PSMA1, PSMD14, PSMC6, CCND1, PSME1, CCND2, PSME2, PSMD11, PLK1, PSMA4, PSMA3, CD81, IL12A, TNK2, PIAS1, UBA52	1424	187	13528	1.93048	0.36248	0.00700922	0.205628
GOTERM_BP_FAT	GO:0045597~positive regulation of cell differentiation	44	2.5522	0.000113525	PDLIM7, THRB, FOXA2, IL6ST, SOX2, CLU, PAX6, BMPR2, KITLG, NFKB1, PRPF19, AKT1, ACTR3, CDKN2B, TIAM1, IL4R, BCL2, NKX6-2, POU4F2, BOC, NKX2-2, SYK, AP3B1, LPL, MAP2K1, PTPRF, TGFBR2, SMAD5, CD276, IGF2, RB1, NEUROG3, NTN1, SLIT2, NTRK3, ACVR2A, CD83, WNT7B, NOTCH1, JUN, DLX5, GNAS, NGFR, BMP6	1424	229	13528	1.82533	0.370166	0.00708706	0.211163
GOTERM_BP_FAT	GO:0007423~sensory organ development	44	2.5522	0.000113525	IRX5, SOX1, PDGFA, ERBB2, SOX2, MITF, JAG2, PAX6, ABI2, PAX2, SPRY2, WNT1, ALDH1A2, BCL2, POU4F2, EGFR, FOXL2, RAX, MYO6, CYP1A1, MAFB, PTF1A, RING1, SIX3, NEUROG1, TBX1, DLL1, VAX1, SIX4, NR4A3, SOD1, MFN2, ASCL1, DDR1, CDKN1B, PKNOX1, SP3, DLX5, SIX1, FOXC2, PYGO2, FOXC1, MAB21L1, TCF15	1424	229	13528	1.82533	0.370166	0.00708706	0.211163
GOTERM_BP_FAT	GO:0008219~cell death	108	6.2645	0.000118193	SHF, APP, RAD21, CDKN2A, UNC5B, TIAM1, UNC5A, CIB1, TWIST1, MAGI3, DFFA, HRK, TBRG4, FADD, POLB, TNFRSF14, DDIT4, RASGRF1, TIAL1, HSPB8, JUN, HSPB1, TNFAIP3, EIF2AK2, UBA52, TRAF2, MCL1, CLU, STK17B, STK17A, GREM1, SLC11A2, KRAS, RAC1, MTCH1, DIABLO, HSPE1, DDX41, BMF, TREX1, TRIO, CIDEA, NIPA1, VAV2, NTN1, CDKN1B, PARP4, PDCD5, PDCD7, STEAP3, E2F2, FOSL2, NUAK2, SGPP1, PDIA2, FASTK, NFKB1, PDCD4…	1424	719	13528	1.42698	0.382028	0.00726608	0.219838
GOTERM_BP_FAT	GO:0043009~chordate embryonic development	58	3.36427	0.000119728	ACVRL1, FOXA2, LMO4, PAX6, HOXD10, CITED2, ZIC2, WNT1, PCGF2, GATA4, ALX4, TWIST1, NODAL, GABPA, DLL1, SIX4, VASP, ASCL2, MFN2, ACVR2A, MAN2A1, SIX1, NLE1, ROR2, PYGO2, FOXC2, FOXC1, GNAS, COL1A1, ADD1, ELL, CDH1, ITGB1, PRPF19, T, PFN1, ALDH1A2, DAD1, BTF3, ETNK2, TERF2, FOXD3, DVL2, MAFF, WDTC1, CEBPB, MYO1E, TGFBR2, HSPG2, BRCA2, TBX1, HOXB4, TJP1, PLCG1, SFRP2, SP3, PHGDH, TCF15	1424	331	13528	1.66465	0.385879	0.00725065	0.22269
GOTERM_BP_FAT	GO:0006350~transcription	271	15.7193	0.000120943	EIF2C1, ZNF250, HOXD10, CITED2, BRPF1, CRY2, SFRS8, ZNF248, TWIST1, PHOX2A, ZNF507, BARHL1, ZHX1, TAF6L, SUV420H2, UHRF1, C1ORF83, JUN, ZZZ3, VGLL2, PIAS1, ELL, CRTC1, ZNF76, MYBL1, ZNF512, T, LHX1, DRAP1, LHX2, LHX3, CASZ1, LHX4, LHX6, PLAG1, KLF6, UTF1, TCF7, ZNF624, SMAD5, L3MBTL, TFCP2, KLF15, ZNF497, ZSCAN2, NOTCH1, SAP130, ZNF211, MLX, ZNF213, NCOR1, TCF12, RERE, TCF15, KLF3, CCNT2, FOXA2, …	1424	2101	13528	1.22537	0.38891	0.00721663	0.224947
GOTERM_BP_FAT	GO:0016311~dephosphorylation	33	1.91415	0.000121948	PPP6C, PPP2R3A, PDP2, CDC14A, CDC14B, STYX, PTPN23, DUSP12, PPM1B, PTEN, DUSP14, BCL2, SYNJ2, DULLARD, NT5C, PTPRF, PTPRG, PTPN4, PTPN14, DUSP23, PPP1CC, PTPRO, CDC25A, CDC25B, SACM1L, DUSP5, PPM1G, PPM1D, EYA2, PPM1E, DUSP1, PPM1K, PPM1M	1424	154	13528	2.03571	0.391404	0.00717128	0.226813
GOTERM_BP_FAT	GO:0006793~phosphorus metabolic process	139	8.06265	0.000122847	MYOD1, PRPF4B, PDP2, GDF7, EFNA1, STYX, PTPN23, PKMYT1, CLK1, PRKG1, WNT2, CTTNBP2, APP, PSKH1, CLK2, MAP3K9, MOS, PIK3CA, TLK1, MAP2K7, SYK, EGFR, PTPRF, STK25, PTPRG, WNK2, PPP1CC, PTPRO, MAP4K3, MAP4K4, MAPK6, RIOK3, ROR2, EIF2AK2, CAV2, FGFR4, PPP2R3A, ENPP1, ERBB4, STK11, STK10, ERBB2, DRD4, STK17B, BMPR2, DUSP12, STK17A, DUSP14, DULLARD, ADRA2C, MAP2K1, PTPN4, TGFBR2, DUSP23, PTPN14, ITGA1,…	1424	973	13528	1.35714	0.39363	0.00712117	0.228485
GOTERM_BP_FAT	GO:0006796~phosphate metabolic process	139	8.06265	0.000122847	MYOD1, PRPF4B, PDP2, GDF7, EFNA1, STYX, PTPN23, PKMYT1, CLK1, PRKG1, WNT2, CTTNBP2, APP, PSKH1, CLK2, MAP3K9, MOS, PIK3CA, TLK1, MAP2K7, SYK, EGFR, PTPRF, STK25, PTPRG, WNK2, PPP1CC, PTPRO, MAP4K3, MAP4K4, MAPK6, RIOK3, ROR2, EIF2AK2, CAV2, FGFR4, PPP2R3A, ENPP1, ERBB4, STK11, STK10, ERBB2, DRD4, STK17B, BMPR2, DUSP12, STK17A, DUSP14, DULLARD, ADRA2C, MAP2K1, PTPN4, TGFBR2, DUSP23, PTPN14, ITGA1,…	1424	973	13528	1.35714	0.39363	0.00712117	0.228485
GOTERM_BP_FAT	GO:0031399~regulation of protein modification process	53	3.07425	0.000128163	PDGFA, GDF7, IL6ST, CDC16, PDCD4, IL11, EDNRB, CDKN2A, MAP3K9, PSMD2, SYK, PRKCA, EGFR, ANAPC5, TNFRSF14, CDK5, PRKCD, OSM, PSMA1, ACVR2A, CCND1, PSME1, PSME2, CCND2, PSMA4, JUN, CD81, PSMA3, IL12A, MAP3K10, BUB1B, PIAS1, UBA52, CAV1, CCK, ENPP1, BMPR2, KITLG, FEM1A, PIN1, PSMB6, BCL2, FBXO5, TINF2, IGF2, YWHAE, PSMB9, PSMC6, PSMD14, PSMD11, PLK1, TNK2, MAPK8IP1	1424	295	13528	1.70678	0.406616	0.00732394	0.23836
GOTERM_BP_FAT	GO:0051329~interphase of mitotic cell cycle	25	1.45012	0.000135335	PPP6C, E2F6, CDC34, ITGB1, AKT1, APP, CDKN2A, DDX11, CDKN2B, BCL2, EGFR, CDC7, KHDRBS1, ANAPC5, TBRG4, BIRC5, RB1, CDK2, CDC25A, CDKN1C, PPM1D, CCND1, CDKN1B, CCND2, KPNA2	1424	103	13528	2.30583	0.423697	0.00762524	0.251683
GOTERM_BP_FAT	GO:0008045~motor axon guidance	8	0.464037	0.000135884	ALCAM, ERBB2, LHX4, CDK5, CXCL12, SLIT2, ETV4, MYCBP2	1424	13	13528	5.84615	0.424983	0.00755157	0.252702
GOTERM_BP_FAT	GO:0032774~RNA biosynthetic process	53	3.07425	0.000139974	CCNT2, E2F2, THRB, ARID4A, LMO4, TCOF1, NFKB1, PAX2, CBFB, FEV, MAX, GTF2E2, CDKN2A, GTF2A1, HSF2, GATA4, GTF2A2, NFX1, PTGER3, SNAPC3, GABPA, TAF6L, ELL3, MSC, MED4, TAF12, EREG, GTF2I, ASH1L, MYNN, XRN2, POLR2G, ELL, BMPR2, SOX5, NFYA, IVNS1ABP, TFAM, TCERG1, MRPL12, POU2F2, ECD, GTF3C5, BTF3, SKIL, GTF3C2, APEX1, RUNX3, MAFF, CEBPB, DTX1, IRF7, NCOR1	1424	296	13528	1.70101	0.434483	0.00767331	0.2603
GOTERM_BP_FAT	GO:0045892~negative regulation of transcription, DNA-dependent	61	3.53828	0.000148192	ARID4A, TSG101, E2F6, TBX20, CBX4, CBX3, NFKB1, PAX2, CITED2, SAP30, PCGF2, BARX2, HEY1, ZNF148, NKX6-2, POU4F2, OLIG2, NR2F2, NFX1, TWIST1, EGR1, CTBP2, SOX14, NODAL, GABPA, RBL1, ZHX1, SIX3, ZNF8, UBE2I, RB1, VAX1, SPEN, PKIA, PURB, PURA, RASD1, ZMYND11, HMGB1, SOX2, PRDM16, TCF7L1, DRAP1, OVOL1, SKIL, HELLS, SIM2, FOXD3, WDTC1, ILF3, PHF12, SIRT1, CDKN1C, HOXB4, CDKN1B, IRF7, MLX, FOXE1, PHF21…	1424	356	13528	1.62781	0.453097	0.00801416	0.275562
GOTERM_BP_FAT	GO:0003002~regionalization	39	2.26218	0.000156514	EVX1, FOXA2, TBX20, PAX6, BMPR2, CXXC4, GREM1, HOXD10, TCF7L1, T, WNT1, ALDH1A2, PCGF2, LHX1, NKX6-2, LHX2, GATA4, HHIP, NR2F2, ALX4, DVL2, EMX1, MAFB, NODAL, RING1, SIX3, CYP26A1, DLL1, TBX1, CELSR2, ACVR2A, HOXB4, NOTCH1, BTG2, HIPK1, SFRP2, ROR2, PBX3, TCF15	1424	197	13528	1.88071	0.471322	0.00835145	0.291015
GOTERM_BP_FAT	GO:0043549~regulation of kinase activity	61	3.53828	0.000160654	CCNT2, ADCY4, ADCY1, EFNA1, PKMYT1, PRDX2, PDCD4, PTEN, AKT1, SPRY2, APP, CDKN2A, CDKN2B, MAP3K9, CHRFAM7A, SYK, PRKCA, EGFR, RBL1, HERC5, RB1, IRS1, CDK5, PKIA, CCND1, ADRB2, TNFRSF10B, EREG, CCND2, CD81, MAP3K10, GADD45B, TRAF2, CAV1, CDK5R2, CCK, PFKFB2, ERBB2, DRD4, KITLG, DUSP12, KRAS, DGKE, DGKD, RAC1, ADRA2C, PRKAA1, DGKQ, MAP2K1, TGFBR2, ITGA1, IGF2, SOD1, VAV2, CDC25A, CDC25B, CDKN1C, CD…	1424	357	13528	1.62325	0.480162	0.0084606	0.298703
GOTERM_BP_FAT	GO:0008283~cell proliferation	71	4.11833	0.000198592	CDC14A, PDGFA, TBX20, GFER, PRDX2, CDC16, CLK1, PSPH, CXCL12, PTEN, MCM7, INSIG1, E4F1, HHIP, IFRD2, OCA2, SYK, DLG1, EGFR, KHDRBS1, PDXK, CYP1A1, PDPN, TACC3, PRKCD, CDK5, OSM, ASCL1, ACVR2A, GLUL, IGSF8, UHRF1, UHRF2, EREG, RASGRF1, NAB2, CD81, BUB1B, FOXC2, FOXC1, MAPRE2, ZMYND11, ERBB4, ERBB2, KITLG, FKBP1B, MIF, PRPF19, ANXA7, DOCK2, BCL2, CKLF, RAC1, RUNX3, HELLS, ERF, MAP2K1, CD276, BRCA2,…	1424	436	13528	1.54702	0.554584	0.010315	0.369116
GOTERM_BP_FAT	GO:0051325~interphase	25	1.45012	0.000216368	PPP6C, E2F6, CDC34, ITGB1, AKT1, APP, CDKN2A, DDX11, CDKN2B, BCL2, EGFR, CDC7, KHDRBS1, ANAPC5, TBRG4, BIRC5, RB1, CDK2, CDC25A, CDKN1C, PPM1D, CCND1, CDKN1B, CCND2, KPNA2	1424	106	13528	2.24057	0.585693	0.0110918	0.402094
GOTERM_BP_FAT	GO:0051253~negative regulation of RNA metabolic process	61	3.53828	0.00023573	ARID4A, TSG101, E2F6, TBX20, CBX4, CBX3, NFKB1, PAX2, CITED2, SAP30, PCGF2, BARX2, HEY1, ZNF148, NKX6-2, POU4F2, OLIG2, NR2F2, NFX1, TWIST1, EGR1, CTBP2, SOX14, NODAL, GABPA, RBL1, ZHX1, SIX3, ZNF8, UBE2I, RB1, VAX1, SPEN, PKIA, PURB, PURA, RASD1, ZMYND11, HMGB1, SOX2, PRDM16, TCF7L1, DRAP1, OVOL1, SKIL, HELLS, SIM2, FOXD3, WDTC1, ILF3, PHF12, SIRT1, CDKN1C, HOXB4, CDKN1B, IRF7, MLX, FOXE1, PHF21…	1424	362	13528	1.60083	0.617109	0.0119284	0.438
GOTERM_BP_FAT	GO:0045664~regulation of neuron differentiation	29	1.68213	0.000251172	NRP1, FOXA2, EFNA1, SOX2, PAX6, SOX5, CDH2, ACTR3, PRPF19, TIAM1, BCL2, TLX3, NKX2-2, PTPRF, DTX1, GRIN1, RTN4R, DLL1, NEUROG3, NTN1, SLIT2, NTRK3, ASCL1, NOTCH1, YWHAH, CCND2, SIX1, NGFR, DBN1	1424	133	13528	2.07143	0.64045	0.012549	0.46663
GOTERM_BP_FAT	GO:0016055~Wnt receptor signaling pathway	29	1.68213	0.000251172	MITF, CXXC4, TCF7L1, WNT2, WNT1, WNT4, RSPO2, FRAT1, WNT6, DVL2, FZD8, WNT10A, TCF7, TLE3, FZD1, TLE4, CELSR2, FZD2, SLC9A3R1, CCND1, WNT7B, DKK1, KREMEN2, SFRP2, SFRP4, WNT9B, PYGO2, ROR2, WIF1	1424	133	13528	2.07143	0.64045	0.012549	0.46663
GOTERM_BP_FAT	GO:0021700~developmental maturation	24	1.39211	0.000265502	RAB3A, IRX5, ERBB4, GRIN1, NTN4, BRCA2, PDE3A, KCNIP2, CBFB, KDR, CDC25B, CDKN1C, AKT1, WNT1, NOTCH1, APP, BARX2, EREG, CD44, MTCH1, FBXO5, LHX6, PCSK4, RUNX3	1424	101	13528	2.25743	0.660835	0.0130996	0.49319
GOTERM_BP_FAT	GO:0035239~tube morphogenesis	28	1.62413	0.000272008	NRP1, BBS7, FOXA2, LMO4, TBX20, GREM1, PAX2, CXCL12, ZIC2, T, PFN1, SPRY2, WNT4, CD44, BCL2, GATA4, TWIST1, DVL2, PDPN, NODAL, TGFBR2, NR4A3, VASP, MYCN, KDR, NOTCH1, SIX1, FOXC2	1424	127	13528	2.09449	0.669705	0.0132579	0.505246
GOTERM_BP_FAT	GO:0051338~regulation of transferase activity	62	3.59629	0.000281616	CCNT2, ADCY4, ADCY1, EFNA1, PKMYT1, PRDX2, PDCD4, PTEN, AKT1, SPRY2, APP, CDKN2A, CDKN2B, MAP3K9, CHRFAM7A, SYK, PRKCA, EGFR, RBL1, HERC5, RB1, IRS1, CDK5, PKIA, CCND1, ADRB2, TNFRSF10B, EREG, CCND2, CD81, MAP3K10, GADD45B, TRAF2, CAV1, CDK5R2, CCK, PFKFB2, ERBB2, DRD4, KITLG, DUSP12, KRAS, DGKE, DGKD, RAC1, ADRA2C, PRKAA1, DGKQ, MAP2K1, TGFBR2, ITGA1, IGF2, SOD1, VAV2, CDC25A, CDC25B, CDKN1C, CD…	1424	372	13528	1.58333	0.68238	0.0135608	0.523047
GOTERM_BP_FAT	GO:0007167~enzyme linked receptor protein signaling pathway	58	3.36427	0.000288921	FGF18, NRP1, ACVRL1, IL6ST, PDGFA, EFNA1, GDF7, FSTL1, PTEN, AKT1, SLC2A8, EIF4EBP1, TIAM1, SYK, EGFR, PTPRF, SOCS2, PTPRG, ZNF8, IRS1, CDK5, SS18, ACVR2A, DDR1, ADRB2, EREG, JUN, NCK1, COL1A2, ROR2, FOXC2, FOXC1, TGFBRAP1, FGFR4, ERBB4, ERBB2, BMPR2, MSX2, UBE2D3, DGKD, MYO1E, SMAD5, TGFBR2, TRIO, IGF2, EPHA2, KDR, NTRK3, EPS15, EPHA5, EPHA4, EPHA7, ERBB2IP, EPS8, GSK3A, EPHA8, IGFBP1, BMP6	1424	342	13528	1.61111	0.691692	0.0137476	0.536581
GOTERM_BP_FAT	GO:0032268~regulation of cellular protein metabolic process	75	4.35035	0.000314826	NCBP2, EIF2C1, IL6ST, PDGFA, GDF7, EIF5, NFKB1, CDC16, PDCD4, IL11, AKT1, EDNRB, EIF4EBP1, APP, CDKN2A, MAP3K9, PSMD2, QKI, EIF2B5, SYK, PRKCA, EGFR, ANAPC5, TNFRSF14, PRKCD, CDK5, OSM, EIF4G1, PSMA1, ACVR2A, CCND1, PSME1, CCND2, PSME2, PSMA4, JUN, NCK1, PSMA3, CD81, MAP3K10, IL12A, BUB1B, HSPB1, PIAS1, PPP1R15A, UBA52, CAV1, CCK, ENPP1, BMPR2, KITLG, IGF2BP2, FEM1A, MTIF3, PIN1, PSMB6, BCL2, FBX…	1424	474	13528	1.50316	0.722566	0.0147984	0.584558
GOTERM_BP_FAT	GO:0006915~apoptosis	91	5.27842	0.000348215	STEAP3, E2F2, NUAK2, PDIA2, SGPP1, FASTK, NFKB1, SHF, PDCD4, PTEN, AKT1, TRIAP1, TNFRSF11B, APP, RAD21, CDKN2A, UNC5B, UNC5A, TIAM1, DEDD2, RTEL1, CIB1, TWIST1, ARHGEF3, MAGI3, ARHGEF2, DFFA, HRK, ARHGEF17, TBRG4, FADD, TNFRSF14, CDK5, DDIT4, DAPK1, OSM, TNFRSF10C, EYA2, TNFRSF10B, RASGRF1, TIAL1, JUN, BUB1B, NGFR, TNFAIP3, EIF2AK2, GADD45B, PPP1R15A, UBA52, BID, TRAF2, POLR2G, CCK, MCL1, CLU, ST…	1424	602	13528	1.43605	0.757845	0.0161687	0.646363
GOTERM_BP_FAT	GO:0051438~regulation of ubiquitin-protein ligase activity	20	1.16009	0.00035926	ANAPC5, CDC16, FEM1A, PIN1, PSMB9, PSMA1, PSMC6, PSMD14, CDKN2A, PSMB6, PSME1, PSMD11, PSME2, PLK1, PSMA4, PSMA3, PSMD2, BUB1B, FBXO5, UBA52	1424	78	13528	2.4359	0.768499	0.0164895	0.666802
GOTERM_BP_FAT	GO:0012501~programmed cell death	92	5.33643	0.000363471	STEAP3, E2F2, NUAK2, PDIA2, SGPP1, FASTK, NFKB1, SHF, PDCD4, PTEN, AKT1, TRIAP1, TNFRSF11B, APP, RAD21, CDKN2A, UNC5B, UNC5A, TIAM1, DEDD2, RTEL1, CIB1, TWIST1, ARHGEF3, MAGI3, ARHGEF2, DFFA, HRK, ARHGEF17, TBRG4, FADD, TNFRSF14, CDK5, DDIT4, DAPK1, OSM, TNFRSF10C, EYA2, TNFRSF10B, RASGRF1, TIAL1, JUN, BUB1B, NGFR, TNFAIP3, EIF2AK2, GADD45B, PPP1R15A, UBA52, BID, TRAF2, POLR2G, CCK, MCL1, CLU, ST…	1424	611	13528	1.43044	0.772436	0.0164953	0.674592
GOTERM_BP_FAT	GO:0008284~positive regulation of cell proliferation	67	3.88631	0.00036545	FGF18, FOSL2, NRP1, IL6ST, PDGFA, TACR1, PAX6, VIPR1, IL11, TNFRSF11A, DDX11, MYOCD, CHRFAM7A, AGPAT1, SYK, PRKCA, EGFR, CDC7, CAPNS1, NODAL, TBRG4, MFGE8, IRS1, CDK2, PURA, MYCN, OSM, CD38, CCND1, ADRB2, HIPK1, ADM, EREG, CCND2, JUN, NCK1, CD81, IL12A, NGFR, DERL2, FGFR4, ERBB4, ERBB2, SOX2, CLU, ST8SIA1, KITLG, ITGB1, T, ALDH1A2, KRAS, LHX1, BCL2, CRIP2, TGFBR2, CD276, ITGA2, IGF2, NTN1, KDR, C…	1424	414	13528	1.53744	0.774262	0.0164016	0.678252
GOTERM_BP_FAT	GO:0043065~positive regulation of apoptosis	69	4.00232	0.00037844	FASTK, TUBB2C, PTEN, AKT1, APP, CDKN2A, CD44, TIAM1, MX1, DEDD2, WWOX, RAB27A, PRKCA, ARHGEF3, ARHGEF2, PTPRF, DFFA, HRK, ARHGEF17, FADD, GAL, CDK5, DAPK1, CD38, ADRB2, TNFRSF10B, HIPK1, RASGRF1, TIAL1, JUN, MAP3K10, IL12A, NGFR, UBA52, BID, TRAF2, CCK, STK17B, TNFRSF8, STK17A, SERINC3, MSX2, BCL2, RAC1, MTCH1, DIABLO, AATF, RUNX3, TEX261, FOXL2, CEBPB, GRIN1, ITGA1, CIDEA, TRIO, BRCA2, SOD1, VAV…	1424	430	13528	1.52442	0.785897	0.0167947	0.702281
GOTERM_BP_FAT	GO:0042327~positive regulation of phosphorylation	23	1.33411	0.000379997	PRKCA, EGFR, CAV1, CCK, GDF7, IL6ST, BMPR2, KITLG, IGF2, TNFRSF14, IL11, OSM, EDNRB, ACVR2A, CCND1, EREG, CCND2, BCL2, CD81, IL12A, GLMN, TNK2, SYK	1424	97	13528	2.25258	0.787251	0.0166815	0.705161
GOTERM_BP_FAT	GO:0043068~positive regulation of programmed cell death	69	4.00232	0.000459971	FASTK, TUBB2C, PTEN, AKT1, APP, CDKN2A, CD44, TIAM1, MX1, DEDD2, WWOX, RAB27A, PRKCA, ARHGEF3, ARHGEF2, PTPRF, DFFA, HRK, ARHGEF17, FADD, GAL, CDK5, DAPK1, CD38, ADRB2, TNFRSF10B, HIPK1, RASGRF1, TIAL1, JUN, MAP3K10, IL12A, NGFR, UBA52, BID, TRAF2, CCK, STK17B, TNFRSF8, STK17A, SERINC3, MSX2, BCL2, RAC1, MTCH1, DIABLO, AATF, RUNX3, TEX261, FOXL2, CEBPB, GRIN1, ITGA1, CIDEA, TRIO, BRCA2, SOD1, VAV…	1424	433	13528	1.51386	0.846405	0.0199429	0.852968
GOTERM_BP_FAT	GO:0019216~regulation of lipid metabolic process	25	1.45012	0.000514949	CAV1, THRB, STK11, PDGFA, NFKB1, LSR, AKT1, DHCR7, RAC1, PRKAA1, WDTC1, PRKAB2, RBL1, SF1, CIDEA, IGF2, RB1, SOD1, VAV2, GAL, IRS1, SCAP, NPC2, CD81, BMP6	1424	112	13528	2.12054	0.877226	0.0220658	0.954457
GOTERM_BP_FAT	GO:0010942~positive regulation of cell death	69	4.00232	0.000525602	FASTK, TUBB2C, PTEN, AKT1, APP, CDKN2A, CD44, TIAM1, MX1, DEDD2, WWOX, RAB27A, PRKCA, ARHGEF3, ARHGEF2, PTPRF, DFFA, HRK, ARHGEF17, FADD, GAL, CDK5, DAPK1, CD38, ADRB2, TNFRSF10B, HIPK1, RASGRF1, TIAL1, JUN, MAP3K10, IL12A, NGFR, UBA52, BID, TRAF2, CCK, STK17B, TNFRSF8, STK17A, SERINC3, MSX2, BCL2, RAC1, MTCH1, DIABLO, AATF, RUNX3, TEX261, FOXL2, CEBPB, GRIN1, ITGA1, CIDEA, TRIO, BRCA2, SOD1, VAV…	1424	435	13528	1.5069	0.882441	0.0222829	0.974111
GOTERM_BP_FAT	GO:0007169~transmembrane receptor protein tyrosine kinase signaling pathway	41	2.37819	0.000563526	FGF18, FGFR4, NRP1, ERBB4, EFNA1, PDGFA, ERBB2, BMPR2, PTEN, SLC2A8, AKT1, EIF4EBP1, DGKD, TIAM1, EGFR, SOCS2, PTPRG, MYO1E, IGF2, CDK5, IRS1, EPHA2, KDR, NTRK3, EPS15, EPHA5, EPHA4, SS18, DDR1, EPHA7, ADRB2, EPS8, ERBB2IP, EREG, GSK3A, EPHA8, NCK1, FOXC2, ROR2, FOXC1, IGFBP1	1424	224	13528	1.73884	0.899271	0.023626	1.04405
GOTERM_BP_FAT	GO:0043069~negative regulation of programmed cell death	59	3.42227	0.000575854	SNCB, NUAK2, MITF, CBX4, NFKB1, PRDX2, PAX2, PTEN, CITED2, AKT1, TRIAP1, EDNRB, PCGF2, TPT1, PIK3CA, RTEL1, EGFR, SGK3, SOCS2, DFFA, BARHL1, HRK, POLB, DAPK1, BTG2, TXNDC5, FOXC2, HSPB1, FOXC1, NGFR, TNFAIP3, UBA52, HMGB1, MCL1, ERBB2, CLU, ASNS, HSPA1A, MIF, MSX2, KRAS, BCL2, DAD1, LHX4, AATF, HSPA5, HELLS, CEBPB, GRIN1, CIDEA, BIRC5, IGF2, PDE3A, SOD1, CDH13, NOTCH1, MAPK8IP1, IKBKB, F2R	1424	359	13528	1.56128	0.904206	0.0238909	1.06677
GOTERM_BP_FAT	GO:0045937~positive regulation of phosphate metabolic process	23	1.33411	0.000593786	PRKCA, EGFR, CAV1, CCK, GDF7, IL6ST, BMPR2, KITLG, IGF2, TNFRSF14, IL11, OSM, EDNRB, ACVR2A, CCND1, EREG, CCND2, BCL2, CD81, IL12A, GLMN, TNK2, SYK	1424	100	13528	2.185	0.910955	0.0243777	1.09982
GOTERM_BP_FAT	GO:0010562~positive regulation of phosphorus metabolic process	23	1.33411	0.000593786	PRKCA, EGFR, CAV1, CCK, GDF7, IL6ST, BMPR2, KITLG, IGF2, TNFRSF14, IL11, OSM, EDNRB, ACVR2A, CCND1, EREG, CCND2, BCL2, CD81, IL12A, GLMN, TNK2, SYK	1424	100	13528	2.185	0.910955	0.0243777	1.09982
GOTERM_BP_FAT	GO:0051340~regulation of ligase activity	20	1.16009	0.000596945	ANAPC5, CDC16, FEM1A, PIN1, PSMB9, PSMA1, PSMC6, PSMD14, CDKN2A, PSMB6, PSME1, PSMD11, PSME2, PLK1, PSMA4, PSMA3, PSMD2, BUB1B, FBXO5, UBA52	1424	81	13528	2.34568	0.912094	0.0242613	1.10564
GOTERM_BP_FAT	GO:0060548~negative regulation of cell death	59	3.42227	0.00062065	SNCB, NUAK2, MITF, CBX4, NFKB1, PRDX2, PAX2, PTEN, CITED2, AKT1, TRIAP1, EDNRB, PCGF2, TPT1, PIK3CA, RTEL1, EGFR, SGK3, SOCS2, DFFA, BARHL1, HRK, POLB, DAPK1, BTG2, TXNDC5, FOXC2, HSPB1, FOXC1, NGFR, TNFAIP3, UBA52, HMGB1, MCL1, ERBB2, CLU, ASNS, HSPA1A, MIF, MSX2, KRAS, BCL2, DAD1, LHX4, AATF, HSPA5, HELLS, CEBPB, GRIN1, CIDEA, BIRC5, IGF2, PDE3A, SOD1, CDH13, NOTCH1, MAPK8IP1, IKBKB, F2R	1424	360	13528	1.55694	0.920187	0.0249638	1.1493
GOTERM_BP_FAT	GO:0045669~positive regulation of osteoblast differentiation	10	0.580046	0.000656043	ACVR2A, WNT7B, PDLIM7, IL6ST, DLX5, SMAD5, CD276, BMPR2, GNAS, BMP6	1424	25	13528	3.8	0.930906	0.0261113	1.21447
GOTERM_BP_FAT	GO:0008285~negative regulation of cell proliferation	59	3.42227	0.000665848	ACVRL1, TSG101, E2F7, PAX6, CXADR, PTEN, WNT2, CTTNBP2, CDKN2A, CDKN2B, ASPH, CSK, PRKCA, CGRRF1, CTBP2, PTPRF, SF1, TNFRSF14, RB1, VAX1, GAL, OSM, MFN2, DDR1, CTH, PPM1D, BTG2, ADM, EREG, BTG4, JUN, IL12A, EIF2AK2, CAV2, CAV1, STK11, ERBB2, IFI30, TNFRSF8, MSX2, ALDH1A2, CD9, BCL2, BAI1, TINF2, RUNX3, WDR6, TGFBR2, CD276, BRCA2, TMEM115, CDKN1C, CDH13, CDKN1B, EEF1E1, ATP8A2, GLMN, TOB2, F2R	1424	361	13528	1.55263	0.933612	0.0262401	1.23251
GOTERM_BP_FAT	GO:0030032~lamellipodium assembly	8	0.464037	0.000681318	CDH13, NCK1, WASF2, RAC1, ARFIP2, CYFIP1, VAV2, VCL	1424	16	13528	4.75	0.937668	0.0265846	1.26098
GOTERM_BP_FAT	GO:0006270~DNA replication initiation	8	0.464037	0.000681318	MCM7, ORC5L, CDC34, MCM2, MCM4, ORC1L, MCM6, PURA	1424	16	13528	4.75	0.937668	0.0265846	1.26098
GOTERM_BP_FAT	GO:0043066~negative regulation of apoptosis	58	3.36427	0.000697626	SNCB, NUAK2, MITF, CBX4, NFKB1, PRDX2, PTEN, CITED2, AKT1, TRIAP1, EDNRB, PCGF2, TPT1, PIK3CA, RTEL1, EGFR, SGK3, SOCS2, DFFA, BARHL1, HRK, POLB, DAPK1, BTG2, TXNDC5, FOXC2, HSPB1, FOXC1, NGFR, TNFAIP3, UBA52, HMGB1, MCL1, ERBB2, CLU, ASNS, HSPA1A, MIF, MSX2, KRAS, BCL2, DAD1, LHX4, AATF, HSPA5, HELLS, CEBPB, GRIN1, CIDEA, BIRC5, IGF2, PDE3A, SOD1, CDH13, NOTCH1, MAPK8IP1, IKBKB, F2R	1424	354	13528	1.5565	0.941675	0.0269543	1.29097
GOTERM_BP_FAT	GO:0014070~response to organic cyclic substance	26	1.50812	0.000704971	SLC6A3, TACR1, DRD4, OXTR, TRH, PTEN, HTR1B, CD44, CDKN2B, BCL2, VKORC1, CHRNA4, CHRFAM7A, PRKCA, CYP1A1, GRIN1, TGFBR2, ITGA2, BRCA2, CDK5, CD83, GNAL, CCND1, BTG2, CCND2, JUN	1424	121	13528	2.04132	0.943395	0.0269785	1.30448
GOTERM_BP_FAT	GO:0060541~respiratory system development	24	1.39211	0.000730647	CAV2, FGF18, RAB3A, FGFR4, FOXA2, PDPN, PDGFA, NODAL, SOX2, TGFBR2, BMPR2, MYCN, KDR, WNT2, ASCL1, MAN2A1, CTTNBP2, ALDH1A2, SPRY2, NOTCH1, DHCR7, SP3, HHIP, SIM2	1424	108	13528	2.11111	0.949018	0.0276876	1.35169
GOTERM_BP_FAT	GO:0043085~positive regulation of catalytic activity	79	4.58237	0.00076173	ADCY4, ADCY1, EFNA1, TACR1, PRDX2, CDC16, AKT1, EDNRB, CDKN2A, GALR1, MAP3K9, PSMD2, CHRFAM7A, SYK, EGFR, PTGER3, ANAPC5, IRS1, CDK5, GNAL, PSMA1, CCND1, ADRB2, TNFRSF10B, PSME1, EREG, CCND2, PSME2, RASGRF1, PSMA4, PSMA3, CD81, MAP3K10, GNAS, GADD45B, UBA52, TRAF2, CAV1, CCK, PFKFB2, ERBB2, DRD4, KITLG, DUSP12, PIN1, SLC11A2, KRAS, PSMB6, DGKE, DGKD, BCL2, NPM2, MTCH1, RAC1, P2RY1, FBXO5, DIABLO,…	1424	520	13528	1.44327	0.955083	0.0285831	1.4088
GOTERM_BP_FAT	GO:0040008~regulation of growth	56	3.24826	0.000820358	MYOD1, NRP1, ACVRL1, TSG101, SLC6A3, NELL2, VGF, CXADR, AKT1, APP, CDKN2A, CD44, MYOCD, GATA4, PIK3CA, E4F1, HTRA3, CGRRF1, SOCS2, SOCS6, RB1, HMGA2, OSM, CD38, DDR1, ADRB2, CTH, CD320, FOXC2, FOXC1, UBA52, DERL2, ENPP1, ABTB2, EGLN2, GREM1, NDRG3, BCL2, ACTL6A, CRIM1, ATRN, TGFBR2, IGF2, WRN, SOD1, NTN1, NTRK3, CDH13, ATXN2, CDKN1B, DIO3, KAZALD1, CXCL16, OGFR, IGFBP1, APBB1	1424	341	13528	1.56012	0.964629	0.0304694	1.51645
GOTERM_BP_FAT	GO:0007223~Wnt receptor signaling pathway, calcium modulating pathway	9	0.522042	0.000850862	WNT2, WNT1, WNT10A, WNT4, WNT7B, WNT9B, ROR2, FZD2, WNT6	1424	21	13528	4.07143	0.968764	0.0312996	1.57242
GOTERM_BP_FAT	GO:0007242~intracellular signaling cascade	167	9.68677	0.000866514	ADCY4, ADCY1, IL6ST, EFNA1, TIRAP, VIPR1, RAB1A, GNG8, HMHA1, HTR1B, GALR1, TIAM1, MAP3K9, RALB, PIK3CA, TLK1, MLL3, DDAH1, SAR1A, MAP2K7, RAB27A, SYK, EGFR, GTPBP2, PLD2, MAGI3, MAGI2, MYO6, SOCS2, DFFA, SOCS6, CYP26A1, COLEC12, WNK2, IRS1, MAP4K3, MAP4K4, RAB18, RASGRF1, HTR6, COL1A2, ROR2, SDCBP, ARL8A, PIAS1, NEURL2, TRAF2, CAV1, HIST1H4K, RALGPS1, CNIH, ERBB2, DRD4, STK17B, RAB40C, AKAP11, S…	1424	1256	13528	1.26314	0.970694	0.0315812	1.60112
GOTERM_BP_FAT	GO:0007049~cell cycle	110	6.38051	0.000941342	JAG2, PKMYT1, CDC16, WTAP, APP, RAD21, CDKN2A, DDX11, CDKN2B, CDCA2, TLK1, EGFR, CGRRF1, ANAPC5, PDPN, RBL1, TBRG4, TACC3, PPP1CC, PSMA1, UHRF1, UHRF2, MAPK6, PSMA4, PSMA3, AKAP8, UBA52, STK11, ANLN, CDC34, ITGB1, PIN1, PSMB6, OVOL1, FBXO5, HELLS, PARD6A, MAP2K1, CKAP5, WDR6, BRCA2, PCNP, SUV39H2, PSMB9, CDKN1C, PSMC6, PLK3, CDKN1B, PLK1, PARD6G, NCOR1, GAS2L3, STEAP3, CCNT2, E2F2, CDC14A, E2F6, …	1424	776	13528	1.34665	0.978398	0.0339591	1.73824
GOTERM_BP_FAT	GO:0048568~embryonic organ development	33	1.91415	0.000952665	SOX2, PAX2, HOXD10, CITED2, T, ALDH1A2, WNT1, SPRY2, PCGF2, GATA4, ALX4, MYST3, FOXD3, FOXL2, MYO6, CEBPB, MAFB, NODAL, TGFBR2, HSPG2, NEUROG1, TBX1, NR4A3, SIX4, SOD1, HOXB4, DLX5, SP3, SIX1, FOXE1, FOXC2, ROR2, GNAS	1424	172	13528	1.82267	0.979372	0.0340591	1.75898
GOTERM_BP_FAT	GO:0033674~positive regulation of kinase activity	41	2.37819	0.00104791	ADCY4, TRAF2, ADCY1, CCK, EFNA1, ERBB2, PFKFB2, DRD4, KITLG, DUSP12, PRDX2, AKT1, KRAS, DGKE, DGKD, MAP3K9, RAC1, ADRA2C, PRKAA1, CHRFAM7A, SYK, EGFR, DGKQ, MAP2K1, TGFBR2, ITGA1, IGF2, VAV2, SOD1, CDK5, IRS1, CDC25B, ADRB2, CCND1, TNFRSF10B, EREG, CCND2, CD81, MAP3K10, GADD45B, F2R	1424	231	13528	1.68615	0.986009	0.0370769	1.93322
GOTERM_BP_FAT	GO:0007519~skeletal muscle tissue development	17	0.986079	0.00107997	MYOD1, CAV2, CAV1, FOXL2, ERBB2, CACNB4, SIX4, HOMER1, CDK5, HOXD10, APP, IGSF8, SIX1, VGLL2, NR2F2, CHAT, F2R	1424	66	13528	2.44697	0.987723	0.0378614	1.99181
GOTERM_BP_FAT	GO:0060538~skeletal muscle organ development	17	0.986079	0.00107997	MYOD1, CAV2, CAV1, FOXL2, ERBB2, CACNB4, SIX4, HOMER1, CDK5, HOXD10, APP, IGSF8, SIX1, VGLL2, NR2F2, CHAT, F2R	1424	66	13528	2.44697	0.987723	0.0378614	1.99181
GOTERM_BP_FAT	GO:0000079~regulation of cyclin-dependent protein kinase activity	15	0.87007	0.00108044	EGFR, CCNT2, CDK5R2, HERC5, PKMYT1, PTEN, CDC25A, AKT1, CDKN1C, CCND1, CDKN2A, CDKN1B, CDKN2B, CCND2, CKS2	1424	54	13528	2.63889	0.987746	0.0375543	1.99266
GOTERM_BP_FAT	GO:0048598~embryonic morphogenesis	51	2.95824	0.00112037	FOXA2, LMO4, JAG2, PAX2, HOXD10, ZIC2, SPRY2, WNT1, WNT4, PCGF2, GATA4, ALX4, TWIST1, MYO6, NODAL, SIX4, SLIT2, VASP, ACVR2A, EYA2, SIX1, ROR2, FOXC2, GNAS, FOXC1, SOX2, UGDH, BMPR2, GREM1, ZBTB17, MSX2, T, PFN1, ALDH1A2, LHX1, DVL2, TBX6, FOXL2, MAFB, TGFBR2, HSPG2, NEUROG1, TBX1, NR4A3, SOD1, HOXB4, NOTCH1, DKK1, DLX5, SP3, FOXE1	1424	307	13528	1.57818	0.989587	0.0385865	2.06557
GOTERM_BP_FAT	GO:0032270~positive regulation of cellular protein metabolic process	41	2.37819	0.00124104	CAV1, CCK, GDF7, IL6ST, BMPR2, KITLG, CDC16, IL11, PIN1, AKT1, EDNRB, PSMB6, BCL2, PSMD2, FBXO5, EIF2B5, SYK, PRKCA, ANAPC5, ITGA2, IGF2, TNFRSF14, PSMB9, OSM, ACVR2A, PSMA1, PSMD14, PSMC6, CCND1, PSME1, CCND2, PSME2, PSMD11, PLK1, PSMA4, PSMA3, CD81, IL12A, TNK2, PIAS1, UBA52	1424	233	13528	1.67167	0.993633	0.0422985	2.28562
GOTERM_BP_FAT	GO:0006468~protein amino acid phosphorylation	96	5.56845	0.00124776	MYOD1, ACVRL1, PRPF4B, NUAK2, GDF7, EFNA1, FASTK, PKMYT1, PRDX2, CAD, CLK1, PRKG1, WNT2, AKT1, CTTNBP2, APP, PSKH1, CLK2, MAP3K9, MOS, EEF2K, PIK3CA, TLK1, CSK, CHRFAM7A, MAP2K7, SYK, PRKCA, EGFR, CDC7, SGK3, STK25, PHKG2, PKN2, PRKCH, WNK2, PRKCD, CDK5, SRPK1, CDK2, DAPK1, OSM, MAP4K3, DDR1, MAP4K4, PRKD2, ACVR2A, CCND1, MAST1, HIPK1, MAPK6, RIOK3, CD81, MAP3K10, ROR2, GADD45B, EIF2AK2, MELK, CA…	1424	667	13528	1.36732	0.993805	0.0421703	2.29788
GOTERM_BP_FAT	GO:0031400~negative regulation of protein modification process	25	1.45012	0.00127171	CAV1, ENPP1, CDC16, CDKN2A, PSMB6, PSMD2, FBXO5, TINF2, PRKCA, ANAPC5, PRKCD, YWHAE, CDK5, PSMB9, PSMA1, PSMD14, PSMC6, PSME1, PSME2, PSMD11, PSMA4, JUN, PSMA3, BUB1B, UBA52	1424	119	13528	1.9958	0.994382	0.0426092	2.34148
GOTERM_BP_FAT	GO:0051352~negative regulation of ligase activity	17	0.986079	0.00128279	ANAPC5, CDC16, PSMB9, PSMA1, PSMC6, PSMD14, CDKN2A, PSMB6, PSME1, PSMD11, PSME2, PSMA4, PSMA3, PSMD2, BUB1B, FBXO5, UBA52	1424	67	13528	2.41045	0.99463	0.0426222	2.36165
GOTERM_BP_FAT	GO:0051444~negative regulation of ubiquitin-protein ligase activity	17	0.986079	0.00128279	ANAPC5, CDC16, PSMB9, PSMA1, PSMC6, PSMD14, CDKN2A, PSMB6, PSME1, PSMD11, PSME2, PSMA4, PSMA3, PSMD2, BUB1B, FBXO5, UBA52	1424	67	13528	2.41045	0.99463	0.0426222	2.36165
GOTERM_BP_FAT	GO:0030324~lung development	22	1.2761	0.00128551	CAV2, FGF18, RAB3A, FGFR4, FOXA2, PDPN, PDGFA, NODAL, TGFBR2, BMPR2, MYCN, KDR, WNT2, MAN2A1, CTTNBP2, ALDH1A2, SPRY2, NOTCH1, DHCR7, SP3, HHIP, SIM2	1424	99	13528	2.11111	0.994689	0.0423655	2.36661
GOTERM_BP_FAT	GO:0048562~embryonic organ morphogenesis	27	1.56613	0.00131835	SOX2, PAX2, HOXD10, WNT1, SPRY2, PCGF2, GATA4, ALX4, FOXL2, MYO6, MAFB, NODAL, TGFBR2, HSPG2, NEUROG1, TBX1, NR4A3, SIX4, SOD1, HOXB4, DLX5, SP3, SIX1, FOXE1, ROR2, FOXC2, GNAS	1424	133	13528	1.92857	0.995355	0.0430764	2.42637
GOTERM_BP_FAT	GO:0031667~response to nutrient levels	36	2.08817	0.00132517	CAV1, CCK, NUAK2, IL6ST, PDGFA, SOX2, BMPR2, ASNS, PTEN, AQP3, AKT1, ALDH1A2, TNFRSF11B, CDKN2B, CD44, BCL2, SLC30A4, DAD1, HSPA5, TNRC6A, MEST, CYP1A1, TGFBR2, HRK, BRCA2, ITGA2, SOD1, SIRT1, C12ORF44, CD38, CCND1, DUSP1, ADM, JUN, LIPG, COL1A1	1424	197	13528	1.73604	0.995482	0.0429502	2.43877
GOTERM_BP_FAT	GO:0009952~anterior/posterior pattern formation	28	1.62413	0.00132853	FOXA2, BMPR2, PAX6, HOXD10, TCF7L1, ALDH1A2, WNT1, T, PCGF2, LHX1, GATA4, ALX4, NR2F2, NODAL, RING1, SIX3, CYP26A1, DLL1, TBX1, ACVR2A, HOXB4, NOTCH1, HIPK1, BTG2, SFRP2, ROR2, PBX3, TCF15	1424	140	13528	1.9	0.995543	0.042717	2.44488
GOTERM_BP_FAT	GO:0031397~negative regulation of protein ubiquitination	18	1.04408	0.00145285	ANAPC5, CDC16, CDK5, PSMB9, PSMA1, PSMC6, PSMD14, CDKN2A, PSMB6, PSME1, PSMD11, PSME2, PSMA4, PSMA3, PSMD2, BUB1B, FBXO5, UBA52	1424	74	13528	2.31081	0.997316	0.0462585	2.67075
GOTERM_BP_FAT	GO:0007498~mesoderm development	18	1.04408	0.00145285	TBX6, SECTM1, NODAL, BMPR2, TBX1, NR4A3, SLIT2, TCF7L1, T, ACVR2A, EYA2, OSR1, LHX2, OVOL1, FOXC2, FOXC1, TCF15, MEST	1424	74	13528	2.31081	0.997316	0.0462585	2.67075
GOTERM_BP_FAT	GO:0051247~positive regulation of protein metabolic process	42	2.43619	0.00152897	CAV1, CCK, GDF7, IL6ST, BMPR2, KITLG, EGLN2, CDC16, IL11, PIN1, AKT1, EDNRB, PSMB6, BCL2, PSMD2, FBXO5, EIF2B5, SYK, PRKCA, ANAPC5, ITGA2, IGF2, TNFRSF14, PSMB9, OSM, ACVR2A, PSMA1, PSMD14, PSMC6, CCND1, PSME1, CCND2, PSME2, PSMD11, PLK1, PSMA4, PSMA3, CD81, IL12A, TNK2, PIAS1, UBA52	1424	243	13528	1.64198	0.998032	0.0482474	2.80879
GOTERM_BP_FAT	GO:0043010~camera-type eye development	23	1.33411	0.00153241	FOXL2, RAX, IRX5, SOX1, CYP1A1, SOX2, PTF1A, MITF, RING1, SIX3, PAX6, ABI2, VAX1, PAX2, MFN2, ALDH1A2, PKNOX1, SP3, PYGO2, FOXC2, POU4F2, FOXC1, MAB21L1	1424	107	13528	2.04206	0.998059	0.0479819	2.81503
GOTERM_BP_FAT	GO:0006916~anti-apoptosis	37	2.14617	0.00154104	HMGB1, MCL1, CLU, CBX4, NFKB1, HSPA1A, PRDX2, CITED2, AKT1, TRIAP1, BCL2, DAD1, TPT1, LHX4, PIK3CA, AATF, HSPA5, HELLS, RTEL1, CEBPB, SGK3, SOCS2, HRK, BIRC5, POLB, SOD1, DAPK1, CDH13, TXNDC5, FOXC2, HSPB1, FOXC1, MAPK8IP1, NGFR, TNFAIP3, IKBKB, UBA52	1424	206	13528	1.70631	0.998127	0.0478781	2.83067
GOTERM_BP_FAT	GO:0051960~regulation of nervous system development	35	2.03016	0.0016313	NRP1, FOXA2, EFNA1, SOX2, SOX5, PAX6, OXTR, CDH2, PRPF19, ACTR3, LHX1, TIAM1, BCL2, NKX6-2, TLX3, NKX2-2, PRKCA, PTPRF, DTX1, GRIN1, RTN4R, DLL1, VAX1, NEUROG3, NTN1, SLIT2, NTRK3, ASCL1, NOTCH1, YWHAH, CCND2, SIX1, NGFR, DBN1, UBA52	1424	192	13528	1.73177	0.998703	0.05023	2.99409
GOTERM_BP_FAT	GO:0048732~gland development	27	1.56613	0.00164921	CAV2, NEURL, CAV1, ERBB4, SLC6A3, ERBB2, SOX2, PAX6, OXTR, CDH1, CITED2, WNT2, ALDH1A2, CTTNBP2, BCL2, SLC30A4, EGFR, BRCA2, ITGA2, TBX1, CDO1, NTN1, IRS1, DDR1, SIX1, FOXE1, FOXC1	1424	135	13528	1.9	0.998795	0.0503872	3.02649
GOTERM_BP_FAT	GO:0045859~regulation of protein kinase activity	55	3.19026	0.00182883	CCNT2, ADCY4, ADCY1, EFNA1, PKMYT1, PRDX2, PTEN, PDCD4, AKT1, SPRY2, APP, CDKN2A, CDKN2B, MAP3K9, CHRFAM7A, SYK, PRKCA, EGFR, HERC5, RB1, CDK5, PKIA, CCND1, ADRB2, TNFRSF10B, EREG, CCND2, CD81, MAP3K10, GADD45B, TRAF2, CAV1, CDK5R2, CCK, ERBB2, DRD4, KITLG, KRAS, DGKE, DGKD, PRKAA1, ADRA2C, DGKQ, MAP2K1, TGFBR2, ITGA1, IGF2, SOD1, CDC25A, CDC25B, CDKN1C, CDKN1B, CKS2, MAPK8IP1, F2R	1424	345	13528	1.51449	0.999421	0.0553108	3.35083
GOTERM_BP_FAT	GO:0030879~mammary gland development	16	0.928074	0.00185527	CAV2, CAV1, NEURL, ERBB4, ERBB2, SLC6A3, ITGA2, BRCA2, OXTR, CDO1, IRS1, NTN1, WNT2, DDR1, CTTNBP2, SLC30A4	1424	63	13528	2.4127	0.99948	0.0556755	3.39848
GOTERM_BP_FAT	GO:0030323~respiratory tube development	22	1.2761	0.00190511	CAV2, FGF18, RAB3A, FGFR4, FOXA2, PDPN, PDGFA, NODAL, TGFBR2, BMPR2, MYCN, KDR, WNT2, MAN2A1, CTTNBP2, ALDH1A2, SPRY2, NOTCH1, DHCR7, SP3, HHIP, SIM2	1424	102	13528	2.04902	0.999576	0.056712	3.48826
GOTERM_BP_FAT	GO:0001934~positive regulation of protein amino acid phosphorylation	20	1.16009	0.0019803	PRKCA, CAV1, CCK, GDF7, IL6ST, BMPR2, KITLG, TNFRSF14, IGF2, IL11, OSM, EDNRB, ACVR2A, CCND1, CCND2, BCL2, CD81, IL12A, TNK2, SYK	1424	89	13528	2.13483	0.999688	0.0584586	3.62353
GOTERM_BP_FAT	GO:0000278~mitotic cell cycle	58	3.36427	0.00203315	E2F6, PKMYT1, CDC16, AKT1, APP, CDKN2A, RAD21, CDKN2B, DDX11, CDCA2, PSMD2, E4F1, ZW10, VCPIP1, CDC7, EGFR, KHDRBS1, ARHGEF2, ANAPC5, TBRG4, UBE2I, RB1, HMGA2, CDK2, PSMA1, CCND1, PPM1D, PSME1, CCND2, PSME2, PSMA4, PSMA3, BUB1B, MAPRE2, AKAP8, KPNA2, UBA52, PPP6C, ANLN, CDC34, ITGB1, PSMB6, BCL2, FBXO5, HELLS, MAP2K1, CKAP5, BIRC5, CDC25A, PSMB9, CDC25B, CDKN1C, PSMC6, PSMD14, CDKN1B, PSMD11, PLK…	1424	370	13528	1.48919	0.999748	0.059542	3.71852
GOTERM_BP_FAT	GO:0043550~regulation of lipid kinase activity	6	0.348028	0.00204692	CD81, RBL1, RAC1, RB1, VAV2, IRS1	1424	10	13528	5.7	0.999762	0.059506	3.74325
GOTERM_BP_FAT	GO:0051443~positive regulation of ubiquitin-protein ligase activity	17	0.986079	0.00209325	ANAPC5, CDC16, PIN1, PSMB9, PSMA1, PSMC6, PSMD14, PSMB6, PSME1, PSMD11, PSME2, PLK1, PSMA4, PSMA3, PSMD2, FBXO5, UBA52	1424	70	13528	2.30714	0.999803	0.0603821	3.82641
GOTERM_BP_FAT	GO:0050767~regulation of neurogenesis	31	1.79814	0.00215889	NRP1, FOXA2, EFNA1, SOX2, PAX6, SOX5, CDH2, ACTR3, PRPF19, TIAM1, BCL2, NKX6-2, TLX3, NKX2-2, PTPRF, DTX1, GRIN1, RTN4R, DLL1, VAX1, NEUROG3, NTN1, SLIT2, NTRK3, ASCL1, NOTCH1, YWHAH, CCND2, SIX1, NGFR, DBN1	1424	166	13528	1.7741	0.999849	0.0617809	3.94414
GOTERM_BP_FAT	GO:0051347~positive regulation of transferase activity	41	2.37819	0.00218385	ADCY4, TRAF2, ADCY1, CCK, EFNA1, ERBB2, PFKFB2, DRD4, KITLG, DUSP12, PRDX2, AKT1, KRAS, DGKE, DGKD, MAP3K9, RAC1, ADRA2C, PRKAA1, CHRFAM7A, SYK, EGFR, DGKQ, MAP2K1, TGFBR2, ITGA1, IGF2, VAV2, SOD1, CDK5, IRS1, CDC25B, ADRB2, CCND1, TNFRSF10B, EREG, CCND2, CD81, MAP3K10, GADD45B, F2R	1424	240	13528	1.62292	0.999864	0.0620379	3.98886
GOTERM_BP_FAT	GO:0045471~response to ethanol	16	0.928074	0.0021922	PRKCA, SLC6A3, TACR1, DRD4, GRIN1, GGH, TRH, CDO1, SOD1, PTEN, ATP5G3, CCND1, HTR1B, EPS8, CCND2, BCL2	1424	64	13528	2.375	0.999868	0.0618372	4.00383
GOTERM_BP_FAT	GO:0006541~glutamine metabolic process	8	0.464037	0.0022606	GLUL, GLS, GFPT2, GGH, PHGDH, ASNSD1, CAD, ASNS	1424	19	13528	4	0.999901	0.0632686	4.12627
GOTERM_BP_FAT	GO:0007005~mitochondrion organization	27	1.56613	0.00227815	BID, RAB3A, CAV2, CCK, SAMM50, MTX1, CLU, RNASEH1, TIMM13, CXADR, AKT1, TFAM, CDKN2A, MRPL12, BCL2, NDUFS8, SYNJ2, HSPA4, MSTO1, DNM1L, POLG, MFN2, PPIF, MAN2A1, TOMM70A, JUN, TOMM22	1424	138	13528	1.8587	0.999907	0.0633099	4.15766
GOTERM_BP_FAT	GO:0009064~glutamine family amino acid metabolic process	14	0.812065	0.00229731	PYCRL, GLUD1, GGH, ASNSD1, ASNS, CAD, GLUL, GLS, ARG2, GFPT2, PHGDH, ALDH4A1, ASRGL1, DDAH1	1424	52	13528	2.55769	0.999914	0.0633939	4.19194
GOTERM_BP_FAT	GO:0050678~regulation of epithelial cell proliferation	17	0.986079	0.00244382	EGFR, ERBB4, ERBB2, TACR1, PAX6, BRCA2, KDR, CDKN1C, EDNRB, NOTCH1, CDKN1B, CDKN2B, EREG, CCND2, DLX5, TINF2, RUNX3	1424	71	13528	2.27465	0.999953	0.0668511	4.45356
GOTERM_BP_FAT	GO:0051439~regulation of ubiquitin-protein ligase activity during mitotic cell cycle	17	0.986079	0.00244382	ANAPC5, CDC16, PSMB9, PSMA1, PSMC6, PSMD14, PSMB6, PSME1, PSMD11, PSME2, PLK1, PSMA4, PSMA3, PSMD2, BUB1B, FBXO5, UBA52	1424	71	13528	2.27465	0.999953	0.0668511	4.45356
GOTERM_BP_FAT	GO:0009719~response to endogenous stimulus	62	3.59629	0.00245791	ADCY4, ADCY1, PDGFA, TACR1, VGF, PTEN, WNT2, GNG8, AKT1, SLC2A8, CTTNBP2, EIF4EBP1, TNFRSF11B, HTR1B, VKORC1, EIF2B5, PRKCA, SOCS2, MFGE8, CDO1, GAL, IRS1, GNAL, CD38, CCND1, BTG2, ADM, CCND2, FOXC2, GNAS, COL1A1, CAV2, CAV1, ERBB4, ENPP1, ERBB2, DRD4, HMGCS1, OXTR, GNG11, ASNS, TRH, ALDH1A2, KRAS, BCL2, WDTC1, MAP2K1, TGFBR2, GRIN1, GGH, ITGA2, BRCA2, IGF2, NR4A3, KHK, CDH13, DUSP1, GSK3A, SLC18…	1424	405	13528	1.45432	0.999956	0.066776	4.47868
GOTERM_BP_FAT	GO:0006366~transcription from RNA polymerase II promoter	40	2.32019	0.00246172	CCNT2, E2F2, POLR2G, ARID4A, ELL, LMO4, SOX5, BMPR2, NFKB1, NFYA, PAX2, CBFB, FEV, MAX, GTF2E2, TCERG1, GTF2A1, HSF2, GTF2A2, ECD, POU2F2, GATA4, BTF3, SKIL, APEX1, RUNX3, NFX1, MAFF, CEBPB, DTX1, SNAPC3, GABPA, ELL3, MSC, MED4, TAF12, GTF2I, IRF7, ASH1L, NCOR1	1424	234	13528	1.62393	0.999956	0.0664334	4.48547
GOTERM_BP_FAT	GO:0001501~skeletal system development	51	2.95824	0.00257005	FGF18, PDLIM7, TUFT1, HEXA, TCOF1, JAG2, SLC26A2, CBFB, HOXD10, PEX7, TNFRSF11B, PCGF2, TNFRSF11A, BARX2, COL12A1, ALX4, WWOX, TWIST1, PRKCA, EGFR, NODAL, SIX4, ACVR2A, NAB2, SIX1, COL1A2, ROR2, FOXC2, GNAS, FOXC1, COL1A1, SOX5, ACP2, SUFU, MSX2, BCL2, SMAD5, TGFBR2, FBN1, HSPG2, IGF2, TBX1, SHOX2, HOXB4, DLX5, KAZALD1, ETS2, SP3, TCF15, CDH11, BMP6	1424	319	13528	1.51881	0.999972	0.0688025	4.67842
GOTERM_BP_FAT	GO:0051436~negative regulation of ubiquitin-protein ligase activity during mitotic cell cycle	16	0.928074	0.00257837	ANAPC5, CDC16, PSMB9, PSMA1, PSMC6, PSMD14, PSMB6, PSME1, PSMD11, PSME2, PSMA4, PSMA3, PSMD2, BUB1B, FBXO5, UBA52	1424	65	13528	2.33846	0.999973	0.0685676	4.69322
[truncated: 2,094 more rows]

## Sheet: RegressionsAnalysis
Data S4c: Bivariate analysis between modeule eigengenes and maternal and child variables
[truncated: 20 more rows]
